# Supplementary material for: The HPAfrica protocol: Assessment of health behaviour and population-based socioeconomic, hygiene behavioural factors - a standardised repeated cross-sectional study in multiple cohorts in sub-Saharan Africa
Source: PubMed Central journal article supplement (PMC6303690; doi:10.1136/bmjopen-2017-021438), 2018-12-19
Supplement: bmjopen-2017-021438.draft_revisions.pdf [file bmjopen-2017-021438.draft_revisions.pdf]

# BMJ Open

BMJ Open is committed to open peer review. As part of this commitment we make the peer review history of every article we publish publicly available.

When an article is published we post the peer reviewers' comments and the authors' responses online. We also post the versions of the paper that were used during peer review. These are the versions that the peer review comments apply to.

The versions of the paper that follow are the versions that were submitted during the peer review process. They are not the versions of record or the final published versions. They should not be cited or distributed as the published version of this manuscript.

BMJ Open is an open access journal and the full, final, typeset and author-corrected version of record of the manuscript is available on our site with no access controls, subscription charges or pay-per-view fees (<http://bmjopen.bmj.com>).

If you have any questions on BMJ Open's open peer review process please email [info.bmjopen@bmj.com](mailto:info.bmjopen@bmj.com)

# BMJ Open

## Assessment of health behavior and other population-based factors: a standardized study in multiple cohorts in sub-Saharan Africa

|                               |                                                                                                                                                                                                                                                                                                                                                                                                                                                                                                                                                                                                                                                                                                                                                                                                                                                                                                                                                                                                                                                                                                                                                                                                                                                                                                                                                                                                                                                                                                                                                                                                                                                                                                                                                                                                                                                                                                                                                                                                                                                                                                                                                                                                                                                                                                                                                                                                                                                                                                                                                                                                                                                                                                                                                                            |
|-------------------------------|----------------------------------------------------------------------------------------------------------------------------------------------------------------------------------------------------------------------------------------------------------------------------------------------------------------------------------------------------------------------------------------------------------------------------------------------------------------------------------------------------------------------------------------------------------------------------------------------------------------------------------------------------------------------------------------------------------------------------------------------------------------------------------------------------------------------------------------------------------------------------------------------------------------------------------------------------------------------------------------------------------------------------------------------------------------------------------------------------------------------------------------------------------------------------------------------------------------------------------------------------------------------------------------------------------------------------------------------------------------------------------------------------------------------------------------------------------------------------------------------------------------------------------------------------------------------------------------------------------------------------------------------------------------------------------------------------------------------------------------------------------------------------------------------------------------------------------------------------------------------------------------------------------------------------------------------------------------------------------------------------------------------------------------------------------------------------------------------------------------------------------------------------------------------------------------------------------------------------------------------------------------------------------------------------------------------------------------------------------------------------------------------------------------------------------------------------------------------------------------------------------------------------------------------------------------------------------------------------------------------------------------------------------------------------------------------------------------------------------------------------------------------------|
| Journal:                      | <i>BMJ Open</i>                                                                                                                                                                                                                                                                                                                                                                                                                                                                                                                                                                                                                                                                                                                                                                                                                                                                                                                                                                                                                                                                                                                                                                                                                                                                                                                                                                                                                                                                                                                                                                                                                                                                                                                                                                                                                                                                                                                                                                                                                                                                                                                                                                                                                                                                                                                                                                                                                                                                                                                                                                                                                                                                                                                                                            |
| Manuscript ID                 | bmjopen-2017-021438                                                                                                                                                                                                                                                                                                                                                                                                                                                                                                                                                                                                                                                                                                                                                                                                                                                                                                                                                                                                                                                                                                                                                                                                                                                                                                                                                                                                                                                                                                                                                                                                                                                                                                                                                                                                                                                                                                                                                                                                                                                                                                                                                                                                                                                                                                                                                                                                                                                                                                                                                                                                                                                                                                                                                        |
| Article Type:                 | Protocol                                                                                                                                                                                                                                                                                                                                                                                                                                                                                                                                                                                                                                                                                                                                                                                                                                                                                                                                                                                                                                                                                                                                                                                                                                                                                                                                                                                                                                                                                                                                                                                                                                                                                                                                                                                                                                                                                                                                                                                                                                                                                                                                                                                                                                                                                                                                                                                                                                                                                                                                                                                                                                                                                                                                                                   |
| Date Submitted by the Author: | 30-Dec-2017                                                                                                                                                                                                                                                                                                                                                                                                                                                                                                                                                                                                                                                                                                                                                                                                                                                                                                                                                                                                                                                                                                                                                                                                                                                                                                                                                                                                                                                                                                                                                                                                                                                                                                                                                                                                                                                                                                                                                                                                                                                                                                                                                                                                                                                                                                                                                                                                                                                                                                                                                                                                                                                                                                                                                                |
| Complete List of Authors:     | <p>Pak, GiDeok; International Vaccine Institute, Epidemiology<br/>         Haselbeck, Andrea; International Vaccine Institute, Epidemiology<br/>         Seo, Hyeong-Won; International Vaccine Institute<br/>         Osei, Isaac; Kumasi Centre for Collaborative Research in Tropical<br/>         Medicine, Kwame Nkrumah University of Science and Technology<br/>         (KNUST)<br/>         Amuasi, John; Kumasi Centre for Collaborative Research in Tropical<br/>         Medicine, Kwame Nkrumah University of Science and Technology<br/>         (KNUST)<br/>         Breiman, Robert; Emory University , Global Health Institute<br/>         Cruz Espinosa, Ligia Maria; International Vaccine Institute, Epidemiology<br/>         Im, Justin; International Vaccine Institute, Epidemiology<br/>         Jang, Geun-Hyeog; International Vaccine Institute, Epidemiology<br/>         Jeon, Hyonjin; International Vaccine Institute, Epidemiology<br/>         Luby, Stephen; International Centre for Diarrhoeal Disease Research,<br/>         Centre for Communicable Diseases; Stanford University,<br/>         Lunguya-Metila, Octavie; Institut National de Recherche Biomedicales;<br/>         Service de Microbiologie, Cliniques Universitaires de Kinshasa<br/>         MacWright, William; Global Health Institute, Emory University<br/>         Mogeni, Ondari; International Vaccine Institute, Epidemiology<br/>         Okeke, Iruka; University of Ibadan<br/>         Owusu-Dabo, Ellis; Kumasi Center for Collaborative Research in Tropical<br/>         Medicine; Kwame Nkrumah University of Science and Technology<br/>         Park, Jin Kyung; International Vaccine Institute<br/>         Park, SeEun; International Vaccine Institute, Epidemiology<br/>         Popoola, Femi; University of Ibadan<br/>         Seo, Hye-jin; International Vaccine Institute, Epidemiology<br/>         Soura, Abdramane ; Institut Superieur des Sciences de la Population,<br/>         University of Ouagadougou<br/>         Teferi, Mekonnen; Armauer Hansen Research Institute, ALERT Campus<br/>         Toy, Trevor; International Vaccine Institute, Epidemiology<br/>         Chon, Yun; International Vaccine Institute<br/>         Rahaniminina, Lydia; Universite d'Antananarivo<br/>         Rakotozandrindrainy, Raphael; Universite d'Antananarivo<br/>         Meyer, Christian; Institute of Tropical Medicine, Eberhard Karls<br/>         University; Faculty of Medicine, Duy Tan University<br/>         Marks, Florian ; International Vaccine Institute; The Department of<br/>         Medicine, The University of Cambridge<br/>         Panzner, Ursula; International Vaccine Institute, Epidemiology</p> |

1  
2  
3  
4  
5  
6  
7  
8  
9  
10  
11  
12  
13  
14  
15  
16  
17  
18  
19  
20  
21  
22  
23  
24  
25  
26  
27  
28  
29  
30  
31  
32  
33  
34  
35  
36  
37  
38  
39  
40  
41  
42  
43  
44  
45  
46  
47  
48  
49  
50  
51  
52  
53  
54  
55  
56  
57  
58  
59  
60

|           |                                                                                                                      |
|-----------|----------------------------------------------------------------------------------------------------------------------|
| Keywords: | health/hygiene behavior, sanitation, socio-economic, geospatial random selection, sub-Saharan Africa, HPAfrica study |
|           |                                                                                                                      |

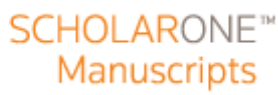

1  
2  
3  
4 **1 Assessment of health behavior and other population-based factors: a standardized study**  
5 **2 in multiple cohorts in sub-Saharan Africa**  
6 **3**

7 **4 Short Title**

8 The **Health Population Africa** (HPAfrica) study  
9 **6**

10 **7 Authors**

11 Gi-Deok Pak<sup>1#</sup>, Andrea Haselbeck<sup>1#</sup>, Hyeong-Won Seo<sup>1</sup>, Isaac Osei<sup>2</sup>, John Amuasi<sup>2</sup>, Robert Breiman<sup>3</sup>, Ligia  
12 Maria Cruz Espinoza<sup>1</sup>, Justin Im<sup>1</sup>, Geun-Hyeog Jang<sup>1</sup>, Hyon-Jin Jeon<sup>1</sup>, Stephen Luby<sup>4</sup>, Octavie Lunguya-  
13 Metila<sup>5,6</sup>, William MacWright<sup>3</sup>, Ondari D. Mogeni<sup>1</sup>, Iruka N. Okeke<sup>7</sup>, Ellis Owusu-Dabo<sup>1,2</sup>, Jin-Kyung Park<sup>1</sup>, Se  
14 Eun Park<sup>1</sup>, Oluwafemi Popoola<sup>7</sup>, Hye-Jin Seo<sup>1</sup>, Abdramane Bassiahi Soura<sup>8</sup>, Mekonnen Teferi<sup>9</sup>, Trevor Toy<sup>1</sup>,  
15 Yun Chon<sup>1</sup>, Lydia Beithine Rahaniminina<sup>10</sup>, Raphael Rakotozandrindrainy<sup>10</sup>, Christian G. Meyer<sup>11,12</sup>, Florian  
16 Marks<sup>1,13\*</sup> and Ursula Panzner<sup>1</sup>  
17 **14**

18 **15 Affiliations**

- 19 1. International Vaccine Institute, Seoul, Republic of Korea  
20 2. Kumasi Centre for Collaborative Research in Tropical Medicine, Kwame Nkrumah University of Science and  
21 Technology (KNUST), Kumasi, Ghana  
22 3. Global Health Institute, Emory University, Atlanta, United States  
23 4. Infectious Diseases and Geographic Medicine, Stanford University, Stanford, United States  
24 5. Institut National de Recherche Biomédicales, Kinshasa, Democratic Republic of Congo  
25 6. Service de Microbiologie, Cliniques Universitaires de Kinshasa, Kinshasa, Democratic Republic of the Congo  
26 7. University of Ibadan, Ibadan, Nigeria  
27 8. Institut Supérieur des Sciences de la Population, University of Ouagadougou, Ouagadougou, Burkina Faso  
28 9. Armauer Hansen Research Institute, Jimma Road, ALERT Campus, Addis Ababa, Ethiopia  
29 10. University of Antananarivo, Antananarivo, Madagascar  
30 11. Institute of Tropical Medicine, Eberhard Karls University, Tübingen, Germany  
31 12. Faculty of Medicine, Duy Tan University, Da Nang, Vietnam  
32 13. The Department of Medicine, The University of Cambridge, Cambridge, United Kingdom  
33 **30**

34 **31**  
35 # Contributed equally  
36 **33**

37 \*Corresponding Author:

38 Florian Marks, MPH, PhD, International Vaccine Institute, SNU Research Park, 1 Gwanak-ro, Gwanak-gu,  
39 Seoul, 08826, Republic of Korea, Phone: +82-2-881-1133, Fax: +82-2-881-1164, E-mail: fmarks@ivi.int  
40 **37**  
41 **38**

1  
2  
3  
4 39 **Abstract**

5  
6 40 **Introduction**

7  
8 41 The objective of the **Health Population Africa** (HPAfrica) study is to determine health behavior and  
9  
10 42 other population-based factors, including socio-economic, ethnographic, hygiene and sanitation  
11  
12 43 factors, at sites of the Severe Typhoid Fever in Africa (SETA) program. SETA aims to investigate  
13  
14 44 healthcare facility-based fever surveillance in Burkina Faso, the Democratic Republic of the Congo  
15  
16 45 (DRC), Ethiopia, Ghana, Madagascar, and Nigeria. Meaningful disease burden estimates require  
17  
18 46 adjustment for health behavior patterns, which are assumed to vary among a study population.  
19

20  
21  
22 48 **Methods and Analysis**

23  
24 49 For the minimum sample size required, the assumptions of an infinite population, a design effect, and  
25  
26 50 age- and sex-stratification are considered. In the absence of a sampling frame or household list, a  
27  
28 51 geospatial approach will be used to generate geographic random points with an Aeronautical  
29  
30 52 Reconnaissance Coverage Geographic Information System (ArcGIS) tool. Printouts of Google Earth  
31  
32 53 Pro<sup>®</sup> satellite imagery visualize these points. Data of interest will be assessed in different seasons by  
33  
34 54 applying simple, weighted-stratified sampling. An Android-based application and a web service have  
35  
36 55 been developed for electronic data capturing and synchronization with the database server in real time.  
37  
38 56 Descriptive data analyses will be performed in order to assess baseline information of each study  
39  
40 57 population and age- and sex-stratified health behavior. This will allow adjusting disease burden  
41  
42 58 estimates. In addition, multivariate analyses will be applied to look into associations between health  
43  
44 59 behavior, population-based factors, and the disease burden as determined in the SETA study.  
45

46  
47  
48 61 **Ethics and Dissemination**

49  
50 62 This protocol was first approved by the Institutional Review Board of the International Vaccine  
51  
52 63 Institute in October 2016 and undergoes annual review and renewal also by Ethics Committees of  
53  
54 64 collaborating institutions (section Ethics References). All participants are required to provide written  
55  
56

1  
2  
3  
4 65 informed consent. Findings from the HPAfrica study will be disseminated through publications in  
5  
6 66 peer-reviewed journals and collaborating institutions.  
7  
8 67

9  
10 68 **Expected Challenges**

- 11  
12 69 • Standardization in community-based multi-country/-site research requires cautiousness  
13  
14 70 considering variations in setting, language and culture.  
15  
16 71 • Current population data in study sites and their administratively-defined subareas are assumed  
17  
18 72 to be limited.  
19  
20 73 • Accessibility to households may be complicated by environmental factors.  
21  
22 74 • Electronic data collection may cause technical problems related to damage, functional failure,  
23  
24 75 or loss of devices.  
25  
26 76 • Unstable wireless internet connection may limit data teams to update the Android-based  
27  
28 77 application, communicate with study managers in real time, and synchronize collected data  
29  
30 78 with the server.  
31

32 79  
33  
34 80 **Registration:** Not required  
35

36 81  
37  
38 82 **Ethics References**

- 39  
40 83 • IVI Institutional Review Board (IRB), No. 2016-003  
41  
42 84 • Institute of Tropical Medicine Antwerp Institutional Review Board, Belgium  
43  
44 85 • Universiteit Antwerpen, Comité voor medische Ethiek, Belgium  
45  
46 86 • Ministère de la Santé du Burkina Faso – Comité d’Ethique pour la Recherche en Santé,  
47  
48 87 Burkina Faso  
49  
50 88 • Comité d’Ethique de l’Ecole de Santé Publique de l’Université de Kinshasa, Democratic  
51  
52 89 Republic of Congo  
53  
54 90 • National Research Ethics Review committee (NRERC) Ministry of Science and Technology,  
55  
56 91 Federal Democratic Republic of Ethiopia

- 1  
2  
3  
4 92 • AHRI-ALERT Ethics Review Committee (AAERC), Ethiopia  
5  
6 93 • Kwame Nkrumah University of Science and Technology, School of Medical Sciences/Komfo  
7  
8 94 Anokye Teaching Hospital, Committee on Human Research, Publication and Ethics, Ghana  
9  
10 95 • Ministère de la Santé du Repoblikan'l Madagaskar – Comité d'Ethique  
11  
12 96 • University of Ibadan/University College Hospital Ethics Committee, Ibadan, Nigeria  
13  
14 97

15  
16 98 **Keywords:** health/hygiene behavior, sanitation, socio-economic, geospatial random selection, sub-  
17  
18 99 Saharan Africa, HPAfrica study  
19  
20  
21  
22  
23  
24  
25  
26  
27  
28  
29  
30  
31  
32  
33  
34  
35  
36  
37  
38  
39  
40  
41  
42  
43  
44  
45  
46  
47  
48  
49  
50  
51  
52  
53  
54  
55  
56  
57  
58  
59  
60

## 100 **Introduction**

101 Assessment of health behavior, including healthcare utilization, is an important determinant for the  
102 generation of accurate disease burden estimates among target populations. This is particularly critical  
103 for studies which utilize observational, healthcare facility-based surveillance designs as substantial  
104 variation in health behavior patterns strongly influences disease burden estimates (1, 2). The  
105 adjustment of disease burden calculations for variation in health behavior will increase the accuracy  
106 of assessing prevalences of diseases caused by bacterial, fungal, viral, and parasitic pathogens among  
107 populations under investigation. Furthermore, the influence of a large variety of population-based  
108 factors on both health behavior and disease burden has been recognized. This includes socioeconomic  
109 factors such as education, occupation, income, the availability of household assets (3, 4),  
110 ethnical/religious and cultural factors (5, 6), but also hygiene and sanitation facilities (7-11), food  
111 handling (12-14), and animal contacts (10).

112  
113 The **Health Population Africa** (HPAfrica) study will be conducted in Burkina Faso, Democratic  
114 Republic of the Congo (DRC), Ethiopia, Ghana, Madagascar, and Nigeria. Experiences from the  
115 Typhoid Fever Surveillance in Africa Program (TSAP) will be transferred to the Severe Typhoid in  
116 Africa (SETA) program (15, 16). In this program, standardized, healthcare facility-based fever  
117 surveillance is performed at selected study sites in participating countries over a two-years period (17).  
118 SETA primarily aims to systematically collect information on the burden of severe *Salmonella*  
119 infections. Subjects living in defined catchment areas with either an acute fever episode, a fever  
120 history of  $\geq 3$  consecutive days, clinically-suspected typhoid fever or clinically-diagnosed  
121 gastrointestinal perforations due to typhoid fever will be eligible. In addition, the severity of  
122 *Salmonella* caused illnesses and the natural history of *Salmonella* infection will be recorded with  
123 further analyses on host immune responses and chronic carriage.

124

## 125 **Objectives and Outcomes**

126 The goal of the HPAfrica study is to assess the *generic* and *actual* age- and sex-stratified health



1  
2  
3  
4 127 behavior. *Generic* health behavior pertains to behavior in conditions associated with fever and other  
5  
6 128 signs and symptoms unrelated to onsets, whereas *actual* health behavior is related to onsets (Appendix  
7  
8 129 1/Supplementary file 1; Appendix 2/Supplementary file 2: Form 4 Part A, Form 5; Appendix  
9  
10 130 3/Supplementary file 3). Data will be used to adjust age- and sex-stratified incidences of infectious  
11  
12 131 pathogens in the proportion of a study population not captured by activities of HPAfrica. Data  
13  
14 132 documented for various signs and symptoms or a combination of these will be used for a gradual  
15  
16 133 classification of healthcare utilization based on disease severity.  
17  
18 134

19  
20 135 The HPAfrica study will, moreover, collect data on healthcare-associated factors such as travel  
21  
22 136 modalities, possession of a health insurance, cultural/ethnographic factors, immunization status  
23  
24 137 among children (18, 19), and the frequency of occurrence and individual perception of selected  
25  
26 138 diseases (Appendix 2/Supplementary file 2: Form 4 Part B; Appendix 3/Supplementary file 3:Form 4  
27  
28 139 Part B). Demographic data (Appendix 2/ Supplementary file 2: Form 3 Part A; Appendix  
29  
30 140 3/Supplementary file 3, Form 3 Part A) will be used for age- and sex-stratification of the population  
31  
32 141 surveyed, which is required to compute adjustment factors for disease incidences. Socio-economic  
33  
34 142 data (Appendix 2/ Supplementary file 2: Form 3 Part B; Appendix 3/ Supplementary file 3: Form 3  
35  
36 143 Part B) will be utilized to calculate wealth indices for descriptive and analytical approaches of the  
37  
38 144 populations studied. Information on hygiene and sanitation facilities (Appendix 2/ Supplementary file  
39  
40 145 2: Form 3 Part C; Appendix 3/Supplementary file 3: Form 3 Part C) may provide a better  
41  
42 146 understanding of the occurrence and frequency of pathogens identified in the populations studied.  
43  
44 147

## 45 148 **Methods**

### 46 149 **Study sites**

47  
48  
49 150 The boundaries of each site will be defined using pre-existing information set by statistical authorities  
50  
51 151 or ministries of health (Table 1). A retrospective review of records of recruitment healthcare facilities  
52  
53 152 from the past two years will support the re-definement of site limits. It is expected that this review  
54  
55 153 will reveal the residences or at least the broader administrative residential areas such as communities,  
56

1  
2  
3  
4 154 districts or villages of patients who sought healthcare for any reason. Maps and satellite imagery may  
5  
6 155 be used to better visualize patients' residences and the overall boundaries, including the  
7  
8 156 geographically or administratively defined subareas, of each site. Where boundaries cannot be clearly  
9  
10 157 defined, additional factors such as the distance to a recruitment healthcare facility may be considered.  
11  
12  
13  
14  
15  
16  
17  
18  
19  
20  
21  
22  
23  
24  
25  
26  
27  
28  
29  
30  
31  
32  
33  
34  
35  
36  
37  
38  
39  
40  
41  
42  
43  
44  
45  
46  
47  
48  
49  
50  
51  
52  
53  
54  
55  
56  
57  
58  
59  
60

For peer review only

158 **Table 1: Background data of participating study sites of target countries**

| Country      | Study site                               | Setting*    | Approximate total site population (year) | Approximate age-stratified site population [year] |                  |                  |                  | Approximate sex-stratified site population [year] |                     |
|--------------|------------------------------------------|-------------|------------------------------------------|---------------------------------------------------|------------------|------------------|------------------|---------------------------------------------------|---------------------|
|              |                                          |             |                                          | <2                                                | ≥2 to <5         | ≥5 to <15        | ≥15              | Male                                              | Female              |
| Burkina Faso | Nioko II <sup>1</sup>                    | Urban       | 19,251 (2017)                            | 2,394                                             | 1,977            | 4,657            | 10,223           | 9,321                                             | 9,930               |
|              | Polesgo <sup>1</sup>                     | Rural       | 7,897 (2017)                             | 934                                               | 893              | 1,808            | 4,262            | 3,856                                             | 4,041               |
|              | Ouagadougou <sup>1</sup>                 | Urban       | 2,532,311 (2015)                         | 421,429                                           | 693,723          | 1,417,159        | 1,271,302        | 1,261,009                                         |                     |
| DRC          | Kisantu <sup>2</sup>                     | Urban       | 291,252 (2017)                           | 48,043                                            |                  | 243,209          |                  | 91,598 <sup>#</sup>                               | 99,231 <sup>#</sup> |
| Ethiopia     | Wolayita Zone <sup>3</sup>               | Urban/Rural | 1,968,735 (2017)                         | 100,800                                           | 206,520          | 635,015          | 1,026,300        | 964,577                                           | 1,004,058           |
|              | Wolayita Sodo <sup>3</sup>               | Urban/Rural | 120,288 (2017)                           | 6,161                                             | 12,617           | 38,807           | 62,703           | 59,898                                            | 60,390              |
|              | East Shewa & Arsi Zone <sup>3</sup>      | Urban/Rural | 3,249,722                                | 104,408                                           | 422,939          | 1,016,917        | 1,705,458        | 1,671,699                                         | 1,578,023           |
|              | Adama Wenji <sup>3</sup>                 | Urban/Rural | 53,540 (2017)                            | 3,330                                             | 7,204            | 17,028           | 25,978           | 27,199                                            | 26,341              |
| Ghana        | Asante Akim North & Central <sup>4</sup> | Urban/Rural | 140,694 (2010)                           | 11,606                                            | 8,363            | 35,618           | 85,107           | 67,673                                            | 73,021              |
|              | Kumasi (Metropolis) <sup>4,5</sup>       | Urban       | 1,730,249 (2010)                         | 52,516                                            | 178,575          | 421,834          | 1,077,324        | 826,479                                           | 903,770             |
| Madagascar   | Antananarivo <sup>6</sup> (Renivohitra)  | Urban       | 1,247,025 (2009)                         | N/A <sup>§</sup>                                  | N/A <sup>§</sup> | N/A <sup>§</sup> | N/A <sup>§</sup> | N/A <sup>§</sup>                                  | N/A <sup>§</sup>    |
|              | Imerintsiatosika <sup>7</sup>            | Rural       | 44,669 (2016)                            | 3,582                                             | 4,449            | 7,610            | 29,028           | N/A <sup>§</sup>                                  | N/A <sup>§</sup>    |
| Nigeria      | Ibadan <sup>8</sup>                      | Urban       | 1,343,147 (2006)                         | 176,110                                           | 305,656          | 861,381          | 661,818          | 681,329                                           |                     |

159 Note. Table 1 shows population data that were available at the time of the HPAfrica protocol writing; population data and boundaries of geographically and/or  
 160 administratively defined study sites may be subject to changes during the course of the study. \*The classification of sites by country is based on best local knowledge; #The  
 161 sex-stratification is based on a total population of 190,829; §Population data not available at the time of protocol writing.

162  
 163 Source of population data: **Burkina Faso** (<sup>1</sup><http://www.insd.bf/n/>); <sup>2</sup><http://www.indepth-network.org/member-centres/ouagadougou-hdss>); **DRC** (<sup>2</sup>Kisantu Central Health  
 164 Zone Office report, 2016); **Ethiopia** (<sup>3</sup>Health Management Information System of the Ethiopian Ministry of Health (zonal and district health offices); **Ghana** (<sup>4</sup>Ghana  
 165 Statistical Service, 2010 Population & Housing Census, Asante Akim Central Municipality; <sup>5</sup>Ghana Statistical Service, 2010 Population & Housing Census, Summary report of  
 166 final results); **Madagascar** (<sup>6</sup>Population par Fokotany selon la declaration des Chefs Fokotany: Source: Donnee de la cartographie censitaire mises-a-jour en juillet 2009 -  
 167 INSTAT/DDSS; <sup>7</sup>University of Antananarivo); **Nigeria** (<sup>8</sup>Federal Republic of Nigeria 2006 Population and Housing Census (Table DS5), National Population Commission,  
 168 Abuja, Nigeria

169 **Sample size**

170 All available sources will be used to gather most up-to-date age- and sex-stratified population data by  
 171 study site and its administratively or geographically defined subareas. This may include latest  
 172 demographic information from a population census or a Demographic Surveillance System  
 173 (DSS)/Health and Demographic Surveillance System (HDSS). Population summary figures and  
 174 population growth factors, if available, may also be used.

175

176 The minimum number of randomly selected households to be interviewed will be calculated using the  
 177 precision-based equation (Equation-I) (20-23) assuming an infinite population and considering a  
 178 design effect (DEFF), including its accompanying assumptions:

179

180 **Equation-I: precision-based sample size calculation for an infinite population (20-23):**

181

$$n_0 = DEFF \cdot \left[ z^2_{1-\alpha/2} \cdot \frac{4 \cdot p \cdot (1-p)}{d^2} \right]$$

182  
183

Assumptions Equation-I

|                  |                                                                                                                                                                                            |
|------------------|--------------------------------------------------------------------------------------------------------------------------------------------------------------------------------------------|
| $n_0$            | Minimum number of households to be interviewed in a study area assuming an infinite population                                                                                             |
| DEFF             | Design effect; set at 1.5                                                                                                                                                                  |
| $z_{1-\alpha/2}$ | Normal deviation corresponding to a 95% confidence interval (1.96 for alpha of 0.05)                                                                                                       |
| d                | Precision (acceptable error); point estimation; set at 0.2                                                                                                                                 |
| p                | Proportion of the study population expected to visit a recruitment healthcare facility for conditions associated with fever and other signs and symptoms (proportion captured); set at 0.2 |
| 1-p              | Proportion of the study population expected to not visit a recruitment healthcare facility for conditions associated with fever and other signs and symptoms (proportion not captured)     |

184

185 The design effect is an adjustment factor for natural clustering of health behavior among household  
 186 members (21). It is arbitrarily set at 1.5, depending on the household size, as no exact estimates are  
 187 available (24, 25). A proportion p of 0.2 may be assumed if no other estimates are available or p may  
 188 be based on experiences during the TSAP study: Madagascar, Isotry: p=0.01, Burkina Faso, Polesgo:  
 189 p=0.9 (26). Combining all assumptions into Equation-I will result in a total minimum number ( $n_0$ ) of  
 190 92 household interviews at each site.

191

192 In addition,  $n_0$  will be accounted for the age- and sex-distribution of a study population reflected by  $\hat{p}$ ,

193 the assumed minimum proportion of stratification per age group (<5 years, ≥5 to <15 years, ≥15  
 194 years). Factor  $\hat{p}$  may be arbitrarily set at 0.2 or may be based on previous experiences: Ethiopia,  
 195 Butajira:  $\hat{p}=0.09$ , Burkina Faso, Polesgo:  $\hat{p}=0.23$  (26). Applying  $\hat{p}$  to Equation-I for a binomial  
 196 distribution, including its accompanying assumptions, will result in the age-stratified minimum  
 197 number of household interviews ( $\bar{n}_0$ ) (Equation-II):

199 **Equation-II: precision-based sample size calculation for an infinite population considering age-**  
 200 **stratification:**

$$\bar{n}_0 = \left( DEFF \cdot \left[ z^2_{1-\alpha/2} \cdot \frac{4 \cdot p \cdot (1-p)}{d^2} \right] \right) / \hat{p}$$

Assumptions Equation-II

|                  |                                                                                                                                                                                            |
|------------------|--------------------------------------------------------------------------------------------------------------------------------------------------------------------------------------------|
| $\bar{n}_0$      | Minimum number of households to be interviewed in the study area assuming an infinite population and age-stratification                                                                    |
| DEFF             | Design effect; set at 1.5                                                                                                                                                                  |
| $z_{1-\alpha/2}$ | Normal deviation corresponding to a 95% confidence interval (1.96 for alpha of 0.05)                                                                                                       |
| D                | Precision (acceptable error); point estimation; set at 0.2                                                                                                                                 |
| p                | Proportion of the study population expected to visit a recruitment healthcare facility for conditions associated with fever and other signs and symptoms (proportion captured); set at 0.2 |
| 1-p              | Proportion of the study population expected to not visit a recruitment healthcare facility for conditions associated with fever and other signs and symptoms (proportion not captured)     |
| $\hat{p}$        | The minimum proportion of stratification per age group; set at 0.2                                                                                                                         |

203  
 204 Health behavior will be assessed twice at the same households if possible or at alternative households  
 205 in case the study population is instable due to migration and/or high birth/death rates. Additional  
 206 households, assumed to be 20% on average, (Table 2) may be added to account for possible loss to  
 207 follow-up between the two assessments. Eventually,  $\bar{n}_0$  will be divided by the number of subareas  
 208 and weighted proportionally to the population size by applying weighted-stratified sampling [16].

209  
 210 **Table 2: Sample sizes considering infinite population and age-stratification applying**  
 211 **Equation-II:**

| Proportion (p) | Total minimum number of households without DEFF | Total minimum number of households ( $n_0$ ) with DEFF=1.5 | Total minimum number of households ( $\bar{n}_0$ ) with DEFF=1.5 and $\hat{p}=0.2$ | $\bar{n}_0$ adjusted for loss to follow-up |
|----------------|-------------------------------------------------|------------------------------------------------------------|------------------------------------------------------------------------------------|--------------------------------------------|
| 0.1            | 35                                              | 52                                                         | 259                                                                                | 311                                        |
| 0.2            | 62                                              | 92                                                         | 461                                                                                | 553                                        |
| 0.3            | 81                                              | 121                                                        | 605                                                                                | 726                                        |
| 0.4            | 92                                              | 138                                                        | 691                                                                                | 830                                        |
| 0.5            | 96                                              | 144                                                        | 720                                                                                | 864                                        |

|     |    |     |     |     |
|-----|----|-----|-----|-----|
| 0.6 | 92 | 138 | 691 | 830 |
| 0.7 | 81 | 121 | 605 | 726 |
| 0.8 | 62 | 92  | 461 | 553 |
| 0.9 | 35 | 52  | 259 | 311 |

212  
213  
214  
215  
216  
217  
218  
219  
220  
221

#### Abbreviations

$p$ =Proportion of the study population expected to visit a recruitment healthcare facility for conditions associated with fever and other signs and symptoms (proportion captured); set at 0.2

DEFF=Design effect; set at 1.5

$n_0$ =Total minimum number of households to be interviewed in a study area assuming an infinite population

$\bar{n}_0$ =Total minimum number of households to be interviewed in the study area assuming an infinite population

and age-stratification

$\hat{p}$ =Minimum proportion of stratification per age group; set at 0.2

#### 222 **Sampling**

223 If comprehensive up-to-date sampling frames or household lists exist (through DSS/HDSS or  
224 available census), computerized random selection will be done using SAS (Statistical Analysis System,  
225 version 9.4, SAS Institute, Cary, NC) applying serial simple random selection without replacement. If  
226 no sampling frame exists, it can be constructed using satellite imagery or aerial maps in order to  
227 enumerate all structures (26), rastering (27), or grid cells (28, 29).

228  
229 We apply a geospatial technique for the creation of points generated by the ArcGIS (Aeronautical  
230 Reconnaissance Coverage Geographic Information System; Redlands, CA, USA, version 10.2)  
231 random point generation tool with the application of simple, weighted-stratified sampling (30, 31).  
232 The tool randomly places specified numbers of points inside the features of a polygon that  
233 corresponds to an administrative subarea. X- and Y-coordinates define one point until the calculated  
234 sample size is reached. ArcGIS-generated random points are converted into an image file of the  
235 Keyhole Markup Language (KML) or Keyhole Markup language Zipped (KMZ) format and imported  
236 into Google Earth Pro<sup>®</sup> (Google Inc., Mountain View, CA, USA, version 6.2.2.6613). A unique  
237 numerical identifier and horizontal geographic coordinates are assigned to each point. The location of  
238 each point is verified on an up-to-date Google Earth Pro<sup>®</sup> satellite imagery. Appendix  
239 4/Supplementary file 4 illustrates our approach when utilizing examples from Ghana (Appendix  
240 4/Supplementary file 5) and Madagascar (Appendix 4/Supplementary file 6).

241

242 Geographic points labeled with identifiers are pictured on poster-size (60x60 to 60x90 cm) printouts  
 243 of Google Earth Pro<sup>®</sup> satellite imagery with high resolution up to the structure level. The satellite  
 244 maps help to locate selected points on the ground. Global Positioning System (GPS) receivers  
 245 (Garmin-eTrex; Garmin Ltd., Lenexa, KS, USA) allow to verify the locations. The receivers will be  
 246 positioned closely to a located point, in a static position and an open area to assure barrier-free reading.  
 247 In case of refusal, absence of the respondent or locating of a non-residential point, a residential point  
 248 closest to the right or left side will be visited instead (32).

249

### 250 **Frequency of data collection**

251 Residential points will be visited twice for household interviews during the SETA program to assess  
 252 seasonal influences on health behavior (33-37). Interviews will take place in differing seasons – one at  
 253 the end of the dry season or at least one month after its beginning and one towards at end of the wet  
 254 season or at least one month after its beginning (Table 3). Currently, the HPAfrica study is ongoing in  
 255 Burkina Faso, Ghana and Madagascar and is anticipated to be continued in the remaining countries  
 256 during the upcoming months.

257

### 258 **Table 3: Seasonality in participating countries**

| Country      | Period of Wet Season               | Period of Dry Season         |
|--------------|------------------------------------|------------------------------|
| Burkina Faso | May/June - September/October       | October/November - April/May |
| DRC          | November - March                   | April - October              |
| Ethiopia     | June - August                      | October - May                |
| Ghana        | April – July, September - November | December - March             |
| Madagascar   | November - March/April             | April/May - October          |
| Nigeria      | May - August                       | October - April              |

259 Note. The seasonality by country is based on best local knowledge.

260

### 261 **Inclusion and exclusion criteria**

262 Household members of all ages and both sexes living in a study area at the day of the interview will  
 263 be eligible for inclusion. A household will be excluded if the designated respondent declines  
 264 participation or is unavailable after three consecutive visits. All visitors and individuals with unknown

1  
2  
3  
4 265 residence or residence outside the study area will be excluded.  
5  
6 266

7  
8 267 For the purpose of this investigation, a household is defined as a person or a group of related or  
9  
10 268 unrelated persons living in the same dwelling unit, acknowledging one adult individual as the  
11  
12 269 household head, sharing the same housekeeping arrangements, and independently procuring food and  
13  
14 270 other essential for living (26).  
15

16 271

17 272 The interview will exclusively be held with the respondent, who is an adult household member at the  
18  
19 273 country-specific legal age of majority. This person may be identified as decision-maker by members  
20  
21 274 of the same household and serves as a proxy for an entire household (15). Further relevant definitions  
22  
23 275 are explained in Appendix 1/Supplementary file 1 and Appendix 3/Supplementary file 3.  
24

25 276

#### 27 277 **Data collection**

28  
29 278 On-site interviewers will be trained on locating the geographic points, identification of respondents,  
30  
31 279 informed consent procedures with emphasis on voluntary participation, and the deployment of  
32  
33 280 standardized, pre-tested study forms (Appendix 2/Supplementary file 2 and Appendix  
34  
35 281 3/Supplementary file 3) prior to the initiation of HPAfrica. Informed consent and study forms will be  
36  
37 282 translated into the country-specific official language and back-translated into English to account for  
38  
39 283 translation errors and to make corrections, where required.  
40

41 284

#### 43 285 **Data management**

44  
45 286 Management of data will depend on the mode of collection, which will be primarily electronic rather  
46  
47 287 than paper-based. Past experiences showed following disadvantages of paper-based data collection: a  
48  
49 288 high probability of errors while filling study forms, and the need of subsequent data digitalization,  
50  
51 289 which is an extra, labor- and time-intensive and error-prone step. Electronic data capturing using a  
52  
53 290 smartphone or tablet application minimizes these limiting factors to the data quality.  
54

55 291



1  
2  
3  
4 292 There may be a pilot period during which both paper-based and paperless data will be collected prior  
5  
6 293 to full implementation of electronic data collection. The latter utilizes the Android application “HPA  
7  
8 294 Collect” (Google Android 5.0.1 9API 23; available at  
9  
10 295 <https://play.google.com/store/apps/details?id=anint.ivi.hpa>) and the platform “HPA Web” (CSS,  
11  
12 296 JavaScript and JSP; available at <http://hpa.ivi.int/>), which are both accompanied by a variable  
13  
14 297 dictionary containing codes, meaning and properties of variables in at least English and French. Stable  
15  
16 298 wireless internet connectivity using default browsers is required to assure a contemporaneous,  
17  
18 299 attributable, original and accurate synchronization of data between “HPA Collect” and “HPA Web”.  
19  
20 300 Access to both “HPA Collect” and “HPA Web” is password-protected. Appendix 5/Supplementary file  
21  
22 301 7 displays the system diagram, which has the following features:  
23  
24 302

#### 303 **Structure or features of “HPA Collect”**

- 304 • **User management:** A simple user interface provides different privileges for users to enter,  
305 edit (except for study labels), and export or transfer data. It establishes an audit trail that  
306 records when users enter data into the server.
- 307 • **Data input:** Data are entered directly into the smartphone or tablet device. Entry fields  
308 limit possible answers to plausible ones only by offering different input methods:
  - 309 ▪ Edit Text: free text
  - 310 ▪ Radio group/Multi click button: single choice
  - 311 ▪ Check box: multiple choice
  - 312 ▪ Date and time picker: entering date and time
  - 313 ▪ Spinner: drop-down button

314 Additional features allow the surveyor to save time by transferring data collected at an  
315 earlier stage to data fields required at a later stage of the interview by performing  
316 plausibility checks for diverse data input fields, and by easily recognizing skip patterns.  
317 Error checks, missing data notifications, code errors, and logical errors are also included.

- 1  
2  
3  
4 318 • **Data view:** Raw, originally entered data can be seen in the same, human- and machine-  
5  
6 319 readable format, namely the JSON format, as they will be transferred to a database server  
7  
8 320 (Windows, MySQL). Additional functions like “clear” to clear all records, “reset” to  
9  
10 321 return back to the main data entry page, and “search” to search for a study label are  
11  
12 322 available.
- 13  
14 323 • **Settings:** The ability to switch the system language between English and French is  
15  
16 324 provided.
- 17  
18 325 • **About:** The currently installed version of “HPA Collect” is displayed.  
19  
20 326

### 21 22 Structure or features of “HPA Web”

- 23  
24 328 • **Home:** An introduction to the platform is given and a tutorial in French and English will  
25  
26 329 be accessible.
- 27  
28 330 • **Form View:** The study forms are displayed separately showing every question and the  
29  
30 331 corresponding input data as defined variables.
- 31  
32 332 • **Form Edit:** This feature allows the correction of the uploaded data. It is only accessible  
33  
34 333 to data managers in each participating country and at IVI.
- 35  
36 334 • **Search:** Specific study labels given to each study form can be filtered.
- 37  
38 335 • **Variable dictionary:** The variable dictionary can be downloaded.
- 39  
40 336 • **Export:** Data can be converted from the server into a transferrable excel file.
- 41  
42 337 • **Contact Us:** Quick and easy correspondence between users and the data manager at IVI  
43  
44 338 is given.  
45  
46 339

47  
48 340 Data will be reviewed by key study personnel on a day-to-day basis and checked for consistency and  
49  
50 341 accuracy prior to data analysis. The quality of data may be checked by selecting a subset of 5% for  
51  
52 342 validation against the original, paper-based data if possible. Names of household members will not be  
53  
54 343 linked to study forms of HPAfrica and will not be recorded in the database in order to ensure  
55  
56 344 confidentiality. Access to the database will be restricted to authorized study personnel only and data

1  
2  
3  
4 345 will be kept in a locked, protected location. Periodic interim backup files and at least three final  
5  
6 346 backup files of the database stored in a secure, locked place will avoid loss of data and ensure data  
7  
8 347 safety. All data will be stored for a minimum of five years.  
9

10 348

11  
12 349 **Data analysis**

13  
14 350 Descriptive analyses such as absolute and relative frequencies, medians or arithmetic means will be  
15  
16 351 conducted to construct a contemporary baseline population description.  
17

18 352

19  
20 353 Basic analyses will include the calculation of age- and sex-stratified proportions of *generic* and *actual*  
21  
22 354 health behavior, including healthcare utilization, for various signs and symptoms or combinations of  
23  
24 355 signs and symptoms. These analyses will allow for a gradual classification based on disease severity,  
25  
26 356 including 95% confidence interval. Health behavior will be adjusted for an assumed natural clustering  
27  
28 357 effect among household members. Most up-to-date stratified population data by site and demographic  
29  
30 358 data derived from HPAfrica will be used to generate the proportions for the adjustment of incidence  
31  
32 359 calculations.  
33

34 360

35  
36 361 Socio-economic information collected will be used to construct wealth indices of studied populations  
37  
38 362 by applying factor analyses based on the principal component method. In addition, bi- and  
39  
40 363 multivariate regression analyses will be performed to identify potential confounding factors or effect  
41  
42 364 modification using factor scores.  
43

44 365

45  
46 366 Bi- and multivariate regression analyses will be carried out using factor scores for the assessment  
47  
48 367 of the following variables:

- 49  
50 368
- 51 369 • Socioeconomic data such as education, income (38), health insurance, housing, and  
52 household assets
  - 53 370 • Hygiene and sanitation such as toilet access, water sources, food handling, waste disposal,  
54 and animal contacts  
55 371

- 1  
2  
3  
4 372 • Health behavior: *actual* (age- and sex-stratified, severity, frequency), *generic* (age- and  
5  
6 373 sex-stratified, severity, rating by choice)  
7  
8 374 • Travel modalities to health facilities, age-stratified  
9  
10 375 • Seasonality related to hygiene & sanitation, health behavior, travel modalities  
11  
12 376 • Cultural/religious/ethnographic factors, age-stratified  
13  
14 377 • Vaccination status among children (18, 19)  
15  
16 378 • Knowledge and perception of common diseases  
17  
18 379

19  
20 380 **Ethical considerations**

21  
22 381 There are no direct benefits for enrolled households and their members. Indirect benefits for the  
23  
24 382 general population at sites will be the updated information on the burden of communicable diseases,  
25  
26 383 including factors influencing disease transmission and infection. The HPAfrica study generates  
27  
28 384 evidence to support decision-makers on the introduction of appropriate measures for disease  
29  
30 385 prevention and control.  
31

32 386  
33  
34 387 This protocol underwent reviews by IVI's Institutional Review Board and site-specific local boards as  
35  
36 388 shown in the section "Ethics References". During and after the HPAfrica study, all data of enrolled  
37  
38 389 subjects will be kept in strict confidence and will not be disclosed to a third party by any member of  
39  
40 390 the research team. Password protection of devices and the database is used for strict confidence. All  
41  
42 391 paper-based data (consent forms) will be kept in a secure, locked location. Confidential information  
43  
44 392 stored on computers and paper-based data sources will only be made available to co-investigators and  
45  
46 393 IVI staff directly involved in study activities of HPAfrica.  
47

48 394

49  
50 395 **Dissemination**

51  
52 396 We plan to disseminate the study findings by reporting descriptive as well as analytic and stratified  
53  
54 397 data through publications in peer-reviewed journals and collaborating institutions.  
55

56 398

399 **Authors' contributions**

400 GDP, JKP and UP conceptualized the initial study concept of the HPAfrica study. HWS and GHJ  
401 developed the tools "HPA Collect" and "HPA Web" for electronic data collection with primary  
402 support of UP and AH. IO and JA supported the development and finalizing of the data collection  
403 tools "HPA Collect" and "HPA Web". LBR and RR supported the development and finalization of the  
404 HPAfrica study forms. The appendices were conceptualized by GDP, JKP, YC, JI, TT, AH and UP.  
405 IO, JA, RB, LMCE, JI, HJJ, SL, OLM, WMW, ODM, INO, EOD, SP, OP, HJS, ABS, MT, TT, LBR  
406 and RR supported the further development of the initial study protocol and appendices. FM, YC and  
407 CGM participated in the finalization of the study protocol, including appendices. AH wrote the first  
408 draft of the manuscript. GDP, HWS, IO, JA, RB, LMCE, JI, GHJ, HJJ, SL, OLM, WMW, ODM, INO,  
409 EOD, JKP, SP, OP, HJS, ABS, MT, TT, YC, LBR, RR, CGM and FM critically reviewed and revised  
410 the manuscript draft. GDP, AH, HWS, IO, JA, RB, LMCE, JI, GHJ, HJJ, SL, OLM, WMW, ODM,  
411 INO, EOD, JKP, SP, OP, HJS, ABS, MT, TT, YC, LBR, RR, CGM, FM and UP agreed and approved  
412 the final manuscript as submitted.

413

414 **Acknowledgement**

415 We thank David Kauderer for the support and advice in computer engineering, the support in  
416 proofreading French study materials from Dr. Paul M. Tshiminyi, and the administrative support from  
417 Soo Young Kwon and Ji Hyun Han.

418

419 **Funding statement**

420 This study was supported by the Bill & Melinda Gates Foundation (OPP1127988). The funders had  
421 no role in study design, data collection, data analysis, data interpretation, or writing of the report; the  
422 conclusions and findings presented are those of the authors and do not necessarily reflect positions or  
423 policies of the Bill & Melinda Gates Foundation or the International Vaccine Institute (IVI). The IVI  
424 acknowledges its donors, including the Republic of Korea and the Swedish International Development  
425 Cooperation Agency (Sida).

1  
2  
3  
4 426

5  
6 427 **Competing interests**

7  
8 428 The authors declare that they have no competing interests.

9  
10 429

11  
12 430 **Abbreviations**

13  
14 431 JSON: JavaScript Objective Notation; CSS: Cascading Style Sheets; JSP: Java Server Page; SQL:

15  
16 432 Structured Query Language

17  
18 433

19  
20 434 **Appendices**

21  
22 435 **Appendix 1** (Supplementary file 1)

23  
24 436 Definitions/Terminology (English)

25  
26 437 **Appendix 2** (Supplementary file 2)

27  
28 438 Study Forms (English)

29  
30 439 Form 1: Record of household visits

31  
32 440 Form 2: Consent Form

33  
34 441 Form 3: General household information

35  
36 442 Part A: Demographic data/General household information

37  
38 443 Part B: Socio-economic data

39  
40 444 Part C: Hygiene and sanitation

41  
42 445 Form 4: Assessment of age- and sex-stratified *generic* healthcare utilization

43  
44 446 Part A: Assessment of *generic* healthcare utilization

45  
46 447 Part B: Healthcare-associated factors/Vaccination/Disease perception

47  
48 448 Form 5: Assessment of age- and sex-stratified *actual* healthcare utilization

49  
50 449 **Appendix 3** (Supplementary file 3)

51  
52 450 Protocol, Definitions/Terminology and Study Forms (French)

53  
54 451 **Appendix 4** (Supplementary file 4)

55  
56 452 Geospatial random selection (examples of Ghana (Supplementary file 5) and Madagascar

453 (Supplementary file 6))

454 **Appendix 5** (Supplementary file 7)

455 System diagram of the data collection and data management: the Android application “HPA

456 Collect” and the platform “HPA Web”.

457

## 458 References

- 459 1. Bigogo G, Audi A, Aura B, Aol G, Breiman RF, Feikin DR. Health-seeking patterns among  
460 participants of population-based morbidity surveillance in rural western Kenya: implications  
461 for calculating disease rates. *Int J Infect Dis.* 2010;14(11):e967-73.
- 462 2. Jordan HT, Prapasiri P, Areerat P, Anand S, Clague B, Sutthirattana S, et al. A comparison  
463 of population-based pneumonia surveillance and health-seeking behavior in two provinces in  
464 rural Thailand. *Int J Infect Dis.* 2009;13(3):355-61.
- 465 3. Saeed BI, Xicang Z, Yawson AE, Nguah SB, Nsawah-Nuamah NN. Impact of  
466 socioeconomic status and medical conditions on health and healthcare utilization among  
467 aging Ghanaians. *BMC public health.* 2015;15:276.
- 468 4. Thoa NT, Thanh NX, Chuc NT, Lindholm L. The impact of economic growth on health care  
469 utilization: a longitudinal study in rural Vietnam. *International journal for equity in health.*  
470 2013;12:19.
- 471 5. Okafor IP, Sekoni AO, Ezeiru SS, Ugboaja JO, Inem V. Orthodox versus unorthodox care: A  
472 qualitative study on where rural women seek healthcare during pregnancy and childbirth in  
473 Southwest, Nigeria. *Malawi medical journal : the journal of Medical Association of Malawi.*  
474 2014;26(2):45-9.
- 475 6. Farag TH, Kotloff KL, Levine MM, Onwuchekwa U, Van Eijk AM, Doh S, et al. Seeking  
476 care for pediatric diarrheal illness from traditional healers in Bamako, Mali. *The American  
477 journal of tropical medicine and hygiene.* 2013;89(1 Suppl):21-8.
- 478 7. Akullian A, Ng'eno E, Matheson AI, Cosmas L, Macharia D, Fields B, et al. Environmental  
479 Transmission of Typhoid Fever in an Urban Slum. *PLoS Negl Trop Dis.*  
480 2015;9(12):e0004212.
- 481 8. Steele AD, Hay Burgess DC, Diaz Z, Carey ME, Zaidi AK. Challenges and Opportunities  
482 for Typhoid Fever Control: A Call for Coordinated Action. *Clinical infectious diseases : an  
483 official publication of the Infectious Diseases Society of America.* 2016;62 Suppl 1:S4-8.
- 484 9. Tran HH, Bjune G, Nguyen BM, Rottingen JA, Grais RF, Guerin PJ. Risk factors associated  
485 with typhoid fever in Son La province, northern Vietnam. *Transactions of the Royal Society  
486 of Tropical Medicine and Hygiene.* 2005;99(11):819-26.
- 487 10. Rweyemamu M, Kambarage D, Karimuribo E, Wambura P, Matee M, Kayembe JM, et al.  
488 Development of a One Health National Capacity in Africa : the Southern African Centre for  
489 Infectious Disease Surveillance (SACIDS) One Health Virtual Centre Model. *Current topics  
490 in microbiology and immunology.* 2013;366:73-91.
- 491 11. Slayton RB, Date KA, Mintz ED. Vaccination for typhoid fever in sub-Saharan Africa.  
492 *Human vaccines & immunotherapeutics.* 2013;9(4):903-6.
- 493 12. Sharma PK, Ramakrishnan R, Hutin Y, Manickam P, Gupte MD. Risk factors for typhoid in  
494 Darjeeling, West Bengal, India: evidence for practical action. *Tropical medicine &  
495 international health : TM & IH.* 2009;14(6):696-702.
- 496 13. Eguale T, Gebreyes WA, Asrat D, Alemayehu H, Gunn JS, Engidawork E. Non-typhoidal  
497 *Salmonella* serotypes, antimicrobial resistance and co-infection with parasites among  
498 patients with diarrhea and other gastrointestinal complaints in Addis Ababa, Ethiopia. *BMC  
499 infectious diseases.* 2015;15:497.

- 1  
2  
3  
4 500 14. Paudyal N, Anihouvi V, Hounhouigan J, Matsheka MI, Sekwati-Monang B, Amoa-Awua W,  
5 501 et al. Prevalence of foodborne pathogens in food from selected African countries - A meta-  
6 502 analysis. *International journal of food microbiology*. 2017;249:35-43.
- 7 503 15. Panzner U, Pak GD, Aaby P, Adu-Sarkodie Y, Ali M, Aseffa A, et al. Utilization of  
8 504 Healthcare in the Typhoid Fever Surveillance in Africa Program. *Clinical infectious diseases*  
9 505 : an official publication of the Infectious Diseases Society of America. 2016;62 Suppl 1:S56-  
10 506 68.
- 11 507 16. von Kalckreuth V, Konings F, Aaby P, Adu-Sarkodie Y, Ali M, Aseffa A, et al. The Typhoid  
12 508 Fever Surveillance in Africa Program (TSAP): Clinical, Diagnostic, and Epidemiological  
13 509 Methodologies. *Clinical infectious diseases* : an official publication of the Infectious  
14 510 Diseases Society of America. 2016;62 Suppl 1:S9-S16.
- 15 511 17. Park SE, Toy T, Adu-Sarkodie Y, Baker S, Breiman RF, Cruz Espinoza LM, et al. The  
16 512 Severe Typhoid in Africa Program: a multicentre population-based surveillance program  
17 513 with a nested case-control and cohort study. under submission.
- 18 514 18. WHO. WHO vaccine-preventable diseases: monitoring system. 2017 global summary 2017  
19 515 [Available from: [http://apps.who.int/immunization\\_monitoring/globalsummary/schedules/](http://apps.who.int/immunization_monitoring/globalsummary/schedules/).  
20 516 19. WHO recommendations for routine immunization - summary tables [Internet]. 2017 [cited 7  
21 517 December 2017]. Available from:  
22 518 [http://www.who.int/immunization/policy/immunization\\_tables/en/](http://www.who.int/immunization/policy/immunization_tables/en/).
- 23 519 20. Fleiss JL, Levin, B., Paik, M.C. *Statistical Methods for Rates and Proportions*. 3rd ed. New  
24 520 York: John. Wiley & Sons; 2003.
- 25 521 21. Henderson RH, Sundaresan T. Cluster sampling to assess immunization coverage: a review  
26 522 of experience with a simplified sampling method. *Bulletin of the World Health Organization*.  
27 523 1982;60(2):253-60.
- 28 524 22. Henderson RH, Davis H, Eddins DL, Foegen WH. Assessment of vaccination coverage,  
29 525 vaccination scar rates, and smallpox scarring in five areas of West Africa. *Bulletin of the*  
30 526 *World Health Organization*. 1973;48(2):183-94.
- 31 527 23. Newcombe RG. Two-sided confidence intervals for the single proportion: comparison of  
32 528 seven methods. *Statistics in medicine*. 1998;17(8):857-72.
- 33 529 24. Katz J, Zeger SL. Estimation of design effects in cluster surveys. *Ann Epidemiol*.  
34 530 1994;4(4):295-301.
- 35 531 25. Bostoen K, Chalabi Z. Optimization of household survey sampling without sample frames.  
36 532 *Int J Epidemiol*. 2006;35(3):751-5.
- 37 533 26. Panzner U, Ali M, Meyer CG, Baker S, Deerin JF, Eltayeb MA, et al. Geospatial sampling  
38 534 frames for household-based studies: Lessons learned from a multi-country surveillance  
39 535 network in Senegal, South Africa and Sudan. 2017 (submitted).
- 40 536 27. Lister AJ, Scott CT. Use of space-filling curves to select sample locations in natural resource  
41 537 monitoring studies. *Environ Monit Assess*. 2009;149(1-4):71-80.
- 42 538 28. Keating J, MacIntyre K, Mbogo C, Githeko A, Regens JL, Swalm C, et al. A geographic  
43 539 sampling strategy for studying relationships between human activity and malaria vectors in  
44 540 urban Africa. *Am J Trop Med Hyg*. 2003;68(3):357-65.
- 45 541 29. Keating J, Macintyre K, Mbogo CM, Githure JI, Beier JC. Characterization of potential  
46 542 larval habitats for Anopheles mosquitoes in relation to urban land-use in Malindi, Kenya. *Int*  
47 543 *J Health Geogr*. 2004;3(1):9.
- 48 544 30. Lohr SL. *Sampling: Design and Analysis*. 2nd edition ed. Pacific Grove, CA: Duxbury Press;  
49 545 2010.
- 50 546 31. ArcGIS. [Available from: [http://pro.arcgis.com/en/pro-app/tool-reference/data-  
51 547 management/create-random-points.htm](http://pro.arcgis.com/en/pro-app/tool-reference/data-management/create-random-points.htm).
- 52 548 32. Kondo MC, Bream KD, Barg FK, Branas CC. A random spatial sampling method in a rural  
53 549 developing nation. *BMC public health*. 2014;14:338.
- 54 550 33. Kasper MR, Blair PJ, Touch S, Sokhal B, Yasuda CY, Williams M, et al. Infectious  
55 551 etiologies of acute febrile illness among patients seeking health care in south-central  
56 552 Cambodia. *The American journal of tropical medicine and hygiene*. 2012;86(2):246-53.



- 1  
2  
3  
4 553 34. Dewan AM, Corner R, Hashizume M, Ongee ET. Typhoid Fever and its association with  
5 554 environmental factors in the Dhaka Metropolitan Area of Bangladesh: a spatial and time-  
6 555 series approach. PLoS Negl Trop Dis. 2013;7(1):e1998.  
7 556 35. Naeem Khan M, Shafee M, Hussain K, Samad A, Arif Awan M, Manan A, et al. Typhoid  
8 557 fever in paediatric patients in Quetta, Balochistan, Pakistan. Pakistan journal of medical  
9 558 sciences. 2013;29(4):929-32.  
10 559 36. Crump JA, Youssef FG, Luby SP, Wasfy MO, Rangel JM, Taalat M, et al. Estimating the  
11 560 incidence of typhoid fever and other febrile illnesses in developing countries. Emerging  
12 561 infectious diseases. 2003;9(5):539-44.  
13 562 37. Osei-Tutu B, Anto F. Trends of reported foodborne diseases at the Ridge Hospital, Accra,  
14 563 Ghana: a retrospective review of routine data from 2009-2013. BMC infectious diseases.  
15 564 2016;16:139.  
16 565 38. (ILO) ILO. International Standard Classification of Occupations ISCO-08, 2012 [Available  
17 566 from: [http://www.ilo.org/wcmsp5/groups/public/---dgreports/---dcomm/---publ/documents/publication/wcms\\_172572.pdf](http://www.ilo.org/wcmsp5/groups/public/---dgreports/---dcomm/---publ/documents/publication/wcms_172572.pdf).  
18 567

19 568  
20  
21  
22  
23  
24  
25  
26  
27  
28  
29  
30  
31  
32  
33  
34  
35  
36  
37  
38  
39  
40  
41  
42  
43  
44  
45  
46  
47  
48  
49  
50  
51  
52  
53  
54  
55  
56  
57  
58  
59  
60

**Appendix 1/Supplementary file 1: Definitions/Terminology (English)**

| <b>A</b>                                       |                                                                                                                                                                                                                                                                                                                                                                                                                                                                                                                                                                                                                                    |
|------------------------------------------------|------------------------------------------------------------------------------------------------------------------------------------------------------------------------------------------------------------------------------------------------------------------------------------------------------------------------------------------------------------------------------------------------------------------------------------------------------------------------------------------------------------------------------------------------------------------------------------------------------------------------------------|
| Abdominal pain/<br>Intestinal pain             | Pain (acute/short-lived or chronic/long-lived) that occurs anywhere between the chest and the groin (often referred to as the stomach region/belly).                                                                                                                                                                                                                                                                                                                                                                                                                                                                               |
| Aches/Pain                                     | A condition of having continuous/prolonged dull pain in a part of the body; the physical feeling, suffering, or discomfort caused by an illness or injury.                                                                                                                                                                                                                                                                                                                                                                                                                                                                         |
| <b>B</b>                                       |                                                                                                                                                                                                                                                                                                                                                                                                                                                                                                                                                                                                                                    |
| Bleeding<br>(internal/external)/<br>Blood loss | The condition of losing blood from the vascular system, either internally into the body (internal bleeding) or externally through a natural orifice or break in the skin (external bleeding); blood escaping from an injured blood vessel.                                                                                                                                                                                                                                                                                                                                                                                         |
| Blood loss/<br>Bleeding                        | The condition of losing blood from the vascular system, either internally into the body (internal bleeding) or externally through a natural orifice or break in the skin (external bleeding); blood escaping from an injured blood vessel.                                                                                                                                                                                                                                                                                                                                                                                         |
| Blood pressure<br>disorders                    | A high/low blood pressure or a blood pressure that shows excessive fluctuation.                                                                                                                                                                                                                                                                                                                                                                                                                                                                                                                                                    |
| <b>C</b>                                       |                                                                                                                                                                                                                                                                                                                                                                                                                                                                                                                                                                                                                                    |
| Chills/Shivering                               | The sensation of coldness that could be accompanied by shivering or shaking of the body and pallor of the skin.                                                                                                                                                                                                                                                                                                                                                                                                                                                                                                                    |
| Cholera                                        | An infectious, sometimes fatal disease of the small intestine caused by the bacterium <i>Vibrio cholerae</i> ; it is spread via the fecal-oral route from the ingestion of contaminated water and food and causes chills, shivering, severe watery diarrhea, vomiting, and dehydration.                                                                                                                                                                                                                                                                                                                                            |
| Confusion/Dizziness/<br>Unconsciousness        | The state of being bewildered or unclear in mind; an abnormal state of response to stimuli in the environment; faint, wooziness, weakness, unsteadiness or a tendency to fall; the interruption of the awareness of oneself and one's surroundings.                                                                                                                                                                                                                                                                                                                                                                                |
| Convulsion                                     | The sudden, violent, irregular movement of a limb/part of the body or of the entire body which is caused by involuntary contraction of muscles.                                                                                                                                                                                                                                                                                                                                                                                                                                                                                    |
| Cough                                          | The condition of expelling air from the lungs suddenly/rapidly and with a harsh noise; often involuntarily in order to clear the lung airways of fluids/mucus/other material.                                                                                                                                                                                                                                                                                                                                                                                                                                                      |
| <b>D</b>                                       |                                                                                                                                                                                                                                                                                                                                                                                                                                                                                                                                                                                                                                    |
| Dehydration                                    | A condition of excessive loss of water/moisture from the body.                                                                                                                                                                                                                                                                                                                                                                                                                                                                                                                                                                     |
| Diarrhea                                       | A condition of passing feces from the body very frequently and in a liquid rather than solid form.                                                                                                                                                                                                                                                                                                                                                                                                                                                                                                                                 |
| Diphtheria                                     | A highly contagious, sometimes fatal disease caused by the bacterium <i>Corynebacterium diphtheriae</i> . It is spread from person-to-person, through the air or contaminated objects and affects the upper respiratory tract. Common symptoms are sore throat, swollen glands/ lymph nodes, malaise, fever/chills, a membranous substance/thick gray material that forms in the throat/tonsils and makes it difficult to breathe/ rapid breathing ("barking cough") and swallow. A form of diphtheria that involves the skin, eyes, or genitals is also reported and is characterized by pain, redness, and swelling of the skin. |
| Dizziness/Confusion/<br>Unconsciousness        | The state of being bewildered or unclear in mind; an abnormal state of response to stimuli in the environment; faint, wooziness, weakness, unsteadiness or a tendency to fall; the interruption of the awareness of oneself and one's surroundings.                                                                                                                                                                                                                                                                                                                                                                                |
| <b>E</b>                                       |                                                                                                                                                                                                                                                                                                                                                                                                                                                                                                                                                                                                                                    |
| Edema/Swelling                                 | The excess collection of a watery fluid/swelling in the cavities or tissues of the body; it's commonly noticed in the hands/arms/feet/legs; volume increase of tissue.                                                                                                                                                                                                                                                                                                                                                                                                                                                             |
| Education - formal                             | A systematic, organized education model that is structured and administered according to a given set of laws and norms; formal education institutions are administratively, physically and curricularly organized and require a minimum classroom attendance from students; it involves intermediate and final assessments in order to advance to the next learning stage; it confers degrees and diplomas pursuant to a quite strict set of regulations.                                                                                                                                                                          |
| <b>F</b>                                       |                                                                                                                                                                                                                                                                                                                                                                                                                                                                                                                                                                                                                                    |
| Fatigue/Malaise/                               | The state of feeling tired, exhausted, or weak; a general feeling of discomfort,                                                                                                                                                                                                                                                                                                                                                                                                                                                                                                                                                   |

|    |                                      |                                                                                                                                                                                                                                                                                                                                                                                                                                                                                                                                                                                                                                                                                                                                                                     |
|----|--------------------------------------|---------------------------------------------------------------------------------------------------------------------------------------------------------------------------------------------------------------------------------------------------------------------------------------------------------------------------------------------------------------------------------------------------------------------------------------------------------------------------------------------------------------------------------------------------------------------------------------------------------------------------------------------------------------------------------------------------------------------------------------------------------------------|
| 1  | Weakness                             | uneasiness, unhealthiness, or unhappiness.                                                                                                                                                                                                                                                                                                                                                                                                                                                                                                                                                                                                                                                                                                                          |
| 2  | Fever, any                           | An abnormally high body temperature (usually above 38°C).                                                                                                                                                                                                                                                                                                                                                                                                                                                                                                                                                                                                                                                                                                           |
| 3  | Fever <3 days                        | An abnormally high body temperature (usually above 38°C) that appears continuously for less than 3 days.                                                                                                                                                                                                                                                                                                                                                                                                                                                                                                                                                                                                                                                            |
| 4  | Fever >3 days                        | An abnormally high body temperature (usually above 38°C) that lasts longer than 3 days and appears continuously.                                                                                                                                                                                                                                                                                                                                                                                                                                                                                                                                                                                                                                                    |
| 5  |                                      |                                                                                                                                                                                                                                                                                                                                                                                                                                                                                                                                                                                                                                                                                                                                                                     |
| 6  | <b>G</b>                             |                                                                                                                                                                                                                                                                                                                                                                                                                                                                                                                                                                                                                                                                                                                                                                     |
| 7  | <b>H</b>                             |                                                                                                                                                                                                                                                                                                                                                                                                                                                                                                                                                                                                                                                                                                                                                                     |
| 8  |                                      |                                                                                                                                                                                                                                                                                                                                                                                                                                                                                                                                                                                                                                                                                                                                                                     |
| 9  | Headache                             | Any kind of pain in any region of the head.                                                                                                                                                                                                                                                                                                                                                                                                                                                                                                                                                                                                                                                                                                                         |
| 10 | Healthcare - actual                  | Healthcare that is related to specific sign/symptom-associated disease onsets or disease onset dates.                                                                                                                                                                                                                                                                                                                                                                                                                                                                                                                                                                                                                                                               |
| 11 | Healthcare - general                 | Healthcare that is unrelated to specific sign/symptom-associated disease onsets or disease onset dates.                                                                                                                                                                                                                                                                                                                                                                                                                                                                                                                                                                                                                                                             |
| 12 | Healthcare facility                  | Places or institutions where healthcare is provided; including hospitals, clinics, healthcare centers, health posts, and specialized care centers.                                                                                                                                                                                                                                                                                                                                                                                                                                                                                                                                                                                                                  |
| 13 | <i>Haemophilus influenzae</i> type B | A bacterium that causes a range of illnesses and is spread by droplets through coughs and sneezing, and occurs primarily among children <5years of age; common signs are fever, headache, and stiff neck up to sepsis. It can cause ear infections, cellulitis (soft tissue infection), arthritis, upper respiratory infections, pneumonia, meningitis (potential brain damage) and epiglottitis (with airway obstructions).                                                                                                                                                                                                                                                                                                                                        |
| 14 | Heart disorders                      | Any disorder that affects or is caused by the heart; conditions that involve narrowed/blocked blood vessels that can lead to heart attack, chest pain, or stroke; condition that may affect one's heart muscle, valves, rhythm, or blood pressure.                                                                                                                                                                                                                                                                                                                                                                                                                                                                                                                  |
| 15 | Hepatitis B                          | An infectious disease caused by the hepatitis B virus (HBV) that affects the liver (acute/chronic liver infection; may result in liver failure, cancer, or cirrhosis). The virus is spread from person-to-person through blood, semen, or other bodily fluids. Common symptoms are fever, malaise/weakness/fatigue, loss of appetite, nausea/vomiting, abdominal discomfort/pain, dark-colored urine, joint pain and jaundice.                                                                                                                                                                                                                                                                                                                                      |
| 16 | Hepatitis E                          | An infectious disease caused by the hepatitis E virus (HEV) that affects the liver (only acute liver infection; may result in acute liver failure). The virus is spread via the fecal-oral route through the ingestion of contaminated food and water, infected animals (zoonotically) and blood. Common symptoms are fever, malaise, loss of appetite, diarrhea, nausea, abdominal discomfort, dark-colored urine, joint pain and jaundice.                                                                                                                                                                                                                                                                                                                        |
| 17 | HIV/AIDS                             | An infectious disease caused by the human immunodeficiency virus (HIV) that affects/damages the immune system and results in the acquired immunodeficiency syndrome (AIDS), a chronic, potentially life-threatening condition; it is transmitted through infectious body fluids such as blood, semen, and other bodily fluids. Common symptoms of an acute/early infection are fever, fatigue, headache, aches/joint pain, rash, sore throat, swollen glands/lymph nodes, diarrhea, weight loss, oral yeast infection and shingles. The untreated disease progresses to AIDS; symptoms caused by the severely damaged immune system are night sweats, recurring fever, chronic diarrhea, lesions on tongue and in the mouth, fatigue, weight loss, and skin rashes. |
| 18 | Household                            | A person or a group of related or unrelated persons that live together in the same dwelling unit, that acknowledge one male or female adult as the head of the household, that share the same housekeeping arrangements, that are considered to constitute one unit, and that provide themselves with food or other essentials for living. A household may be located in a single housing unit (single-story building) or in a set of collective living quarters (multi-story building).                                                                                                                                                                                                                                                                            |
| 19 | <b>I</b>                             |                                                                                                                                                                                                                                                                                                                                                                                                                                                                                                                                                                                                                                                                                                                                                                     |
| 20 | Income/Wage                          | Money or another form of payment that someone receives periodically in exchange for providing a good or service. It is usually received from a job/occupation.                                                                                                                                                                                                                                                                                                                                                                                                                                                                                                                                                                                                      |
| 21 | Influenza                            | An infectious, highly contagious disease of the respiratory tract that is caused by flu viruses; it is spread from person-to-person via infected saliva droplets and contaminated objects. Common symptoms are fever, aches in muscles/arms/legs,                                                                                                                                                                                                                                                                                                                                                                                                                                                                                                                   |

|                                    |                                                                                                                                                                                                                                                                                                                                                                                                                                                                                                                                                                                                                                                           |
|------------------------------------|-----------------------------------------------------------------------------------------------------------------------------------------------------------------------------------------------------------------------------------------------------------------------------------------------------------------------------------------------------------------------------------------------------------------------------------------------------------------------------------------------------------------------------------------------------------------------------------------------------------------------------------------------------------|
|                                    | chills/sweats, headache, fatigue/weakness, runny nose/nasal congestion, sneezing, sore throat and dry persistent cough.                                                                                                                                                                                                                                                                                                                                                                                                                                                                                                                                   |
| Intestinal pain/<br>Abdominal pain | Pain (acute/short-lived or chronic/long-lived) that occurs anywhere between the chest and the groin (often referred to as the stomach region/belly).                                                                                                                                                                                                                                                                                                                                                                                                                                                                                                      |
| <b>J</b>                           |                                                                                                                                                                                                                                                                                                                                                                                                                                                                                                                                                                                                                                                           |
| Jaundice                           | A condition of yellowing of the skin/whites of the eyes.                                                                                                                                                                                                                                                                                                                                                                                                                                                                                                                                                                                                  |
| <b>K/L</b>                         |                                                                                                                                                                                                                                                                                                                                                                                                                                                                                                                                                                                                                                                           |
| <b>M</b>                           |                                                                                                                                                                                                                                                                                                                                                                                                                                                                                                                                                                                                                                                           |
| Malaise/Fatigue/<br>Weakness       | The state of feeling tired, exhausted, or weak; a general feeling of discomfort, uneasiness, unhealthiness, or unhappiness.                                                                                                                                                                                                                                                                                                                                                                                                                                                                                                                               |
| Malaria                            | An infectious, sometimes fatal disease caused by a parasite ( <i>Plasmodium spp.</i> ) that is transmitted primarily by the bite of infected mosquitoes; infection may also spread from mother-to-child prenatally or during delivery, or through contact with contaminated blood. Common symptoms are recurrent attacks of chills, sweating, high fever, headache, vomiting and diarrhea.                                                                                                                                                                                                                                                                |
| Measles                            | An infectious, sometimes fatal disease of the respiratory tract (nose/throat) that is caused by a virus that affects mainly children <5years of age; it is spread from person-to-person via infected saliva droplets and contaminated objects. Common symptoms are fever, dry cough, runny nose, inflamed eyes, sore throat, large flat spots on the skin, and white spots in the mouth and on the cheek.                                                                                                                                                                                                                                                 |
| Meningitis                         | A viral/bacterial/fungal, sometimes life-threatening infectious inflammation of the membranes (meninges) surrounding the brain and spinal cord; it is spread from person-to-person via infected saliva droplets and contaminated objects. Common symptoms are high fever, severe headache, nausea/vomiting, confusion, seizures, loss of appetite and thirst, fatigues, sensitivity to light, skin rash and stiff neck.                                                                                                                                                                                                                                   |
| Mumps                              | A viral infectious disease caused by the mumps virus that affects mainly the parotid glands that are situated below and in front of the ears; it is spread from person-to-person via infected saliva droplets and contaminated objects. Common symptoms are fever, swelling of one/both parotid glands, headache, muscle aches, weakness/fatigue, loss of appetite and pain while shewing/swallowing; a known complication may be hearing loss.                                                                                                                                                                                                           |
| <b>N</b>                           |                                                                                                                                                                                                                                                                                                                                                                                                                                                                                                                                                                                                                                                           |
| Nausea/Vomiting                    | A feeling of sickness in the stomach with an inclination to vomit; a condition of ejecting part or all of the contents of the stomach, primarily through the mouth.                                                                                                                                                                                                                                                                                                                                                                                                                                                                                       |
| Neighbor                           | A person (related or unrelated) living next door to a household; a neighbor does not live together with members of a household (next door) in the same dwelling unit, does not share the same housekeeping arrangements, food, or other living essentials with members of a household (next door), and does not constitute one unit with members of a household (next door).                                                                                                                                                                                                                                                                              |
| <b>O</b>                           |                                                                                                                                                                                                                                                                                                                                                                                                                                                                                                                                                                                                                                                           |
| Occupation                         | A job, or means of earning a wage/living; often requires the mastery of a complex set of knowledge, tasks, duties and skills acquired through formal education and/or practical experience.                                                                                                                                                                                                                                                                                                                                                                                                                                                               |
| <b>P</b>                           |                                                                                                                                                                                                                                                                                                                                                                                                                                                                                                                                                                                                                                                           |
| Pain/Aches                         | A condition of having continuous/prolonged dull pain in a part of the body; the physical feeling, suffering, or discomfort caused by an illness or injury.                                                                                                                                                                                                                                                                                                                                                                                                                                                                                                |
| Pertussis                          | Pertussis, also known as whooping cough, is a highly contagious bacterial disease. Symptoms similar to a common cold like runny nose, fever and cough are followed by weeks of sever coughing and a high-pitched whooping sound or gasping when a diseased person breathes in; severe coughing may even be followed by vomiting, breaking of ribs, or extreme fatigue. Infected very young and old people may have little or no cough, or they may have periods of interrupted breathing during which they do not breath are all. Pertussis is transmitted by the bacterium <i>Bordetella pertussis</i> through coughs and sneezes of an infected person. |
| Pharmacy                           | A place where medicines (prescription or nonprescription) are prepared, preserved, compounded and dispensed.                                                                                                                                                                                                                                                                                                                                                                                                                                                                                                                                              |

|                                                   |                                                                                                                                                                                                                                                                                                                                                                                                                                                                                                            |
|---------------------------------------------------|------------------------------------------------------------------------------------------------------------------------------------------------------------------------------------------------------------------------------------------------------------------------------------------------------------------------------------------------------------------------------------------------------------------------------------------------------------------------------------------------------------|
| Physician                                         | A person skilled/trained in healing; a person educated, clinically experienced, and licensed to practice medicine.                                                                                                                                                                                                                                                                                                                                                                                         |
| Pneumococcus                                      | A bacterial infection caused by the bacterium <i>Streptococcus pneumoniae</i> ; a sometimes fatal inflammation of the lungs that often affects immunocompromised people; it is spread from person-to-person via infected saliva droplets and contaminated objects. Common symptoms are fever, chills, cough (with phlegm/pus), chest pain, difficulty in breathing/shortness of breath, fatigue, nausea/vomiting and diarrhea; rare symptoms are sepsis, pleural effusion, and empyema.                    |
| Polio                                             | A viral, highly contagious, sometimes fatal infectious disease caused by the poliovirus; in its most severe form causes paralysis and difficulties in breathing; it is transmitted via the fecal-oral route through ingestion of contaminated water and food, and from person-to-person contact. Common symptoms are fever, sore throat, headache, vomiting, fatigue, back pain/neck pain/stiffness, muscle weakness/aches, meningitis, loss of reflexes, and loose/floppy limbs.                          |
| <b>Q</b>                                          |                                                                                                                                                                                                                                                                                                                                                                                                                                                                                                            |
| <b>R</b>                                          |                                                                                                                                                                                                                                                                                                                                                                                                                                                                                                            |
| Rapid breathing/<br>Shortness of breath           | The condition of abnormally fast breathing; a rate of >20 breaths per minute for adults, >30 breaths per minute for children and >45 breaths per minute for babies.                                                                                                                                                                                                                                                                                                                                        |
| Respondent                                        | An adult (at the country-specific legal age of majority) household member who is a decision-maker for the entire household within the study site; thus, this adult person serves as a proxy for all household members. This person may be identified by other members of the same household as the person who is primarily involved in the daily healthcare of household members.                                                                                                                          |
| Rotavirus                                         | A viral infectious disease caused by rotavirus that results predominantly in diarrhea among children <5years of age; it spreads through the fecal-oral route from person-to-person contact and contaminated objects. Common symptoms are watery diarrhea, fever, vomiting, abdominal pain and dehydration.                                                                                                                                                                                                 |
| Rubella                                           | A contagious, viral infectious disease caused by the rubella virus; known by its distinctive red rash; it is spread from person-to-person via infected saliva droplets), from mother-to-child prenatally via blood, and contaminated objects. Common symptoms are mild fever, headache, stuffy/runny nose, inflamed red eyes, enlarged tender lymph nodes at the base of the skull/back of the neck/behind the ears, joint pain and a fine pink rash that moves from the face to the trunk, arms and legs. |
| Runny nose                                        | The condition when the nose (nasal and adjacent tissues and blood vessels) produces extra mucus/excess drainage.                                                                                                                                                                                                                                                                                                                                                                                           |
| <b>S</b>                                          |                                                                                                                                                                                                                                                                                                                                                                                                                                                                                                            |
| Self-treatment                                    | The medication of oneself or treatment of one's own disease or condition without medical supervision or prescription.                                                                                                                                                                                                                                                                                                                                                                                      |
| Severe breathing/<br>Difficulties in<br>breathing | The condition of abnormal breathing that may be accompanied by wheezing, chest pain, chest in-drawing, stridor, swelling in the chest, or cough for instance.                                                                                                                                                                                                                                                                                                                                              |
| Shivering/Chills                                  | The sensation of coldness that could be accompanied by shivering or shaking of the body and pallor of the skin.                                                                                                                                                                                                                                                                                                                                                                                            |
| Shortness of breath/<br>Rapid breathing           | The condition of abnormally fast and deep breathing; a rate of >20 breaths per minute for adults, >30 breaths per minute for children and >45 breaths per minute for babies.                                                                                                                                                                                                                                                                                                                               |
| Sneezing                                          | The condition of suddenly forcing air out through nose and mouth with a usual loud noise.                                                                                                                                                                                                                                                                                                                                                                                                                  |
| Swelling/Edema                                    | A condition of an excess collection of a watery fluid/swelling in the cavities or tissues of the body; it's commonly noticed in the hands/arms/feet/legs; volume increase of tissue.                                                                                                                                                                                                                                                                                                                       |
| <b>T</b>                                          |                                                                                                                                                                                                                                                                                                                                                                                                                                                                                                            |
| Tetanus                                           | Tetanus is an infection characterized by muscle spasms which commonly begins in the jaw and progresses to the rest of the body. The spasms usually last for a few minutes only and occur frequently during 3-4 weeks of the illness but can be so                                                                                                                                                                                                                                                          |

|                                         |                                                                                                                                                                                                                                                                                                                                                                                                                                                                                                                                                                                              |
|-----------------------------------------|----------------------------------------------------------------------------------------------------------------------------------------------------------------------------------------------------------------------------------------------------------------------------------------------------------------------------------------------------------------------------------------------------------------------------------------------------------------------------------------------------------------------------------------------------------------------------------------------|
|                                         | severe that they may cause bone fractures or death when they affect the respiratory muscles. Tetanus may be characterized by further symptoms like fever, sweating, headache, difficulties in swallowing, high blood pressure, and an increased heart rate. The disease is caused by an infection with the bacterium <i>Clostridium tetani</i> that is found in soil, saliva, dust and manure. The bacterium enters through a skin injury (e.g. cut, puncture wound) by a contaminated object. It produces toxins that interfere with muscle contractions that result in the typical spasms. |
| Traditional healer                      | A person that aims to maintain health as well as to prevent, diagnose, and improve or treat illnesses by using a sum of knowledge, skills and practices based on theories, beliefs and experiences.                                                                                                                                                                                                                                                                                                                                                                                          |
| Tuberculosis                            | A contagious, potentially serious infectious disease caused by the bacteria <i>Mycobacterium tuberculosis</i> ; primarily affects the lungs, but can also affect the kidneys and spine/brain; it is transmitted from person-to-person via infected saliva droplets. Common symptoms of active tuberculosis are cough (with or without blood), chest pain, weight loss, fatigue, fever, night sweats, chills and loss of appetite.                                                                                                                                                            |
| Typhoid fever                           | A bacterial, potentially life-threatening infectious disease caused by <i>Salmonella typhi</i> ; it is transmitted via the fecal-oral route through contaminated food and water, or from person-to-person contact. Common symptoms are high fever, headache, abdominal pain, constipation/diarrhea, and rash. Serious complications (i.e. perforation of the gut) are reported.                                                                                                                                                                                                              |
| <b>U</b>                                |                                                                                                                                                                                                                                                                                                                                                                                                                                                                                                                                                                                              |
| Unconsciousness/<br>Dizziness/Confusion | The state of being bewildered or unclear in mind; an abnormal state of response to stimuli in the environment; faint, wooziness, weakness, unsteadiness or a tendency to fall; the interruption of the awareness of oneself and one's surroundings.                                                                                                                                                                                                                                                                                                                                          |
| <b>V</b>                                |                                                                                                                                                                                                                                                                                                                                                                                                                                                                                                                                                                                              |
| Varicella                               | A viral, highly contagious infectious disease, commonly known as chickenpox, that primarily affects children and is caused by the varicella-zoster virus; it is spread from person-to-person by contact with infected blisters or saliva droplets. Common symptoms are mild fever, headache, backache, loss of appetite, and vesicular skin eruptions/rash/red spots on the back and chest accompanied by severe itching.                                                                                                                                                                    |
| Visitor                                 | A person (related or unrelated) who comes to a household to spend some time with household members; a visitor does not live together with household members in the same dwelling unit, does not share the same housekeeping arrangements, food, or other living essentials with household members, and does not constitute one unit with household members.                                                                                                                                                                                                                                  |
| Vomiting/Nausea                         | A feeling of sickness in the stomach with an inclination to vomit; a condition of ejecting part or all of the contents of the stomach, primarily through the mouth.                                                                                                                                                                                                                                                                                                                                                                                                                          |
| <b>W</b>                                |                                                                                                                                                                                                                                                                                                                                                                                                                                                                                                                                                                                              |
| Weakness/Malaise/<br>Fatigue            | The state of feeling tired, exhausted, or weak; a general feeling of discomfort, uneasiness, unhealthiness, or unhappiness.                                                                                                                                                                                                                                                                                                                                                                                                                                                                  |
| Weight loss                             | The (voluntary or involuntary) decrease in body weight.                                                                                                                                                                                                                                                                                                                                                                                                                                                                                                                                      |
| Witness                                 | A person who is an adult (at the country-specific legal age of majority), who is independent of the study, who cannot be unfairly influenced by study staff, who attends the informed consent process if the subject or subject's legally acceptable representative is illiterate, and who reads (literate) the informed consent form and any other written information supplied to the subject.                                                                                                                                                                                             |
| <b>X/Y/Z</b>                            |                                                                                                                                                                                                                                                                                                                                                                                                                                                                                                                                                                                              |
| Yellow fever                            | An acute infectious, human pathogenic, viral disease that is marked by the sudden onset of symptoms like fever, chills, loss of appetite, nausea, muscle pain, and headache, that typically resolve within a few days or are followed by more serious symptoms such as jaundice, high fever and hemorrhage. The disease is caused by a virus of the genus <i>Flavivirus</i> and is transmitted by the bite of an infected mosquito.                                                                                                                                                          |

Site \_\_\_\_ Subarea \_\_\_\_ House number \_\_\_\_

Interviewer ID \_\_\_\_

**Appendix 2/Supplementary file 2: Study forms (English)****FORM 1 – RECORD OF HOUSEHOLD VISITS****Instructions to the interviewer**

- Complete "Form 1 – RECORD OF HOUSEHOLD VISITS" for every household visited.
- Complete "Home/Respondent/Completed" once all survey parts have been completed; if not all data have been collected at the initial and/or a consecutive visit (max. 3 visits), schedule a revisit.
- Attempt 1: complete the status of the household visit using given options; for "Not Home", "Home/Non-Respondent" and "Home/Respondent/Unavailable" schedule a revisit; for "Home/Respondent/Refusal" state the reason for refusal and visit a replacement household to the nearest on the right or left side of this household; for ~~and~~ "Non-existing/Non-residential" skip this household and visit a replacement household to the nearest on the right or left side of this household instead.
- Attempt 2: complete the status of the household visit using given options; for "Not Home", "Home/Non-Respondent" and "Home/Respondent/Unavailable" schedule a revisit.
- Attempt 3: complete the status of the household visit using given options; for "Not Home", "Home/Non-Respondent", "Home/Respondent/Unavailable" skip this household and visit a replacement household to the nearest on the right or left side of this household instead.
- "Site" and "Subarea" must be entered each as a 3-digit, "House number" as a 4-digit, and "Interviewer ID" as a 2-digit code (use lists individually prepared for each site to obtain codes); enter "Date" in the format DD/MM/YY and "Time" in the format HH:MM and circle AM or PM. "Study label" must be a combination of a 3-digit "Site" code, a 3-digit "Subarea" code and a 4-digit "House number" code; the "Interviewer ID" must be entered as a 3-digit code.

|                                |                                   |                                                                                                                                                                                                                                                                                                                                                                                                |                     |
|--------------------------------|-----------------------------------|------------------------------------------------------------------------------------------------------------------------------------------------------------------------------------------------------------------------------------------------------------------------------------------------------------------------------------------------------------------------------------------------|---------------------|
| <b>Attempt 1</b>               | Date ____/____/____<br>(DD/MM/YY) | Time ____/____<br>AM/PM                                                                                                                                                                                                                                                                                                                                                                        | Interviewer ID ____ |
| STATUS                         |                                   | Tick one                                                                                                                                                                                                                                                                                                                                                                                       |                     |
| 1=Not home                     | <input type="radio"/>             | ➔ Schedule revisit (Date/Time)                                                                                                                                                                                                                                                                                                                                                                 |                     |
| 2=Home/Non-Respondent          | <input type="radio"/>             | ➔ Schedule revisit (Date/Time)                                                                                                                                                                                                                                                                                                                                                                 |                     |
| 3=Home/Respondent/Unavailable  | <input type="radio"/>             | ➔ Schedule revisit (Date/Time)                                                                                                                                                                                                                                                                                                                                                                 |                     |
| 4=Home/Respondent/Completed    | <input type="radio"/>             |                                                                                                                                                                                                                                                                                                                                                                                                |                     |
| 5=Home/Respondent/Refusal      | <input type="radio"/>             | Record the reason(s) for refusal; tick all that applies<br><input type="radio"/> 1=No time to answer questions<br><input type="radio"/> 2=Don't want to participate/answer questions<br><input type="radio"/> 3=Other _____<br><input type="radio"/> 98=No response <input type="radio"/> 99=Don't know<br>➔ Visit a replacement household to the nearest right or left side of this household |                     |
| 6=Non-existing/Non-residential | <input type="radio"/>             | ➔ Visit a replacement household to the nearest right or left side of this household                                                                                                                                                                                                                                                                                                            |                     |
| <b>Attempt 2</b>               | Date ____/____/____<br>(DD/MM/YY) | Time ____/____<br>AM/PM                                                                                                                                                                                                                                                                                                                                                                        | Interviewer ID ____ |
| STATUS                         |                                   | Tick one                                                                                                                                                                                                                                                                                                                                                                                       |                     |
| 1=Not home                     | <input type="radio"/>             | ➔ Schedule revisit (Date/Time)                                                                                                                                                                                                                                                                                                                                                                 |                     |
| 2=Home/Non-Respondent          | <input type="radio"/>             | ➔ Schedule revisit (Date/Time)                                                                                                                                                                                                                                                                                                                                                                 |                     |
| 3=Home/Respondent/Unavailable  | <input type="radio"/>             | ➔ Schedule revisit (Date/Time)                                                                                                                                                                                                                                                                                                                                                                 |                     |

Site \_\_\_\_\_ Subarea \_\_\_\_\_ House number \_\_\_\_\_ Interviewer ID \_\_\_\_\_

|                                |                                   |                         |                                                                                                                                                                                                                                                                                                                                                                                                |
|--------------------------------|-----------------------------------|-------------------------|------------------------------------------------------------------------------------------------------------------------------------------------------------------------------------------------------------------------------------------------------------------------------------------------------------------------------------------------------------------------------------------------|
| 4=Home/Respondent/Completed    |                                   | <input type="radio"/>   |                                                                                                                                                                                                                                                                                                                                                                                                |
| 5=Home/Respondent/Refusal      |                                   | <input type="radio"/>   | Record the reason(s) for refusal; tick all that applies<br><input type="radio"/> 1=No time to answer questions<br><input type="radio"/> 2=Don't want to participate/answer questions<br><input type="radio"/> 3=Other _____<br><input type="radio"/> 98=No response <input type="radio"/> 99=Don't know<br>➔ Visit a replacement household to the nearest right or left side of this household |
| 6=Non-existing/Non-residential |                                   | <input type="radio"/>   | ➔ Visit a replacement household to the nearest right or left side of this household                                                                                                                                                                                                                                                                                                            |
| <b>Attempt 3</b>               | Date ____/____/____<br>(DD/MM/YY) | Time ____/____<br>AM/PM | Interviewer ID ____                                                                                                                                                                                                                                                                                                                                                                            |
| STATUS                         |                                   | Tick one                |                                                                                                                                                                                                                                                                                                                                                                                                |
| 1=Not home                     |                                   | <input type="radio"/>   | ➔ Visit a replacement household to the nearest right or left side of this household                                                                                                                                                                                                                                                                                                            |
| 2=Home/Non-Respondent          |                                   | <input type="radio"/>   | ➔ Visit a replacement household to the nearest right or left side of this household                                                                                                                                                                                                                                                                                                            |
| 3=Home/Respondent/Unavailable  |                                   | <input type="radio"/>   | ➔ Visit a replacement household to the nearest right or left side of this household                                                                                                                                                                                                                                                                                                            |
| 4=Home/Respondent/Completed    |                                   | <input type="radio"/>   |                                                                                                                                                                                                                                                                                                                                                                                                |
| 5=Home/Respondent/Refusal      |                                   | <input type="radio"/>   | Record the reason(s) for refusal; tick all that applies<br><input type="radio"/> 1=No time to answer questions<br><input type="radio"/> 2=Don't want to participate/answer questions<br><input type="radio"/> 3=Other _____<br><input type="radio"/> 98=No response <input type="radio"/> 99=Don't know<br>➔ Visit a replacement household to the nearest right or left side of this household |
| 6=Non-existing/Non-residential |                                   | <input type="radio"/>   | ➔ Visit a replacement household to the nearest right or left side of this household                                                                                                                                                                                                                                                                                                            |



Site \_\_\_\_ Subarea \_\_\_\_ House number \_\_\_\_

Interviewer ID \_\_\_\_

## FORM 2 – CONSENT FORM

Healthcare assessment in [add study site and -country]

### Instructions to the interviewer

- Read "Form 2 – CONSENT FORM" to the respondent/ask the respondent to carefully read through "Form 2 – CONSENT FORM" if preferred.
- The respondent as defined for this investigation is an adult (at the country-specific legal age of majority) household member and decision-maker with respect to daily healthcare/healthcare utilization for the entire household and its members; it must not be e.g. a neighbour or a visitor.
- Assure that the respondent has fully understood the purpose, procedures, risks and benefits of this study prior to obtaining the respondent's consent to participate.
- The respondent must sign "Form 2 – CONSENT FORM"; if the respondent is unable to sign/illiterate, a thumbprint will serve in place of a signature and a study-independent literate adult witness (e.g. member of same household/neighbour) will sign "Form 2 – CONSENT FORM".
- Collect data about all household members regardless of whether all household members are present at the time of the interview; collecting and recording data only about individuals present at the time of the interview will result in biased data.
- Complete "Form 2 – CONSENT FORM" once for every household consented/enrolled in the study.
- Explain to the respondent that it is anticipated to revisit every household during a 2-year period; the study team will obtain a new consent for participation during each visit.
- "Site" and "Subarea" must be entered each as a 3-digit, "House number" as a 4-digit, "Interviewer ID" as a 2-digit code (use lists individually prepared for each site to obtain codes), and "Date" in the format DD/MM/YYYY. "Study label" must be a combination of a 3-digit "Site" code, a 3-digit "Subarea" code and a 4-digit "House number" code; the "Interviewer ID" must be entered as a 3-digit code.

### Study principal- and co-investigators

[add names of study principal- and co-investigators and respective affiliations]

### Introduction

The International Vaccine Institute (IVI) and the [add affiliation(s) of local investigators] are working together to look into health problems and healthcare seeking behaviour in your community [add study site and -country], including the socio-economic status, hygiene and sanitation behaviour, and the vaccination status among children. We would like to better understand where you, your family and your neighbours seek healthcare in case of medical conditions associated with fever/hot body and other signs & symptoms. This information will help us to find out how common fever-related and other conditions are, provide a better picture of influencing factors involved in disease transmission and infection, and to find ways to prevent and treat illnesses in your community. You, the primary decision-maker for daily healthcare/healthcare utilization for this household and its members, are invited to participate because you live in the area where we are conducting this study. This consent form will be read by you/to you and you should take your time to make your decision to accept or decline the participation in the study. Please ask members of the study team to explain any word(s) or information that you do not understand. Further information about this study, including its potential risks, benefits and inconveniences will be explained subsequently. After the study has been fully explained to you and if you agree to participate, you will be asked to sign this consent form on behalf of all household members. If you are unable to sign the form, we will ask you to provide your thumbprint, and a study-independent adult person (member of your household/neighbour) will sign the form as a witness. We will give you a signed and dated copy of the consent form.

### Purpose

The purpose of this study is to look into health problems and utilization of healthcare in your community [add study site and -country], including the socio-economic status and hygiene and sanitation behaviour. We aim to better understand where you, your family and your neighbours seek healthcare for conditions associated with fever/hot body or other signs & symptoms. This information will help better estimate the burden of illnesses common in your community, and to identify ways to introduce measures to prevent and treat them.

Site \_\_\_\_\_ Subarea \_\_\_\_\_ House number \_\_\_\_\_

Interviewer ID \_\_\_\_\_

### Procedures

We will visit about [add number for study site and -country] households in total in [add study site and -country] and will ask the same questions to each household. Your household was chosen for this study simply by chance. If you agree to participate, we will ask you on behalf of all household members a few questions about your household such as the initials, sex and age of each member. We would like to know some information related to the education and occupation of the household head, and income, possession of household items, the housing itself as well as hygiene and sanitation in the context of personal hygiene, food preparation and handling, water sources and handling, waste disposal, handling of farm and domestic animals as well as farming of this household. We will also ask where members of your household get help if anyone is sick due to fever-related and other conditions and about factors that may influence healthcare seeking behaviour of household members (i.e. travel modalities, availability of health insurance, cultural/ethnographic factors) besides the immunization status of children of this house and the perception of some diseases. Finally, we will measure the geographic location of your house. There are no right or wrong answers. You are free to choose which questions to answer. All in all, it should take about 30-45 minutes to answer all questions. The interview may take a bit longer if there are many members in this household. Also, we will visit your household two times in different seasons (once during the dry season and once towards the end of the rainy season) during the overall study period of about two years to collect data as described in this paragraph of the consent form.

### Participation

You, the primary decision-maker for daily healthcare/healthcare utilization for this household and its members, and members of your household are free to choose to accept or decline to be part of the study. If you do not want to participate, that is ok. If you want to stop your participation at any time, that is ok, and there will be no harm to you or members of your household. So, participation in this study is voluntary, and you are free to refuse to participate in the study or you can withdraw your consent at any time without giving reasons and this will not involve any penalty.

### Risks & Benefits

There are no direct risks for participating in this study. Asking questions about your household may make you or household members feel uncomfortable. Study teams may help providing information on established community healthcare resources for participants that express distress after completing the questions. You can refuse to answer any question at any time. You may take a break or stop participating in this study at any time. There are no direct benefits for being in this study. During visits of your household, our study teams may identify members of your household that should seek healthcare for fever-associated conditions and others. Hence, they may help providing information on established healthcare resources in your community. Indirect benefits are that all information collected will provide exact information on health problems and healthcare utilization for various conditions, including vaccination for young children, the socio-economic status as well as hygiene and sanitation behaviour in your community. This will help to provide a better picture of influencing factors involved in disease transmission and infection, and to estimate the burden of common diseases as well as to find ways to prevent and treat those in your community.

### Costs & Compensation

There are no costs for participants of this study. You and anyone from your household will not be compensated for your participation.

### Confidentiality

All study records and all collected information that identify you and members of your household will be kept confidential. All paper-based files will be locked safely and computerized files will be password-protected; all data files (paper-based/computerized) will be stored for a minimum of five years; these files will be accessible to authorized few study staff only. Your name or any identifier will not be used in any publication or reports from this study. Information that we collect about you and members of your household will only be shared with authorized study members such as authorized study staff and officials from ethics committees.

Site \_\_\_\_\_ Subarea \_\_\_\_\_ House number \_\_\_\_\_

Interviewer ID \_\_\_\_\_

**Contact point for questions**

If you or members of your household have any questions, please ask them now to the study team or at any time later by contacting [add name of local principal- and/or co-investigator, respective affiliations, and phone numbers]. If you have questions as a study participant about your/your household members' rights, you can contact the [add name and contact details of the local ethics committee].

**Statement of consent**

This consent form for participating in the assessment of health behaviour and other population-based factors in [add study site and -country] has been read by me/to me carefully. The purpose, procedures, risks & benefits have been explained to me in detail. I have been allowed to ask questions at any time, and my questions have been answered to my satisfaction by the study team. I have been told whom to contact if I have questions, want to discuss problems or concerns. I have been told that I will be given a signed and dated copy of this consent form. I have been reassured that all information obtained as result of this study will be kept confidential and used only for the purpose of this study and only by participating institutions.

I, the respondent, consent hereby voluntarily to participate in this study. I will follow the directions of the study team and give them my full cooperation. I understand that I have the right to withdraw from the study at any time.

**RESPONDENT**

Name: \_\_\_\_\_  
(given name + middle name (if available) + family name)

Signature: \_\_\_\_\_  
(handwritten depiction of person's name/mark that the person writes on a document as a proof of identity)

Date \_\_\_\_/\_\_\_\_/\_\_\_\_ (DD/MM/YYYY)

Thumbprint

If the respondent is unable to sign/illiterate but agrees to participate, record the respondent's thumb print in the above box, and have an adult study-independent literate witness (e.g. member of the same household or a neighbor) sign below:

**WITNESS**

Name: \_\_\_\_\_  
(given name + middle name (if available) + family name)

Signature: \_\_\_\_\_  
(handwritten depiction of person's name/mark that the person writes on a document as a proof of identity)

Date \_\_\_\_/\_\_\_\_/\_\_\_\_ (DD/MM/YYYY)

I, the interviewer, have read/explained the study to the above named respondent (witness if respondent is illiterate) in a language that the respondent understands well. I am certain that the respondent has understood the information and he/she agrees to be asked some questions.

**INTERVIEWER**

Name: \_\_\_\_\_  
(given name + middle name (if available) + family name)

Signature: \_\_\_\_\_  
(handwritten depiction of person's name/mark that the person writes on a document as a proof of identity)

Date \_\_\_\_/\_\_\_\_/\_\_\_\_ (DD/MM/YYYY)

Site \_\_\_\_\_ Subarea \_\_\_\_\_ House number \_\_\_\_\_

Interviewer ID \_\_\_\_\_

**FORM 3: GENERAL HOUSEHOLD INFORMATION****Instructions to the interviewer**

- Complete this form only if the respondent consented to participate (see “Form 2 – CONSENT FORM”); the respondent as defined for this investigation is an adult (at the country-specific legal age of majority) household member and decision-maker with respect to daily healthcare/healthcare utilization for the entire household and its members; it must not be e.g. a neighbour or a visitor.
- Collect data about all household members regardless of whether all household members are present at the time of the interview; collecting and recording data only about individuals present at the time of the interview will result in biased data.
- A household is/household members are defined as a person or a group of related or unrelated persons that live together in the same dwelling unit, that acknowledge one male or female adult as the head of the household, that share the same housekeeping arrangements, that are considered to constitute one unit, and that provide themselves with food or other essentials for living.
- “Site” and “Subarea” must be entered each as a 3-digit, “House number” as a 4-digit, and “Interviewer ID” as a 2-digit code (use lists individually prepared for each site to obtain codes). “Study label” must be a combination of a 3-digit “Site” code, a 3-digit “Subarea” code and a 4-digit “House number” code; the “Interviewer ID” must be entered as a 3-digit code.

**FORM 3: GENERAL HOUSEHOLD INFORMATION**  
**PART A – DEMOGRAPHIC DATA/GENERAL HOUSEHOLD INFORMATION**

**HOUSE LOCATION****1 Site, subarea and house number**

*Instructions:* Site (=study site) and subarea (=smallest unit of the study site) must be recorded each as a 3-digit, and house number as a 4-digit code; use individually prepared lists to obtain the respective codes.

Site: \_\_\_\_\_ Subarea: \_\_\_\_\_ House number: \_\_\_\_\_

**2 GPS coordinates**

*Instructions:* Take GPS coordinates at the approx. center of the house. Record altitude as a 4-digit number (unit: meter), and latitude/longitude as a 7-digit number (unit: degrees, decimal minutes).

1=Original household                       2=Replacement household (right/left side of original household)

Altitude: \_\_\_\_\_

Latitude: \_\_\_\_\_° \_\_\_\_\_'                      Longitude: \_\_\_\_\_° \_\_\_\_\_'

**RESPONDENT****3 Provide the full name of the respondent.**

*Instructions:* Record given name, middle name (if available) and family name of the respondent.

**4 Provide the age of the respondent.**

*Instruction:* Recorded as a 3-digit number (unit: year). \_\_\_\_\_

**5 Provide the sex of the respondent.**

1=Male                       2=Female

**6 What is the respondent's relationship to this household?**

- |                                                                  |                                                                    |
|------------------------------------------------------------------|--------------------------------------------------------------------|
| <input type="radio"/> 1=Household head                           | <input type="radio"/> 7=Spouse of household head                   |
| <input type="radio"/> 2=Son/daughter of household head           | <input type="radio"/> 8=Spouse of son/daughter of household head   |
| <input type="radio"/> 3=Brother/sister of household head         | <input type="radio"/> 9=Spouse of brother/sister of household head |
| <input type="radio"/> 4=Mother/father of household head          | <input type="radio"/> 10=Mother/father in law of household head    |
| <input type="radio"/> 5=Granddaughter/grandson of household head | <input type="radio"/> 11=Niece/nephew of household head            |
| <input type="radio"/> 6=Other, specify _____                     | <input type="radio"/> 98=No response                               |

Site \_\_\_\_\_ Subarea \_\_\_\_\_ House number \_\_\_\_\_

Interviewer ID \_\_\_\_\_

**HOUSEHOLD MEMBERS****7 How many household members are living in this house in total (at the day of visit)?***Instruction:* Recorded as a 2-digit number.

Total number of household members: \_\_\_\_\_

**8 Record age and sex of each household member.**

*Instructions:* Record the respondent's initials, age and sex at the first position/row of the table. Initials, age and sex of all other household members must be recorded subsequently. The initials of a household member consist of the first three letters of the given name and the first three letters of the family name (a potential middle name is not part of the initials). Record the age of each household member as a 3-digit number (unit: year); if a household member's age is ≤12 months, record the age as 1 year. Please complete an additional form if a household has >20 members.

| Household member identifier | Initials<br>[given name/family name] | Age<br>[year] | Sex               |
|-----------------------------|--------------------------------------|---------------|-------------------|
| 1/Respondent                | _____/____                           | ____          | O1=Male O2=Female |
| 2                           | _____/____                           | ____          | O1=Male O2=Female |
| 3                           | _____/____                           | ____          | O1=Male O2=Female |
| 4                           | _____/____                           | ____          | O1=Male O2=Female |
| 5                           | _____/____                           | ____          | O1=Male O2=Female |
| 6                           | _____/____                           | ____          | O1=Male O2=Female |
| 7                           | _____/____                           | ____          | O1=Male O2=Female |
| 8                           | _____/____                           | ____          | O1=Male O2=Female |
| 9                           | _____/____                           | ____          | O1=Male O2=Female |
| 10                          | _____/____                           | ____          | O1=Male O2=Female |
| 11                          | _____/____                           | ____          | O1=Male O2=Female |
| 12                          | _____/____                           | ____          | O1=Male O2=Female |
| 13                          | _____/____                           | ____          | O1=Male O2=Female |
| 14                          | _____/____                           | ____          | O1=Male O2=Female |
| 15                          | _____/____                           | ____          | O1=Male O2=Female |
| 16                          | _____/____                           | ____          | O1=Male O2=Female |
| 17                          | _____/____                           | ____          | O1=Male O2=Female |
| 18                          | _____/____                           | ____          | O1=Male O2=Female |
| 19                          | _____/____                           | ____          | O1=Male O2=Female |
| 20                          | _____/____                           | ____          | O1=Male O2=Female |

Site \_\_\_\_\_ Subarea \_\_\_\_\_ House number \_\_\_\_\_

Interviewer ID \_\_\_\_\_

**FORM 3: GENERAL HOUSEHOLD INFORMATION  
PART B – SOCIO-ECONOMIC DATA**

**EDUCATION**

- 1 Can the head of household read in [add the official language of the study site/country]?**  
 1=Yes       2=No       99=Don't know       98=No response
- 2 Can the head of household write in [add the official language of the study site/country]?**  
 1=Yes       2=No       99=Don't know       98=No response
- 3 What is the highest completed level of formal school education of the head of household?**  
 1=Primary school       4=Higher than secondary school       99=Don't know  
 2=Middle school       5=NO EDUCATION       98=No response  
 3=Secondary school       6=Other, specify \_\_\_\_\_

**OCCUPATION/INCOME**

**4 What is the main occupation of the household head?**

*Instructions:* Record the status of the day of visit only.

- 1=Group 1: Managers  
(chief executives, senior officials, legislators; administrative and commercial managers; production and specialized services managers; hospitality, retail and other services managers)
- 2=Group 2: Professional  
(science and engineering professionals; health professionals; teaching professionals; business and administration professionals; information and communications technology professionals; legal, social and cultural professionals)
- 3=Group 3: Technicians and Associate Professionals  
(science and engineering associate professionals; health associate professionals; business and administration associate professionals; legal, social, cultural and related associate professionals; information and communications technicians)
- 4=Group 4: Clerical Support Workers  
(general and keyboard clerks; customer services clerks; numerical and material recording clerks; other clerical support workers)
- 5=Group 5: Services and Sales Workers  
(personal services workers; sales workers; personal care workers; protective services workers)
- 6=Group 6: Skilled Agricultural, Forestry, and Fishery Workers  
(market-oriented skilled agricultural workers; animal producers; market-oriented skilled forestry, fishery and hunting workers; subsistence farmers, fishers, hunters and gatherers)
- 7=Group 7: Craft and Related Trades Workers  
(building and related trades workers (excluding electricians); metal, machinery and related trades workers; handicraft and printing workers; electrical and electronics trades workers; food processing, woodworking, garment and other craft and related trades workers)
- 8=Group 8: Plant and Machine Operators, and Assemblers  
(stationary plant and machine operators; assemblers; drivers and mobile plant operators)
- 9=Group 9: Elementary Occupations  
(cleaners and helpers; agricultural, forestry and fishery labourers; labourers in mining, construction, manufacturing and transport; food preparation assistants; street and related sales and services workers; refuse workers and other elementary workers)
- 10=Group 0: Armed Forces Occupations  
(commissioned armed forces officers; non-commissioned armed forces officers; armed forces occupations, other ranks)
- 11=Other, specify \_\_\_\_\_
- 12=NO OCCUPATION       99=Don't know       98=No response

Site \_\_\_\_\_ Subarea \_\_\_\_\_ House number \_\_\_\_\_

Interviewer ID \_\_\_\_\_

**5 What is the average monthly income of the household head based on the occupation stated in question 4 and of other household members?**

*Instruction:* Tick one answer per household head/enter one code per household member if applicable/if income available.

| Head of household   | Member 1            | Member 2                                 | Member 3         |
|---------------------|---------------------|------------------------------------------|------------------|
| Code _____          | Code _____          | Code _____                               | Code _____       |
| [1] <100USD         | [3] ≥150 to <200USD | [5] ≥250USD                              | [99] Don't know  |
| [2] ≥100 to <150USD | [4] ≥200 to <250USD | [6] Head of household NO INCOME (see Q4) | [98] No response |

**6 Which and how much other/additional source(s) of monthly monetary earnings has this household?**

*Instruction:* Tick all that applies; more than one answer is possible.

| Other/additional sources                                                                                                                                                                                                                                                                                                                           | Overall monthly monetary earnings                                                                                                                                                                        |
|----------------------------------------------------------------------------------------------------------------------------------------------------------------------------------------------------------------------------------------------------------------------------------------------------------------------------------------------------|----------------------------------------------------------------------------------------------------------------------------------------------------------------------------------------------------------|
| <input type="radio"/> 1=Social grants<br><input type="radio"/> 2=Insurance (i.e. private, public)<br><input type="radio"/> 3=Loan (i.e. from friends, family, bank)<br><input type="radio"/> 4=Selling (i.e. livestock, crops, furniture, other goods)<br><input type="radio"/> 5=Personal savings<br><input type="radio"/> 6=Other, specify _____ | <input type="radio"/> 1=<100 USD<br><input type="radio"/> 2=≥100 to <150 USD<br><input type="radio"/> 3=≥150 to <200 USD<br><input type="radio"/> 4=≥200 to <250 USD<br><input type="radio"/> 5=≥250 USD |
| <input type="radio"/> 7=NO OTHER/ADDITIONAL SOURCES<br><input type="radio"/> 99=Don't know<br><input type="radio"/> 98=No response                                                                                                                                                                                                                 |                                                                                                                                                                                                          |

**HOUSING/DWELLING**

**7 Is the house owned by the members of this household?**

- 1=Yes       3=No, supplied (i.e. government, employer)       99=Don't know  
 2=No, rented       4=No, other, specify \_\_\_\_\_       98=No response

**8 How many room(s)/individual house structure(s) of this household are used for sleeping, living, cooking and bathing?**

*Instruction:* Enter one code per category only.

| Bedroom    | Living room | Kitchen          | Bathroom   |
|------------|-------------|------------------|------------|
| Code _____ | Code _____  | Code _____       | Code _____ |
| [1] 1-2    | [3] >4      | [99] Don't know  |            |
| [2] 3-4    | [4] None    | [98] No response |            |

**9 What is the construction material of the floor, the walls and the roof of room(s)/individual house structure(s) of this house?**

*Instruction:* Enter all codes that applies per category; more than one answer per category is possible.

| Floor               | Walls      | Roof                     |
|---------------------|------------|--------------------------|
| Code _____          | Code _____ | Code _____               |
| [1] Brick           | [3] Tiles  | [5] Wood                 |
| [2] Cement/Concrete | [4] Mud    | [6] Straw/Leaves         |
|                     |            | [7] Metal/Tin            |
|                     |            | [8] Other, specify _____ |
|                     |            | [99] Don't know          |
|                     |            | [98] No response         |

**10 Do members of this household have access to/utilize electricity in this household?**

- 1=Yes       2=No       99=Don't know       98=No response

**11 Which main source of light have members of this household access to/are utilizing?**

- 1=Electric light/Light bulb(s)       4=Battery-powered lamp(s)       7=Other, specify \_\_\_\_\_  
 2=Solar light/Solar lamp(s)       5=Candle(s)       99=Don't know  
 3=Paraffin lamp(s)/Oil lamp(s)       6=NO SOURCE OF LIGHT       98=No response

Site \_\_\_\_\_ Subarea \_\_\_\_\_ House number \_\_\_\_\_

Interviewer ID \_\_\_\_\_

**HOUSEHOLD ASSETS****12 Which of the following items do members of this household own?***Instructions:* Tick all that applies; more than one answer is possible; record the quantity of functional items where applicable.

|                                             |                |                            |                                            |                |                            |
|---------------------------------------------|----------------|----------------------------|--------------------------------------------|----------------|----------------------------|
| <input type="radio"/> 1=Radio               | Quantity _____ | <input type="radio"/> None | <input type="radio"/> 11=Tape/CD player    | Quantity _____ | <input type="radio"/> None |
| <input type="radio"/> 2=Television          | Quantity _____ | <input type="radio"/> None | <input type="radio"/> 12=Computer/Laptop   | Quantity _____ | <input type="radio"/> None |
| <input type="radio"/> 3=Internet connection | Quantity _____ | <input type="radio"/> None | <input type="radio"/> 13=Mobile/Cell phone | Quantity _____ | <input type="radio"/> None |
| <input type="radio"/> 4=Car                 | Quantity _____ | <input type="radio"/> None | <input type="radio"/> 14=Truck/Bus         | Quantity _____ | <input type="radio"/> None |
| <input type="radio"/> 5=Motorbike           | Quantity _____ | <input type="radio"/> None | <input type="radio"/> 15=Bicycle           | Quantity _____ | <input type="radio"/> None |
| <input type="radio"/> 6=Oxcart/Donkey       | Quantity _____ | <input type="radio"/> None | <input type="radio"/> 16=Bed               | Quantity _____ | <input type="radio"/> None |
| <input type="radio"/> 7=Mattress            | Quantity _____ | <input type="radio"/> None | <input type="radio"/> 17=Bed net           | Quantity _____ | <input type="radio"/> None |
| <input type="radio"/> 8=Table               | Quantity _____ | <input type="radio"/> None | <input type="radio"/> 18=Chair             | Quantity _____ | <input type="radio"/> None |
| <input type="radio"/> 9=Refrigerator (4°C)  | Quantity _____ | <input type="radio"/> None | <input type="radio"/> 19=Freezer (-20°C)   | Quantity _____ | <input type="radio"/> None |
| <input type="radio"/> 10=Fan                | Quantity _____ | <input type="radio"/> None | <input type="radio"/> 20=Sewing machine    | Quantity _____ | <input type="radio"/> None |



Site \_\_\_\_\_ Subarea \_\_\_\_\_ House number \_\_\_\_\_

Interviewer ID \_\_\_\_\_

**FORM 3: GENERAL HOUSEHOLD INFORMATION**  
**Part C – Hygiene and sanitation**

**TOILET FACILITY**

**1 To what type of toilet facility have members of this household usually access?**

*Instruction: Inside means inside a room/individual house structure/building; outside means outside a room/individual house structure/building.*

- 1=Flush toilet/Water closet (inside)                       8=Composting toilet (outside)  
 2=Flush toilet/Water closet (outside)                       9=NO toilet facility, use a bucket  
 3=Non-flush latrine/pit latrine (inside)                       10=NO toilet facility, dig a hole  
 4=Non-flush latrine/pit latrine (outside)                       11=NO toilet facility, free range/open defecation  
 5=Ventilated Improved Pit Latrine (KVIP, inside)                       12=Other, specify \_\_\_\_\_  
 6=Ventilated Improved Pit Latrine (KVIP, outside)                       99=Don't know  
 7=Composting toilet (inside)                       98=No response

**2 Do members of this household usually utilize the toilet facility stated in question 1?**

- 1=No, members cannot utilize the facility independently (i.e. infants, toddlers)                       6=No, bad condition (i.e. broken, not clean)  
 2=No, members cannot utilize the facility independently (i.e. disabled, long-term/chronically diseased)                       7=YES  
 3=No, members cannot utilize the facility independently (i.e. seniors)                       8=Other, specify \_\_\_\_\_  
 4=No, limited access (i.e. public, shared with other households/community)                       99=Don't know  
 5=No, too far away (i.e. public, shared with other households/community)                       98=No response

**3 Where is the toilet facility stated in question 1 located? With how many other people is it usually shared?**

- 1=On the property of this household (private, not shared)  
 2=On the property of a neighbouring household (private, shared)  
     *Shared*     1=<10 people                       3=25-49 people                       99=Don't know  
                      2=11-24 people                       4=>50 people                       98=No response  
 3=In the community (public, shared)  
     *Shared*     1=<10 people                       3=25-49 people                       99=Don't know  
                      2=11-24 people                       4=>50 people                       98=No response  
 4=Other, specify \_\_\_\_\_                       99=Don't know                       98=No response

**4 How do members of this household that have/don't have access to a toilet facility usually clean their hands directly before and after urination/defection?**

*Instruction: Enter one code per category only.*

| Clean hands before urination/defection            | Clean hands after urination/defection                   |
|---------------------------------------------------|---------------------------------------------------------|
| Code _____                                        | Code _____                                              |
| [1] Wash hands with soap and water                | [6] Don't clean, not needed/not dirty                   |
| [2] Wash hands with water only                    | [7] Don't clean, nothing to clean hands nearby/on hands |
| [3] Rub hands clean with some leaves/straw/ grass | [8] Other, specify _____                                |
| [4] Rub hands clean with some sand                | [99] Don't know                                         |
| [5] Rub hands clean with some cloth/fabric        | [98] No response                                        |

**KITCHEN/FOOD HANDLING**

**5 Do members of this household have a kitchen for cooking/preparing food/meals? Where is it located?**

- 1=Yes, inside kitchen/in a room/individual house structure; on the property of this household (private, not shared)  
 2=Yes, outside kitchen/outside a room/individual house structure/ open air; on the property of this

Site \_\_\_\_\_ Subarea \_\_\_\_\_ House number \_\_\_\_\_

Interviewer ID \_\_\_\_\_

household (private, not shared)

3=Yes, inside kitchen/in a room/individual house structure; on the property of a neighbouring household (private, shared)

4=Yes, outside kitchen/outside a room/individual house structure/ open air; on the property of a neighbouring household (private, shared)

5=NO KITCHEN

6=Other, specify \_\_\_\_\_  99=Don't know  98=No response

**6 What energy source do members of this household usually use for cooking/preparing food/meals?**

1=Electricity  3=Charcoal  5=Animal dung  99=Don't know  
 2=Gas/Kerosene  4=Wood/straw/leaves  6=Other, specify \_\_\_\_\_  98=No response

**7 What cooking spot do members of this household usually use for cooking/preparing food/meals?**

1=Open fire  3=Closed stove with chimney  99=Don't know  
 2=Open stove  4=Other, specify \_\_\_\_\_  98=No response

**8 Where do members of this household usually store fresh/raw food items (e.g. vegetables, lettuce, fruits, dairy products, eggs, meat and fish) and left-over/prepared food/meals?**

*Instruction:* Enter one code per category only. Inside means inside a room/individual house structure/building; outside means outside a room/individual house structure/building.

| Fresh/raw food items (i.e. vegetables, lettuce, fruits, dairy products, eggs, meat and fish)                                                                                                                                                                                                                                                                                                                                                                                                                                                                                                                                                                                                                                                                                             | Left-over/prepared food/meals |
|------------------------------------------------------------------------------------------------------------------------------------------------------------------------------------------------------------------------------------------------------------------------------------------------------------------------------------------------------------------------------------------------------------------------------------------------------------------------------------------------------------------------------------------------------------------------------------------------------------------------------------------------------------------------------------------------------------------------------------------------------------------------------------------|-------------------------------|
| Code _____                                                                                                                                                                                                                                                                                                                                                                                                                                                                                                                                                                                                                                                                                                                                                                               | Code _____                    |
| [1] At room temperature (inside, on the property of this household, private)<br>[2] At room temperature (outside, on the property of this household, private)<br>[3] At room temperature (inside, on the property of a neighboring household, private, shared)<br>[4] At room temperature (outside, on the property of a neighboring household, private, shared)<br>[5] Refrigerator (on the property of this household, private)<br>[6] Refrigerator (on the property of a neighboring household, private, shared)<br>[7] Freezer (on the property of this household, private)<br>[8] Freezer (on the property of a neighboring household, private, shared)<br>[9] Other, specify _____<br>[10] NO STORAGE <input type="radio"/> [99] Don't know <input type="radio"/> [98] No response |                               |

**9 If the answer is "Room temperature" for fresh/raw food items and/or left-over/prepared food/meals in question 8, how long do members of this household usually store them?**

*Instruction:* Enter one code per category only.

| Fresh/raw food items (i.e. vegetables, lettuce, fruits, dairy products, eggs, meat and fish)                                                                                                                                                                      | Left-over/prepared food/meals |
|-------------------------------------------------------------------------------------------------------------------------------------------------------------------------------------------------------------------------------------------------------------------|-------------------------------|
| Code _____                                                                                                                                                                                                                                                        | Code _____                    |
| [1] <1 day <input type="radio"/> [3] 3-4 days <input type="radio"/> [5] Not applicable <input type="radio"/> [99] Don't know <input type="radio"/><br>[2] 1-2 days <input type="radio"/> [4] >4 days <input type="radio"/> [98] No response <input type="radio"/> |                               |

**10 Do members of this household usually cover left-over/prepared food/meals? Do they re-heat/re-cook left-over/prepared food/meals prior to consumption?**

*Instruction:* Enter one code per category only.

| Cover left-over/prepared food/meals                                                                                                     | Re-heat/Re-cook left-over/prepared food/meals |
|-----------------------------------------------------------------------------------------------------------------------------------------|-----------------------------------------------|
| Code _____                                                                                                                              | Code _____                                    |
| [1] Yes <input type="radio"/> [2] No <input type="radio"/> [99] Don't know <input type="radio"/> [98] No response <input type="radio"/> |                                               |

Site \_\_\_\_\_ Subarea \_\_\_\_\_ House number \_\_\_\_\_

Interviewer ID \_\_\_\_\_

**11 Which member(s) of this household usually cook(s)/prepare(s) food/meals for other members of this household?**

*Instructions:* Refer to question 9 of "Form 3 Part A – Demographic data/General household information" and record the initials/identifier(s) of the member.

Household member, record initials/identifier(s) \_\_\_\_\_  99=Don't know  98=No response

**12 How does/do the household member(s) that usually cook(s)/prepare(s) food/meals for other members of this household as stated in question 11 usually prepare(s) herself/himself/themselves before and after the preparation of meals?**

*Instruction:* Enter one code per category only.

| Before the preparation of meals                   | After the preparation of meals                          |
|---------------------------------------------------|---------------------------------------------------------|
| Code _____                                        | Code _____                                              |
| [1] Wash hands with soap and water                | [6] Don't clean, not needed/not dirty                   |
| [2] Wash hands with water only                    | [7] Don't clean, nothing to clean hands nearby/on hands |
| [3] Rub hands clean with some leaves/straw/ grass | [8] Other, specify _____                                |
| [4] Rub hands clean with some sand                | [99] Don't know                                         |
| [5] Rub hands clean with some cloth/fabric        | [98] No response                                        |

**13 How do members of this household usually prepare themselves before and after eating food/meals, including the household member that usually cooks/prepares food/meals as stated in question 11?**

*Instruction:* Enter one code per category only.

| Before the eating of food/meals                   | After the eating of food/meals                          |
|---------------------------------------------------|---------------------------------------------------------|
| Code _____                                        | Code _____                                              |
| [1] Wash hands with soap and water                | [6] Don't clean, not needed/not dirty                   |
| [2] Wash hands with water only                    | [7] Don't clean, nothing to clean hands nearby/on hands |
| [3] Rub hands clean with some leaves/straw/ grass | [8] Other, specify _____                                |
| [4] Rub hands clean with some sand                | [99] Don't know                                         |
| [5] Rub hands clean with some cloth/fabric        | [98] No response                                        |

**14 How do members of this household usually eat their food/meals, including the household member that usually cooks/prepares food/meals as stated in question 11?**

1=With cutlery  3=Other, specify \_\_\_\_\_  99=Don't know

2=With fingers  98=No response

**15 Do members of this household usually eat their food/meals from the same pot, including the household member that usually cooks/prepares food/meals as stated in question 11?**

1=Yes  2=No  99=Don't know  98=No response

**16 Where do members of this household usually get their main fresh/raw food items such as vegetables, fruits and grains/cereals, dairy products, eggs, meat and fish?**

*Instruction:* Enter one code per category only.

| Vegetables, fruits, grains/ cereals     | Dairy products                            | Eggs, meat, fish |
|-----------------------------------------|-------------------------------------------|------------------|
| Code _____                              | Code _____                                | Code _____       |
| [1] Self-farming (i.e. back-/courtyard) | [6] Self-farming (i.e. agricultural land) |                  |
| [2] Supermarket/Grocery store           | [7] Butcher                               |                  |
| [3] Friend/Family                       | [8] Other, specify _____                  |                  |
| [4] Open market                         | [99] Don't know                           |                  |
| [5] Street vendor                       | [98] No response                          |                  |

**17 Do members of this household usually consume/eat fresh/raw food items (e.g. vegetables, lettuce, fruits, dairy products, ice cream, eggs, meat and fish)? If so, which ones?**

Site \_\_\_\_\_ Subarea \_\_\_\_\_ House number \_\_\_\_\_ Interviewer ID \_\_\_\_\_

*Instruction:* Tick all that applies; more than one answer is possible.

- 1=Vegetables/Lettuce (cultivated on bush)
- 2=Vegetables/Lettuce (wild harvesting from bush)
- 3=Fruits (cultivated on bush/tree)
- 4=Fruits (wild harvesting from bush/tree)
- 5=Dairy products (i.e. milk, cheese, yoghurt from domesticated milk producing animals), specify \_\_\_\_\_
- 6=Eggs (from domesticated poultry), specify \_\_\_\_\_
- 7=Animal blood (from domesticated animals), specify \_\_\_\_\_
- 8=Beef/Zebu/Buffalo (domesticated), specify \_\_\_\_\_
- 9=Pork (domesticated)
- 10=Sheep (domesticated)
- 11=Meat from non-domesticated animals (i.e. antelope, boar, poultry, rodents, fish), specify \_\_\_\_\_
- 12=NO CONSUMPTION of fresh/raw food items
- 13=Vegetables/Lettuce (cultivated on ground)
- 14=Vegetables/Lettuce (wild harvesting from ground)
- 15=Fruits (cultivated on ground)
- 16=Fruits (wild harvesting from ground)
- 17=Dairy products (i.e. milk, cheese, yoghurt from non-domesticated milk producing animals), specify \_\_\_\_\_
- 18=Eggs (from non-domesticated poultry), specify \_\_\_\_\_
- 19=Animal blood (from non-domesticated animals), specify \_\_\_\_\_
- 20=Poultry (domesticated; i.e. chicken, duck, pigeon, goose, turkey), specify \_\_\_\_\_
- 21=Goat (domesticated)
- 22=Rodents (domesticated), specify \_\_\_\_\_
- 23=Fish/Seafood, specify \_\_\_\_\_
- 24=Ice cream
- 25=Other, specify \_\_\_\_\_
- 99=Don't know     98=No response

**18 Do members of this household consume meals/food items/beverages usually also outside the house? If so, which member(s) of this household and where?**

*Instructions:* Refer to question 9 of "Form 3 Part A – Demographic data/General household information" and record the initials/identifier of the member(s). Enter all codes that apply for the respective household member.

| Member 1<br>Initials/Identifier: _____ | Member 2<br>Initials/Identifier: _____ | Member 3<br>Initials/Identifier: _____         | Member 4<br>Initials/Identifier: _____ |
|----------------------------------------|----------------------------------------|------------------------------------------------|----------------------------------------|
| Code _____                             | Code _____                             | Code _____                                     | Code _____                             |
| [1] Restaurant<br>[2] Fast food chain  | [3] Cafeteria<br>[4] Street vendor     | [5] Other, specify _____<br>[6] Not applicable | [99] Don't know<br>[98] No response    |

**19 Which meals/food items/beverages do the member(s) of this household listed in question 18 usually consume outside the house?**

*Instructions:* Refer to question 9 of "Form 3 Part A – Demographic data/General household information" and record the initials/identifier of the member(s). List up to 5 meals/food items/beverages per household member. You can refer to food items listed in question 17. Skip this question if no household member consumes meals/food items/beverages outside the house as stated in Q18.

| Member 1<br>Initials/Identifier: _____ | Member 2<br>Initials/Identifier: _____ | Member 3<br>Initials/Identifier: _____ | Member 4<br>Initials/Identifier: _____ |
|----------------------------------------|----------------------------------------|----------------------------------------|----------------------------------------|
| 1: _____                               | 1: _____                               | 1: _____                               | 1: _____                               |
| 2: _____                               | 2: _____                               | 2: _____                               | 2: _____                               |
| 3: _____                               | 3: _____                               | 3: _____                               | 3: _____                               |
| 4: _____                               | 4: _____                               | 4: _____                               | 4: _____                               |
| 5: _____                               | 5: _____                               | 5: _____                               | 5: _____                               |

**WATER**

**20 What is the main water supply for members of this household for drinking, cooking/preparing food/meals, bathing, and cleaning (of house/individual house structure(s), clothing/kitchen tools)?**

*Instruction:* Enter one code per category only.

| Drinking                                                        | Cooking    | Bathing    | Cleaning   |
|-----------------------------------------------------------------|------------|------------|------------|
| Code _____                                                      | Code _____ | Code _____ | Code _____ |
| [1] Tap water (inside the house; private)                       |            |            |            |
| [2] Tap water (outside the house i.e. back-/courtyard; private) |            |            |            |

Site \_\_\_\_\_ Subarea \_\_\_\_\_ House number \_\_\_\_\_

Interviewer ID \_\_\_\_\_

- [3] Tap water (outside the house; public/shared)  
 [4] Standpipe/Piped water (inside the house; private)  
 [5] Standpipe/Piped water (outside the house i.e. back-/ courtyard; private)  
 [6] Standpipe/Piped water (outside the house; public/shared)  
 [7] Water truck (public; shared)  
 [8] Surface water (i.e. canal, irrigation canal)  
 [9] Surface water (i.e. lake, pond, river, stream)  
 [10] Spring water  
 [11] Rain water  
 [12] Well/Borehole (open/uncovered/unprotected)  
 [13] Well/Borehole (covered/protected)  
 [14] Bottled water  
 [15] Other, specify \_\_\_\_\_ [99] Don't know [98] No response

**21 Do members of this household usually treat water for drinking, cooking/ preparing food/meals, bathing, and cleaning (of house/individual house structure(s), clothing/ kitchen tools) prior to consumption? How is water usually treated?**

*Instruction:* Enter all codes that applies per category; more than one answer per category is possible.

| Drinking                                          | Cooking                                         | Bathing                                             | Cleaning                         |
|---------------------------------------------------|-------------------------------------------------|-----------------------------------------------------|----------------------------------|
| Code _____                                        | Code _____                                      | Code _____                                          | Code _____                       |
| [1] No, not at all                                | [7] No, only for children of this household     | [8] No, only depending on the season (rainy season) | [9] Yes, boiling                 |
| [2] No, only for sick members of this household   | [10] Yes, solar disinfection                    | [11] Yes, chlorination                              | [99] Don't know [98] No response |
| [3] No, only depending on the season (dry season) | [4] Yes, filtration (i.e. cloth, ceramic, sand) | [5] Yes, sedimentation                              |                                  |
| [6] Other, specify _____                          |                                                 |                                                     |                                  |

**22 Which member(s) of this household usually collect(s) the drinking water as stated in question 20 for other members of this household?**

*Instructions:* Refer to question 9 of "Form 3 Part A – Demographic data/General household information" and record the initials/identifier of the member.

Household member, record initials/identifier(s) \_\_\_\_\_  99=Don't know  98=No response

**23 How do members of this household usually store the drinking water stated in question 20?**

- 1=Water tank (uncovered)  10=Bowl (covered with i.e. cloth/fabric, lid, leaves)  
 2=Water tank (covered with i.e. cloth/fabric, lid, leaves)  11=Wooden pot (uncovered)  
 3=Container (uncovered)  12=Wooden pot (covered with i.e. cloth/fabric, lid, leaves)  
 4=Container (covered with i.e. cloth/fabric, lid, leaves)  13=Skin vessel (i.e. goat, sheep, cattle; uncovered)  
 5=Clay pot (uncovered)  14=Skin vessel (i.e. goat, sheep, cattle; covered with i.e. cloth/fabric, lid, leaves)  
 6=Clay pot (covered with i.e. cloth/fabric, lid, leaves)  15=NOT STORED  
 7=Bucket (uncovered)  16=Other, specify \_\_\_\_\_  
 8=Bucket (covered with i.e. cloth/fabric, lid, leaves)  99=Don't know  
 9=Bowl (uncovered)  98=No response

**24 If members of this household use a shared drinking water supply as stated in question 20, with how many other people is this drinking water supply usually shared?**

- 1=<10 people  3=25-49 people  5=NOT SHARED  99=Don't know  
 2=11-24 people  4=>50 people  98=No response



Site \_\_\_\_\_ Subarea \_\_\_\_\_ House number \_\_\_\_\_

Interviewer ID \_\_\_\_\_

| Farm animals/livestock                                                                     |                                                                | Domestic animals/pets                                        |
|--------------------------------------------------------------------------------------------|----------------------------------------------------------------|--------------------------------------------------------------|
| <input type="radio"/> 1=Cattle                                                             | <input type="radio"/> 9=Camel                                  | <input type="radio"/> 1=Dog                                  |
| <input type="radio"/> 2=Sheep                                                              | <input type="radio"/> 10= Rodents (i.e. rabbit), specify _____ | <input type="radio"/> 2=Rodents (i.e. rabbit), specify _____ |
| <input type="radio"/> 3=Donkey                                                             | <input type="radio"/> 11=Goat                                  | <input type="radio"/> 3=Cat                                  |
| <input type="radio"/> 4=Poultry (i.e. chicken, duck, pigeon, goose, turkey), specify _____ | <input type="radio"/> 12=Horse                                 | <input type="radio"/> 4=NO DOMESTIC ANIMALS/PETS             |
| <input type="radio"/> 5=Zebu                                                               | <input type="radio"/> 13=NO FARM ANIMALS/LIVESTOCK             | <input type="radio"/> 5=Other, specify _____                 |
| <input type="radio"/> 6=Pig                                                                | <input type="radio"/> 14=Other, specify _____                  | <input type="radio"/> 99=Don't know                          |
| <input type="radio"/> 7=Fish                                                               | <input type="radio"/> 99=Don't know                            | <input type="radio"/> 98=No response                         |
| <input type="radio"/> 8=Buffalo                                                            | <input type="radio"/> 98=No response                           |                                                              |

**30 Where do members of this household usually keep farm animals/livestock and domestic animals/pets of this household as stated in question 29?**

*Instruction: Tick one answer per category only.*

| Farm animals/livestock                                                                                                   | Domestic animals/pets                                                                  |
|--------------------------------------------------------------------------------------------------------------------------|----------------------------------------------------------------------------------------|
| <input type="radio"/> 1=Stable/Cage/Water basin on the property of the house (i.e. back-/courtyard)                      | <input type="radio"/> 1=Cage/Chain near the house (i.e. back-/courtyard)               |
| <input type="radio"/> 2=Stable/Cage/Water basin outside the house in the community                                       | <input type="radio"/> 2=Cage/Chain outside the house in the community                  |
| <input type="radio"/> 3=Stable/Cage/Water basin outside the community                                                    | <input type="radio"/> 3=Cage/Chain outside the community (public)                      |
| <input type="radio"/> 4=Free range/Surface water/Spring water on the property of the house (i.e. house, back-/courtyard) | <input type="radio"/> 4=Free range near the house (i.e. in the house, back-/courtyard) |
| <input type="radio"/> 5=Free range/Surface water/Spring water outside the house in the community                         | <input type="radio"/> 5=Free range outside the house in the community                  |
| <input type="radio"/> 6=Free range/Surface water/Spring water outside the community                                      | <input type="radio"/> 6=Free range outside the community                               |
| <input type="radio"/> 7=Not applicable (nowhere/no farm animals/livestock)                                               | <input type="radio"/> 7=Not applicable (nowhere/no domestic animals/pets)              |
| <input type="radio"/> 8=Other, specify _____                                                                             | <input type="radio"/> 8=Other, specify _____                                           |
| <input type="radio"/> 99=Don't know                                                                                      | <input type="radio"/> 99=Don't know                                                    |
| <input type="radio"/> 98=No response                                                                                     | <input type="radio"/> 98=No response                                                   |

**31 What is the extent of the livestock farming that members of this household practice?**

- |                                                                        |                                              |
|------------------------------------------------------------------------|----------------------------------------------|
| <input type="radio"/> 1=Own demand ("backyard farming")                | <input type="radio"/> 4=Other, specify _____ |
| <input type="radio"/> 2=Not applicable (no livestock farming)          | <input type="radio"/> 99=Don't know          |
| <input type="radio"/> 3=Mass/Industrial demand ("mass animal farming") | <input type="radio"/> 98=No response         |

**32 Which water supply do members of this household usually use to water farm animals/livestock and domestic animals/pets of this household as stated in question 29?**

*Instruction: Enter one code per category only.*

| Farm animals/livestock                                                       | Domestic animals/pets |
|------------------------------------------------------------------------------|-----------------------|
| Code _____                                                                   | Code _____            |
| [1] Tap water (inside the house; private)                                    |                       |
| [2] Tap water (outside the house i.e. back-/courtyard; private)              |                       |
| [3] Tap water (outside the house; public/shared)                             |                       |
| [4] Standpipe/Piped water (inside the house; private)                        |                       |
| [5] Standpipe/Piped water (outside the house i.e. back-/ courtyard; private) |                       |
| [6] Standpipe/Piped water (outside the house; public/shared)                 |                       |

Site \_\_\_\_\_ Subarea \_\_\_\_\_ House number \_\_\_\_\_

Interviewer ID \_\_\_\_\_

- [7] Water truck (public; shared)
- [8] Surface water (i.e. canal, irrigation canal)
- [9] Surface water (i.e. lake, pond, river, stream)
- [10] Spring water
- [11] Rain water
- [12] Well/Borehole (open/uncovered/unprotected)
- [13] Well/Borehole (covered/protected)
- [14] Not applicable (no farm animals/livestock; no domestic animals/pets)
- [15] Other, specify \_\_\_\_\_ [99] Don't know [98] No response

**33 Do members of this household usually wash their hands after they fed & watered and cleaned the stable/cage/water basin of the farm animals/livestock and domestic animals/pets of this household as stated in question 29?**

*Instruction:* Enter one code per category only.

| Farm animals/livestock                            | Domestic animals/pets                                                    |
|---------------------------------------------------|--------------------------------------------------------------------------|
| Code _____                                        | Code _____                                                               |
| [1] Wash hands with soap and water                | [7] Don't clean, nothing to clean hands nearby/on hands                  |
| [2] Wash hands with water only                    | [8] Other, specify _____                                                 |
| [3] Rub hands clean with some leaves/straw/ grass | [9] Not applicable (no farm animals/livestock; no domestic animals/pets) |
| [4] Rub hands clean with some sand                | [99] Don't know                                                          |
| [5] Rub hands clean with some cloth/fabric        | [98] No response                                                         |
| [6] Don't clean, not needed/not dirty             |                                                                          |

**CROP FARMING**

**34 What kind of crops do members of this household grow/cultivate?**

*Instruction:* Tick all that applies; more than one answer is possible.

- 1=Coffee
- 2=Rice
- 3=Fruits (cultivated on bush/tree)
- 4=Fruits (cultivated on the ground)
- 5=Vegetables/Lettuce (cultivated on bush/tree)
- 6=Vegetables/Lettuce (cultivated on the ground)
- 7=Grains (i.e. wheat, barley, oat, corn)
- 8=Tea
- 9=Cashew
- 10=Tobacco
- 11=Sugar cane
- 12=Chad/Chat
- 13=Bees/Honey
- 14=Cotton
- 15=NO CROPS
- 16=Other, specify \_\_\_\_\_
- 99=Don't know
- 98=No response

**35 Where do members of this household have the farmland/agricultural land for crop farming?**

- 1=On the property of the house (i.e. back-/courtyard)
- 2=Outside the community
- 3=Other, specify \_\_\_\_\_
- 4=Outside the house in the community
- 5=Not applicable (no crop farming)
- 99=Don't know
- 98=No response

**36 What is the extent of the crop farming that members of this household practice?**

- 1=Own demand ("backyard farming")
- 2=Not applicable (no crop farming)
- 3=Mass/Industrial demand ("mass crop farming")
- 4=Other, specify \_\_\_\_\_
- 99=Don't know
- 98=No response

**37 Do members of this household usually use herbicides, pesticides and fertilizers for the crop farming as stated in question 34?**

*Instruction:* Tick one answer per category only.

| Herbicides                                     | Pesticides                                     | Fertilizers                                     |
|------------------------------------------------|------------------------------------------------|-------------------------------------------------|
| <input type="radio"/> 1=Yes, specify herbicide | <input type="radio"/> 1=Yes, specify pesticide | <input type="radio"/> 1=Yes, specify fertilizer |



Site \_\_\_\_ Subarea \_\_\_\_ House number \_\_\_\_

Interviewer ID \_\_\_\_

- 2=Not applicable (no crop farming)
- 3=No use of herbicides
- 99=Don't know
- 98=No response

- 2=Not applicable (no crop farming)
- 3=No use of pesticides
- 99=Don't know
- 98=No response

- 2=Not applicable (no crop farming)
- 3=No use of fertilizers
- 99=Don't know
- 98=No response

**38 Do members of this household usually wash their hands after the fieldwork for the crop farming as stated in question 34?**

- 1=Yes, wash hands with soap and water
- 2=Yes, rub hands clean with some leaves/straw/grass
- 3=Yes, rub hands clean with some cloth/fabric
- 4=Not applicable (no crop farming)
- 5=Yes, wash hands with water only
- 6=Yes, rub hands clean with some sand
- 7=No, don't clean my hands
- 8=Other, specify \_\_\_\_\_
- 99=Don't know
- 98=No response

Site \_\_\_\_\_ Subarea \_\_\_\_\_ House number \_\_\_\_\_

Interviewer ID \_\_\_\_\_

## FORM 4: ASSESSMENT OF OVERALL, AGE- AND SEX-STRATIFIED GENERIC HEALTHCARE UTILIZATION

### Part A – Assessment of *generic* healthcare utilization

#### Instructions to the interviewer

- Complete this form only if the respondent consented to participate (see “Form 2 - CONSENT FORM”); the respondent as defined for this investigation is an adult (at the country-specific legal age of majority) household member and decision-maker with respect to daily healthcare/healthcare utilization for the entire household and its members; it must not be e.g. a neighbour or a visitor.
- Refer to “Form 3 – Part A - GENERAL HOUSEHOLD INFORMATION” as a reference to obtain the total number of household members as well as age and sex of each household member.
- Collect data about all household members regardless of whether all household members are present at the time of the interview; collecting and recording data only about individuals present at the time of the interview will result in biased data.
- A household is/household members are defined as a person or a group of related or unrelated persons that live together in the same dwelling unit, that acknowledge one male or female adult as the head of the household, that share the same housekeeping arrangements, that are considered to constitute one unit, and that provide themselves with food or other essentials for living.
- “Site” and “Subarea” must be entered each as a 3-digit, “House number” as a 4-digit, and “Interviewer ID” as a 2-digit code (use lists individually prepared for each site to obtain codes). “Study label” must be a combination of a 3-digit “Site” code, a 3-digit “Subarea” code and a 4-digit “House number” code; the “Interviewer ID” must be entered as a 3-digit code.
- Abbreviation: HCF=private/public primary/secondary/tertiary healthcare facility.

#### HOUSEHOLD MEMBERS

##### 1 Record the total number of household members of this house (at the day of visit).

*Instructions:* The total number of household members must be recorded as a 2-digit number; see also “Form 3 – Part A - GENERAL HOUSEHOLD INFORMATION”.

Total number of household members: \_\_\_\_\_

##### 2 Record the number of FEMALE household members by each of the following age groups:

*Instructions:* The total number of female household members by age group must be recorded as a 2-digit number; see also “Form 3 – Part A - GENERAL HOUSEHOLD INFORMATION”.

<2years: \_\_\_\_\_ ≥2 to <5years: \_\_\_\_\_ ≥5 to <15years: \_\_\_\_\_ ≥15years: \_\_\_\_\_

##### 3 Record the number of MALE household members by each of the following age groups:

*Instructions:* The total number of male household members by age group must be recorded as a 2-digit number; see also “Form 3 – Part A - GENERAL HOUSEHOLD INFORMATION”.

<2years: \_\_\_\_\_ ≥2 to <5years: \_\_\_\_\_ ≥5 to <15years: \_\_\_\_\_ ≥15years: \_\_\_\_\_

#### HEALTHCARE SEEKING BEHAVIOR

##### 4 Record where female/male household members <2years/≥2 to <5years/≥5 to <15years/≥15years of age usually seek healthcare for the following signs/symptoms. Please rate using a range from 1-4.

#### *Instructions:*

- Complete question 4 separately for female and male household members <2years, ≥2 to <5years, ≥5 to <15years and ≥15years of age and circle the sex and age group Q4 was completed for; skip question 4 if there is no female/male household member <2years/ ≥2 to <5years/ ≥5 to <15years/ ≥15years of age.
- Provide an answer to each healthcare option for each sign/symptom; use range 1-4 for rating (1=1<sup>st</sup> choice; 2=2<sup>nd</sup> choice; 3=3<sup>rd</sup> choice; 4=not chosen); enter a code where applicable by using prepared lists (use lists individually prepared for each site to obtain codes); tick “Don’t know” if applicable.

Site \_\_\_\_\_ Subarea \_\_\_\_\_ House number \_\_\_\_\_

Interviewer ID \_\_\_\_\_

| Sign/Symptom                                   | Healthcare options       |      |                          |      |                          |                          |                          |                          |                          |                       |
|------------------------------------------------|--------------------------|------|--------------------------|------|--------------------------|--------------------------|--------------------------|--------------------------|--------------------------|-----------------------|
|                                                | Study-HCF                |      | Other HCF                |      | Physician                | Pharmacy                 | Traditional healer       | Nowhere Self-treatment   | Nowhere Nothing          | Don't know            |
|                                                | Rate                     | Code | Rate                     | Code | Rate                     | Rate                     | Rate                     | Rate                     | Rate                     | Tick                  |
| <b>1 [A]</b> Fever, any                        | O=1<br>O=2<br>O=3<br>O=4 |      | O=1<br>O=2<br>O=3<br>O=4 |      | O=1<br>O=2<br>O=3<br>O=4 | O=1<br>O=2<br>O=3<br>O=4 | O=1<br>O=2<br>O=3<br>O=4 | O=1<br>O=2<br>O=3<br>O=4 | O=1<br>O=2<br>O=3<br>O=4 | <input type="radio"/> |
| <b>2</b> Fever <3days (continuous)             | O=1<br>O=2<br>O=3<br>O=4 |      | O=1<br>O=2<br>O=3<br>O=4 |      | O=1<br>O=2<br>O=3<br>O=4 | O=1<br>O=2<br>O=3<br>O=4 | O=1<br>O=2<br>O=3<br>O=4 | O=1<br>O=2<br>O=3<br>O=4 | O=1<br>O=2<br>O=3<br>O=4 | <input type="radio"/> |
| <b>3</b> Fever ≥3days (continuous)             | O=1<br>O=2<br>O=3<br>O=4 |      | O=1<br>O=2<br>O=3<br>O=4 |      | O=1<br>O=2<br>O=3<br>O=4 | O=1<br>O=2<br>O=3<br>O=4 | O=1<br>O=2<br>O=3<br>O=4 | O=1<br>O=2<br>O=3<br>O=4 | O=1<br>O=2<br>O=3<br>O=4 | <input type="radio"/> |
| <b>4</b> Chills Shivering                      | O=1<br>O=2<br>O=3<br>O=4 |      | O=1<br>O=2<br>O=3<br>O=4 |      | O=1<br>O=2<br>O=3<br>O=4 | O=1<br>O=2<br>O=3<br>O=4 | O=1<br>O=2<br>O=3<br>O=4 | O=1<br>O=2<br>O=3<br>O=4 | O=1<br>O=2<br>O=3<br>O=4 | <input type="radio"/> |
| <b>5</b> Convulsion                            | O=1<br>O=2<br>O=3<br>O=4 |      | O=1<br>O=2<br>O=3<br>O=4 |      | O=1<br>O=2<br>O=3<br>O=4 | O=1<br>O=2<br>O=3<br>O=4 | O=1<br>O=2<br>O=3<br>O=4 | O=1<br>O=2<br>O=3<br>O=4 | O=1<br>O=2<br>O=3<br>O=4 | <input type="radio"/> |
| <b>6</b> Weight loss                           | O=1<br>O=2<br>O=3<br>O=4 |      | O=1<br>O=2<br>O=3<br>O=4 |      | O=1<br>O=2<br>O=3<br>O=4 | O=1<br>O=2<br>O=3<br>O=4 | O=1<br>O=2<br>O=3<br>O=4 | O=1<br>O=2<br>O=3<br>O=4 | O=1<br>O=2<br>O=3<br>O=4 | <input type="radio"/> |
| <b>7</b> Dehydration                           | O=1<br>O=2<br>O=3<br>O=4 |      | O=1<br>O=2<br>O=3<br>O=4 |      | O=1<br>O=2<br>O=3<br>O=4 | O=1<br>O=2<br>O=3<br>O=4 | O=1<br>O=2<br>O=3<br>O=4 | O=1<br>O=2<br>O=3<br>O=4 | O=1<br>O=2<br>O=3<br>O=4 | <input type="radio"/> |
| <b>8</b> Malaise Weakness/ Fatigue             | O=1<br>O=2<br>O=3<br>O=4 |      | O=1<br>O=2<br>O=3<br>O=4 |      | O=1<br>O=2<br>O=3<br>O=4 | O=1<br>O=2<br>O=3<br>O=4 | O=1<br>O=2<br>O=3<br>O=4 | O=1<br>O=2<br>O=3<br>O=4 | O=1<br>O=2<br>O=3<br>O=4 | <input type="radio"/> |
| <b>9</b> Aches/ Pain (muscle/joint/bone)       | O=1<br>O=2<br>O=3<br>O=4 |      | O=1<br>O=2<br>O=3<br>O=4 |      | O=1<br>O=2<br>O=3<br>O=4 | O=1<br>O=2<br>O=3<br>O=4 | O=1<br>O=2<br>O=3<br>O=4 | O=1<br>O=2<br>O=3<br>O=4 | O=1<br>O=2<br>O=3<br>O=4 | <input type="radio"/> |
| <b>10</b> Headache                             | O=1<br>O=2<br>O=3<br>O=4 |      | O=1<br>O=2<br>O=3<br>O=4 |      | O=1<br>O=2<br>O=3<br>O=4 | O=1<br>O=2<br>O=3<br>O=4 | O=1<br>O=2<br>O=3<br>O=4 | O=1<br>O=2<br>O=3<br>O=4 | O=1<br>O=2<br>O=3<br>O=4 | <input type="radio"/> |
| <b>11</b> Dizziness/ Confusion Unconsciousness | O=1<br>O=2<br>O=3<br>O=4 |      | O=1<br>O=2<br>O=3<br>O=4 |      | O=1<br>O=2<br>O=3<br>O=4 | O=1<br>O=2<br>O=3<br>O=4 | O=1<br>O=2<br>O=3<br>O=4 | O=1<br>O=2<br>O=3<br>O=4 | O=1<br>O=2<br>O=3<br>O=4 | <input type="radio"/> |
| <b>12</b> Blood pressure disorders             | O=1<br>O=2<br>O=3<br>O=4 |      | O=1<br>O=2<br>O=3<br>O=4 |      | O=1<br>O=2<br>O=3<br>O=4 | O=1<br>O=2<br>O=3<br>O=4 | O=1<br>O=2<br>O=3<br>O=4 | O=1<br>O=2<br>O=3<br>O=4 | O=1<br>O=2<br>O=3<br>O=4 | <input type="radio"/> |

Site \_\_\_\_\_ Subarea \_\_\_\_\_ House number \_\_\_\_\_

Interviewer ID \_\_\_\_\_

| Sign/Symptom                                                | Healthcare options       |      |                          |      |                          |                          |                          |                          |                          |            |
|-------------------------------------------------------------|--------------------------|------|--------------------------|------|--------------------------|--------------------------|--------------------------|--------------------------|--------------------------|------------|
|                                                             | Study-HCF                |      | Other HCF                |      | Physician                | Pharmacy                 | Traditional healer       | Nowhere Self-treatment   | Nowhere Nothing          | Don't know |
|                                                             | Rate                     | Code | Rate                     | Code | Rate                     | Rate                     | Rate                     | Rate                     | Rate                     | Code       |
| <b>13</b> Heart disorders                                   | O=1<br>O=2<br>O=3<br>O=4 |      | O=1<br>O=2<br>O=3<br>O=4 |      | O=1<br>O=2<br>O=3<br>O=4 | O=1<br>O=2<br>O=3<br>O=4 | O=1<br>O=2<br>O=3<br>O=4 | O=1<br>O=2<br>O=3<br>O=4 | O=1<br>O=2<br>O=3<br>O=4 | ○          |
| <b>14</b> Nausea Vomitting                                  | O=1<br>O=2<br>O=3<br>O=4 |      | O=1<br>O=2<br>O=3<br>O=4 |      | O=1<br>O=2<br>O=3<br>O=4 | O=1<br>O=2<br>O=3<br>O=4 | O=1<br>O=2<br>O=3<br>O=4 | O=1<br>O=2<br>O=3<br>O=4 | O=1<br>O=2<br>O=3<br>O=4 | ○          |
| <b>15</b> Diarrhea (watery/ bloody/ mucopurulent)           | O=1<br>O=2<br>O=3<br>O=4 |      | O=1<br>O=2<br>O=3<br>O=4 |      | O=1<br>O=2<br>O=3<br>O=4 | O=1<br>O=2<br>O=3<br>O=4 | O=1<br>O=2<br>O=3<br>O=4 | O=1<br>O=2<br>O=3<br>O=4 | O=1<br>O=2<br>O=3<br>O=4 | ○          |
| <b>16</b> Abdominal pain Intestinal pain                    | O=1<br>O=2<br>O=3<br>O=4 |      | O=1<br>O=2<br>O=3<br>O=4 |      | O=1<br>O=2<br>O=3<br>O=4 | O=1<br>O=2<br>O=3<br>O=4 | O=1<br>O=2<br>O=3<br>O=4 | O=1<br>O=2<br>O=3<br>O=4 | O=1<br>O=2<br>O=3<br>O=4 | ○          |
| <b>17</b> Blood loss/ Bleeding (internal)                   | O=1<br>O=2<br>O=3<br>O=4 |      | O=1<br>O=2<br>O=3<br>O=4 |      | O=1<br>O=2<br>O=3<br>O=4 | O=1<br>O=2<br>O=3<br>O=4 | O=1<br>O=2<br>O=3<br>O=4 | O=1<br>O=2<br>O=3<br>O=4 | O=1<br>O=2<br>O=3<br>O=4 | ○          |
| <b>18</b> Blood loss/ Bleeding (external)                   | O=1<br>O=2<br>O=3<br>O=4 |      | O=1<br>O=2<br>O=3<br>O=4 |      | O=1<br>O=2<br>O=3<br>O=4 | O=1<br>O=2<br>O=3<br>O=4 | O=1<br>O=2<br>O=3<br>O=4 | O=1<br>O=2<br>O=3<br>O=4 | O=1<br>O=2<br>O=3<br>O=4 | ○          |
| <b>19</b> Sneezing Runny nose                               | O=1<br>O=2<br>O=3<br>O=4 |      | O=1<br>O=2<br>O=3<br>O=4 |      | O=1<br>O=2<br>O=3<br>O=4 | O=1<br>O=2<br>O=3<br>O=4 | O=1<br>O=2<br>O=3<br>O=4 | O=1<br>O=2<br>O=3<br>O=4 | O=1<br>O=2<br>O=3<br>O=4 | ○          |
| <b>20</b> Cough                                             | O=1<br>O=2<br>O=3<br>O=4 |      | O=1<br>O=2<br>O=3<br>O=4 |      | O=1<br>O=2<br>O=3<br>O=4 | O=1<br>O=2<br>O=3<br>O=4 | O=1<br>O=2<br>O=3<br>O=4 | O=1<br>O=2<br>O=3<br>O=4 | O=1<br>O=2<br>O=3<br>O=4 | ○          |
| <b>21</b> Rapid breathing/ shortness of breath              | O=1<br>O=2<br>O=3<br>O=4 |      | O=1<br>O=2<br>O=3<br>O=4 |      | O=1<br>O=2<br>O=3<br>O=4 | O=1<br>O=2<br>O=3<br>O=4 | O=1<br>O=2<br>O=3<br>O=4 | O=1<br>O=2<br>O=3<br>O=4 | O=1<br>O=2<br>O=3<br>O=4 | ○          |
| <b>22</b> Severe breathing/ Difficulties in breathing       | O=1<br>O=2<br>O=3<br>O=4 |      | O=1<br>O=2<br>O=3<br>O=4 |      | O=1<br>O=2<br>O=3<br>O=4 | O=1<br>O=2<br>O=3<br>O=4 | O=1<br>O=2<br>O=3<br>O=4 | O=1<br>O=2<br>O=3<br>O=4 | O=1<br>O=2<br>O=3<br>O=4 | ○          |
| <b>23</b> Skin inflammation (rashes/ redness/ pus/ itching) | O=1<br>O=2<br>O=3<br>O=4 |      | O=1<br>O=2<br>O=3<br>O=4 |      | O=1<br>O=2<br>O=3<br>O=4 | O=1<br>O=2<br>O=3<br>O=4 | O=1<br>O=2<br>O=3<br>O=4 | O=1<br>O=2<br>O=3<br>O=4 | O=1<br>O=2<br>O=3<br>O=4 | ○          |
| <b>24</b> Swelling/ Edema                                   | O=1<br>O=2<br>O=3<br>O=4 |      | O=1<br>O=2<br>O=3<br>O=4 |      | O=1<br>O=2<br>O=3<br>O=4 | O=1<br>O=2<br>O=3<br>O=4 | O=1<br>O=2<br>O=3<br>O=4 | O=1<br>O=2<br>O=3<br>O=4 | O=1<br>O=2<br>O=3<br>O=4 | ○          |
| <b>25</b> Jaundice                                          | O=1<br>O=2<br>O=3<br>O=4 |      | O=1<br>O=2<br>O=3<br>O=4 |      | O=1<br>O=2<br>O=3<br>O=4 | O=1<br>O=2<br>O=3<br>O=4 | O=1<br>O=2<br>O=3<br>O=4 | O=1<br>O=2<br>O=3<br>O=4 | O=1<br>O=2<br>O=3<br>O=4 | ○          |

Site \_\_\_\_\_ Subarea \_\_\_\_\_ House number \_\_\_\_\_

Interviewer ID \_\_\_\_\_

## FORM 4: ASSESSMENT OF OVERALL, AGE- AND SEX-STRATIFIED GENERIC HEALTHCARE UTILIZATION

### Part B – Healthcare-associated factors/Vaccination/Disease perception

#### TRAVEL HEALTHCARE FACILITY

- 1 In case a healthcare facility (HCF) was rated the 1<sup>st</sup> choice of care in question 4A (fever), what is the main mode of transportation, travel time (depending on mode of transportation), travel cost (depending on mode of transportation) and travel distance (depending on mode of transportation) that is usually taken to get there?**

*Instructions:* Enter one code per category and sex as well as age group only. Skip this question if there is no female/male member <2years/≥2 to <5years/≥5 to <15years/≥15years of age in this household (see also question 2 and 3 of this form PartA). Skip this question if no HCF was rated the 1<sup>st</sup> choice of care in question 4A for female/male member <2years/≥2 to <5years/≥5 to <15years/≥15years of age. Record the travel time as minute(s) [min]/ hour(s) [hr], the total costs in USD, including potential gifts, favours and tips, and the total distance as meter(s) [m]/kilometre(s) [km].

| Female                                                |                |                       |           | Male                     |                |                  |           |
|-------------------------------------------------------|----------------|-----------------------|-----------|--------------------------|----------------|------------------|-----------|
| <2 years                                              | ≥2 to <5 years | ≥5 to <15 years       | ≥15 years | <2 years                 | ≥2 to <5 years | ≥5 to <15 years  | ≥15 years |
| <b>1.1 Transportation mode</b>                        |                |                       |           |                          |                |                  |           |
| Code ____                                             | Code ____      | Code ____             | Code ____ | Code ____                | Code ____      | Code ____        | Code ____ |
| [1] Private transportation (i.e. motorbike, car, bus) |                | [3] Walking           |           | [5] Other, specify _____ |                |                  |           |
| [2] Public transportation (i.e. motorbike, car, bus)  |                | [4] Bicycle           |           | [99] Don't know          |                | [98] No response |           |
| <b>1.2 Travel time</b>                                |                |                       |           |                          |                |                  |           |
| Code ____                                             | Code ____      | Code ____             | Code ____ | Code ____                | Code ____      | Code ____        | Code ____ |
| [1] <30 mins                                          |                | [3] ≥1.0 to <2.0 hrs  |           | [5] ≥3.0 to <4.0 hrs     |                | [99] Don't know  |           |
| [2] ≥30 to <60 mins                                   |                | [4] ≥2.0 to <3.0 hrs  |           | [6] ≥4.0 hrs             |                | [98] No response |           |
| <b>1.3 Travel cost</b>                                |                |                       |           |                          |                |                  |           |
| Code ____                                             | Code ____      | Code ____             | Code ____ | Code ____                | Code ____      | Code ____        | Code ____ |
| [1] <1.0 USD                                          |                | [3] ≥3.0 to <5.0 USD  |           | [5] ≥10.0 USD            |                | [99] Don't know  |           |
| [2] ≥1.0 to <3.0 USD                                  |                | [4] ≥5.0 to <10.0 USD |           |                          |                | [98] No response |           |
| <b>1.4 Travel distance</b>                            |                |                       |           |                          |                |                  |           |
| Code ____                                             | Code ____      | Code ____             | Code ____ | Code ____                | Code ____      | Code ____        | Code ____ |
| [1] <500 m                                            |                | [3] ≥1.0 to <2.0 km   |           | [5] ≥3.0 to <4.0 km      |                | [99] Don't know  |           |
| [2] ≥500 m to <1.0 km                                 |                | [4] ≥2.0 to <3.0 km   |           | [6] ≥4.0 km              |                | [98] No response |           |

#### INSURANCE

- 2 For which members of this household does the insurance cover health expenses?**

*Instructions:* Enter one code per category. Skip this question if there is no member <2years/≥2 to <5years/≥5 to <15years/≥15years of age in this household (see question 2 and 3 of this form PartA).

| <2 years   | ≥2 to <5 years | ≥5 to <15 years | ≥15 years        |
|------------|----------------|-----------------|------------------|
| Code _____ | Code _____     | Code _____      | Code _____       |
| [1] Yes    | [2] No         | [99] Don't know | [98] No response |

Site \_\_\_\_\_ Subarea \_\_\_\_\_ House number \_\_\_\_\_

Interviewer ID \_\_\_\_\_

### 3 What kind of health expenses are usually covered by the insurance for members of this household?

*Instructions:* Enter one code by category and age group only. Skip this question if there is no member <2years/≥2 to <5years/≥5 to <15years/≥15years of age in this household (see also question 2 and 3 of this form PartA). Skip this question if there is no insurance that covers health expenses for <2years/≥2 to <5years/≥5 to <15years/≥15years of age.

|                                                                                | <2 years   | ≥2 to <5years | ≥5 to <15years  | ≥15years         |
|--------------------------------------------------------------------------------|------------|---------------|-----------------|------------------|
|                                                                                | [1] Yes    | [2] No        | [99] Don't know | [98] No response |
| <b>1</b> Registration                                                          | Code _____ | Code _____    | Code _____      | Code _____       |
| <b>2</b> Consultation/ Doctor's visit                                          | Code _____ | Code _____    | Code _____      | Code _____       |
| <b>3</b> Physical examination - general                                        | Code _____ | Code _____    | Code _____      | Code _____       |
| <b>4</b> Physical examination – specific, specify _____                        | Code _____ | Code _____    | Code _____      | Code _____       |
| <b>5</b> Diagnostics - general laboratory diagnostics                          | Code _____ | Code _____    | Code _____      | Code _____       |
| <b>6</b> Diagnostics - specific laboratory diagnostics, specify _____          | Code _____ | Code _____    | Code _____      | Code _____       |
| <b>7</b> Diagnostics - general imaging                                         | Code _____ | Code _____    | Code _____      | Code _____       |
| <b>8</b> Diagnostics - specific imaging, specify _____                         | Code _____ | Code _____    | Code _____      | Code _____       |
| <b>9</b> Diagnostics - other, specify _____                                    | Code _____ | Code _____    | Code _____      | Code _____       |
| <b>10</b> Treatment - general medication                                       | Code _____ | Code _____    | Code _____      | Code _____       |
| <b>11</b> Treatment - specific medication, specify _____                       | Code _____ | Code _____    | Code _____      | Code _____       |
| <b>12</b> Treatment - other medication, specify _____                          | Code _____ | Code _____    | Code _____      | Code _____       |
| <b>13</b> Treatment - interventions (other than surgery), specify _____        | Code _____ | Code _____    | Code _____      | Code _____       |
| <b>14</b> Treatment Surgery                                                    | Code _____ | Code _____    | Code _____      | Code _____       |
| <b>15</b> Hospitalization <7days                                               | Code _____ | Code _____    | Code _____      | Code _____       |
| <b>16</b> Hospitalization ≥7days                                               | Code _____ | Code _____    | Code _____      | Code _____       |
| <b>17</b> Emergency services                                                   | Code _____ | Code _____    | Code _____      | Code _____       |
| <b>18</b> Antenatal care                                                       | Code _____ | Code _____    | Code _____      | Code _____       |
| <b>19</b> Postnatal care                                                       | Code _____ | Code _____    | Code _____      | Code _____       |
| <b>20</b> Preventive medicine                                                  | Code _____ | Code _____    | Code _____      | Code _____       |
| <b>21</b> Vaccination                                                          | Code _____ | Code _____    | Code _____      | Code _____       |
| <b>22</b> Home healthcare (i.e. elderly, disabled, chronic/long-term diseased) | Code _____ | Code _____    | Code _____      | Code _____       |
| <b>23</b> Supportive therapy (i.e. physiotherapy, ergotherapy, rehabilitation) | Code _____ | Code _____    | Code _____      | Code _____       |

Site \_\_\_\_\_ Subarea \_\_\_\_\_ House number \_\_\_\_\_

Interviewer ID \_\_\_\_\_

**ETHNOGRAPHY****4 To which religion/ethnic group/tribe belong members of this household?**

*Instructions:* Give one answer by age group only. Skip this question if there is no member >2years/≥2 to <5years/≥5 to <15years/≥15years of age in this household (see also question 2 and 3 of this form PartA).

|                             | <2 years                                                                    | ≥2 to <5years                                                               | ≥5 to <15years                                                              | ≥15years                                                                    |
|-----------------------------|-----------------------------------------------------------------------------|-----------------------------------------------------------------------------|-----------------------------------------------------------------------------|-----------------------------------------------------------------------------|
| Religion/Ethnic group/Tribe | _____                                                                       | _____                                                                       | _____                                                                       | _____                                                                       |
|                             | <input type="radio"/> 99=Don't know<br><input type="radio"/> 98=No response | <input type="radio"/> 99=Don't know<br><input type="radio"/> 98=No response | <input type="radio"/> 99=Don't know<br><input type="radio"/> 98=No response | <input type="radio"/> 99=Don't know<br><input type="radio"/> 98=No response |

**5 Does the religion/ethnic group/tribe as stated in question 4 influence the various aspects of utilization of healthcare for members of this household?**

*Instructions:* Enter one code by category and age group only. Skip this question if there is member >2years/≥2 to <5years/≥5 to <15years/≥15years of age in this household (see also question 2 and 3 of this form PartA).

|                                                                                              | <2 years   | ≥2 to <5years | ≥5 to <15years  | ≥15years         |
|----------------------------------------------------------------------------------------------|------------|---------------|-----------------|------------------|
|                                                                                              | [1] Yes    | [2] No        | [99] Don't know | [98] No response |
| <b>1</b> Visiting a healthcare facility (i.e. hospital, health care center, health post)     | Code _____ | Code _____    | Code _____      | Code _____       |
| <b>2</b> Visiting a physician                                                                | Code _____ | Code _____    | Code _____      | Code _____       |
| <b>3</b> Visiting a pharmacy                                                                 | Code _____ | Code _____    | Code _____      | Code _____       |
| <b>4</b> Visiting a traditional healer                                                       | Code _____ | Code _____    | Code _____      | Code _____       |
| <b>5</b> Deciding for self-treatment                                                         | Code _____ | Code _____    | Code _____      | Code _____       |
| <b>6</b> Deciding for non-treatment                                                          | Code _____ | Code _____    | Code _____      | Code _____       |
| <b>7</b> Physical examination – general                                                      | Code _____ | Code _____    | Code _____      | Code _____       |
| <b>8</b> Physical examination – specific, specify _____                                      | Code _____ | Code _____    | Code _____      | Code _____       |
| <b>9</b> Collection of specimen (i.e. blood, urine, stool, smear, swab, cerebrospinal fluid) | Code _____ | Code _____    | Code _____      | Code _____       |
| <b>10</b> Diagnostics – general laboratory diagnostics                                       | Code _____ | Code _____    | Code _____      | Code _____       |
| <b>11</b> Diagnostics – specific laboratory diagnostics, specify _____                       | Code _____ | Code _____    | Code _____      | Code _____       |
| <b>12</b> Diagnostics - general imaging                                                      | Code _____ | Code _____    | Code _____      | Code _____       |
| <b>13</b> Diagnostics - specific imaging, specify _____                                      | Code _____ | Code _____    | Code _____      | Code _____       |
| <b>14</b> Diagnostics - other, specify _____                                                 | Code _____ | Code _____    | Code _____      | Code _____       |
| <b>15</b> Treatment - general medication                                                     | Code _____ | Code _____    | Code _____      | Code _____       |
| <b>16</b> Treatment - specific medication, specify _____                                     | Code _____ | Code _____    | Code _____      | Code _____       |
| <b>17</b> Treatment - other medication, specify _____                                        | Code _____ | Code _____    | Code _____      | Code _____       |

Site \_\_\_\_\_ Subarea \_\_\_\_\_ House number \_\_\_\_\_

Interviewer ID \_\_\_\_\_

|                                                                                |            |            |            |            |
|--------------------------------------------------------------------------------|------------|------------|------------|------------|
| <b>18</b> Treatment - interventions (other than surgery), specify _____        | Code _____ | Code _____ | Code _____ | Code _____ |
| <b>19</b> Treatment - Surgery                                                  | Code _____ | Code _____ | Code _____ | Code _____ |
| <b>20</b> Hospitalization <7days                                               | Code _____ | Code _____ | Code _____ | Code _____ |
| <b>21</b> Hospitalization ≥7days                                               | Code _____ | Code _____ | Code _____ | Code _____ |
| <b>22</b> Emergency services                                                   | Code _____ | Code _____ | Code _____ | Code _____ |
| <b>23</b> Antenatal care                                                       | Code _____ | Code _____ | Code _____ | Code _____ |
| <b>24</b> Postnatal care                                                       | Code _____ | Code _____ | Code _____ | Code _____ |
| <b>25</b> Preventive medicine                                                  | Code _____ | Code _____ | Code _____ | Code _____ |
| <b>26</b> Vaccination                                                          | Code _____ | Code _____ | Code _____ | Code _____ |
| <b>27</b> Home healthcare (i.e. elderly, disabled, chronic/long-term diseased) | Code _____ | Code _____ | Code _____ | Code _____ |
| <b>28</b> Supportive therapy (i.e. physiotherapy, ergotherapy, rehabilitation) | Code _____ | Code _____ | Code _____ | Code _____ |

**VACCINATION**

**6 How were children of this household fed during the first six months of life?**

*Instructions:* Skip this question if there are no male/female children in this household (see also question 2 and 3 of this form PartA).

- 1=Breastfed exclusively
- 2=Breastfed and other feeds, specify \_\_\_\_\_
- 3=Formula and other feeds, specify \_\_\_\_\_
- 4=Breastfed and formula
- 5=Formula exclusively
- 6=Other, specify \_\_\_\_\_
- 99=Don't know
- 98=No response

**7 Which water source was usually used to prepare formula or formula and other feeds as stated in question 6 for children of this household?**

*Instructions:* Skip this question if there are no children in this household (see also question 2 and 3 of this form PartA).

- 1=Tap water (inside the house; private)
- 2=Tap water (outside the house i.e. back-/courtyard; private)
- 3=Tap water (outside the house; public, shared)
- 4=Standpipe/Piped water (inside the house; private)
- 5=Standpipe/Piped water (outside the house i.e. back-/courtyard; private)
- 6=Standpipe/Piped water (outside the house; public, shared)
- 7=Water truck (public; shared)
- 8=Bottled water
- 9=Surface water (i.e. lake, pond, river, stream)
- 10=Surface water (i.e. canal, irrigation canal)
- 11=Spring water
- 12=Rain water
- 13=Well/Borehole (open/uncovered/unprotected)
- 14=Well/Borehole (covered/protected)
- 15=NO FORMULA/OTHER FEEDS PREPARED
- 16=Other, specify \_\_\_\_\_
- 99=Don't know
- 98=No response

**8 Did children of this household receive any vaccines since birth, including the birth vaccines?**

*Instructions:* Enter one code by category and child only. Skip this question if there are no children in this household (see also question 2 and 3 of this form PartA). Refer to question 9 of "Form 3 Part A – Demographic data/General household information" and record the initials/identifier of the member(s).

|                                       |                                       |                                       |                                       |
|---------------------------------------|---------------------------------------|---------------------------------------|---------------------------------------|
| Child 1<br>Initials/Identifier: _____ | Child 2<br>Initials/Identifier: _____ | Child 3<br>Initials/Identifier: _____ | Child 4<br>Initials/Identifier: _____ |
|---------------------------------------|---------------------------------------|---------------------------------------|---------------------------------------|



Site \_\_\_\_\_ Subarea \_\_\_\_\_ House number \_\_\_\_\_

Interviewer ID \_\_\_\_\_

|                                                                                                                                                     |                                       |                              |                  |
|-----------------------------------------------------------------------------------------------------------------------------------------------------|---------------------------------------|------------------------------|------------------|
| [1] YES, vaccinated                                                                                                                                 | [5] No, lack of vaccine               | [9] No, HCF busy             |                  |
| [2] No, caretaker busy                                                                                                                              | [6] No, child too old/young           | [10] No, child sick          |                  |
| [3] No, caretaker decided no need                                                                                                                   | [7] No, caretaker refused/too worried | [11] No, no vaccination card |                  |
| [4] No, unknown where to go                                                                                                                         | [8] No, other, specify _____          | [99] Don't know              | [98] No response |
| <b>8.1 Diphtheria and Tetanus and Pertussis and <i>Haemophilus influenza</i> and Hepatitis B vaccine/DTwPHibHepB</b> (e.g. 6/8, 10/12, 14/16 weeks) |                                       |                              |                  |
| Code _____                                                                                                                                          | Code _____                            | Code _____                   | Code _____       |
| <b>8.2 Tetanus toxoid (TT)</b> (e.g. 1st contact pregnancy, 1, 6, 12/24 months)                                                                     |                                       |                              |                  |
| Code _____                                                                                                                                          | Code _____                            | Code _____                   | Code _____       |
| <b>8.3 Tetanus and diphtheria toxoid (TD)</b> (e.g. 1st contact pregnancy, 1, 6, 12 months)                                                         |                                       |                              |                  |
| Code _____                                                                                                                                          | Code _____                            | Code _____                   | Code _____       |
| <b>8.4 Tuberculosis/BCG</b> (at birth)                                                                                                              |                                       |                              |                  |
| Code _____                                                                                                                                          | Code _____                            | Code _____                   | Code _____       |
| <b>8.5 Rotavirus/RV</b> (e.g. 6/8, 10/12, 16 weeks)                                                                                                 |                                       |                              |                  |
| Code _____                                                                                                                                          | Code _____                            | Code _____                   | Code _____       |
| <b>8.6 Measles/Measles and Rubella (MR)</b> (e.g. 9, 15/18months)                                                                                   |                                       |                              |                  |
| Code _____                                                                                                                                          | Code _____                            | Code _____                   | Code _____       |
| <b>8.7 Polio/OPV</b> (e.g. birth, 6/8, 10/12, 14/16 weeks)                                                                                          |                                       |                              |                  |
| Code _____                                                                                                                                          | Code _____                            | Code _____                   | Code _____       |
| <b>8.8 Pneumococcus/PCV</b> (e.g. 6/8, 10/12, 14/16 weeks)                                                                                          |                                       |                              |                  |
| Code _____                                                                                                                                          | Code _____                            | Code _____                   | Code _____       |
| <b>8.9 Yellow fever (YF)</b> (e.g. 9 months)                                                                                                        |                                       |                              |                  |
| Code _____                                                                                                                                          | Code _____                            | Code _____                   | Code _____       |
| <b>8.10 Other Vaccines</b>                                                                                                                          |                                       |                              |                  |
| Specify, _____                                                                                                                                      | Specify, _____                        | Specify, _____               | Specify, _____   |
| Specify, _____                                                                                                                                      | Specify, _____                        | Specify, _____               | Specify, _____   |
| Specify, _____                                                                                                                                      | Specify, _____                        | Specify, _____               | Specify, _____   |
| Specify, _____                                                                                                                                      | Specify, _____                        | Specify, _____               | Specify, _____   |

Site \_\_\_\_\_ Subarea \_\_\_\_\_ House number \_\_\_\_\_ Interviewer ID \_\_\_\_\_

**DISEASE PERCEPTION**

**9 Knowledge, perception, causes and prevention of common infectious diseases**

| <b>Disease</b>          | <b>9.1 Disease known by household members?</b><br>[1] Yes<br>[2] No<br>[99] Don't know<br>[98] No response | <b>9.2 Perception of disease by household members?</b><br><i>Instruction: Describe briefly if known.</i> | <b>9.3 Causes for disease known by household members?</b><br><i>Instructions: Enter all codes (list A) that apply; more than one answer is possible.</i> | <b>9.4 Measures to prevent disease known by household members?</b><br><i>Instructions: Enter all codes (list B) that apply; more than one answer is possible.</i> | <b>9.5 Measures to prevent disease utilized by household members?</b><br><i>Instructions: Enter all codes (list B) that apply; more than one answer is possible.</i> |
|-------------------------|------------------------------------------------------------------------------------------------------------|----------------------------------------------------------------------------------------------------------|----------------------------------------------------------------------------------------------------------------------------------------------------------|-------------------------------------------------------------------------------------------------------------------------------------------------------------------|----------------------------------------------------------------------------------------------------------------------------------------------------------------------|
| <b>A. Typhoid fever</b> | Code _____                                                                                                 |                                                                                                          | Code _____                                                                                                                                               | Code _____                                                                                                                                                        | Code _____                                                                                                                                                           |
| <b>B. Cholera</b>       | Code _____                                                                                                 |                                                                                                          | Code _____                                                                                                                                               | Code _____                                                                                                                                                        | Code _____                                                                                                                                                           |
| <b>C. Malaria</b>       | Code _____                                                                                                 |                                                                                                          | Code _____                                                                                                                                               | Code _____                                                                                                                                                        | Code _____                                                                                                                                                           |
| <b>D. Influenza</b>     | Code _____                                                                                                 |                                                                                                          | Code _____                                                                                                                                               | Code _____                                                                                                                                                        | Code _____                                                                                                                                                           |
| <b>E. Meningitis</b>    | Code _____                                                                                                 |                                                                                                          | Code _____                                                                                                                                               | Code _____                                                                                                                                                        | Code _____                                                                                                                                                           |
| <b>F. Hepatitis E</b>   | Code _____                                                                                                 |                                                                                                          | Code _____                                                                                                                                               | Code _____                                                                                                                                                        | Code _____                                                                                                                                                           |
| <b>G. Tuberculosis</b>  | Code _____                                                                                                 |                                                                                                          | Code _____                                                                                                                                               | Code _____                                                                                                                                                        | Code _____                                                                                                                                                           |
| <b>H. HIV/AIDS</b>      | Code _____                                                                                                 |                                                                                                          | Code _____                                                                                                                                               | Code _____                                                                                                                                                        | Code _____                                                                                                                                                           |

| <b>List A: Possible causes</b>                                                                | <b>List B: Possible preventive measures</b>                                                                                                                       |
|-----------------------------------------------------------------------------------------------|-------------------------------------------------------------------------------------------------------------------------------------------------------------------|
| [1] Alcohol consumption<br>[2] Weather/witchcraft<br>[3] Mosquito/insect bite<br>[4] Dog bite | [1] No alcohol consumption<br>[2] Sleeping under bed net<br>[3] Using mosquito/insect spray<br>[4] Maintain a clean house and immediate surroundings of the house |

Site \_\_\_\_\_ Subarea \_\_\_\_\_ House number \_\_\_\_\_ Interviewer ID \_\_\_\_\_

|                                                                                                      |                                                                                                                              |
|------------------------------------------------------------------------------------------------------|------------------------------------------------------------------------------------------------------------------------------|
| [5] Drinking untreated surface/spring water (i.e. lake, pond, river, stream, canal/irrigation canal) | [5] Practice proper disposal of human and domestic waste                                                                     |
| [6] Close body contact/kissing/hugging                                                               | [6] Avoiding close contact to dogs                                                                                           |
| [7] Eating raw food items such as vegetables/lettuce, fruits, dairy products, eggs, meat or fish     | [7] Treating water (i.e. boiling, filtration, solar disinfection, sedimentation, chlorination)                               |
| [8] Not cleaning hands properly when preparing food/meals                                            | [8] Not cooking/preparing food/meals with untreated water                                                                    |
| [9] Not cleaning hands properly before/after visiting a toilet                                       | [9] Not washing food items to be consumed raw with untreated water                                                           |
| [10] Contact to human blood (i.e. injection, transfusion, surgery)                                   | [10] Re-boiling/re-heating left-over/prepared food/meals prior to consumption                                                |
| [11] Consuming raw animal blood                                                                      | [11] Not eating raw food items such as vegetables/lettuce, fruits, dairy products, eggs, meat or fish                        |
| [12] Other, specify _____                                                                            | [12] Cover food items/meals                                                                                                  |
| [99] Don't know                                                                                      | [13] Protect food items/meals from flies                                                                                     |
| [98] No response                                                                                     | [14] Avoid food/beverage from street vendors                                                                                 |
|                                                                                                      | [15] Avoid close contact to sick people                                                                                      |
|                                                                                                      | [16] No close body contact/kissing/hugging                                                                                   |
|                                                                                                      | [17] Covering nose/mouth while sneezing/coughing                                                                             |
|                                                                                                      | [18] No contact/consumption of human/animal blood                                                                            |
|                                                                                                      | [19] Practicing proper hand hygiene when preparing food/meals (i.e. washing hands with soap and water, rub hands clean)      |
|                                                                                                      | [20] Practicing proper hand hygiene before/after visiting a toilet (i.e. washing hands with soap and water, rub hands clean) |
|                                                                                                      | [21] Other, specify _____                                                                                                    |
|                                                                                                      | [99] Don't know                                                                                                              |
|                                                                                                      | [98] No response                                                                                                             |

Peer review only

Site \_\_\_\_\_ Subarea \_\_\_\_\_ House number \_\_\_\_\_

Interviewer ID \_\_\_\_\_

**10 For which members of this household are the preventive measures as listed in question 9.5 against typhoid fever used?***Instructions:* Tick all that applies; more than one answer is possible.

- 1=<2years       3= $\geq$ 5 to <15years       5=NOT USED       99=Don't know  
 2= $\geq$ 2 to < 5years       4= $\geq$ 15years       98=No response

**11 Name the household members that were diagnosed with typhoid fever during the past 3 months. Which diagnostics were used to confirm typhoid fever?***Instructions:* Enter all codes that apply for each household member; more than one answer is possible.

| Member 1<br>Initials/Identifier: _____ | Member 2<br>Initials/Identifier: _____ | Member 3<br>Initials/Identifier: _____                | Member 4<br>Initials/Identifier: _____ |
|----------------------------------------|----------------------------------------|-------------------------------------------------------|----------------------------------------|
| [1] Blood culture                      | [3] Blood/Widal test                   | [5] Not applicable (not diagnosed with typhoid fever) |                                        |
| [2] Stool culture                      | [4] Other test, specify _____          | [99] Don't know                                       | [98] No response                       |
| Code _____                             | Code _____                             | Code _____                                            | Code _____                             |

**12 (Where were members of this household recorded in question 11 diagnosed for typhoid fever?) Where did members of this household seek care?***Instructions:* Enter one code by household member only.

| Member 1<br>Initials/Identifier: _____ | Member 2<br>Initials/Identifier: _____ | Member 3<br>Initials/Identifier: _____ | Member 4<br>Initials/Identifier: _____ |
|----------------------------------------|----------------------------------------|----------------------------------------|----------------------------------------|
| [1] Healthcare facility, specify _____ | [6] Nowhere, did not seek care         |                                        |                                        |
| [2] Physician                          | [7] Other, specify _____               |                                        |                                        |
| [3] Nowhere, self-treatment            | [8] Not applicable                     |                                        |                                        |
| [4] Traditional healer                 | [99] Don't know                        |                                        |                                        |
| [5] Pharmacy                           | [98] No response                       |                                        |                                        |
| Code _____                             | Code _____                             | Code _____                             | Code _____                             |

**13 (Did members of this household that were diagnosed with typhoid fever as recorded in question 11 get any treatment?) Which treatment did they get?***Instructions:* Tick one answer by household member only.

| Member 1<br>Initials/Identifier: _____           | Member 2<br>Initials/Identifier: _____           | Member 3<br>Initials/Identifier: _____           | Member 4<br>Initials/Identifier: _____           |
|--------------------------------------------------|--------------------------------------------------|--------------------------------------------------|--------------------------------------------------|
| <input type="radio"/> 1=Treatment, specify _____ | <input type="radio"/> 1=Treatment, specify _____ | <input type="radio"/> 1=Treatment, specify _____ | <input type="radio"/> 1=Treatment, specify _____ |
| <input type="radio"/> 2=Not applicable           | <input type="radio"/> 2=Not applicable           | <input type="radio"/> 2=Not applicable           | <input type="radio"/> 2=Not applicable           |
| <input type="radio"/> 99=Don't know              | <input type="radio"/> 99=Don't know              | <input type="radio"/> 99=Don't know              | <input type="radio"/> 99=Don't know              |
| <input type="radio"/> 98=No response             | <input type="radio"/> 98=No response             | <input type="radio"/> 98=No response             | <input type="radio"/> 98=No response             |

Site \_\_\_\_\_ Subarea \_\_\_\_\_ House number \_\_\_\_\_

Interviewer ID \_\_\_\_\_

## FORM 5: ASSESSMENT OF OVERALL, AGE-AND SEX-STRATIFIED ACTUAL HEALTHCARE UTILIZATION

### HEALTHCARE SEEKING BEHAVIOR

- 1 Record below any occurrence of a sign(s)/ a symptom(s) (see List 1) and specify where (see List 2) and how often a member/members sought healthcare during the past 3 months?**

*Instructions:* See "Form 3 - Part A - GENERAL HOUSEHOLD INFORMATION" to obtain the initials/identifier of each household member. Indicate one sign/symptom per line only. Start a new line if different healthcare options were selected for recurring signs/symptoms. Indicate the number of occurrences for each sign/symptom during the past 3 months. If a different healthcare option was taken for a recurring sign/symptom, indicate this on a new line. Please complete an additional form if >20 occurrences took place during the past 3 months.

| List 1:<br>Sign/Symptom                                                                                                                                                                                                                                                                                                                                         | List 2:<br>Healthcare option                                                                                                                                                                                                                                                                                                                                                                                                    |
|-----------------------------------------------------------------------------------------------------------------------------------------------------------------------------------------------------------------------------------------------------------------------------------------------------------------------------------------------------------------|---------------------------------------------------------------------------------------------------------------------------------------------------------------------------------------------------------------------------------------------------------------------------------------------------------------------------------------------------------------------------------------------------------------------------------|
| [A] Fever, any<br>[B] Fever <3days (continuous)<br>[C] Fever ≥3days (continuous)<br>[D] Chills/ Shivering<br>[E] Convulsion<br>[F] Weight loss<br>[G] Dehydration<br>[H] Malaise/ Weakness/ Fatigue<br>[I] Aches/Pain (muscle/joint/bone)<br>[J] Headache<br>[K] Dizziness/Confusion/<br>Unconsciousness<br>[L] Blood pressure disorders<br>[M] Heart disorders | [N] Nausea/ Vomiting<br>[O] Diarrhea (watery/bloody/mucopurulent)<br>[P] Abdominal pain/ Intestinal pain<br>[Q] Blood loss/ Bleeding (internal)<br>[R] Blood loss/ Bleeding (external)<br>[S] Sneezing/ Runny nose<br>[T] Cough<br>[U] Rapid breathing/ Shortness of breath<br>[V] Severe breathing/ Difficulties in breathing<br>[W] Skin inflammation (rashes/redness/<br>pus/itching)<br>[X] Swelling/ Edema<br>[Y] Jaundice |
|                                                                                                                                                                                                                                                                                                                                                                 | [1] Study-HCF,<br>Code _____<br>[2] Other HCF,<br>Code _____<br>[3] Physician<br>[4] Pharmacy<br>[5] Traditional healer<br>[6] Nowhere/Self-<br>treatment<br>[7] Nowhere/Nothing                                                                                                                                                                                                                                                |

| No. | Household member<br>Record the initials/identifier of a household member; see "Form 3 - Part A - GENERAL HOUSEHOLD INFORMATION" | Sign/<br>Symptom<br>Use List 1 to select a code | Healthcare option           |          | Frequency<br>Indicate the number of incidences for the sign/symptom listed |
|-----|---------------------------------------------------------------------------------------------------------------------------------|-------------------------------------------------|-----------------------------|----------|----------------------------------------------------------------------------|
|     |                                                                                                                                 |                                                 | Use List 2 to select a code | HCF code |                                                                            |
| 1   |                                                                                                                                 |                                                 |                             |          |                                                                            |
| 2   |                                                                                                                                 |                                                 |                             |          |                                                                            |
| 3   |                                                                                                                                 |                                                 |                             |          |                                                                            |
| 4   |                                                                                                                                 |                                                 |                             |          |                                                                            |
| 5   |                                                                                                                                 |                                                 |                             |          |                                                                            |
| 6   |                                                                                                                                 |                                                 |                             |          |                                                                            |
| 7   |                                                                                                                                 |                                                 |                             |          |                                                                            |
| 8   |                                                                                                                                 |                                                 |                             |          |                                                                            |
| 9   |                                                                                                                                 |                                                 |                             |          |                                                                            |

Site \_\_\_\_\_ Subarea \_\_\_\_\_ House number \_\_\_\_\_ Interviewer ID \_\_\_\_\_

|    |  |  |  |  |  |
|----|--|--|--|--|--|
| 10 |  |  |  |  |  |
| 11 |  |  |  |  |  |
| 12 |  |  |  |  |  |
| 13 |  |  |  |  |  |
| 14 |  |  |  |  |  |
| 15 |  |  |  |  |  |
| 16 |  |  |  |  |  |
| 17 |  |  |  |  |  |
| 18 |  |  |  |  |  |
| 19 |  |  |  |  |  |
| 20 |  |  |  |  |  |

For peer review only

### Appendix 3/Supplementary file 3: Protocol, Definitions/Terminology and Study Forms (French)

#### Protocol

#### Évaluation du comportement de santé et d'autres facteurs démographiques: une étude standardisée dans plusieurs cohortes en Afrique subsaharienne

##### Abstrait

**Introduction** L'objectif de l'étude HPAfrica est de déterminer les comportements sanitaires et autres facteurs démographiques, y compris les facteurs socio-économiques, ethnographiques aussi bien que d'hygiène et d'assainissement sur les sites d'étude du programme Fièvre Typhoïde Sévère en Afrique (SETA). L'objectif du programme SETA est d'enquêter sur la surveillance de la fièvre au niveau des établissements de soins de santé au Burkina Faso, en République Démocratique du Congo (RDC), en Éthiopie, au Ghana, à Madagascar et au Nigéria. Les estimations précises de la charge de morbidité nécessitent un ajustement des styles de comportements sanitaires, qui sont supposés varier au sein d'une population d'étude.

**Méthodes** Pour la taille d'échantillon minimale requise, les hypothèses d'une population infinie, d'un effet de plan et d'une stratification par âge et sexe sont considérées. En l'absence d'un cadre d'échantillonnage ou d'une liste de ménages, une approche géospatiale sera utilisée pour générer des points aléatoires géographiques avec un outil ArcGIS (Aeronautical Reconnaissance Coverage Geographic Information System). Les impressions de l'imagerie satellite Google Earth Pro® visualisent ces points. Les données d'intérêt seront évaluées au niveau des ménages en différentes saisons en appliquant un échantillonnage simple, stratifié en fonction du poids. Une application basée sur Android et un service Web ont été mis au point pour la capture de données électroniques et la synchronisation avec le serveur de base de données sur Internet en temps réel. Cela permet la documentation de données simultanée.

**Analyse** Des analyses de données descriptives seront effectuées afin d'évaluer les informations de base sur / à propos de chaque population d'étude HPAfrica et le comportement santé stratifié par âge et par sexe. Ceci permettra d'ajuster les estimations de la charge de morbidité. En outre, des analyses multivariées seront appliquées pour examiner les associations entre le comportement santé, les facteurs démographiques et la charge de morbidité (fardeau de la maladie) trouvée dans l'étude SETA.

##### Défis attendus

- La normalisation dans la recherche multi-pays /-site à base communautaire nécessite de la prudence compte tenu des variations de cadre, de langue et de culture.
- Les données de population actuelles dans les sites d'étude et leurs sous-zones définies administrativement sont supposées être limitées.
- L'accessibilité aux ménages peut être compliqué par des facteurs environnementaux.
- La collecte de données électroniques peut entraîner problèmes techniques liés aux dommages, aux pannes fonctionnelles ou à la perte de dispositifs.
- Une connexion Internet sans fil instable peut limiter les équipes de données à mettre à jour l'application basée sur Android, communiquer en temps réel avec les responsables de l'étude et à synchroniser les données collectées avec le serveur.

##### Ethics References

- Comité d'Examen Institutionnel d'IVI, No. 2015-006
- Institute de Médecine Tropicale d'Antwerp, Comité d'Examen, Belgique
- Universiteit Antwerpen, Comite voor medische Ethiek, Belgique
- Ministère de la Santé du Burkina Faso – Comité d'Ethique pour la Recherche en Santé, Burkina Faso
- Comité d'Ethique de l'Ecole de Santé Publique de l'Université de Kinshasa, République Démocratique du Congo

- Comité National d'Examen de l'Éthique de la Recherche, Ministère des Sciences et de la Technologie, République Fédérale Démocratique d'Éthiopie
- Comité d'Éthique de l'AHRI-ALERT, République Fédérale Démocratique d'Éthiopie
- Kwame Nkrumah Université des Sciences et de la Technologie, École des Sciences Médicales/Hôpital Universitaire Komfo Anokye, Comité de la Recherche humaine, de la Publication et de l'Éthique, Ghana
- Ministère de la Santé du République de Madagascar – Comité d'Éthique
- Comité d'Éthique de l'Université d'Idadan/ Hôpital du Collège Universitaire/Comité de l'Éthique, Ibadan, Nigéria

**Mots clés:** comportement santé/hygiénique, assainissement, socio-économique, sélection aléatoire géospatiale, Afrique subsaharienne, HPAfrica étude

### Contexte

L'évaluation du comportement de santé, y compris l'utilisation des soins de santé, est un déterminant important pour la production d'estimations précises du fardeau de la maladie parmi les populations cibles. Ceci est particulièrement important pour les études qui utilisent un modèle de surveillance observationnelle basé sur les établissements de santé, car une variation substantielle des comportements de santé influence fortement les estimations de la maladie (1, 2). L'ajustement des calculs de la maladie pour des variations du comportement en matière de santé augmentera l'exactitude de la prévalence des maladies causées par des pathogènes bactériens, fongiques, viraux ou parasitaires parmi la population étudiée. De plus, l'influence d'une grande variété de facteurs basés sur la population sur le comportement en matière de santé et le fardeau de la maladie a été reconnue. Cela inclut des facteurs socioéconomiques tels que l'éducation, la profession, le revenu, la disponibilité des biens des ménages (3, 4), les facteurs ethniques / religieux et culturels (5, 6), mais aussi l'hygiène et l'assainissement (7-11) - (14), et les contacts avec des animaux (10).

L'étude **Health Population Africa** (HPAfrica) sera menée au Burkina Faso, en République démocratique du Congo (RDC), en Éthiopie, au Ghana, à Madagascar et au Nigéria (Tableau 1). Les expériences du programme Typhoid Fever Surveillance in Africa Program (TSAP) seront reportées sur le programme Severe Typhoid in Africa (SETA) (15, 16). Dans ce programme, une surveillance standardisée de la fièvre, basée sur les établissements de santé, est effectuée sur des sites d'étude sélectionnés dans les pays participants sur une période de deux ans (17). SETA vise principalement à collecter systématiquement des informations sur le fardeau des infections graves à *Salmonella*. Les sujets vivant dans la zone de chalandise définie, avec un épisode de fièvre aiguë, des antécédents de fièvre  $\geq 3$  jours consécutifs, une fièvre typhoïde cliniquement soupçonnée ou des perforations gastro-intestinales cliniquement diagnostiquées dues à la fièvre typhoïde seront éligibles. En outre, la sévérité des maladies provoquées par *Salmonella* et l'histoire naturelle de l'infection à *Salmonella* seront enregistrées avec des analyses supplémentaires sur les réponses immunitaires de l'hôte et le portage chronique.

### Objectifs et Résultats

L'objectif de l'étude HPAfrica est d'évaluer le comportement de santé générique et réel stratifié par âge et par sexe. Le comportement générique se rapporte au comportement associé à la fièvre et à d'autres signes et symptômes sans l'apparition, alors que le comportement réel est lié à l'apparition (Formulaire 4 Partie A, Formulaire 5). Les données sont utilisées pour ajuster les incidences d'agents pathogènes infectieux stratifiés selon l'âge et le sexe pour la proportion d'une population étudiée non capturée par les activités de HPAfrica. Les données documentaires pour divers signes et symptômes ou une combinaison de ceux-ci sont utilisés pour une classification progressive de l'utilisation des soins de santé en fonction de la gravité de la maladie.

L'étude HPAfrica recueillera des données sur les facteurs associés aux soins de santé, tels que les modalités de voyage, la possession d'une assurance maladie, les facteurs culturels/ethnographiques, l'état vaccinal des enfants (18, 19) et la fréquence et la perception individuelle des maladies (Formulaire



4 Partie B). Les données démographiques (Formulaire 3 Partie A) seront utilisés pour la stratification par âge et sexe de la population étudiée qui est nécessaire pour calculer les facteurs d'ajustement pour les incidences de la maladie. Les données socio-économiques (Formulaire 3 Partie B) seront utilisées pour calculer les indices de richesse pour les approches descriptives et analytiques des populations étudiées. Les informations sur l'hygiène et l'assainissement (Formulaire 3 Partie C) peuvent permettre une meilleure compréhension de l'occurrence et de la fréquence des agents pathogènes identifiés parmi les populations étudiées.

## Méthodes

### Sites d'étude

Les limites de chaque site seront définies en utilisant des indications préexistantes qui avaient été déterminées par les autorités statistiques ou ministères de la santé (Tableau 1). L'examen rétrospectif des dossiers (registres/archives) de des deux dernières années aux établissements de soins de santé de recrutement permettra de redéfinir les limites du site. On s'attend à ce que cette revue révèle les résidences ou au moins les zones résidentielles administratives plus larges telles que des communautés, des districts ou des villages de patients qui ont cherché des soins de santé pour une raison quelconque. Des cartes et des images satellites peuvent être utilisées pour mieux visualiser les résidences des patients et les limites générales, y compris les sous-zones définies géographiquement ou administrativement de chaque site. Là où les limites ne peuvent être clairement définies, des facteurs supplémentaires, tels que la distance à un établissement de soins de santé de recrutement, peuvent être pris en compte.

### Taille d'échantillons

Toutes les sources disponibles seront utilisées pour recueillir des données sur la population le plus à jour stratifiées selon l'âge et le sexe par site d'étude et par les sous-zones définies administrativement ou géographiquement. Cela peut inclure les dernières informations démographiques issues d'un recensement de la population ou d'un DSS (Demographic Surveillance System) / HDSS (Health and Demographic Surveillance System). Les chiffres de population et les facteurs de croissance de la population, s'ils sont disponibles, peuvent également être utilisés.

Le nombre minimum de ménages sélectionnés au hasard sera calculé en utilisant l'équation basée de précision (équation-I) (20-23) en supposant une population infinie et en considérant un effet de design (design effect, DEFF), y compris les hypothèses qui l'accompagnent:

#### Equation-I: Calcul de la taille d'échantillon basé sur la précision pour une population infinie (20-23):

$$n_0 = DEFF \cdot \left[ z^2_{1-\alpha/2} \cdot \frac{4 \cdot p \cdot (1-p)}{d^2} \right]$$

#### Hypothèses d'Equation-I

|                  |                                                                                                                                                                                                                               |
|------------------|-------------------------------------------------------------------------------------------------------------------------------------------------------------------------------------------------------------------------------|
| $n_0$            | Nombre minimum de ménages à interroger dans une zone d'étude en supposant une population infinie                                                                                                                              |
| DEFF             | Effect de design; fixé à 1.5                                                                                                                                                                                                  |
| $z_{1-\alpha/2}$ | Déviation Standard correspondant à un intervalle de confiance de 95% (1.96 pour alpha de 0.05)                                                                                                                                |
| d                | Précision (erreur acceptable); estimation de point; fixé à 0.2                                                                                                                                                                |
| p                | Proportion de la population de l'étude devant se rendre dans un établissement de soins de santé de recrutement pour des conditions associées à de la fièvre et d'autres signes et symptômes (proportion capturée); fixé à 0.2 |
| 1-p              | Proportion de la population de l'étude ne devant se rendre dans un établissement de soins de santé de recrutement pour des conditions associées à de la fièvre et d'autres signes et symptômes (proportion non capturée)      |

L'effet de design est un facteur d'ajustement pour le regroupement naturel des comportements de santé au sein des membres d'un ménage (21). Il est défini de façon arbitraire à 1,5 selon la taille du ménage puisqu'aucune estimation exacte n'est disponible (24, 25). Une proportion  $p$  de 0,2 pourra être considérée si aucune autre estimation n'est disponible ou  $p$  pourra être basé sur les expériences au cours de l'étude TSAP: Madagascar, Isotry :  $p=0,01$ , Burkina Faso, Polesgo:  $p=0,9$  (26). Combiner tous les hypothèses dans l'équation-I va avoir pour résultat un nombre global minimum ( $n_0$ ) de 92 ménages à interroger à chaque site.

En outre,  $n_0$  pourra être pris en compte pour la répartition par âge et sexe de chaque population de l'étude représentée par  $\hat{p}$ , la proportion minimum supposée de stratification par groupe d'âge (<5 ans, ≥5 à <15 ans, ≥15 ans). Le facteur  $\hat{p}$  pourra être défini de façon arbitraire à 0,2 ou être basé sur les expériences précédentes: Éthiopie, Butajira :  $\hat{p}=0,09$ , Burkina Faso, Polesgo :  $\hat{p}=0,23$  (26). Appliquer  $\hat{p}$  à l'Equation-I pour une distribution binomiale, y compris ses postulats connexes, aura pour résultat le nombre minimum de ménages à interroger stratifié selon l'âge (Equation-II):

### Equation-II: Calcul de la taille d'échantillon basé sur la précision pour une population infinie avec stratification selon l'âge:

$$\bar{n}_0 = \left( DEFF \cdot \left[ z^2_{1-\alpha/2} \cdot \frac{4 \cdot p \cdot (1-p)}{d^2} \right] \right) / \hat{p}$$

#### Hypothèses d'Equation-II

|                  |                                                                                                                                                                                                                               |
|------------------|-------------------------------------------------------------------------------------------------------------------------------------------------------------------------------------------------------------------------------|
| $\bar{n}_0$      | Nombre minimum de ménages à interroger dans une zone d'étude en supposant une population infinie et une stratification selon l'âge                                                                                            |
| DEFF             | Effect de design; fixé à 1.5                                                                                                                                                                                                  |
| $z_{1-\alpha/2}$ | Déviations Standard correspondant à un intervalle de confiance de 95% (1.96 pour alpha de 0.05)                                                                                                                               |
| $d$              | Précision (erreur acceptable); estimation de point; fixé à 0.2                                                                                                                                                                |
| $p$              | Proportion de la population de l'étude devant se rendre dans un établissement de soins de santé de recrutement pour des conditions associées à de la fièvre et d'autres signes et symptômes (proportion capturée); fixé à 0.2 |
| $1-p$            | Proportion de la population de l'étude ne devant se rendre dans un établissement de soins de santé de recrutement pour des conditions associées à de la fièvre et d'autres signes et symptômes (proportion non capturée)      |
| $\hat{p}$        | Proportion minimum de stratification par groupe d'âge, définie à 0,2                                                                                                                                                          |

Les comportements de santé seront évalués deux fois dans les mêmes ménages si possible ou dans des ménages alternatifs, au cas où la population de l'étude serait instable en raison de la migration et / ou de taux de natalité / mortalité élevés. Des ménages supplémentaires, supposés être de 20% en moyenne (Tableau 2), peuvent être ajoutés pour tenir compte de la possible perte de suivi entre les deux évaluations. Eventuellement,  $\bar{n}_0$  sera divisé par le nombre de sous-zones et pondéré proportionnellement à la taille de la population en appliquant un échantillonnage stratifié selon le poids (16).

### Echantillonnage

Si une base d'échantillonnage ou une liste de ménages compréhensif et à jour existe (par DSS / HDSS ou recensement disponible), une sélection aléatoire informatisée sera effectuée en utilisant SAS (Système d'analyse statistique, version 9.4, SAS Institute, Cary NC) en appliquant une sélection aléatoire simple en série sans remplacement. S'il n'existe aucune base de sondage, celle-ci peut être construite en utilisant l'imagerie satellitaire ou les cartes aériennes pour dénombrer toutes les structures (26), raster (27) ou cellules de grille (28, 29).

Cependant, nous utilisons une technique géospatiale pour la création de points générés par l'outil de génération de points ArcGIS (Aeronautical Reconnaissance Coverage Geographic Information System, Redlands, CA, USA, version 10.2) avec l'application d'un échantillonnage simple stratifié selon le poids

(30, 31). L'outil place de façon aléatoire des nombres de points spécifiés dans les entités d'un polygone correspondant à une sous-zone administrative. Les coordonnées X et Y définissent un point jusqu'à ce que la taille d'échantillon soit atteinte. Les points aléatoires géographiques générés par ArcGIS sont convertis en un fichier image au format KML (Keyhole Markup Language) ou KMZ (Keyhole Markup language Zipped) et importés dans Google Earth Pro® (Google Inc., Mountain View, CA, États-Unis, version 6.2.2.6613). Un identifiant numérique unique et des coordonnées géographiques horizontales sont affectés à chaque point. L'emplacement de chaque point est vérifié sur une imagerie satellite Google Earth Pro® mise à jour. L'annexe 4 illustre notre approche en utilisant des exemples du Ghana et de Madagascar.

Les points géographiques étiquetés avec des identifiants sont représentés sur des impressions de taille d'affiche (60 x 60 à 60 x 90 cm) d'images satellite Google Earth Pro avec une haute résolution jusqu'au niveau de la structure. Ces cartes satellites aideront à localiser précisément les points sélectionnés sur le terrain. Des récepteurs GPS (Global Positioning System) portables (Garmin-eTrex, Garmin Ltd., Lenexa, KS, USA) aide à vérifier les emplacements. Les récepteurs seront positionnés près d'un point localisé, dans une position statique et en plein air pour assurer une lecture sans obstacle. En cas de refus, d'absence du répondant ou de localisation d'un point non résidentiel, un point résidentiel le plus proche de la droite ou de la gauche sera visité (32).

### **Fréquence de la collecte de données**

Les points résidentiels seront visités deux fois pour des entrevues au cours du programme SETA pour prendre en compte un possible impact lié à la saison, sur le comportement sanitaire (33-37). Les enquêtes auront lieu à différentes saisons - une à la fin de la saison sèche ou au moins un mois après son début et une vers la fin de la saison des pluies ou au moins un mois après son début (Tableau 3). Actuellement, l'étude HPAfrica est en cours au Burkina Faso, au Ghana et à Madagascar et devrait se poursuivre dans les autres pays au cours des prochains mois.

### **Critères d'inclusion et d'exclusion**

Les membres du ménage de tout âge et des deux sexes qui vivent dans la zone d'étude au jour de l'interview seront éligibles pour l'inclusion. Un ménage sera exclu si le répondant désigne refuse de participer ou n'est pas disponible après trois visites consécutives. Tous les visiteurs et individus dont le lieu de résidence n'est pas connu ou est en-dehors de la zone d'étude seront exclus.

Pour raison de cette enquête, un ménage est défini comme une personne ou un groupe de personnes apparentées ou non apparentées vivant dans la même unité d'habitation, reconnaissant un individu adulte comme chef du ménage, partageant les mêmes installations domestiques, et subvenant indépendamment à leurs besoins en termes de nourriture et des autres éléments essentiels pour vivre (26).

L'interview aura lieu exclusivement avec le répondant, qui est un membre adulte du ménage à l'âge de majorité légale spécifique au pays. Cette personne peut être identifiée comme décideur par les membres du même ménage et sert de substitut pour un ménage entier (15). D'autres définitions pertinentes sont expliquées subséquentement.

### **Collecte de données**

Les intervieweurs de site recevront une formation sur la localisation des points géographiques, l'identification des répondants, les procédures de consentement éclairé en mettant l'accent sur la participation volontaire, et sur le déploiement de formulaires d'étude standardisés et pré-testés avant le lancement de HPAfrica. Les formulaires de consentement éclairé et d'étude seront traduits dans la langue officielle du pays et retraduits en anglais pour prendre en compte des erreurs de traduction et apporter des corrections, le cas échéant.

### **Gestion de données**

1  
2  
3 La gestion des données dépendra du mode de collecte, qui sera principalement électronique plutôt que  
4 sur support papier. Les expériences passées ont montré les inconvénients suivants de la collecte de  
5 données sur papier: une forte probabilité d'erreurs lors du remplissage des formulaires d'étude, et le  
6 besoin de numérisation des données, qui est une étape supplémentaire, laborieuse, qui consomme du  
7 temps et sujette aux erreurs. La capture électronique de données à l'aide d'une application pour  
8 smartphone ou tablette réduit ces facteurs limitants à la qualité des données.  
9

10 Il peut y avoir une période pilote au cours de laquelle des données sur support papier et sans papier  
11 seront collectées avant la mise en œuvre complète de la collecte de données électroniques. Ce dernier  
12 utilise l'application Android "HPA Collect" (Google Android 5.0.1 9API 23, disponible à l'adresse  
13 <https://play.google.com/store/apps/details?id=anint.ivi.hpa>) et la plate-forme "HPA Web" (CSS,  
14 JavaScript et JSP, disponible sur <http://hpa.ivi.int/>), qui sont tous deux accompagnés d'un dictionnaire de  
15 variables contenant les codes, la signification et les propriétés des variables au moins en anglais et en  
16 français. Une connectivité internet sans fil stable utilisant des navigateurs par défaut est nécessaire pour  
17 assurer une synchronisation simultanée, attribuable, originale et précise des données entre "HPA Collect"  
18 et "HPA Web". L'accès à "HPA Collect" et "HPA Web" est protégé par un mot de passe. L'annexe 5 affiche  
19 le diagramme du système, qui a les caractéristiques suivantes:  
20

### 21 **Structure ou fonctionnalités de "HPA Collect"**

- 22 • **Gestion des utilisateurs:** Une interface utilisateur simple fournit différents privilèges aux  
23 utilisateurs pour entrer, modifier (sauf pour les étiquettes d'étude) et exporter ou transférer  
24 des données. Il établit une piste d'audit qui enregistre lorsque les utilisateurs entrent des  
25 données dans le serveur.
- 26 • **Saisie de données:** Les données sont entrées directement dans le smartphone ou la  
27 tablette. Les champs de saisie limitent les réponses possibles à des réponses plausibles  
28 uniquement en offrant différentes méthodes de saisie:
  - 29 ▪ Modifier le texte: texte libre
  - 30 ▪ Groupe radio / bouton Multi-clic: choix unique (radio group/Multi click button)
  - 31 ▪ Case à cocher: choix multiple
  - 32 ▪ Sélecteur de date et d'heure: date et heure d'entrée
  - 33 ▪ Spinner: bouton déroulant

34 Des fonctionnalités supplémentaires permettent à l'enquêteur de gagner du temps en  
35 transférant les données collectées plus tôt aux champs de données requis à un stade  
36 ultérieur de l'interview en effectuant des vérifications de vraisemblance pour divers champs  
37 de saisie de données et en reconnaissant facilement les modèles de saut. Les vérifications  
38 d'erreurs, les notifications de données manquantes, les erreurs de code et les erreurs  
39 logiques sont également incluses.

- 40 • **Vue des données:** Les données brutes entrées à l'origine peuvent être vues dans le même  
41 format lisible par l'homme et la machine, à savoir le format JSON, étant donné qu'elles seront  
42 transférées vers un serveur de base de données (Windows, MySQL). Des fonctions  
43 supplémentaires telles que «effacer» pour effacer tous les enregistrements, «réinitialiser»  
44 pour revenir à la page d'entrée de données principale, et «rechercher» pour rechercher une  
45 étiquette d'étude sont disponibles.
- 46 • **Paramètres:** la possibilité de changer la langue du système entre l'anglais et le français est  
47 fournie.
- 48 • **À propos de:** La version actuellement installée de «HPA Collect» est affichée.  
49

### 50 **Structure ou caractéristiques de "HPA Web"**

- 51 • **Accueil:** une introduction à la plateforme est donnée et un tutoriel en français et en anglais  
52 sera accessible.
- 53 • **Aperçu du Formulaire:** Les formulaires d'étude sont affichés séparément montrant chaque  
54 question et les données d'entrée correspondantes en tant que variables définies.  
55  
56  
57  
58  
59

- **Modifier le formulaire:** cette fonction permet la correction des données téléchargées. Il est uniquement accessible aux gestionnaires de données de chaque pays participant et à IVI.
- **Cherche:** Les étiquettes d'étude spécifiques données à chaque formulaire d'étude peuvent être filtrées.
- **Dictionnaire des variables:** Le dictionnaire variable peut être téléchargé.
- **Exporter:** Les données peuvent être converties à partir du serveur dans un fichier Excel transférable.
- **Contactez-nous:** Une correspondance rapide et facile entre les utilisateurs et le gestionnaire de données à IVI est donnée.

Les données seront examinées quotidiennement par le personnel clé de l'étude et vérifiées en termes de consistance et d'exactitude avant l'analyse des données. La qualité des données peut être vérifiée en sélectionnant un sous-ensemble de 5% pour la validation par rapport aux données originales sur support papier, si possible. Les noms des membres du ménage ne seront pas liés aux formulaires d'étude de HPAfrica et ne seront pas enregistrés dans la base de données afin d'assurer la confidentialité. L'accès à la base de données sera limité au personnel d'étude autorisé uniquement et les données seront conservées dans un endroit sécurisé et protégé. Des fichiers de sauvegarde provisoires périodiques et au moins trois fichiers de sauvegarde définitifs de la base de données stockés dans un endroit sécurisé et verrouillé éviteront la perte de données et garantiront la sécurité des données. Toutes les données seront conservées pendant au moins cinq ans.

### L'analyse des données

Des analyses descriptives telles que les fréquences absolues et relatives, les médianes ou les moyennes arithmétiques seront effectuées pour construire une description contemporaine de la population de base.

Les analyses de base comprendront le calcul des proportions stratifiées selon l'âge et le sexe, des comportements sanitaires *génériques* et *réels*, y compris l'utilisation des soins de santé, pour divers signes et symptômes ou combinaisons de signes et de symptômes. Ces analyses permettront une classification graduelle basée sur la sévérité de la maladie, incluant un intervalle de confiance de 95%. Le comportement de santé sera ajusté pour un effet de regroupement naturel présumé parmi les membres du ménage. Des données stratifiées les plus à jour sur la population par site et les données démographiques dérivées de HPAfrica seront utilisées pour générer les proportions pour l'ajustement des calculs d'incidence.

Les informations socio-économiques collectées seront utilisées pour construire des indices de richesse des populations étudiées en appliquant des analyses factorielles basées sur la méthode des composantes principales (38). De plus, des analyses de régression bi et multivariée seront effectuées pour identifier les facteurs de confusion potentiels ou la modification des effets en utilisant les scores factoriels.

Les analyses de régression bi et multivariée seront effectuées en utilisant les scores factoriels pour l'évaluation des variables suivantes:

- Données socioéconomiques telles que l'éducation, le revenu, l'assurance maladie, le logement et les biens des ménages
- Hygiène et assainissement tels que l'accès aux toilettes, les sources d'eau, la manipulation des aliments, l'élimination des déchets et les contacts avec les animaux
- Comportement sanitaire: *réel* (stratifié selon l'âge et le sexe, gravité, fréquence), *générique* (stratifié selon l'âge et le sexe, gravité, classement par choix)
- Modalités de déplacement vers les établissements de santé, stratifiées selon l'âge
- Saisonnalité liée à l'hygiène et à l'assainissement, comportement sanitaire, modalités de déplacement
- Facteurs culturels / religieux / ethnographiques, stratifiés selon l'âge
- Statut de vaccination parmi les enfants  $\leq 6$  ans (18, 19)
- Connaissance et perception des maladies courantes

### Considérations éthiques

Il n'y a pas d'avantages directs pour les ménages inscrits et leurs membres. Les avantages indirects pour la population générale sur les sites seront les informations mises à jour sur le fardeau des maladies transmissibles, y compris les facteurs influençant la transmission de la maladie et l'infection. L'étude HPAfrica génère des évidences pour aider les décideurs à introduire des mesures appropriées pour la prévention et le contrôle des maladies.

Ce protocole a fait l'objet d'examens par le Comité de Révision Institutionnelle d'IVI et des comités locaux spécifiques aux sites, comme indiqué dans la section «Références éthiques». Pendant et après l'étude HPAfrica, toutes les données des sujets inscrits seront gardés avec une stricte confidentialité et ne seront pas divulguées à une tierce partie par aucun membre de l'équipe de recherche. La protection par mot de passe des appareils et de la base de données est utilisée pour une stricte confidentialité. Toutes les données sur support papier (formulaires de consentement) seront conservées dans un endroit sécurisé et verrouillé. Les informations confidentielles stockées sur des ordinateurs et des sources de données sur support papier seront seulement mises à la disposition des co-chercheurs et du personnel d'IVI directement impliqués dans les activités d'étude de HPAfrica.

### Abbréviations

JSON: JavaScript Objective Notation; CSS: Cascading Style Sheets; JSP: Java Server Page; SQL: Structured Query Language

## Définitions/Terminologie

| <b>A</b>                                         |                                                                                                                                                                                                                                                                                                                                                                                                                                                                                                                                                                                                                                                                                                |
|--------------------------------------------------|------------------------------------------------------------------------------------------------------------------------------------------------------------------------------------------------------------------------------------------------------------------------------------------------------------------------------------------------------------------------------------------------------------------------------------------------------------------------------------------------------------------------------------------------------------------------------------------------------------------------------------------------------------------------------------------------|
| Automédication                                   | Fait de se médicamenter soi-même ou de traiter sa propre maladie ou son état sans supervision médicale ou ordonnance.                                                                                                                                                                                                                                                                                                                                                                                                                                                                                                                                                                          |
| <b>B</b>                                         |                                                                                                                                                                                                                                                                                                                                                                                                                                                                                                                                                                                                                                                                                                |
| <b>C</b>                                         |                                                                                                                                                                                                                                                                                                                                                                                                                                                                                                                                                                                                                                                                                                |
| Choléra                                          | Maladie infectieuse de l'intestin grêle qui peut être mortelle causée par la bactérie <i>Vibrio cholerae</i> ; elle se propage par voie fécale-orale par l'ingestion d'eau et d'aliments contaminés et provoque fièvre, diarrhée aqueuse sévère, vomissements et déshydratation.                                                                                                                                                                                                                                                                                                                                                                                                               |
| Confusion/Vertiges/Perte de connaissance         | L'état de désorientation ou d'absence de clarté d'esprit ; l'état anormal de réponse aux stimuli dans l'environnement; faible, wooziness, faiblesse, instabilité ou tendance à tomber; l'interruption de la conscience de soi et de son environnement.                                                                                                                                                                                                                                                                                                                                                                                                                                         |
| Convulsion                                       | Mouvement soudain, violent et irrégulier d'un membre/d'une partie du corps ou de tout le corps causé par une contraction involontaire des muscles.                                                                                                                                                                                                                                                                                                                                                                                                                                                                                                                                             |
| Coqueluche (Pertussis)                           | La coqueluche est une maladie bactérienne très contagieuse. Les symptômes d'un froid commun comme nez qui coule, fièvre et toux sont suivis par des semaines de toux sévère et un son aigu de la coqueluche ou haletant quand une personne malade inspire; toux sévère peut être suivie de vomissements, rupture des côtes ou fatigue extrême. Les très jeunes et les personnes âgées infectées peuvent avoir peu ou pas de toux, ou peuvent avoir des périodes de respiration interrompue pendant lesquelles elles ne respirent pas. La coqueluche est transmise par la bactérie <i>Bordetella pertussis</i> par toux et éternuements d'une personne infectée.                                |
| <b>D</b>                                         |                                                                                                                                                                                                                                                                                                                                                                                                                                                                                                                                                                                                                                                                                                |
| Déshydratation                                   | Une condition de perte excessive d'eau/d'hydratation par le corps.                                                                                                                                                                                                                                                                                                                                                                                                                                                                                                                                                                                                                             |
| Diarrhée                                         | Une condition d'évacuer les matières fécales du corps très fréquemment et sous forme plutôt liquide que solide.                                                                                                                                                                                                                                                                                                                                                                                                                                                                                                                                                                                |
| Difficultés respiratoires/<br>Respiration sévère | Une condition de la respiration anormale accompagnée d'une respiration sifflante, d'une douleur thoracique, d'un tirage thoracique, d'un stridor, d'un gonflement de la poitrine ou d'une toux par exemple.                                                                                                                                                                                                                                                                                                                                                                                                                                                                                    |
| Diphthérie                                       | Maladie hautement contagieuse, parfois mortelle, causée par la bactérie <i>Corynebacterium diphtheriae</i> . Elle se transmet de personne à personne, par l'air ou les objets contaminés et affecte les voies respiratoires supérieures. Les symptômes courants sont maux de gorge, gonflement des glandes/ ganglions lymphatiques, malaise, fièvre/frissons, substance membraneuse/matière grise et épaisse qui se forme dans la gorge/sur les amygdales et gêne/accélère la respiration (toux rauque) et gêne pour avaler. Une forme de diphtérie qui implique la peau, les yeux et les organes génitaux est également signalée et se caractérise par une peau douloureuse, rouge et enflée. |
| Douleur abdominale/<br>Douleur intestinale       | Douleur (aiguë/courte durée ou chronique/longue durée) qui survient entre la poitrine et l'aîne (souvent désignée comme la région de l'estomac/du ventre)                                                                                                                                                                                                                                                                                                                                                                                                                                                                                                                                      |
| Douleur intestinale/Douleur abdominale           | Douleur (aiguë/courte durée ou chronique/longue durée) qui survient entre la poitrine et l'aîne (souvent désignée comme la région de l'estomac/du ventre)                                                                                                                                                                                                                                                                                                                                                                                                                                                                                                                                      |
| Douleur/Maux                                     | État caractérisé par une douleur sourde continue/prolongée dans une partie du corps ; la sensation/souffrance/inconfort physique causée par                                                                                                                                                                                                                                                                                                                                                                                                                                                                                                                                                    |

|                                      |                                                                                                                                                                                                                                                                                                                                                                                                                                                                          |
|--------------------------------------|--------------------------------------------------------------------------------------------------------------------------------------------------------------------------------------------------------------------------------------------------------------------------------------------------------------------------------------------------------------------------------------------------------------------------------------------------------------------------|
|                                      | une maladie/une blessure/quelque chose qui fait mal au corps.                                                                                                                                                                                                                                                                                                                                                                                                            |
| <b>E</b>                             |                                                                                                                                                                                                                                                                                                                                                                                                                                                                          |
| Éducation formelle                   | Modèle d'éducation systématique et organisée structuré et administré selon un ensemble de lois et de normes ; les institutions d'éducation formelle sont organisées de façon administrative, physique et pédagogique et exigent des étudiants une assiduité minimum ; il implique des évaluations intermédiaires et finales afin d'accéder au niveau d'apprentissage suivant ; il délivre des certificats et des diplômes conformément à un ensemble de règles strictes. |
| Essoufflement/<br>Respiration rapide | Fait de respirer anormalement rapidement et profondément ; à une fréquence de >20 respirations par minute pour les adultes, >30 respirations par minute pour les enfants et >45 respirations par minute par les bébés.                                                                                                                                                                                                                                                   |
| Établissement de santé               | Lieux ou institutions où des soins de santé sont prodigués ; dont les hôpitaux, les cliniques, les centres de santé, les postes de santé et les centres de soins spécialisé.                                                                                                                                                                                                                                                                                             |
| Éternuement                          | Fait d'expulser soudainement l'air par le nez et la bouche avec un bruit important caractéristique.                                                                                                                                                                                                                                                                                                                                                                      |
| <b>F</b>                             |                                                                                                                                                                                                                                                                                                                                                                                                                                                                          |
| Faiblesse/Malaise/Fatigue            | État de se sentir fatigué/épuisé/à bout de forces ; sentiment général d'inconfort/malaise/de ne pas être en bonne santé ou heureux.                                                                                                                                                                                                                                                                                                                                      |
| Fatigue/Malaise/<br>Faiblesse        | État de se sentir fatigué/épuisé/à bout de forces ; sentiment général d'inconfort/malaise/de ne pas être en bonne santé ou heureux.                                                                                                                                                                                                                                                                                                                                      |
| Fièvre                               | Température corporelle anormalement élevée (habituellement au-dessus de 38°C).                                                                                                                                                                                                                                                                                                                                                                                           |
| Fièvre <3 jours                      | Température corporelle anormalement élevée (habituellement au-dessus de 38°C) qui dure moins de 3 jours et apparaît en continu.                                                                                                                                                                                                                                                                                                                                          |
| Fièvre >3 jours                      | Température corporelle anormalement élevée (habituellement au-dessus de 38°C) qui dure plus de 3 jours et apparaît en continu.                                                                                                                                                                                                                                                                                                                                           |
| Fièvre jaune                         | Maladie infectieuse aiguë, pathogène pour l'homme et virale caractérisée par l'apparition soudaine de symptômes comme fièvre, frissons, perte d'appétit, nausée, douleurs musculaires et maux de tête qui disparaissent généralement en quelques jours ou sont suivis de symptômes plus graves comme jaunisse, fièvre forte et hémorragie. La maladie est causée par un virus du genre Flavivirus et est transmise par la piqûre d'un moustique infecté.                 |
| Fièvre typhoïde                      | Maladie infectieuse bactérienne potentiellement mortelle causée par <i>Salmonella typhi</i> ; elle se transmet par la voie fécale-orale par les aliments et l'eau contaminés ou de personne à personne. Les symptômes courants sont forte fièvre, maux de tête, douleur abdominale, constipation/diarrhée et éruption cutanée. Des complications graves (perforation de l'intestin) sont rapportées.                                                                     |
| Frissons                             | Sensation de froid qui peut être accompagnée de frissons/tremblements du corps et de pâleur de la peau                                                                                                                                                                                                                                                                                                                                                                   |
| <b>G</b>                             |                                                                                                                                                                                                                                                                                                                                                                                                                                                                          |
| Gonflement/Œdème                     | État d'accumulation excessive de liquide aqueux/gonflement des cavités ou des tissus du corps ; couramment constaté dans les mains/bras/pieds/jambes ; augmentation du volume de tissu.                                                                                                                                                                                                                                                                                  |
| Grippe                               | Maladie infectieuse hautement contagieuse des voies respiratoires causée par le virus de la grippe ; elle se propage de personne à personne par les particules expulsées par la toux/les éternuements/la parole et les objets contaminés. Les symptômes courants sont fièvre,                                                                                                                                                                                            |



|                                             |                                                                                                                                                                                                                                                                                                                                                                                                                                                                                                                                   |
|---------------------------------------------|-----------------------------------------------------------------------------------------------------------------------------------------------------------------------------------------------------------------------------------------------------------------------------------------------------------------------------------------------------------------------------------------------------------------------------------------------------------------------------------------------------------------------------------|
|                                             | douleurs dans les muscles/bras/jambes, frissons/sueur, maux de tête, fatigue/faiblesse, nez qui coule/congestion nasale, éternuements, maux de gorge et toux sèche et persistante.                                                                                                                                                                                                                                                                                                                                                |
| Guérisseur traditionnel                     | Personne qui cherche à maintenir la santé aussi bien qu'à prévenir, diagnostiquer et améliorer ou traiter les maladies en utilisant un ensemble de connaissances, compétences et pratiques basées sur des théories, des croyances et des expériences.                                                                                                                                                                                                                                                                             |
| <b>H</b>                                    |                                                                                                                                                                                                                                                                                                                                                                                                                                                                                                                                   |
| <i>Haemophilus influenzae</i> de type B     | Bactérie qui provoque une série de maladies et se propage par les particules expulsées par la toux ou les éternuements, et surviennent surtout chez l'enfant de moins de 5 ans ; les symptômes courants sont fièvre, maux de tête et raideur dans le cou jusqu'à l'état septique. Elle peut causer otites, cellulites (infection des tissus mous), arthrite, infections des voies respiratoires supérieures, pneumonies, méningites (avec dommages potentiels au cerveau) et épiglottites (avec obstruction des voies aériennes). |
| Hémorragie (interne/externe)/ Perte de sang | État caractérisé par une perte de sang du système vasculaire, soit de façon interne à l'intérieur du corps (hémorragie interne) soit de façon externe par un orifice naturel ou une lésion de la peau (hémorragie externe) ; sang qui s'échappe d'un vaisseau sanguin endommagé.                                                                                                                                                                                                                                                  |
| Hépatite B                                  | Maladie infectieuse causée par le virus de l'hépatite B (VHB) qui affecte le foie (infection hépatique aiguë/chronique ; peut entraîner une insuffisance hépatique/un cancer/une cirrhose). Le virus se transmet de personne à personne par le sang/le sperme/les autres fluides corporels. Les symptômes courants sont fièvre, malaise/faiblesse/fatigue, perte d'appétit, nausée/vomissements, gêne/douleur abdominale, urines foncées, douleurs articulaires et jaunisse.                                                      |
| Hépatite E                                  | Maladie infectieuse causée par le virus de l'hépatite E (VHE) qui affecte le foie (infection hépatique aiguë uniquement ; peut entraîner une insuffisance hépatique aiguë). Le virus se propage par les voies fécales-orales par l'ingestion d'eau ou d'aliments contaminés, les animaux contaminés (de façon zoonotique) et par le sang. Les symptômes courants sont fièvre, malaise, perte d'appétit, diarrhée, nausée, gêne abdominale, urines foncées, douleurs articulaires et jaunisse.                                     |
| <b>I</b>                                    |                                                                                                                                                                                                                                                                                                                                                                                                                                                                                                                                   |
| <b>J</b>                                    |                                                                                                                                                                                                                                                                                                                                                                                                                                                                                                                                   |
| Jaunisse                                    | Maladie qui fait jaunir la peau/le blanc des yeux.                                                                                                                                                                                                                                                                                                                                                                                                                                                                                |
| <b>K/L</b>                                  |                                                                                                                                                                                                                                                                                                                                                                                                                                                                                                                                   |
| <b>M</b>                                    |                                                                                                                                                                                                                                                                                                                                                                                                                                                                                                                                   |
| Malaise/Fatigue/Faiblesse                   | État de se sentir fatigué/épuisé/à bout de forces ; sentiment général d'inconfort/malaise/de ne pas être en bonne santé ou heureux.                                                                                                                                                                                                                                                                                                                                                                                               |
| Maux de tête                                | Douleur continue dans une région de la tête.                                                                                                                                                                                                                                                                                                                                                                                                                                                                                      |
| Maux/Douleur                                | État caractérisé par une douleur sourde continue/prolongée dans une partie du corps ; la sensation/souffrance/inconfort physique causée par une maladie/une blessure/quelque chose qui fait mal au corps.                                                                                                                                                                                                                                                                                                                         |
| Médecin                                     | Une personne compétente/formée aux soins ; une personne éduquée, cliniquement expérimentée et autorisée à pratiquer la médecine.                                                                                                                                                                                                                                                                                                                                                                                                  |
| Ménage                                      | Personne ou groupe de personnes apparentées ou non qui vivent ensemble dans la même unité d'habitation, qui reconnaissent un adulte de sexe masculin ou féminin comme le chef du ménage, qui partagent                                                                                                                                                                                                                                                                                                                            |

|                                              |                                                                                                                                                                                                                                                                                                                                                                                                                                                                                                                                                                                               |
|----------------------------------------------|-----------------------------------------------------------------------------------------------------------------------------------------------------------------------------------------------------------------------------------------------------------------------------------------------------------------------------------------------------------------------------------------------------------------------------------------------------------------------------------------------------------------------------------------------------------------------------------------------|
|                                              | les mêmes installations domestiques, qu'on considère comme formant une unité, et qui subviennent à leurs besoins en termes de nourriture et des autres éléments essentiels pour vivre. Un ménage peut être situé dans une unité d'habitation unique (bâtiment à un seul étage) ou dans un ensemble de logements collectifs (bâtiment à plusieurs étages).                                                                                                                                                                                                                                     |
| Méningite                                    | Inflammation virale/bactérienne/fongique infectieuse parfois mortelle des membranes (méninges) qui entourent le cerveau et la moelle épinière ; elle se propage de personne à personne par les particules expulsées par la toux/les éternuements/la parole et les objets contaminés. Les symptômes courants sont forte fièvre, maux de tête sévères, nausée/vomissements, confusion, convulsions ; perte d'appétit et de la soif, fatigue, sensibilité à la lumière, éruption cutanée et raideur au cou.                                                                                      |
| <b>N</b>                                     |                                                                                                                                                                                                                                                                                                                                                                                                                                                                                                                                                                                               |
| Nausée/Vomissements                          | Sensation de malaise dans l'estomac avec tendance à vomir ; fait d'éjecter une partie/tout le contenu de l'estomac principalement par la bouche.                                                                                                                                                                                                                                                                                                                                                                                                                                              |
| Nez qui coule                                | État résultant de la production par le nez (tissus nasaux et adjacents et vaisseaux sanguins) de mucus/drainage excessif, qui coule du nez pour retirer quelque chose.                                                                                                                                                                                                                                                                                                                                                                                                                        |
| <b>O</b>                                     |                                                                                                                                                                                                                                                                                                                                                                                                                                                                                                                                                                                               |
| Œdème/Gonflement                             | État d'accumulation excessive de liquide aqueux/gonflement des cavités ou des tissus du corps ; couramment constaté dans les mains/bras/pieds/jambes ; augmentation du volume de tissu.                                                                                                                                                                                                                                                                                                                                                                                                       |
| Oreillons                                    | Maladie infectieuse virale causée par le virus des oreillons qui affecte principalement les glandes parotides qui sont situées sous et devant les oreilles ; elle se propage de personne à personne par la salive infectée/les particules de salive infectées expulsées par la toux/les éternuements/la parole et les objets contaminés. Les symptômes courants sont fièvre, gonflement d'une/des deux glandes parotides, maux de tête ; douleurs musculaires, faiblesse/fatigue, perte d'appétit et douleurs en mâchant/avalant ; une complication connue est une possible perte d'audition. |
| <b>P</b>                                     |                                                                                                                                                                                                                                                                                                                                                                                                                                                                                                                                                                                               |
| Paludisme                                    | Maladie infectieuse parfois mortelle causée par un parasite ( <i>Plasmodium</i> spp.) transmis principalement par la piqûre de moustiques infectés, en dehors de la transmission mère-enfant et par le sang. Les symptômes courants sont attaques récurrentes de frissons, sueurs, forte fièvre, maux de tête, vomissements et diarrhée.                                                                                                                                                                                                                                                      |
| Personne interrogée                          | Membre adulte (à l'âge légal de majorité du pays concerné) du ménage qui est un décideur en ce qui concerne les soins de santé/l'utilisation des soins de santé pour le ménage entier à l'intérieur du site d'étude ; cette personne adulte parle ainsi au nom de tous les membres du ménage. Cette personne peut être identifiée par les autres membres du même ménage comme la personne qui est principalement impliquée dans les soins quotidiens des membres du ménage.                                                                                                                   |
| Perte de connaissance/<br>Vertiges/Confusion | L'état de désorientation ou d'absence de clarté d'esprit ; l'état anormal de réponse aux stimuli dans l'environnement; faible, wooziness, faiblesse, instabilité ou tendance à tomber; l'interruption de la conscience de soi et de son environnement.                                                                                                                                                                                                                                                                                                                                        |
| Perte de poids                               | Baisse (volontaire/involontaire) du poids du corps.                                                                                                                                                                                                                                                                                                                                                                                                                                                                                                                                           |
| Perte de sang/                               | État caractérisé par une perte de sang du système vasculaire, soit de                                                                                                                                                                                                                                                                                                                                                                                                                                                                                                                         |

|                                                  |                                                                                                                                                                                                                                                                                                                                                                                                                                                                                                                                                                                  |
|--------------------------------------------------|----------------------------------------------------------------------------------------------------------------------------------------------------------------------------------------------------------------------------------------------------------------------------------------------------------------------------------------------------------------------------------------------------------------------------------------------------------------------------------------------------------------------------------------------------------------------------------|
| Hémorragie                                       | façon interne à l'intérieur du corps (hémorragie interne) soit de façon externe par un orifice naturel ou une lésion de la peau (hémorragie externe) ; sang qui s'échappe d'un vaisseau sanguin endommagé.                                                                                                                                                                                                                                                                                                                                                                       |
| Pharmacie                                        | Endroit où seuls des médicaments (ordonnance requise/non requise) sont préparés, conservés, composés et dispensés.                                                                                                                                                                                                                                                                                                                                                                                                                                                               |
| Pneumocoque                                      | Une inflammation infectieuse bactérienne des poumons parfois mortelle qui affecte souvent les personnes immunodéprimées et est causée par la bactérie <i>Streptococcus pneumoniae</i> ; elle se propage de personne à personne par les particules expulsées par la toux/les éternuements/la parole et les objets contaminés. Les symptômes courants sont fièvre, frissons, toux (avec mucosités/pus), douleurs thoraciques, difficulté à respirer/essoufflement, fatigue, nausée/vomissements et diarrhée ; des symptômes rares sont septicémie, épanchement pleural et empyème. |
| Polio                                            | Maladie virale infectieuse, très contagieuse, parfois mortelle, causée par le poliovirus qui cause dans sa forme la plus sévère paralysie et difficultés à respirer ; il se transmet par la voie fécale-orale par ingestion d'eau et d'aliments contaminés et de personne à personne. Les symptômes courants sont fièvre, maux de gorge, maux de tête, vomissements, fatigue, maux de dos, de cou/raideur au cou, faiblesse des muscles/muscles douloureux, méningite, perte de réflexes, membres lourds/pendants.                                                               |
| Occupation                                       | A job, or means of earning a wage/living; often requires the mastery of a complex set of knowledge, tasks, duties and skills acquired through formal education and/or practical experience.                                                                                                                                                                                                                                                                                                                                                                                      |
| <b>Q</b>                                         |                                                                                                                                                                                                                                                                                                                                                                                                                                                                                                                                                                                  |
| <b>R</b>                                         |                                                                                                                                                                                                                                                                                                                                                                                                                                                                                                                                                                                  |
| Respiration rapide/<br>Essoufflement             | Fait de respirer anormalement rapidement et profondément ; à une fréquence de >20 respirations par minute pour les adultes, >30 respirations par minute pour les enfants et >45 respirations par minute par les bébés.                                                                                                                                                                                                                                                                                                                                                           |
| Respiration sévère/<br>Difficultés respiratoires | Une condition de la respiration anormale accompagnée d'une respiration sifflante, d'une douleur thoracique, d'un tirage thoracique, d'un stridor, d'un gonflement de la poitrine ou d'une toux par exemple.                                                                                                                                                                                                                                                                                                                                                                      |
| Revenus/Salaire                                  | Argent ou autre forme de paiement que quelqu'un reçoit périodiquement/régulièrement en échange de biens ou de services. Provient généralement d'un emploi/d'une profession.                                                                                                                                                                                                                                                                                                                                                                                                      |
| Rotavirus                                        | Infection virale causée par le rotavirus qui cause principalement des diarrhées pour les enfants de moins de 5 ans ; elle se propage par la voie fécale-orale, de personne à personne et par les objets contaminés. Les symptômes courants sont diarrhée aqueuse, fièvre, vomissements, douleurs abdominales et déshydratation.                                                                                                                                                                                                                                                  |
| Rougeole                                         | Maladie infectieuse parfois mortelle des voies respiratoire (nez/gorge) causée par un virus qui affecte principalement les enfants de moins de 5 ans ; elle se propage de personne à personne par les particules expulsées par la toux/les éternuements/la parole et les objets contaminés. Les symptômes courants sont fièvre, toux sèche, nez qui coule, inflammation des yeux, maux de gorge, larges plaques sur la peau et points blancs dans la bouche et sur les joues.                                                                                                    |
| Rubéole                                          | Maladie infectieuse virale contagieuse connue pour son éruption cutanée rouge distinctive qui est causée par le virus de la rubéole ; elle se transmet de personne à personne (toux/éternuements/parole), de la mère à l'enfant par le sang et les objets contaminés. Les symptômes courants sont fièvre modérée, maux de tête, nez bouché/qui coule,                                                                                                                                                                                                                            |

|                                          |                                                                                                                                                                                                                                                                                                                                                                                                                                                                                                                                                                                                                                                                                                                                                                                                                                                                                                                                                                      |
|------------------------------------------|----------------------------------------------------------------------------------------------------------------------------------------------------------------------------------------------------------------------------------------------------------------------------------------------------------------------------------------------------------------------------------------------------------------------------------------------------------------------------------------------------------------------------------------------------------------------------------------------------------------------------------------------------------------------------------------------------------------------------------------------------------------------------------------------------------------------------------------------------------------------------------------------------------------------------------------------------------------------|
|                                          | yeux rouges/inflammation des yeux, ganglions lymphatiques gonflés et sensibles à la base du crâne/à l'arrière du cou/derrière les oreilles, douleurs articulaires et éruption cutanée rose qui se déplace du visage au torse, aux bras et aux jambes.                                                                                                                                                                                                                                                                                                                                                                                                                                                                                                                                                                                                                                                                                                                |
| <b>S</b>                                 |                                                                                                                                                                                                                                                                                                                                                                                                                                                                                                                                                                                                                                                                                                                                                                                                                                                                                                                                                                      |
| Soins de santé - généraux                | Soins de santé pour les maladies qui n'ont aucun lien avec l'apparition de maladies associées aux signes et symptômes ou les dates de début de maladies.                                                                                                                                                                                                                                                                                                                                                                                                                                                                                                                                                                                                                                                                                                                                                                                                             |
| Soins de santé - réels                   | Soins de santé liés l'apparition de maladies associées aux signes et symptômes ou les dates de début de maladies.                                                                                                                                                                                                                                                                                                                                                                                                                                                                                                                                                                                                                                                                                                                                                                                                                                                    |
| <b>T</b>                                 |                                                                                                                                                                                                                                                                                                                                                                                                                                                                                                                                                                                                                                                                                                                                                                                                                                                                                                                                                                      |
| Témoin                                   | Personne adulte (à l'âge légal de majorité du pays concerné), qui est indépendante de l'étude, qui ne peut pas être indûment influencée par le personnel de l'étude, qui participe au processus de consentement éclairé si le sujet/le représentant légal du sujet est analphabète, et qui lit (lettré) le formulaire de consentement éclairé et toute autre information écrite présentée au sujet.                                                                                                                                                                                                                                                                                                                                                                                                                                                                                                                                                                  |
| Tétanos                                  | Une maladie infectieuse caractérisée par des spasmes musculaires qui commencent généralement dans la mâchoire et progresse vers le reste du corps. Les spasmes durent généralement quelques minutes et se produisent fréquemment pendant les 3-4 semaines au début de la maladie, ils peuvent être si graves qu'ils peuvent causer des fractures osseuses ou la mort lorsqu'ils affectent les muscles respiratoires. Elle peut être caractérisée par d'autres symptômes comme fièvre, sueurs, maux de tête, difficultés à avaler, pression artérielle élevée et augmentation du rythme cardiaque. La maladie est causée par une infection par la bactérie <i>Clostridium tetani</i> qui se trouve dans sol, saliva, poussière et fumier. La bactérie entre par une lésion cutanée (par exemple, coupure, blessure par ponction) par un objet contaminé. Il produit des toxines qui interfèrent avec les contractions musculaires qui résultent des spasmes typiques. |
| Toux                                     | Fait d'expulser de façon soudaine/rapide et bruyamment l'air des poumons ; souvent de façon involontaire afin de dégager les voies respiratoires des poumons de fluides/mucus/autres matières                                                                                                                                                                                                                                                                                                                                                                                                                                                                                                                                                                                                                                                                                                                                                                        |
| Troubles cardiaques                      | Tout trouble que affecte le cœur ; maladies qui impliquent des vaisseaux sanguins rétrécis/bloqués qui peuvent entraîner une attaque cardiaque/douleur thoracique/accident vasculaire cérébral ; maladie qui affecte le muscle/les valves/le rythme du cœur.                                                                                                                                                                                                                                                                                                                                                                                                                                                                                                                                                                                                                                                                                                         |
| Troubles de la pression artérielle       | Pression artérielle élevée/faible ou pression artérielle qui présente des fluctuations excessives.                                                                                                                                                                                                                                                                                                                                                                                                                                                                                                                                                                                                                                                                                                                                                                                                                                                                   |
| Tuberculose                              | Maladie infectieuse bactérienne ( <i>Mycobacterium tuberculosis</i> ), contagieuse, potentiellement grave qui affecte principalement les poumons en plus des reins et de la colonne vertébrale/du cerveau ; elle se transmet de personne à personne par les particules expulsées par la toux/les éternuements/la parole. Les symptômes courants d'une tuberculose active sont toux (avec/sans sang), douleur thoracique, perte de poids, fatigue, fièvre, sueurs nocturnes, frissons et perte d'appétit.                                                                                                                                                                                                                                                                                                                                                                                                                                                             |
| <b>U</b>                                 |                                                                                                                                                                                                                                                                                                                                                                                                                                                                                                                                                                                                                                                                                                                                                                                                                                                                                                                                                                      |
| <b>V</b>                                 |                                                                                                                                                                                                                                                                                                                                                                                                                                                                                                                                                                                                                                                                                                                                                                                                                                                                                                                                                                      |
| Vertiges/Confusion/Perte de connaissance | L'état de désorientation ou d'absence de clarté d'esprit ; l'état anormal de réponse aux stimuli dans l'environnement; faible, wooziness, faiblesse, instabilité ou tendance à tomber; l'interruption de la                                                                                                                                                                                                                                                                                                                                                                                                                                                                                                                                                                                                                                                                                                                                                          |

|                     |                                                                                                                                                                                                                                                                                                                                                                                                                                                                                                                                                                                                                                                                                                                                                                                                                                             |
|---------------------|---------------------------------------------------------------------------------------------------------------------------------------------------------------------------------------------------------------------------------------------------------------------------------------------------------------------------------------------------------------------------------------------------------------------------------------------------------------------------------------------------------------------------------------------------------------------------------------------------------------------------------------------------------------------------------------------------------------------------------------------------------------------------------------------------------------------------------------------|
|                     | conscience de soi et de son environnement.                                                                                                                                                                                                                                                                                                                                                                                                                                                                                                                                                                                                                                                                                                                                                                                                  |
| VIH/SIDA            | Maladie infectieuse causée par le virus de l'immunodéficience humaine (VIH) qui affecte/endommage le système immunitaire et entraîne le syndrome immunodéficitaire acquis (SIDA), une maladie chronique et potentiellement mortelle ; il se transmet par les liquides corporels infectieux comme le sang/le sperme/les autres fluides corporels. Les symptômes courants d'une infection aiguë/précoce sont fièvre, fatigue, maux de tête, douleurs articulaires, éruption cutanée, maux de gorge, ganglions lymphatiques enflés, diarrhée, perte de poids, candidose orale et zona. La maladie non traitée évolue en SIDA ; les symptômes causés par un système immunitaire gravement endommagé sont sueurs, fièvre récurrente, diarrhée chronique, lésions sur la langue et dans la bouche, fatigue, perte de poids et éruptions cutanées. |
| Visiteur            | Personne (apparentée ou non) qui rend visite à un ménage pour passer du temps avec les membres du ménage ; un visiteur ne vit pas avec les membres du ménage dans la même unité d'habitation, ne partage pas les mêmes installations domestiques, la même nourriture et autres éléments essentiels à la vie que les membres du ménage, et ne constitue pas une unité avec les membres du ménage.                                                                                                                                                                                                                                                                                                                                                                                                                                            |
| Voisin              | Personne (apparentée ou non) vivant dans l'habitation à côté de celle d'un ménage cible ; un voisin ne vit pas avec les membres d'un ménage (à côté) dans la même unité d'habitation, ne partage pas les mêmes installations domestiques, aliments ou autres éléments essentiels à la vie que les membres du ménage (à côté), et ne constitue pas une unité avec les membres du ménage (à côté).                                                                                                                                                                                                                                                                                                                                                                                                                                            |
| Vomissements/Nausée | Sensation de malaise dans l'estomac avec tendance à vomir ; fait d'éjecter une partie/tout le contenu de l'estomac principalement par la bouche.                                                                                                                                                                                                                                                                                                                                                                                                                                                                                                                                                                                                                                                                                            |
| <b>W/X/Y/Z</b>      |                                                                                                                                                                                                                                                                                                                                                                                                                                                                                                                                                                                                                                                                                                                                                                                                                                             |

## Formulaires de l'étude

Site \_\_\_\_ Sous-zone \_\_\_\_ Numéro d'habitation \_\_\_\_ Identifiant de l'enquêteur \_\_\_\_

### FORMULAIRE 1 – COMPTE RENDU DES VISITES AUX MÉNAGES

#### Instructions pour l'enquêteur

- Compléter « Formulaire 1 – COMPTE RENDU DES VISITES AUX MÉNAGES » pour chaque ménage visité.
- Compléter « Foyer/Personne interrogée/Complété » une fois que toutes les parties de l'enquête ont été complétées ; si toutes les données n'ont pas été recueillies lors de la visite initiale et/ou d'une visite ultérieure (max. 3 visites), programmer une nouvelle visite.
- **Tentative 1:** Compléter le statut de la visite au ménage et utilisant les choix proposés ; pour « pas à la maison », « à la maison/ne répond pas » et « à la maison/répond/indisponible », programmer une nouvelle visite ; pour « à la maison/répond/refus » indiquez la raison de refus et visitez un ménage de remplacement au plus proche à droite ou à gauche de ce ménage; pour « inexistant/pas d'habitation », passer ce ménage et visiter un ménage de remplacement au plus proche à droite ou à gauche à la place de ce ménage.
- **Tentative 2:** Compléter le statut de la visite du ménage et utilisant les choix proposés ; pour « pas à la maison », « à la maison/ne répond pas » et « à la maison/répond/indisponible », programmer une nouvelle visite.
- **Tentative 3:** Compléter le statut de la visite au ménage et utilisant les choix proposés ; pour « pas à la maison », « à la maison/ne répond pas » et « à la maison/répond/indisponible », passer ce ménage et visiter un ménage de remplacement au plus proche à droite ou à gauche à la place de ce ménage.
- « Site » et « sous-zone » doivent être un numéro à trois chiffres, « numéro d'habitation » un numéro à quatre chiffres, et « identifiant de l'enquêteur » un numéro à deux chiffres (utiliser les listes préparées individuellement pour chaque site pour obtenir les codes) ; saisir « date » au format JJ/MM/AAAA et « heure » au format HH:MM et entourer MATIN ou APRÈS-MIDI. «Étiquette de l'étude» doit être une combinaison d'un code «site» à trois chiffres, d'un code «sous-zone» à trois chiffres et d'un code «numéro d'habitation» à quatre chiffres; le « identifiant de l'enquêteur » doit être un numéro à trois chiffres.

| Tentative 1                            | Date ____/____/____<br>(JJ/MM/AA) | Heure ____/____<br>MATIN/APRÈS-MIDI | Identifiant de l'enquêteur ____                                                                                                                                                                                                                                                                                                                                                                                                   |
|----------------------------------------|-----------------------------------|-------------------------------------|-----------------------------------------------------------------------------------------------------------------------------------------------------------------------------------------------------------------------------------------------------------------------------------------------------------------------------------------------------------------------------------------------------------------------------------|
| STATUT                                 |                                   | Cocher un                           |                                                                                                                                                                                                                                                                                                                                                                                                                                   |
| 1=Pas à la maison                      |                                   | <input type="radio"/>               | ► Planifier nouvelle visite (date/heure)                                                                                                                                                                                                                                                                                                                                                                                          |
| 2=À la maison/ Non-répondant           |                                   | <input type="radio"/>               | ► Planifier nouvelle visite (date/heure)                                                                                                                                                                                                                                                                                                                                                                                          |
| 3=À la maison/ répondant /Indisponible |                                   | <input type="radio"/>               | ► Planifier nouvelle visite (date/heure)                                                                                                                                                                                                                                                                                                                                                                                          |
| 4= À la maison/ Répondant /Complété    |                                   | <input type="radio"/>               |                                                                                                                                                                                                                                                                                                                                                                                                                                   |
| 5= À la maison/ répondant /Refus       |                                   | <input type="radio"/>               | Notez la/les raison(s) du refus; cochez tout ce que s'applique:<br><input type="radio"/> 1=Pas de temps pour répondre aux questions<br><input type="radio"/> 2=Ne veulent pas participer/répondre aux questions<br><input type="radio"/> 3=Autre _____<br><input type="radio"/> 99=Pas de réponse <input type="radio"/> 98=Ne sait pas<br>► Visitez un ménage de remplacement le plus proche de ce ménage du côté droit ou gauche |
| 6=Inexistant/Pas une habitation        |                                   | <input type="radio"/>               | ► Visitez un ménage de remplacement le plus proche de ce ménage du côté droit ou gauche                                                                                                                                                                                                                                                                                                                                           |

| <b>Tentative 2</b>                | Date ____/____/____<br>(JJ/MM/AA) | Heure ____/____<br>MATIN/APRÈS-MIDI                                                                                                                                                                                                                                                                                                                                                                                               | Identifiant de l'enquêteur ____ |
|-----------------------------------|-----------------------------------|-----------------------------------------------------------------------------------------------------------------------------------------------------------------------------------------------------------------------------------------------------------------------------------------------------------------------------------------------------------------------------------------------------------------------------------|---------------------------------|
| STATUT                            |                                   | Cocher un                                                                                                                                                                                                                                                                                                                                                                                                                         |                                 |
| 1=Pas à la maison                 | <input type="radio"/>             | ➡ Planifier nouvelle visite (date/heure)                                                                                                                                                                                                                                                                                                                                                                                          |                                 |
| 2=À la maison/Ne répond pas       | <input type="radio"/>             | ➡ Planifier nouvelle visite (date/heure)                                                                                                                                                                                                                                                                                                                                                                                          |                                 |
| 3=À la maison/Répond/Indisponible | <input type="radio"/>             | ➡ Planifier nouvelle visite (date/heure)                                                                                                                                                                                                                                                                                                                                                                                          |                                 |
| 4= À la maison/Répond/Complété    | <input type="radio"/>             |                                                                                                                                                                                                                                                                                                                                                                                                                                   |                                 |
| 5= À la maison/ répondant /Refus  | <input type="radio"/>             | Notez la/les raison(s) du refus; cochez tout ce que s'applique:<br><input type="radio"/> 1=Pas de temps pour répondre aux questions<br><input type="radio"/> 2=Ne veulent pas participer/répondre aux questions<br><input type="radio"/> 3=Autre _____<br><input type="radio"/> 99=Pas de réponse <input type="radio"/> 98=Ne sait pas<br>➡ Visitez un ménage de remplacement le plus proche de ce ménage du côté droit ou gauche |                                 |
| 6=Inexistant/Pas une habitation   | <input type="radio"/>             | ➡ Visitez un ménage de remplacement le plus proche de ce ménage du côté droit ou gauche                                                                                                                                                                                                                                                                                                                                           |                                 |
| <b>Tentative 3</b>                | Date ____/____/____<br>(JJ/MM/AA) | Heure ____/____<br>MATIN/APRÈS-MIDI                                                                                                                                                                                                                                                                                                                                                                                               | Identifiant de l'enquêteur ____ |
| STATUT                            |                                   | Cocher un                                                                                                                                                                                                                                                                                                                                                                                                                         |                                 |
| 1=Pas à la maison                 | <input type="radio"/>             | ➡ Visitez un ménage de remplacement le plus proche de ce ménage du côté droit ou gauche                                                                                                                                                                                                                                                                                                                                           |                                 |
| 2=À la maison/Ne répond pas       | <input type="radio"/>             | ➡ Visitez un ménage de remplacement le plus proche de ce ménage du côté droit ou gauche                                                                                                                                                                                                                                                                                                                                           |                                 |
| 3=À la maison/Répond/Indisponible | <input type="radio"/>             | ➡ Visitez un ménage de remplacement le plus proche de ce ménage du côté droit ou gauche                                                                                                                                                                                                                                                                                                                                           |                                 |
| 4= À la maison/Répond/Complété    | <input type="radio"/>             |                                                                                                                                                                                                                                                                                                                                                                                                                                   |                                 |
| 5= À la maison/ répondant /Refus  | <input type="radio"/>             | Notez la/les raison(s) du refus; cochez tout ce que s'applique:<br><input type="radio"/> 1=Pas de temps pour répondre aux questions<br><input type="radio"/> 2=Ne veulent pas participer/répondre aux questions<br><input type="radio"/> 3=Autre _____<br><input type="radio"/> 99=Pas de réponse <input type="radio"/> 98=Ne sait pas<br>➡ Visitez un ménage de remplacement le plus proche de ce ménage du côté droit ou gauche |                                 |
| 6=Inexistant/Pas une habitation   | <input type="radio"/>             | ➡ Visitez un ménage de remplacement le plus proche de ce ménage du côté droit ou gauche                                                                                                                                                                                                                                                                                                                                           |                                 |

Site \_\_\_\_ Sous-zone \_\_\_\_ Numéro d'habitation \_\_\_\_ Identifiant de l'enquêteur \_\_\_\_

## FORMULAIRE 2 – FORMULAIRE DE CONSENTEMENT

Evaluation des soins de santé à [site SETA and –pays]

### Instructions à l'enquêteur

- Lire le "Formulaire 2 – FORMULAIRE DE CONSENTEMENT" pour le répondant/demander au répondant de lire attentivement le "Formulaire 2 – FORMULAIRE DE CONSENTEMENT" s'il préfère.
- Le répondant tel que défini dans cette enquête est un adulte (ayant l'âge de la majorité spécifique au pays) membre du ménage et responsable des décisions journalières concernant la santé des membres du ménage; il ne doit pas par exemple être un voisin ou un visiteur.
- S'assurer que le répondant a pleinement compris l'objectif, les procédures, les risques et les bénéfices de cette étude avant d'obtenir son consentement à participer.
- Le répondant doit signer le "Formulaire 2 – FORMULAIRE DE CONSENTEMENT"; si le répondant est incapable de signer/analphabète, une empreinte digitale servira en lieu et place de la signature, et un adulte lettré indépendant de l'étude qui servira de témoin (un membre du même ménage ou un voisin par exemple) signera le "Formulaire 2 – FORMULAIRE DE CONSENTEMENT".
- Collecter les informations sur tous les membres du ménage indépendamment du fait qu'ils soient présents ou non au moment de l'entretien; Recueillir l'information sur seulement les individus présents au moment de l'entretien résultera en un biais dans les données.
- Remplir le "Formulaire 2 – FORMULAIRE DE CONSENTEMENT" pour chaque ménage consentant enrôlé dans l'étude.
- Expliquer au répondant qu'il est prévu de revisiter chaque ménage durant une période de 2 ans; à chaque visite, l'équipe de recherche obtiendra un nouveau consentement.
- «Site» et «sous-zone» doivent être un numéro à trois chiffres, «numéro d'habitation» un numéro à quatre chiffres, et «identifiant de l'enquêteur» un numéro à deux chiffres (utiliser les listes préparées individuellement pour chaque site pour obtenir les codes); saisir «date» au format JJ/MM/AAAA et «heure» au format HH:MM et entourer MATIN ou APRÈS-MIDI. «Étiquette de l'étude» doit être une combinaison d'un code «site» à trois chiffres, d'un code «sous-zone» à trois chiffres et d'un code «numéro d'habitation» à quatre chiffres; le «identifiant de l'enquêteur» doit être un numéro à trois chiffres.

### Investigateur principal et co-investigateur de l'étude

[Ajouter les noms de l'investigateur principal et des co-investigateurs de l'étude ainsi que leurs affiliations respectives]

### Introduction

L'Institut International des Vaccins (IVI) et [ajouter l'institution d'affiliation des investigateurs locaux] travaillent ensemble pour examiner les problèmes de santé et le comportement de santé dans votre communauté [ajouter le site SETA-pays], y compris le statu socio-économique, le comportement d'hygiène et d'assainissement et le statut vaccinal des enfants. Nous aimerions mieux comprendre où vous, votre famille et vos voisins cherchez des soins de santé en cas de maladies causant la fièvre/corps chaud et autres chate & symptômes. Cette information nous aidera à savoir à quelle fréquence vous souffrez de maladies causant de la fièvre et les autres liées à la fièvre, fournir une meilleure image des facteurs influençant la transmission de la maladie et l'infection, et à trouver des moyens pour les prévenir et traiter dans votre communauté. Vous, en tant que responsable principal pour le comportement de santé/l'utilisation des soins de santé quotidienne pour les membres de ce ménage, êtes invités à participer parce que vous vivez dans la localité où nous effectuons cette étude. Ce formulaire de consentement sera lu par vous ou pour vous et vous aurez le temps pour prendre votre décision d'accepter ou de refuser de participer à l'étude. S'il vous plaît, demandez aux membres de l'étude d'expliquer tout mot ou toute information que vous ne comprenez pas. On vous donnera en conséquence plus d'informations sur cette étude, y compris ses risques potentiels, les avantages et les inconvénients. Après vous avoir entièrement expliqué l'étude et si vous acceptez de participer, on vous demandera de signer ce formulaire de consentement au nom de tous les membres du ménage. Si vous ne pouvez pas signer le formulaire, nous vous demandons de fournir votre empreinte digitale, et une personne adulte indépendante de l'étude (membre de votre ménage/voisin) signera le formulaire en tant que témoin. Nous allons vous remettre une copie signée et datée du formulaire de consentement.

### Objectif

L'objectif de cette étude est d'examiner les problèmes de santé et l'utilisation des soins de santé dans votre communauté [ajouter le site SETA-pays], y compris le statu socio-économique et le comportement d'hygiène et d'assainissement. Notre objectif est de mieux comprendre où vous, votre famille et vos voisins cherchez les soins de santé pour des maladies causant de la fièvre/corps chaud et autres chate & symptômes. Cette



information permettra de mieux estimer le fardeau des maladies communes et d'identifier les moyens pour la mise en place de mesures de prévention et de traitement pour les maladies.

### Procédures

Nous visiterons environ [ajouter le nombre pour site d'étude et pays] ménages au total à [ajouter le site et pays] et poserons les mêmes questions dans chaque ménage. Votre ménage a été choisi pour cette étude simplement par hasard. Si vous acceptez de participer, nous vous poserons, au nom de tous les membres du ménage, quelques questions au sujet de votre ménage tels que les initiales, le sexe et l'âge de chaque membre. Nous aimerions savoir certaines informations relatives à l'éducation et l'occupation du chef de ménage, au revenu, à la possession de biens, au logement lui-même ainsi qu'à l'hygiène et à l'assainissement dans le contexte de l'hygiène personnelle, de la préparation et de la manipulation des aliments, des sources d'eau et de la manipulation, de l'élimination des déchets, de la manipulation des animaux de ferme et domestiques ainsi que de l'élevage de ce ménage. Nous allons également demander où les membres de votre ménage obtiennent les soins si quelqu'un a une maladie causant de la fièvre ou toute autre maladie et les facteurs qui peuvent influencer sur l'utilisation des soins de santé des membres du ménage (c'est-à-dire les modalités de transport, la disponibilité d'assurance maladie, les facteurs culturels) en plus du statut vaccinal et de la perception de certaines maladies. Enfin, nous allons mesurer la position géographique de votre maison. Il n'y a pas de bonnes ou de mauvaises réponses. Vous êtes libre de choisir les questions à répondre. Somme toute, il devrait prendre environ 30-45 minutes pour répondre à toutes les questions. L'entretien peut prendre un peu plus de temps s'il y a beaucoup de membres dans ce ménage. En outre, nous visiterons votre ménage deux fois en différentes saisons (une fois pendant la saison sèche et une fois vers la fin de la saison des pluies) pendant la période totale de l'étude qui est de deux ans environ pour recueillir des données comme décrit dans ce paragraphe du formulaire de consentement.

### Participation

Vous, le décideur principal pour le comportement de santé quotidienne et l'utilisation des soins de santé dans ce ménage, ainsi que les membres de votre ménage, êtes libres de choisir d'accepter ou de refuser de participer à l'étude. Il n'y a aucun problème si vous ne voulez pas participer. Il n'y a non plus aucun problème si vous voulez arrêter votre participation à tout moment, et cela ne causera aucun tort à vous ou aux membres de votre ménage. Donc, la participation à cette étude est volontaire, et vous êtes libre de refuser de participer à l'étude ou vous pouvez retirer votre consentement à tout moment sans donner de raisons et ceci n'entraînera aucune pénalité.

### Risques et avantages

La participation à cette étude n'entraîne pas de risque direct. Poser des questions au sujet de votre ménage peut mettre mal à l'aise vous ou les membres de votre ménage. Après avoir terminé les questions, l'équipe de recherche pourra fournir des informations sur les soins de santé communautaires pour les participants qui expriment de la détresse. Vous pouvez refuser de répondre à toute question à tout moment. Vous pouvez faire une pause ou arrêter de participer à cette étude à tout moment. Il n'y a pas d'avantages directs à être dans cette étude. Au cours des visites de votre ménage, notre équipe de recherche peut identifier les membres de votre ménage qui devraient chercher des soins de santé pour les maladies causant de la fièvre et autres. Par conséquent, elle peut aider à fournir de l'information sur l'offre de soins établie dans votre communauté. Les avantages indirects sont que toutes les informations collectées contribueront à fournir des données exactes sur les problèmes de santé, y compris le statu socio-économique, le comportement d'hygiène et d'assainissement et le statut vaccinal des enfants dans votre communauté. Cela aidera à donner une meilleure compréhension des facteurs influençant la transmission de la maladie et l'infection, et à estimer le fardeau des maladies courantes ainsi qu'à trouver des moyens de prévenir et de traiter les personnes dans votre communauté.

### Coûts et Compensations

Il n'a pas de coûts pour les participants de cette étude. Ni vous ni aucune personne de votre ménage ne sera indemnisée d'avoir participé.

### Confidentialité

Tous les fichiers de l'étude et de toutes les informations qui identifient vous et les membres de votre ménage seront gardées confidentielles. Tous les questionnaires sur papier seront gardés en toute sécurité et les fichiers informatisés seront protégés par un mot de passe; tous les fichiers de données (sur papier/informatisés) seront stockés pour un minimum de cinq ans; ces fichiers seront accessibles seulement à quelques personnes autorisées de l'étude. Ni votre nom ni aucun identifiant ne sera utilisé dans les publications ou les rapports de

cette étude. Les informations que nous collectons à votre sujet et au sujet des membres de votre ménage seront partagées uniquement avec le personnel de l'étude autorisé et des représentants du comité d'éthique.

### Personnes de contact pour des questions

Si vous ou des membres de votre ménage avez des questions, s'il vous plaît, demandez maintenant à l'équipe de recherche ou à tout moment plus tard en contactant [ajouter le nom de l'investigateur principal et/ou du co-investigateur, leurs affiliations respectives et les numéros de téléphone]. Si vous avez des questions sur vos droits ou ceux des membres du ménage en tant que participant à l'étude, vous pouvez contacter [ajouter le nom et les coordonnées du comité d'éthique local].

### Déclaration de consentement

Ce formulaire de consentement pour participer à l'évaluation des soins de santé et d'autres facteurs liés à la population à [ajouter le site et pays] a été bien lu par moi/pour moi. L'objectif, les procédures, les risques et les avantages ont m'ont été expliqués en détails. J'ai été autorisé à poser des questions à tout moment, et mes questions ont été répondues à ma satisfaction par l'équipe de recherche. On m'a dit la personne à contacter en cas de questions ou si je veux discuter de problèmes ou préoccupations. On m'a dit que je recevrai une copie signée et datée de ce formulaire de consentement. Je suis rassuré que toutes les informations obtenues par suite de cette étude seront gardées confidentielles et utilisées uniquement aux fins de cette étude, et seulement par les institutions participantes.

Moi, le répondant, consens, par la présente, volontairement à participer à cette étude. Je suivrai les instructions de l'équipe de recherche et donnerai mon entière collaboration. Je comprends que j'ai le droit de me retirer de l'étude à tout moment.

#### RÉPONDANT

Nom : \_\_\_\_\_  
(prénom + deuxième prénom (si disponible) + nom de famille)

Signature : \_\_\_\_\_  
(Représentation manuscrite du nom/ marque que la personne écrit sur un document comme une preuve d'identité)

Date \_\_\_\_/\_\_\_\_/\_\_\_\_ (YY/MM/AAAA)

Empreinte du  
pouce

Si le répondant ne peut pas signer/est analphabète, mais accepte de participer, enregistre l'empreinte du pouce dans la boîte ci-dessus, et demande à un témoin adulte, alphabétisé et indépendant de l'étude (par exemple membre du même ménage ou un voisin), de signer ci-dessous :

#### TÉMOIN

Nom : \_\_\_\_\_  
(prénom + deuxième prénom (si disponible) + nom de famille)

Signature : \_\_\_\_\_  
(Représentation manuscrite du nom/ marque que la personne écrit sur un document comme une preuve d'identité)

Date \_\_\_\_/\_\_\_\_/\_\_\_\_ (YY/MM/AAAA)

Moi, l'enquêteur, j'ai lu/expliqué l'étude au répondant nommé ci-dessus (témoin si le répondant est analphabète) dans une langue que le répondant comprend bien. Je suis certain que le répondant a compris l'information et accepte qu'on lui pose des questions.

#### INTERVIEWER

Nom : \_\_\_\_\_  
(prénom + deuxième prénom (si disponible) + nom de famille)

Signature : \_\_\_\_\_  
(Représentation manuscrite du nom/ marque que la personne écrit sur un document comme une preuve d'identité)

Date \_\_\_\_/\_\_\_\_/\_\_\_\_ (YY/MM/AAAA)

Site \_\_\_\_ Sous-zone \_\_\_\_ Numéro d'habitation \_\_\_\_ Identifiant de l'enquêteur \_\_\_\_

### FORMULAIRE 3: INFORMATIONS GÉNÉRALES SUR LE MÉNAGE

#### Instructions pour l'enquêteur

- Compléter ce formulaire uniquement si la personne interrogée a consenti à participer (voir « Formulaire 2 — FORMULAIRE DE CONSENTEMENT ») ; la personne interrogée ainsi que définie pour cette enquête est un adulte (selon l'âge légal de majorité du pays), un membre du ménage et un décideur en ce qui concerne les soins de santé quotidiens et l'utilisation de soins de santé pour le ménage entier et ses membre ; il ne doit pas être, par exemple, un voisin ou un visiteur.
- Recueillir les données de tous les membres du ménage que tous les membres du ménage soient présents ou non au moment de l'entretien ; ne recueillir et n'inscrire les données que des personnes présentes au moment de l'entretien fausserait les données.
- Un ménage est défini/les membres d'un ménage sont définis comme une personne ou un groupe de personnes avec ou sans lien de parenté qui vivent ensemble dans la même unité d'habitation, qui reconnaissent un adulte de sexe masculin ou féminin comme chef de ménage, qui partagent les mêmes installations domestiques, qui sont considérés comme constituant une unité, et qui subviennent à leurs besoins en termes de nourriture et des autres éléments essentiels pour vivre.
- « Site » et « sous-zone » doivent être un numéro à trois chiffres, « numéro d'habitation » un numéro à quatre chiffres, et « identifiant de l'enquêteur » un numéro à deux chiffres (utiliser les listes préparées individuellement pour chaque site pour obtenir les codes) ; saisir « date » au format JJ/MM/AAAA et « heure » au format HH:MM et entourer MATIN ou APRÈS-MIDI. «Étiquette de l'étude» doit être une combinaison d'un code «site» à trois chiffres, d'un code «sous-zone» à trois chiffres et d'un code «numéro d'habitation» à quatre chiffres; le « identifiant de l'enquêteur » doit être un numéro à trois chiffres.

### FORMULAIRE 3: INFORMATIONS GÉNÉRALES SUR LE MÉNAGE

#### PARTIE A – DONNÉES DÉMOGRAPHIQUES/ INFORMATIONS GÉNÉRALES SUR LE MÉNAGE

##### EMPLACEMENT DU DOMICILE

#### 1 Numéros de site, de sous-zone et d'habitation

*Instructions :* Site (=site d'étude) et sous-zone (=plus petite unité du site d'étude) doivent être tous les deux des numéros à trois chiffres, et numéro d'habitation doit être un code à quatre chiffres ; utiliser les listes préparées individuellement pour obtenir les codes respectifs.

Site: \_\_\_\_ Sous-zone: \_\_\_\_ Numéro d'habitation: \_\_\_\_

#### 2 Coordonnées GPS

*Instructions :* Prendre les coordonnées GPS approximativement au centre de la maison. Inscrire l'altitude par un nombre à quatre chiffres (unité : mètre), et la latitude/longitude par un numéro à huit chiffres (unités : degrés, minutes décimales).

1=Ménage d'origine       2=Ménage de remplacement (côte droit/gauche du ménage d'origine)

Altitude: \_\_\_\_

Latitude: \_\_\_\_° \_\_\_\_'      Longitude: \_\_\_\_° \_\_\_\_'

##### PERSONNE INTERROGÉE

#### 3 Inscrire le nom complet de la personne interrogée.

*Instructions :* Inscrire le prénom, le deuxième nom (le cas échéant) et le nom de famille de la personne interrogée.

#### 4 Inscrire l'âge de la personne interrogée.

*Instruction :* Utiliser un numéro à trois chiffres (unité: année).      \_\_\_\_

#### 5 Inscrire le sexe de la personne interrogée.

1=Masculin       2=Féminin

#### 6 Quel est le lien de la personne interrogée avec le ménage ?

1=Chef de ménage       7=Conjoint du chef de ménage  
 2=Fils/fille du chef de ménage       8=Conjoint du fils/fille du chef de ménage

- 3=Frère/sœur du chef de ménage
- 4=Mère/père du chef de ménage
- 5=Petite-fille/petit-fils du chef de ménage
- 6=Autre, préciser \_\_\_\_\_
- 9=Conjoint du frère/sœur du chef de ménage
- 10=Belle-mère/beau-père du chef de ménage
- 11=Nièce/neveu du chef de ménage
- 98=Pas de réponse

**MEMBRES DU MÉNAGE**

**7 Combien de membres du ménage vivent dans ce domicile au total (au moment de la visite) ?**

*Instruction* : Utiliser un numéro à deux chiffres.

Nombre total de membres du ménage : \_\_\_\_

**8 Inscrire l'âge et le sexe de chaque membre du ménage.**

*Instructions* : Inscrire les initiales, l'âge et le sexe de la personne interrogée en première position/ligne du tableau. Les initiales, l'âge et le sexe de tous les autres membres du ménage doivent être inscrits ensuite. Les initiales d'un membre du ménage consistent en les trois premières lettres du prénom et les trois première lettre du nom de famille (un éventuel deuxième nom ne fait pas partie des initiales). Inscrire l'âge de chaque membre du ménage avec un numéro à trois chiffres (unité : années) ; si l'âge d'un des membres du ménage  $\leq 12$  mois, inscrire 1 an comme âge. Merci de compléter un formulaire supplémentaire si le ménage a plus de vingt membres.

| Membre du ménage<br>Identifiant | Initiales<br>[prénom/nom de famille] | Âge<br>[années] | Sexe                   |
|---------------------------------|--------------------------------------|-----------------|------------------------|
| 1/Personne interrogée           | ____/____                            | ____            | O1=Masculin O2=Féminin |
| 2                               | ____/____                            | ____            | O1=Masculin O2=Féminin |
| 3                               | ____/____                            | ____            | O1=Masculin O2=Féminin |
| 4                               | ____/____                            | ____            | O1=Masculin O2=Féminin |
| 5                               | ____/____                            | ____            | O1=Masculin O2=Féminin |
| 6                               | ____/____                            | ____            | O1=Masculin O2=Féminin |
| 7                               | ____/____                            | ____            | O1=Masculin O2=Féminin |
| 8                               | ____/____                            | ____            | O1=Masculin O2=Féminin |
| 9                               | ____/____                            | ____            | O1=Masculin O2=Féminin |
| 10                              | ____/____                            | ____            | O1=Masculin O2=Féminin |
| 11                              | ____/____                            | ____            | O1=Masculin O2=Féminin |
| 12                              | ____/____                            | ____            | O1=Masculin O2=Féminin |
| 13                              | ____/____                            | ____            | O1=Masculin O2=Féminin |
| 14                              | ____/____                            | ____            | O1=Masculin O2=Féminin |
| 15                              | ____/____                            | ____            | O1=Masculin O2=Féminin |
| 16                              | ____/____                            | ____            | O1=Masculin O2=Féminin |
| 17                              | ____/____                            | ____            | O1=Masculin O2=Féminin |
| 18                              | ____/____                            | ____            | O1=Masculin O2=Féminin |
| 19                              | ____/____                            | ____            | O1=Masculin O2=Féminin |
| 20                              | ____/____                            | ____            | O1=Masculin O2=Féminin |

**FORMULAIRE 3: INFORMATIONS GÉNÉRALES SUR LE MÉNAGE**  
**PARTIE B – DONNÉES SOCIO-ECONOMIQUES**

**ÉDUCATION**

- 1 Le chef de ménage sait-il lire en** [inscrire la langue officielle du site d'étude/pays] ?  
 1=Oui       2=Non       99=Ne sait pas       98=Pas de réponse
- 2 Le chef de ménage sait-il écrire en** [inscrire la langue officielle du site d'étude/pays] ?  
 1=Oui       2=Non       99=Ne sait pas       98=Pas de réponse
- 3 Quel est le niveau d'éducation scolaire le plus élevé atteint par le chef de ménage ?**  
 1=École primaire       4=Plus élevé que le lycée       99=Ne sait pas  
 2=Collège       5= PAS D'ÉDUCATION       98=Pas de réponse  
 3=Lycée       6=Autre, préciser \_\_\_\_\_

**PROFESSION/RESSOURCES FINANCIÈRES**

**4 Quelle est la profession principale du chef de ménage ?**

*Instructions : Inscrire le statut du jour de visite uniquement.*

- 1=Groupe 1 : Cadres  
 (directeurs généraux, hauts fonctionnaires, législateurs ; cadres administratifs et commerciaux ; responsables de production et de services spécialisés ; responsables dans l'hôtellerie, la vente et d'autres services)
- 2=Groupe 2 : Professionnels  
 (scientifiques ou ingénieurs ; professionnels de santé ; professionnels de l'enseignement ; professionnels de l'administration et des affaires ; professionnels de l'information et des technologies de communication ; professionnels du droit, du social ou de la culture)
- 3=Groupe 3 : Techniciens et professions intermédiaires  
 (Professions intermédiaires des sciences et techniques ; professions intermédiaires de la santé ; professions intermédiaires de l'administration et des affaires ; professions intermédiaires du droit, du social, de la culture et assimilés ; techniciens de l'information et des communications)
- 4=Groupe 4 : Employés de bureau  
 (secrétaires et dactylographes ; employé de service clientèle ; employé de conservation des données et de la documentation ; autres employés de bureau)
- 5=Groupe 5 : Travailleurs des services et de la vente  
 (travailleurs du service aux personnes ; travailleurs de la vente ; travailleurs des soins aux personnes ; travailleurs des services de protection)
- 6=Groupe 6 : Travailleurs qualifiés de l'agriculture, la sylviculture et la pêche  
 (travailleurs qualifiés de l'agriculture orientés marché ; éleveurs d'animaux ; travailleurs qualifiés de la sylviculture, la pêche et la chasse orientés marché ; agriculteurs, pêcheurs, chasseurs et cueilleurs de subsistance)
- 7=Groupe 7 : Travailleurs manuels et assimilés  
 (travailleurs de la construction et assimilés (à l'exception des électriciens) ; travailleurs de la métallurgie, sur machines et assimilés ; artisans et travailleurs de l'imprimerie ; travailleurs des métiers de l'électricité et de l'électronique ; travailleurs des métiers de la transformation des aliments, du bois, des vêtements et assimilés)
- 8=Groupe 8 : Opérateurs de machines et d'installations, et monteurs  
 (Opérateurs de machines et d'installations fixes ; monteurs ; conducteurs opérateurs d'installations mobiles)
- 9=Groupe 9 : Emplois non qualifiés  
 (agents d'entretien et assistants ; ouvriers de l'agriculture, la sylviculture et la pêche ; travailleurs des mines, de la construction, de l'industrie et des transports ; assistants à la préparation des aliments ; vendeurs et services de rue et assimilés ; travailleurs de la collecte des ordures et autres travailleurs non qualifiés)
- 10=Groupe 0 : Professions des forces armées  
 (officiers des forces armées ; sous-officiers des forces armées ; professions des forces armées, autres grades)
- 11=Autre, préciser \_\_\_\_\_
- 12=PAS DE PROFESSION       99=Ne sait pas       98=Pas de réponse

**5 Quel est le montant moyen des revenus mensuels du chef de ménage en lien avec à la profession indiquée en question 4 ainsi que celui des autres membre du ménage ?**

*Instruction* : Tick one answer per household head/enter one code per household member if applicable/if income available.

| Chef de ménage                    | Membre 1                                 | Membre 2                                                   | Membre 3                                |
|-----------------------------------|------------------------------------------|------------------------------------------------------------|-----------------------------------------|
| Code _____                        | Code _____                               | Code _____                                                 | Code _____                              |
| [1] <100USD<br>[2] ≥100 à <150USD | [3] ≥150 à <200USD<br>[4] ≥200 à <250USD | [5] ≥250USD<br>[6] PAS DE REVENU (chef de ménage; voir Q4) | [99] Ne sait pas<br>[98] Pas de réponse |

**6 Quels sont les autres sources ou les sources supplémentaires de revenus mensuels du ménage et quel en est le montant ?**

*Instruction* : Cocher plusieurs cases si nécessaire ; il peut y avoir plus d'une réponse.

| Autres sources/Sources supplémentaires                                                                                                                                                                                                                                                                                                                             | Revenus financiers mensuels globaux                                                                                                                                                                   |
|--------------------------------------------------------------------------------------------------------------------------------------------------------------------------------------------------------------------------------------------------------------------------------------------------------------------------------------------------------------------|-------------------------------------------------------------------------------------------------------------------------------------------------------------------------------------------------------|
| <input type="radio"/> 1=Aides sociales<br><input type="radio"/> 2=Assurances (publiques ou privées)<br><input type="radio"/> 3=Prêt (d'amis, de membres de la famille, d'une banque)<br><input type="radio"/> 4=Vente (bétail, récoltes, meubles, autres biens)<br><input type="radio"/> 5=Économies personnelles<br><input type="radio"/> 6=Autre, préciser _____ | <input type="radio"/> 1=<100 USD<br><input type="radio"/> 2=≥100 à <150 USD<br><input type="radio"/> 3=≥150 à <200 USD<br><input type="radio"/> 4=≥200 à <250 USD<br><input type="radio"/> 5=≥250 USD |
| <input type="radio"/> 7=PAS D'AUTRES SOURCES/DE SOURCES SUPPLÉMENTAIRES<br><input type="radio"/> 99=Ne sait pas<br><input type="radio"/> 98=Pas de réponse                                                                                                                                                                                                         |                                                                                                                                                                                                       |

**LOGEMENT/HABITATION**

**7 Les membres du ménage sont-ils propriétaires de l'habitation ?**

- 1=Oui       3=Non, logement fourni (par le gouvernement, un employeur)       99=Ne sait pas  
 2=Non, locataires       4=Non, autres, préciser \_\_\_\_\_       98=Pas de réponse

**8 Combien de pièces ou structures individuelles de l'habitation sont utilisées pour dormir, vivre, faire la cuisine ou se laver ?**

*Instruction* : N'indiquer qu'un code par catégorie.

| Chambre            | Salon                | Cuisine                                 | Salle de bain |
|--------------------|----------------------|-----------------------------------------|---------------|
| Code _____         | Code _____           | Code _____                              | Code _____    |
| [1] 1-2<br>[2] 3-4 | [2] >4<br>[2] Aucune | [99] Ne sait pas<br>[98] Pas de réponse |               |

**9 En quel matériau sont construits le sol, les murs et le toit des pièces/des structures individuelles de l'habitation ?**

*Instruction* : Indiquer tous les codes par catégorie ; plus d'une réponse par catégorie est possible.

| Sol                            | Murs                                           | Toit                                                     |
|--------------------------------|------------------------------------------------|----------------------------------------------------------|
| Code _____                     | Code _____                                     | Code _____                                               |
| [1] Brique<br>[2] Ciment/Béton | [3] Tuiles<br>[4] Terre<br>[6] Paille/feuilles | [5] Bois<br>[7] Métal/Étain<br>[8] Autre, préciser _____ |
|                                |                                                | [99] Ne sait pas<br>[98] Pas de réponse                  |

**10 Les membres de ce ménage ont-ils accès à/utilisent-ils l'électricité dans cette habitation ?**

- 1=Oui       2=Non       99=Ne sait pas       98=Pas de réponse

**11 À quelle source de lumière principale les membres de ce ménage ont-ils accès/Quelle source de lumière principale utilisent-ils ?**

- 1=Lumière/ampoule(s) électrique(s)       4=Lampe(s) à piles       7= Autre, préciser \_\_\_\_\_  
 2=Lumière du soleil/Lampe(s) solaire(s)       5=Bougie(s)       99=Ne sait pas  
 3=Lampe(s) à pétrole/à huile       6=PAS DE SOURCE DE LUMIÈRE       98=Pas de réponse

**BIENS DU MÉNAGE****12 Parmi les articles suivants, lesquels les membres du ménage possèdent-ils ?**

*Instructions* : Cocher plusieurs cases si nécessaire ; il peut y avoir plus d'une réponse ; indiquer la quantité d'articles fonctionnels si nécessaire

|                                             |               |                            |                                                                 |               |                            |
|---------------------------------------------|---------------|----------------------------|-----------------------------------------------------------------|---------------|----------------------------|
| <input type="radio"/> 1=Radio               | Quantité ____ | <input type="radio"/> Rien | <input type="radio"/> 11=Lecteur cassettes/CD                   | Quantité ____ | <input type="radio"/> Rien |
| <input type="radio"/> 2=Télévision          | Quantité ____ | <input type="radio"/> Rien | <input type="radio"/> 12=Ordinateur de bureau/portable/tablette | Quantité ____ | <input type="radio"/> Rien |
| <input type="radio"/> 3=Connexion internet  | Quantité ____ | <input type="radio"/> Rien | <input type="radio"/> 13=Téléphone portable                     | Quantité ____ | <input type="radio"/> Rien |
| <input type="radio"/> 4=Voiture             | Quantité ____ | <input type="radio"/> Rien | <input type="radio"/> 14=Camion/bus                             | Quantité ____ | <input type="radio"/> Rien |
| <input type="radio"/> 5=Moto                | Quantité ____ | <input type="radio"/> Rien | <input type="radio"/> 15=Vélo                                   | Quantité ____ | <input type="radio"/> Rien |
| <input type="radio"/> 6=Char à bœufs/ânes   | Quantité ____ | <input type="radio"/> Rien | <input type="radio"/> 16=Lit                                    | Quantité ____ | <input type="radio"/> Rien |
| <input type="radio"/> 7=Matelas             | Quantité ____ | <input type="radio"/> Rien | <input type="radio"/> 17=Moustiquaire                           | Quantité ____ | <input type="radio"/> Rien |
| <input type="radio"/> 8=Table               | Quantité ____ | <input type="radio"/> Rien | <input type="radio"/> 18=Chaise                                 | Quantité ____ | <input type="radio"/> Rien |
| <input type="radio"/> 9=Réfrigérateur (4°C) | Quantité ____ | <input type="radio"/> Rien | <input type="radio"/> 19=Congélateur (-20°C)                    | Quantité ____ | <input type="radio"/> Rien |
| <input type="radio"/> 10=Ventilateur        | Quantité ____ | <input type="radio"/> Rien | <input type="radio"/> 20=Machine à coudre                       | Quantité ____ | <input type="radio"/> Rien |





- 3=Oui, cuisine intérieure/dans une pièce/structure individuelle d'habitation ; sur la propriété d'un ménage voisin (privée, partagée)  
 4=Oui, cuisine extérieure/hors d'une pièce/structure individuelle d'habitation/ en plein air ; sur la propriété d'un ménage voisin (privée, partagée)  
 5=PAS DE CUISINE  
 6=Autre, préciser \_\_\_\_\_  99=Ne sait pas  98=Pas de réponse

**6 Quelle source d'énergie les membres de ce ménage utilisent-ils habituellement pour cuisiner/préparer la nourriture/les repas ?**

- 1=Électricité  3=Charbon de bois  5=Excréments d'animaux  99=Ne sait pas  
 2=Gaz/pétrole  4=Bois/paille/feuilles  6=Autre, préciser \_\_\_\_\_  98=Pas de réponse

**7 Quelle moyen de cuisson les membres de ce ménage utilisent-ils habituellement pour cuisiner/préparer la nourriture/les repas ?**

- 1=Foyer ouvert  3=Fourneau intérieur avec cheminée  99=Ne sait pas  
 2=Fourneau extérieur  4=Autre, préciser \_\_\_\_\_  98=Pas de réponse

**8 Où les membres de ce ménage conservent-ils habituellement les produits alimentaires frais/crus (comme les légumes, la salade, les fruits, les produits laitiers, les œufs, la viande et le poisson) et les restes/les aliments/repas préparés ?**

*Instruction* : Indiquer un code par catégorie uniquement. À l'intérieur signifie à l'intérieur d'une pièce/d'une habitation individuelle/d'un bâtiment ; à l'extérieur signifie à l'extérieur d'une pièce/d'une habitation individuelle/d'un bâtiment.

| Des produits alimentaires frais/crus (légumes, salade, fruits, produits laitiers, œufs, viande et poisson)                                                                                                                                                                                                                                                                                                                                                                                                                                                                                                                                                                                                                          | Des restes/aliments/repas préparés |
|-------------------------------------------------------------------------------------------------------------------------------------------------------------------------------------------------------------------------------------------------------------------------------------------------------------------------------------------------------------------------------------------------------------------------------------------------------------------------------------------------------------------------------------------------------------------------------------------------------------------------------------------------------------------------------------------------------------------------------------|------------------------------------|
| Code _____                                                                                                                                                                                                                                                                                                                                                                                                                                                                                                                                                                                                                                                                                                                          | Code _____                         |
| [1] À température ambiante (à l'intérieur, sur la propriété du ménage, privé)<br>[2] À température ambiante (à l'extérieur, sur la propriété du ménage, privé)<br>[3] À température ambiante (à l'intérieur, sur la propriété d'un ménage voisin, privé, partagé)<br>[4] À température ambiante (à l'extérieur, sur la propriété d'un ménage voisin, privé, partagé)<br>[5] Réfrigérateur (sur la propriété du ménage, privé)<br>[6] Réfrigérateur (sur la propriété d'un ménage voisin, privé, partagé)<br>[7] Congélateur (sur la propriété du ménage, privé)<br>[8] Congélateur (sur la propriété d'un ménage voisin, privé, partagé)<br>[9] Autre, préciser _____ [10] PAS DE CONSERVATION [99] Ne sait pas [98] Pas de réponse |                                    |

**9 Si la réponse à la question 8 au sujet des produits alimentaires frais/crus et/ou des restes/aliments/repas préparés est «température ambiante», combien de temps les membres de ce ménage les conservent-ils habituellement?**

*Instruction*: Indiquer un code par catégorie uniquement.

| Des produits alimentaires frais/crus (légumes, salade, fruits, produits laitiers, œufs, viande et poisson)      | Des restes/aliments/repas préparés |
|-----------------------------------------------------------------------------------------------------------------|------------------------------------|
| Code _____                                                                                                      | Code _____                         |
| [1] <1 jour [3] 3-4 jours [5] Pas applicable [99] Ne sait pas<br>[2] 1-2 jours [4] >4 jours [98] Pas de réponse |                                    |

**10 Les membres de ce ménage couvrent-ils habituellement les restes/aliments/repas préparés? Réchauffent-ils/recuisent-ils les restes/aliments/repas préparés avant de les consommer?**

*Instruction* : Indiquer un code par catégorie uniquement.

| Couvrent les restes/les aliments/repas préparés      | Réchauffent/Recuisent les restes/les aliments/repas préparés |
|------------------------------------------------------|--------------------------------------------------------------|
| Code _____                                           | Code _____                                                   |
| [1] Oui [2] Non [99] Ne sait pas [98] Pas de réponse |                                                              |

**11 Quel membre(s) de ce ménage cuisine(s)/prépare(s) la nourriture/les repas habituellement pour les autres membres de ce ménage ?**

*Instructions :* Se référer à la question 9 du « Formulaire 3 Partie A – Données démographiques/Informations générales sur le ménage » et indiquer les initiales/ Identifiant (s) du membre.

- Membre du ménage, indiquer les initiales/identificateur(s) \_\_\_\_\_  
 99=Ne sait pas  98=Pas de réponse

**12 Comment le(s) membre(s) de la famille qui cuisine(nt)/prépare(nt) la nourriture/les repas habituellement pour les autres membres de ce ménage comme indiqué à la question 11 se prépare(nt)-t-il(s)/elle(s) habituellement avant et après la préparation des repas?**

*Instruction:* Indiquer un code par catégorie uniquement.

| Avant la préparation des repas                                   | Après la préparation des repas               |
|------------------------------------------------------------------|----------------------------------------------|
| Code _____                                                       | Code _____                                   |
| [1] Lavent les mains avec du savon et de l'eau                   | [6] Ne lavent pas, pas besoin/pas sale       |
| [2] Lavent les mains avec de l'eau uniquement                    | [7] Ne lavent pas, rien pour laver les mains |
| [3] Frottent les mains avec des feuilles/de la paille/de l'herbe | [8] Autre, préciser _____                    |
| [4] Frottent les mains avec du sable                             | [99] Ne sait pas                             |
| [5] Frottent les mains avec un chiffon/du tissu                  | [98] Pas de réponse                          |

**13 Comment les membres de ce ménage se préparent-ils habituellement avant et après avoir mangé de la nourriture/des repas, y compris le membre du ménage qui cuisine/prépare la nourriture/les repas habituellement comme indiqué à la question 11?**

*Instruction :* Indiquer un code par catégorie uniquement.

| Avant la préparation des repas                                   | Après la préparation des repas               |
|------------------------------------------------------------------|----------------------------------------------|
| Code _____                                                       | Code _____                                   |
| [1] Lavent les mains avec du savon et de l'eau                   | [6] Ne lavent pas, pas besoin/pas sale       |
| [2] Lavent les mains avec de l'eau uniquement                    | [7] Ne lavent pas, rien pour laver les mains |
| [3] Frottent les mains avec des feuilles/de la paille/de l'herbe | [8] Autre, préciser _____                    |
| [4] Frottent les mains avec du sable                             | [99] Ne sait pas                             |
| [5] Frottent les mains avec un chiffon/du tissu                  | [98] Pas de réponse                          |

**14 Comment les membres de ce ménage mangent-ils habituellement leur nourriture/leurs repas, y compris le membre du ménage qui cuisine/prépare la nourriture/les repas habituellement comme indiqué à la question 11?**

- 1=Avec des couverts  3=Autre, préciser \_\_\_\_\_  99=Ne sait pas  
 2=Avec les doigts  98=Pas de réponse

**15 Les membres de ce ménage mangent-ils habituellement leur nourriture/leurs repas dans le même récipient, y compris le membre du ménage qui cuisine/prépare la nourriture/les repas habituellement comme indiqué à la question 11?**

- 1=Oui  2=Non  99=Ne sait pas  98=Pas de réponse

**16 Où les membres de ce ménage obtiennent-ils habituellement leurs produits alimentaires frais/crus principaux comme les légumes, les fruits, les grains/céréales, les produits laitiers, les œufs, la viande et le poisson?**

*Instruction :* Indiquer un code par catégorie uniquement.

| Légumes, fruits, grains/céréales             | Produits laitiers                         | Œufs, viande, poisson |
|----------------------------------------------|-------------------------------------------|-----------------------|
| Code _____                                   | Code _____                                | Code _____            |
| [1] Agriculture vivrière (cour/arrière-cour) | [6] Agriculture vivrière (terre agricole) |                       |
| [2] Supermarché/Épicerie                     | [7] Boucher                               |                       |
| [3] Amis/famille                             | [8] Autre, préciser _____                 |                       |
| [4] Marché ouvert                            | [99] Ne sait pas                          |                       |
| [5] Vendeur de rue                           | [98] Pas de réponse                       |                       |



**l'habitation/de la/les structure(s) individuelle(s) d'habitation(s), les vêtements/les outils de cuisine) ?**

*Instruction* : Indiquer un code par catégorie uniquement.

| Boisson                                                                                                                                                                                                                                                                                                                                                                                                                                                                                                                                                                                                                                                                                                                                                                                                                                                                                                    | Cuisine    | Bain       | Nettoyage  |
|------------------------------------------------------------------------------------------------------------------------------------------------------------------------------------------------------------------------------------------------------------------------------------------------------------------------------------------------------------------------------------------------------------------------------------------------------------------------------------------------------------------------------------------------------------------------------------------------------------------------------------------------------------------------------------------------------------------------------------------------------------------------------------------------------------------------------------------------------------------------------------------------------------|------------|------------|------------|
| Code _____                                                                                                                                                                                                                                                                                                                                                                                                                                                                                                                                                                                                                                                                                                                                                                                                                                                                                                 | Code _____ | Code _____ | Code _____ |
| [1] Eau du robinet (à l'intérieur de l'habitation ; privée)<br>[2] Eau du robinet (à l'extérieur de l'habitation : cour/arrière-cour ; privée)<br>[3] Eau du robinet (à l'extérieur de l'habitation ; publique/partagée)<br>[4] Borne-fontaine/eau courante (à l'intérieur de l'habitation ; privée)<br>[5] Borne-fontaine/eau courante (à l'extérieur de l'habitation : cour/arrière-cour ; privée)<br>[6] Borne-fontaine/eau courante (à l'extérieur de l'habitation ; publique/partagée)<br>[7] Camion-citerne (public ; partagé)<br>[8] Eaux de surface (canal, canal d'irrigation)<br>[9] Eaux de surface (lac, étang, rivière, ruisseau)<br>[10] Eau de source<br>[11] Eau de pluie<br>[12] Puits/Puits de forage (en plein air/non couvert/non protégé)<br>[13] Puits/Puits de forage (couvert/protégé)<br>[14] Eau en bouteille<br>[15] Autre, préciser _____ [99] Ne sait pas [98] Pas de réponse |            |            |            |

**21 Les membres de ce ménage traitent-ils habituellement l'eau pour la boisson, la cuisine/la préparation des aliments/des repas, le bain, et le nettoyage (de l'habitation/des/de la structure(s) individuelle(s) d'habitation(s), des vêtements/des outils de cuisine) avant la consommation ? Comment l'eau est-elle habituellement traitée ?**

*Instruction*: Indiquer tous les codes nécessaires par catégorie ; plus d'une réponse par catégorie est possible.

| Boisson                                                                                                                                                                                                                                                                                                                                                                                                                                                                                | Cuisine    | Bain       | Nettoyage  |
|----------------------------------------------------------------------------------------------------------------------------------------------------------------------------------------------------------------------------------------------------------------------------------------------------------------------------------------------------------------------------------------------------------------------------------------------------------------------------------------|------------|------------|------------|
| Code _____                                                                                                                                                                                                                                                                                                                                                                                                                                                                             | Code _____ | Code _____ | Code _____ |
| [1] Non, pas du tout<br>[2] Non, seulement pour les malades du ménage<br>[3] Non, seulement selon la saison (saison sèche)<br>[4] Oui, par filtration (tissu, céramique, sable)<br>[5] Oui, par sédimentation<br>[6] Autre, préciser _____<br>[7] Non, seulement pour les enfants du ménage<br>[8] Non, seulement selon la saison (saison humide)<br>[9] Oui, par ébullition<br>[10] Oui, par désinfection solaire<br>[11] Oui, par chloration<br>[99] Ne sait pas [98] Pas de réponse |            |            |            |

**22 Quel(s) membre(s) de ce ménage recueille(nt) habituellement l'eau potable comme indiqué à la question 20 pour les autres membres de ce ménage ?**

*Instructions* : Se référer à la question 9 du « Formulaire 3 Partie A – Données démographiques/Informations générales sur le ménage » et indiquer/identifiant les initiales du membre.

- Membre du ménage, indiquer les initiales/identifiant(s) \_\_\_\_\_  
 99=Ne sait pas  98=Pas de réponse

**23 Comment les membres de ce ménage conservent-ils habituellement l'eau potable indiquée à la question 20?**

- |                                                                                          |                                                                                                                                   |
|------------------------------------------------------------------------------------------|-----------------------------------------------------------------------------------------------------------------------------------|
| <input type="radio"/> 1=Réservoir d'eau (non couvert)                                    | <input type="radio"/> 10=Bol (couvert par chiffon/tissu, couvercle, feuilles)                                                     |
| <input type="radio"/> 2=Réservoir d'eau (couvert par chiffon/tissu, couvercle, feuilles) | <input type="radio"/> 11=Pot en bois (non couvert)                                                                                |
| <input type="radio"/> 3=Récipient (non couvert)                                          | <input type="radio"/> 12= Pot en bois (couvert par chiffon/ tissu, couvercle, feuilles)                                           |
| <input type="radio"/> 4=Récipient (couvert par chiffon/tissu, couvercle, feuilles)       | <input type="radio"/> 13= Récipient en peau (chèvre, mouton, bovins, non couvert)                                                 |
| <input type="radio"/> 5=Pot en terre (non couvert)                                       | <input type="radio"/> 14=Récipient en peau (chèvre, mouton, bovins ; couvert par un chiffon/du tissu, un couvercle, des feuilles) |
| <input type="radio"/> 6=Pot en terre (couvert par chiffon/tissu, couvercle, feuilles)    | <input type="radio"/> 15=NON CONSERVÉE                                                                                            |
| <input type="radio"/> 7=Seau (non couvert)                                               | <input type="radio"/> 16=Autre, préciser _____                                                                                    |

- 8=Seau (couvert par chiffon/tissu, couvercle, feuilles)       99=Ne sait pas  
 9=Bol (non couvert)       98= Pas de réponse

**24 Si les membres de ce ménage utilisent une source d'approvisionnement en eau potable partagée comme indiqué à la question 20, par combien de personnes cette eau potable est-elle partagée ?**

- 1=<10 personnes       3=25-49 personnes       5=NON PARTAGÉE       99=Ne sait pas  
 2=11-24 personnes       4=>50 personnes       98=Pas de réponse

**TRAITEMENT DES DÉCHETS**

**25 Où les membres de ce ménage jettent-ils habituellement les eaux usées de, par exemple, la cuisine/la préparation des aliments/repas, le bain et/ou le ménage, et jettent-ils habituellement les déchets domestiques, les déchets humains/déjections ?**

*Instruction:* Indiquer un code par catégorie uniquement.

| Eaux usées de par exemple cuisine/préparation des aliments/repas, bain et/ou ménage                                                                                                                                                                                                                                                                                                                                                                                                                                                                                                                                                                                                                                                                                                                                                                                                                                                                                                                                                                                             | Déchets domestiques | Déchets humains/déjections |
|---------------------------------------------------------------------------------------------------------------------------------------------------------------------------------------------------------------------------------------------------------------------------------------------------------------------------------------------------------------------------------------------------------------------------------------------------------------------------------------------------------------------------------------------------------------------------------------------------------------------------------------------------------------------------------------------------------------------------------------------------------------------------------------------------------------------------------------------------------------------------------------------------------------------------------------------------------------------------------------------------------------------------------------------------------------------------------|---------------------|----------------------------|
| Code _____                                                                                                                                                                                                                                                                                                                                                                                                                                                                                                                                                                                                                                                                                                                                                                                                                                                                                                                                                                                                                                                                      | Code _____          | Code _____                 |
| [1] Sur le sol/surface libre proche de l'habitation (cour/arrière-cour, privé)<br>[2] Sur le sol/surface libre loin de l'habitation dans la communauté (partagé, public)<br>[3] Dans un trou proche de la maison (cour/arrière-cour, privé)<br>[4] Dans un trou loin de la maison dans la communauté (partagé, public)<br>[5] Versement dans des eaux de surface dans la communauté (lac, étang, rivière, ruisseau, public, partagé)<br>[6] Versement dans des eaux de surface dans la communauté (canal, canal d'irrigation, public, partagé)<br>[7] Versement dans de l'eau de source dans la communauté (public, partagé)<br>[8] Versement dans une fosse septique proche de l'habitation (cour/arrière-cour, proche de toilettes si disponibles, privé)<br>[9] Versement dans une fosse septique dans la communauté (partagé, public)<br>[10] Versement dans les égouts proches de la maison (cour/arrière-cour, privé)<br>[11] Versement dans les égouts dans la communauté (partagé, public)<br>[12] Autre, préciser _____      [99] Ne sait pas      [98] Pas de réponse |                     |                            |

**26 Les membres de ce ménage traitent-ils habituellement les déchets domestiques de la maison au préalable avant de les jeter ?**

- 1=Oui, incinération des déchets       3=NON  
 2=Oui, séparation/tri des déchets dégradables et non dégradables       4=Oui, Autre, préciser \_\_\_\_\_  
 99=Ne sait pas       98=Pas de réponse

**27 À quelle distance de la source d'approvisionnement en eau de ce ménage comme indiqué à la question 20 se trouve l'emplacement de l'élimination des eaux usées, des déchets domestiques et humains/excréments de ce ménage comme indiqué à la question 25 ?**

*Instructions :* Indiquer un code par catégorie uniquement. Indiquer la distance en mètres [m].

| Eaux usées de, par exemple, cuisine/préparation des aliments/repas, bain et/ou ménage                                                                                                  | Déchets domestiques | Déchets humains/déjections |
|----------------------------------------------------------------------------------------------------------------------------------------------------------------------------------------|---------------------|----------------------------|
| Code _____                                                                                                                                                                             | Code _____          | Code _____                 |
| [1] <5 m      [3] ≥25 à <50 m      [5] ≥100 à <500 m      [7] ≥1,000 m<br>[2] ≥5 à <25 m      [4] ≥50 à <100 m      [6] ≥500 à <1,000 m      [99] Ne sait pas      [98] Pas de réponse |                     |                            |

**28 À quelle distance de la source d'approvisionnement en eau principale de ce ménage pour la cuisine/la préparation des aliments/des repas comme indiqué à la question 20 se trouve l'emplacement de l'élimination des eaux usées, des déchets domestiques et humains/excréments de ce ménage comme indiqué à la question 25 ?**

*Instructions :* Indiquer un code par catégorie uniquement. Indiquer la distance en mètres [m].

| Eaux usées de par exemple cuisine/préparation des aliments/repas, bain et/ou ménage | Déchets domestiques | Déchets humains/excréments |
|-------------------------------------------------------------------------------------|---------------------|----------------------------|
| Code _____                                                                          | Code _____          | Code _____                 |

|                |                  |                                      |
|----------------|------------------|--------------------------------------|
| Code _____     | Code _____       | Code _____                           |
| [1] <5 m       | [3] ≥25 à <50 m  | [5] ≥100 à <500 m                    |
| [2] ≥5 à <25 m | [4] ≥50 à <100 m | [6] ≥500 à <1,000 m                  |
|                |                  | [7] ≥1,000 m                         |
|                |                  | [99] Ne sait pas [98] Pas de réponse |

### ANIMAUX DE FERME/DOMESTIQUES

#### 29 Quel genre d'animaux/de bétail et d'animaux domestiques/de compagnie les membres de ce ménage possèdent-ils ?

*Instruction* : Cocher plusieurs cases par catégorie si nécessaire ; il peut y avoir plus d'une réponse par catégorie.

| Animaux de ferme/bétail                                                                     |                                                           | Animaux domestiques/de compagnie                               |
|---------------------------------------------------------------------------------------------|-----------------------------------------------------------|----------------------------------------------------------------|
| <input type="radio"/> 1=Bovin                                                               | <input type="radio"/> 9=Chameau                           | <input type="radio"/> 1=Chien                                  |
| <input type="radio"/> 2=Mouton                                                              | <input type="radio"/> 10=Rongeurs (lapin), préciser _____ | <input type="radio"/> 2=Rongeurs (lapin), préciser _____       |
| <input type="radio"/> 3=Âne                                                                 | <input type="radio"/> 11=Chèvre                           | <input type="radio"/> 3=Chat                                   |
| <input type="radio"/> 4= Volaille (i.e. poulet, canard, pigeon, oie, dinde), préciser _____ | <input type="radio"/> 12=Cheval                           | <input type="radio"/> 4=PAS D'ANIMAUX DOMESTIQUES/DE COMPAGNIE |
| <input type="radio"/> 5=Zébu                                                                | <input type="radio"/> 13=PAS D'ANIMAUX DE FERME/DE BÉTAIL | <input type="radio"/> 5=Autre, préciser _____                  |
| <input type="radio"/> 6=Cochon                                                              | <input type="radio"/> 14=Autre, préciser _____            | <input type="radio"/> 99=Ne sait pas                           |
| <input type="radio"/> 7=Poisson                                                             | <input type="radio"/> 99=Ne sait pas                      | <input type="radio"/> 98=Pas de réponse                        |
| <input type="radio"/> 8=Buffle                                                              | <input type="radio"/> 98=Pas de réponse                   |                                                                |

#### 30 Où les membres de ce ménage gardent-ils habituellement les animaux de ferme/le bétail et les animaux domestiques/de compagnie de ce ménage comme indiqué à la question 29 ?

*Instruction* : Indiquer un code par catégorie uniquement.

| Animaux de ferme/bétail                                                                                                              | Animaux domestiques/de compagnie                                                                 |
|--------------------------------------------------------------------------------------------------------------------------------------|--------------------------------------------------------------------------------------------------|
| <input type="radio"/> 1=Étable/Cage/Bassin d'eau sur la propriété de l'habitation (arrière-cour/cour)                                | <input type="radio"/> 1=Cage/Chaîne proche de l'habitation (arrière-cour/cour)                   |
| <input type="radio"/> 2=Étable/Cage/Bassin d'eau à l'extérieur de l'habitation dans la communauté                                    | <input type="radio"/> 2= Cage/Chaîne à l'extérieur de l'habitation dans la communauté            |
| <input type="radio"/> 3=Étable/Cage/Bassin d'eau à l'extérieur de la communauté                                                      | <input type="radio"/> 3= Cage/Chaîne à l'extérieur de la communauté (public)                     |
| <input type="radio"/> 4=Surface libre/Eaux de surface/Eau de source sur la propriété de l'habitation (habitation, arrière-cour/cour) | <input type="radio"/> 4=Surface libre proche de l'habitation (dans la maison, arrière-cour/cour) |
| <input type="radio"/> 5=Surface libre/Eaux de surface/Eau de source à l'extérieur de l'habitation dans la communauté                 | <input type="radio"/> 5=Surface libre à l'extérieur de l'habitation dans la communauté           |
| <input type="radio"/> 6=Surface libre/Eaux de surface/Eau de source à l'extérieur de la communauté                                   | <input type="radio"/> 6=Surface libre à l'extérieur de la communauté                             |
| <input type="radio"/> 7=Pas applicable (nulle part /pas d'animaux de ferme/bétail)                                                   | <input type="radio"/> 7=Pas applicable (nulle part/pas d'animaux domestiques/de compagnie)       |
| <input type="radio"/> 8=Autre, préciser _____                                                                                        | <input type="radio"/> 8=Autre, préciser _____                                                    |
| <input type="radio"/> 99=Ne sait pas                                                                                                 | <input type="radio"/> 99=Ne sait pas                                                             |
| <input type="radio"/> 98=Pas de réponse                                                                                              | <input type="radio"/> 98=Pas de réponse                                                          |

#### 31 Quelle est l'importance de l'élevage que les membres de ce ménage pratiquent ?

- |                                                                               |                                               |
|-------------------------------------------------------------------------------|-----------------------------------------------|
| <input type="radio"/> 1=Pour leurs propres besoins («élevage d'arrière-cour») | <input type="radio"/> 4=Autre, préciser _____ |
| <input type="radio"/> 2=Pas applicable (pas d'élevage)                        | <input type="radio"/> 99=Ne sait pas          |
| <input type="radio"/> 3=3=Demande massive/industrielle («élevage intensif»)   | <input type="radio"/> 98=Pas de réponse       |

**32 Quel approvisionnement en eau les membres de ce ménage utilisent-ils pour fournir de l'eau aux animaux de ferme/au bétail et aux animaux domestiques/de compagnie de ce ménage comme indiqué à la question 29 ?**

*Instruction* : Indiquer un code par catégorie uniquement.

| Animaux de ferme/bétail                                                                      | Animaux domestiques/de compagnie     |
|----------------------------------------------------------------------------------------------|--------------------------------------|
| Code _____                                                                                   | Code _____                           |
| [1] Eau du robinet (à l'intérieur de l'habitation ; privée)                                  |                                      |
| [2] Eau du robinet (à l'extérieur de l'habitation : cour/arrière-cour ; privée)              |                                      |
| [3] Eau du robinet (à l'extérieur de l'habitation ; publique/partagée)                       |                                      |
| [4] Borne-fontaine/eau courante (à l'intérieur de l'habitation ; privée)                     |                                      |
| [5] Borne-fontaine/eau courante (à l'extérieur de l'habitation : cour/arrière-cour ; privée) |                                      |
| [6] Borne-fontaine/eau courante (à l'extérieur de l'habitation ; publique/partagée)          |                                      |
| [7] Camion-citerne (public ; partagé)                                                        |                                      |
| [8] Eaux de surface (canal, canal d'irrigation)                                              |                                      |
| [9] Eaux de surface (lac, étang, rivière, ruisseau)                                          |                                      |
| [10] Eau de source                                                                           |                                      |
| [11] Eau de pluie                                                                            |                                      |
| [12] Puits/Puits de forage (en plein air/non couvert/non protégé)                            |                                      |
| [13] Puits/Puits de forage (couvert/protégé)                                                 |                                      |
| [14] Pas applicable (pas d'animaux de ferme/bétail; pas d'animaux domestiques/de compagnie)  |                                      |
| [15] Autre, préciser _____                                                                   | [99] Ne sait pas [98] Pas de réponse |

**33 Les membres de ce ménage se lavent-ils habituellement les mains après avoir nourri, donné de l'eau et nettoyé l'étable/la cage/le bassin d'eau des animaux de ferme/du bétail de ce ménage comme indiqué à la question 29 ?**

*Instruction* : Indiquer un code par catégorie uniquement.

| Animaux de ferme/bétail                                          | Animaux domestiques/de compagnie                                                            |
|------------------------------------------------------------------|---------------------------------------------------------------------------------------------|
| Code _____                                                       | Code _____                                                                                  |
| [1] Lavent les mains avec du savon et de l'eau                   | [7] Ne lavent pas, rien pour laver les mains                                                |
| [2] Lavent les mains avec de l'eau uniquement                    | [8] Autre, préciser _____                                                                   |
| [3] Frottent les mains avec des feuilles/de la paille/de l'herbe | [9] Pas applicable (pas d'animaux de ferme/bétail ; pas d'animaux domestiques/de compagnie) |
| [4] Frottent les mains avec du sable                             |                                                                                             |
| [5] Frottent les mains avec un chiffon/du tissu                  |                                                                                             |
| [6] Ne lavent pas, pas besoin/pas sale                           | [99] Ne sait pas [98] Pas de réponse                                                        |

**CULTURES AGRICOLES**

**34 Quel genre de cultures les membres de ce ménage font-ils pousser/cultivent-ils ?**

*Instruction* : Cocher plusieurs cases si nécessaire ; il peut y avoir plus d'une réponse.

- |                                                                      |                                                |
|----------------------------------------------------------------------|------------------------------------------------|
| <input type="radio"/> 1=Café                                         | <input type="radio"/> 10=Tabac                 |
| <input type="radio"/> 2=Riz                                          | <input type="radio"/> 11=Canne à Sucre         |
| <input type="radio"/> 3=Fruits (cultivés sur arbustes/arbre)         | <input type="radio"/> 12=Chad/Chat             |
| <input type="radio"/> 4=Fruits (cultivés au sol)                     | <input type="radio"/> 13=Bees/Honey            |
| <input type="radio"/> 5=Légumes/salade (cultivés sur arbustes/arbre) | <input type="radio"/> 14=Coton                 |
| <input type="radio"/> 6=Légumes/salade (cultivés au sol)             | <input type="radio"/> 15=PAS DE CULTURES       |
| <input type="radio"/> 7=Céréales (blé, orge, avoine, maïs)           | <input type="radio"/> 16=Autre, préciser _____ |
| <input type="radio"/> 8=Thé                                          | <input type="radio"/> 99=Ne sait pas           |
| <input type="radio"/> 9=Noix de cajou                                | <input type="radio"/> 98=Pas de réponse        |

**35 Où les champs/terres agricoles des membres de ce ménage se situent-ils/elles?**

- |                                                                             |                                                                          |
|-----------------------------------------------------------------------------|--------------------------------------------------------------------------|
| <input type="radio"/> 1=On the property of the house (i.e. back-/courtyard) | <input type="radio"/> 4=Outside the house in the community               |
| <input type="radio"/> 2=Outside the community                               | <input type="radio"/> 5=Not applicable (no crop farming)                 |
| <input type="radio"/> 3=Other, specify _____                                | <input type="radio"/> 99=Don't know <input type="radio"/> 98=No response |

**36 Quelle est l'importance des cultures des membres de ce ménage?**

- 1=Leurs propres besoins (« agriculture d'arrière-cour »)       4=Autre, préciser \_\_\_\_\_  
 2=Pas applicable (pas de cultures)       99=Ne sait pas  
 3=Demande massive/industrielle (agriculture intensive)       98= Pas de réponse

**37 Les membres de ce ménage utilisent-ils habituellement des herbicides, pesticides et engrais pour les cultures indiquées à la question 34?**

*Instruction* : Indiquer un code par catégorie uniquement.

| Herbicides                                               | Pesticides                                               | Engrais                                                  |
|----------------------------------------------------------|----------------------------------------------------------|----------------------------------------------------------|
| <input type="radio"/> 1=Oui, préciser l'herbicide        | <input type="radio"/> 1=Oui, préciser le pesticide       | <input type="radio"/> 1=Oui, préciser l'engrais          |
| <input type="radio"/> 2=Pas applicable (pas de cultures) | <input type="radio"/> 2=Pas applicable (pas de cultures) | <input type="radio"/> 2=Pas applicable (pas de cultures) |
| <input type="radio"/> 3=Pas d'utilisation des herbicides | <input type="radio"/> 3=Pas d'utilisation des pesticides | <input type="radio"/> 3=Pas d'utilisation des engrais    |
| <input type="radio"/> 99=Ne sait pas                     | <input type="radio"/> 99=Ne sait pas                     | <input type="radio"/> 99=Ne sait pas                     |
| <input type="radio"/> 98=Pas de réponse                  | <input type="radio"/> 98=Pas de réponse                  | <input type="radio"/> 98=Pas de réponse                  |

**38 Les membres de ce ménage se lavent-ils les mains après avoir travaillé dans les terres agricoles pour les cultures indiquées à la question 34 ?**

- 1=Oui, se lavent les mains avec du savon et de l'eau       6=Oui, se frottent les mains avec du sable  
 2=Oui, se frottent les mains avec des feuilles/de la paille/de l'herbe       7=Non, ne se lavent pas les mains  
 3=Oui, se frottent les mains avec des chiffons/du tissu       8=Autre, préciser \_\_\_\_\_  
 4=Pas applicable (pas de cultures)       99=Ne sait pas  
 5=Oui, se lavent les mains avec de l'eau uniquement       98= Pas de réponse



Site \_\_\_\_ Sous-zone \_\_\_\_ Numéro d'habitation \_\_\_\_ Identifiant de l'enquêteur \_\_\_\_

**FORMULAIRE 4: ÉVALUATION DE L'UTILISATION GÉNÉRIQUE DES SOINS DE SANTÉ  
GLOBAUX, STRATIFIÉE SELON L'ÂGE ET LE SEXE  
Partie A –Évaluation de l'utilisation *générique* des soins de santé**

**Instructions pour l'enquêteur**

- Compléter ce formulaire uniquement si la personne interrogée a consenti à participer (voir « Formulaire 2 — FORMULAIRE DE CONSENTEMENT ») ; la personne interrogée ainsi que définie pour cette enquête est un adulte (selon l'âge légal de majorité du pays), un membre du ménage et un décideur en ce qui concerne les soins de santé quotidiens et l'utilisation de soins de santé pour le ménage entier et ses membres ; il ne doit pas être, par exemple, un voisin ou un visiteur.
- Se référer à « Formulaire 3 — Partie A — Informations générales sur le ménage » comme référence pour obtenir le nombre total de membres du ménage ainsi que l'âge et le sexe de chaque membre du ménage.
- Recueillir les données de tous les membres du ménage que tous les membres du ménage soient présents ou non au moment de l'entretien ; ne recueillir et n'inscrire les données que des personnes présentes au moment de l'entretien fausserait les données.
- Un ménage est défini/les membres d'un ménage sont définis comme une personne ou un groupe de personnes avec ou sans lien de parenté qui vivent ensemble dans la même unité d'habitation, qui reconnaissent un adulte de sexe masculin ou féminin comme chef de ménage, qui partagent les mêmes installations domestiques, qui sont considérés comme constituant une unité, et qui subviennent à leurs besoins en termes de nourriture et des autres éléments essentiels pour vivre.
- « Site » et « sous-zone » doivent être un numéro à trois chiffres, « numéro d'habitation » un numéro à quatre chiffres, et « identifiant de l'enquêteur » un numéro à deux chiffres (utiliser les listes préparées individuellement pour chaque site pour obtenir les codes) ; saisir « date » au format JJ/MM/AAAA et « heure » au format HH:MM et entourer MATIN ou APRÈS-MIDI. «Étiquette de l'étude» doit être une combinaison d'un code «site» à trois chiffres, d'un code «sous-zone» à trois chiffres et d'un code «numéro d'habitation» à quatre chiffres; le « identifiant de l'enquêteur » doit être un numéro à trois chiffres.
- Abréviation : EDS = Établissement de santé public/privé primaire/secondaire/tertiaire.

**MEMBRES DU MÉNAGE**

**1 Indiquer le nombre total de membres du ménage de cette habitation (au jour de la visite).**

*Instructions :* Le nombre total de membres du ménage doit être indiqué à l'aide d'un numéro à 2 chiffres ; voir également « Formulaire 3 — Partie A — INFORMATIONS GÉNÉRALES SUR LE MÉNAGE ».

Nombre total de membres du ménage : \_\_\_\_

**2 Indiquer le nombre de membres FÉMININS du ménage pour chacun des groupes d'âge suivants :**

*Instructions :* Le nombre total de membres féminins du ménage par groupe d'âge doit être indiqué à l'aide d'un numéro à 2 chiffres ; voir également « Formulaire 3 — Partie A — INFORMATIONS GÉNÉRALES SUR LE MÉNAGE ».

<2 ans : \_\_\_\_ ≥2 à <5 ans : \_\_\_\_ ≥5 à <15 ans : \_\_\_\_ ≥15 ans : \_\_\_\_

**3 Indiquer le nombre de membres MASCULINS du ménage pour chacun des groupes d'âge suivants :**

*Instructions :* Le nombre total de membres masculins du ménage par groupe d'âge doit être indiqué à l'aide d'un numéro à 2 chiffres ; voir également « Formulaire 3 — Partie A — INFORMATIONS GÉNÉRALES SUR LE MÉNAGE ».

<2 ans : \_\_\_\_ ≥2 à <5 ans : \_\_\_\_ ≥5 à <15 ans : \_\_\_\_ ≥15 ans : \_\_\_\_

**COMPORTEMENT DE RECHERCHE DE SOINS DE SANTÉ**

**4 Indiquer où les membres féminins/masculins du foyer d'âges <2 ans/≥2 à <5 ans/≥5 à <15 ans/≥15 ans recherchent habituellement des soins de santé pour les signes/symptômes suivants. Merci d'attribuer une note entre 1 et 4.**

*Instructions :*

- Compléter la question 4 séparément pour les membres du ménage féminins et masculins d'âge <2 ans, ≥2 à <5 ans, ≥5 à <15 ans et ≥15 ans et entoure le sexe et le groupe d'âge pour lequel Q4 a été complétée; passer la question 4 s'il n'y a aucun membre féminin/masculin du ménage d'âge <2 ans/ ≥2 à <5 ans/ ≥5 à <15 ans/ ≥15 ans.
- Indiquer une réponse pour chaque choix de soins de santé pour chaque signe/symptôme; attribuer une note de 1 à 4 (1=1<sup>er</sup> choix; 2=2<sup>ème</sup> choix; 3=3<sup>ème</sup> choix; 4=non choisi); indiquer un code s'il y a lieu en utilisant les listes préparées (utiliser listes préparées individuellement pour chaque site pour obtenir les codes); cocher «Ne sait pas» s'il y a lieu.

| Signe/Symptôme                                                  | Choix de soins de santé  |      |                          |      |                          |           |                          |                            |                          |                       |
|-----------------------------------------------------------------|--------------------------|------|--------------------------|------|--------------------------|-----------|--------------------------|----------------------------|--------------------------|-----------------------|
|                                                                 | EDS SETA                 |      | Autre EDS                |      | Médecin                  | Pharmacie | Guérisseur traditionnel  | Nulle part Auto-médication | Nulle part Rien          | Ne sait pas           |
|                                                                 | Note                     | Code | Note                     | Code | Note                     | Note      | Note                     | Note                       | Note                     | Cocher                |
| <b>1 [A] Fièvre</b>                                             | O=1<br>O=2<br>O=3<br>O=4 |      | O=1<br>O=2<br>O=3<br>O=4 |      | O=1<br>O=2<br>O=3<br>O=4 |           | O=1<br>O=2<br>O=3<br>O=4 |                            | O=1<br>O=2<br>O=3<br>O=4 | <input type="radio"/> |
| <b>2 Fièvre &lt;3 jours (continus)</b>                          | O=1<br>O=2<br>O=3<br>O=4 |      | O=1<br>O=2<br>O=3<br>O=4 |      | O=1<br>O=2<br>O=3<br>O=4 |           | O=1<br>O=2<br>O=3<br>O=4 |                            | O=1<br>O=2<br>O=3<br>O=4 | <input type="radio"/> |
| <b>3 Fièvre ≥3 jours (continus)</b>                             | O=1<br>O=2<br>O=3<br>O=4 |      | O=1<br>O=2<br>O=3<br>O=4 |      | O=1<br>O=2<br>O=3<br>O=4 |           | O=1<br>O=2<br>O=3<br>O=4 |                            | O=1<br>O=2<br>O=3<br>O=4 | <input type="radio"/> |
| <b>4 Frissons<br/>Tremblements</b>                              | O=1<br>O=2<br>O=3<br>O=4 |      | O=1<br>O=2<br>O=3<br>O=4 |      | O=1<br>O=2<br>O=3<br>O=4 |           | O=1<br>O=2<br>O=3<br>O=4 |                            | O=1<br>O=2<br>O=3<br>O=4 | <input type="radio"/> |
| <b>5 Convulsion</b>                                             | O=1<br>O=2<br>O=3<br>O=4 |      | O=1<br>O=2<br>O=3<br>O=4 |      | O=1<br>O=2<br>O=3<br>O=4 |           | O=1<br>O=2<br>O=3<br>O=4 |                            | O=1<br>O=2<br>O=3<br>O=4 | <input type="radio"/> |
| <b>6 Perte de poids</b>                                         | O=1<br>O=2<br>O=3<br>O=4 |      | O=1<br>O=2<br>O=3<br>O=4 |      | O=1<br>O=2<br>O=3<br>O=4 |           | O=1<br>O=2<br>O=3<br>O=4 |                            | O=1<br>O=2<br>O=3<br>O=4 | <input type="radio"/> |
| <b>7 Déshydratation</b>                                         | O=1<br>O=2<br>O=3<br>O=4 |      | O=1<br>O=2<br>O=3<br>O=4 |      | O=1<br>O=2<br>O=3<br>O=4 |           | O=1<br>O=2<br>O=3<br>O=4 |                            | O=1<br>O=2<br>O=3<br>O=4 | <input type="radio"/> |
| <b>8 Malaise<br/>Faiblesse/ Fatigue</b>                         | O=1<br>O=2<br>O=3<br>O=4 |      | O=1<br>O=2<br>O=3<br>O=4 |      | O=1<br>O=2<br>O=3<br>O=4 |           | O=1<br>O=2<br>O=3<br>O=4 |                            | O=1<br>O=2<br>O=3<br>O=4 | <input type="radio"/> |
| <b>9 Douleurs<br/>(muscles/articulations /os)</b>               | O=1<br>O=2<br>O=3<br>O=4 |      | O=1<br>O=2<br>O=3<br>O=4 |      | O=1<br>O=2<br>O=3<br>O=4 |           | O=1<br>O=2<br>O=3<br>O=4 |                            | O=1<br>O=2<br>O=3<br>O=4 | <input type="radio"/> |
| <b>10 Maux de tête</b>                                          | O=1<br>O=2<br>O=3<br>O=4 |      | O=1<br>O=2<br>O=3<br>O=4 |      | O=1<br>O=2<br>O=3<br>O=4 |           | O=1<br>O=2<br>O=3<br>O=4 |                            | O=1<br>O=2<br>O=3<br>O=4 | <input type="radio"/> |
| <b>11 Vertiges/<br/>Confusion<br/>Perte de<br/>connaissance</b> | O=1<br>O=2<br>O=3<br>O=4 |      | O=1<br>O=2<br>O=3<br>O=4 |      | O=1<br>O=2<br>O=3<br>O=4 |           | O=1<br>O=2<br>O=3<br>O=4 |                            | O=1<br>O=2<br>O=3<br>O=4 | <input type="radio"/> |
| <b>12 Troubles de la<br/>pression artérielle</b>                | O=1<br>O=2<br>O=3<br>O=4 |      | O=1<br>O=2<br>O=3<br>O=4 |      | O=1<br>O=2<br>O=3<br>O=4 |           | O=1<br>O=2<br>O=3<br>O=4 |                            | O=1<br>O=2<br>O=3<br>O=4 | <input type="radio"/> |
| <b>13 Troubles<br/>cardiaques</b>                               | O=1<br>O=2<br>O=3<br>O=4 |      | O=1<br>O=2<br>O=3<br>O=4 |      | O=1<br>O=2<br>O=3<br>O=4 |           | O=1<br>O=2<br>O=3<br>O=4 |                            | O=1<br>O=2<br>O=3<br>O=4 | <input type="radio"/> |

| Signe/Symptôme                                                                                  | Choix de soins de santé |      |           |      |         |           |                         |                            |                 |             |
|-------------------------------------------------------------------------------------------------|-------------------------|------|-----------|------|---------|-----------|-------------------------|----------------------------|-----------------|-------------|
|                                                                                                 | EDS SETA                |      | Autre EDS |      | Médecin | Pharmacie | Guérisseur traditionnel | Nulle part Auto-médication | Nulle part Rien | Ne sait pas |
|                                                                                                 | Note                    | Code | Note      | Code | Note    | Note      | Note                    | Note                       | Note            | Cocher      |
| <b>14</b> Nausée<br>Vomissements                                                                | O=1                     |      | O=1       |      | O=1     | O=1       | O=1                     | O=1                        | O=1             | ○           |
|                                                                                                 | O=2                     |      | O=2       |      | O=2     | O=2       | O=2                     | O=2                        | O=2             |             |
|                                                                                                 | O=3                     |      | O=3       |      | O=3     | O=3       | O=3                     | O=3                        | O=3             |             |
|                                                                                                 | O=4                     |      | O=4       |      | O=4     | O=4       | O=4                     | O=4                        | O=4             |             |
| <b>15</b> Diarrhée<br>(liquide/sanglante/<br>mucopurulente)                                     | O=1                     |      | O=1       |      | O=1     | O=1       | O=1                     | O=1                        | O=1             | ○           |
|                                                                                                 | O=2                     |      | O=2       |      | O=2     | O=2       | O=2                     | O=2                        | O=2             |             |
|                                                                                                 | O=3                     |      | O=3       |      | O=3     | O=3       | O=3                     | O=3                        | O=3             |             |
|                                                                                                 | O=4                     |      | O=4       |      | O=4     | O=4       | O=4                     | O=4                        | O=4             |             |
| <b>16</b> Douleur<br>abdominale<br>Douleur intestinale                                          | O=1                     |      | O=1       |      | O=1     | O=1       | O=1                     | O=1                        | O=1             | ○           |
|                                                                                                 | O=2                     |      | O=2       |      | O=2     | O=2       | O=2                     | O=2                        | O=2             |             |
|                                                                                                 | O=3                     |      | O=3       |      | O=3     | O=3       | O=3                     | O=3                        | O=3             |             |
|                                                                                                 | O=4                     |      | O=4       |      | O=4     | O=4       | O=4                     | O=4                        | O=4             |             |
| <b>17</b> Perte de sang/<br>Hémorragie<br>(interne)                                             | O=1                     |      | O=1       |      | O=1     | O=1       | O=1                     | O=1                        | O=1             | ○           |
|                                                                                                 | O=2                     |      | O=2       |      | O=2     | O=2       | O=2                     | O=2                        | O=2             |             |
|                                                                                                 | O=3                     |      | O=3       |      | O=3     | O=3       | O=3                     | O=3                        | O=3             |             |
|                                                                                                 | O=4                     |      | O=4       |      | O=4     | O=4       | O=4                     | O=4                        | O=4             |             |
| <b>18</b> Perte de sang/<br>Hémorragie<br>(externe)                                             | O=1                     |      | O=1       |      | O=1     | O=1       | O=1                     | O=1                        | O=1             | ○           |
|                                                                                                 | O=2                     |      | O=2       |      | O=2     | O=2       | O=2                     | O=2                        | O=2             |             |
|                                                                                                 | O=3                     |      | O=3       |      | O=3     | O=3       | O=3                     | O=3                        | O=3             |             |
|                                                                                                 | O=4                     |      | O=4       |      | O=4     | O=4       | O=4                     | O=4                        | O=4             |             |
| <b>19</b> Éternuements<br>Nez qui coule                                                         | O=1                     |      | O=1       |      | O=1     | O=1       | O=1                     | O=1                        | O=1             | ○           |
|                                                                                                 | O=2                     |      | O=2       |      | O=2     | O=2       | O=2                     | O=2                        | O=2             |             |
|                                                                                                 | O=3                     |      | O=3       |      | O=3     | O=3       | O=3                     | O=3                        | O=3             |             |
|                                                                                                 | O=4                     |      | O=4       |      | O=4     | O=4       | O=4                     | O=4                        | O=4             |             |
| <b>20</b> Toux                                                                                  | O=1                     |      | O=1       |      | O=1     | O=1       | O=1                     | O=1                        | O=1             | ○           |
|                                                                                                 | O=2                     |      | O=2       |      | O=2     | O=2       | O=2                     | O=2                        | O=2             |             |
|                                                                                                 | O=3                     |      | O=3       |      | O=3     | O=3       | O=3                     | O=3                        | O=3             |             |
|                                                                                                 | O=4                     |      | O=4       |      | O=4     | O=4       | O=4                     | O=4                        | O=4             |             |
| <b>21</b> Respiration<br>rapide/<br>essoufflement                                               | O=1                     |      | O=1       |      | O=1     | O=1       | O=1                     | O=1                        | O=1             | ○           |
|                                                                                                 | O=2                     |      | O=2       |      | O=2     | O=2       | O=2                     | O=2                        | O=2             |             |
|                                                                                                 | O=3                     |      | O=3       |      | O=3     | O=3       | O=3                     | O=3                        | O=3             |             |
|                                                                                                 | O=4                     |      | O=4       |      | O=4     | O=4       | O=4                     | O=4                        | O=4             |             |
| <b>22</b> Difficultés<br>respiratoires<br>graves                                                | O=1                     |      | O=1       |      | O=1     | O=1       | O=1                     | O=1                        | O=1             | ○           |
|                                                                                                 | O=2                     |      | O=2       |      | O=2     | O=2       | O=2                     | O=2                        | O=2             |             |
|                                                                                                 | O=3                     |      | O=3       |      | O=3     | O=3       | O=3                     | O=3                        | O=3             |             |
|                                                                                                 | O=4                     |      | O=4       |      | O=4     | O=4       | O=4                     | O=4                        | O=4             |             |
| <b>23</b> Inflammation<br>de la peau<br>(éruptions cutanées/<br>rougeurs/pus/<br>démangeaisons) | O=1                     |      | O=1       |      | O=1     | O=1       | O=1                     | O=1                        | O=1             | ○           |
|                                                                                                 | O=2                     |      | O=2       |      | O=2     | O=2       | O=2                     | O=2                        | O=2             |             |
|                                                                                                 | O=3                     |      | O=3       |      | O=3     | O=3       | O=3                     | O=3                        | O=3             |             |
|                                                                                                 | O=4                     |      | O=4       |      | O=4     | O=4       | O=4                     | O=4                        | O=4             |             |
| <b>24</b> Gonflement/<br>Œdème                                                                  | O=1                     |      | O=1       |      | O=1     | O=1       | O=1                     | O=1                        | O=1             | ○           |
|                                                                                                 | O=2                     |      | O=2       |      | O=2     | O=2       | O=2                     | O=2                        | O=2             |             |
|                                                                                                 | O=3                     |      | O=3       |      | O=3     | O=3       | O=3                     | O=3                        | O=3             |             |
|                                                                                                 | O=4                     |      | O=4       |      | O=4     | O=4       | O=4                     | O=4                        | O=4             |             |
| <b>25</b> Jaunisse                                                                              | O=1                     |      | O=1       |      | O=1     | O=1       | O=1                     | O=1                        | O=1             | ○           |
|                                                                                                 | O=2                     |      | O=2       |      | O=2     | O=2       | O=2                     | O=2                        | O=2             |             |
|                                                                                                 | O=3                     |      | O=3       |      | O=3     | O=3       | O=3                     | O=3                        | O=3             |             |
|                                                                                                 | O=4                     |      | O=4       |      | O=4     | O=4       | O=4                     | O=4                        | O=4             |             |

Site \_\_\_\_ Sous-zone \_\_\_\_ Numéro d'habitation \_\_\_\_ Identifiant de l'enquêteur \_\_\_\_

## FORMULAIRE 4: ÉVALUATION DE L'UTILISATION GÉNÉRIQUE DES SOINS DE SANTÉ GLOBAUX, STRATIFIÉE SELON L'ÂGE ET LE SEXE

### Partie B – Facteurs associés aux soins de santé/Vaccination/Percéption de la maladie

#### DÉPLACEMENT À L'ÉTABLISSEMENT DE SANTÉ

- 1 Au cas où un établissement de santé (EDS) a été noté comme 1<sup>er</sup> choix de soins à la question 4A (fièvre), quel est habituellement le moyen de transport principal, le temps de trajet (selon le moyen de transport), le coût du trajet (selon le moyen de transport) et la distance du trajet (selon le moyen de transport) pour s'y rendre ?**

*Instructions :* Indiquer uniquement un code par catégorie, sexe ainsi que groupe d'âge. Passer cette question s'il n'y a pas de membre féminin/masculin d'âge <2 ans/≥2 à <5 ans/≥5 à <15 ans/≥15 ans dans ce ménage (voir également questions 2 et 3 de ce formulaire Partie A). Passer cette question si aucun EDS n'a été noté comme 1<sup>er</sup> choix de soins à la question 4A pour les membres masculins/féminins d'âge <2 ans/≥2 à <5 ans/≥5 à <15 ans/≥15 ans. Indiquer le temps de trajet en minute(s) [min]/ heure(s) [h], le coût total en USD, y compris les cadeaux éventuels, les aides financières et les dons, et la distance totale en mètre(s) [m]/kilomètre(s) [km].

| Membre féminin                                        |             |                      |           | Membre masculin          |             |                     |           |
|-------------------------------------------------------|-------------|----------------------|-----------|--------------------------|-------------|---------------------|-----------|
| <2 ans                                                | ≥2 à <5 ans | ≥5 à <15 ans         | ≥15 ans   | <2 ans                   | ≥2 à <5 ans | ≥5 à <15 ans        | ≥15 ans   |
| <b>1.1 Moyen de transport</b>                         |             |                      |           |                          |             |                     |           |
| Code ____                                             | Code ____   | Code ____            | Code ____ | Code ____                | Code ____   | Code ____           | Code ____ |
| [1] Private transportation (i.e. motorbike, car, bus) |             | [3] Walking          |           | [5] Other, specify _____ |             |                     |           |
| [2] Public transportation (i.e. motorbike, car, bus)  |             | [4] Bicycle          |           | [99] Don't know          |             | [98] No response    |           |
| <b>1.2 Temps de trajet</b>                            |             |                      |           |                          |             |                     |           |
| Code ____                                             | Code ____   | Code ____            | Code ____ | Code ____                | Code ____   | Code ____           | Code ____ |
| [1] <30 min                                           |             | [3] ≥1.0 à <2.0 h    |           | [5] ≥3.0 à <4.0 h        |             | [99] Ne sait pas    |           |
| [2] ≥30 à <60 min                                     |             | [4] ≥2.0 à <3.0 h    |           | [6] ≥4.0h                |             | [98] Pas de réponse |           |
| <b>1.3 Coût du transport</b>                          |             |                      |           |                          |             |                     |           |
| Code ____                                             | Code ____   | Code ____            | Code ____ | Code ____                | Code ____   | Code ____           | Code ____ |
| [1] <1.0 USD                                          |             | [3] ≥3.0 à <5.0 USD  |           | [5] ≥10.0 USD            |             | [99] Ne sait pas    |           |
| [2] ≥1.0 à <3.0 USD                                   |             | [4] ≥5.0 à <10.0 USD |           | [98] Pas de réponse      |             |                     |           |
| <b>1.4 Distance du trajet</b>                         |             |                      |           |                          |             |                     |           |
| Code ____                                             | Code ____   | Code ____            | Code ____ | Code ____                | Code ____   | Code ____           | Code ____ |
| [1] <500 m                                            |             | [3] ≥1.0 à <2.0 km   |           | [5] ≥3.0 à <4.0 km       |             | [99] Ne sait pas    |           |
| [2] ≥500 m à <1.0 km                                  |             | [4] ≥2.0 à <3.0 km   |           | [6] ≥4.0 km              |             | [98] Pas de réponse |           |

#### **ASSURANCE**

- 2 Pour quels membres de ce ménage l'assurance couvre-t-elle les dépenses de santé ?**

*Instructions :* Indiquer un code par catégorie. Passer cette question s'il n'y a aucun membre d'âge <2 ans/≥2 à <5 ans/≥5 à <15 ans/≥15 ans dans ce ménage (voir questions 2 et 3 de ce formulaire partie A).

| <2 ans     | ≥2 à <5 ans | ≥5 à <15 ans     | ≥15 ans             |
|------------|-------------|------------------|---------------------|
| Code _____ | Code _____  | Code _____       | Code _____          |
| [1] Oui    | [2] Non     | [99] Ne sait pas | [98] Pas de réponse |

- 3 Quels types de dépenses de santé sont habituellement couverts par l'assurance pour les membres de ce ménage ?**

*Instructions :* Indiquer uniquement un code par catégorie et par groupe d'âge. Passer cette question s'il n'y a aucun membre d'âge <2 ans/≥2 à <5 ans/≥5 à <15 ans/≥15 ans dans ce ménage (voir également les questions 2 et 3 de ce formulaire partie

A). Passer cette question s'il n'y a aucune assurance qui couvre les dépenses de santé des membres d'âge <2 ans/≥2 à <5 ans/≥5 à <15 ans/≥15 ans.

|                                                                                           | <2 ans     | ≥2 à <5 ans | ≥5 à <15 ans     | ≥15 ans             |
|-------------------------------------------------------------------------------------------|------------|-------------|------------------|---------------------|
|                                                                                           | [1] Oui    | [2] Non     | [99] Ne sait pas | [98] Pas de réponse |
| <b>1</b> Inscription                                                                      | Code _____ | Code _____  | Code _____       | Code _____          |
| <b>2</b> Consultation/Visite chez le médecin                                              | Code _____ | Code _____  | Code _____       | Code _____          |
| <b>3</b> Examen physique - général                                                        | Code _____ | Code _____  | Code _____       | Code _____          |
| <b>4</b> Examen physique – spécifique, préciser _____                                     | Code _____ | Code _____  | Code _____       | Code _____          |
| <b>5</b> Diagnostics - diagnostics généraux de laboratoire                                | Code _____ | Code _____  | Code _____       | Code _____          |
| <b>6</b> Diagnostics – diagnostics spécifiques de laboratoire, préciser _____             | Code _____ | Code _____  | Code _____       | Code _____          |
| <b>7</b> Diagnostics Imagerie générale                                                    | Code _____ | Code _____  | Code _____       | Code _____          |
| <b>8</b> Diagnostics Imagerie spécifique, préciser _____                                  | Code _____ | Code _____  | Code _____       | Code _____          |
| <b>9</b> Diagnostics Autre, préciser _____                                                | Code _____ | Code _____  | Code _____       | Code _____          |
| <b>10</b> Traitement Médication générale                                                  | Code _____ | Code _____  | Code _____       | Code _____          |
| <b>11</b> Traitement Médication spécifique, préciser _____                                | Code _____ | Code _____  | Code _____       | Code _____          |
| <b>12</b> Traitement Autre médication, préciser _____                                     | Code _____ | Code _____  | Code _____       | Code _____          |
| <b>13</b> Traitement Interventions (autres que chirurgie), préciser _____                 | Code _____ | Code _____  | Code _____       | Code _____          |
| <b>14</b> Traitement Chirurgie                                                            | Code _____ | Code _____  | Code _____       | Code _____          |
| <b>15</b> Hospitalisation <7 jours                                                        | Code _____ | Code _____  | Code _____       | Code _____          |
| <b>16</b> Hospitalisation ≥7 jours                                                        | Code _____ | Code _____  | Code _____       | Code _____          |
| <b>17</b> Services d'urgence                                                              | Code _____ | Code _____  | Code _____       | Code _____          |
| <b>18</b> Soins prénatals                                                                 | Code _____ | Code _____  | Code _____       | Code _____          |
| <b>19</b> Soins postnatals                                                                | Code _____ | Code _____  | Code _____       | Code _____          |
| <b>20</b> Médecine préventive                                                             | Code _____ | Code _____  | Code _____       | Code _____          |
| <b>21</b> Vaccination                                                                     | Code _____ | Code _____  | Code _____       | Code _____          |
| <b>22</b> Soins à domicile (personnes âgées, handicapés, malades chroniques/à long terme) | Code _____ | Code _____  | Code _____       | Code _____          |
| <b>23</b> Thérapie de soutien (physiothérapie, ergothérapie, réhabilitation)              | Code _____ | Code _____  | Code _____       | Code _____          |

**ETHNOGRAPHIE****4 À quelle religion/groupe ethnique/tribu appartient les membres de ce ménage ?**

*Instructions :* Donner une réponse par groupe d'âge uniquement. Passer cette question s'il n'y a aucun membre d'âge >2 ans/≥2 à <5 ans/≥5 à <15 ans/≥15 ans dans ce ménage (voir également questions 2 et 3 de ce formulaire Partie A).

|                                | <2 ans                                                                          | ≥2 to <5 ans                                                                    | ≥5 to <15 ans                                                                   | ≥15 ans                                                                         |
|--------------------------------|---------------------------------------------------------------------------------|---------------------------------------------------------------------------------|---------------------------------------------------------------------------------|---------------------------------------------------------------------------------|
| Religion/Groupe ethnique/Tribu | _____                                                                           | _____                                                                           | _____                                                                           | _____                                                                           |
|                                | <input type="radio"/> 99=Ne sait pas<br><input type="radio"/> 98=Pas de réponse | <input type="radio"/> 99=Ne sait pas<br><input type="radio"/> 98=Pas de réponse | <input type="radio"/> 99=Ne sait pas<br><input type="radio"/> 98=Pas de réponse | <input type="radio"/> 99=Ne sait pas<br><input type="radio"/> 98=Pas de réponse |

**5 La religion/le groupe ethnique/la tribu comme indiqué à la question 4 influence-t-elle/il les différents aspects de l'utilisation des soins de santé pour les membres de ce ménage ?**

*Instructions :* Indiquer un code par catégorie et groupe d'âge uniquement. Passer cette question s'il y a un membre d'âge >2 ans/≥2 à <5 ans/≥5 à <15 ans/≥15 ans dans ce ménage (voir également questions 2 et 3 de ce formulaire Partie A).

|                                                                                                          | <2 ans     | ≥2 à <5 ans | ≥5 to <15 ans    | ≥15 ans          |
|----------------------------------------------------------------------------------------------------------|------------|-------------|------------------|------------------|
|                                                                                                          | [1] Oui    | [2] Non     | [99] Ne sait pas | [98] pas réponse |
| <b>1</b> Visite dans un établissement de santé (hôpital, centre de soins, poste de santé)                | Code _____ | Code _____  | Code _____       | Code _____       |
| <b>2</b> Visite chez un médecin                                                                          | Code _____ | Code _____  | Code _____       | Code _____       |
| <b>3</b> Visite dans une pharmacie                                                                       | Code _____ | Code _____  | Code _____       | Code _____       |
| <b>4</b> Visite chez un guérisseur traditionnel                                                          | Code _____ | Code _____  | Code _____       | Code _____       |
| <b>5</b> Décision d'automédication                                                                       | Code _____ | Code _____  | Code _____       | Code _____       |
| <b>6</b> Décision de non traitement                                                                      | Code _____ | Code _____  | Code _____       | Code _____       |
| <b>7</b> Examen physique - général                                                                       | Code _____ | Code _____  | Code _____       | Code _____       |
| <b>8</b> Examen physique – spécifique, préciser _____                                                    | Code _____ | Code _____  | Code _____       | Code _____       |
| <b>9</b> Prélèvements d'échantillons (sang, urine, selles, frottis, écouvillons, liquide cérebro-spinal) | Code _____ | Code _____  | Code _____       | Code _____       |
| <b>10</b> Diagnostics - diagnostics généraux de laboratoire                                              | Code _____ | Code _____  | Code _____       | Code _____       |
| <b>11</b> Diagnostics – diagnostics spécifiques de laboratoire, préciser _____                           | Code _____ | Code _____  | Code _____       | Code _____       |
| <b>12</b> Diagnostics Imagerie générale                                                                  | Code _____ | Code _____  | Code _____       | Code _____       |
| <b>13</b> Diagnostics Imagerie spécifique, préciser _____                                                | Code _____ | Code _____  | Code _____       | Code _____       |
| <b>14</b> Diagnostics Autre, préciser _____                                                              | Code _____ | Code _____  | Code _____       | Code _____       |
| <b>15</b> Traitement Médication générale                                                                 | Code _____ | Code _____  | Code _____       | Code _____       |
| <b>16</b> Traitement Médication spécifique, préciser _____                                               | Code _____ | Code _____  | Code _____       | Code _____       |
| <b>17</b> Traitement Autre médication, préciser _____                                                    | Code _____ | Code _____  | Code _____       | Code _____       |

|                                                                                           |            |            |            |            |
|-------------------------------------------------------------------------------------------|------------|------------|------------|------------|
| <b>18</b> Traitement Interventions (autres que chirurgie), préciser _____                 | Code _____ | Code _____ | Code _____ | Code _____ |
| <b>19</b> Traitement Chirurgie                                                            | Code _____ | Code _____ | Code _____ | Code _____ |
| <b>20</b> Hospitalisation <7 jours                                                        | Code _____ | Code _____ | Code _____ | Code _____ |
| <b>21</b> Hospitalisation ≥7 jours                                                        | Code _____ | Code _____ | Code _____ | Code _____ |
| <b>22</b> Services d'urgence                                                              | Code _____ | Code _____ | Code _____ | Code _____ |
| <b>23</b> Soins prénatals                                                                 | Code _____ | Code _____ | Code _____ | Code _____ |
| <b>24</b> Soins postnatals                                                                | Code _____ | Code _____ | Code _____ | Code _____ |
| <b>25</b> Médecine préventive                                                             | Code _____ | Code _____ | Code _____ | Code _____ |
| <b>26</b> Vaccination                                                                     | Code _____ | Code _____ | Code _____ | Code _____ |
| <b>27</b> Soins à domicile (personnes âgées, handicapés, malades chroniques/à long terme) | Code _____ | Code _____ | Code _____ | Code _____ |
| <b>28</b> Thérapie de soutien (physiothérapie, ergothérapie, réhabilitation)              | Code _____ | Code _____ | Code _____ | Code _____ |

### **VACCINATION**

**6 Comment les enfants de ce ménage ont-ils été nourris pendant les 6 premiers mois de leur vie ?**

*Instructions :* Passer cette question s'il n'y a pas d'enfants de sexe masculin ou féminin dans ce ménage (voir également questions 2 et 3 de ce formulaire partie A).

- 1=Lait maternisé exclusivement  
 2=Lait maternisé et autres aliments, préciser \_\_\_\_\_  
 3=Allaitement et autres aliments, préciser \_\_\_\_\_  
 4=Lait maternisé et allaitement
- 5=Allaitement exclusivement  
 6=Autre, préciser \_\_\_\_\_  
 99=Ne sait pas  
 98=Pas de réponse

**7 Quelle source d'approvisionnement en eau était-elle habituellement utilisée pour préparer le lait maternisé ou le lait maternisé et d'autres aliments comme indiqué à la question 6 pour les enfants de ce ménage ?**

*Instructions :* Passer cette question s'il n'y a pas d'enfants dans ce ménage (voir également les questions 2 et 3 de ce formulaire Partie A).

- 1=Eau du robinet (à l'intérieur de l'habitation, privé)  
 2=Eau du robinet (à l'extérieur de l'habitation, arrière- cour/cour, privé)  
 3=Eau du robinet (à l'extérieur de l'habitation, public, partagé)  
 4=Borne-fontaine/Eau courante (à l'intérieur de l'habitation, privé)  
 5=Borne-fontaine/Eau courante (à l'extérieur de l'habitation, arrière- cour/cour, privé)  
 6=Borne-fontaine/Eau courante (à l'extérieur de l'habitation, public, partagé)  
 7=Camion-citerne (public, partagé)  
 8=Eau en bouteille  
 9=Eaux de surface (lac, étang, rivière, ruisseau)  
 10=Eaux de surface (canal, canal d'irrigation)  
 11=Eau de source  
 12=Eau de pluie  
 13=Puits/Puits de forage (ouvert/non couvert/non protégé)  
 14=Puits/Puits de forage (couvert/protégé)  
 15=NO FORMULA/OTHER FEEDS PREPARED  
 16=Autre, préciser \_\_\_\_\_
- 99=Ne sait pas       98=Pas de réponse

**8 Est-ce que les enfants de ce ménage ont été vaccinés depuis leur naissance, y compris les vaccins de naissance ?**

*Instructions* : Indiquer un code par catégorie et par enfant uniquement. Passer cette question s'il n'y a aucun enfant dans ce ménage (voir également les questions 2 et 3 de ce formulaire PartieA). Se référer à la question 9 « Formulaire 3 Partie A – Données démographiques/Informations générales sur le ménage » et indiquer les initiales/identificateur du/des membre(s).

| Enfant 1                                                                                                                                                           | Enfant 2                                     | Enfant 3                              | Enfant 4                      |
|--------------------------------------------------------------------------------------------------------------------------------------------------------------------|----------------------------------------------|---------------------------------------|-------------------------------|
| Initiales/Identifiant : _____                                                                                                                                      | Initiales/Identifiant : _____                | Initiales/Identifiant : _____         | Initiales/Identifiant : _____ |
| [1] OUI, vacciné                                                                                                                                                   | [5] Non, manque de vaccins                   | [9] Non, EDS débordé                  |                               |
| [2] Non, parent/tuteur débordé                                                                                                                                     | [6] Non, enfant trop jeune/vieux             | [10] Non, enfant malade               |                               |
| [3] Non, parent/tuteur a décidé que pas nécessaire                                                                                                                 | [7] Non, parent/tuteur a refusé/trop inquiet | [11] Non, pas de carte de vaccination |                               |
| [4] Non, ne sait pas où aller                                                                                                                                      | [8] Non, Autre, préciser _____               | [99] Don't know                       | [98] No response              |
| <b>8.1 Diphtérie et tétanos et coqueluche et <i>Haemophilus influenza</i> et vaccin contre l'hépatite B / DTwPHibHepB</b> (par exemple 6/8, 10/12, 14/16 semaines) |                                              |                                       |                               |
| Code _____                                                                                                                                                         | Code _____                                   | Code _____                            | Code _____                    |
| <b>8.2 Anatoxine tétanique (TT)</b> (par exemple, 1er contact, grossesse, 1, 6, 12/24 mois)                                                                        |                                              |                                       |                               |
| Code _____                                                                                                                                                         | Code _____                                   | Code _____                            | Code _____                    |
| <b>8.3 Anatoxine tétanique et diphtérique (TD)</b> (par exemple, grossesse avec un premier contact, 1, 6, 12 mois)                                                 |                                              |                                       |                               |
| Code _____                                                                                                                                                         | Code _____                                   | Code _____                            | Code _____                    |
| <b>8.4 Tuberculose / BCG</b> (à la naissance)                                                                                                                      |                                              |                                       |                               |
| Code _____                                                                                                                                                         | Code _____                                   | Code _____                            | Code _____                    |
| <b>8.5 Rotavirus / RV</b> (par exemple 6/8, 10/12, 16 semaines)                                                                                                    |                                              |                                       |                               |
| Code _____                                                                                                                                                         | Code _____                                   | Code _____                            | Code _____                    |
| <b>8.6 Rougeole / rougeole et rubéole (MR)</b> (par exemple 9, 15/18 mois)                                                                                         |                                              |                                       |                               |
| Code _____                                                                                                                                                         | Code _____                                   | Code _____                            | Code _____                    |
| <b>8.7 Polio / VPO</b> (par exemple naissance, 6/8, 10/12, 14/16 semaines)                                                                                         |                                              |                                       |                               |
| Code _____                                                                                                                                                         | Code _____                                   | Code _____                            | Code _____                    |
| <b>8.8 Pneumocoque / PCV</b> (par exemple 6/8, 10/12, 14/16 semaines)                                                                                              |                                              |                                       |                               |
| Code _____                                                                                                                                                         | Code _____                                   | Code _____                            | Code _____                    |
| <b>8.9 Fièvre jaune (YF)</b> (par exemple 9 mois)                                                                                                                  |                                              |                                       |                               |
| Code _____                                                                                                                                                         | Code _____                                   | Code _____                            | Code _____                    |
| <b>8.10 Autres vaccins</b>                                                                                                                                         |                                              |                                       |                               |
| Préciser, _____                                                                                                                                                    | Préciser, _____                              | Préciser, _____                       | Préciser, _____               |
| Préciser, _____                                                                                                                                                    | Préciser, _____                              | Préciser, _____                       | Préciser, _____               |
| Préciser, _____                                                                                                                                                    | Préciser, _____                              | Préciser, _____                       | Préciser, _____               |
| Préciser, _____                                                                                                                                                    | Préciser, _____                              | Préciser, _____                       | Préciser, _____               |



**PERCEPTION DE LA MALADIE**

**9 Connaissance, perception, causes et prévention des maladies infectieuses communes**

| Maladie                   | <b>9.1 Maladie connue des membres du ménage ?</b><br>[1] Oui<br>[2] Non<br>[99] Ne sait pas<br>[98] Pas de réponse | <b>9.2 Perception de la maladie par les membres du ménage</b><br><i>Instruction</i> : Décrire brièvement si elle est connue. | <b>9.3 Causes de la maladie connue des membres du ménage ?</b><br><i>Instructions</i> : Indiquer tous les codes (liste A) qui s'appliquent; plus d'une réponse est possible | <b>9.4 Mesures pour prévenir la maladie connues des membres du ménage ?</b><br><i>Instructions</i> : Indiquer tous les codes (liste B) qui s'appliquent ; plus d'une réponse est possible. | <b>9.5 Mesures pour prévenir la maladie utilisées par les membres du foyer ?</b><br><i>Instructions</i> : Indiquer tous les codes (liste B) qui s'appliquent ; il peut y avoir plus d'une réponse. |
|---------------------------|--------------------------------------------------------------------------------------------------------------------|------------------------------------------------------------------------------------------------------------------------------|-----------------------------------------------------------------------------------------------------------------------------------------------------------------------------|--------------------------------------------------------------------------------------------------------------------------------------------------------------------------------------------|----------------------------------------------------------------------------------------------------------------------------------------------------------------------------------------------------|
| <b>A.</b> Fièvre typhoïde | Code _____                                                                                                         |                                                                                                                              | Code _____                                                                                                                                                                  | Code _____                                                                                                                                                                                 | Code _____                                                                                                                                                                                         |
| <b>B.</b> Choléra         | Code _____                                                                                                         |                                                                                                                              | Code _____                                                                                                                                                                  | Code _____                                                                                                                                                                                 | Code _____                                                                                                                                                                                         |
| <b>C.</b> Paludisme       | Code _____                                                                                                         |                                                                                                                              | Code _____                                                                                                                                                                  | Code _____                                                                                                                                                                                 | Code _____                                                                                                                                                                                         |
| <b>D.</b> Grippe          | Code _____                                                                                                         |                                                                                                                              | Code _____                                                                                                                                                                  | Code _____                                                                                                                                                                                 | Code _____                                                                                                                                                                                         |
| <b>E.</b> Méningite       | Code _____                                                                                                         |                                                                                                                              | Code _____                                                                                                                                                                  | Code _____                                                                                                                                                                                 | Code _____                                                                                                                                                                                         |
| <b>F.</b> Hépatite E      | Code _____                                                                                                         |                                                                                                                              | Code _____                                                                                                                                                                  | Code _____                                                                                                                                                                                 | Code _____                                                                                                                                                                                         |
| <b>G.</b> Tuberculose     | Code _____                                                                                                         |                                                                                                                              | Code _____                                                                                                                                                                  | Code _____                                                                                                                                                                                 | Code _____                                                                                                                                                                                         |
| <b>H.</b> VIH/SIDA        | Code _____                                                                                                         |                                                                                                                              | Code _____                                                                                                                                                                  | Code _____                                                                                                                                                                                 | Code _____                                                                                                                                                                                         |

|                                                    |                                                                      |
|----------------------------------------------------|----------------------------------------------------------------------|
| Liste A: Causes possibles                          | Liste B: Mesures préventives possibles                               |
| [1] Consommation d'alcool<br>[2] Temps/sorcellerie | [1] Pas de consommation d'alcool<br>[2] Dormir sous une moustiquaire |

|                                                                                                                                                   |                                                                                                                                                               |
|---------------------------------------------------------------------------------------------------------------------------------------------------|---------------------------------------------------------------------------------------------------------------------------------------------------------------|
| [3] Piqûre de moustique/d'insecte                                                                                                                 | [3] Utiliser des sprays insecticides/anti-moustiques                                                                                                          |
| [4] Morsure de chien                                                                                                                              | [4] Maintenir la maison et ses environs immédiats propres                                                                                                     |
| [5] Boire de l'eau non traitée de surface/de source (lac, étang, rivière, ruisseau, canal, canal d'irrigation)                                    | [5] Avoir une pratique correcte de l'élimination des déchets humains et domestiques                                                                           |
| [6] Contact physique étroit/baiser/embrassade                                                                                                     | [6] Éviter le contact rapproché avec des chiens                                                                                                               |
| [7] Manger des produits alimentaires crus comme des légumes/de la salade, des fruits, des produits laitiers, des œufs, de la viande ou du poisson | [7] Traiter l'eau (faire bouillir, filtration, désinfection solaire, sédimentation, chloration)                                                               |
| [8] Ne pas se laver les mains correctement en préparant la nourriture/les repas                                                                   | [8] Ne pas cuisiner/préparer la nourriture/les repas avec de l'eau non traitée                                                                                |
| [9] Ne pas se laver les mains correctement avant/après être allé aux toilettes                                                                    | [9] Ne pas laver les produits alimentaires à consommer crus avec de l'eau non traitée                                                                         |
| [10] Contact avec du sang humain (injection, transfusion, chirurgie)                                                                              | [10] Faire bouillir/chauffer à nouveau les restes/les aliments/repas préparés avant de les consommer                                                          |
| [11] Consommation de sang animal cru                                                                                                              | [11] Ne pas manger des produits alimentaires crus comme légumes/salade, fruits, produits laitiers, œufs, viande ou poisson                                    |
| [12] Autre, préciser _____                                                                                                                        | [12] Couvrir les produits alimentaires/repas                                                                                                                  |
| [99] Ne sait pas                                                                                                                                  | [13] Protéger les produits alimentaires/repas contre les mouches                                                                                              |
| [98] Pas de réponse                                                                                                                               | [14] Éviter la nourriture/les boissons des vendeurs de rue                                                                                                    |
|                                                                                                                                                   | [15] Éviter le contact rapproché avec les personnes malades                                                                                                   |
|                                                                                                                                                   | [16] Pas de contact physique étroit/baisers/embrassades                                                                                                       |
|                                                                                                                                                   | [17] Se couvrir le nez/la bouche en éternuant/toussant                                                                                                        |
|                                                                                                                                                   | [18] Pas de contact/consommation de sang humain/animal                                                                                                        |
|                                                                                                                                                   | [19] Avoir une bonne hygiène des mains en préparant la nourriture/les repas (se laver les mains avec du savon et de l'eau, se laver les mains par frottement) |
|                                                                                                                                                   | [20] Avoir une bonne hygiène des mains avant/après être allé aux toilettes (se laver les mains avec du savon et de l'eau, se laver les mains par frottement)  |
|                                                                                                                                                   | [21] Autre, préciser _____                                                                                                                                    |
|                                                                                                                                                   | [99] Ne sait pas                                                                                                                                              |
|                                                                                                                                                   | [98] Pas de réponse                                                                                                                                           |

**10 Pour quels membres de ce ménage les mesures préventives listées à la questions 9.5 contre la fièvre typhoïde sont-elles utilisées ?**

*Instructions* : Cocher plusieurs cases si nécessaire ; il peut y avoir plus d'une réponse.

- 1=<2 ans                       3= $\geq$ 5 à <15 ans                       5=PAS UTILISÉ                       99=Ne sait pas  
 2= $\geq$ 2 à < 5 ans                       4= $\geq$ 15 ans                       98=Pas de réponse

**11 Nommer les membres du ménage pour lesquels une fièvre typhoïde a été diagnostiquée dans les 3 derniers mois. Quels éléments de diagnostic ont été utilisés pour confirmer la fièvre typhoïde?**

*Instructions* : Indiquer plusieurs codes si nécessaire pour chaque membre du ménage ; il peut y avoir plus d'une réponse.

| Membre 1<br>Initiales/Identifiant: __ | Membre 2<br>Initiales/Identifiant: __ | Membre 3<br>Initiales/Identifiant: __                         | Membre 4<br>Initiales/Identifiant: __ |
|---------------------------------------|---------------------------------------|---------------------------------------------------------------|---------------------------------------|
| [1] Hémostoculture                    | [3] Test sanguin/de Widal             | [5] Pas applicable (pas diagnostiqué avec la fièvre typhoïde) |                                       |
| [2] Coproculture                      | [4] Autre test, préciser _____        | [99] Ne sait pas                                              | [98] Pas de réponse                   |
| Code _____                            | Code _____                            | Code _____                                                    | Code _____                            |

**12 (Où les membres de ce ménage indiqués à la question 11 ont-ils été diagnostiqués pour la fièvre typhoïde?) Où les membres de ce ménage ont-ils recherché des soins de santé?**

*Instructions* : Indiquer un code par membre du ménage uniquement.

| Membre 1<br>Initiales/Identifiant: __      | Membre 2<br>Initiales/Identifiant: __     | Membre 3<br>Initiales/Identifiant: __ | Membre 4<br>Initiales/Identifiant: __ |
|--------------------------------------------|-------------------------------------------|---------------------------------------|---------------------------------------|
| [1] Établissement de santé, préciser _____ | [6] Nulle part, pas de recherche de soins |                                       |                                       |
| [2] Médecin                                | [7] Autre, préciser _____                 |                                       |                                       |
| [3] Nulle part, automédication             | [8] Pas applicable                        |                                       |                                       |
| [4] Guérisseur traditionnel                | [99] Ne sait pas                          |                                       |                                       |
| [5] Pharmacien                             | [98] Pas de réponse                       |                                       |                                       |
| Code _____                                 | Code _____                                | Code _____                            | Code _____                            |

**13 (Les membres de ce ménage pour lesquels une fièvre typhoïde a été diagnostiquée comme indiqué à la question 11 ont-ils reçu un traitement?) Quel traitement ont-ils reçu?**

*Instructions* : Cocher une réponse par membre du ménage uniquement.

| Membre 1<br>Initiales/Identifiant: __              | Membre 2<br>Initiales/Identifiant: __              | Membre 3<br>Initiales/Identifiant: __              | Membre 4<br>Initiales/Identifiant: __              |
|----------------------------------------------------|----------------------------------------------------|----------------------------------------------------|----------------------------------------------------|
| <input type="radio"/> 1=Traitement, préciser _____ | <input type="radio"/> 1=Traitement, préciser _____ | <input type="radio"/> 1=Traitement, préciser _____ | <input type="radio"/> 1=Traitement, préciser _____ |
| <input type="radio"/> 2=Pas applicable             | <input type="radio"/> 2=Pas applicable             | <input type="radio"/> 2=Pas applicable             | <input type="radio"/> 2=Pas applicable             |
| <input type="radio"/> 99=Ne sait pas               | <input type="radio"/> 99=Ne sait pas               | <input type="radio"/> 99=Ne sait pas               | <input type="radio"/> 99=Ne sait pas               |
| <input type="radio"/> 98=Pas de réponse            | <input type="radio"/> 98=Pas de réponse            | <input type="radio"/> 98=Pas de réponse            | <input type="radio"/> 98=Pas de réponse            |

Site \_\_\_\_ Sous-zone \_\_\_\_ Numéro d'habitation \_\_\_\_ Identifiant de l'enquêteur \_\_\_\_

**FORMULAIRE 5: ÉVALUATION DE L'UTILISATION RÉELLE DES SOINS DE SANTÉ GLOBAUX, STRATIFIÉE SELON L'ÂGE ET LE SEXE**

**Partie A: Évaluation de l'utilisation *réelle* des soins de santé  
COMPORTEMENT DE RECHERCHE DE SOINS**

**1 Consigner ci-dessous l'apparition de signe(s) ou symptôme(s) (voir liste 1) et préciser où (voir liste 2) et comment le(s) membre(s) a/ont recherché les soins de santé durant les 3 derniers mois ?**

*Instructions* : voir « formulaire 3- partie A-INFORMATIONS GENERALES SUR LE MENAGE » pour obtenir les initiaux/identifiants de chacun des membres du ménage. Indiquer seulement un signe/symptôme par ligne. Commencer avec une nouvelle ligne pour tous nouveaux soins de santé sélectionnés pour chaque signe/symptôme récurrent. Indiquer le nombre des apparitions de chaque signe/symptômes durant les 3 derniers mois. Si une différente option de soins de santé a été sélectionnée pour un signe/symptôme récurrent, indiquer cela dans une nouvelle ligne. Compléter s'il vous plaît, un formulaire supplémentaire s'il y a eu plus de 20 signes/symptômes apparus durant les 3 derniers mois.

| Liste 1:<br>Signe/Symptôme                                                                                                                                                                                                                                                                                                                                                                  |                                                                                                                                                                                                                                                                                                                                                                                                                                                                   | Liste 2:<br>Option de soins de santé                                                                                                                                               |
|---------------------------------------------------------------------------------------------------------------------------------------------------------------------------------------------------------------------------------------------------------------------------------------------------------------------------------------------------------------------------------------------|-------------------------------------------------------------------------------------------------------------------------------------------------------------------------------------------------------------------------------------------------------------------------------------------------------------------------------------------------------------------------------------------------------------------------------------------------------------------|------------------------------------------------------------------------------------------------------------------------------------------------------------------------------------|
| [A] Fièvre<br>[B] Fièvre <3 jours (continus)<br>[C] Fièvre ≥3 jours (continus)<br>[D] Frissons/Tremblements<br>[E] Convulsion<br>[F] Perte de poids<br>[G] Déshydratation<br>[H] Malaise/Faibles/Fatigue<br>[I] Douleurs (muscles/articulations/os)<br>[J] Maux de tête<br>[K] Vertiges/Confusion/ Perte de connaissance<br>[L] Troubles de la pression sanguine<br>[M] Troubles cardiaques | [N] Nausée/Vomissements<br>[O] Diarrhée (liquide/sanglante/mucopurulente)<br>[P] Douleur abdominale/Douleur intestinale<br>[Q] Perte de sang/Hémorragie (interne)<br>[R] Perte de sang/Hémorragie (externe)<br>[S] Éternuements Nez qui coule<br>[T] Toux<br>[U] Respiration rapide/Essoufflement<br>[V] Difficultés respiratoires graves<br>[W] Inflammation de la peau (éruptions cutanées/ rougeurs/pus/démangeaisons)<br>[X] Gonflement/Œdème<br>[Y] Jaunisse | [1] EDS-SETA,<br>Code _____<br>[2] Autre EDS<br>Code _____<br>[3] Médecin<br>[4] Pharmacie<br>[5] Guérisseur traditionnel<br>[6] Nulle part Auto-médication<br>[7] Nulle part Rien |

| No. | Membre du ménage<br>Enregistrer les initiaux/identifiants du membre du ménage ; voir formulaire 3 – partie A- INFORMATIONS GENERALES SUR LE MENAGE » | Signes/<br>Symptômes<br>Utiliser la Liste 1 pour sélectionner le code | Options de soins de santé                     |          | Fréquence<br>Indiquer le nombre d'incidences pour le signe/symptôme listé |
|-----|------------------------------------------------------------------------------------------------------------------------------------------------------|-----------------------------------------------------------------------|-----------------------------------------------|----------|---------------------------------------------------------------------------|
|     |                                                                                                                                                      |                                                                       | Utiliser la Liste 2 pour sélectionner le code | EDS Code |                                                                           |
| 1   |                                                                                                                                                      |                                                                       |                                               |          |                                                                           |
| 2   |                                                                                                                                                      |                                                                       |                                               |          |                                                                           |
| 3   |                                                                                                                                                      |                                                                       |                                               |          |                                                                           |
| 4   |                                                                                                                                                      |                                                                       |                                               |          |                                                                           |
| 5   |                                                                                                                                                      |                                                                       |                                               |          |                                                                           |

1  
2  
3  
4  
5  
6  
7  
8  
9  
10  
11  
12  
13  
14  
15  
16  
17  
18  
19  
20  
21  
22  
23  
24  
25  
26  
27  
28  
29  
30  
31  
32  
33  
34  
35  
36  
37  
38  
39  
40  
41  
42  
43  
44  
45  
46  
47  
48  
49  
50  
51  
52  
53  
54  
55  
56  
57  
58  
59  
60

|    |  |  |  |  |
|----|--|--|--|--|
| 6  |  |  |  |  |
| 7  |  |  |  |  |
| 8  |  |  |  |  |
| 9  |  |  |  |  |
| 10 |  |  |  |  |
| 11 |  |  |  |  |
| 12 |  |  |  |  |
| 13 |  |  |  |  |
| 14 |  |  |  |  |
| 15 |  |  |  |  |
| 16 |  |  |  |  |
| 17 |  |  |  |  |
| 18 |  |  |  |  |
| 19 |  |  |  |  |
| 20 |  |  |  |  |

For peer review only

**Appendix 5/Supplementary file 7: System diagram of the data collection and data management platform: the Android application “HPA Collect” and the platform “HPA Web”**

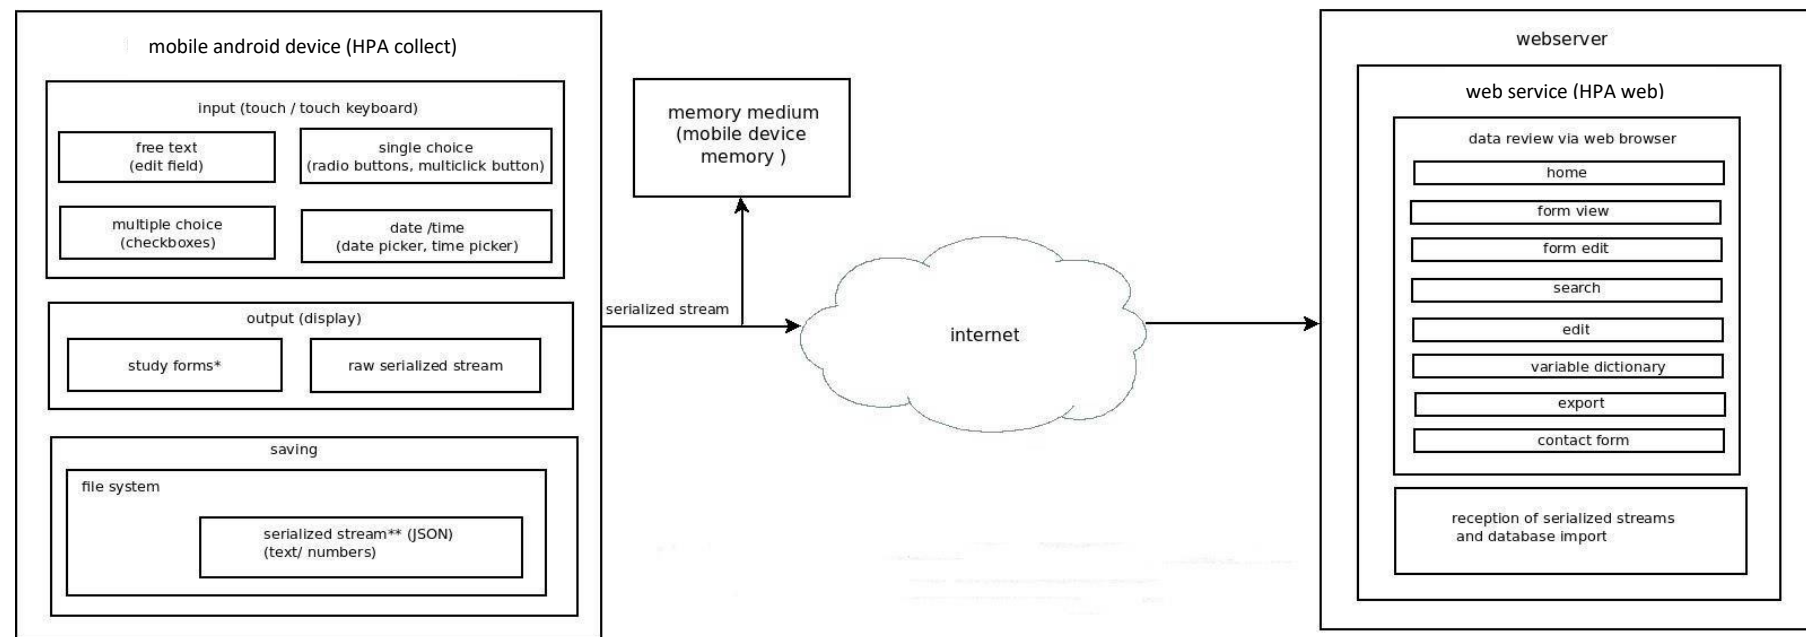

Note. \*study forms: Form 1, Form 3 Part A to C, Form 4 Part A to B, Form 5; \*\*serialized stream: two- or more-dimensional data (e.g. a table) is brought to a one-dimensional form; the application uses the JSON (Java Script Object Notation) format.

# BMJ Open

## The HPAfrica Study Protocol: Assessment of health behavior and population-based socio-economic, hygiene behavioral factors - a standardized repeated cross-sectional study in multiple cohorts in sub-Saharan Africa

|                               |                                                                                                                                                                                                                                                                                                                                                                                                                                                                                                                                                                                                                                                                                                                                                                                                                                                                                                                                                                                                                                                                                                                                                                                                                                                                                                                                                                                                                                                                                                                                                                                                                                                                                                                                                                                                                                                                                                                                                                                                                                                                                                                                                                      |
|-------------------------------|----------------------------------------------------------------------------------------------------------------------------------------------------------------------------------------------------------------------------------------------------------------------------------------------------------------------------------------------------------------------------------------------------------------------------------------------------------------------------------------------------------------------------------------------------------------------------------------------------------------------------------------------------------------------------------------------------------------------------------------------------------------------------------------------------------------------------------------------------------------------------------------------------------------------------------------------------------------------------------------------------------------------------------------------------------------------------------------------------------------------------------------------------------------------------------------------------------------------------------------------------------------------------------------------------------------------------------------------------------------------------------------------------------------------------------------------------------------------------------------------------------------------------------------------------------------------------------------------------------------------------------------------------------------------------------------------------------------------------------------------------------------------------------------------------------------------------------------------------------------------------------------------------------------------------------------------------------------------------------------------------------------------------------------------------------------------------------------------------------------------------------------------------------------------|
| Journal:                      | <i>BMJ Open</i>                                                                                                                                                                                                                                                                                                                                                                                                                                                                                                                                                                                                                                                                                                                                                                                                                                                                                                                                                                                                                                                                                                                                                                                                                                                                                                                                                                                                                                                                                                                                                                                                                                                                                                                                                                                                                                                                                                                                                                                                                                                                                                                                                      |
| Manuscript ID                 | bmjopen-2017-021438.R1                                                                                                                                                                                                                                                                                                                                                                                                                                                                                                                                                                                                                                                                                                                                                                                                                                                                                                                                                                                                                                                                                                                                                                                                                                                                                                                                                                                                                                                                                                                                                                                                                                                                                                                                                                                                                                                                                                                                                                                                                                                                                                                                               |
| Article Type:                 | Protocol                                                                                                                                                                                                                                                                                                                                                                                                                                                                                                                                                                                                                                                                                                                                                                                                                                                                                                                                                                                                                                                                                                                                                                                                                                                                                                                                                                                                                                                                                                                                                                                                                                                                                                                                                                                                                                                                                                                                                                                                                                                                                                                                                             |
| Date Submitted by the Author: | 06-Apr-2018                                                                                                                                                                                                                                                                                                                                                                                                                                                                                                                                                                                                                                                                                                                                                                                                                                                                                                                                                                                                                                                                                                                                                                                                                                                                                                                                                                                                                                                                                                                                                                                                                                                                                                                                                                                                                                                                                                                                                                                                                                                                                                                                                          |
| Complete List of Authors:     | <p>Pak, GiDeok; International Vaccine Institute, Biostatistics &amp; Data Management</p> <p>Haselbeck, Andrea; International Vaccine Institute, Epidemiology</p> <p>Seo, Hyeong-Won; International Vaccine Institute, Biostatistics &amp; Data Management</p> <p>Osei, Isaac; Kumasi Centre for Collaborative Research in Tropical Medicine, Kwame Nkrumah University of Science and Technology (KNUST)</p> <p>Amuasi, John; Kumasi Centre for Collaborative Research in Tropical Medicine, Kwame Nkrumah University of Science and Technology (KNUST)</p> <p>Breiman, Robert; Emory University , Global Health Institute</p> <p>Cruz Espinosa, Ligia Maria; International Vaccine Institute, Epidemiology</p> <p>Im, Justin; International Vaccine Institute, Epidemiology</p> <p>Jang, Geun-Hyeog; International Vaccine Institute, Biostatistics &amp; Data Management</p> <p>Jeon, Hyonjin; International Vaccine Institute, Epidemiology</p> <p>Luby, Stephen; Stanford University Division of Infectious Diseases and Geographic Medicine</p> <p>Lunguya-Metila, Octavie; Institut National de Recherche Biomedicales; Service de Microbiologie, Cliniques Universitaires de Kinshasa</p> <p>MacWright, William; Global Health Institute, Emory University</p> <p>Mogeni, Ondari; International Vaccine Institute, Epidemiology</p> <p>Okeke, Iruka; University of Ibadan</p> <p>Owusu-Dabo, Ellis; Kwame Nkrumah Univeristy of Science and Technology, School of Public Health</p> <p>Park, Jin Kyung; International Vaccine Institute, Biostatistics &amp; Data Management</p> <p>Park, SeEun; International Vaccine Institute, Epidemiology</p> <p>Popoola, Femi; University of Ibadan</p> <p>Seo, Hye-jin; International Vaccine Institute, Epidemiology</p> <p>Soura, Abdramane ; Institut Superieur des Sciences de la Population, University of Ouagadougou</p> <p>Teferi, Mekonnen; Armauer Hansen Research Institute, ALERT Campus</p> <p>Toy, Trevor; International Vaccine Institute, Epidemiology</p> <p>Chon, Yun; International Vaccine Institute, Biostatistics &amp; Data Management</p> <p>Rahaniminina, Lydia; Universite d'Antananarivo</p> |

|                                  |                                                                                                                                                                                                                                                                                                                                                                     |
|----------------------------------|---------------------------------------------------------------------------------------------------------------------------------------------------------------------------------------------------------------------------------------------------------------------------------------------------------------------------------------------------------------------|
|                                  | Rakotozandrindrainy, Raphael; Universite d'Antananarivo Meyer, Christian; Institute of Tropical Medicine, Eberhard Karls University; Faculty of Medicine, Duy Tan University Marks, Florian ; International Vaccine Institute, Epidemiology; The Department of Medicine, The University of Cambridge Panzner, Ursula; International Vaccine Institute, Epidemiology |
| <b>Primary Subject Heading</b> : | Epidemiology                                                                                                                                                                                                                                                                                                                                                        |
| Secondary Subject Heading:       | Epidemiology, Global health, Health services research, Infectious diseases, Public health                                                                                                                                                                                                                                                                           |
| Keywords:                        | health/hygiene behavior, sanitation, socio-economic, geospatial random selection, sub-Saharan Africa, HPAfrica study                                                                                                                                                                                                                                                |
|                                  |                                                                                                                                                                                                                                                                                                                                                                     |

SCHOLARONE™  
Manuscripts



1  
2  
3  
4 **1 The HPAfrica Study Protocol: Assessment of health behavior and population-based**  
5 **2 socio-economic, hygiene behavioral factors - a standardized repeated cross-sectional**  
6 **3 study in multiple cohorts in sub-Saharan Africa**  
7 **4**

8 **5 Short Title**

9 The **Health Population Africa** (HPAfrica) study  
10

11 **8 Authors**

12 Gi-Deok Pak<sup>1#</sup>, Andrea Haselbeck<sup>1#</sup>, Hyeong-Won Seo<sup>1</sup>, Isaac Osei<sup>2</sup>, John Amuasi<sup>2</sup>, Robert Breiman<sup>3</sup>, Ligia  
13 Maria Cruz Espinoza<sup>1</sup>, Justin Im<sup>1</sup>, Geun-Hyeog Jang<sup>1</sup>, Hyon-Jin Jeon<sup>1</sup>, Stephen Luby<sup>4</sup>, Octavie Lunguya-  
14 Metila<sup>5,6</sup>, William MacWright<sup>3</sup>, Ondari D. Mogeni<sup>1</sup>, Iruka N. Okeke<sup>7</sup>, Ellis Owusu-Dabo<sup>8</sup>, Jin-Kyung Park<sup>1</sup>, Se  
15 Eun Park<sup>1</sup>, Oluwafemi Popoola<sup>7</sup>, Hye-Jin Seo<sup>1</sup>, Abdramane Bassiahi Soura<sup>9</sup>, Mekonnen Teferi<sup>10</sup>, Trevor Toy<sup>1</sup>,  
16 Yun Chon<sup>1</sup>, Lydia Beithine Rahaniminina<sup>11</sup>, Raphael Rakotozandrindrainy<sup>11</sup>, Christian G. Meyer<sup>12,13</sup>, Florian  
17 Marks<sup>1,14\*</sup> and Ursula Panzner<sup>1</sup>  
18

19 **16 Affiliations**

- 20 1. International Vaccine Institute, Seoul, Republic of Korea  
21 2. Kumasi Centre for Collaborative Research in Tropical Medicine, Kwame Nkrumah University of Science and  
22 Technology (KNUST), Kumasi, Ghana  
23 3. Global Health Institute, Emory University, Atlanta, United States  
24 4. Infectious Diseases and Geographic Medicine, Stanford University, Stanford, United States  
25 5. Institut National de Recherche Biomédicales, Kinshasa, Democratic Republic of Congo  
26 6. Service de Microbiologie, Cliniques Universitaires de Kinshasa, Kinshasa, Democratic Republic of the Congo  
27 7. University of Ibadan, Ibadan, Nigeria  
28 8. School of Public Health, Kwame Nkrumah University of Science and Technology, Kumasi, Ghana  
29 9. Institut Supérieur des Sciences de la Population, University of Ouagadougou, Ouagadougou, Burkina Faso  
30 10. Armauer Hansen Research Institute, Jimma Road, ALERT Campus, Addis Ababa, Ethiopia  
31 11. University of Antananarivo, Antananarivo, Madagascar  
32 12. Institute of Tropical Medicine, Eberhard Karls University, Tübingen, Germany  
33 13. Faculty of Medicine, Duy Tan University, Da Nang, Vietnam  
34 14. The Department of Medicine, The University of Cambridge, Cambridge, United Kingdom  
35

36 # Contributed equally  
37

38 \*Corresponding Author:

39 Florian Marks, MPH, PhD, International Vaccine Institute, SNU Research Park, 1 Gwanak-ro, Gwanak-gu,  
40 Seoul, 08826, Republic of Korea, Phone: +82-2-881-1133, Fax: +82-2-881-1164, E-mail: fmarks@ivi.int  
41  
42  
43  
44  
45  
46  
47  
48  
49  
50  
51  
52  
53  
54  
55  
56

1  
2  
3  
4 40 **Abstract**

5  
6 41 **Introduction**

7  
8 42 The objective of the **Health Population Africa** (HPAfrica) study is to determine health behavior and  
9  
10 43 other population-based factors, including socio-economic, ethnographic, hygiene and sanitation  
11  
12 44 factors, at sites of the Severe Typhoid Fever in Africa (SETA) program. SETA aims to investigate  
13  
14 45 healthcare facility-based fever surveillance in Burkina Faso, the Democratic Republic of the Congo  
15  
16 46 (DRC), Ethiopia, Ghana, Madagascar, and Nigeria. Meaningful disease burden estimates require  
17  
18 47 adjustment for health behavior patterns, which are assumed to vary among a study population.  
19  
20 48

21  
22 49 **Methods and Analysis**

23  
24 50 For the minimum sample size required, the assumptions of an infinite population, a design effect, and  
25  
26 51 age- and sex-stratification are considered. In the absence of a sampling frame or household list, a  
27  
28 52 geospatial approach will be used to generate geographic random points with an Aeronautical  
29  
30 53 Reconnaissance Coverage Geographic Information System (ArcGIS) tool. Printouts of Google Earth  
31  
32 54 Pro<sup>®</sup> satellite imagery visualize these points. Data of interest will be assessed in different seasons by  
33  
34 55 applying simple, population weighted-stratified sampling. An Android-based application and a web  
35  
36 56 service have been developed for electronic data capturing and synchronization with the database  
37  
38 57 server in real time. Descriptive data analyses will be performed in order to assess baseline information  
39  
40 58 of each study population and age- and sex-stratified health behavior. This will allow adjusting disease  
41  
42 59 burden estimates. In addition, multivariate analyses will be applied to look into associations between  
43  
44 60 health behavior, population-based factors, and the disease burden as determined in the SETA study.  
45  
46 61

1  
2  
3  
4 62 **Strengths and limitations of this study**

- 5  
6 63 • Standardization in community-based multi-country/-site research requires cautiousness  
7  
8 64 considering variations in setting, language and culture.  
9  
10 65 • Large-scale public health assessments will complement disease burden data by investigating  
11  
12 66 sources of transmission and infection.  
13  
14 67 • Current population data in study sites and their administratively-defined subareas are assumed  
15  
16 68 to be limited.  
17  
18 69 • Electronic data collection may cause technical problems related to damage, functional failure,  
19  
20 70 or loss of devices.  
21  
22 71 • Unstable wireless internet connection may limit data teams to update the Android-based  
23  
24 72 application, communicate with study managers in real time, and synchronize collected data  
25  
26 73 with the server.  
27  
28 74

29  
30 75 **Registration:** Not required  
31

32 76  
33  
34 77 **Keywords:** health/hygiene behavior, sanitation, socio-economic, geospatial random selection, sub-  
35  
36 78 Saharan Africa, HPAfrica study  
37  
38  
39  
40  
41  
42  
43  
44  
45  
46  
47  
48  
49  
50  
51  
52  
53  
54  
55  
56  
57  
58  
59  
60

## 79 **Introduction**

80 Assessment of health behavior, including healthcare utilization, is an important determinant for the  
81 generation of accurate disease burden estimates among target populations. This is particularly critical  
82 for studies which utilize observational, healthcare facility-based surveillance designs as substantial  
83 variation in health behavior patterns strongly influences disease burden estimates<sup>1 2</sup>. The adjustment of  
84 disease burden calculations for variation in health behavior will increase the accuracy of assessing  
85 prevalences of diseases caused by bacterial, fungal, viral, and parasitic pathogens among populations  
86 under investigation. Furthermore, the influence of a large variety of population-based factors on both  
87 health behavior and disease burden has been recognized. This includes socioeconomic factors such as  
88 education, occupation, income, the availability of household assets<sup>3 4</sup>, ethnical/religious and cultural  
89 factors<sup>5 6</sup>, but also hygiene and sanitation facilities<sup>7-11</sup>, food handling<sup>12-14</sup>, and animal contacts<sup>10</sup>.

90  
91 The **Health Population Africa** (HPAfrica) study will be conducted in Burkina Faso, Democratic  
92 Republic of the Congo (DRC), Ethiopia, Ghana, Madagascar, and Nigeria. Experiences from the  
93 Typhoid Fever Surveillance in Africa Program (TSAP) will be transferred to the Severe Typhoid in  
94 Africa (SETA) program<sup>15 16</sup>. In this program, standardized, healthcare facility-based fever surveillance  
95 is performed at selected study sites in participating countries over a two-years period<sup>17</sup>. SETA  
96 primarily aims to systematically collect information on the burden of severe *Salmonella* infections.  
97 Subjects living in defined catchment areas with either an acute fever episode, a fever history of  $\geq 3$   
98 consecutive days, clinically-suspected typhoid fever or clinically-diagnosed gastrointestinal  
99 perforations due to typhoid fever will be eligible. In addition, the severity of *Salmonella* caused  
100 illnesses and the natural history of *Salmonella* infection will be recorded with further analyses on host  
101 immune responses and chronic carriage.

## 102 103 **Objectives and Outcomes**

104 The goal of the HPAfrica study is to assess the *generic* and *actual* age- and sex-stratified health  
105 behavior. *Generic* health behavior pertains to behavior in conditions associated with fever and other

1  
2  
3  
4 106 signs and symptoms unrelated to onsets, whereas *actual* health behavior is related to onsets (Appendix  
5  
6 107 1/Supplementary file 1; Appendix 2/Supplementary file 2: Form 4 Part A, Form 5; Appendix  
7  
8 108 3/Supplementary file 3). These data will be used to adjust age- and sex-stratified incidences of  
9  
10 109 infectious pathogens in the proportion of a study population not captured by activities of HPAfrica.  
11  
12 110 Data documented for various signs and symptoms or a combination of these will be used for a gradual  
13  
14 111 classification of healthcare utilization based on disease severity.  
15  
16 112

17  
18 113 The HPAfrica study will, moreover, collect data on healthcare-associated factors such as travel  
19  
20 114 modalities, possession of a health insurance, cultural/ethnographic factors, immunization status  
21  
22 115 among children<sup>18 19</sup>, and the frequency of occurrence and individual perception of selected diseases  
23  
24 116 (Appendix 2/Supplementary file 2: Form 4 Part B; Appendix 3/Supplementary file 3:Form 4 Part B).  
25  
26 117 Demographic data (Appendix 2/ Supplementary file 2: Form 3 Part A; Appendix 3/Supplementary file  
27  
28 118 3, Form 3 Part A) will be used for age- and sex-stratification of the population surveyed, which is  
29  
30 119 required to compute adjustment factors for disease incidences. Socio-economic data (Appendix 2/  
31  
32 120 Supplementary file 2: Form 3 Part B; Appendix 3/ Supplementary file 3: Form 3 Part B) will be  
33  
34 121 utilized to calculate wealth indices for descriptive and analytical approaches of the populations  
35  
36 122 studied. Information on hygiene and sanitation facilities (Appendix 2/ Supplementary file 2: Form 3  
37  
38 123 Part C; Appendix 3/Supplementary file 3: Form 3 Part C) may provide a better understanding of the  
39  
40 124 occurrence and frequency of pathogens identified in the populations studied.  
41  
42 125

## 43 126 **Methods**

### 44 127 **Study sites**

45  
46  
47 128 The boundaries of each site will be defined using pre-existing information set by statistical authorities  
48  
49 129 or ministries of health (Table 1). A retrospective review of records of recruitment healthcare facilities  
50  
51 130 from the past two years will support the re-definement of site limits. It is expected that this review  
52  
53 131 will reveal the residences or at least the broader administrative residential areas such as communities,  
54  
55 132 districts or villages of patients who sought healthcare for any reason. Maps and satellite imagery may

1  
2  
3  
4  
5  
6  
7  
8  
9  
10  
11  
12  
13  
14  
15  
16  
17  
18  
19  
20  
21  
22  
23  
24  
25  
26  
27  
28  
29  
30  
31  
32  
33  
34  
35  
36  
37  
38  
39  
40  
41  
42  
43  
44  
45  
46  
47  
48  
49  
50  
51  
52  
53  
54  
55  
56  
57  
58  
59  
60

133 be used to better visualize patients' residences and the overall boundaries, including the  
134 geographically or administratively defined subareas, of each site. Where boundaries cannot be clearly  
135 defined, additional factors such as the distance to a recruitment healthcare facility may be considered.

For peer review only

136 **Table 1: Background data of participating study sites of target countries**

| Country      | Study site                               | Setting*    | Approximate total site population (year) | Approximate age-stratified site population |                  |                  |                  | Approximate sex-stratified site population |                     |
|--------------|------------------------------------------|-------------|------------------------------------------|--------------------------------------------|------------------|------------------|------------------|--------------------------------------------|---------------------|
|              |                                          |             |                                          | <2y                                        | ≥2y to <5y       | ≥5y to <15y      | ≥15y             | Male                                       | Female              |
| Burkina Faso | Nioko II <sup>1</sup>                    | Urban       | 19,251 (2017)                            | 2,394                                      | 1,977            | 4,657            | 10,223           | 9,321                                      | 9,930               |
|              | Polesgo <sup>1</sup>                     | Rural       | 7,897 (2017)                             | 934                                        | 893              | 1,808            | 4,262            | 3,856                                      | 4,041               |
|              | Ouagadougou <sup>1</sup>                 | Urban       | 2,532,311 (2015)                         | 421,429                                    | 693,723          | 1,417,159        | 1,271,302        | 1,261,009                                  |                     |
| DRC          | Kisantu <sup>2</sup>                     | Urban       | 291,252 (2017)                           | 48,043                                     |                  | 243,209          |                  | 91,598 <sup>#</sup>                        | 99,231 <sup>#</sup> |
| Ethiopia     | Wolayita Zone <sup>3</sup>               | Urban/Rural | 1,968,735 (2017)                         | 100,800                                    | 206,520          | 635,015          | 1,026,300        | 964,577                                    | 1,004,058           |
|              | Wolayita Sodo <sup>3</sup>               | Urban/Rural | 120,288 (2017)                           | 6,161                                      | 12,617           | 38,807           | 62,703           | 59,898                                     | 60,390              |
|              | East Shewa & Arsi Zone <sup>3</sup>      | Urban/Rural | 3,249,722 (2017)                         | 104,408                                    | 422,939          | 1,016,917        | 1,705,458        | 1,671,699                                  | 1,578,023           |
|              | Adama Wenji <sup>3</sup>                 | Urban/Rural | 53,540 (2017)                            | 3,330                                      | 7,204            | 17,028           | 25,978           | 27,199                                     | 26,341              |
| Ghana        | Asante Akim North & Central <sup>4</sup> | Urban/Rural | 140,694 (2010)                           | 11,606                                     | 8,363            | 35,618           | 85,107           | 67,673                                     | 73,021              |
|              | Kumasi (Metropolis) <sup>4,5</sup>       | Urban       | 1,730,249 (2010)                         | 52,516                                     | 178,575          | 421,834          | 1,077,324        | 826,479                                    | 903,770             |
| Madagascar   | Antananarivo <sup>6</sup> (Renivohitra)  | Urban       | 1,247,025 (2009)                         | N/A <sup>§</sup>                           | N/A <sup>§</sup> | N/A <sup>§</sup> | N/A <sup>§</sup> | N/A <sup>§</sup>                           | N/A <sup>§</sup>    |
|              | Imerintsiatosika <sup>7</sup>            | Rural       | 44,669 (2016)                            | 3,582                                      | 4,449            | 7,610            | 29,028           | N/A <sup>§</sup>                           | N/A <sup>§</sup>    |
| Nigeria      | Ibadan <sup>8</sup>                      | Urban       | 1,343,147 (2006)                         | 176,110                                    |                  | 305,656          | 861,381          | 661,818                                    | 681,329             |

Note. Table 1 shows population data that were available at the time of the HPAfrica protocol writing; population data and boundaries of geographically and/or administratively defined study sites may be subject to changes during the course of the study. \*The classification of sites by country is based on best local knowledge; #The sex-stratification is based on a total population of 190,829; §Population data not available at the time of protocol writing; y= years of age.

Source of population data: **Burkina Faso** (<sup>1</sup><http://www.insd.bf/n/>); <sup>2</sup><http://www.indepth-network.org/member-centres/ouagadougou-hdss/>); **DRC** (<sup>2</sup>Kisantu Central Health Zone Office report, 2016); **Ethiopia** (<sup>3</sup>Health Management Information System of the Ethiopian Ministry of Health (zonal and district health offices); **Ghana** (<sup>4</sup>Ghana Statistical Service, 2010 Population & Housing Census, Asante Akim Central Municipality; <sup>5</sup>Ghana Statistical Service, 2010 Population & Housing Census, Summary report of final results); **Madagascar** (<sup>6</sup>Population par Fokotany selon la declaration des Chefs Fokotany: Source: Donnee de la cartographie censitaire mises-a-jour en juillet 2009 - INSTAT/DDSS; <sup>7</sup>University of Antananarivo); **Nigeria** (<sup>8</sup>Federal Republic of Nigeria 2006 Population and Housing Census (Table DS5), National Population Commission, Abuja, Nigeria).

1  
2  
3  
4 147 **Sample size**

5  
6 148 All available sources will be used to gather most up-to-date age- and sex-stratified population data by  
7  
8 149 study site and its administratively or geographically defined subareas. This may include latest  
9  
10 150 demographic information from a population census or a Demographic Surveillance System  
11  
12 151 (DSS)/Health and Demographic Surveillance System (HDSS). Population summary figures and  
13  
14 152 population growth factors, if available, may also be used.  
15

16 153  
17  
18 154 The minimum number of randomly selected households to be interviewed will be calculated using the  
19  
20 155 precision-based equation (Equation-I)<sup>20-23</sup> assuming an infinite population and considering a design  
21  
22 156 effect (DEFF), including its accompanying assumptions:  
23

24 157

25  
26 158 **Equation-I: precision-based sample size calculation for an infinite population<sup>20-23</sup>:**  
27 159

$$n_0 = DEFF \cdot \left[ z^2_{1-\alpha/2} \cdot \frac{4 \cdot p \cdot (1-p)}{d^2} \right]$$

28  
29 160  
30 161

31 Assumptions Equation-I

|                    |                                                                                                                                                                                            |
|--------------------|--------------------------------------------------------------------------------------------------------------------------------------------------------------------------------------------|
| n <sub>0</sub>     | Minimum number of households to be interviewed in a study area assuming an infinite population                                                                                             |
| DEFF               | Design effect; set at 1.5                                                                                                                                                                  |
| z <sub>1-α/2</sub> | Normal deviation corresponding to a 95% confidence interval (1.96 for alpha of 0.05)                                                                                                       |
| D                  | Precision (acceptable error); point estimation; set at 0.2                                                                                                                                 |
| p                  | Proportion of the study population expected to visit a recruitment healthcare facility for conditions associated with fever and other signs and symptoms (proportion captured); set at 0.2 |
| 1-p                | Proportion of the study population expected to not visit a recruitment healthcare facility for conditions associated with fever and other signs and symptoms (proportion not captured)     |

32  
33  
34  
35  
36  
37  
38  
39 162

40  
41 163 The design effect is an adjustment factor for natural clustering of health behavior among household  
42  
43 164 members<sup>21</sup>. It is arbitrarily set at 1.5, depending on the household size, as no exact estimates are  
44  
45 165 available<sup>24,25</sup>. A proportion p of 0.2 may be assumed if no other estimates are available or p may be  
46  
47 166 based on experiences during the TSAP study: Madagascar, Isotry: p=0.01, Burkina Faso, Polesgo:  
48  
49 167 p=0.9<sup>26</sup>. Combining all assumptions into Equation-I will result in a total minimum number (n<sub>0</sub>) of 92  
50  
51 168 household interviews at each site.  
52

53 169

54  
55 170 In addition, n<sub>0</sub> will be accounted for the age- and sex-distribution of a study population reflected by  $\hat{p}$ ,



171 the assumed minimum proportion of stratification per age group (<5 years, ≥5 to <15 years, ≥15  
 172 years). Factor  $\hat{p}$  may be arbitrarily set at 0.2 or may be based on previous experiences: Ethiopia,  
 173 Butajira:  $\hat{p}=0.09$ , Burkina Faso, Polesgo:  $\hat{p}=0.23^{26}$ . Applying  $\hat{p}$  to Equation-I for a binomial  
 174 distribution, including its accompanying assumptions, will result in the age-stratified minimum  
 175 number of household interviews ( $\bar{n}_0$ ) of 461 (Equation-II):

177 **Equation-II: precision-based sample size calculation for an infinite population considering age-**  
 178 **stratification:**

$$\bar{n}_0 = \left( DEFF \cdot \left[ z^2_{1-\alpha/2} \cdot \frac{4 \cdot p \cdot (1-p)}{d^2} \right] \right) / \hat{p}$$

180 Assumptions Equation-II

|                  |                                                                                                                                                                                            |
|------------------|--------------------------------------------------------------------------------------------------------------------------------------------------------------------------------------------|
| $\bar{n}_0$      | Minimum number of households to be interviewed in the study area assuming an infinite population and age-stratification                                                                    |
| DEFF             | Design effect; set at 1.5                                                                                                                                                                  |
| $z_{1-\alpha/2}$ | Normal deviation corresponding to a 95% confidence interval (1.96 for alpha of 0.05)                                                                                                       |
| D                | Precision (acceptable error); point estimation; set at 0.2                                                                                                                                 |
| p                | Proportion of the study population expected to visit a recruitment healthcare facility for conditions associated with fever and other signs and symptoms (proportion captured); set at 0.2 |
| 1-p              | Proportion of the study population expected to not visit a recruitment healthcare facility for conditions associated with fever and other signs and symptoms (proportion not captured)     |
| $\hat{p}$        | The minimum proportion of stratification per age group; set at 0.2                                                                                                                         |

181  
 182 Health behavior will be assessed twice at the same households if possible or at alternative households  
 183 in case the study population is instable due to migration and/or high birth/death rates. Additional  
 184 households, assumed to be 20% on average, (Table 2) may be added to account for possible loss to  
 185 follow-up between the two assessments. Eventually,  $\bar{n}_0$  of 553 will be divided by the number of  
 186 subareas and weighted proportionally to the population size by applying weighted-stratified  
 187 sampling<sup>27</sup>.

188  
 189 **Table 2: Sample sizes considering infinite population and age-stratification applying**  
 190 **Equation-II:**

| Proportion (p) | Total minimum number of households without DEFF | Total minimum number of households ( $n_0$ ) with DEFF=1.5 | Total minimum number of households ( $\bar{n}_0$ ) with DEFF=1.5 and $\hat{p}=0.2$ | $\bar{n}_0$ adjusted for loss to follow-up |
|----------------|-------------------------------------------------|------------------------------------------------------------|------------------------------------------------------------------------------------|--------------------------------------------|
| 0.1            | 35                                              | 52                                                         | 259                                                                                | 311                                        |
| 0.2            | 62                                              | 92                                                         | 461                                                                                | 553                                        |
| 0.3            | 81                                              | 121                                                        | 605                                                                                | 726                                        |
| 0.4            | 92                                              | 138                                                        | 691                                                                                | 830                                        |

|     |    |     |     |     |
|-----|----|-----|-----|-----|
| 0.5 | 96 | 144 | 720 | 864 |
| 0.6 | 92 | 138 | 691 | 830 |
| 0.7 | 81 | 121 | 605 | 726 |
| 0.8 | 62 | 92  | 461 | 553 |
| 0.9 | 35 | 52  | 259 | 311 |

191

192

**Abbreviations**

193

$p$ =Proportion of the study population expected to visit a recruitment healthcare facility for conditions associated with fever and other signs and symptoms (proportion captured); set at 0.2

194

195

DEFF=Design effect; set at 1.5

196

$n_0$ =Total minimum number of households to be interviewed in a study area assuming an infinite population

197

$\bar{n}_0$ =Total minimum number of households to be interviewed in the study area assuming an infinite population and age-stratification

198

199

$\hat{p}$ =Minimum proportion of stratification per age group; set at 0.2

200

**201 Sampling**

202

If comprehensive up-to-date sampling frames or household lists exist (through DSS/HDSS or

203

available census), computerized random selection will be done using SAS (Statistical Analysis System,

204

version 9.4, SAS Institute, Cary, NC) applying serial simple random selection without replacement. If

205

no sampling frame exists, it can be constructed using satellite imagery or aerial maps in order to

206

enumerate all structures<sup>26</sup>, rastering<sup>28</sup>, or grid cells<sup>29,30</sup>.

207

208

However, we apply a geospatial technique for the creation of points generated by the ArcGIS

209

(Aeronautical Reconnaissance Coverage Geographic Information System; Redlands, CA, USA,

210

version 10.2) random point generation tool with the application of simple, population weighted-

211

stratified sampling<sup>27,31</sup>. The tool randomly places specified numbers of points inside the features of a

212

polygon that corresponds to an administrative subarea. X- and Y-coordinates define one point until the

213

calculated sample size is reached. ArcGIS-generated random points are converted into an image file of

214

the Keyhole Markup Language (KML) or Keyhole Markup language Zipped (KMZ) format and

215

imported into Google Earth Pro<sup>®</sup> (Google Inc., Mountain View, CA, USA, version 6.2.2.6613). A

216

unique numerical identifier and horizontal geographic coordinates are assigned to each point. The

217

location of each point is verified on an up-to-date Google Earth Pro<sup>®</sup> satellite imagery. Appendix

218

4/Supplementary file 4 illustrates our approach when utilizing examples from Ghana and Madagascar.

219

220 Geographic points labeled with identifiers are pictured on poster-size (60x60 to 60x90 cm) printouts  
 221 of Google Earth Pro® satellite imagery with high resolution up to the structure level. The satellite  
 222 maps help to locate selected points on the ground. Alternatively to printouts, an open source  
 223 application for offline/online automated navigation and mapping may be used. Global Positioning  
 224 System (GPS) receivers (Garmin-eTrex; Garmin Ltd., Lenexa, KS, USA) allow verifying the  
 225 locations. The receivers will be positioned closely to a located point, in a static position and an open  
 226 area to assure barrier-free reading. In case of refusal, absence of the respondent or locating of a non-  
 227 residential point, a residential point closest to the right or left side will be visited instead<sup>32</sup>.

### 229 **Frequency of data collection**

230 Residential points will be visited twice for household interviews during the SETA program to assess  
 231 seasonal influences on health behavior<sup>33-37</sup>. Interviews will take place in differing seasons – one at the  
 232 end of the dry season or at least one month after its beginning and one towards at end of the wet  
 233 season or at least one month after its beginning (Table 3). Currently, the HPAfrica study is ongoing in  
 234 Burkina Faso, Ghana and Madagascar and is anticipated to be continued in the remaining countries  
 235 during the upcoming months.

237 **Table 3: Seasonality in participating countries**

| Country      | Period of Wet Season               | Period of Dry Season         |
|--------------|------------------------------------|------------------------------|
| Burkina Faso | May/June - September/October       | October/November - April/May |
| DRC          | November - March                   | April - October              |
| Ethiopia     | June - August                      | October - May                |
| Ghana        | April – July, September - November | December - March             |
| Madagascar   | November - March/April             | April/May - October          |
| Nigeria      | May - August                       | October - April              |

238 Note. The seasonality by country is based on best local knowledge.

### 240 **Inclusion and exclusion criteria**

241 Household members of all ages and both sexes living in a study area at the day of the interview will  
 242 be eligible for inclusion. A household will be excluded if the designated respondent declines  
 243 participation or is unavailable after three consecutive visits. All visitors and individuals with unknown

1  
2  
3  
4 244 residence or residence outside the study area will be excluded.

5  
6 245

7  
8 246 For the purpose of this investigation, a household is defined as a person or a group of related or  
9  
10 247 unrelated persons living in the same dwelling unit, acknowledging one adult individual as the  
11  
12 248 household head, sharing the same housekeeping arrangements, and independently procuring food and  
13  
14 249 other essential for living<sup>26</sup>.

15  
16 250

17  
18 251 The interview will exclusively be held with the respondent, who is an adult household member at the  
19  
20 252 country-specific legal age of majority. This person may be identified as decision-maker by members  
21  
22 253 of the same household and serves as a proxy for an entire household<sup>15</sup>. Further relevant definitions are  
23  
24 254 explained in Appendix 1/Supplementary file 1 and Appendix 3/Supplementary file 3.

25  
26 255

#### 27 256 **Data collection**

28  
29 257 On-site interviewers will be trained on locating the geographic points, identification of respondents,  
30  
31 258 informed consent procedures with emphasis on voluntary participation, and the deployment of  
32  
33 259 standardized, pre-tested study forms (Appendix 2/Supplementary file 2 and Appendix  
34  
35 260 3/Supplementary file 3) prior to the initiation of HPAfrica. Informed consent and study forms will be  
36  
37 261 translated into the country-specific official language and back-translated into English to account for  
38  
39 262 translation errors and to make corrections, where required.

40  
41 263

#### 42 264 **Data management**

43  
44 265 Management of data will depend on the mode of collection, which will be primarily electronic rather  
45  
46 266 than paper-based. Past experiences showed following disadvantages of paper-based data collection: a  
47  
48 267 high probability of errors while filling study forms, and the need of subsequent data digitalization,  
49  
50 268 which is an extra, labor- and time-intensive and error-prone step. Electronic data capturing using a  
51  
52 269 smartphone or tablet application minimizes these limiting factors to the data quality.

53  
54  
55 270

1  
2  
3  
4 271 There may be a pilot period during which both paper-based and paperless data will be collected prior  
5  
6 272 to full implementation of electronic data collection. The latter utilizes the Android application “HPA  
7  
8 273 Collect” (Google Android 5.0.1 9API 23; available at  
9  
10 274 <https://play.google.com/store/apps/details?id=anint.ivi.hpa>) and the platform “HPA Web” (CSS,  
11  
12 275 JavaScript and JSP; available at <http://hpa.ivi.int/>), which are both accompanied by a variable  
13  
14 276 dictionary containing codes, meaning and properties of variables in at least English and French. Stable  
15  
16 277 wireless internet connectivity using default browsers is required to assure a contemporaneous,  
17  
18 278 attributable, original and accurate synchronization of data between “HPA Collect” and “HPA Web”.  
19  
20 279 Access to both “HPA Collect” and “HPA Web” is password-protected. Appendix 5/Supplementary file  
21  
22 280 5 displays the system diagram, which has the following features:  
23  
24 281

#### 282 **Structure or features of “HPA Collect”**

- 283 • **User management:** A simple user interface provides different privileges for users to enter,  
284 edit (except for study labels), and export or transfer data. It establishes an audit trail that  
285 records when users enter data into the server.
- 286 • **Data input:** Data are entered directly into the smartphone or tablet device. Entry fields  
287 limit possible answers to plausible ones only by offering different input methods:
  - 288 ▪ Edit Text: free text
  - 289 ▪ Radio group/Multi click button: single choice
  - 290 ▪ Check box: multiple choice
  - 291 ▪ Date and time picker: entering date and time
  - 292 ▪ Spinner: drop-down button

293 Additional features allow the surveyor to save time by transferring data collected at an  
294 earlier stage to data fields required at a later stage of the interview by performing  
295 plausibility checks for diverse data input fields, and by easily recognizing skip patterns.  
296 Error checks, missing data notifications, code errors, and logical errors are also included.

- 1  
2  
3  
4 297       • **Data view:** Raw, originally entered data can be seen in the same, human- and machine-  
5  
6 298       readable format, namely the JSON format, as they will be transferred to a database server  
7  
8 299       (Windows, MySQL). Additional functions like “clear” to clear all records, “reset” to  
9  
10 300       return back to the main data entry page, and “search” to search for a study label are  
11  
12 301       available.
- 13  
14 302       • **Settings:** The ability to switch the system language between English and French is  
15  
16 303       provided.
- 17  
18 304       • **About:** The currently installed version of “HPA Collect” is displayed.
- 19  
20 305

#### 21 306       **Structure or features of “HPA Web”**

- 22  
23  
24 307       • **Home:** An introduction to the platform is given and a tutorial in French and English will  
25  
26 308       be accessible.
- 27  
28 309       • **Form View:** The study forms are displayed separately showing every question and the  
29  
30 310       corresponding input data as defined variables.
- 31  
32 311       • **Form Edit:** This feature allows the correction of the uploaded data. It is only accessible  
33  
34 312       to data managers in each participating country and at IVI.
- 35  
36 313       • **Search:** Specific study labels given to each study form can be filtered.
- 37  
38 314       • **Variable dictionary:** The variable dictionary can be downloaded.
- 39  
40 315       • **Export:** Data can be converted from the server into a transferrable excel file.
- 41  
42 316       • **Contact Us:** Quick and easy correspondence between users and the data manager at IVI  
43  
44 317       is given.
- 45  
46 318

47  
48 319       Data will be reviewed by key study personnel on a day-to-day basis and checked for consistency and  
49  
50 320       accuracy prior to data analysis. The quality of data may be checked by selecting a subset of 5% for  
51  
52 321       validation against the original, paper-based data if possible. Names of household members will not be  
53  
54 322       linked to study forms of HPAfrica and will not be recorded in the database in order to ensure  
55  
56 323       confidentiality. Access to the database will be restricted to authorized study personnel only and data

1  
2  
3  
4 324 will be kept in a locked, protected location. Periodic interim backup files and at least three final  
5  
6 325 backup files of the database stored in a secure, locked place will avoid loss of data and ensure data  
7  
8 326 safety. All data will be stored for a minimum of five years.  
9

10 327

### 11 328 **Data analysis**

12  
13 329 Descriptive analyses such as absolute and relative frequencies, medians or arithmetic means will be  
14  
15 330 conducted to construct a contemporary baseline population description.  
16

17 331

18  
19 332 Basic analyses will include the calculation of age- and sex-stratified proportions of *generic* and *actual*  
20  
21 333 health behavior, including healthcare utilization, for various signs and symptoms or combinations of  
22  
23 334 signs and symptoms. These analyses will allow for a gradual classification based on disease severity,  
24  
25 335 including 95% confidence interval. Health behavior will be adjusted for actual clustering among  
26  
27 336 household members. Most up-to-date stratified population data by site and demographic data derived  
28  
29 337 from HPAfrica will be used to generate the proportions for the adjustment of incidence calculations.  
30

31 338

32  
33 339 Socio-economic information collected will be used to construct wealth indices of studied populations  
34  
35 340 by applying factor analyses based on the principal component method. In addition, bi- and  
36  
37 341 multivariate regression analyses will be performed to identify potential confounding factors or effect  
38  
39 342 modification using factor scores.  
40

41 343

42  
43 344 Bi- and multivariate regression analyses will be carried out using factor scores for the assessment  
44  
45 345 of the following variables:

- 46  
47 346
- 48 • Socioeconomic data such as education, occupation<sup>38</sup>, health insurance, housing, and  
49 household assets
  - 50
  - 51 348 • Hygiene and sanitation such as toilet access, water sources, food handling, waste disposal,  
52 and animal contacts
  - 53 349
  - 54
  - 55 350 • Health behavior: *actual* (age- and sex-stratified, severity, frequency), *generic* (age- and  
56

- 1  
2  
3  
4 351 sex-stratified, severity, rating by choice)  
5  
6 352 • Travel modalities to health facilities, age-stratified  
7  
8 353 • Seasonality related to hygiene & sanitation, health behavior, travel modalities  
9  
10 354 • Cultural/religious/ethnographic factors, age-stratified  
11  
12 355 • Vaccination status among children<sup>18 19</sup>  
13  
14 356 • Knowledge and perception of common diseases  
15  
16 357  
17

### 18 358 **Ethical considerations**

19  
20 359 All study participants are required to provide written informed consent. There are no direct benefits  
21  
22 360 for enrolled households and their members. Indirect benefits for the general population at sites will be  
23  
24 361 the updated information on the burden of communicable diseases, including factors influencing  
25  
26 362 disease transmission and infection. The HPAfrica study generates evidence to support decision-  
27  
28 363 makers on the introduction of appropriate measures for disease prevention and control.  
29

30 364  
31  
32 365 This protocol was first approved by the Institutional Review Board of the International Vaccine  
33  
34 366 Institute in October 2016 and undergoes annual review and renewal also by Ethics Committees of  
35  
36 367 collaborating institutions (Ethics References are listed in Appendix1/Supplementary file1).  
37

38 368  
39  
40 369 During and after the HPAfrica study, all data of enrolled subjects will be kept in strict confidence and  
41  
42 370 will not be disclosed to a third party by any member of the research team. Password protection of  
43  
44 371 devices and the database is used for strict confidence. All paper-based data (consent forms) will be  
45  
46 372 kept in a secure, locked location. Confidential information stored on computers and paper-based data  
47  
48 373 sources will only be made available to co-investigators and IVI staff directly involved in study  
49  
50 374 activities of HPAfrica.  
51

52 375

### 53 376 **Patient and Public Involvement**

54  
55 377 No patients but household members in selected study sites will be involved. They did not participate  
56



1  
2  
3  
4 378 in the development of the research question, outcome measures and the study design. However, we  
5  
6 379 attempt to balance well between answering our study objectives and benefiting the general population  
7  
8 380 at the sites by disseminating information on the disease burden and factors influencing disease  
9  
10 381 transmission and infection derived from our study. Household members will contribute to the study  
11  
12 382 conduct by direct participating in the gathering of data. They will not be involved in recruitment  
13  
14 383 procedures. The households selected for participation will be identified purely by chance due to the  
15  
16 384 random sampling applied. Study findings will be disseminated to study populations directly through  
17  
18 385 collaborating institutions and indirectly through publications in peer-reviewed journals.  
19  
20 386

### 21 387 **Dissemination**

22  
23 388 We plan to disseminate the study findings by reporting descriptive as well as analytic and stratified  
24  
25 389 data through publications in peer-reviewed journals and collaborating institutions.  
26  
27 390

### 28 29 391 **Authors' contributions**

30  
31 392 GDP, JKP and UP conceptualized the initial study concept of the HPAfrica study. HWS and GHJ  
32  
33 393 developed the tools “HPA Collect” and “HPA Web” for electronic data collection with primary  
34  
35 394 support of UP and AH. IO and JA supported the development and finalizing of the data collection  
36  
37 395 tools “HPA Collect” and “HPA Web”. LBR and RR supported the development and finalization of the  
38  
39 396 HPAfrica study forms. The appendices were conceptualized by GDP, JKP, YC, JI, TT, AH and UP.  
40  
41 397 IO, JA, RB, LMCE, JI, HJJ, SL, OLM, WMW, ODM, INO, EOD, SP, OP, HJS, ABS, MT, TT, LBR  
42  
43 398 and RR supported the further development of the initial study protocol and appendices. FM, YC and  
44  
45 399 CGM participated in the finalization of the study protocol, including appendices. AH wrote the first  
46  
47 400 draft of the manuscript. GDP, HWS, IO, JA, RB, LMCE, JI, GHJ, HJJ, SL, OLM, WMW, ODM, INO,  
48  
49 401 EOD, JKP, SP, OP, HJS, ABS, MT, TT, YC, LBR, RR, CGM and FM critically reviewed and revised  
50  
51 402 the manuscript draft. GDP, AH, HWS, IO, JA, RB, LMCE, JI, GHJ, HJJ, SL, OLM, WMW, ODM,  
52  
53 403 INO, EOD, JKP, SP, OP, HJS, ABS, MT, TT, YC, LBR, RR, CGM, FM and UP agreed and approved  
54  
55 404 the final manuscript as submitted.  
56  
57  
58  
59  
60

405

**406 Acknowledgement**

407 We thank David Kauderer for the support and advice in computer engineering, Dr. Paul M. Tshiminyi  
408 for the support in proofreading French study materials, and Soo Young Kwon and Ji Hyun Han for  
409 administrative support. We are grateful to community leaders and site representatives for their  
410 assistance and facilitation in properly approaching household members for our study.

411

**412 Funding statement**

413 This study was supported by the Bill & Melinda Gates Foundation (OPP1127988). The funders had  
414 no role in study design, data collection, data analysis, data interpretation, or writing of the report; the  
415 conclusions and findings presented are those of the authors and do not necessarily reflect positions or  
416 policies of the Bill & Melinda Gates Foundation or the International Vaccine Institute (IVI). The IVI  
417 acknowledges its donors, including the Republic of Korea and the Swedish International Development  
418 Cooperation Agency (Sida).

419

**420 Competing interests**

421 The authors declare that they have no competing interests.

422

**423 Abbreviations**

424 JSON: JavaScript Objective Notation; CSS: Cascading Style Sheets; JSP: Java Server Page; SQL:  
425 Structured Query Language

426

**427 Appendices**

428 **Appendix1** (Supplementary file 1)

429 Ethic References

430 Definitions/Terminology (English)

1  
2  
3  
4 431 STROBE Statement—Checklist of items that should be included in reports of cross-sectional  
5  
6 432 studies

7  
8 433 **Appendix 2** (Supplementary file 2)

9  
10 434 Study Forms (English)

11  
12 435 Form 1: Record of household visits

13  
14 436 Form 2: Consent Form

15  
16 437 Form 3: General household information

17  
18 438 Part A: Demographic data/General household information

19  
20 439 Part B: Socio-economic data

21  
22 440 Part C: Hygiene and sanitation

23  
24 441 Form 4: Assessment of age- and sex-stratified *generic* healthcare utilization

25  
26 442 Part A: Assessment of *generic* healthcare utilization

27  
28 443 Part B: Healthcare-associated factors/Vaccination/Disease perception

29  
30 444 Form 5: Assessment of age- and sex-stratified *actual* healthcare utilization

31  
32 445 **Appendix 3** (Supplementary file 3)

33  
34 446 Protocol, Definitions/Terminology and Study Forms (French)

35  
36 447 **Appendix 4** (Supplementary file 4)

37  
38 448 Geospatial random selection (examples of Ghana and Madagascar)

39  
40 449 **Appendix 5** (Supplementary file 5)

41  
42 450 System diagram of the data collection and data management: the Android application “HPA

43  
44 451 Collect” and the platform “HPA Web”.

45  
46 452

47  
48 453 **References**

- 49 454 1. Bigogo G, Audi A, Aura B, et al. Health-seeking patterns among participants of population-  
50 455 based morbidity surveillance in rural western Kenya: implications for calculating disease  
51 456 rates. *Int J Infect Dis* 2010;14(11):e967-73. doi: 10.1016/j.ijid.2010.05.016  
52  
53 457 2. Jordan HT, Prapasiri P, Areerat P, et al. A comparison of population-based pneumonia  
54 458 surveillance and health-seeking behavior in two provinces in rural Thailand. *Int J Infect Dis*  
55 459 2009;13(3):355-61. doi: 10.1016/j.ijid.2008.07.014

- 460 3. Saeed BI, Xicang Z, Yawson AE, et al. Impact of socioeconomic status and medical conditions  
461 on health and healthcare utilization among aging Ghanaians. *BMC public health*  
462 2015;15:276. doi: 10.1186/s12889-015-1603-y [published Online First: 2015/04/18]
- 463 4. Thoa NT, Thanh NX, Chuc NT, et al. The impact of economic growth on health care utilization: a  
464 longitudinal study in rural Vietnam. *International journal for equity in health* 2013;12:19.  
465 doi: 10.1186/1475-9276-12-19 [published Online First: 2013/03/19]
- 466 5. Okafor IP, Sekoni AO, Ezeiru SS, et al. Orthodox versus unorthodox care: A qualitative study on  
467 where rural women seek healthcare during pregnancy and childbirth in Southwest,  
468 Nigeria. *Malawi medical journal : the journal of Medical Association of Malawi*  
469 2014;26(2):45-9. [published Online First: 2014/08/27]
- 470 6. Farag TH, Kotloff KL, Levine MM, et al. Seeking care for pediatric diarrheal illness from  
471 traditional healers in Bamako, Mali. *The American journal of tropical medicine and hygiene*  
472 2013;89(1 Suppl):21-8. doi: 10.4269/ajtmh.12-0753 [published Online First: 2013/05/01]
- 473 7. Akullian A, Ng'eno E, Matheson AI, et al. Environmental Transmission of Typhoid Fever in an  
474 Urban Slum. *PLoS Negl Trop Dis* 2015;9(12):e0004212. doi: 10.1371/journal.pntd.0004212  
475 [published Online First: 2015/12/04]
- 476 8. Steele AD, Hay Burgess DC, Diaz Z, et al. Challenges and Opportunities for Typhoid Fever  
477 Control: A Call for Coordinated Action. *Clinical infectious diseases : an official publication*  
478 *of the Infectious Diseases Society of America* 2016;62 Suppl 1:S4-8. doi:  
479 10.1093/cid/civ976 [published Online First: 2016/03/05]
- 480 9. Tran HH, Bjune G, Nguyen BM, et al. Risk factors associated with typhoid fever in Son La  
481 province, northern Vietnam. *Transactions of the Royal Society of Tropical Medicine and*  
482 *Hygiene* 2005;99(11):819-26. doi: 10.1016/j.trstmh.2005.05.007 [published Online First:  
483 2005/08/16]
- 484 10. Rweyemamu M, Kambarage D, Karimuribo E, et al. Development of a One Health National  
485 Capacity in Africa : the Southern African Centre for Infectious Disease Surveillance  
486 (SACIDS) One Health Virtual Centre Model. *Current topics in microbiology and*  
487 *immunology* 2013;366:73-91. doi: 10.1007/82\_2012\_244 [published Online First:  
488 2012/07/24]
- 489 11. Slayton RB, Date KA, Mintz ED. Vaccination for typhoid fever in sub-Saharan Africa. *Human*  
490 *vaccines & immunotherapeutics* 2013;9(4):903-6. doi: 10.4161/hv.23007 [published Online  
491 First: 2013/04/09]
- 492 12. Sharma PK, Ramakrishnan R, Hutin Y, et al. Risk factors for typhoid in Darjeeling, West Bengal,  
493 India: evidence for practical action. *Tropical medicine & international health : TM & IH*  
494 2009;14(6):696-702. doi: 10.1111/j.1365-3156.2009.02283.x [published Online First:  
495 2009/04/28]
- 496 13. Eguale T, Gebreyes WA, Asrat D, et al. Non-typhoidal Salmonella serotypes, antimicrobial  
497 resistance and co-infection with parasites among patients with diarrhea and other

- 1  
2  
3  
4 498 gastrointestinal complaints in Addis Ababa, Ethiopia. *BMC infectious diseases* 2015;15:497.  
5 499 doi: 10.1186/s12879-015-1235-y [published Online First: 2015/11/06]  
6  
7 500 14. Paudyal N, Anihouvi V, Hounhouigan J, et al. Prevalence of foodborne pathogens in food from  
8 501 selected African countries - A meta-analysis. *International journal of food microbiology*  
9 502 2017;249:35-43. doi: 10.1016/j.ijfoodmicro.2017.03.002 [published Online First: 2017/03/09]  
10  
11 503 15. Panzner U, Pak GD, Aaby P, et al. Utilization of Healthcare in the Typhoid Fever Surveillance in  
12 504 Africa Program. *Clinical infectious diseases : an official publication of the Infectious*  
13 505 *Diseases Society of America* 2016;62 Suppl 1:S56-68. doi: 10.1093/cid/civ891  
14  
15 506 16. von Kalckreuth V, Konings F, Aaby P, et al. The Typhoid Fever Surveillance in Africa Program  
16 507 (TSAP): Clinical, Diagnostic, and Epidemiological Methodologies. *Clinical infectious diseases*  
17 508 *: an official publication of the Infectious Diseases Society of America* 2016;62 Suppl 1:S9-  
18 509 S16. doi: 10.1093/cid/civ693  
19  
20 510 17. Park SE, Toy T, Adu-Sarkodie Y, et al. The Severe Typhoid in Africa Program: a multicentre  
21 511 population-based surveillance program with a nested case-control and cohort study.  
22 512 under submission  
23  
24 513 18. WHO. WHO vaccine-preventable diseases: monitoring system. 2017 global summary 2017  
25 514 [Available from: [http://apps.who.int/immunization\\_monitoring/globalsummary/schedules/](http://apps.who.int/immunization_monitoring/globalsummary/schedules/)  
26 515 accessed December 17 2017.  
27  
28 516 19. WHO. WHO recommendations for routine immunization - summary tables, 2017.  
29  
30 517 20. Fleiss JL, Levin, B., Paik, M.C. Statistical Methods for Rates and Proportions. 3rd ed. New York:  
31 518 John. Wiley & Sons 2003.  
32  
33 519 21. Henderson RH, Sundaresan T. Cluster sampling to assess immunization coverage: a review of  
34 520 experience with a simplified sampling method. *Bulletin of the World Health Organization*  
35 521 1982;60(2):253-60. [published Online First: 1982/01/01]  
36  
37 522 22. Henderson RH, Davis H, Eddins DL, et al. Assessment of vaccination coverage, vaccination scar  
38 523 rates, and smallpox scarring in five areas of West Africa. *Bulletin of the World Health*  
39 524 *Organization* 1973;48(2):183-94. [published Online First: 1973/01/01]  
40  
41 525 23. Newcombe RG. Two-sided confidence intervals for the single proportion: comparison of seven  
42 526 methods. *Statistics in medicine* 1998;17(8):857-72. [published Online First: 1998/05/22]  
43  
44 527 24. Katz J, Zeger SL. Estimation of design effects in cluster surveys. *Ann Epidemiol* 1994;4(4):295-  
45 528 301.  
46  
47 529 25. Bostoen K, Chalabi Z. Optimization of household survey sampling without sample frames. *Int J*  
48 530 *Epidemiol* 2006;35(3):751-5. doi: 10.1093/ije/dyl019  
49  
50 531 26. Panzner U, Ali M, Meyer CG, et al. Geospatial sampling frames for household-based studies:  
51 532 Lessons learned from a multi-country surveillance network in Senegal, South Africa and  
52 533 Sudan. 2017 (submitted)  
53  
54 534 27. Lohr SL. Sampling: Design and Analysis. 2nd edition ed. Pacific Grove, CA: Duxbury Press 2010.  
55  
56  
57  
58  
59  
60

- 1  
2  
3  
4 535 28. Lister AJ, Scott CT. Use of space-filling curves to select sample locations in natural resource  
5 536 monitoring studies. *Environ Monit Assess* 2009;149(1-4):71-80. doi: 10.1007/s10661-008-  
6 537 0184-y  
7  
8 538 29. Keating J, MacIntyre K, Mbogo C, et al. A geographic sampling strategy for studying  
9 539 relationships between human activity and malaria vectors in urban Africa. *Am J Trop Med*  
10 540 *Hyg* 2003;68(3):357-65.  
11  
12 541 30. Keating J, Macintyre K, Mbogo CM, et al. Characterization of potential larval habitats for  
13 542 Anopheles mosquitoes in relation to urban land-use in Malindi, Kenya. *Int J Health Geogr*  
14 543 2004;3(1):9. doi: 10.1186/1476-072X-3-9  
15  
16 544 31. ArcGIS. [Available from: [http://pro.arcgis.com/en/pro-app/tool-reference/data-](http://pro.arcgis.com/en/pro-app/tool-reference/data-management/create-random-points.htm)  
17 545 [management/create-random-points.htm](http://pro.arcgis.com/en/pro-app/tool-reference/data-management/create-random-points.htm) accessed October 2017.  
18  
19 546 32. Kondo MC, Bream KD, Barg FK, et al. A random spatial sampling method in a rural developing  
20 547 nation. *BMC public health* 2014;14:338. doi: 10.1186/1471-2458-14-338 [published Online  
21 548 First: 2014/04/11]  
22  
23 549 33. Kasper MR, Blair PJ, Touch S, et al. Infectious etiologies of acute febrile illness among patients  
24 550 seeking health care in south-central Cambodia. *The American journal of tropical medicine*  
25 551 *and hygiene* 2012;86(2):246-53. doi: 10.4269/ajtmh.2012.11-0409 [published Online First:  
26 552 2012/02/04]  
27  
28 553 34. Dewan AM, Corner R, Hashizume M, et al. Typhoid Fever and its association with  
29 554 environmental factors in the Dhaka Metropolitan Area of Bangladesh: a spatial and time-  
30 555 series approach. *PLoS Negl Trop Dis* 2013;7(1):e1998. doi: 10.1371/journal.pntd.0001998  
31 556 [published Online First: 2013/01/30]  
32  
33 557 35. Naeem Khan M, Shafee M, Hussain K, et al. Typhoid fever in paediatric patients in Quetta,  
34 558 Balochistan, Pakistan. *Pakistan journal of medical sciences* 2013;29(4):929-32. [published  
35 559 Online First: 2013/12/20]  
36  
37 560 36. Crump JA, Youssef FG, Luby SP, et al. Estimating the incidence of typhoid fever and other  
38 561 febrile illnesses in developing countries. *Emerging infectious diseases* 2003;9(5):539-44.  
39 562 [published Online First: 2003/05/10]  
40  
41 563 37. Osei-Tutu B, Anto F. Trends of reported foodborne diseases at the Ridge Hospital, Accra,  
42 564 Ghana: a retrospective review of routine data from 2009-2013. *BMC infectious diseases*  
43 565 2016;16:139. doi: 10.1186/s12879-016-1472-8 [published Online First: 2016/03/26]  
44  
45 566 38. (ILO) ILO. International Standard Classification of Occupations ISCO-08, 2012 [Available from:  
46 567 [http://www.ilo.org/wcmsp5/groups/public/---dgreports/---dcomm/---](http://www.ilo.org/wcmsp5/groups/public/---dgreports/---dcomm/---publ/documents/publication/wcms_172572.pdf)  
47 568 [publ/documents/publication/wcms\\_172572.pdf](http://www.ilo.org/wcmsp5/groups/public/---dgreports/---dcomm/---publ/documents/publication/wcms_172572.pdf).  
48  
49  
50 569  
51  
52  
53  
54  
55  
56  
57  
58  
59  
60

**Appendix 1/Supplementary file 1:****Ethic References****Definitions/Terminology (English)****STROBE Statement—Checklist of items that should be included in reports of *cross-sectional studies*****Ethics References**

- [IVI Institutional Review Board \(IRB\), No. 2016-003](#)
- [Institute of Tropical Medicine Antwerp Institutional Review Board, Belgium](#)
- [Universiteit Antwerpen, Comité voor medische Ethiek, Belgium](#)
- [Ministère de la Santé du Burkina Faso – Comité d’Ethique pour la Recherche en Santé, Burkina Faso](#)
- [Comité d’Ethique de l’Ecole de Santé Publique de l’Université de Kinshasa, Democratic Republic of Congo](#)
- [National Research Ethics Review committee \(NRERC\) Ministry of Science and Technology, Federal Democratic Republic of Ethiopia](#)
- [AHRI-ALERT Ethics Review Committee \(AAERC\), Ethiopia](#)
- [Kwame Nkrumah University of Science and Technology, School of Medical Sciences/Komfo Anokye Teaching Hospital, Committee on Human Research, Publication and Ethics, Ghana](#)
- [Ministère de la Santé du Repoblikan’l Madagaskar – Comité d’Ethique](#)
- [University of Ibadan/University College Hospital Ethics Committee, Ibadan, Nigeria](#)

**Definitions/Terminology (English)**

| <b>A</b>                                       |                                                                                                                                                                                                                                                                                         |
|------------------------------------------------|-----------------------------------------------------------------------------------------------------------------------------------------------------------------------------------------------------------------------------------------------------------------------------------------|
| Abdominal pain/<br>Intestinal pain             | Pain (acute/short-lived or chronic/long-lived) that occurs anywhere between the chest and the groin (often referred to as the stomach region/belly).                                                                                                                                    |
| Aches/Pain                                     | A condition of having continuous/prolonged dull pain in a part of the body; the physical feeling, suffering, or discomfort caused by an illness or injury.                                                                                                                              |
| <b>B</b>                                       |                                                                                                                                                                                                                                                                                         |
| Bleeding<br>(internal/external)/<br>Blood loss | The condition of losing blood from the vascular system, either internally into the body (internal bleeding) or externally through a natural orifice or break in the skin (external bleeding); blood escaping from an injured blood vessel.                                              |
| Blood loss/<br>Bleeding                        | The condition of losing blood from the vascular system, either internally into the body (internal bleeding) or externally through a natural orifice or break in the skin (external bleeding); blood escaping from an injured blood vessel.                                              |
| Blood pressure<br>disorders                    | A high/low blood pressure or a blood pressure that shows excessive fluctuation.                                                                                                                                                                                                         |
| <b>C</b>                                       |                                                                                                                                                                                                                                                                                         |
| Chills/Shivering                               | The sensation of coldness that could be accompanied by shivering or shaking of the body and pallor of the skin.                                                                                                                                                                         |
| Cholera                                        | An infectious, sometimes fatal disease of the small intestine caused by the bacterium <i>Vibrio cholerae</i> ; it is spread via the fecal-oral route from the ingestion of contaminated water and food and causes chills, shivering, severe watery diarrhea, vomiting, and dehydration. |
| Confusion/Dizziness/<br>Unconsciousness        | The state of being bewildered or unclear in mind; an abnormal state of response to stimuli in the environment; faint, wooziness, weakness, unsteadiness or a tendency to fall; the interruption of the awareness of oneself and one's surroundings.                                     |
| Convulsion                                     | The sudden, violent, irregular movement of a limb/part of the body or of the entire body which is caused by involuntary contraction of muscles.                                                                                                                                         |
| Cough                                          | The condition of expelling air from the lungs suddenly/rapidly and with a harsh noise; often involuntarily in order to clear the lung airways of fluids/mucus/other material.                                                                                                           |
| <b>D</b>                                       |                                                                                                                                                                                                                                                                                         |

|    |                                      |                                                                                                                                                                                                                                                                                                                                                                                                                                                                                                                                                                                                                                    |
|----|--------------------------------------|------------------------------------------------------------------------------------------------------------------------------------------------------------------------------------------------------------------------------------------------------------------------------------------------------------------------------------------------------------------------------------------------------------------------------------------------------------------------------------------------------------------------------------------------------------------------------------------------------------------------------------|
| 1  | Dehydration                          | A condition of excessive loss of water/moisture from the body.                                                                                                                                                                                                                                                                                                                                                                                                                                                                                                                                                                     |
| 2  | Diarrhea                             | A condition of passing feces from the body very frequently and in a liquid rather than solid form.                                                                                                                                                                                                                                                                                                                                                                                                                                                                                                                                 |
| 3  | Diphtheria                           | A highly contagious, sometimes fatal disease caused by the bacterium <i>Corynebacterium diphtheriae</i> . It is spread from person-to-person, through the air or contaminated objects and affects the upper respiratory tract. Common symptoms are sore throat, swollen glands/ lymph nodes, malaise, fever/chills, a membranous substance/thick gray material that forms in the throat/tonsils and makes it difficult to breathe/ rapid breathing ("barking cough") and swallow. A form of diphtheria that involves the skin, eyes, or genitals is also reported and is characterized by pain, redness, and swelling of the skin. |
| 4  | Dizziness/Confusion/ Unconsciousness | The state of being bewildered or unclear in mind; an abnormal state of response to stimuli in the environment; faint, wooziness, weakness, unsteadiness or a tendency to fall; the interruption of the awareness of oneself and one's surroundings.                                                                                                                                                                                                                                                                                                                                                                                |
| 5  | <b>E</b>                             |                                                                                                                                                                                                                                                                                                                                                                                                                                                                                                                                                                                                                                    |
| 6  | Edema/Swelling                       | The excess collection of a watery fluid/swelling in the cavities or tissues of the body; it's commonly noticed in the hands/arms/feet/legs; volume increase of tissue.                                                                                                                                                                                                                                                                                                                                                                                                                                                             |
| 7  | Education - formal                   | A systematic, organized education model that is structured and administered according to a given set of laws and norms; formal education institutions are administratively, physically and curricularly organized and require a minimum classroom attendance from students; it involves intermediate and final assessments in order to advance to the next learning stage; it confers degrees and diplomas pursuant to a quite strict set of regulations.                                                                                                                                                                          |
| 8  | <b>F</b>                             |                                                                                                                                                                                                                                                                                                                                                                                                                                                                                                                                                                                                                                    |
| 9  | Fatigue/Malaise/ Weakness            | The state of feeling tired, exhausted, or weak; a general feeling of discomfort, uneasiness, unhealthiness, or unhappiness.                                                                                                                                                                                                                                                                                                                                                                                                                                                                                                        |
| 10 | Fever, any                           | An abnormally high body temperature (usually above 38°C).                                                                                                                                                                                                                                                                                                                                                                                                                                                                                                                                                                          |
| 11 | Fever <3 days                        | An abnormally high body temperature (usually above 38°C) that appears continuously for less than 3 days.                                                                                                                                                                                                                                                                                                                                                                                                                                                                                                                           |
| 12 | Fever >3 days                        | An abnormally high body temperature (usually above 38°C) that lasts longer than 3 days and appears continuously.                                                                                                                                                                                                                                                                                                                                                                                                                                                                                                                   |
| 13 | <b>G</b>                             |                                                                                                                                                                                                                                                                                                                                                                                                                                                                                                                                                                                                                                    |
| 14 | <b>H</b>                             |                                                                                                                                                                                                                                                                                                                                                                                                                                                                                                                                                                                                                                    |
| 15 | Headache                             | Any kind of pain in any region of the head.                                                                                                                                                                                                                                                                                                                                                                                                                                                                                                                                                                                        |
| 16 | Healthcare - actual                  | Healthcare that is related to specific sign/symptom-associated disease onsets or disease onset dates.                                                                                                                                                                                                                                                                                                                                                                                                                                                                                                                              |
| 17 | Healthcare - general                 | Healthcare that is unrelated to specific sign/symptom-associated disease onsets or disease onset dates.                                                                                                                                                                                                                                                                                                                                                                                                                                                                                                                            |
| 18 | Healthcare facility                  | Places or institutions where healthcare is provided; including hospitals, clinics, healthcare centers, health posts, and specialized care centers.                                                                                                                                                                                                                                                                                                                                                                                                                                                                                 |
| 19 | <i>Haemophilus influenzae</i> type B | A bacterium that causes a range of illnesses and is spread by droplets through coughs and sneezing, and occurs primarily among children <5years of age; common signs are fever, headache, and stiff neck up to sepsis. It can cause ear infections, cellulitis (soft tissue infection), arthritis, upper respiratory infections, pneumonia, meningitis (potential brain damage) and epiglottitis (with airway obstructions).                                                                                                                                                                                                       |
| 20 | Heart disorders                      | Any disorder that affects or is caused by the heart; conditions that involve narrowed/blocked blood vessels that can lead to heart attack, chest pain, or stroke; condition that may affect one's heart muscle, valves, rhythm, or blood pressure.                                                                                                                                                                                                                                                                                                                                                                                 |
| 21 | Hepatitis B                          | An infectious disease caused by the hepatitis B virus (HBV) that affects the liver (acute/chronic liver infection; may result in liver failure, cancer, or cirrhosis). The virus is spread from person-to-person through blood, semen, or other bodily fluids. Common symptoms are fever, malaise/weakness/fatigue, loss of appetite, nausea/ vomiting, abdominal discomfort/pain, dark-colored urine, joint pain and jaundice.                                                                                                                                                                                                    |
| 22 | Hepatitis E                          | An infectious disease caused by the hepatitis E virus (HEV) that affects the liver (only acute liver infection; may result in acute liver failure). The virus is spread via the fecal-oral route through the ingestion of contaminated food and water, infected                                                                                                                                                                                                                                                                                                                                                                    |



|                                    |                                                                                                                                                                                                                                                                                                                                                                                                                                                                                                                                                                                                                                                                                                                                                                     |
|------------------------------------|---------------------------------------------------------------------------------------------------------------------------------------------------------------------------------------------------------------------------------------------------------------------------------------------------------------------------------------------------------------------------------------------------------------------------------------------------------------------------------------------------------------------------------------------------------------------------------------------------------------------------------------------------------------------------------------------------------------------------------------------------------------------|
|                                    | animals (zoonotically) and blood. Common symptoms are fever, malaise, loss of appetite, diarrhea, nausea, abdominal discomfort, dark-colored urine, joint pain and jaundice.                                                                                                                                                                                                                                                                                                                                                                                                                                                                                                                                                                                        |
| HIV/AIDS                           | An infectious disease caused by the human immunodeficiency virus (HIV) that affects/damages the immune system and results in the acquired immunodeficiency syndrome (AIDS), a chronic, potentially life-threatening condition; it is transmitted through infectious body fluids such as blood, semen, and other bodily fluids. Common symptoms of an acute/early infection are fever, fatigue, headache, aches/joint pain, rash, sore throat, swollen glands/lymph nodes, diarrhea, weight loss, oral yeast infection and shingles. The untreated disease progresses to AIDS; symptoms caused by the severely damaged immune system are night sweats, recurring fever, chronic diarrhea, lesions on tongue and in the mouth, fatigue, weight loss, and skin rashes. |
| Household                          | A person or a group of related or unrelated persons that live together in the same dwelling unit, that acknowledge one male or female adult as the head of the household, that share the same housekeeping arrangements, that are considered to constitute one unit, and that provide themselves with food or other essentials for living. A household may be located in a single housing unit (single-story building) or in a set of collective living quarters (multi-story building).                                                                                                                                                                                                                                                                            |
| <b>I</b>                           |                                                                                                                                                                                                                                                                                                                                                                                                                                                                                                                                                                                                                                                                                                                                                                     |
| Income/Wage                        | Money or another form of payment that someone receives periodically in exchange for providing a good or service. It is usually received from a job/occupation.                                                                                                                                                                                                                                                                                                                                                                                                                                                                                                                                                                                                      |
| Influenza                          | An infectious, highly contagious disease of the respiratory tract that is caused by flu viruses; it is spread from person-to-person via infected saliva droplets and contaminated objects. Common symptoms are fever, aches in muscles/arms/legs, chills/sweats, headache, fatigue/weakness, runny nose/nasal congestion, sneezing, sore throat and dry persistent cough.                                                                                                                                                                                                                                                                                                                                                                                           |
| Intestinal pain/<br>Abdominal pain | Pain (acute/short-lived or chronic/long-lived) that occurs anywhere between the chest and the groin (often referred to as the stomach region/belly).                                                                                                                                                                                                                                                                                                                                                                                                                                                                                                                                                                                                                |
| <b>J</b>                           |                                                                                                                                                                                                                                                                                                                                                                                                                                                                                                                                                                                                                                                                                                                                                                     |
| Jaundice                           | A condition of yellowing of the skin/whites of the eyes.                                                                                                                                                                                                                                                                                                                                                                                                                                                                                                                                                                                                                                                                                                            |
| <b>K/L</b>                         |                                                                                                                                                                                                                                                                                                                                                                                                                                                                                                                                                                                                                                                                                                                                                                     |
| <b>M</b>                           |                                                                                                                                                                                                                                                                                                                                                                                                                                                                                                                                                                                                                                                                                                                                                                     |
| Malaise/Fatigue/<br>Weakness       | The state of feeling tired, exhausted, or weak; a general feeling of discomfort, uneasiness, unhealthiness, or unhappiness.                                                                                                                                                                                                                                                                                                                                                                                                                                                                                                                                                                                                                                         |
| Malaria                            | An infectious, sometimes fatal disease caused by a parasite ( <i>Plasmodium</i> spp.) that is transmitted primarily by the bite of infected mosquitoes; infection may also spread from mother-to-child prenatally or during delivery, or through contact with contaminated blood. Common symptoms are recurrent attacks of chills, sweating, high fever, headache, vomiting and diarrhea.                                                                                                                                                                                                                                                                                                                                                                           |
| Measles                            | An infectious, sometimes fatal disease of the respiratory tract (nose/throat) that is caused by a virus that affects mainly children <5years of age; it is spread from person-to-person via infected saliva droplets and contaminated objects. Common symptoms are fever, dry cough, runny nose, inflamed eyes, sore throat, large flat spots on the skin, and white spots in the mouth and on the cheek.                                                                                                                                                                                                                                                                                                                                                           |
| Meningitis                         | A viral/bacterial/fungal, sometimes life-threatening infectious inflammation of the membranes (meninges) surrounding the brain and spinal cord; it is spread from person-to-person via infected saliva droplets and contaminated objects. Common symptoms are high fever, severe headache, nausea/vomiting, confusion, seizures, loss of appetite and thirst, fatigues, sensitivity to light, skin rash and stiff neck.                                                                                                                                                                                                                                                                                                                                             |
| Mumps                              | A viral infectious disease caused by the mumps virus that affects mainly the parotid glands that are situated below and in front of the ears; it is spread from person-to-person via infected saliva droplets and contaminated objects. Common symptoms are fever, swelling of one/both parotid glands, headache, muscle aches, weakness/fatigue, loss of appetite and pain while chewing/swallowing; a known complication may be hearing loss.                                                                                                                                                                                                                                                                                                                     |

| <b>N</b>                                |                                                                                                                                                                                                                                                                                                                                                                                                                                                                                                                                                                                                                                                            |
|-----------------------------------------|------------------------------------------------------------------------------------------------------------------------------------------------------------------------------------------------------------------------------------------------------------------------------------------------------------------------------------------------------------------------------------------------------------------------------------------------------------------------------------------------------------------------------------------------------------------------------------------------------------------------------------------------------------|
| Nausea/Vomiting                         | A feeling of sickness in the stomach with an inclination to vomit; a condition of ejecting part or all of the contents of the stomach, primarily through the mouth.                                                                                                                                                                                                                                                                                                                                                                                                                                                                                        |
| Neighbor                                | A person (related or unrelated) living next door to a household; a neighbor does not live together with members of a household (next door) in the same dwelling unit, does not share the same housekeeping arrangements, food, or other living essentials with members of a household (next door), and does not constitute one unit with members of a household (next door).                                                                                                                                                                                                                                                                               |
| <b>O</b>                                |                                                                                                                                                                                                                                                                                                                                                                                                                                                                                                                                                                                                                                                            |
| Occupation                              | A job, or means of earning a wage/living; often requires the mastery of a complex set of knowledge, tasks, duties and skills acquired through formal education and/or practical experience.                                                                                                                                                                                                                                                                                                                                                                                                                                                                |
| <b>P</b>                                |                                                                                                                                                                                                                                                                                                                                                                                                                                                                                                                                                                                                                                                            |
| Pain/Aches                              | A condition of having continuous/prolonged dull pain in a part of the body; the physical feeling, suffering, or discomfort caused by an illness or injury.                                                                                                                                                                                                                                                                                                                                                                                                                                                                                                 |
| Pertussis                               | Pertussis, also known as whooping cough, is a highly contagious bacterial disease. Symptoms similar to a common cold like runny nose, fever and cough are followed by weeks of severe coughing and a high-pitched whooping sound or gasping when a diseased person breathes in; severe coughing may even be followed by vomiting, breaking of ribs, or extreme fatigue. Infected very young and old people may have little or no cough, or they may have periods of interrupted breathing during which they do not breathe at all. Pertussis is transmitted by the bacterium <i>Bordetella pertussis</i> through coughs and sneezes of an infected person. |
| Pharmacy                                | A place where medicines (prescription or nonprescription) are prepared, preserved, compounded and dispensed.                                                                                                                                                                                                                                                                                                                                                                                                                                                                                                                                               |
| Physician                               | A person skilled/trained in healing; a person educated, clinically experienced, and licensed to practice medicine.                                                                                                                                                                                                                                                                                                                                                                                                                                                                                                                                         |
| Pneumococcus                            | A bacterial infection caused by the bacterium <i>Streptococcus pneumoniae</i> ; a sometimes fatal inflammation of the lungs that often affects immunocompromised people; it is spread from person-to-person via infected saliva droplets and contaminated objects. Common symptoms are fever, chills, cough (with phlegm/pus), chest pain, difficulty in breathing/shortness of breath, fatigue, nausea/vomiting and diarrhea; rare symptoms are sepsis, pleural effusion, and empyema.                                                                                                                                                                    |
| Polio                                   | A viral, highly contagious, sometimes fatal infectious disease caused by the poliovirus; in its most severe form causes paralysis and difficulties in breathing; it is transmitted via the fecal-oral route through ingestion of contaminated water and food, and from person-to-person contact. Common symptoms are fever, sore throat, headache, vomiting, fatigue, back pain/neck pain/stiffness, muscle weakness/aches, meningitis, loss of reflexes, and loose/floppy limbs.                                                                                                                                                                          |
| <b>Q</b>                                |                                                                                                                                                                                                                                                                                                                                                                                                                                                                                                                                                                                                                                                            |
| <b>R</b>                                |                                                                                                                                                                                                                                                                                                                                                                                                                                                                                                                                                                                                                                                            |
| Rapid breathing/<br>Shortness of breath | The condition of abnormally fast breathing; a rate of >20 breaths per minute for adults, >30 breaths per minute for children and >45 breaths per minute for babies.                                                                                                                                                                                                                                                                                                                                                                                                                                                                                        |
| Respondent                              | An adult (at the country-specific legal age of majority) household member who is a decision-maker for the entire household within the study site; thus, this adult person serves as a proxy for all household members. This person may be identified by other members of the same household as the person who is primarily involved in the daily healthcare of household members.                                                                                                                                                                                                                                                                          |
| Rotavirus                               | A viral infectious disease caused by rotavirus that results predominantly in diarrhea among children <5years of age; it spreads through the fecal-oral route from person-to-person contact and contaminated objects. Common symptoms are watery diarrhea, fever, vomiting, abdominal pain and dehydration.                                                                                                                                                                                                                                                                                                                                                 |
| Rubella                                 | A contagious, viral infectious disease caused by the rubella virus; known by its distinctive red rash; it is spread from person-to-person via infected saliva droplets), from mother-to-child prenatally via blood, and contaminated objects. Common                                                                                                                                                                                                                                                                                                                                                                                                       |

|                                                   |                                                                                                                                                                                                                                                                                                                                                                                                                                                                                                                                                                                                                                                                                                                                                                                                                                                |
|---------------------------------------------------|------------------------------------------------------------------------------------------------------------------------------------------------------------------------------------------------------------------------------------------------------------------------------------------------------------------------------------------------------------------------------------------------------------------------------------------------------------------------------------------------------------------------------------------------------------------------------------------------------------------------------------------------------------------------------------------------------------------------------------------------------------------------------------------------------------------------------------------------|
|                                                   | symptoms are mild fever, headache, stuffy/runny nose, inflamed red eyes, enlarged tender lymph nodes at the base of the skull/back of the neck/behind the ears, joint pain and a fine pink rash that moves from the face to the trunk, arms and legs.                                                                                                                                                                                                                                                                                                                                                                                                                                                                                                                                                                                          |
| Runny nose                                        | The condition when the nose (nasal and adjacent tissues and blood vessels) produces extra mucus/excess drainage.                                                                                                                                                                                                                                                                                                                                                                                                                                                                                                                                                                                                                                                                                                                               |
| <b>S</b>                                          |                                                                                                                                                                                                                                                                                                                                                                                                                                                                                                                                                                                                                                                                                                                                                                                                                                                |
| Self-treatment                                    | The medication of oneself or treatment of one's own disease or condition without medical supervision or prescription.                                                                                                                                                                                                                                                                                                                                                                                                                                                                                                                                                                                                                                                                                                                          |
| Severe breathing/<br>Difficulties in<br>breathing | The condition of abnormal breathing that may be accompanied by wheezing, chest pain, chest in-drawing, stridor, swelling in the chest, or cough for instance.                                                                                                                                                                                                                                                                                                                                                                                                                                                                                                                                                                                                                                                                                  |
| Shivering/Chills                                  | The sensation of coldness that could be accompanied by shivering or shaking of the body and pallor of the skin.                                                                                                                                                                                                                                                                                                                                                                                                                                                                                                                                                                                                                                                                                                                                |
| Shortness of breath/<br>Rapid breathing           | The condition of abnormally fast and deep breathing; a rate of >20 breaths per minute for adults, >30 breaths per minute for children and >45 breaths per minute for babies.                                                                                                                                                                                                                                                                                                                                                                                                                                                                                                                                                                                                                                                                   |
| Sneezing                                          | The condition of suddenly forcing air out through nose and mouth with a usual loud noise.                                                                                                                                                                                                                                                                                                                                                                                                                                                                                                                                                                                                                                                                                                                                                      |
| Swelling/Edema                                    | A condition of an excess collection of a watery fluid/swelling in the cavities or tissues of the body; it's commonly noticed in the hands/arms/feet/legs; volume increase of tissue.                                                                                                                                                                                                                                                                                                                                                                                                                                                                                                                                                                                                                                                           |
| <b>T</b>                                          |                                                                                                                                                                                                                                                                                                                                                                                                                                                                                                                                                                                                                                                                                                                                                                                                                                                |
| Tetanus                                           | Tetanus is an infection characterized by muscle spasms which commonly begins in the jaw and progresses to the rest of the body. The spasms usually last for a few minutes only and occur frequently during 3-4 weeks of the illness but can be so severe that they may cause bone fractures or death when they affect the respiratory muscles. Tetanus may be characterized by further symptoms like fever, sweating, headache, difficulties in swallowing, high blood pressure, and an increased heart rate. The disease is caused by an infection with the bacterium <i>Clostridium tetani</i> that is found in soil, saliva, dust and manure. The bacterium enters through a skin injury (e.g. cut, puncture wound) by a contaminated object. It produces toxins that interfere with muscle contractions that result in the typical spasms. |
| Traditional healer                                | A person that aims to maintain health as well as to prevent, diagnose, and improve or treat illnesses by using a sum of knowledge, skills and practices based on theories, beliefs and experiences.                                                                                                                                                                                                                                                                                                                                                                                                                                                                                                                                                                                                                                            |
| Tuberculosis                                      | A contagious, potentially serious infectious disease caused by the bacteria <i>Mycobacterium tuberculosis</i> ; primarily affects the lungs, but can also affect the kidneys and spine/brain; it is transmitted from person-to-person via infected saliva droplets. Common symptoms of active tuberculosis are cough (with or without blood), chest pain, weight loss, fatigue, fever, night sweats, chills and loss of appetite.                                                                                                                                                                                                                                                                                                                                                                                                              |
| Typhoid fever                                     | A bacterial, potentially life-threatening infectious disease caused by <i>Salmonella typhi</i> ; it is transmitted via the fecal-oral route through contaminated food and water, or from person-to-person contact. Common symptoms are high fever, headache, abdominal pain, constipation/diarrhea, and rash. Serious complications (i.e. perforation of the gut) are reported.                                                                                                                                                                                                                                                                                                                                                                                                                                                                |
| <b>U</b>                                          |                                                                                                                                                                                                                                                                                                                                                                                                                                                                                                                                                                                                                                                                                                                                                                                                                                                |
| Unconsciousness/<br>Dizziness/Confusion           | The state of being bewildered or unclear in mind; an abnormal state of response to stimuli in the environment; faint, wooziness, weakness, unsteadiness or a tendency to fall; the interruption of the awareness of oneself and one's surroundings.                                                                                                                                                                                                                                                                                                                                                                                                                                                                                                                                                                                            |
| <b>V</b>                                          |                                                                                                                                                                                                                                                                                                                                                                                                                                                                                                                                                                                                                                                                                                                                                                                                                                                |
| Varicella                                         | A viral, highly contagious infectious disease, commonly known as chickenpox, that primarily affects children and is caused by the varicella-zoster virus; it is spread from person-to-person by contact with infected blisters or saliva droplets. Common symptoms are mild fever, headache, backache, loss of appetite, and vesicular skin eruptions/rash/red spots on the back and chest accompanied by severe itching.                                                                                                                                                                                                                                                                                                                                                                                                                      |

|                                                                                                                                                                                                                                                          |                              |                                                                                                                                                                                                                                                                                                                                                                                                                              |
|----------------------------------------------------------------------------------------------------------------------------------------------------------------------------------------------------------------------------------------------------------|------------------------------|------------------------------------------------------------------------------------------------------------------------------------------------------------------------------------------------------------------------------------------------------------------------------------------------------------------------------------------------------------------------------------------------------------------------------|
| 1<br>2<br>3<br>4<br>5<br>6                                                                                                                                                                                                                               | Visitor                      | A person (related or unrelated) who comes to a household to spend some time with household members; a visitor does not live together with household members in the same dwelling unit, does not share the same housekeeping arrangements, food, or other living essentials with household members, and does not constitute one unit with household members.                                                                  |
| 7<br>8                                                                                                                                                                                                                                                   | Vomiting/Nausea              | A feeling of sickness in the stomach with an inclination to vomit; a condition of ejecting part or all of the contents of the stomach, primarily through the mouth.                                                                                                                                                                                                                                                          |
| 9                                                                                                                                                                                                                                                        | <b>W</b>                     |                                                                                                                                                                                                                                                                                                                                                                                                                              |
| 10<br>11                                                                                                                                                                                                                                                 | Weakness/Malaise/<br>Fatigue | The state of feeling tired, exhausted, or weak; a general feeling of discomfort, uneasiness, unhealthiness, or unhappiness.                                                                                                                                                                                                                                                                                                  |
| 12                                                                                                                                                                                                                                                       | Weight loss                  | The (voluntary or involuntary) decrease in body weight.                                                                                                                                                                                                                                                                                                                                                                      |
| 13<br>14<br>15<br>16<br>17                                                                                                                                                                                                                               | Witness                      | A person who is an adult (at the country-specific legal age of majority), who is independent of the study, who cannot be unfairly influenced by study staff, who attends the informed consent process if the subject or subject's legally acceptable representative is illiterate, and who reads (literate) the informed consent form and any other written information supplied to the subject.                             |
| 18                                                                                                                                                                                                                                                       | <b>X/Y/Z</b>                 |                                                                                                                                                                                                                                                                                                                                                                                                                              |
| 19<br>20<br>21<br>22<br>23<br>24<br>25<br>26<br>27<br>28<br>29<br>30<br>31<br>32<br>33<br>34<br>35<br>36<br>37<br>38<br>39<br>40<br>41<br>42<br>43<br>44<br>45<br>46<br>47<br>48<br>49<br>50<br>51<br>52<br>53<br>54<br>55<br>56<br>57<br>58<br>59<br>60 | Yellow fever                 | An acute infectious, human pathogenic, viral disease that is marked by the sudden onset of symptoms like fever, chills, loss of appetite, nausea, muscle pain, and headache, that typically resolve within a few days or are followed by more serious symptoms such as jaundice, high fever and hemorrhage. The disease is caused by a virus of the genus Flavivirus and is transmitted by the bite of an infected mosquito. |

STROBE Statement—Checklist of items that should be included in reports of *cross-sectional studies*

|                                  | <b>Item No</b> | <b>Recommendation</b>                                                                                                                                                                       |            |
|----------------------------------|----------------|---------------------------------------------------------------------------------------------------------------------------------------------------------------------------------------------|------------|
| <b>Title and abstract</b>        | <u>1</u>       | <u>(a) Indicate the study's design with a commonly used term in the title or the abstract</u>                                                                                               | <u>✓</u>   |
|                                  |                | <u>(b) Provide in the abstract an informative and balanced summary of what was done and what was found</u>                                                                                  | <u>✓</u>   |
| <b>Introduction</b>              |                |                                                                                                                                                                                             |            |
| <u>Background/rationale</u>      | <u>2</u>       | <u>Explain the scientific background and rationale for the investigation being reported</u>                                                                                                 | <u>✓</u>   |
| <u>Objectives</u>                | <u>3</u>       | <u>State specific objectives, including any prespecified hypotheses</u>                                                                                                                     | <u>✓</u>   |
| <b>Methods</b>                   |                |                                                                                                                                                                                             |            |
| <u>Study design</u>              | <u>4</u>       | <u>Present key elements of study design early in the paper</u>                                                                                                                              | <u>✓</u>   |
| <u>Setting</u>                   | <u>5</u>       | <u>Describe the setting, locations, and relevant dates, including periods of recruitment, exposure, follow-up, and data collection</u>                                                      | <u>✓</u>   |
| <u>Participants</u>              | <u>6</u>       | <u>(a) Give the eligibility criteria, and the sources and methods of selection of participants</u>                                                                                          | <u>✓</u>   |
| <u>Variables</u>                 | <u>7</u>       | <u>Clearly define all outcomes, exposures, predictors, potential confounders, and effect modifiers. Give diagnostic criteria, if applicable</u>                                             | <u>✓</u>   |
| <u>Data sources/ measurement</u> | <u>8*</u>      | <u>For each variable of interest, give sources of data and details of methods of assessment (measurement). Describe comparability of assessment methods if there is more than one group</u> | <u>✓</u>   |
| <u>Bias</u>                      | <u>9</u>       | <u>Describe any efforts to address potential sources of bias</u>                                                                                                                            | <u>✓</u>   |
| <u>Study size</u>                | <u>10</u>      | <u>Explain how the study size was arrived at</u>                                                                                                                                            | <u>✓</u>   |
| <u>Quantitative variables</u>    | <u>11</u>      | <u>Explain how quantitative variables were handled in the analyses. If applicable, describe which groupings were chosen and why</u>                                                         | <u>✓</u>   |
| <u>Statistical methods</u>       | <u>12</u>      | <u>(a) Describe all statistical methods, including those used to control for confounding</u>                                                                                                | <u>✓</u>   |
|                                  |                | <u>(b) Describe any methods used to examine subgroups and interactions</u>                                                                                                                  | <u>✓</u>   |
|                                  |                | <u>(c) Explain how missing data were addressed</u>                                                                                                                                          | <u>Not</u> |

1  
2  
3  
4  
5  
6  
7  
8  
9  
10  
11  
12  
13  
14  
15  
16  
17  
18  
19  
20  
21  
22  
23  
24  
25  
26  
27  
28  
29  
30  
31  
32  
33  
34  
35  
36  
37  
38  
39  
40  
41  
42  
43  
44  
45  
46  
47

|                         |            |                                                                                                                                                                                                                     |                       |
|-------------------------|------------|---------------------------------------------------------------------------------------------------------------------------------------------------------------------------------------------------------------------|-----------------------|
|                         |            |                                                                                                                                                                                                                     | <u>applicable</u>     |
|                         |            | <u>(d) If applicable, describe analytical methods taking account of sampling strategy</u>                                                                                                                           | <u>Not applicable</u> |
|                         |            | <u>(e) Describe any sensitivity analyses</u>                                                                                                                                                                        | <u>Not applicable</u> |
| <b>Results</b>          |            |                                                                                                                                                                                                                     |                       |
| <u>Participants</u>     | <u>13*</u> | <u>(a) Report numbers of individuals at each stage of study—eg numbers potentially eligible, examined for eligibility, confirmed eligible, included in the study, completing follow-up, and analysed</u>            | <u>Not applicable</u> |
|                         |            | <u>(b) Give reasons for non-participation at each stage</u>                                                                                                                                                         | <u>Not applicable</u> |
|                         |            | <u>(c) Consider use of a flow diagram</u>                                                                                                                                                                           | <u>Not applicable</u> |
| <u>Descriptive data</u> | <u>14*</u> | <u>(a) Give characteristics of study participants (eg demographic, clinical, social) and information on exposures and potential confounders</u>                                                                     | <u>Not applicable</u> |
|                         |            | <u>(b) Indicate number of participants with missing data for each variable of interest</u>                                                                                                                          | <u>Not applicable</u> |
| <u>Outcome data</u>     | <u>15*</u> | <u>Report numbers of outcome events or summary measures</u>                                                                                                                                                         | <u>Not applicable</u> |
| <u>Main results</u>     | <u>16</u>  | <u>(a) Give unadjusted estimates and, if applicable, confounder-adjusted estimates and their precision (eg, 95% confidence interval). Make clear which confounders were adjusted for and why they were included</u> | <u>Not applicable</u> |
|                         |            | <u>(b) Report category boundaries when continuous variables were categorized</u>                                                                                                                                    | <u>Not applicable</u> |
|                         |            | <u>(c) If relevant, consider translating estimates of relative risk into absolute risk for a meaningful time period</u>                                                                                             | <u>Not applicable</u> |
| <u>Other analyses</u>   | <u>17</u>  | <u>Report other analyses done—eg analyses of subgroups and interactions, and sensitivity analyses</u>                                                                                                               | <u>Not applicable</u> |

1  
2  
3  
4  
5  
6  
7  
8  
9  
10  
11  
12  
13  
14  
15  
16  
17  
18  
19  
20  
21  
22  
23  
24  
25  
26  
27  
28  
29  
30  
31  
32  
33  
34  
35  
36  
37  
38  
39  
40  
41  
42  
43  
44  
45  
46  
47

|                          |           |                                                                                                                                                                                   |                       |
|--------------------------|-----------|-----------------------------------------------------------------------------------------------------------------------------------------------------------------------------------|-----------------------|
| <b>Discussion</b>        |           |                                                                                                                                                                                   |                       |
| <u>Key results</u>       | <u>18</u> | <u>Summarise key results with reference to study objectives</u>                                                                                                                   | <u>Not applicable</u> |
| <u>Limitations</u>       | <u>19</u> | <u>Discuss limitations of the study, taking into account sources of potential bias or imprecision. Discuss both direction and magnitude of any potential bias</u>                 | <u>Not applicable</u> |
| <u>Interpretation</u>    | <u>20</u> | <u>Give a cautious overall interpretation of results considering objectives, limitations, multiplicity of analyses, results from similar studies, and other relevant evidence</u> | <u>Not applicable</u> |
| <u>Generalisability</u>  | <u>21</u> | <u>Discuss the generalisability (external validity) of the study results</u>                                                                                                      | <u>Not applicable</u> |
| <b>Other information</b> |           |                                                                                                                                                                                   |                       |
| <u>Funding</u>           | <u>22</u> | <u>Give the source of funding and the role of the funders for the present study and, if applicable, for the original study on which the present article is based</u>              | <u>✓</u>              |

Site \_\_\_\_ Subarea \_\_\_\_ House number \_\_\_\_

Interviewer ID \_\_\_\_

**Appendix 2/Supplementary file 2: Study forms (English)****FORM 1 – RECORD OF HOUSEHOLD VISITS****Instructions to the interviewer**

- Complete "Form 1 – RECORD OF HOUSEHOLD VISITS" for every household visited.
- Complete "Home/Respondent/Completed" once all survey parts have been completed; if not all data have been collected at the initial and/or a consecutive visit (max. 3 visits), schedule a revisit.
- **Attempt 1:** complete the status of the household visit using given options; for "Not Home", "Home/Non-Respondent" and "Home/Respondent/Unavailable" schedule a revisit; for "Home/Respondent/Refusal" state the reason for refusal and visit a replacement household to the nearest on the right or left side of this household; for ~~and~~ "Non-existing/Non-residential" skip this household and visit a replacement household to the nearest on the right or left side of this household instead.
- **Attempt 2:** complete the status of the household visit using given options; for "Not Home", "Home/Non-Respondent" and "Home/Respondent/Unavailable" schedule a revisit.
- **Attempt 3:** complete the status of the household visit using given options; for "Not Home", "Home/Non-Respondent", "Home/Respondent/Unavailable" skip this household and visit a replacement household to the nearest on the right or left side of this household instead.
- "Site" and "Subarea" must be entered each as a 3-digit, "House number" as a 4-digit, and "Interviewer ID" as a 2-digit code (use lists individually prepared for each site to obtain codes); enter "Date" in the format DD/MM/YY and "Time" in the format HH:MM and circle AM or PM. "Study label" must be a combination of a 3-digit "Site" code, a 3-digit "Subarea" code and a 4-digit "House number" code; the "Interviewer ID" must be entered as a 3-digit code.

|                                |                                   |                                                                                                                                                                                                                                                                                                                                                                                                |                     |
|--------------------------------|-----------------------------------|------------------------------------------------------------------------------------------------------------------------------------------------------------------------------------------------------------------------------------------------------------------------------------------------------------------------------------------------------------------------------------------------|---------------------|
| <b>Attempt 1</b>               | Date ____/____/____<br>(DD/MM/YY) | Time ____/____<br>AM/PM                                                                                                                                                                                                                                                                                                                                                                        | Interviewer ID ____ |
| STATUS                         |                                   | Tick one                                                                                                                                                                                                                                                                                                                                                                                       |                     |
| 1=Not home                     | <input type="radio"/>             | ➔ Schedule revisit (Date/Time)                                                                                                                                                                                                                                                                                                                                                                 |                     |
| 2=Home/Non-Respondent          | <input type="radio"/>             | ➔ Schedule revisit (Date/Time)                                                                                                                                                                                                                                                                                                                                                                 |                     |
| 3=Home/Respondent/Unavailable  | <input type="radio"/>             | ➔ Schedule revisit (Date/Time)                                                                                                                                                                                                                                                                                                                                                                 |                     |
| 4=Home/Respondent/Completed    | <input type="radio"/>             |                                                                                                                                                                                                                                                                                                                                                                                                |                     |
| 5=Home/Respondent/Refusal      | <input type="radio"/>             | Record the reason(s) for refusal; tick all that applies<br><input type="radio"/> 1=No time to answer questions<br><input type="radio"/> 2=Don't want to participate/answer questions<br><input type="radio"/> 3=Other _____<br><input type="radio"/> 98=No response <input type="radio"/> 99=Don't know<br>➔ Visit a replacement household to the nearest right or left side of this household |                     |
| 6=Non-existing/Non-residential | <input type="radio"/>             | ➔ Visit a replacement household to the nearest right or left side of this household                                                                                                                                                                                                                                                                                                            |                     |
| <b>Attempt 2</b>               | Date ____/____/____<br>(DD/MM/YY) | Time ____/____<br>AM/PM                                                                                                                                                                                                                                                                                                                                                                        | Interviewer ID ____ |
| STATUS                         |                                   | Tick one                                                                                                                                                                                                                                                                                                                                                                                       |                     |
| 1=Not home                     | <input type="radio"/>             | ➔ Schedule revisit (Date/Time)                                                                                                                                                                                                                                                                                                                                                                 |                     |
| 2=Home/Non-Respondent          | <input type="radio"/>             | ➔ Schedule revisit (Date/Time)                                                                                                                                                                                                                                                                                                                                                                 |                     |
| 3=Home/Respondent/Unavailable  | <input type="radio"/>             | ➔ Schedule revisit (Date/Time)                                                                                                                                                                                                                                                                                                                                                                 |                     |



Site \_\_\_\_\_ Subarea \_\_\_\_\_ House number \_\_\_\_\_ Interviewer ID \_\_\_\_\_

|                                |                                   |                         |                                                                                                                                                                                                                                                                                                                                                                                                |
|--------------------------------|-----------------------------------|-------------------------|------------------------------------------------------------------------------------------------------------------------------------------------------------------------------------------------------------------------------------------------------------------------------------------------------------------------------------------------------------------------------------------------|
| 4=Home/Respondent/Completed    |                                   | <input type="radio"/>   |                                                                                                                                                                                                                                                                                                                                                                                                |
| 5=Home/Respondent/Refusal      |                                   | <input type="radio"/>   | Record the reason(s) for refusal; tick all that applies<br><input type="radio"/> 1=No time to answer questions<br><input type="radio"/> 2=Don't want to participate/answer questions<br><input type="radio"/> 3=Other _____<br><input type="radio"/> 98=No response <input type="radio"/> 99=Don't know<br>➔ Visit a replacement household to the nearest right or left side of this household |
| 6=Non-existing/Non-residential |                                   | <input type="radio"/>   | ➔ Visit a replacement household to the nearest right or left side of this household                                                                                                                                                                                                                                                                                                            |
| <b>Attempt 3</b>               | Date ____/____/____<br>(DD/MM/YY) | Time ____/____<br>AM/PM | Interviewer ID ____                                                                                                                                                                                                                                                                                                                                                                            |
| STATUS                         |                                   | Tick one                |                                                                                                                                                                                                                                                                                                                                                                                                |
| 1=Not home                     |                                   | <input type="radio"/>   | ➔ Visit a replacement household to the nearest right or left side of this household                                                                                                                                                                                                                                                                                                            |
| 2=Home/Non-Respondent          |                                   | <input type="radio"/>   | ➔ Visit a replacement household to the nearest right or left side of this household                                                                                                                                                                                                                                                                                                            |
| 3=Home/Respondent/Unavailable  |                                   | <input type="radio"/>   | ➔ Visit a replacement household to the nearest right or left side of this household                                                                                                                                                                                                                                                                                                            |
| 4=Home/Respondent/Completed    |                                   | <input type="radio"/>   |                                                                                                                                                                                                                                                                                                                                                                                                |
| 5=Home/Respondent/Refusal      |                                   | <input type="radio"/>   | Record the reason(s) for refusal; tick all that applies<br><input type="radio"/> 1=No time to answer questions<br><input type="radio"/> 2=Don't want to participate/answer questions<br><input type="radio"/> 3=Other _____<br><input type="radio"/> 98=No response <input type="radio"/> 99=Don't know<br>➔ Visit a replacement household to the nearest right or left side of this household |
| 6=Non-existing/Non-residential |                                   | <input type="radio"/>   | ➔ Visit a replacement household to the nearest right or left side of this household                                                                                                                                                                                                                                                                                                            |

Site \_\_\_\_ Subarea \_\_\_\_ House number \_\_\_\_

Interviewer ID \_\_\_\_

**FORM 2 – CONSENT FORM**

Healthcare assessment in [add study site and -country]

**Instructions to the interviewer**

- Read "Form 2 – CONSENT FORM" to the respondent/ask the respondent to carefully read through "Form 2 – CONSENT FORM" if preferred.
- The respondent as defined for this investigation is an adult (at the country-specific legal age of majority) household member and decision-maker with respect to daily healthcare/healthcare utilization for the entire household and its members; it must not be e.g. a neighbour or a visitor.
- Assure that the respondent has fully understood the purpose, procedures, risks and benefits of this study prior to obtaining the respondent's consent to participate.
- The respondent must sign "Form 2 – CONSENT FORM"; if the respondent is unable to sign/illiterate, a thumbprint will serve in place of a signature and a study-independent literate adult witness (e.g. member of same household/neighbour) will sign "Form 2 – CONSENT FORM".
- Collect data about all household members regardless of whether all household members are present at the time of the interview; collecting and recording data only about individuals present at the time of the interview will result in biased data.
- Complete "Form 2 – CONSENT FORM" once for every household consented/enrolled in the study.
- Explain to the respondent that it is anticipated to revisit every household during a 2-year period; the study team will obtain a new consent for participation during each visit.
- "Site" and "Subarea" must be entered each as a 3-digit, "House number" as a 4-digit, "Interviewer ID" as a 2-digit code (use lists individually prepared for each site to obtain codes), and "Date" in the format DD/MM/YYYY. "Study label" must be a combination of a 3-digit "Site" code, a 3-digit "Subarea" code and a 4-digit "House number" code; the "Interviewer ID" must be entered as a 3-digit code.

**Study principal- and co-investigators**

[add names of study principal- and co-investigators and respective affiliations]

**Introduction**

The International Vaccine Institute (IVI) and the [add affiliation(s) of local investigators] are working together to look into health problems and healthcare seeking behaviour in your community [add study site and -country], including the socio-economic status, hygiene and sanitation behaviour, and the vaccination status among children. We would like to better understand where you, your family and your neighbours seek healthcare in case of medical conditions associated with fever/hot body and other signs & symptoms. This information will help us to find out how common fever-related and other conditions are, provide a better picture of influencing factors involved in disease transmission and infection, and to find ways to prevent and treat illnesses in your community. You, the primary decision-maker for daily healthcare/healthcare utilization for this household and its members, are invited to participate because you live in the area where we are conducting this study. This consent form will be read by you/to you and you should take your time to make your decision to accept or decline the participation in the study. Please ask members of the study team to explain any word(s) or information that you do not understand. Further information about this study, including its potential risks, benefits and inconveniences will be explained subsequently. After the study has been fully explained to you and if you agree to participate, you will be asked to sign this consent form on behalf of all household members. If you are unable to sign the form, we will ask you to provide your thumbprint, and a study-independent adult person (member of your household/neighbour) will sign the form as a witness. We will give you a signed and dated copy of the consent form.

**Purpose**

The purpose of this study is to look into health problems and utilization of healthcare in your community [add study site and -country], including the socio-economic status and hygiene and sanitation behaviour. We aim to better understand where you, your family and your neighbours seek healthcare for conditions associated with fever/hot body or other signs & symptoms. This information will help better estimate the burden of illnesses common in your community, and to identify ways to introduce measures to prevent and treat them.

Site \_\_\_\_\_ Subarea \_\_\_\_\_ House number \_\_\_\_\_

Interviewer ID \_\_\_\_\_

### Procedures

We will visit about [add number for study site and -country] households in total in [add study site and -country] and will ask the same questions to each household. Your household was chosen for this study simply by chance. If you agree to participate, we will ask you on behalf of all household members a few questions about your household such as the initials, sex and age of each member. We would like to know some information related to the education and occupation of the household head, and income, possession of household items, the housing itself as well as hygiene and sanitation in the context of personal hygiene, food preparation and handling, water sources and handling, waste disposal, handling of farm and domestic animals as well as farming of this household. We will also ask where members of your household get help if anyone is sick due to fever-related and other conditions and about factors that may influence healthcare seeking behaviour of household members (i.e. travel modalities, availability of health insurance, cultural/ethnographic factors) besides the immunization status of children of this house and the perception of some diseases. Finally, we will measure the geographic location of your house. There are no right or wrong answers. You are free to choose which questions to answer. All in all, it should take about 30-45 minutes to answer all questions. The interview may take a bit longer if there are many members in this household. Also, we will visit your household two times in different seasons (once during the dry season and once towards the end of the rainy season) during the overall study period of about two years to collect data as described in this paragraph of the consent form.

### Participation

You, the primary decision-maker for daily healthcare/healthcare utilization for this household and its members, and members of your household are free to choose to accept or decline to be part of the study. If you do not want to participate, that is ok. If you want to stop your participation at any time, that is ok, and there will be no harm to you or members of your household. So, participation in this study is voluntary, and you are free to refuse to participate in the study or you can withdraw your consent at any time without giving reasons and this will not involve any penalty.

### Risks & Benefits

There are no direct risks for participating in this study. Asking questions about your household may make you or household members feel uncomfortable. Study teams may help providing information on established community healthcare resources for participants that express distress after completing the questions. You can refuse to answer any question at any time. You may take a break or stop participating in this study at any time. There are no direct benefits for being in this study. During visits of your household, our study teams may identify members of your household that should seek healthcare for fever-associated conditions and others. Hence, they may help providing information on established healthcare resources in your community. Indirect benefits are that all information collected will provide exact information on health problems and healthcare utilization for various conditions, including vaccination for young children, the socio-economic status as well as hygiene and sanitation behaviour in your community. This will help to provide a better picture of influencing factors involved in disease transmission and infection, and to estimate the burden of common diseases as well as to find ways to prevent and treat those in your community.

### Costs & Compensation

There are no costs for participants of this study. You and anyone from your household will not be compensated for your participation.

### Confidentiality

All study records and all collected information that identify you and members of your household will be kept confidential. All paper-based files will be locked safely and computerized files will be password-protected; all data files (paper-based/computerized) will be stored for a minimum of five years; these files will be accessible to authorized few study staff only. Your name or any identifier will not be used in any publication or reports from this study. Information that we collect about you and members of your household will only be shared with authorized study members such as authorized study staff and officials from ethics committees.

Site \_\_\_\_\_ Subarea \_\_\_\_\_ House number \_\_\_\_\_

Interviewer ID \_\_\_\_\_

**Contact point for questions**

If you or members of your household have any questions, please ask them now to the study team or at any time later by contacting [add name of local principal- and/or co-investigator, respective affiliations, and phone numbers]. If you have questions as a study participant about your/your household members' rights, you can contact the [add name and contact details of the local ethics committee].

**Statement of consent**

This consent form for participating in the assessment of health behaviour and other population-based factors in [add study site and -country] has been read by me/to me carefully. The purpose, procedures, risks & benefits have been explained to me in detail. I have been allowed to ask questions at any time, and my questions have been answered to my satisfaction by the study team. I have been told whom to contact if I have questions, want to discuss problems or concerns. I have been told that I will be given a signed and dated copy of this consent form. I have been reassured that all information obtained as result of this study will be kept confidential and used only for the purpose of this study and only by participating institutions.

I, the respondent, consent hereby voluntarily to participate in this study. I will follow the directions of the study team and give them my full cooperation. I understand that I have the right to withdraw from the study at any time.

**RESPONDENT**

Name: \_\_\_\_\_  
(given name + middle name (if available) + family name)

Signature: \_\_\_\_\_  
(handwritten depiction of person's name/mark that the person writes on a document as a proof of identity)

Date \_\_\_\_/\_\_\_\_/\_\_\_\_ (DD/MM/YYYY)

Thumbprint

If the respondent is unable to sign/illiterate but agrees to participate, record the respondent's thumb print in the above box, and have an adult study-independent literate witness (e.g. member of the same household or a neighbor) sign below:

**WITNESS**

Name: \_\_\_\_\_  
(given name + middle name (if available) + family name)

Signature: \_\_\_\_\_  
(handwritten depiction of person's name/mark that the person writes on a document as a proof of identity)

Date \_\_\_\_/\_\_\_\_/\_\_\_\_ (DD/MM/YYYY)

I, the interviewer, have read/explained the study to the above named respondent (witness if respondent is illiterate) in a language that the respondent understands well. I am certain that the respondent has understood the information and he/she agrees to be asked some questions.

**INTERVIEWER**

Name: \_\_\_\_\_  
(given name + middle name (if available) + family name)

Signature: \_\_\_\_\_  
(handwritten depiction of person's name/mark that the person writes on a document as a proof of identity)

Date \_\_\_\_/\_\_\_\_/\_\_\_\_ (DD/MM/YYYY)

Site \_\_\_\_\_ Subarea \_\_\_\_\_ House number \_\_\_\_\_

Interviewer ID \_\_\_\_\_

**FORM 3: GENERAL HOUSEHOLD INFORMATION****Instructions to the interviewer**

- Complete this form only if the respondent consented to participate (see “Form 2 – CONSENT FORM”); the respondent as defined for this investigation is an adult (at the country-specific legal age of majority) household member and decision-maker with respect to daily healthcare/healthcare utilization for the entire household and its members; it must not be e.g. a neighbour or a visitor.
- Collect data about all household members regardless of whether all household members are present at the time of the interview; collecting and recording data only about individuals present at the time of the interview will result in biased data.
- A household is/household members are defined as a person or a group of related or unrelated persons that live together in the same dwelling unit, that acknowledge one male or female adult as the head of the household, that share the same housekeeping arrangements, that are considered to constitute one unit, and that provide themselves with food or other essentials for living.
- “Site” and “Subarea” must be entered each as a 3-digit, “House number” as a 4-digit, and “Interviewer ID” as a 2-digit code (use lists individually prepared for each site to obtain codes). “Study label” must be a combination of a 3-digit “Site” code, a 3-digit “Subarea” code and a 4-digit “House number” code; the “Interviewer ID” must be entered as a 3-digit code.

**FORM 3: GENERAL HOUSEHOLD INFORMATION**  
**PART A – DEMOGRAPHIC DATA/GENERAL HOUSEHOLD INFORMATION**

**HOUSE LOCATION****1 Site, subarea and house number**

*Instructions:* Site (=study site) and subarea (=smallest unit of the study site) must be recorded each as a 3-digit, and house number as a 4-digit code; use individually prepared lists to obtain the respective codes.

Site: \_\_\_\_\_ Subarea: \_\_\_\_\_ House number: \_\_\_\_\_

**2 GPS coordinates**

*Instructions:* Take GPS coordinates at the approx. center of the house. Record altitude as a 4-digit number (unit: meter), and latitude/longitude as a 7-digit number (unit: degrees, decimal minutes).

1=Original household                       2=Replacement household (right/left side of original household)

Altitude: \_\_\_\_\_

Latitude: \_\_\_\_\_° \_\_\_\_\_'                      Longitude: \_\_\_\_\_° \_\_\_\_\_'

**RESPONDENT****3 Provide the full name of the respondent.**

*Instructions:* Record given name, middle name (if available) and family name of the respondent.

\_\_\_\_\_

**4 Provide the age of the respondent.**

*Instruction:* Recorded as a 3-digit number (unit: year). \_\_\_\_\_

**5 Provide the sex of the respondent.**

1=Male                       2=Female

**6 What is the respondent's relationship to this household?**

- |                                                                  |                                                                    |
|------------------------------------------------------------------|--------------------------------------------------------------------|
| <input type="radio"/> 1=Household head                           | <input type="radio"/> 7=Spouse of household head                   |
| <input type="radio"/> 2=Son/daughter of household head           | <input type="radio"/> 8=Spouse of son/daughter of household head   |
| <input type="radio"/> 3=Brother/sister of household head         | <input type="radio"/> 9=Spouse of brother/sister of household head |
| <input type="radio"/> 4=Mother/father of household head          | <input type="radio"/> 10=Mother/father in law of household head    |
| <input type="radio"/> 5=Granddaughter/grandson of household head | <input type="radio"/> 11=Niece/nephew of household head            |
| <input type="radio"/> 6=Other, specify _____                     | <input type="radio"/> 98=No response                               |

Site \_\_\_\_\_ Subarea \_\_\_\_\_ House number \_\_\_\_\_

Interviewer ID \_\_\_\_\_

**HOUSEHOLD MEMBERS****7 How many household members are living in this house in total (at the day of visit)?***Instruction:* Recorded as a 2-digit number.

Total number of household members: \_\_\_\_\_

**8 Record age and sex of each household member.**

*Instructions:* Record the respondent's initials, age and sex at the first position/row of the table. Initials, age and sex of all other household members must be recorded subsequently. The initials of a household member consist of the first three letters of the given name and the first three letters of the family name (a potential middle name is not part of the initials). Record the age of each household member as a 3-digit number (unit: year); if a household member's age is ≤12 months, record the age as 1 year. Please complete an additional form if a household has >20 members.

| Household member identifier | Initials<br>[given name/family name] | Age<br>[year] | Sex               |
|-----------------------------|--------------------------------------|---------------|-------------------|
| 1/Respondent                | _____/____                           | ____          | O1=Male O2=Female |
| 2                           | _____/____                           | ____          | O1=Male O2=Female |
| 3                           | _____/____                           | ____          | O1=Male O2=Female |
| 4                           | _____/____                           | ____          | O1=Male O2=Female |
| 5                           | _____/____                           | ____          | O1=Male O2=Female |
| 6                           | _____/____                           | ____          | O1=Male O2=Female |
| 7                           | _____/____                           | ____          | O1=Male O2=Female |
| 8                           | _____/____                           | ____          | O1=Male O2=Female |
| 9                           | _____/____                           | ____          | O1=Male O2=Female |
| 10                          | _____/____                           | ____          | O1=Male O2=Female |
| 11                          | _____/____                           | ____          | O1=Male O2=Female |
| 12                          | _____/____                           | ____          | O1=Male O2=Female |
| 13                          | _____/____                           | ____          | O1=Male O2=Female |
| 14                          | _____/____                           | ____          | O1=Male O2=Female |
| 15                          | _____/____                           | ____          | O1=Male O2=Female |
| 16                          | _____/____                           | ____          | O1=Male O2=Female |
| 17                          | _____/____                           | ____          | O1=Male O2=Female |
| 18                          | _____/____                           | ____          | O1=Male O2=Female |
| 19                          | _____/____                           | ____          | O1=Male O2=Female |
| 20                          | _____/____                           | ____          | O1=Male O2=Female |

Site \_\_\_\_\_ Subarea \_\_\_\_\_ House number \_\_\_\_\_

Interviewer ID \_\_\_\_\_

**FORM 3: GENERAL HOUSEHOLD INFORMATION  
PART B – SOCIO-ECONOMIC DATA**

**EDUCATION**

- 1 Can the head of household read in [add the official language of the study site/country]?**  
 1=Yes       2=No       99=Don't know       98=No response
- 2 Can the head of household write in [add the official language of the study site/country]?**  
 1=Yes       2=No       99=Don't know       98=No response
- 3 What is the highest completed level of formal school education of the head of household?**  
 1=Primary school       4=Higher than secondary school       99=Don't know  
 2=Middle school       5=NO EDUCATION       98=No response  
 3=Secondary school       6=Other, specify \_\_\_\_\_

**OCCUPATION/INCOME**

**4 What is the main occupation of the household head?**

*Instructions:* Record the status of the day of visit only.

- 1=Group 1: Managers  
(chief executives, senior officials, legislators; administrative and commercial managers; production and specialized services managers; hospitality, retail and other services managers)
- 2=Group 2: Professional  
(science and engineering professionals; health professionals; teaching professionals; business and administration professionals; information and communications technology professionals; legal, social and cultural professionals)
- 3=Group 3: Technicians and Associate Professionals  
(science and engineering associate professionals; health associate professionals; business and administration associate professionals; legal, social, cultural and related associate professionals; information and communications technicians)
- 4=Group 4: Clerical Support Workers  
(general and keyboard clerks; customer services clerks; numerical and material recording clerks; other clerical support workers)
- 5=Group 5: Services and Sales Workers  
(personal services workers; sales workers; personal care workers; protective services workers)
- 6=Group 6: Skilled Agricultural, Forestry, and Fishery Workers  
(market-oriented skilled agricultural workers; animal producers; market-oriented skilled forestry, fishery and hunting workers; subsistence farmers, fishers, hunters and gatherers)
- 7=Group 7: Craft and Related Trades Workers  
(building and related trades workers (excluding electricians); metal, machinery and related trades workers; handicraft and printing workers; electrical and electronics trades workers; food processing, woodworking, garment and other craft and related trades workers)
- 8=Group 8: Plant and Machine Operators, and Assemblers  
(stationary plant and machine operators; assemblers; drivers and mobile plant operators)
- 9=Group 9: Elementary Occupations  
(cleaners and helpers; agricultural, forestry and fishery labourers; labourers in mining, construction, manufacturing and transport; food preparation assistants; street and related sales and services workers; refuse workers and other elementary workers)
- 10=Group 0: Armed Forces Occupations  
(commissioned armed forces officers; non-commissioned armed forces officers; armed forces occupations, other ranks)
- 11=Other, specify \_\_\_\_\_
- 12=NO OCCUPATION       99=Don't know       98=No response

Site \_\_\_\_\_ Subarea \_\_\_\_\_ House number \_\_\_\_\_

Interviewer ID \_\_\_\_\_

**5 What is the average monthly income of the household head based on the occupation stated in question 4 and of other household members?**

*Instruction:* Tick one answer per household head/enter one code per household member if applicable/if income available.

| Head of household                  | Member 1                                   | Member 2                                                | Member 3                            |
|------------------------------------|--------------------------------------------|---------------------------------------------------------|-------------------------------------|
| Code _____                         | Code _____                                 | Code _____                                              | Code _____                          |
| [1] <100USD<br>[2] ≥100 to <150USD | [3] ≥150 to <200USD<br>[4] ≥200 to <250USD | [5] ≥250USD<br>[6] Head of household NO INCOME (see Q4) | [99] Don't know<br>[98] No response |

**6 Which and how much other/additional source(s) of monthly monetary earnings has this household?**

*Instruction:* Tick all that applies; more than one answer is possible.

| Other/additional sources                                                                                                                                                                                                                                                                                                                           | Overall monthly monetary earnings                                                                                                                                                                        |
|----------------------------------------------------------------------------------------------------------------------------------------------------------------------------------------------------------------------------------------------------------------------------------------------------------------------------------------------------|----------------------------------------------------------------------------------------------------------------------------------------------------------------------------------------------------------|
| <input type="radio"/> 1=Social grants<br><input type="radio"/> 2=Insurance (i.e. private, public)<br><input type="radio"/> 3=Loan (i.e. from friends, family, bank)<br><input type="radio"/> 4=Selling (i.e. livestock, crops, furniture, other goods)<br><input type="radio"/> 5=Personal savings<br><input type="radio"/> 6=Other, specify _____ | <input type="radio"/> 1=<100 USD<br><input type="radio"/> 2=≥100 to <150 USD<br><input type="radio"/> 3=≥150 to <200 USD<br><input type="radio"/> 4=≥200 to <250 USD<br><input type="radio"/> 5=≥250 USD |
| <input type="radio"/> 7=NO OTHER/ADDITIONAL SOURCES<br><input type="radio"/> 99=Don't know<br><input type="radio"/> 98=No response                                                                                                                                                                                                                 |                                                                                                                                                                                                          |

**HOUSING/DWELLING**

**7 Is the house owned by the members of this household?**

- 1=Yes       2=No, rented       3=No, supplied (i.e. government, employer)  
 4=No, other, specify \_\_\_\_\_       99=Don't know  
 98=No response

**8 How many room(s)/individual house structure(s) of this household are used for sleeping, living, cooking and bathing?**

*Instruction:* Enter one code per category only.

| Bedroom            | Living room        | Kitchen                             | Bathroom   |
|--------------------|--------------------|-------------------------------------|------------|
| Code _____         | Code _____         | Code _____                          | Code _____ |
| [1] 1-2<br>[2] 3-4 | [3] >4<br>[4] None | [99] Don't know<br>[98] No response |            |

**9 What is the construction material of the floor, the walls and the roof of room(s)/individual house structure(s) of this house?**

*Instruction:* Enter all codes that applies per category; more than one answer per category is possible.

| Floor                            | Walls                | Roof                                      |
|----------------------------------|----------------------|-------------------------------------------|
| Code _____                       | Code _____           | Code _____                                |
| [1] Brick<br>[2] Cement/Concrete | [3] Tiles<br>[4] Mud | [5] Wood<br>[6] Straw/Leaves              |
|                                  |                      | [7] Metal/Tin<br>[8] Other, specify _____ |
|                                  |                      | [99] Don't know<br>[98] No response       |

**10 Do members of this household have access to/utilize electricity in this household?**

- 1=Yes       2=No       99=Don't know       98=No response

**11 Which main source of light have members of this household access to/are utilizing?**

- 1=Electric light/Light bulb(s)       2=Solar light/Solar lamp(s)  
 3=Paraffin lamp(s)/Oil lamp(s)       4=Battery-powered lamp(s)  
 5=Candle(s)       6=NO SOURCE OF LIGHT  
 7=Other, specify \_\_\_\_\_       99=Don't know  
 98=No response



Site \_\_\_\_\_ Subarea \_\_\_\_\_ House number \_\_\_\_\_

Interviewer ID \_\_\_\_\_

**HOUSEHOLD ASSETS****12 Which of the following items do members of this household own?***Instructions:* Tick all that applies; more than one answer is possible; record the quantity of functional items where applicable.

|                                             |                |                            |                                            |                |                            |
|---------------------------------------------|----------------|----------------------------|--------------------------------------------|----------------|----------------------------|
| <input type="radio"/> 1=Radio               | Quantity _____ | <input type="radio"/> None | <input type="radio"/> 11=Tape/CD player    | Quantity _____ | <input type="radio"/> None |
| <input type="radio"/> 2=Television          | Quantity _____ | <input type="radio"/> None | <input type="radio"/> 12=Computer/Laptop   | Quantity _____ | <input type="radio"/> None |
| <input type="radio"/> 3=Internet connection | Quantity _____ | <input type="radio"/> None | <input type="radio"/> 13=Mobile/Cell phone | Quantity _____ | <input type="radio"/> None |
| <input type="radio"/> 4=Car                 | Quantity _____ | <input type="radio"/> None | <input type="radio"/> 14=Truck/Bus         | Quantity _____ | <input type="radio"/> None |
| <input type="radio"/> 5=Motorbike           | Quantity _____ | <input type="radio"/> None | <input type="radio"/> 15=Bicycle           | Quantity _____ | <input type="radio"/> None |
| <input type="radio"/> 6=Oxcart/Donkey       | Quantity _____ | <input type="radio"/> None | <input type="radio"/> 16=Bed               | Quantity _____ | <input type="radio"/> None |
| <input type="radio"/> 7=Mattress            | Quantity _____ | <input type="radio"/> None | <input type="radio"/> 17=Bed net           | Quantity _____ | <input type="radio"/> None |
| <input type="radio"/> 8=Table               | Quantity _____ | <input type="radio"/> None | <input type="radio"/> 18=Chair             | Quantity _____ | <input type="radio"/> None |
| <input type="radio"/> 9=Refrigerator (4°C)  | Quantity _____ | <input type="radio"/> None | <input type="radio"/> 19=Freezer (-20°C)   | Quantity _____ | <input type="radio"/> None |
| <input type="radio"/> 10=Fan                | Quantity _____ | <input type="radio"/> None | <input type="radio"/> 20=Sewing machine    | Quantity _____ | <input type="radio"/> None |

Site \_\_\_\_\_ Subarea \_\_\_\_\_ House number \_\_\_\_\_

Interviewer ID \_\_\_\_\_

**FORM 3: GENERAL HOUSEHOLD INFORMATION**  
**Part C – Hygiene and sanitation**

**TOILET FACILITY**

**1 To what type of toilet facility have members of this household usually access?**

*Instruction: Inside means inside a room/individual house structure/building; outside means outside a room/individual house structure/building.*

- 1=Flush toilet/Water closet (inside)                       8=Composting toilet (outside)  
 2=Flush toilet/Water closet (outside)                       9=NO toilet facility, use a bucket  
 3=Non-flush latrine/pit latrine (inside)                       10=NO toilet facility, dig a hole  
 4=Non-flush latrine/pit latrine (outside)                       11=NO toilet facility, free range/open defecation  
 5=Ventilated Improved Pit Latrine (KVIP, inside)                       12=Other, specify \_\_\_\_\_  
 6=Ventilated Improved Pit Latrine (KVIP, outside)                       99=Don't know  
 7=Composting toilet (inside)                       98=No response

**2 Do members of this household usually utilize the toilet facility stated in question 1?**

- 1=No, members cannot utilize the facility independently (i.e. infants, toddlers)                       6=No, bad condition (i.e. broken, not clean)  
 2=No, members cannot utilize the facility independently (i.e. disabled, long-term/chronically diseased)                       7=YES  
 3=No, members cannot utilize the facility independently (i.e. seniors)                       8=Other, specify \_\_\_\_\_  
 4=No, limited access (i.e. public, shared with other households/community)                       99=Don't know  
 5=No, too far away (i.e. public, shared with other households/community)                       98=No response

**3 Where is the toilet facility stated in question 1 located? With how many other people is it usually shared?**

- 1=On the property of this household (private, not shared)  
 2=On the property of a neighbouring household (private, shared)  
     *Shared*     1=<10 people                       3=25-49 people                       99=Don't know  
                      2=11-24 people                       4=>50 people                       98=No response  
 3=In the community (public, shared)  
     *Shared*     1=<10 people                       3=25-49 people                       99=Don't know  
                      2=11-24 people                       4=>50 people                       98=No response  
 4=Other, specify \_\_\_\_\_                       99=Don't know                       98=No response

**4 How do members of this household that have/don't have access to a toilet facility usually clean their hands directly before and after urination/defection?**

*Instruction: Enter one code per category only.*

| Clean hands before urination/defection            | Clean hands after urination/defection                   |
|---------------------------------------------------|---------------------------------------------------------|
| Code _____                                        | Code _____                                              |
| [1] Wash hands with soap and water                | [6] Don't clean, not needed/not dirty                   |
| [2] Wash hands with water only                    | [7] Don't clean, nothing to clean hands nearby/on hands |
| [3] Rub hands clean with some leaves/straw/ grass | [8] Other, specify _____                                |
| [4] Rub hands clean with some sand                | [99] Don't know                                         |
| [5] Rub hands clean with some cloth/fabric        | [98] No response                                        |

**KITCHEN/FOOD HANDLING**

**5 Do members of this household have a kitchen for cooking/preparing food/meals? Where is it located?**

- 1=Yes, inside kitchen/in a room/individual house structure; on the property of this household (private, not shared)  
 2=Yes, outside kitchen/outside a room/individual house structure/ open air; on the property of this

Site \_\_\_\_\_ Subarea \_\_\_\_\_ House number \_\_\_\_\_

Interviewer ID \_\_\_\_\_

household (private, not shared)

3=Yes, inside kitchen/in a room/individual house structure; on the property of a neighbouring household (private, shared)

4=Yes, outside kitchen/outside a room/individual house structure/ open air; on the property of a neighbouring household (private, shared)

5=NO KITCHEN

6=Other, specify \_\_\_\_\_  99=Don't know  98=No response

**6 What energy source do members of this household usually use for cooking/preparing food/meals?**

1=Electricity  3=Charcoal  5=Animal dung  99=Don't know  
 2=Gas/Kerosene  4=Wood/straw/leaves  6=Other, specify \_\_\_\_\_  98=No response

**7 What cooking spot do members of this household usually use for cooking/preparing food/meals?**

1=Open fire  3=Closed stove with chimney  99=Don't know  
 2=Open stove  4=Other, specify \_\_\_\_\_  98=No response

**8 Where do members of this household usually store fresh/raw food items (e.g. vegetables, lettuce, fruits, dairy products, eggs, meat and fish) and left-over/prepared food/meals?**

*Instruction:* Enter one code per category only. Inside means inside a room/individual house structure/building; outside means outside a room/individual house structure/building.

| Fresh/raw food items (i.e. vegetables, lettuce, fruits, dairy products, eggs, meat and fish)                                                                                                                                                                                                                                                                                                                                                                                                                                                                                                                                                                                                                                                                                             | Left-over/prepared food/meals |
|------------------------------------------------------------------------------------------------------------------------------------------------------------------------------------------------------------------------------------------------------------------------------------------------------------------------------------------------------------------------------------------------------------------------------------------------------------------------------------------------------------------------------------------------------------------------------------------------------------------------------------------------------------------------------------------------------------------------------------------------------------------------------------------|-------------------------------|
| Code _____                                                                                                                                                                                                                                                                                                                                                                                                                                                                                                                                                                                                                                                                                                                                                                               | Code _____                    |
| [1] At room temperature (inside, on the property of this household, private)<br>[2] At room temperature (outside, on the property of this household, private)<br>[3] At room temperature (inside, on the property of a neighboring household, private, shared)<br>[4] At room temperature (outside, on the property of a neighboring household, private, shared)<br>[5] Refrigerator (on the property of this household, private)<br>[6] Refrigerator (on the property of a neighboring household, private, shared)<br>[7] Freezer (on the property of this household, private)<br>[8] Freezer (on the property of a neighboring household, private, shared)<br>[9] Other, specify _____<br>[10] NO STORAGE <input type="radio"/> [99] Don't know <input type="radio"/> [98] No response |                               |

**9 If the answer is "Room temperature" for fresh/raw food items and/or left-over/prepared food/meals in question 8, how long do members of this household usually store them?**

*Instruction:* Enter one code per category only.

| Fresh/raw food items (i.e. vegetables, lettuce, fruits, dairy products, eggs, meat and fish)                                                                                                                                                                      | Left-over/prepared food/meals |
|-------------------------------------------------------------------------------------------------------------------------------------------------------------------------------------------------------------------------------------------------------------------|-------------------------------|
| Code _____                                                                                                                                                                                                                                                        | Code _____                    |
| [1] <1 day <input type="radio"/> [3] 3-4 days <input type="radio"/> [5] Not applicable <input type="radio"/> [99] Don't know <input type="radio"/><br>[2] 1-2 days <input type="radio"/> [4] >4 days <input type="radio"/> [98] No response <input type="radio"/> |                               |

**10 Do members of this household usually cover left-over/prepared food/meals? Do they re-heat/re-cook left-over/prepared food/meals prior to consumption?**

*Instruction:* Enter one code per category only.

| Cover left-over/prepared food/meals                                                                                                     | Re-heat/Re-cook left-over/prepared food/meals |
|-----------------------------------------------------------------------------------------------------------------------------------------|-----------------------------------------------|
| Code _____                                                                                                                              | Code _____                                    |
| [1] Yes <input type="radio"/> [2] No <input type="radio"/> [99] Don't know <input type="radio"/> [98] No response <input type="radio"/> |                                               |

Site \_\_\_\_\_ Subarea \_\_\_\_\_ House number \_\_\_\_\_

Interviewer ID \_\_\_\_\_

**11 Which member(s) of this household usually cook(s)/prepare(s) food/meals for other members of this household?**

*Instructions:* Refer to question 9 of "Form 3 Part A – Demographic data/General household information" and record the initials/identifier(s) of the member.

Household member, record initials/identifier(s) \_\_\_\_\_  99=Don't know  98=No response

**12 How does/do the household member(s) that usually cook(s)/prepare(s) food/meals for other members of this household as stated in question 11 usually prepare(s) herself/himself/themselves before and after the preparation of meals?**

*Instruction:* Enter one code per category only.

| Before the preparation of meals                   | After the preparation of meals                          |
|---------------------------------------------------|---------------------------------------------------------|
| Code _____                                        | Code _____                                              |
| [1] Wash hands with soap and water                | [6] Don't clean, not needed/not dirty                   |
| [2] Wash hands with water only                    | [7] Don't clean, nothing to clean hands nearby/on hands |
| [3] Rub hands clean with some leaves/straw/ grass | [8] Other, specify _____                                |
| [4] Rub hands clean with some sand                | [99] Don't know                                         |
| [5] Rub hands clean with some cloth/fabric        | [98] No response                                        |

**13 How do members of this household usually prepare themselves before and after eating food/meals, including the household member that usually cooks/prepares food/meals as stated in question 11?**

*Instruction:* Enter one code per category only.

| Before the eating of food/meals                   | After the eating of food/meals                          |
|---------------------------------------------------|---------------------------------------------------------|
| Code _____                                        | Code _____                                              |
| [1] Wash hands with soap and water                | [6] Don't clean, not needed/not dirty                   |
| [2] Wash hands with water only                    | [7] Don't clean, nothing to clean hands nearby/on hands |
| [3] Rub hands clean with some leaves/straw/ grass | [8] Other, specify _____                                |
| [4] Rub hands clean with some sand                | [99] Don't know                                         |
| [5] Rub hands clean with some cloth/fabric        | [98] No response                                        |

**14 How do members of this household usually eat their food/meals, including the household member that usually cooks/prepares food/meals as stated in question 11?**

1=With cutlery  3=Other, specify \_\_\_\_\_  99=Don't know  
 2=With fingers  98=No response

**15 Do members of this household usually eat their food/meals from the same pot, including the household member that usually cooks/prepares food/meals as stated in question 11?**

1=Yes  2=No  99=Don't know  98=No response

**16 Where do members of this household usually get their main fresh/raw food items such as vegetables, fruits and grains/cereals, dairy products, eggs, meat and fish?**

*Instruction:* Enter one code per category only.

| Vegetables, fruits, grains/ cereals     | Dairy products                            | Eggs, meat, fish |
|-----------------------------------------|-------------------------------------------|------------------|
| Code _____                              | Code _____                                | Code _____       |
| [1] Self-farming (i.e. back-/courtyard) | [6] Self-farming (i.e. agricultural land) |                  |
| [2] Supermarket/Grocery store           | [7] Butcher                               |                  |
| [3] Friend/Family                       | [8] Other, specify _____                  |                  |
| [4] Open market                         | [99] Don't know                           |                  |
| [5] Street vendor                       | [98] No response                          |                  |

**17 Do members of this household usually consume/eat fresh/raw food items (e.g. vegetables, lettuce, fruits, dairy products, ice cream, eggs, meat and fish)? If so, which ones?**

Site \_\_\_\_\_ Subarea \_\_\_\_\_ House number \_\_\_\_\_ Interviewer ID \_\_\_\_\_

*Instruction:* Tick all that applies; more than one answer is possible.

- 1=Vegetables/Lettuce (cultivated on bush)
- 2=Vegetables/Lettuce (wild harvesting from bush)
- 3=Fruits (cultivated on bush/tree)
- 4=Fruits (wild harvesting from bush/tree)
- 5=Dairy products (i.e. milk, cheese, yoghurt from domesticated milk producing animals), specify \_\_\_\_\_
- 6=Eggs (from domesticated poultry), specify \_\_\_\_\_
- 7=Animal blood (from domesticated animals), specify \_\_\_\_\_
- 8=Beef/Zebu/Buffalo (domesticated), specify \_\_\_\_\_
- 9=Pork (domesticated)
- 10=Sheep (domesticated)
- 11=Meat from non-domesticated animals (i.e. antelope, boar, poultry, rodents, fish), specify \_\_\_\_\_
- 12=NO CONSUMPTION of fresh/raw food items
- 13=Vegetables/Lettuce (cultivated on ground)
- 14=Vegetables/Lettuce (wild harvesting from ground)
- 15=Fruits (cultivated on ground)
- 16=Fruits (wild harvesting from ground)
- 17=Dairy products (i.e. milk, cheese, yoghurt from non-domesticated milk producing animals), specify \_\_\_\_\_
- 18=Eggs (from non-domesticated poultry), specify \_\_\_\_\_
- 19=Animal blood (from non-domesticated animals), specify \_\_\_\_\_
- 20=Poultry (domesticated; i.e. chicken, duck, pigeon, goose, turkey), specify \_\_\_\_\_
- 21=Goat (domesticated)
- 22=Rodents (domesticated), specify \_\_\_\_\_
- 23=Fish/Seafood, specify \_\_\_\_\_
- 24=Ice cream
- 25=Other, specify \_\_\_\_\_
- 99=Don't know     98=No response

**18 Do members of this household consume meals/food items/beverages usually also outside the house? If so, which member(s) of this household and where?**

*Instructions:* Refer to question 9 of "Form 3 Part A – Demographic data/General household information" and record the initials/identifier of the member(s). Enter all codes that apply for the respective household member.

| Member 1<br>Initials/Identifier: _____ | Member 2<br>Initials/Identifier: _____ | Member 3<br>Initials/Identifier: _____         | Member 4<br>Initials/Identifier: _____ |
|----------------------------------------|----------------------------------------|------------------------------------------------|----------------------------------------|
| Code _____                             | Code _____                             | Code _____                                     | Code _____                             |
| [1] Restaurant<br>[2] Fast food chain  | [3] Cafeteria<br>[4] Street vendor     | [5] Other, specify _____<br>[6] Not applicable | [99] Don't know<br>[98] No response    |

**19 Which meals/food items/beverages do the member(s) of this household listed in question 18 usually consume outside the house?**

*Instructions:* Refer to question 9 of "Form 3 Part A – Demographic data/General household information" and record the initials/identifier of the member(s). List up to 5 meals/food items/beverages per household member. You can refer to food items listed in question 17. Skip this question if no household member consumes meals/food items/beverages outside the house as stated in Q18.

| Member 1<br>Initials/Identifier: _____ | Member 2<br>Initials/Identifier: _____ | Member 3<br>Initials/Identifier: _____ | Member 4<br>Initials/Identifier: _____ |
|----------------------------------------|----------------------------------------|----------------------------------------|----------------------------------------|
| 1: _____                               | 1: _____                               | 1: _____                               | 1: _____                               |
| 2: _____                               | 2: _____                               | 2: _____                               | 2: _____                               |
| 3: _____                               | 3: _____                               | 3: _____                               | 3: _____                               |
| 4: _____                               | 4: _____                               | 4: _____                               | 4: _____                               |
| 5: _____                               | 5: _____                               | 5: _____                               | 5: _____                               |

**WATER**

**20 What is the main water supply for members of this household for drinking, cooking/preparing food/meals, bathing, and cleaning (of house/individual house structure(s), clothing/kitchen tools)?**

*Instruction:* Enter one code per category only.

| Drinking                                                        | Cooking    | Bathing    | Cleaning   |
|-----------------------------------------------------------------|------------|------------|------------|
| Code _____                                                      | Code _____ | Code _____ | Code _____ |
| [1] Tap water (inside the house; private)                       |            |            |            |
| [2] Tap water (outside the house i.e. back-/courtyard; private) |            |            |            |

Site \_\_\_\_\_ Subarea \_\_\_\_\_ House number \_\_\_\_\_

Interviewer ID \_\_\_\_\_

- [3] Tap water (outside the house; public/shared)  
 [4] Standpipe/Piped water (inside the house; private)  
 [5] Standpipe/Piped water (outside the house i.e. back-/ courtyard; private)  
 [6] Standpipe/Piped water (outside the house; public/shared)  
 [7] Water truck (public; shared)  
 [8] Surface water (i.e. canal, irrigation canal)  
 [9] Surface water (i.e. lake, pond, river, stream)  
 [10] Spring water  
 [11] Rain water  
 [12] Well/Borehole (open/uncovered/unprotected)  
 [13] Well/Borehole (covered/protected)  
 [14] Bottled water  
 [15] Other, specify \_\_\_\_\_ [99] Don't know [98] No response

**21 Do members of this household usually treat water for drinking, cooking/ preparing food/meals, bathing, and cleaning (of house/individual house structure(s), clothing/ kitchen tools) prior to consumption? How is water usually treated?**

*Instruction:* Enter all codes that applies per category; more than one answer per category is possible.

| Drinking                                          | Cooking                                         | Bathing                                             | Cleaning                         |
|---------------------------------------------------|-------------------------------------------------|-----------------------------------------------------|----------------------------------|
| Code _____                                        | Code _____                                      | Code _____                                          | Code _____                       |
| [1] No, not at all                                | [7] No, only for children of this household     | [8] No, only depending on the season (rainy season) | [9] Yes, boiling                 |
| [2] No, only for sick members of this household   | [10] Yes, solar disinfection                    | [11] Yes, chlorination                              | [99] Don't know [98] No response |
| [3] No, only depending on the season (dry season) | [4] Yes, filtration (i.e. cloth, ceramic, sand) | [5] Yes, sedimentation                              |                                  |
| [4] Yes, filtration (i.e. cloth, ceramic, sand)   | [6] Other, specify _____                        |                                                     |                                  |

**22 Which member(s) of this household usually collect(s) the drinking water as stated in question 20 for other members of this household?**

*Instructions:* Refer to question 9 of "Form 3 Part A – Demographic data/General household information" and record the initials/identifier of the member.

Household member, record initials/identifier(s) \_\_\_\_\_  99=Don't know  98=No response

**23 How do members of this household usually store the drinking water stated in question 20?**

- 1=Water tank (uncovered)  10=Bowl (covered with i.e. cloth/fabric, lid, leaves)  
 2=Water tank (covered with i.e. cloth/fabric, lid, leaves)  11=Wooden pot (uncovered)  
 3=Container (uncovered)  12=Wooden pot (covered with i.e. cloth/fabric, lid, leaves)  
 4=Container (covered with i.e. cloth/fabric, lid, leaves)  13=Skin vessel (i.e. goat, sheep, cattle; uncovered)  
 5=Clay pot (uncovered)  14=Skin vessel (i.e. goat, sheep, cattle; covered with i.e. cloth/fabric, lid, leaves)  
 6=Clay pot (covered with i.e. cloth/fabric, lid, leaves)  15=NOT STORED  
 7=Bucket (uncovered)  16=Other, specify \_\_\_\_\_  
 8=Bucket (covered with i.e. cloth/fabric, lid, leaves)  99=Don't know  
 9=Bowl (uncovered)  98=No response

**24 If members of this household use a shared drinking water supply as stated in question 20, with how many other people is this drinking water supply usually shared?**

- 1=<10 people  3=25-49 people  5=NOT SHARED  99=Don't know  
 2=11-24 people  4=>50 people  98=No response



Site \_\_\_\_\_ Subarea \_\_\_\_\_ House number \_\_\_\_\_

Interviewer ID \_\_\_\_\_

| Farm animals/livestock                                                                     |                                                                | Domestic animals/pets                                        |
|--------------------------------------------------------------------------------------------|----------------------------------------------------------------|--------------------------------------------------------------|
| <input type="radio"/> 1=Cattle                                                             | <input type="radio"/> 9=Camel                                  | <input type="radio"/> 1=Dog                                  |
| <input type="radio"/> 2=Sheep                                                              | <input type="radio"/> 10= Rodents (i.e. rabbit), specify _____ | <input type="radio"/> 2=Rodents (i.e. rabbit), specify _____ |
| <input type="radio"/> 3=Donkey                                                             | <input type="radio"/> 11=Goat                                  | <input type="radio"/> 3=Cat                                  |
| <input type="radio"/> 4=Poultry (i.e. chicken, duck, pigeon, goose, turkey), specify _____ | <input type="radio"/> 12=Horse                                 | <input type="radio"/> 4=NO DOMESTIC ANIMALS/PETS             |
| <input type="radio"/> 5=Zebu                                                               | <input type="radio"/> 13=NO FARM ANIMALS/LIVESTOCK             | <input type="radio"/> 5=Other, specify _____                 |
| <input type="radio"/> 6=Pig                                                                | <input type="radio"/> 14=Other, specify _____                  | <input type="radio"/> 99=Don't know                          |
| <input type="radio"/> 7=Fish                                                               | <input type="radio"/> 99=Don't know                            | <input type="radio"/> 98=No response                         |
| <input type="radio"/> 8=Buffalo                                                            | <input type="radio"/> 98=No response                           |                                                              |

**30 Where do members of this household usually keep farm animals/livestock and domestic animals/pets of this household as stated in question 29?**

*Instruction:* Tick one answer per category only.

| Farm animals/livestock                                                                                                   | Domestic animals/pets                                                                  |
|--------------------------------------------------------------------------------------------------------------------------|----------------------------------------------------------------------------------------|
| <input type="radio"/> 1=Stable/Cage/Water basin on the property of the house (i.e. back-/courtyard)                      | <input type="radio"/> 1=Cage/Chain near the house (i.e. back-/courtyard)               |
| <input type="radio"/> 2=Stable/Cage/Water basin outside the house in the community                                       | <input type="radio"/> 2=Cage/Chain outside the house in the community                  |
| <input type="radio"/> 3=Stable/Cage/Water basin outside the community                                                    | <input type="radio"/> 3=Cage/Chain outside the community (public)                      |
| <input type="radio"/> 4=Free range/Surface water/Spring water on the property of the house (i.e. house, back-/courtyard) | <input type="radio"/> 4=Free range near the house (i.e. in the house, back-/courtyard) |
| <input type="radio"/> 5=Free range/Surface water/Spring water outside the house in the community                         | <input type="radio"/> 5=Free range outside the house in the community                  |
| <input type="radio"/> 6=Free range/Surface water/Spring water outside the community                                      | <input type="radio"/> 6=Free range outside the community                               |
| <input type="radio"/> 7=Not applicable (nowhere/no farm animals/livestock)                                               | <input type="radio"/> 7=Not applicable (nowhere/no domestic animals/pets)              |
| <input type="radio"/> 8=Other, specify _____                                                                             | <input type="radio"/> 8=Other, specify _____                                           |
| <input type="radio"/> 99=Don't know                                                                                      | <input type="radio"/> 99=Don't know                                                    |
| <input type="radio"/> 98=No response                                                                                     | <input type="radio"/> 98=No response                                                   |

**31 What is the extent of the livestock farming that members of this household practice?**

- |                                                                        |                                              |
|------------------------------------------------------------------------|----------------------------------------------|
| <input type="radio"/> 1=Own demand ("backyard farming")                | <input type="radio"/> 4=Other, specify _____ |
| <input type="radio"/> 2=Not applicable (no livestock farming)          | <input type="radio"/> 99=Don't know          |
| <input type="radio"/> 3=Mass/Industrial demand ("mass animal farming") | <input type="radio"/> 98=No response         |

**32 Which water supply do members of this household usually use to water farm animals/livestock and domestic animals/pets of this household as stated in question 29?**

*Instruction:* Enter one code per category only.

| Farm animals/livestock                                                       | Domestic animals/pets |
|------------------------------------------------------------------------------|-----------------------|
| Code _____                                                                   | Code _____            |
| [1] Tap water (inside the house; private)                                    |                       |
| [2] Tap water (outside the house i.e. back-/courtyard; private)              |                       |
| [3] Tap water (outside the house; public/shared)                             |                       |
| [4] Standpipe/Piped water (inside the house; private)                        |                       |
| [5] Standpipe/Piped water (outside the house i.e. back-/ courtyard; private) |                       |
| [6] Standpipe/Piped water (outside the house; public/shared)                 |                       |



Site \_\_\_\_\_ Subarea \_\_\_\_\_ House number \_\_\_\_\_

Interviewer ID \_\_\_\_\_

- [7] Water truck (public; shared)
- [8] Surface water (i.e. canal, irrigation canal)
- [9] Surface water (i.e. lake, pond, river, stream)
- [10] Spring water
- [11] Rain water
- [12] Well/Borehole (open/uncovered/unprotected)
- [13] Well/Borehole (covered/protected)
- [14] Not applicable (no farm animals/livestock; no domestic animals/pets)
- [15] Other, specify \_\_\_\_\_ [99] Don't know [98] No response

**33 Do members of this household usually wash their hands after they fed & watered and cleaned the stable/cage/water basin of the farm animals/livestock and domestic animals/pets of this household as stated in question 29?**

*Instruction:* Enter one code per category only.

| Farm animals/livestock                            | Domestic animals/pets                                                    |
|---------------------------------------------------|--------------------------------------------------------------------------|
| Code _____                                        | Code _____                                                               |
| [1] Wash hands with soap and water                | [7] Don't clean, nothing to clean hands nearby/on hands                  |
| [2] Wash hands with water only                    | [8] Other, specify _____                                                 |
| [3] Rub hands clean with some leaves/straw/ grass | [9] Not applicable (no farm animals/livestock; no domestic animals/pets) |
| [4] Rub hands clean with some sand                | [99] Don't know                                                          |
| [5] Rub hands clean with some cloth/fabric        | [98] No response                                                         |
| [6] Don't clean, not needed/not dirty             |                                                                          |

**CROP FARMING**

**34 What kind of crops do members of this household grow/cultivate?**

*Instruction:* Tick all that applies; more than one answer is possible.

- 1=Coffee
- 2=Rice
- 3=Fruits (cultivated on bush/tree)
- 4=Fruits (cultivated on the ground)
- 5=Vegetables/Lettuce (cultivated on bush/tree)
- 6=Vegetables/Lettuce (cultivated on the ground)
- 7=Grains (i.e. wheat, barley, oat, corn)
- 8=Tea
- 9=Cashew
- 10=Tobacco
- 11=Sugar cane
- 12=Chad/Chat
- 13=Bees/Honey
- 14=Cotton
- 15=NO CROPS
- 16=Other, specify \_\_\_\_\_
- 99=Don't know
- 98=No response

**35 Where do members of this household have the farmland/agricultural land for crop farming?**

- 1=On the property of the house (i.e. back-/courtyard)
- 2=Outside the community
- 3=Other, specify \_\_\_\_\_
- 4=Outside the house in the community
- 5=Not applicable (no crop farming)
- 99=Don't know
- 98=No response

**36 What is the extent of the crop farming that members of this household practice?**

- 1=Own demand ("backyard farming")
- 2=Not applicable (no crop farming)
- 3=Mass/Industrial demand ("mass crop farming")
- 4=Other, specify \_\_\_\_\_
- 99=Don't know
- 98=No response

**37 Do members of this household usually use herbicides, pesticides and fertilizers for the crop farming as stated in question 34?**

*Instruction:* Tick one answer per category only.

| Herbicides                                     | Pesticides                                     | Fertilizers                                     |
|------------------------------------------------|------------------------------------------------|-------------------------------------------------|
| <input type="radio"/> 1=Yes, specify herbicide | <input type="radio"/> 1=Yes, specify pesticide | <input type="radio"/> 1=Yes, specify fertilizer |

Site \_\_\_\_\_ Subarea \_\_\_\_\_ House number \_\_\_\_\_ Interviewer ID \_\_\_\_\_

- 2=Not applicable (no crop farming)
- 3=No use of herbicides
- 99=Don't know
- 98=No response

- 2=Not applicable (no crop farming)
- 3=No use of pesticides
- 99=Don't know
- 98=No response

- 2=Not applicable (no crop farming)
- 3=No use of fertilizers
- 99=Don't know
- 98=No response

**38 Do members of this household usually wash their hands after the fieldwork for the crop farming as stated in question 34?**

- 1=Yes, wash hands with soap and water
- 2=Yes, rub hands clean with some leaves/straw/grass
- 3=Yes, rub hands clean with some cloth/fabric
- 4=Not applicable (no crop farming)
- 5=Yes, wash hands with water only
- 6=Yes, rub hands clean with some sand
- 7=No, don't clean my hands
- 8=Other, specify \_\_\_\_\_
- 99=Don't know
- 98=No response

Site \_\_\_\_\_ Subarea \_\_\_\_\_ House number \_\_\_\_\_

Interviewer ID \_\_\_\_\_

## FORM 4: ASSESSMENT OF OVERALL, AGE- AND SEX-STRATIFIED GENERIC HEALTHCARE UTILIZATION

### Part A – Assessment of *generic* healthcare utilization

#### Instructions to the interviewer

- Complete this form only if the respondent consented to participate (see “Form 2 - CONSENT FORM”); the respondent as defined for this investigation is an adult (at the country-specific legal age of majority) household member and decision-maker with respect to daily healthcare/healthcare utilization for the entire household and its members; it must not be e.g. a neighbour or a visitor.
- Refer to “Form 3 – Part A - GENERAL HOUSEHOLD INFORMATION” as a reference to obtain the total number of household members as well as age and sex of each household member.
- Collect data about all household members regardless of whether all household members are present at the time of the interview; collecting and recording data only about individuals present at the time of the interview will result in biased data.
- A household is/household members are defined as a person or a group of related or unrelated persons that live together in the same dwelling unit, that acknowledge one male or female adult as the head of the household, that share the same housekeeping arrangements, that are considered to constitute one unit, and that provide themselves with food or other essentials for living.
- “Site” and “Subarea” must be entered each as a 3-digit, “House number” as a 4-digit, and “Interviewer ID” as a 2-digit code (use lists individually prepared for each site to obtain codes). “Study label” must be a combination of a 3-digit “Site” code, a 3-digit “Subarea” code and a 4-digit “House number” code; the “Interviewer ID” must be entered as a 3-digit code.
- Abbreviation: HCF=private/public primary/secondary/tertiary healthcare facility.

#### HOUSEHOLD MEMBERS

##### 1 Record the total number of household members of this house (at the day of visit).

*Instructions:* The total number of household members must be recorded as a 2-digit number; see also “Form 3 – Part A - GENERAL HOUSEHOLD INFORMATION”.

Total number of household members: \_\_\_\_\_

##### 2 Record the number of FEMALE household members by each of the following age groups:

*Instructions:* The total number of female household members by age group must be recorded as a 2-digit number; see also “Form 3 – Part A - GENERAL HOUSEHOLD INFORMATION”.

<2years: \_\_\_\_\_ ≥2 to <5years: \_\_\_\_\_ ≥5 to <15years: \_\_\_\_\_ ≥15years: \_\_\_\_\_

##### 3 Record the number of MALE household members by each of the following age groups:

*Instructions:* The total number of male household members by age group must be recorded as a 2-digit number; see also “Form 3 – Part A - GENERAL HOUSEHOLD INFORMATION”.

<2years: \_\_\_\_\_ ≥2 to <5years: \_\_\_\_\_ ≥5 to <15years: \_\_\_\_\_ ≥15years: \_\_\_\_\_

#### HEALTHCARE SEEKING BEHAVIOR

##### 4 Record where female/male household members <2years/≥2 to <5years/≥5 to <15years/≥15years of age usually seek healthcare for the following signs/symptoms. Please rate using a range from 1-4.

#### *Instructions:*

- Complete question 4 separately for female and male household members <2years, ≥2 to <5years, ≥5 to <15years and ≥15years of age and circle the sex and age group Q4 was completed for; skip question 4 if there is no female/male household member <2years/ ≥2 to <5years/ ≥5 to <15years/ ≥15years of age.
- Provide an answer to each healthcare option for each sign/symptom; use range 1-4 for rating (1=1<sup>st</sup> choice; 2=2<sup>nd</sup> choice; 3=3<sup>rd</sup> choice; 4=not chosen); enter a code where applicable by using prepared lists (use lists individually prepared for each site to obtain codes); tick “Don’t know” if applicable.

Site \_\_\_\_\_ Subarea \_\_\_\_\_ House number \_\_\_\_\_

Interviewer ID \_\_\_\_\_

| Sign/Symptom                                   | Healthcare options       |      |                          |      |                          |                          |                          |                          |                          |                       |
|------------------------------------------------|--------------------------|------|--------------------------|------|--------------------------|--------------------------|--------------------------|--------------------------|--------------------------|-----------------------|
|                                                | Study-HCF                |      | Other HCF                |      | Physician                | Pharmacy                 | Traditional healer       | Nowhere Self-treatment   | Nowhere Nothing          | Don't know            |
|                                                | Rate                     | Code | Rate                     | Code | Rate                     | Rate                     | Rate                     | Rate                     | Rate                     | Tick                  |
| <b>1 [A]</b> Fever, any                        | O=1<br>O=2<br>O=3<br>O=4 |      | O=1<br>O=2<br>O=3<br>O=4 |      | O=1<br>O=2<br>O=3<br>O=4 | O=1<br>O=2<br>O=3<br>O=4 | O=1<br>O=2<br>O=3<br>O=4 | O=1<br>O=2<br>O=3<br>O=4 | O=1<br>O=2<br>O=3<br>O=4 | <input type="radio"/> |
| <b>2</b> Fever <3days (continuous)             | O=1<br>O=2<br>O=3<br>O=4 |      | O=1<br>O=2<br>O=3<br>O=4 |      | O=1<br>O=2<br>O=3<br>O=4 | O=1<br>O=2<br>O=3<br>O=4 | O=1<br>O=2<br>O=3<br>O=4 | O=1<br>O=2<br>O=3<br>O=4 | O=1<br>O=2<br>O=3<br>O=4 | <input type="radio"/> |
| <b>3</b> Fever ≥3days (continuous)             | O=1<br>O=2<br>O=3<br>O=4 |      | O=1<br>O=2<br>O=3<br>O=4 |      | O=1<br>O=2<br>O=3<br>O=4 | O=1<br>O=2<br>O=3<br>O=4 | O=1<br>O=2<br>O=3<br>O=4 | O=1<br>O=2<br>O=3<br>O=4 | O=1<br>O=2<br>O=3<br>O=4 | <input type="radio"/> |
| <b>4</b> Chills Shivering                      | O=1<br>O=2<br>O=3<br>O=4 |      | O=1<br>O=2<br>O=3<br>O=4 |      | O=1<br>O=2<br>O=3<br>O=4 | O=1<br>O=2<br>O=3<br>O=4 | O=1<br>O=2<br>O=3<br>O=4 | O=1<br>O=2<br>O=3<br>O=4 | O=1<br>O=2<br>O=3<br>O=4 | <input type="radio"/> |
| <b>5</b> Convulsion                            | O=1<br>O=2<br>O=3<br>O=4 |      | O=1<br>O=2<br>O=3<br>O=4 |      | O=1<br>O=2<br>O=3<br>O=4 | O=1<br>O=2<br>O=3<br>O=4 | O=1<br>O=2<br>O=3<br>O=4 | O=1<br>O=2<br>O=3<br>O=4 | O=1<br>O=2<br>O=3<br>O=4 | <input type="radio"/> |
| <b>6</b> Weight loss                           | O=1<br>O=2<br>O=3<br>O=4 |      | O=1<br>O=2<br>O=3<br>O=4 |      | O=1<br>O=2<br>O=3<br>O=4 | O=1<br>O=2<br>O=3<br>O=4 | O=1<br>O=2<br>O=3<br>O=4 | O=1<br>O=2<br>O=3<br>O=4 | O=1<br>O=2<br>O=3<br>O=4 | <input type="radio"/> |
| <b>7</b> Dehydration                           | O=1<br>O=2<br>O=3<br>O=4 |      | O=1<br>O=2<br>O=3<br>O=4 |      | O=1<br>O=2<br>O=3<br>O=4 | O=1<br>O=2<br>O=3<br>O=4 | O=1<br>O=2<br>O=3<br>O=4 | O=1<br>O=2<br>O=3<br>O=4 | O=1<br>O=2<br>O=3<br>O=4 | <input type="radio"/> |
| <b>8</b> Malaise Weakness/ Fatigue             | O=1<br>O=2<br>O=3<br>O=4 |      | O=1<br>O=2<br>O=3<br>O=4 |      | O=1<br>O=2<br>O=3<br>O=4 | O=1<br>O=2<br>O=3<br>O=4 | O=1<br>O=2<br>O=3<br>O=4 | O=1<br>O=2<br>O=3<br>O=4 | O=1<br>O=2<br>O=3<br>O=4 | <input type="radio"/> |
| <b>9</b> Aches/ Pain (muscle/joint/bone)       | O=1<br>O=2<br>O=3<br>O=4 |      | O=1<br>O=2<br>O=3<br>O=4 |      | O=1<br>O=2<br>O=3<br>O=4 | O=1<br>O=2<br>O=3<br>O=4 | O=1<br>O=2<br>O=3<br>O=4 | O=1<br>O=2<br>O=3<br>O=4 | O=1<br>O=2<br>O=3<br>O=4 | <input type="radio"/> |
| <b>10</b> Headache                             | O=1<br>O=2<br>O=3<br>O=4 |      | O=1<br>O=2<br>O=3<br>O=4 |      | O=1<br>O=2<br>O=3<br>O=4 | O=1<br>O=2<br>O=3<br>O=4 | O=1<br>O=2<br>O=3<br>O=4 | O=1<br>O=2<br>O=3<br>O=4 | O=1<br>O=2<br>O=3<br>O=4 | <input type="radio"/> |
| <b>11</b> Dizziness/ Confusion Unconsciousness | O=1<br>O=2<br>O=3<br>O=4 |      | O=1<br>O=2<br>O=3<br>O=4 |      | O=1<br>O=2<br>O=3<br>O=4 | O=1<br>O=2<br>O=3<br>O=4 | O=1<br>O=2<br>O=3<br>O=4 | O=1<br>O=2<br>O=3<br>O=4 | O=1<br>O=2<br>O=3<br>O=4 | <input type="radio"/> |
| <b>12</b> Blood pressure disorders             | O=1<br>O=2<br>O=3<br>O=4 |      | O=1<br>O=2<br>O=3<br>O=4 |      | O=1<br>O=2<br>O=3<br>O=4 | O=1<br>O=2<br>O=3<br>O=4 | O=1<br>O=2<br>O=3<br>O=4 | O=1<br>O=2<br>O=3<br>O=4 | O=1<br>O=2<br>O=3<br>O=4 | <input type="radio"/> |

Site \_\_\_\_\_ Subarea \_\_\_\_\_ House number \_\_\_\_\_

Interviewer ID \_\_\_\_\_

| Sign/Symptom                                                | Healthcare options       |      |                          |      |                          |                          |                          |                          |                          |            |
|-------------------------------------------------------------|--------------------------|------|--------------------------|------|--------------------------|--------------------------|--------------------------|--------------------------|--------------------------|------------|
|                                                             | Study-HCF                |      | Other HCF                |      | Physician                | Pharmacy                 | Traditional healer       | Nowhere Self-treatment   | Nowhere Nothing          | Don't know |
|                                                             | Rate                     | Code | Rate                     | Code | Rate                     | Rate                     | Rate                     | Rate                     | Rate                     | Code       |
| <b>13</b> Heart disorders                                   | O=1<br>O=2<br>O=3<br>O=4 |      | O=1<br>O=2<br>O=3<br>O=4 |      | O=1<br>O=2<br>O=3<br>O=4 | O=1<br>O=2<br>O=3<br>O=4 | O=1<br>O=2<br>O=3<br>O=4 | O=1<br>O=2<br>O=3<br>O=4 | O=1<br>O=2<br>O=3<br>O=4 | ○          |
| <b>14</b> Nausea Vomitting                                  | O=1<br>O=2<br>O=3<br>O=4 |      | O=1<br>O=2<br>O=3<br>O=4 |      | O=1<br>O=2<br>O=3<br>O=4 | O=1<br>O=2<br>O=3<br>O=4 | O=1<br>O=2<br>O=3<br>O=4 | O=1<br>O=2<br>O=3<br>O=4 | O=1<br>O=2<br>O=3<br>O=4 | ○          |
| <b>15</b> Diarrhea (watery/ bloody/ mucopurulent)           | O=1<br>O=2<br>O=3<br>O=4 |      | O=1<br>O=2<br>O=3<br>O=4 |      | O=1<br>O=2<br>O=3<br>O=4 | O=1<br>O=2<br>O=3<br>O=4 | O=1<br>O=2<br>O=3<br>O=4 | O=1<br>O=2<br>O=3<br>O=4 | O=1<br>O=2<br>O=3<br>O=4 | ○          |
| <b>16</b> Abdominal pain Intestinal pain                    | O=1<br>O=2<br>O=3<br>O=4 |      | O=1<br>O=2<br>O=3<br>O=4 |      | O=1<br>O=2<br>O=3<br>O=4 | O=1<br>O=2<br>O=3<br>O=4 | O=1<br>O=2<br>O=3<br>O=4 | O=1<br>O=2<br>O=3<br>O=4 | O=1<br>O=2<br>O=3<br>O=4 | ○          |
| <b>17</b> Blood loss/ Bleeding (internal)                   | O=1<br>O=2<br>O=3<br>O=4 |      | O=1<br>O=2<br>O=3<br>O=4 |      | O=1<br>O=2<br>O=3<br>O=4 | O=1<br>O=2<br>O=3<br>O=4 | O=1<br>O=2<br>O=3<br>O=4 | O=1<br>O=2<br>O=3<br>O=4 | O=1<br>O=2<br>O=3<br>O=4 | ○          |
| <b>18</b> Blood loss/ Bleeding (external)                   | O=1<br>O=2<br>O=3<br>O=4 |      | O=1<br>O=2<br>O=3<br>O=4 |      | O=1<br>O=2<br>O=3<br>O=4 | O=1<br>O=2<br>O=3<br>O=4 | O=1<br>O=2<br>O=3<br>O=4 | O=1<br>O=2<br>O=3<br>O=4 | O=1<br>O=2<br>O=3<br>O=4 | ○          |
| <b>19</b> Sneezing Runny nose                               | O=1<br>O=2<br>O=3<br>O=4 |      | O=1<br>O=2<br>O=3<br>O=4 |      | O=1<br>O=2<br>O=3<br>O=4 | O=1<br>O=2<br>O=3<br>O=4 | O=1<br>O=2<br>O=3<br>O=4 | O=1<br>O=2<br>O=3<br>O=4 | O=1<br>O=2<br>O=3<br>O=4 | ○          |
| <b>20</b> Cough                                             | O=1<br>O=2<br>O=3<br>O=4 |      | O=1<br>O=2<br>O=3<br>O=4 |      | O=1<br>O=2<br>O=3<br>O=4 | O=1<br>O=2<br>O=3<br>O=4 | O=1<br>O=2<br>O=3<br>O=4 | O=1<br>O=2<br>O=3<br>O=4 | O=1<br>O=2<br>O=3<br>O=4 | ○          |
| <b>21</b> Rapid breathing/ shortness of breath              | O=1<br>O=2<br>O=3<br>O=4 |      | O=1<br>O=2<br>O=3<br>O=4 |      | O=1<br>O=2<br>O=3<br>O=4 | O=1<br>O=2<br>O=3<br>O=4 | O=1<br>O=2<br>O=3<br>O=4 | O=1<br>O=2<br>O=3<br>O=4 | O=1<br>O=2<br>O=3<br>O=4 | ○          |
| <b>22</b> Severe breathing/ Difficulties in breathing       | O=1<br>O=2<br>O=3<br>O=4 |      | O=1<br>O=2<br>O=3<br>O=4 |      | O=1<br>O=2<br>O=3<br>O=4 | O=1<br>O=2<br>O=3<br>O=4 | O=1<br>O=2<br>O=3<br>O=4 | O=1<br>O=2<br>O=3<br>O=4 | O=1<br>O=2<br>O=3<br>O=4 | ○          |
| <b>23</b> Skin inflammation (rashes/ redness/ pus/ itching) | O=1<br>O=2<br>O=3<br>O=4 |      | O=1<br>O=2<br>O=3<br>O=4 |      | O=1<br>O=2<br>O=3<br>O=4 | O=1<br>O=2<br>O=3<br>O=4 | O=1<br>O=2<br>O=3<br>O=4 | O=1<br>O=2<br>O=3<br>O=4 | O=1<br>O=2<br>O=3<br>O=4 | ○          |
| <b>24</b> Swelling/ Edema                                   | O=1<br>O=2<br>O=3<br>O=4 |      | O=1<br>O=2<br>O=3<br>O=4 |      | O=1<br>O=2<br>O=3<br>O=4 | O=1<br>O=2<br>O=3<br>O=4 | O=1<br>O=2<br>O=3<br>O=4 | O=1<br>O=2<br>O=3<br>O=4 | O=1<br>O=2<br>O=3<br>O=4 | ○          |
| <b>25</b> Jaundice                                          | O=1<br>O=2<br>O=3<br>O=4 |      | O=1<br>O=2<br>O=3<br>O=4 |      | O=1<br>O=2<br>O=3<br>O=4 | O=1<br>O=2<br>O=3<br>O=4 | O=1<br>O=2<br>O=3<br>O=4 | O=1<br>O=2<br>O=3<br>O=4 | O=1<br>O=2<br>O=3<br>O=4 | ○          |

Site \_\_\_\_\_ Subarea \_\_\_\_\_ House number \_\_\_\_\_

Interviewer ID \_\_\_\_\_

## FORM 4: ASSESSMENT OF OVERALL, AGE- AND SEX-STRATIFIED GENERIC HEALTHCARE UTILIZATION

### Part B – Healthcare-associated factors/Vaccination/Disease perception

#### TRAVEL HEALTHCARE FACILITY

- 1 In case a healthcare facility (HCF) was rated the 1<sup>st</sup> choice of care in question 4A (fever), what is the main mode of transportation, travel time (depending on mode of transportation), travel cost (depending on mode of transportation) and travel distance (depending on mode of transportation) that is usually taken to get there?**

*Instructions:* Enter one code per category and sex as well as age group only. Skip this question if there is no female/male member <2years/≥2 to <5years/≥5 to <15years/≥15years of age in this household (see also question 2 and 3 of this form PartA). Skip this question if no HCF was rated the 1<sup>st</sup> choice of care in question 4A for female/male member <2years/≥2 to <5years/≥5 to <15years/≥15years of age. Record the travel time as minute(s) [min]/ hour(s) [hr], the total costs in USD, including potential gifts, favours and tips, and the total distance as meter(s) [m]/kilometre(s) [km].

| Female                                                |                |                       |           | Male                     |                |                  |           |
|-------------------------------------------------------|----------------|-----------------------|-----------|--------------------------|----------------|------------------|-----------|
| <2 years                                              | ≥2 to <5 years | ≥5 to <15 years       | ≥15 years | <2 years                 | ≥2 to <5 years | ≥5 to <15 years  | ≥15 years |
| <b>1.1 Transportation mode</b>                        |                |                       |           |                          |                |                  |           |
| Code ____                                             | Code ____      | Code ____             | Code ____ | Code ____                | Code ____      | Code ____        | Code ____ |
| [1] Private transportation (i.e. motorbike, car, bus) |                | [3] Walking           |           | [5] Other, specify _____ |                |                  |           |
| [2] Public transportation (i.e. motorbike, car, bus)  |                | [4] Bicycle           |           | [99] Don't know          |                | [98] No response |           |
| <b>1.2 Travel time</b>                                |                |                       |           |                          |                |                  |           |
| Code ____                                             | Code ____      | Code ____             | Code ____ | Code ____                | Code ____      | Code ____        | Code ____ |
| [1] <30 mins                                          |                | [3] ≥1.0 to <2.0 hrs  |           | [5] ≥3.0 to <4.0 hrs     |                | [99] Don't know  |           |
| [2] ≥30 to <60 mins                                   |                | [4] ≥2.0 to <3.0 hrs  |           | [6] ≥4.0 hrs             |                | [98] No response |           |
| <b>1.3 Travel cost</b>                                |                |                       |           |                          |                |                  |           |
| Code ____                                             | Code ____      | Code ____             | Code ____ | Code ____                | Code ____      | Code ____        | Code ____ |
| [1] <1.0 USD                                          |                | [3] ≥3.0 to <5.0 USD  |           | [5] ≥10.0 USD            |                | [99] Don't know  |           |
| [2] ≥1.0 to <3.0 USD                                  |                | [4] ≥5.0 to <10.0 USD |           | [98] No response         |                |                  |           |
| <b>1.4 Travel distance</b>                            |                |                       |           |                          |                |                  |           |
| Code ____                                             | Code ____      | Code ____             | Code ____ | Code ____                | Code ____      | Code ____        | Code ____ |
| [1] <500 m                                            |                | [3] ≥1.0 to <2.0 km   |           | [5] ≥3.0 to <4.0 km      |                | [99] Don't know  |           |
| [2] ≥500 m to <1.0 km                                 |                | [4] ≥2.0 to <3.0 km   |           | [6] ≥4.0 km              |                | [98] No response |           |

#### INSURANCE

- 2 For which members of this household does the insurance cover health expenses?**

*Instructions:* Enter one code per category. Skip this question if there is no member <2years/≥2 to <5years/≥5 to <15years/≥15years of age in this household (see question 2 and 3 of this form PartA).

| <2 years   | ≥2 to <5 years | ≥5 to <15 years | ≥15 years        |
|------------|----------------|-----------------|------------------|
| Code _____ | Code _____     | Code _____      | Code _____       |
| [1] Yes    | [2] No         | [99] Don't know | [98] No response |

Site \_\_\_\_\_ Subarea \_\_\_\_\_ House number \_\_\_\_\_

Interviewer ID \_\_\_\_\_

### 3 What kind of health expenses are usually covered by the insurance for members of this household?

*Instructions:* Enter one code by category and age group only. Skip this question if there is no member <2years/≥2 to <5years/≥5 to <15years/≥15years of age in this household (see also question 2 and 3 of this form PartA). Skip this question if there is no insurance that covers health expenses for <2years/≥2 to <5years/≥5 to <15years/≥15years of age.

|                                                                                | <2 years   | ≥2 to <5years | ≥5 to <15years  | ≥15years         |
|--------------------------------------------------------------------------------|------------|---------------|-----------------|------------------|
|                                                                                | [1] Yes    | [2] No        | [99] Don't know | [98] No response |
| <b>1</b> Registration                                                          | Code _____ | Code _____    | Code _____      | Code _____       |
| <b>2</b> Consultation/ Doctor's visit                                          | Code _____ | Code _____    | Code _____      | Code _____       |
| <b>3</b> Physical examination - general                                        | Code _____ | Code _____    | Code _____      | Code _____       |
| <b>4</b> Physical examination – specific, specify _____                        | Code _____ | Code _____    | Code _____      | Code _____       |
| <b>5</b> Diagnostics - general laboratory diagnostics                          | Code _____ | Code _____    | Code _____      | Code _____       |
| <b>6</b> Diagnostics - specific laboratory diagnostics, specify _____          | Code _____ | Code _____    | Code _____      | Code _____       |
| <b>7</b> Diagnostics - general imaging                                         | Code _____ | Code _____    | Code _____      | Code _____       |
| <b>8</b> Diagnostics - specific imaging, specify _____                         | Code _____ | Code _____    | Code _____      | Code _____       |
| <b>9</b> Diagnostics - other, specify _____                                    | Code _____ | Code _____    | Code _____      | Code _____       |
| <b>10</b> Treatment - general medication                                       | Code _____ | Code _____    | Code _____      | Code _____       |
| <b>11</b> Treatment - specific medication, specify _____                       | Code _____ | Code _____    | Code _____      | Code _____       |
| <b>12</b> Treatment - other medication, specify _____                          | Code _____ | Code _____    | Code _____      | Code _____       |
| <b>13</b> Treatment - interventions (other than surgery), specify _____        | Code _____ | Code _____    | Code _____      | Code _____       |
| <b>14</b> Treatment Surgery                                                    | Code _____ | Code _____    | Code _____      | Code _____       |
| <b>15</b> Hospitalization <7days                                               | Code _____ | Code _____    | Code _____      | Code _____       |
| <b>16</b> Hospitalization ≥7days                                               | Code _____ | Code _____    | Code _____      | Code _____       |
| <b>17</b> Emergency services                                                   | Code _____ | Code _____    | Code _____      | Code _____       |
| <b>18</b> Antenatal care                                                       | Code _____ | Code _____    | Code _____      | Code _____       |
| <b>19</b> Postnatal care                                                       | Code _____ | Code _____    | Code _____      | Code _____       |
| <b>20</b> Preventive medicine                                                  | Code _____ | Code _____    | Code _____      | Code _____       |
| <b>21</b> Vaccination                                                          | Code _____ | Code _____    | Code _____      | Code _____       |
| <b>22</b> Home healthcare (i.e. elderly, disabled, chronic/long-term diseased) | Code _____ | Code _____    | Code _____      | Code _____       |
| <b>23</b> Supportive therapy (i.e. physiotherapy, ergotherapy, rehabilitation) | Code _____ | Code _____    | Code _____      | Code _____       |

Site \_\_\_\_\_ Subarea \_\_\_\_\_ House number \_\_\_\_\_

Interviewer ID \_\_\_\_\_

**ETHNOGRAPHY****4 To which religion/ethnic group/tribe belong members of this household?**

*Instructions:* Give one answer by age group only. Skip this question if there is no member >2years/≥2 to <5years/≥5 to <15years/≥15years of age in this household (see also question 2 and 3 of this form PartA).

|                             | <2 years                                                                    | ≥2 to <5years                                                               | ≥5 to <15years                                                              | ≥15years                                                                    |
|-----------------------------|-----------------------------------------------------------------------------|-----------------------------------------------------------------------------|-----------------------------------------------------------------------------|-----------------------------------------------------------------------------|
| Religion/Ethnic group/Tribe | _____                                                                       | _____                                                                       | _____                                                                       | _____                                                                       |
|                             | <input type="radio"/> 99=Don't know<br><input type="radio"/> 98=No response | <input type="radio"/> 99=Don't know<br><input type="radio"/> 98=No response | <input type="radio"/> 99=Don't know<br><input type="radio"/> 98=No response | <input type="radio"/> 99=Don't know<br><input type="radio"/> 98=No response |

**5 Does the religion/ethnic group/tribe as stated in question 4 influence the various aspects of utilization of healthcare for members of this household?**

*Instructions:* Enter one code by category and age group only. Skip this question if there is member >2years/≥2 to <5years/≥5 to <15years/≥15years of age in this household (see also question 2 and 3 of this form PartA).

|                                                                                              | <2 years   | ≥2 to <5years | ≥5 to <15years  | ≥15years         |
|----------------------------------------------------------------------------------------------|------------|---------------|-----------------|------------------|
|                                                                                              | [1] Yes    | [2] No        | [99] Don't know | [98] No response |
| <b>1</b> Visiting a healthcare facility (i.e. hospital, health care center, health post)     | Code _____ | Code _____    | Code _____      | Code _____       |
| <b>2</b> Visiting a physician                                                                | Code _____ | Code _____    | Code _____      | Code _____       |
| <b>3</b> Visiting a pharmacy                                                                 | Code _____ | Code _____    | Code _____      | Code _____       |
| <b>4</b> Visiting a traditional healer                                                       | Code _____ | Code _____    | Code _____      | Code _____       |
| <b>5</b> Deciding for self-treatment                                                         | Code _____ | Code _____    | Code _____      | Code _____       |
| <b>6</b> Deciding for non-treatment                                                          | Code _____ | Code _____    | Code _____      | Code _____       |
| <b>7</b> Physical examination – general                                                      | Code _____ | Code _____    | Code _____      | Code _____       |
| <b>8</b> Physical examination – specific, specify _____                                      | Code _____ | Code _____    | Code _____      | Code _____       |
| <b>9</b> Collection of specimen (i.e. blood, urine, stool, smear, swab, cerebrospinal fluid) | Code _____ | Code _____    | Code _____      | Code _____       |
| <b>10</b> Diagnostics – general laboratory diagnostics                                       | Code _____ | Code _____    | Code _____      | Code _____       |
| <b>11</b> Diagnostics – specific laboratory diagnostics, specify _____                       | Code _____ | Code _____    | Code _____      | Code _____       |
| <b>12</b> Diagnostics - general imaging                                                      | Code _____ | Code _____    | Code _____      | Code _____       |
| <b>13</b> Diagnostics - specific imaging, specify _____                                      | Code _____ | Code _____    | Code _____      | Code _____       |
| <b>14</b> Diagnostics - other, specify _____                                                 | Code _____ | Code _____    | Code _____      | Code _____       |
| <b>15</b> Treatment - general medication                                                     | Code _____ | Code _____    | Code _____      | Code _____       |
| <b>16</b> Treatment - specific medication, specify _____                                     | Code _____ | Code _____    | Code _____      | Code _____       |
| <b>17</b> Treatment - other medication, specify _____                                        | Code _____ | Code _____    | Code _____      | Code _____       |



Site \_\_\_\_\_ Subarea \_\_\_\_\_ House number \_\_\_\_\_

Interviewer ID \_\_\_\_\_

|                                                                                |            |            |            |            |
|--------------------------------------------------------------------------------|------------|------------|------------|------------|
| <b>18</b> Treatment - interventions (other than surgery), specify _____        | Code _____ | Code _____ | Code _____ | Code _____ |
| <b>19</b> Treatment - Surgery                                                  | Code _____ | Code _____ | Code _____ | Code _____ |
| <b>20</b> Hospitalization <7days                                               | Code _____ | Code _____ | Code _____ | Code _____ |
| <b>21</b> Hospitalization ≥7days                                               | Code _____ | Code _____ | Code _____ | Code _____ |
| <b>22</b> Emergency services                                                   | Code _____ | Code _____ | Code _____ | Code _____ |
| <b>23</b> Antenatal care                                                       | Code _____ | Code _____ | Code _____ | Code _____ |
| <b>24</b> Postnatal care                                                       | Code _____ | Code _____ | Code _____ | Code _____ |
| <b>25</b> Preventive medicine                                                  | Code _____ | Code _____ | Code _____ | Code _____ |
| <b>26</b> Vaccination                                                          | Code _____ | Code _____ | Code _____ | Code _____ |
| <b>27</b> Home healthcare (i.e. elderly, disabled, chronic/long-term diseased) | Code _____ | Code _____ | Code _____ | Code _____ |
| <b>28</b> Supportive therapy (i.e. physiotherapy, ergotherapy, rehabilitation) | Code _____ | Code _____ | Code _____ | Code _____ |

**VACCINATION**

**6 How were children of this household fed during the first six months of life?**

*Instructions:* Skip this question if there are no male/female children in this household (see also question 2 and 3 of this form PartA).

- 1=Breastfed exclusively
- 2=Breastfed and other feeds, specify \_\_\_\_\_
- 3=Formula and other feeds, specify \_\_\_\_\_
- 4=Breastfed and formula
- 5=Formula exclusively
- 6=Other, specify \_\_\_\_\_
- 99=Don't know
- 98=No response

**7 Which water source was usually used to prepare formula or formula and other feeds as stated in question 6 for children of this household?**

*Instructions:* Skip this question if there are no children in this household (see also question 2 and 3 of this form PartA).

- 1=Tap water (inside the house; private)
- 2=Tap water (outside the house i.e. back-/courtyard; private)
- 3=Tap water (outside the house; public, shared)
- 4=Standpipe/Piped water (inside the house; private)
- 5=Standpipe/Piped water (outside the house i.e. back-/courtyard; private)
- 6=Standpipe/Piped water (outside the house; public, shared)
- 7=Water truck (public; shared)
- 8=Bottled water
- 9=Surface water (i.e. lake, pond, river, stream)
- 10=Surface water (i.e. canal, irrigation canal)
- 11=Spring water
- 12=Rain water
- 13=Well/Borehole (open/uncovered/unprotected)
- 14=Well/Borehole (covered/protected)
- 15=NO FORMULA/OTHER FEEDS PREPARED
- 16=Other, specify \_\_\_\_\_
- 99=Don't know
- 98=No response

**8 Did children of this household receive any vaccines since birth, including the birth vaccines?**

*Instructions:* Enter one code by category and child only. Skip this question if there are no children in this household (see also question 2 and 3 of this form PartA). Refer to question 9 of "Form 3 Part A – Demographic data/General household information" and record the initials/identifier of the member(s).

|                                       |                                       |                                       |                                       |
|---------------------------------------|---------------------------------------|---------------------------------------|---------------------------------------|
| Child 1<br>Initials/Identifier: _____ | Child 2<br>Initials/Identifier: _____ | Child 3<br>Initials/Identifier: _____ | Child 4<br>Initials/Identifier: _____ |
|---------------------------------------|---------------------------------------|---------------------------------------|---------------------------------------|

Site \_\_\_\_\_ Subarea \_\_\_\_\_ House number \_\_\_\_\_

Interviewer ID \_\_\_\_\_

|                                                                                                                                                     |                                       |                              |                  |
|-----------------------------------------------------------------------------------------------------------------------------------------------------|---------------------------------------|------------------------------|------------------|
| [1] YES, vaccinated                                                                                                                                 | [5] No, lack of vaccine               | [9] No, HCF busy             |                  |
| [2] No, caretaker busy                                                                                                                              | [6] No, child too old/young           | [10] No, child sick          |                  |
| [3] No, caretaker decided no need                                                                                                                   | [7] No, caretaker refused/too worried | [11] No, no vaccination card |                  |
| [4] No, unknown where to go                                                                                                                         | [8] No, other, specify _____          | [99] Don't know              | [98] No response |
| <b>8.1 Diphtheria and Tetanus and Pertussis and <i>Haemophilus influenza</i> and Hepatitis B vaccine/DTwPHibHepB</b> (e.g. 6/8, 10/12, 14/16 weeks) |                                       |                              |                  |
| Code _____                                                                                                                                          | Code _____                            | Code _____                   | Code _____       |
| <b>8.2 Tetanus toxoid (TT)</b> (e.g. 1st contact pregnancy, 1, 6, 12/24 months)                                                                     |                                       |                              |                  |
| Code _____                                                                                                                                          | Code _____                            | Code _____                   | Code _____       |
| <b>8.3 Tetanus and diphtheria toxoid (TD)</b> (e.g. 1st contact pregnancy, 1, 6, 12 months)                                                         |                                       |                              |                  |
| Code _____                                                                                                                                          | Code _____                            | Code _____                   | Code _____       |
| <b>8.4 Tuberculosis/BCG</b> (at birth)                                                                                                              |                                       |                              |                  |
| Code _____                                                                                                                                          | Code _____                            | Code _____                   | Code _____       |
| <b>8.5 Rotavirus/RV</b> (e.g. 6/8, 10/12, 16 weeks)                                                                                                 |                                       |                              |                  |
| Code _____                                                                                                                                          | Code _____                            | Code _____                   | Code _____       |
| <b>8.6 Measles/Measles and Rubella (MR)</b> (e.g. 9, 15/18months)                                                                                   |                                       |                              |                  |
| Code _____                                                                                                                                          | Code _____                            | Code _____                   | Code _____       |
| <b>8.7 Polio/OPV</b> (e.g. birth, 6/8, 10/12, 14/16 weeks)                                                                                          |                                       |                              |                  |
| Code _____                                                                                                                                          | Code _____                            | Code _____                   | Code _____       |
| <b>8.8 Pneumococcus/PCV</b> (e.g. 6/8, 10/12, 14/16 weeks)                                                                                          |                                       |                              |                  |
| Code _____                                                                                                                                          | Code _____                            | Code _____                   | Code _____       |
| <b>8.9 Yellow fever (YF)</b> (e.g. 9 months)                                                                                                        |                                       |                              |                  |
| Code _____                                                                                                                                          | Code _____                            | Code _____                   | Code _____       |
| <b>8.10 Other Vaccines</b>                                                                                                                          |                                       |                              |                  |
| Specify, _____                                                                                                                                      | Specify, _____                        | Specify, _____               | Specify, _____   |
| Specify, _____                                                                                                                                      | Specify, _____                        | Specify, _____               | Specify, _____   |
| Specify, _____                                                                                                                                      | Specify, _____                        | Specify, _____               | Specify, _____   |
| Specify, _____                                                                                                                                      | Specify, _____                        | Specify, _____               | Specify, _____   |

Site \_\_\_\_\_ Subarea \_\_\_\_\_ House number \_\_\_\_\_ Interviewer ID \_\_\_\_\_

### **DISEASE PERCEPTION**

#### **9 Knowledge, perception, causes and prevention of common infectious diseases**

| <b>Disease</b>          | <b>9.1 Disease known by household members?</b><br>[1] Yes<br>[2] No<br>[99] Don't know<br>[98] No response | <b>9.2 Perception of disease by household members?</b><br><i>Instruction: Describe briefly if known.</i> | <b>9.3 Causes for disease known by household members?</b><br><i>Instructions: Enter all codes (list A) that apply; more than one answer is possible.</i> | <b>9.4 Measures to prevent disease known by household members?</b><br><i>Instructions: Enter all codes (list B) that apply; more than one answer is possible.</i> | <b>9.5 Measures to prevent disease utilized by household members?</b><br><i>Instructions: Enter all codes (list B) that apply; more than one answer is possible.</i> |
|-------------------------|------------------------------------------------------------------------------------------------------------|----------------------------------------------------------------------------------------------------------|----------------------------------------------------------------------------------------------------------------------------------------------------------|-------------------------------------------------------------------------------------------------------------------------------------------------------------------|----------------------------------------------------------------------------------------------------------------------------------------------------------------------|
| <b>A. Typhoid fever</b> | Code _____                                                                                                 |                                                                                                          | Code _____                                                                                                                                               | Code _____                                                                                                                                                        | Code _____                                                                                                                                                           |
| <b>B. Cholera</b>       | Code _____                                                                                                 |                                                                                                          | Code _____                                                                                                                                               | Code _____                                                                                                                                                        | Code _____                                                                                                                                                           |
| <b>C. Malaria</b>       | Code _____                                                                                                 |                                                                                                          | Code _____                                                                                                                                               | Code _____                                                                                                                                                        | Code _____                                                                                                                                                           |
| <b>D. Influenza</b>     | Code _____                                                                                                 |                                                                                                          | Code _____                                                                                                                                               | Code _____                                                                                                                                                        | Code _____                                                                                                                                                           |
| <b>E. Meningitis</b>    | Code _____                                                                                                 |                                                                                                          | Code _____                                                                                                                                               | Code _____                                                                                                                                                        | Code _____                                                                                                                                                           |
| <b>F. Hepatitis E</b>   | Code _____                                                                                                 |                                                                                                          | Code _____                                                                                                                                               | Code _____                                                                                                                                                        | Code _____                                                                                                                                                           |
| <b>G. Tuberculosis</b>  | Code _____                                                                                                 |                                                                                                          | Code _____                                                                                                                                               | Code _____                                                                                                                                                        | Code _____                                                                                                                                                           |
| <b>H. HIV/AIDS</b>      | Code _____                                                                                                 |                                                                                                          | Code _____                                                                                                                                               | Code _____                                                                                                                                                        | Code _____                                                                                                                                                           |

| <b>List A: Possible causes</b>                                                                | <b>List B: Possible preventive measures</b>                                                                                                                       |
|-----------------------------------------------------------------------------------------------|-------------------------------------------------------------------------------------------------------------------------------------------------------------------|
| [1] Alcohol consumption<br>[2] Weather/witchcraft<br>[3] Mosquito/insect bite<br>[4] Dog bite | [1] No alcohol consumption<br>[2] Sleeping under bed net<br>[3] Using mosquito/insect spray<br>[4] Maintain a clean house and immediate surroundings of the house |

Site \_\_\_\_\_ Subarea \_\_\_\_\_ House number \_\_\_\_\_ Interviewer ID \_\_\_\_\_

1  
2  
3  
4  
5  
6  
7  
8  
9  
10  
11  
12  
13  
14  
15  
16  
17  
18  
19  
20  
21  
22  
23  
24  
25  
26  
27  
28  
29  
30  
31  
32  
33  
34  
35  
36  
37  
38  
39  
40  
41  
42  
43  
44  
45  
46  
47

|                                                                                                      |                                                                                                                              |
|------------------------------------------------------------------------------------------------------|------------------------------------------------------------------------------------------------------------------------------|
| [5] Drinking untreated surface/spring water (i.e. lake, pond, river, stream, canal/irrigation canal) | [5] Practice proper disposal of human and domestic waste                                                                     |
| [6] Close body contact/kissing/hugging                                                               | [6] Avoiding close contact to dogs                                                                                           |
| [7] Eating raw food items such as vegetables/lettuce, fruits, dairy products, eggs, meat or fish     | [7] Treating water (i.e. boiling, filtration, solar disinfection, sedimentation, chlorination)                               |
| [8] Not cleaning hands properly when preparing food/meals                                            | [8] Not cooking/preparing food/meals with untreated water                                                                    |
| [9] Not cleaning hands properly before/after visiting a toilet                                       | [9] Not washing food items to be consumed raw with untreated water                                                           |
| [10] Contact to human blood (i.e. injection, transfusion, surgery)                                   | [10] Re-boiling/re-heating left-over/prepared food/meals prior to consumption                                                |
| [11] Consuming raw animal blood                                                                      | [11] Not eating raw food items such as vegetables/lettuce, fruits, dairy products, eggs, meat or fish                        |
| [12] Other, specify _____                                                                            | [12] Cover food items/meals                                                                                                  |
| [99] Don't know                                                                                      | [13] Protect food items/meals from flies                                                                                     |
| [98] No response                                                                                     | [14] Avoid food/beverage from street vendors                                                                                 |
|                                                                                                      | [15] Avoid close contact to sick people                                                                                      |
|                                                                                                      | [16] No close body contact/kissing/hugging                                                                                   |
|                                                                                                      | [17] Covering nose/mouth while sneezing/coughing                                                                             |
|                                                                                                      | [18] No contact/consumption of human/animal blood                                                                            |
|                                                                                                      | [19] Practicing proper hand hygiene when preparing food/meals (i.e. washing hands with soap and water, rub hands clean)      |
|                                                                                                      | [20] Practicing proper hand hygiene before/after visiting a toilet (i.e. washing hands with soap and water, rub hands clean) |
|                                                                                                      | [21] Other, specify _____                                                                                                    |
|                                                                                                      | [99] Don't know                                                                                                              |
|                                                                                                      | [98] No response                                                                                                             |

Peer review only

Site \_\_\_\_\_ Subarea \_\_\_\_\_ House number \_\_\_\_\_

Interviewer ID \_\_\_\_\_

**10 For which members of this household are the preventive measures as listed in question 9.5 against typhoid fever used?***Instructions:* Tick all that applies; more than one answer is possible.

- 1=<2years       3= $\geq$ 5 to <15years       5=NOT USED       99=Don't know  
 2= $\geq$ 2 to < 5years       4= $\geq$ 15years       98=No response

**11 Name the household members that were diagnosed with typhoid fever during the past 3 months. Which diagnostics were used to confirm typhoid fever?***Instructions:* Enter all codes that apply for each household member; more than one answer is possible.

| Member 1<br>Initials/Identifier: _____ | Member 2<br>Initials/Identifier: _____ | Member 3<br>Initials/Identifier: _____                | Member 4<br>Initials/Identifier: _____ |
|----------------------------------------|----------------------------------------|-------------------------------------------------------|----------------------------------------|
| [1] Blood culture                      | [3] Blood/Widal test                   | [5] Not applicable (not diagnosed with typhoid fever) |                                        |
| [2] Stool culture                      | [4] Other test, specify _____          | [99] Don't know                                       | [98] No response                       |
| Code _____                             | Code _____                             | Code _____                                            | Code _____                             |

**12 (Where were members of this household recorded in question 11 diagnosed for typhoid fever?) Where did members of this household seek care?***Instructions:* Enter one code by household member only.

| Member 1<br>Initials/Identifier: _____ | Member 2<br>Initials/Identifier: _____ | Member 3<br>Initials/Identifier: _____ | Member 4<br>Initials/Identifier: _____ |
|----------------------------------------|----------------------------------------|----------------------------------------|----------------------------------------|
| [1] Healthcare facility, specify _____ | [6] Nowhere, did not seek care         |                                        |                                        |
| [2] Physician                          | [7] Other, specify _____               |                                        |                                        |
| [3] Nowhere, self-treatment            | [8] Not applicable                     |                                        |                                        |
| [4] Traditional healer                 | [99] Don't know                        |                                        |                                        |
| [5] Pharmacy                           | [98] No response                       |                                        |                                        |
| Code _____                             | Code _____                             | Code _____                             | Code _____                             |

**13 (Did members of this household that were diagnosed with typhoid fever as recorded in question 11 get any treatment?) Which treatment did they get?***Instructions:* Tick one answer by household member only.

| Member 1<br>Initials/Identifier: _____           | Member 2<br>Initials/Identifier: _____           | Member 3<br>Initials/Identifier: _____           | Member 4<br>Initials/Identifier: _____           |
|--------------------------------------------------|--------------------------------------------------|--------------------------------------------------|--------------------------------------------------|
| <input type="radio"/> 1=Treatment, specify _____ | <input type="radio"/> 1=Treatment, specify _____ | <input type="radio"/> 1=Treatment, specify _____ | <input type="radio"/> 1=Treatment, specify _____ |
| <input type="radio"/> 2=Not applicable           | <input type="radio"/> 2=Not applicable           | <input type="radio"/> 2=Not applicable           | <input type="radio"/> 2=Not applicable           |
| <input type="radio"/> 99=Don't know              | <input type="radio"/> 99=Don't know              | <input type="radio"/> 99=Don't know              | <input type="radio"/> 99=Don't know              |
| <input type="radio"/> 98=No response             | <input type="radio"/> 98=No response             | <input type="radio"/> 98=No response             | <input type="radio"/> 98=No response             |

Site \_\_\_\_\_ Subarea \_\_\_\_\_ House number \_\_\_\_\_

Interviewer ID \_\_\_\_\_

## FORM 5: ASSESSMENT OF OVERALL, AGE-AND SEX-STRATIFIED ACTUAL HEALTHCARE UTILIZATION

### HEALTHCARE SEEKING BEHAVIOR

- 1 Record below any occurrence of a sign(s)/ a symptom(s) (see List 1) and specify where (see List 2) and how often a member/members sought healthcare during the past 3 months?**

*Instructions:* See "Form 3 - Part A - GENERAL HOUSEHOLD INFORMATION" to obtain the initials/identifier of each household member. Indicate one sign/symptom per line only. Start a new line if different healthcare options were selected for recurring signs/symptoms. Indicate the number of occurrences for each sign/symptom during the past 3 months. If a different healthcare option was taken for a recurring sign/symptom, indicate this on a new line. Please complete an additional form if >20 occurrences took place during the past 3 months.

| List 1:<br>Sign/Symptom                                                                                                                                                                                                                                                                                                                                         | List 2:<br>Healthcare option                                                                                                                                                                                                                                                                                                                                                                                                    |
|-----------------------------------------------------------------------------------------------------------------------------------------------------------------------------------------------------------------------------------------------------------------------------------------------------------------------------------------------------------------|---------------------------------------------------------------------------------------------------------------------------------------------------------------------------------------------------------------------------------------------------------------------------------------------------------------------------------------------------------------------------------------------------------------------------------|
| [A] Fever, any<br>[B] Fever <3days (continuous)<br>[C] Fever ≥3days (continuous)<br>[D] Chills/ Shivering<br>[E] Convulsion<br>[F] Weight loss<br>[G] Dehydration<br>[H] Malaise/ Weakness/ Fatigue<br>[I] Aches/Pain (muscle/joint/bone)<br>[J] Headache<br>[K] Dizziness/Confusion/<br>Unconsciousness<br>[L] Blood pressure disorders<br>[M] Heart disorders | [N] Nausea/ Vomiting<br>[O] Diarrhea (watery/bloody/mucopurulent)<br>[P] Abdominal pain/ Intestinal pain<br>[Q] Blood loss/ Bleeding (internal)<br>[R] Blood loss/ Bleeding (external)<br>[S] Sneezing/ Runny nose<br>[T] Cough<br>[U] Rapid breathing/ Shortness of breath<br>[V] Severe breathing/ Difficulties in breathing<br>[W] Skin inflammation (rashes/redness/<br>pus/itching)<br>[X] Swelling/ Edema<br>[Y] Jaundice |
|                                                                                                                                                                                                                                                                                                                                                                 | [1] Study-HCF,<br>Code _____<br>[2] Other HCF,<br>Code _____<br>[3] Physician<br>[4] Pharmacy<br>[5] Traditional healer<br>[6] Nowhere/Self-<br>treatment<br>[7] Nowhere/Nothing                                                                                                                                                                                                                                                |

| No. | Household member<br>Record the initials/identifier of a household member; see "Form 3 - Part A - GENERAL HOUSEHOLD INFORMATION" | Sign/<br>Symptom<br>Use List 1 to select a code | Healthcare option           |          | Frequency<br>Indicate the number of incidences for the sign/symptom listed |
|-----|---------------------------------------------------------------------------------------------------------------------------------|-------------------------------------------------|-----------------------------|----------|----------------------------------------------------------------------------|
|     |                                                                                                                                 |                                                 | Use List 2 to select a code | HCF code |                                                                            |
| 1   |                                                                                                                                 |                                                 |                             |          |                                                                            |
| 2   |                                                                                                                                 |                                                 |                             |          |                                                                            |
| 3   |                                                                                                                                 |                                                 |                             |          |                                                                            |
| 4   |                                                                                                                                 |                                                 |                             |          |                                                                            |
| 5   |                                                                                                                                 |                                                 |                             |          |                                                                            |
| 6   |                                                                                                                                 |                                                 |                             |          |                                                                            |
| 7   |                                                                                                                                 |                                                 |                             |          |                                                                            |
| 8   |                                                                                                                                 |                                                 |                             |          |                                                                            |
| 9   |                                                                                                                                 |                                                 |                             |          |                                                                            |

Site \_\_\_\_ Subarea \_\_\_\_ House number \_\_\_\_

Interviewer ID \_\_\_\_

|    |  |  |  |  |  |
|----|--|--|--|--|--|
| 10 |  |  |  |  |  |
| 11 |  |  |  |  |  |
| 12 |  |  |  |  |  |
| 13 |  |  |  |  |  |
| 14 |  |  |  |  |  |
| 15 |  |  |  |  |  |
| 16 |  |  |  |  |  |
| 17 |  |  |  |  |  |
| 18 |  |  |  |  |  |
| 19 |  |  |  |  |  |
| 20 |  |  |  |  |  |

For peer review only

1  
2  
3  
4  
5  
6  
7  
8  
9  
10  
11  
12  
13  
14  
15  
16  
17  
18  
19  
20  
21  
22  
23  
24  
25  
26  
27  
28  
29  
30  
31  
32  
33  
34  
35  
36  
37  
38  
39  
40  
41  
42  
43  
44  
45  
46  
47  
48  
49  
50  
51  
52  
53  
54  
55  
56  
57  
58  
59  
60

### Appendix 3/Supplementary file 3: Protocol, Definitions/Terminology and Study Forms (French)

#### Protocol

#### Évaluation du comportement de santé et d'autres facteurs démographiques: une étude standardisée dans plusieurs cohortes en Afrique subsaharienne

##### Abstrait

**Introduction** L'objectif de l'étude HPAfrica est de déterminer les comportements sanitaires et autres facteurs démographiques, y compris les facteurs socio-économiques, ethnographiques aussi bien que d'hygiène et d'assainissement sur les sites d'étude du programme Fièvre Typhoïde Sévère en Afrique (SETA). L'objectif du programme SETA est d'enquêter sur la surveillance de la fièvre au niveau des établissements de soins de santé au Burkina Faso, en République Démocratique du Congo (RDC), en Éthiopie, au Ghana, à Madagascar et au Nigéria. Les estimations précises de la charge de morbidité nécessitent un ajustement des styles de comportements sanitaires, qui sont supposés varier au sein d'une population d'étude.

**Methodes** Pour la taille d'échantillon minimale requise, les hypothèses d'une population infinie, d'un effet de plan et d'une stratification par âge et sexe sont considérées. En l'absence d'un cadre d'échantillonnage ou d'une liste de ménages, une approche géospatiale sera utilisée pour générer des points aléatoires géographiques avec un outil ArcGIS (Aeronautical Reconnaissance Coverage Geographic Information System). Les impressions de l'imagerie satellite Google Earth Pro® visualisent ces points. Les données d'intérêt seront évaluées au niveau des ménages en différentes saisons en appliquant un échantillonnage simple, stratifié en fonction du poids. Une application basée sur Android et un service Web ont été mis au point pour la capture de données électroniques et la synchronisation avec le serveur de base de données sur Internet en temps réel. Cela permet la documentation de données simultanée.

**Analyse** Des analyses de données descriptives seront effectuées afin d'évaluer les informations de base sur / à propos de chaque population d'étude HPAfrica et le comportement santé stratifié par âge et par sexe. Ceci permettra d'ajuster les estimations de la charge de morbidité. En outre, des analyses multivariées seront appliquées pour examiner les associations entre le comportement santé, les facteurs démographiques et la charge de morbidité (fardeau de la maladie) trouvée dans l'étude SETA.

##### Défis attendus

- La normalisation dans la recherche multi-pays /-site à base communautaire nécessite de la prudence compte tenu des variations de cadre, de langue et de culture.
- Les données de population actuelles dans les sites d'étude et leurs sous-zones définies administrativement sont supposées être limitées.
- L'accessibilité aux ménages peut être compliqué par des facteurs environnementaux.
- La collecte de données électroniques peut entraîner problèmes techniques liés aux dommages, aux pannes fonctionnelles ou à la perte de dispositifs.
- Une connexion Internet sans fil instable peut limiter les équipes de données à mettre à jour l'application basée sur Android, communiquer en temps réel avec les responsables de l'étude et à synchroniser les données collectées avec le serveur.

##### Ethics References

- Comité d'Examen Institutionnel d'IVI, No. 2015-006
- Institute de Médecine Tropicale d'Antwerp, Comité d'Examen, Belgique
- Universiteit Antwerpen, Comite voor medische Ethiek, Belgique
- Ministère de la Santé du Burkina Faso – Comité d'Ethique pour la Recherche en Santé, Burkina Faso
- Comité d'Ethique de l'Ecole de Santé Publique de l'Université de Kinshasa, République Démocratique du Congo



- Comité National d'Examen de l'Éthique de la Recherche, Ministère des Sciences et de la Technologie, République Fédérale Démocratique d'Éthiopie
- Comité d'Éthique de l'AHRI-ALERT, République Fédérale Démocratique d'Éthiopie
- Kwame Nkrumah Université des Sciences et de la Technologie, École des Sciences Médicales/Hôpital Universitaire Komfo Anokye, Comité de la Recherche humaine, de la Publication et de l'Éthique, Ghana
- Ministère de la Santé du République de Madagascar – Comité d'Éthique
- Comité d'Éthique de l'Université d'Idadan/ Hôpital du Collège Universitaire/Comité de l'Éthique, Ibadan, Nigéria

**Mots clés:** comportement santé/hygiénique, assainissement, socio-économique, sélection aléatoire géospatiale, Afrique subsaharienne, HPAfrica étude

### Contexte

L'évaluation du comportement de santé, y compris l'utilisation des soins de santé, est un déterminant important pour la production d'estimations précises du fardeau de la maladie parmi les populations cibles. Ceci est particulièrement important pour les études qui utilisent un modèle de surveillance observationnelle basé sur les établissements de santé, car une variation substantielle des comportements de santé influence fortement les estimations de la maladie (1, 2). L'ajustement des calculs de la maladie pour des variations du comportement en matière de santé augmentera l'exactitude de la prévalence des maladies causées par des pathogènes bactériens, fongiques, viraux ou parasitaires parmi la population étudiée. De plus, l'influence d'une grande variété de facteurs basés sur la population sur le comportement en matière de santé et le fardeau de la maladie a été reconnue. Cela inclut des facteurs socioéconomiques tels que l'éducation, la profession, le revenu, la disponibilité des biens des ménages (3, 4), les facteurs ethniques / religieux et culturels (5, 6), mais aussi l'hygiène et l'assainissement (7-11) - 14), et les contacts avec des animaux (10).

L'étude **Health Population Africa** (HPAfrica) sera menée au Burkina Faso, en République démocratique du Congo (RDC), en Éthiopie, au Ghana, à Madagascar et au Nigéria (Tableau 1). Les expériences du programme Typhoid Fever Surveillance in Africa Program (TSAP) seront reportées sur le programme Severe Typhoid in Africa (SETA) (15, 16). Dans ce programme, une surveillance standardisée de la fièvre, basée sur les établissements de santé, est effectuée sur des sites d'étude sélectionnés dans les pays participants sur une période de deux ans (17). SETA vise principalement à collecter systématiquement des informations sur le fardeau des infections graves à *Salmonella*. Les sujets vivant dans la zone de chalandise définie, avec un épisode de fièvre aiguë, des antécédents de fièvre  $\geq 3$  jours consécutifs, une fièvre typhoïde cliniquement soupçonnée ou des perforations gastro-intestinales cliniquement diagnostiquées dues à la fièvre typhoïde seront éligibles. En outre, la sévérité des maladies provoquées par *Salmonella* et l'histoire naturelle de l'infection à *Salmonella* seront enregistrées avec des analyses supplémentaires sur les réponses immunitaires de l'hôte et le portage chronique.

### Objectifs et Résultats

L'objectif de l'étude HPAfrica est d'évaluer le comportement de santé générique et réel stratifié par âge et par sexe. Le comportement générique se rapporte au comportement associé à la fièvre et à d'autres signes et symptômes sans l'apparition, alors que le comportement réel est lié à l'apparition (Formulaire 4 Partie A, Formulaire 5). Les données sont utilisées pour ajuster les incidences d'agents pathogènes infectieux stratifiés selon l'âge et le sexe pour la proportion d'une population étudiée non capturée par les activités de HPAfrica. Les données documentaires pour divers signes et symptômes ou une combinaison de ceux-ci sont utilisés pour une classification progressive de l'utilisation des soins de santé en fonction de la gravité de la maladie.

L'étude HPAfrica recueillera des données sur les facteurs associés aux soins de santé, tels que les modalités de voyage, la possession d'une assurance maladie, les facteurs culturels/ethnographiques, l'état vaccinal des enfants (18, 19) et la fréquence et la perception individuelle des maladies (Formulaire

4 Partie B). Les données démographiques (Formulaire 3 Partie A) seront utilisés pour la stratification par âge et sexe de la population étudiée qui est nécessaire pour calculer les facteurs d'ajustement pour les incidences de la maladie. Les données socio-économiques (Formulaire 3 Partie B) seront utilisées pour calculer les indices de richesse pour les approches descriptives et analytiques des populations étudiées. Les informations sur l'hygiène et l'assainissement (Formulaire 3 Partie C) peuvent permettre une meilleure compréhension de l'occurrence et de la fréquence des agents pathogènes identifiés parmi les populations étudiées.

## Méthodes

### Sites d'étude

Les limites de chaque site seront définies en utilisant des indications préexistantes qui avaient été déterminées par les autorités statistiques ou ministères de la santé (Tableau 1). L'examen rétrospectif des dossiers (registres/archives) de des deux dernières années aux établissements de soins de santé de recrutement permettra de redéfinir les limites du site. On s'attend à ce que cette revue révèle les résidences ou au moins les zones résidentielles administratives plus larges telles que des communautés, des districts ou des villages de patients qui ont cherché des soins de santé pour une raison quelconque. Des cartes et des images satellites peuvent être utilisées pour mieux visualiser les résidences des patients et les limites générales, y compris les sous-zones définies géographiquement ou administrativement de chaque site. Là où les limites ne peuvent être clairement définies, des facteurs supplémentaires, tels que la distance à un établissement de soins de santé de recrutement, peuvent être pris en compte.

### Taille d'échantillons

Toutes les sources disponibles seront utilisées pour recueillir des données sur la population le plus à jour stratifiées selon l'âge et le sexe par site d'étude et par les sous-zones définies administrativement ou géographiquement. Cela peut inclure les dernières informations démographiques issues d'un recensement de la population ou d'un DSS (Demographic Surveillance System) / HDSS (Health and Demographic Surveillance System). Les chiffres de population et les facteurs de croissance de la population, s'ils sont disponibles, peuvent également être utilisés.

Le nombre minimum de ménages sélectionnés au hasard sera calculé en utilisant l'équation basée de précision (équation-I) (20-23) en supposant une population infinie et en considérant un effet de design (design effect, DEFF), y compris les hypothèses qui l'accompagnent:

#### Equation-I: Calcul de la taille d'échantillon basé sur la précision pour une population infinie (20-23):

$$n_0 = DEFF \cdot \left[ z^2_{1-\alpha/2} \cdot \frac{4 \cdot p \cdot (1-p)}{d^2} \right]$$

#### Hypothèses d'Equation-I

|                  |                                                                                                                                                                                                                               |
|------------------|-------------------------------------------------------------------------------------------------------------------------------------------------------------------------------------------------------------------------------|
| $n_0$            | Nombre minimum de ménages à interroger dans une zone d'étude en supposant une population infinie                                                                                                                              |
| DEFF             | Effect de design; fixé à 1.5                                                                                                                                                                                                  |
| $z_{1-\alpha/2}$ | Déviation Standard correspondant à un intervalle de confiance de 95% (1.96 pour alpha de 0.05)                                                                                                                                |
| d                | Précision (erreur acceptable); estimation de point; fixé à 0.2                                                                                                                                                                |
| p                | Proportion de la population de l'étude devant se rendre dans un établissement de soins de santé de recrutement pour des conditions associées à de la fièvre et d'autres signes et symptômes (proportion capturée); fixé à 0.2 |
| 1-p              | Proportion de la population de l'étude ne devant se rendre dans un établissement de soins de santé de recrutement pour des conditions associées à de la fièvre et d'autres signes et symptômes (proportion non capturée)      |

L'effet de design est un facteur d'ajustement pour le regroupement naturel des comportements de santé au sein des membres d'un ménage (21). Il est défini de façon arbitraire à 1,5 selon la taille du ménage puisqu'aucune estimation exacte n'est disponible (24, 25). Une proportion  $p$  de 0,2 pourra être considérée si aucune autre estimation n'est disponible ou  $p$  pourra être basé sur les expériences au cours de l'étude TSAP: Madagascar, Isotry :  $p=0,01$ , Burkina Faso, Polesgo:  $p=0,9$  (26). Combiner tous les hypothèses dans l'équation-I va avoir pour résultat un nombre global minimum ( $n_0$ ) de 92 ménages à interroger à chaque site.

En outre,  $n_0$  pourra être pris en compte pour la répartition par âge et sexe de chaque population de l'étude représentée par  $\hat{p}$ , la proportion minimum supposée de stratification par groupe d'âge (<5 ans, ≥5 à <15 ans, ≥15 ans). Le facteur  $\hat{p}$  pourra être défini de façon arbitraire à 0,2 ou être basé sur les expériences précédentes: Éthiopie, Butajira :  $\hat{p}=0,09$ , Burkina Faso, Polesgo :  $\hat{p}=0,23$  (26). Appliquer  $\hat{p}$  à l'Equation-I pour une distribution binomiale, y compris ses postulats connexes, aura pour résultat le nombre minimum de ménages à interroger stratifié selon l'âge (Equation-II):

### Equation-II: Calcul de la taille d'échantillon basé sur la précision pour une population infinie avec stratification selon l'âge:

$$\bar{n}_0 = \left( DEFF \cdot \left[ z^2_{1-\alpha/2} \cdot \frac{4 \cdot p \cdot (1-p)}{d^2} \right] \right) / \hat{p}$$

#### Hypothèses d'Equation-II

|                  |                                                                                                                                                                                                                               |
|------------------|-------------------------------------------------------------------------------------------------------------------------------------------------------------------------------------------------------------------------------|
| $\bar{n}_0$      | Nombre minimum de ménages à interroger dans une zone d'étude en supposant une population infinie et une stratification selon l'âge                                                                                            |
| DEFF             | Effect de design; fixé à 1.5                                                                                                                                                                                                  |
| $z_{1-\alpha/2}$ | Déviations Standard correspondant à un intervalle de confiance de 95% (1.96 pour alpha de 0.05)                                                                                                                               |
| $d$              | Précision (erreur acceptable); estimation de point; fixé à 0.2                                                                                                                                                                |
| $p$              | Proportion de la population de l'étude devant se rendre dans un établissement de soins de santé de recrutement pour des conditions associées à de la fièvre et d'autres signes et symptômes (proportion capturée); fixé à 0.2 |
| $1-p$            | Proportion de la population de l'étude ne devant se rendre dans un établissement de soins de santé de recrutement pour des conditions associées à de la fièvre et d'autres signes et symptômes (proportion non capturée)      |
| $\hat{p}$        | Proportion minimum de stratification par groupe d'âge, définie à 0,2                                                                                                                                                          |

Les comportements de santé seront évalués deux fois dans les mêmes ménages si possible ou dans des ménages alternatifs, au cas où la population de l'étude serait instable en raison de la migration et / ou de taux de natalité / mortalité élevés. Des ménages supplémentaires, supposés être de 20% en moyenne (Tableau 2), peuvent être ajoutés pour tenir compte de la possible perte de suivi entre les deux évaluations. Eventuellement,  $\bar{n}_0$  sera divisé par le nombre de sous-zones et pondéré proportionnellement à la taille de la population en appliquant un échantillonnage stratifié selon le poids (16).

### Echantillonnage

Si une base d'échantillonnage ou une liste de ménages compréhensif et à jour existe (par DSS / HDSS ou recensement disponible), une sélection aléatoire informatisée sera effectuée en utilisant SAS (Système d'analyse statistique, version 9.4, SAS Institute, Cary NC) en appliquant une sélection aléatoire simple en série sans remplacement. S'il n'existe aucune base de sondage, celle-ci peut être construite en utilisant l'imagerie satellitaire ou les cartes aériennes pour dénombrer toutes les structures (26), raster (27) ou cellules de grille (28, 29).

Cependant, nous utilisons une technique géospatiale pour la création de points générés par l'outil de génération de points ArcGIS (Aeronautical Reconnaissance Coverage Geographic Information System, Redlands, CA, USA, version 10.2) avec l'application d'un échantillonnage simple stratifié selon le poids

1  
2  
3 (30, 31). L'outil place de façon aléatoire des nombres de points spécifiés dans les entités d'un polygone  
4 correspondant à une sous-zone administrative. Les coordonnées X et Y définissent un point jusqu'à ce  
5 que la taille d'échantillon soit atteinte. Les points aléatoires géographiques générés par ArcGIS sont  
6 convertis en un fichier image au format KML (Keyhole Markup Language) ou KMZ (Keyhole Markup  
7 language Zipped) et importés dans Google Earth Pro® (Google Inc., Mountain View, CA, États-Unis,  
8 version 6.2.2.6613). Un identifiant numérique unique et des coordonnées géographiques horizontales  
9 sont affectés à chaque point. L'emplacement de chaque point est vérifié sur une imagerie satellite Google  
10 Earth Pro® mise à jour. L'annexe 4 illustre notre approche en utilisant des exemples du Ghana et de  
11 Madagascar.  
12

13 Les points géographiques étiquetés avec des identifiants sont représentés sur des impressions de taille  
14 d'affiche (60 x 60 à 60 x 90 cm) d'images satellite Google Earth Pro avec une haute résolution jusqu'au  
15 niveau de la structure. Ces cartes satellites aideront à localiser précisément les points sélectionnés sur le  
16 terrain. Des récepteurs GPS (Global Positioning System) portables (Garmin-eTrex, Garmin Ltd., Lenexa,  
17 KS, USA) aide à vérifier les emplacements. Les récepteurs seront positionnés près d'un point localisé,  
18 dans une position statique et en plein air pour assurer une lecture sans obstacle. En cas de refus,  
19 d'absence du répondant ou de localisation d'un point non résidentiel, un point résidentiel le plus proche  
20 de la droite ou de la gauche sera visité (32).  
21

### 22 **Fréquence de la collecte de données**

23 Les points résidentiels seront visités deux fois pour des entrevues au cours du programme SETA pour  
24 prendre en compte un possible impact lié à la saison, sur le comportement sanitaire (33-37). Les  
25 enquêtes auront lieu à différentes saisons - une à la fin de la saison sèche ou au moins un mois après  
26 son début et une vers la fin de la saison des pluies ou au moins un mois après son début (Tableau 3).  
27 Actuellement, l'étude HPAfrica est en cours au Burkina Faso, au Ghana et à Madagascar et devrait se  
28 poursuivre dans les autres pays au cours des prochains mois.  
29

### 30 **Critères d'inclusion et d'exclusion**

31 Les membres du ménage de tout âge et des deux sexes qui vivent dans la zone d'étude au jour de  
32 l'interview seront éligibles pour l'inclusion. Un ménage sera exclu si le répondant désigne refuse de  
33 participer ou n'est pas disponible après trois visites consécutives. Tous les visiteurs et individus dont le  
34 lieu de résidence n'est pas connu ou est en-dehors de la zone d'étude seront exclus.  
35

36 Pour raison de cette enquête, un ménage est défini comme une personne ou un groupe de personnes  
37 apparentées ou non apparentées vivant dans la même unité d'habitation, reconnaissant un individu  
38 adulte comme chef du ménage, partageant les mêmes installations domestiques, et subvenant  
39 indépendamment à leurs besoins en termes de nourriture et des autres éléments essentiels pour vivre  
40 (26).  
41

42 L'interview aura lieu exclusivement avec le répondant, qui est un membre adulte du ménage à l'âge de  
43 majorité légale spécifique au pays. Cette personne peut être identifiée comme décideur par les membres  
44 du même ménage et sert de substitut pour un ménage entier (15). D'autres définitions pertinentes sont  
45 expliquées subséquentement.  
46

### 47 **Collecte de données**

48 Les intervieweurs de site recevront une formation sur la localisation des points géographiques,  
49 l'identification des répondants, les procédures de consentement éclairé en mettant l'accent sur la  
50 participation volontaire, et sur le déploiement de formulaires d'étude standardisés et pré-testés avant le  
51 lancement de HPAfrica. Les formulaires de consentement éclairé et d'étude seront traduits dans la langue  
52 officielle du pays et retraduits en anglais pour prendre en compte des erreurs de traduction et apporter  
53 des corrections, le cas échéant.  
54

### 55 **Gestion de données**

1  
2  
3 La gestion des données dépendra du mode de collecte, qui sera principalement électronique plutôt que  
4 sur support papier. Les expériences passées ont montré les inconvénients suivants de la collecte de  
5 données sur papier: une forte probabilité d'erreurs lors du remplissage des formulaires d'étude, et le  
6 besoin de numérisation des données, qui est une étape supplémentaire, laborieuse, qui consomme du  
7 temps et sujette aux erreurs. La capture électronique de données à l'aide d'une application pour  
8 smartphone ou tablette réduit ces facteurs limitants à la qualité des données.  
9

10 Il peut y avoir une période pilote au cours de laquelle des données sur support papier et sans papier  
11 seront collectées avant la mise en œuvre complète de la collecte de données électroniques. Ce dernier  
12 utilise l'application Android "HPA Collect" (Google Android 5.0.1 9API 23, disponible à l'adresse  
13 <https://play.google.com/store/apps/details?id=anint.ivi.hpa>) et la plate-forme "HPA Web" (CSS,  
14 JavaScript et JSP, disponible sur <http://hpa.ivi.int/>), qui sont tous deux accompagnés d'un dictionnaire de  
15 variables contenant les codes, la signification et les propriétés des variables au moins en anglais et en  
16 français. Une connectivité internet sans fil stable utilisant des navigateurs par défaut est nécessaire pour  
17 assurer une synchronisation simultanée, attribuable, originale et précise des données entre "HPA Collect"  
18 et "HPA Web". L'accès à "HPA Collect" et "HPA Web" est protégé par un mot de passe. L'annexe 5 affiche  
19 le diagramme du système, qui a les caractéristiques suivantes:  
20

### 21 **Structure ou fonctionnalités de "HPA Collect"**

- 22 • **Gestion des utilisateurs:** Une interface utilisateur simple fournit différents privilèges aux  
23 utilisateurs pour entrer, modifier (sauf pour les étiquettes d'étude) et exporter ou transférer  
24 des données. Il établit une piste d'audit qui enregistre lorsque les utilisateurs entrent des  
25 données dans le serveur.
- 26 • **Saisie de données:** Les données sont entrées directement dans le smartphone ou la  
27 tablette. Les champs de saisie limitent les réponses possibles à des réponses plausibles  
28 uniquement en offrant différentes méthodes de saisie:
  - 29 ▪ Modifier le texte: texte libre
  - 30 ▪ Groupe radio / bouton Multi-clic: choix unique (radio group/Multi click button)
  - 31 ▪ Case à cocher: choix multiple
  - 32 ▪ Sélecteur de date et d'heure: date et heure d'entrée
  - 33 ▪ Spinner: bouton déroulant

34 Des fonctionnalités supplémentaires permettent à l'enquêteur de gagner du temps en  
35 transférant les données collectées plus tôt aux champs de données requis à un stade  
36 ultérieur de l'interview en effectuant des vérifications de vraisemblance pour divers champs  
37 de saisie de données et en reconnaissant facilement les modèles de saut. Les vérifications  
38 d'erreurs, les notifications de données manquantes, les erreurs de code et les erreurs  
39 logiques sont également incluses.

- 40 • **Vue des données:** Les données brutes entrées à l'origine peuvent être vues dans le même  
41 format lisible par l'homme et la machine, à savoir le format JSON, étant donné qu'elles seront  
42 transférées vers un serveur de base de données (Windows, MySQL). Des fonctions  
43 supplémentaires telles que «effacer» pour effacer tous les enregistrements, «réinitialiser»  
44 pour revenir à la page d'entrée de données principale, et «rechercher» pour rechercher une  
45 étiquette d'étude sont disponibles.
- 46 • **Paramètres:** la possibilité de changer la langue du système entre l'anglais et le français est  
47 fournie.
- 48 • **À propos de:** La version actuellement installée de «HPA Collect» est affichée.  
49

### 50 **Structure ou caractéristiques de "HPA Web"**

- 51 • **Accueil:** une introduction à la plateforme est donnée et un tutoriel en français et en anglais  
52 sera accessible.
- 53 • **Aperçu du Formulaire:** Les formulaires d'étude sont affichés séparément montrant chaque  
54 question et les données d'entrée correspondantes en tant que variables définies.  
55  
56  
57  
58  
59

- **Modifier le formulaire:** cette fonction permet la correction des données téléchargées. Il est uniquement accessible aux gestionnaires de données de chaque pays participant et à IVI.
- **Cherche:** Les étiquettes d'étude spécifiques données à chaque formulaire d'étude peuvent être filtrées.
- **Dictionnaire des variables:** Le dictionnaire variable peut être téléchargé.
- **Exporter:** Les données peuvent être converties à partir du serveur dans un fichier Excel transférable.
- **Contactez-nous:** Une correspondance rapide et facile entre les utilisateurs et le gestionnaire de données à IVI est donnée.

Les données seront examinées quotidiennement par le personnel clé de l'étude et vérifiées en termes de consistance et d'exactitude avant l'analyse des données. La qualité des données peut être vérifiée en sélectionnant un sous-ensemble de 5% pour la validation par rapport aux données originales sur support papier, si possible. Les noms des membres du ménage ne seront pas liés aux formulaires d'étude de HPAfrica et ne seront pas enregistrés dans la base de données afin d'assurer la confidentialité. L'accès à la base de données sera limité au personnel d'étude autorisé uniquement et les données seront conservées dans un endroit sécurisé et protégé. Des fichiers de sauvegarde provisoires périodiques et au moins trois fichiers de sauvegarde définitifs de la base de données stockés dans un endroit sécurisé et verrouillé éviteront la perte de données et garantiront la sécurité des données. Toutes les données seront conservées pendant au moins cinq ans.

### L'analyse des données

Des analyses descriptives telles que les fréquences absolues et relatives, les médianes ou les moyennes arithmétiques seront effectuées pour construire une description contemporaine de la population de base.

Les analyses de base comprendront le calcul des proportions stratifiées selon l'âge et le sexe, des comportements sanitaires *génériques* et *réels*, y compris l'utilisation des soins de santé, pour divers signes et symptômes ou combinaisons de signes et de symptômes. Ces analyses permettront une classification graduelle basée sur la sévérité de la maladie, incluant un intervalle de confiance de 95%. Le comportement de santé sera ajusté pour un effet de regroupement naturel présumé parmi les membres du ménage. Des données stratifiées les plus à jour sur la population par site et les données démographiques dérivées de HPAfrica seront utilisées pour générer les proportions pour l'ajustement des calculs d'incidence.

Les informations socio-économiques collectées seront utilisées pour construire des indices de richesse des populations étudiées en appliquant des analyses factorielles basées sur la méthode des composantes principales (38). De plus, des analyses de régression bi et multivariée seront effectuées pour identifier les facteurs de confusion potentiels ou la modification des effets en utilisant les scores factoriels.

Les analyses de régression bi et multivariée seront effectuées en utilisant les scores factoriels pour l'évaluation des variables suivantes:

- Données socioéconomiques telles que l'éducation, le revenu, l'assurance maladie, le logement et les biens des ménages
- Hygiène et assainissement tels que l'accès aux toilettes, les sources d'eau, la manipulation des aliments, l'élimination des déchets et les contacts avec les animaux
- Comportement sanitaire: *réel* (stratifié selon l'âge et le sexe, gravité, fréquence), *générique* (stratifié selon l'âge et le sexe, gravité, classement par choix)
- Modalités de déplacement vers les établissements de santé, stratifiées selon l'âge
- Saisonnalité liée à l'hygiène et à l'assainissement, comportement sanitaire, modalités de déplacement
- Facteurs culturels / religieux / ethnographiques, stratifiés selon l'âge
- Statut de vaccination parmi les enfants  $\leq 6$  ans (18, 19)
- Connaissance et perception des maladies courantes

### Considérations éthiques

Il n'y a pas d'avantages directs pour les ménages inscrits et leurs membres. Les avantages indirects pour la population générale sur les sites seront les informations mises à jour sur le fardeau des maladies transmissibles, y compris les facteurs influençant la transmission de la maladie et l'infection. L'étude HPAfrica génère des évidences pour aider les décideurs à introduire des mesures appropriées pour la prévention et le contrôle des maladies.

Ce protocole a fait l'objet d'examens par le Comité de Révision Institutionnelle d'IVI et des comités locaux spécifiques aux sites, comme indiqué dans la section «Références éthiques». Pendant et après l'étude HPAfrica, toutes les données des sujets inscrits seront gardés avec une stricte confidentialité et ne seront pas divulguées à une tierce partie par aucun membre de l'équipe de recherche. La protection par mot de passe des appareils et de la base de données est utilisée pour une stricte confidentialité. Toutes les données sur support papier (formulaires de consentement) seront conservées dans un endroit sécurisé et verrouillé. Les informations confidentielles stockées sur des ordinateurs et des sources de données sur support papier seront seulement mises à la disposition des co-chercheurs et du personnel d'IVI directement impliqués dans les activités d'étude de HPAfrica.

### Abbréviations

JSON: JavaScript Objective Notation; CSS: Cascading Style Sheets; JSP: Java Server Page; SQL: Structured Query Language

## Définitions/Terminologie

| <b>A</b>                                         |                                                                                                                                                                                                                                                                                                                                                                                                                                                                                                                                                                                                                                                                                                |
|--------------------------------------------------|------------------------------------------------------------------------------------------------------------------------------------------------------------------------------------------------------------------------------------------------------------------------------------------------------------------------------------------------------------------------------------------------------------------------------------------------------------------------------------------------------------------------------------------------------------------------------------------------------------------------------------------------------------------------------------------------|
| Automédication                                   | Fait de se médicamenter soi-même ou de traiter sa propre maladie ou son état sans supervision médicale ou ordonnance.                                                                                                                                                                                                                                                                                                                                                                                                                                                                                                                                                                          |
| <b>B</b>                                         |                                                                                                                                                                                                                                                                                                                                                                                                                                                                                                                                                                                                                                                                                                |
| <b>C</b>                                         |                                                                                                                                                                                                                                                                                                                                                                                                                                                                                                                                                                                                                                                                                                |
| Choléra                                          | Maladie infectieuse de l'intestin grêle qui peut être mortelle causée par la bactérie <i>Vibrio cholerae</i> ; elle se propage par voie fécale-orale par l'ingestion d'eau et d'aliments contaminés et provoque fièvre, diarrhée aqueuse sévère, vomissements et déshydratation.                                                                                                                                                                                                                                                                                                                                                                                                               |
| Confusion/Vertiges/Perte de connaissance         | L'état de désorientation ou d'absence de clarté d'esprit ; l'état anormal de réponse aux stimuli dans l'environnement; faible, wooziness, faiblesse, instabilité ou tendance à tomber; l'interruption de la conscience de soi et de son environnement.                                                                                                                                                                                                                                                                                                                                                                                                                                         |
| Convulsion                                       | Mouvement soudain, violent et irrégulier d'un membre/d'une partie du corps ou de tout le corps causé par une contraction involontaire des muscles.                                                                                                                                                                                                                                                                                                                                                                                                                                                                                                                                             |
| Coqueluche (Pertussis)                           | La coqueluche est une maladie bactérienne très contagieuse. Les symptômes d'un froid commun comme nez qui coule, fièvre et toux sont suivis par des semaines de toux sévère et un son aigu de la coqueluche ou haletant quand une personne malade inspire; toux sévère peut être suivie de vomissements, rupture des côtes ou fatigue extrême. Les très jeunes et les personnes âgées infectées peuvent avoir peu ou pas de toux, ou peuvent avoir des périodes de respiration interrompue pendant lesquelles elles ne respirent pas. La coqueluche est transmise par la bactérie <i>Bordetella pertussis</i> par toux et étternuements d'une personne infectée.                               |
| <b>D</b>                                         |                                                                                                                                                                                                                                                                                                                                                                                                                                                                                                                                                                                                                                                                                                |
| Déshydratation                                   | Une condition de perte excessive d'eau/d'hydratation par le corps.                                                                                                                                                                                                                                                                                                                                                                                                                                                                                                                                                                                                                             |
| Diarrhée                                         | Une condition d'évacuer les matières fécales du corps très fréquemment et sous forme plutôt liquide que solide.                                                                                                                                                                                                                                                                                                                                                                                                                                                                                                                                                                                |
| Difficultés respiratoires/<br>Respiration sévère | Une condition de la respiration anormale accompagnée d'une respiration sifflante, d'une douleur thoracique, d'un tirage thoracique, d'un stridor, d'un gonflement de la poitrine ou d'une toux par exemple.                                                                                                                                                                                                                                                                                                                                                                                                                                                                                    |
| Diphthérie                                       | Maladie hautement contagieuse, parfois mortelle, causée par la bactérie <i>Corynebacterium diphtheriae</i> . Elle se transmet de personne à personne, par l'air ou les objets contaminés et affecte les voies respiratoires supérieures. Les symptômes courants sont maux de gorge, gonflement des glandes/ ganglions lymphatiques, malaise, fièvre/frissons, substance membraneuse/matière grise et épaisse qui se forme dans la gorge/sur les amygdales et gêne/accélère la respiration (toux rauque) et gêne pour avaler. Une forme de diphtérie qui implique la peau, les yeux et les organes génitaux est également signalée et se caractérise par une peau douloureuse, rouge et enflée. |
| Douleur abdominale/<br>Douleur intestinale       | Douleur (aiguë/courte durée ou chronique/longue durée) qui survient entre la poitrine et l'aîne (souvent désignée comme la région de l'estomac/du ventre)                                                                                                                                                                                                                                                                                                                                                                                                                                                                                                                                      |
| Douleur intestinale/Douleur abdominale           | Douleur (aiguë/courte durée ou chronique/longue durée) qui survient entre la poitrine et l'aîne (souvent désignée comme la région de l'estomac/du ventre)                                                                                                                                                                                                                                                                                                                                                                                                                                                                                                                                      |
| Douleur/Maux                                     | État caractérisé par une douleur sourde continue/prolongée dans une partie du corps ; la sensation/souffrance/inconfort physique causée par                                                                                                                                                                                                                                                                                                                                                                                                                                                                                                                                                    |



|                                      |                                                                                                                                                                                                                                                                                                                                                                                                                                                                          |
|--------------------------------------|--------------------------------------------------------------------------------------------------------------------------------------------------------------------------------------------------------------------------------------------------------------------------------------------------------------------------------------------------------------------------------------------------------------------------------------------------------------------------|
|                                      | une maladie/une blessure/quelque chose qui fait mal au corps.                                                                                                                                                                                                                                                                                                                                                                                                            |
| <b>E</b>                             |                                                                                                                                                                                                                                                                                                                                                                                                                                                                          |
| Éducation formelle                   | Modèle d'éducation systématique et organisée structuré et administré selon un ensemble de lois et de normes ; les institutions d'éducation formelle sont organisées de façon administrative, physique et pédagogique et exigent des étudiants une assiduité minimum ; il implique des évaluations intermédiaires et finales afin d'accéder au niveau d'apprentissage suivant ; il délivre des certificats et des diplômes conformément à un ensemble de règles strictes. |
| Essoufflement/<br>Respiration rapide | Fait de respirer anormalement rapidement et profondément ; à une fréquence de >20 respirations par minute pour les adultes, >30 respirations par minute pour les enfants et >45 respirations par minute par les bébés.                                                                                                                                                                                                                                                   |
| Établissement de santé               | Lieux ou institutions où des soins de santé sont prodigués ; dont les hôpitaux, les cliniques, les centres de santé, les postes de santé et les centres de soins spécialisé.                                                                                                                                                                                                                                                                                             |
| Éternuement                          | Fait d'expulser soudainement l'air par le nez et la bouche avec un bruit important caractéristique.                                                                                                                                                                                                                                                                                                                                                                      |
| <b>F</b>                             |                                                                                                                                                                                                                                                                                                                                                                                                                                                                          |
| Faiblesse/Malaise/Fatigue            | État de se sentir fatigué/épuisé/à bout de forces ; sentiment général d'inconfort/malaise/de ne pas être en bonne santé ou heureux.                                                                                                                                                                                                                                                                                                                                      |
| Fatigue/Malaise/<br>Faiblesse        | État de se sentir fatigué/épuisé/à bout de forces ; sentiment général d'inconfort/malaise/de ne pas être en bonne santé ou heureux.                                                                                                                                                                                                                                                                                                                                      |
| Fièvre                               | Température corporelle anormalement élevée (habituellement au-dessus de 38°C).                                                                                                                                                                                                                                                                                                                                                                                           |
| Fièvre <3 jours                      | Température corporelle anormalement élevée (habituellement au-dessus de 38°C) qui dure moins de 3 jours et apparaît en continu.                                                                                                                                                                                                                                                                                                                                          |
| Fièvre >3 jours                      | Température corporelle anormalement élevée (habituellement au-dessus de 38°C) qui dure plus de 3 jours et apparaît en continu.                                                                                                                                                                                                                                                                                                                                           |
| Fièvre jaune                         | Maladie infectieuse aiguë, pathogène pour l'homme et virale caractérisée par l'apparition soudaine de symptômes comme fièvre, frissons, perte d'appétit, nausée, douleurs musculaires et maux de tête qui disparaissent généralement en quelques jours ou sont suivis de symptômes plus graves comme jaunisse, fièvre forte et hémorragie. La maladie est causée par un virus du genre Flavivirus et est transmise par la piqûre d'un moustique infecté.                 |
| Fièvre typhoïde                      | Maladie infectieuse bactérienne potentiellement mortelle causée par <i>Salmonella typhi</i> ; elle se transmet par la voie fécale-orale par les aliments et l'eau contaminés ou de personne à personne. Les symptômes courants sont forte fièvre, maux de tête, douleur abdominale, constipation/diarrhée et éruption cutanée. Des complications graves (perforation de l'intestin) sont rapportées.                                                                     |
| Frissons                             | Sensation de froid qui peut être accompagnée de frissons/tremblements du corps et de pâleur de la peau                                                                                                                                                                                                                                                                                                                                                                   |
| <b>G</b>                             |                                                                                                                                                                                                                                                                                                                                                                                                                                                                          |
| Gonflement/Œdème                     | État d'accumulation excessive de liquide aqueux/gonflement des cavités ou des tissus du corps ; couramment constaté dans les mains/bras/pieds/jambes ; augmentation du volume de tissu.                                                                                                                                                                                                                                                                                  |
| Grippe                               | Maladie infectieuse hautement contagieuse des voies respiratoires causée par le virus de la grippe ; elle se propage de personne à personne par les particules expulsées par la toux/les éternuements/la parole et les objets contaminés. Les symptômes courants sont fièvre,                                                                                                                                                                                            |

|                                                |                                                                                                                                                                                                                                                                                                                                                                                                                                                                                                                                   |
|------------------------------------------------|-----------------------------------------------------------------------------------------------------------------------------------------------------------------------------------------------------------------------------------------------------------------------------------------------------------------------------------------------------------------------------------------------------------------------------------------------------------------------------------------------------------------------------------|
|                                                | douleurs dans les muscles/bras/jambes, frissons/sueur, maux de tête, fatigue/faiblesse, nez qui coule/congestion nasale, éternuements, maux de gorge et toux sèche et persistante.                                                                                                                                                                                                                                                                                                                                                |
| Guérisseur traditionnel                        | Personne qui cherche à maintenir la santé aussi bien qu'à prévenir, diagnostiquer et améliorer ou traiter les maladies en utilisant un ensemble de connaissances, compétences et pratiques basées sur des théories, des croyances et des expériences.                                                                                                                                                                                                                                                                             |
| <b>H</b>                                       |                                                                                                                                                                                                                                                                                                                                                                                                                                                                                                                                   |
| <i>Haemophilus influenzae</i> de type B        | Bactérie qui provoque une série de maladies et se propage par les particules expulsées par la toux ou les éternuements, et surviennent surtout chez l'enfant de moins de 5 ans ; les symptômes courants sont fièvre, maux de tête et raideur dans le cou jusqu'à l'état septique. Elle peut causer otites, cellulites (infection des tissus mous), arthrite, infections des voies respiratoires supérieures, pneumonies, méningites (avec dommages potentiels au cerveau) et épiglottites (avec obstruction des voies aériennes). |
| Hémorragie (interne/externe)/<br>Perte de sang | État caractérisé par une perte de sang du système vasculaire, soit de façon interne à l'intérieur du corps (hémorragie interne) soit de façon externe par un orifice naturel ou une lésion de la peau (hémorragie externe) ; sang qui s'échappe d'un vaisseau sanguin endommagé.                                                                                                                                                                                                                                                  |
| Hépatite B                                     | Maladie infectieuse causée par le virus de l'hépatite B (VHB) qui affecte le foie (infection hépatique aiguë/chronique ; peut entraîner une insuffisance hépatique/un cancer/une cirrhose). Le virus se transmet de personne à personne par le sang/le sperme/les autres fluides corporels. Les symptômes courants sont fièvre, malaise/faiblesse/fatigue, perte d'appétit, nausée/vomissements, gêne/douleur abdominale, urines foncées, douleurs articulaires et jaunisse.                                                      |
| Hépatite E                                     | Maladie infectieuse causée par le virus de l'hépatite E (VHE) qui affecte le foie (infection hépatique aiguë uniquement ; peut entraîner une insuffisance hépatique aiguë). Le virus se propage par les voies fécales-orales par l'ingestion d'eau ou d'aliments contaminés, les animaux contaminés (de façon zoonotique) et par le sang. Les symptômes courants sont fièvre, malaise, perte d'appétit, diarrhée, nausée, gêne abdominale, urines foncées, douleurs articulaires et jaunisse.                                     |
| <b>I</b>                                       |                                                                                                                                                                                                                                                                                                                                                                                                                                                                                                                                   |
| <b>J</b>                                       |                                                                                                                                                                                                                                                                                                                                                                                                                                                                                                                                   |
| Jaunisse                                       | Maladie qui fait jaunir la peau/le blanc des yeux.                                                                                                                                                                                                                                                                                                                                                                                                                                                                                |
| <b>K/L</b>                                     |                                                                                                                                                                                                                                                                                                                                                                                                                                                                                                                                   |
| <b>M</b>                                       |                                                                                                                                                                                                                                                                                                                                                                                                                                                                                                                                   |
| Malaise/Fatigue/<br>Faiblesse                  | État de se sentir fatigué/épuisé/à bout de forces ; sentiment général d'inconfort/malaise/de ne pas être en bonne santé ou heureux.                                                                                                                                                                                                                                                                                                                                                                                               |
| Maux de tête                                   | Douleur continue dans une région de la tête.                                                                                                                                                                                                                                                                                                                                                                                                                                                                                      |
| Maux/Douleur                                   | État caractérisé par une douleur sourde continue/prolongée dans une partie du corps ; la sensation/souffrance/inconfort physique causée par une maladie/une blessure/quelque chose qui fait mal au corps.                                                                                                                                                                                                                                                                                                                         |
| Médecin                                        | Une personne compétente/formée aux soins ; une personne éduquée, cliniquement expérimentée et autorisée à pratiquer la médecine.                                                                                                                                                                                                                                                                                                                                                                                                  |
| Ménage                                         | Personne ou groupe de personnes apparentées ou non qui vivent ensemble dans la même unité d'habitation, qui reconnaissent un adulte de sexe masculin ou féminin comme le chef du ménage, qui partagent                                                                                                                                                                                                                                                                                                                            |

|                                              |                                                                                                                                                                                                                                                                                                                                                                                                                                                                                                                                                                                               |
|----------------------------------------------|-----------------------------------------------------------------------------------------------------------------------------------------------------------------------------------------------------------------------------------------------------------------------------------------------------------------------------------------------------------------------------------------------------------------------------------------------------------------------------------------------------------------------------------------------------------------------------------------------|
|                                              | les mêmes installations domestiques, qu'on considère comme formant une unité, et qui subviennent à leurs besoins en termes de nourriture et des autres éléments essentiels pour vivre. Un ménage peut être situé dans une unité d'habitation unique (bâtiment à un seul étage) ou dans un ensemble de logements collectifs (bâtiment à plusieurs étages).                                                                                                                                                                                                                                     |
| Méningite                                    | Inflammation virale/bactérienne/fongique infectieuse parfois mortelle des membranes (méninges) qui entourent le cerveau et la moelle épinière ; elle se propage de personne à personne par les particules expulsées par la toux/les éternuements/la parole et les objets contaminés. Les symptômes courants sont forte fièvre, maux de tête sévères, nausée/vomissements, confusion, convulsions ; perte d'appétit et de la soif, fatigue, sensibilité à la lumière, éruption cutanée et raideur au cou.                                                                                      |
| <b>N</b>                                     |                                                                                                                                                                                                                                                                                                                                                                                                                                                                                                                                                                                               |
| Nausée/Vomissements                          | Sensation de malaise dans l'estomac avec tendance à vomir ; fait d'éjecter une partie/tout le contenu de l'estomac principalement par la bouche.                                                                                                                                                                                                                                                                                                                                                                                                                                              |
| Nez qui coule                                | État résultant de la production par le nez (tissus nasaux et adjacents et vaisseaux sanguins) de mucus/drainage excessif, qui coule du nez pour retirer quelque chose.                                                                                                                                                                                                                                                                                                                                                                                                                        |
| <b>O</b>                                     |                                                                                                                                                                                                                                                                                                                                                                                                                                                                                                                                                                                               |
| Œdème/Gonflement                             | État d'accumulation excessive de liquide aqueux/gonflement des cavités ou des tissus du corps ; couramment constaté dans les mains/bras/pieds/jambes ; augmentation du volume de tissu.                                                                                                                                                                                                                                                                                                                                                                                                       |
| Oreillons                                    | Maladie infectieuse virale causée par le virus des oreillons qui affecte principalement les glandes parotides qui sont situées sous et devant les oreilles ; elle se propage de personne à personne par la salive infectée/les particules de salive infectées expulsées par la toux/les éternuements/la parole et les objets contaminés. Les symptômes courants sont fièvre, gonflement d'une/des deux glandes parotides, maux de tête ; douleurs musculaires, faiblesse/fatigue, perte d'appétit et douleurs en mâchant/avalant ; une complication connue est une possible perte d'audition. |
| <b>P</b>                                     |                                                                                                                                                                                                                                                                                                                                                                                                                                                                                                                                                                                               |
| Paludisme                                    | Maladie infectieuse parfois mortelle causée par un parasite ( <i>Plasmodium</i> spp.) transmis principalement par la piqûre de moustiques infectés, en dehors de la transmission mère-enfant et par le sang. Les symptômes courants sont attaques récurrentes de frissons, sueurs, forte fièvre, maux de tête, vomissements et diarrhée.                                                                                                                                                                                                                                                      |
| Personne interrogée                          | Membre adulte (à l'âge légal de majorité du pays concerné) du ménage qui est un décideur en ce qui concerne les soins de santé/l'utilisation des soins de santé pour le ménage entier à l'intérieur du site d'étude ; cette personne adulte parle ainsi au nom de tous les membres du ménage. Cette personne peut être identifiée par les autres membres du même ménage comme la personne qui est principalement impliquée dans les soins quotidiens des membres du ménage.                                                                                                                   |
| Perte de connaissance/<br>Vertiges/Confusion | L'état de désorientation ou d'absence de clarté d'esprit ; l'état anormal de réponse aux stimuli dans l'environnement; faible, wooziness, faiblesse, instabilité ou tendance à tomber; l'interruption de la conscience de soi et de son environnement.                                                                                                                                                                                                                                                                                                                                        |
| Perte de poids                               | Baisse (volontaire/involontaire) du poids du corps.                                                                                                                                                                                                                                                                                                                                                                                                                                                                                                                                           |
| Perte de sang/                               | État caractérisé par une perte de sang du système vasculaire, soit de                                                                                                                                                                                                                                                                                                                                                                                                                                                                                                                         |

|                                                  |                                                                                                                                                                                                                                                                                                                                                                                                                                                                                                                                                                                  |
|--------------------------------------------------|----------------------------------------------------------------------------------------------------------------------------------------------------------------------------------------------------------------------------------------------------------------------------------------------------------------------------------------------------------------------------------------------------------------------------------------------------------------------------------------------------------------------------------------------------------------------------------|
| Hémorragie                                       | façon interne à l'intérieur du corps (hémorragie interne) soit de façon externe par un orifice naturel ou une lésion de la peau (hémorragie externe) ; sang qui s'échappe d'un vaisseau sanguin endommagé.                                                                                                                                                                                                                                                                                                                                                                       |
| Pharmacie                                        | Endroit où seuls des médicaments (ordonnance requise/non requise) sont préparés, conservés, composés et dispensés.                                                                                                                                                                                                                                                                                                                                                                                                                                                               |
| Pneumocoque                                      | Une inflammation infectieuse bactérienne des poumons parfois mortelle qui affecte souvent les personnes immunodéprimées et est causée par la bactérie <i>Streptococcus pneumoniae</i> ; elle se propage de personne à personne par les particules expulsées par la toux/les éternuements/la parole et les objets contaminés. Les symptômes courants sont fièvre, frissons, toux (avec mucosités/pus), douleurs thoraciques, difficulté à respirer/essoufflement, fatigue, nausée/vomissements et diarrhée ; des symptômes rares sont septicémie, épanchement pleural et empyème. |
| Polio                                            | Maladie virale infectieuse, très contagieuse, parfois mortelle, causée par le poliovirus qui cause dans sa forme la plus sévère paralysie et difficultés à respirer ; il se transmet par la voie fécale-orale par ingestion d'eau et d'aliments contaminés et de personne à personne. Les symptômes courants sont fièvre, maux de gorge, maux de tête, vomissements, fatigue, maux de dos, de cou/raideur au cou, faiblesse des muscles/muscles douloureux, méningite, perte de réflexes, membres lourds/pendants.                                                               |
| Occupation                                       | A job, or means of earning a wage/living; often requires the mastery of a complex set of knowledge, tasks, duties and skills acquired through formal education and/or practical experience.                                                                                                                                                                                                                                                                                                                                                                                      |
| <b>Q</b>                                         |                                                                                                                                                                                                                                                                                                                                                                                                                                                                                                                                                                                  |
| <b>R</b>                                         |                                                                                                                                                                                                                                                                                                                                                                                                                                                                                                                                                                                  |
| Respiration rapide/<br>Essoufflement             | Fait de respirer anormalement rapidement et profondément ; à une fréquence de >20 respirations par minute pour les adultes, >30 respirations par minute pour les enfants et >45 respirations par minute par les bébés.                                                                                                                                                                                                                                                                                                                                                           |
| Respiration sévère/<br>Difficultés respiratoires | Une condition de la respiration anormale accompagnée d'une respiration sifflante, d'une douleur thoracique, d'un tirage thoracique, d'un stridor, d'un gonflement de la poitrine ou d'une toux par exemple.                                                                                                                                                                                                                                                                                                                                                                      |
| Revenus/Salaire                                  | Argent ou autre forme de paiement que quelqu'un reçoit périodiquement/régulièrement en échange de biens ou de services. Provient généralement d'un emploi/d'une profession.                                                                                                                                                                                                                                                                                                                                                                                                      |
| Rotavirus                                        | Infection virale causée par le rotavirus qui cause principalement des diarrhées pour les enfants de moins de 5 ans ; elle se propage par la voie fécale-orale, de personne à personne et par les objets contaminés. Les symptômes courants sont diarrhée aqueuse, fièvre, vomissements, douleurs abdominales et déshydratation.                                                                                                                                                                                                                                                  |
| Rougeole                                         | Maladie infectieuse parfois mortelle des voies respiratoire (nez/gorge) causée par un virus qui affecte principalement les enfants de moins de 5 ans ; elle se propage de personne à personne par les particules expulsées par la toux/les éternuements/la parole et les objets contaminés. Les symptômes courants sont fièvre, toux sèche, nez qui coule, inflammation des yeux, maux de gorge, larges plaques sur la peau et points blancs dans la bouche et sur les joues.                                                                                                    |
| Rubéole                                          | Maladie infectieuse virale contagieuse connue pour son éruption cutanée rouge distinctive qui est causée par le virus de la rubéole ; elle se transmet de personne à personne (toux/éternuements/parole), de la mère à l'enfant par le sang et les objets contaminés. Les symptômes courants sont fièvre modérée, maux de tête, nez bouché/qui coule,                                                                                                                                                                                                                            |

|                                          |                                                                                                                                                                                                                                                                                                                                                                                                                                                                                                                                                                                                                                                                                                                                                                                                                                                                                                                                                                      |
|------------------------------------------|----------------------------------------------------------------------------------------------------------------------------------------------------------------------------------------------------------------------------------------------------------------------------------------------------------------------------------------------------------------------------------------------------------------------------------------------------------------------------------------------------------------------------------------------------------------------------------------------------------------------------------------------------------------------------------------------------------------------------------------------------------------------------------------------------------------------------------------------------------------------------------------------------------------------------------------------------------------------|
|                                          | yeux rouges/inflammation des yeux, ganglions lymphatiques gonflés et sensibles à la base du crâne/à l'arrière du cou/derrière les oreilles, douleurs articulaires et éruption cutanée rose qui se déplace du visage au torse, aux bras et aux jambes.                                                                                                                                                                                                                                                                                                                                                                                                                                                                                                                                                                                                                                                                                                                |
| <b>S</b>                                 |                                                                                                                                                                                                                                                                                                                                                                                                                                                                                                                                                                                                                                                                                                                                                                                                                                                                                                                                                                      |
| Soins de santé - généraux                | Soins de santé pour les maladies qui n'ont aucun lien avec l'apparition de maladies associées aux signes et symptômes ou les dates de début de maladies.                                                                                                                                                                                                                                                                                                                                                                                                                                                                                                                                                                                                                                                                                                                                                                                                             |
| Soins de santé - réels                   | Soins de santé liés l'apparition de maladies associées aux signes et symptômes ou les dates de début de maladies.                                                                                                                                                                                                                                                                                                                                                                                                                                                                                                                                                                                                                                                                                                                                                                                                                                                    |
| <b>T</b>                                 |                                                                                                                                                                                                                                                                                                                                                                                                                                                                                                                                                                                                                                                                                                                                                                                                                                                                                                                                                                      |
| Témoin                                   | Personne adulte (à l'âge légal de majorité du pays concerné), qui est indépendante de l'étude, qui ne peut pas être indûment influencée par le personnel de l'étude, qui participe au processus de consentement éclairé si le sujet/le représentant légal du sujet est analphabète, et qui lit (lettré) le formulaire de consentement éclairé et toute autre information écrite présentée au sujet.                                                                                                                                                                                                                                                                                                                                                                                                                                                                                                                                                                  |
| Tétanos                                  | Une maladie infectieuse caractérisée par des spasmes musculaires qui commencent généralement dans la mâchoire et progresse vers le reste du corps. Les spasmes durent généralement quelques minutes et se produisent fréquemment pendant les 3-4 semaines au début de la maladie, ils peuvent être si graves qu'ils peuvent causer des fractures osseuses ou la mort lorsqu'ils affectent les muscles respiratoires. Elle peut être caractérisée par d'autres symptômes comme fièvre, sueurs, maux de tête, difficultés à avaler, pression artérielle élevée et augmentation du rythme cardiaque. La maladie est causée par une infection par la bactérie <i>Clostridium tetani</i> qui se trouve dans sol, saliva, poussière et fumier. La bactérie entre par une lésion cutanée (par exemple, coupure, blessure par ponction) par un objet contaminé. Il produit des toxines qui interfèrent avec les contractions musculaires qui résultent des spasmes typiques. |
| Toux                                     | Fait d'expulser de façon soudaine/rapide et bruyamment l'air des poumons ; souvent de façon involontaire afin de dégager les voies respiratoires des poumons de fluides/mucus/autres matières                                                                                                                                                                                                                                                                                                                                                                                                                                                                                                                                                                                                                                                                                                                                                                        |
| Troubles cardiaques                      | Tout trouble que affecte le cœur ; maladies qui impliquent des vaisseaux sanguins rétrécis/bloqués qui peuvent entraîner une attaque cardiaque/douleur thoracique/accident vasculaire cérébral ; maladie qui affecte le muscle/les valves/le rythme du cœur.                                                                                                                                                                                                                                                                                                                                                                                                                                                                                                                                                                                                                                                                                                         |
| Troubles de la pression artérielle       | Pression artérielle élevée/faible ou pression artérielle qui présente des fluctuations excessives.                                                                                                                                                                                                                                                                                                                                                                                                                                                                                                                                                                                                                                                                                                                                                                                                                                                                   |
| Tuberculose                              | Maladie infectieuse bactérienne ( <i>Mycobacterium tuberculosis</i> ), contagieuse, potentiellement grave qui affecte principalement les poumons en plus des reins et de la colonne vertébrale/du cerveau ; elle se transmet de personne à personne par les particules expulsées par la toux/les éternuements/la parole. Les symptômes courants d'une tuberculose active sont toux (avec/sans sang), douleur thoracique, perte de poids, fatigue, fièvre, sueurs nocturnes, frissons et perte d'appétit.                                                                                                                                                                                                                                                                                                                                                                                                                                                             |
| <b>U</b>                                 |                                                                                                                                                                                                                                                                                                                                                                                                                                                                                                                                                                                                                                                                                                                                                                                                                                                                                                                                                                      |
| <b>V</b>                                 |                                                                                                                                                                                                                                                                                                                                                                                                                                                                                                                                                                                                                                                                                                                                                                                                                                                                                                                                                                      |
| Vertiges/Confusion/Perte de connaissance | L'état de désorientation ou d'absence de clarté d'esprit ; l'état anormal de réponse aux stimuli dans l'environnement; faible, wooziness, faiblesse, instabilité ou tendance à tomber; l'interruption de la                                                                                                                                                                                                                                                                                                                                                                                                                                                                                                                                                                                                                                                                                                                                                          |

|                     |                                                                                                                                                                                                                                                                                                                                                                                                                                                                                                                                                                                                                                                                                                                                                                                                                                             |
|---------------------|---------------------------------------------------------------------------------------------------------------------------------------------------------------------------------------------------------------------------------------------------------------------------------------------------------------------------------------------------------------------------------------------------------------------------------------------------------------------------------------------------------------------------------------------------------------------------------------------------------------------------------------------------------------------------------------------------------------------------------------------------------------------------------------------------------------------------------------------|
|                     | conscience de soi et de son environnement.                                                                                                                                                                                                                                                                                                                                                                                                                                                                                                                                                                                                                                                                                                                                                                                                  |
| VIH/SIDA            | Maladie infectieuse causée par le virus de l'immunodéficience humaine (VIH) qui affecte/endommage le système immunitaire et entraîne le syndrome immunodéficitaire acquis (SIDA), une maladie chronique et potentiellement mortelle ; il se transmet par les liquides corporels infectieux comme le sang/le sperme/les autres fluides corporels. Les symptômes courants d'une infection aiguë/précoce sont fièvre, fatigue, maux de tête, douleurs articulaires, éruption cutanée, maux de gorge, ganglions lymphatiques enflés, diarrhée, perte de poids, candidose orale et zona. La maladie non traitée évolue en SIDA ; les symptômes causés par un système immunitaire gravement endommagé sont sueurs, fièvre récurrente, diarrhée chronique, lésions sur la langue et dans la bouche, fatigue, perte de poids et éruptions cutanées. |
| Visiteur            | Personne (apparentée ou non) qui rend visite à un ménage pour passer du temps avec les membres du ménage ; un visiteur ne vit pas avec les membres du ménage dans la même unité d'habitation, ne partage pas les mêmes installations domestiques, la même nourriture et autres éléments essentiels à la vie que les membres du ménage, et ne constitue pas une unité avec les membres du ménage.                                                                                                                                                                                                                                                                                                                                                                                                                                            |
| Voisin              | Personne (apparentée ou non) vivant dans l'habitation à côté de celle d'un ménage cible ; un voisin ne vit pas avec les membres d'un ménage (à côté) dans la même unité d'habitation, ne partage pas les mêmes installations domestiques, aliments ou autres éléments essentiels à la vie que les membres du ménage (à côté), et ne constitue pas une unité avec les membres du ménage (à côté).                                                                                                                                                                                                                                                                                                                                                                                                                                            |
| Vomissements/Nausée | Sensation de malaise dans l'estomac avec tendance à vomir ; fait d'éjecter une partie/tout le contenu de l'estomac principalement par la bouche.                                                                                                                                                                                                                                                                                                                                                                                                                                                                                                                                                                                                                                                                                            |
| <b>W/X/Y/Z</b>      |                                                                                                                                                                                                                                                                                                                                                                                                                                                                                                                                                                                                                                                                                                                                                                                                                                             |

## Formulaires de l'étude

Site \_\_\_\_ Sous-zone \_\_\_\_ Numéro d'habitation \_\_\_\_ Identifiant de l'enquêteur \_\_\_\_

### FORMULAIRE 1 – COMPTE RENDU DES VISITES AUX MÉNAGES

#### Instructions pour l'enquêteur

- Compléter « Formulaire 1 – COMPTE RENDU DES VISITES AUX MÉNAGES » pour chaque ménage visité.
- Compléter « Foyer/Personne interrogée/Complété » une fois que toutes les parties de l'enquête ont été complétées ; si toutes les données n'ont pas été recueillies lors de la visite initiale et/ou d'une visite ultérieure (max. 3 visites), programmer une nouvelle visite.
- **Tentative 1:** Compléter le statut de la visite au ménage et utilisant les choix proposés ; pour « pas à la maison », « à la maison/ne répond pas » et « à la maison/répond/indisponible », programmer une nouvelle visite ; pour « à la maison/répond/refus » indiquez la raison de refus et visitez un ménage de remplacement au plus proche à droite ou à gauche de ce ménage; pour « inexistant/pas d'habitation », passer ce ménage et visiter un ménage de remplacement au plus proche à droite ou à gauche à la place de ce ménage.
- **Tentative 2:** Compléter le statut de la visite du ménage et utilisant les choix proposés ; pour « pas à la maison », « à la maison/ne répond pas » et « à la maison/répond/indisponible », programmer une nouvelle visite.
- **Tentative 3:** Compléter le statut de la visite au ménage et utilisant les choix proposés ; pour « pas à la maison », « à la maison/ne répond pas » et « à la maison/répond/indisponible », passer ce ménage et visiter un ménage de remplacement au plus proche à droite ou à gauche à la place de ce ménage.
- « Site » et « sous-zone » doivent être un numéro à trois chiffres, « numéro d'habitation » un numéro à quatre chiffres, et « identifiant de l'enquêteur » un numéro à deux chiffres (utiliser les listes préparées individuellement pour chaque site pour obtenir les codes) ; saisir « date » au format JJ/MM/AAAA et « heure » au format HH:MM et entourer MATIN ou APRÈS-MIDI. «Étiquette de l'étude» doit être une combinaison d'un code «site» à trois chiffres, d'un code «sous-zone» à trois chiffres et d'un code «numéro d'habitation» à quatre chiffres; le « identifiant de l'enquêteur » doit être un numéro à trois chiffres.

| Tentative 1                            | Date ____/____/____<br>(JJ/MM/AA) | Heure ____/____<br>MATIN/APRÈS-MIDI | Identifiant de l'enquêteur ____                                                                                                                                                                                                                                                                                                                                                                                                   |
|----------------------------------------|-----------------------------------|-------------------------------------|-----------------------------------------------------------------------------------------------------------------------------------------------------------------------------------------------------------------------------------------------------------------------------------------------------------------------------------------------------------------------------------------------------------------------------------|
| STATUT                                 |                                   | Cocher un                           |                                                                                                                                                                                                                                                                                                                                                                                                                                   |
| 1=Pas à la maison                      |                                   | <input type="radio"/>               | ► Planifier nouvelle visite (date/heure)                                                                                                                                                                                                                                                                                                                                                                                          |
| 2=À la maison/ Non-répondant           |                                   | <input type="radio"/>               | ► Planifier nouvelle visite (date/heure)                                                                                                                                                                                                                                                                                                                                                                                          |
| 3=À la maison/ répondant /Indisponible |                                   | <input type="radio"/>               | ► Planifier nouvelle visite (date/heure)                                                                                                                                                                                                                                                                                                                                                                                          |
| 4= À la maison/ Répondant /Complété    |                                   | <input type="radio"/>               |                                                                                                                                                                                                                                                                                                                                                                                                                                   |
| 5= À la maison/ répondant /Refus       |                                   | <input type="radio"/>               | Notez la/les raison(s) du refus; cochez tout ce que s'applique:<br><input type="radio"/> 1=Pas de temps pour répondre aux questions<br><input type="radio"/> 2=Ne veulent pas participer/répondre aux questions<br><input type="radio"/> 3=Autre _____<br><input type="radio"/> 99=Pas de réponse <input type="radio"/> 98=Ne sait pas<br>► Visitez un ménage de remplacement le plus proche de ce ménage du côté droit ou gauche |
| 6=Inexistant/Pas une habitation        |                                   | <input type="radio"/>               | ► Visitez un ménage de remplacement le plus proche de ce ménage du côté droit ou gauche                                                                                                                                                                                                                                                                                                                                           |

|                                   |                                   |                                                                                                                                                                                                                                                                                                                                                                                                                                                                 |                                 |
|-----------------------------------|-----------------------------------|-----------------------------------------------------------------------------------------------------------------------------------------------------------------------------------------------------------------------------------------------------------------------------------------------------------------------------------------------------------------------------------------------------------------------------------------------------------------|---------------------------------|
| <b>Tentative 2</b>                | Date ____/____/____<br>(JJ/MM/AA) | Heure ____/____<br>MATIN/APRÈS-MIDI                                                                                                                                                                                                                                                                                                                                                                                                                             | Identifiant de l'enquêteur ____ |
| STATUT                            |                                   | Cocher un                                                                                                                                                                                                                                                                                                                                                                                                                                                       |                                 |
| 1=Pas à la maison                 | <input type="radio"/>             | ➡ Planifier nouvelle visite (date/heure)                                                                                                                                                                                                                                                                                                                                                                                                                        |                                 |
| 2=À la maison/Ne répond pas       | <input type="radio"/>             | ➡ Planifier nouvelle visite (date/heure)                                                                                                                                                                                                                                                                                                                                                                                                                        |                                 |
| 3=À la maison/Répond/Indisponible | <input type="radio"/>             | ➡ Planifier nouvelle visite (date/heure)                                                                                                                                                                                                                                                                                                                                                                                                                        |                                 |
| 4= À la maison/Répond/Complété    | <input type="radio"/>             |                                                                                                                                                                                                                                                                                                                                                                                                                                                                 |                                 |
| 5= À la maison/ répondant /Refus  | <input type="radio"/>             | <p>Notez la/les raison(s) du refus; cochez tout ce que s'applique:</p> <p><input type="radio"/> 1=Pas de temps pour répondre aux questions</p> <p><input type="radio"/> 2=Ne veulent pas participer/répondre aux questions</p> <p><input type="radio"/> 3=Autre _____</p> <p><input type="radio"/> 99=Pas de réponse    <input type="radio"/> 98=Ne sait pas</p> <p>➡ Visitez un ménage de remplacement le plus proche de ce ménage du côté droit ou gauche</p> |                                 |
| 6=Inexistant/Pas une habitation   | <input type="radio"/>             | ➡ Visitez un ménage de remplacement le plus proche de ce ménage du côté droit ou gauche                                                                                                                                                                                                                                                                                                                                                                         |                                 |
| <b>Tentative 3</b>                | Date ____/____/____<br>(JJ/MM/AA) | Heure ____/____<br>MATIN/APRÈS-MIDI                                                                                                                                                                                                                                                                                                                                                                                                                             | Identifiant de l'enquêteur ____ |
| STATUT                            |                                   | Cocher un                                                                                                                                                                                                                                                                                                                                                                                                                                                       |                                 |
| 1=Pas à la maison                 | <input type="radio"/>             | ➡ Visitez un ménage de remplacement le plus proche de ce ménage du côté droit ou gauche                                                                                                                                                                                                                                                                                                                                                                         |                                 |
| 2=À la maison/Ne répond pas       | <input type="radio"/>             | ➡ Visitez un ménage de remplacement le plus proche de ce ménage du côté droit ou gauche                                                                                                                                                                                                                                                                                                                                                                         |                                 |
| 3=À la maison/Répond/Indisponible | <input type="radio"/>             | ➡ Visitez un ménage de remplacement le plus proche de ce ménage du côté droit ou gauche                                                                                                                                                                                                                                                                                                                                                                         |                                 |
| 4= À la maison/Répond/Complété    | <input type="radio"/>             |                                                                                                                                                                                                                                                                                                                                                                                                                                                                 |                                 |
| 5= À la maison/ répondant /Refus  | <input type="radio"/>             | <p>Notez la/les raison(s) du refus; cochez tout ce que s'applique:</p> <p><input type="radio"/> 1=Pas de temps pour répondre aux questions</p> <p><input type="radio"/> 2=Ne veulent pas participer/répondre aux questions</p> <p><input type="radio"/> 3=Autre _____</p> <p><input type="radio"/> 99=Pas de réponse    <input type="radio"/> 98=Ne sait pas</p> <p>➡ Visitez un ménage de remplacement le plus proche de ce ménage du côté droit ou gauche</p> |                                 |
| 6=Inexistant/Pas une habitation   | <input type="radio"/>             | ➡ Visitez un ménage de remplacement le plus proche de ce ménage du côté droit ou gauche                                                                                                                                                                                                                                                                                                                                                                         |                                 |



Site \_\_\_\_ Sous-zone \_\_\_\_ Numéro d'habitation \_\_\_\_ Identifiant de l'enquêteur \_\_\_\_

## FORMULAIRE 2 – FORMULAIRE DE CONSENTEMENT

Evaluation des soins de santé à [site SETA and –pays]

### Instructions à l'enquêteur

- Lire le "Formulaire 2 – FORMULAIRE DE CONSENTEMENT" pour le répondant/demander au répondant de lire attentivement le "Formulaire 2 – FORMULAIRE DE CONSENTEMENT" s'il préfère.
- Le répondant tel que défini dans cette enquête est un adulte (ayant l'âge de la majorité spécifique au pays) membre du ménage et responsable des décisions journalières concernant la santé des membres du ménage; il ne doit pas par exemple être un voisin ou un visiteur.
- S'assurer que le répondant a pleinement compris l'objectif, les procédures, les risques et les bénéfices de cette étude avant d'obtenir son consentement à participer.
- Le répondant doit signer le "Formulaire 2 – FORMULAIRE DE CONSENTEMENT"; si le répondant est incapable de signer/analphabète, une empreinte digitale servira en lieu et place de la signature, et un adulte lettré indépendant de l'étude qui servira de témoin (un membre du même ménage ou un voisin par exemple) signera le "Formulaire 2 – FORMULAIRE DE CONSENTEMENT".
- Collecter les informations sur tous les membres du ménage indépendamment du fait qu'ils soient présents ou non au moment de l'entretien; Recueillir l'information sur seulement les individus présents au moment de l'entretien résultera en un biais dans les données.
- Remplir le "Formulaire 2 – FORMULAIRE DE CONSENTEMENT" pour chaque ménage consentant enrôlé dans l'étude.
- Expliquer au répondant qu'il est prévu de revisiter chaque ménage durant une période de 2 ans; à chaque visite, l'équipe de recherche obtiendra un nouveau consentement.
- «Site» et «sous-zone» doivent être un numéro à trois chiffres, «numéro d'habitation» un numéro à quatre chiffres, et «identifiant de l'enquêteur» un numéro à deux chiffres (utiliser les listes préparées individuellement pour chaque site pour obtenir les codes); saisir «date» au format JJ/MM/AAAA et «heure» au format HH:MM et entourer MATIN ou APRÈS-MIDI. «Étiquette de l'étude» doit être une combinaison d'un code «site» à trois chiffres, d'un code «sous-zone» à trois chiffres et d'un code «numéro d'habitation» à quatre chiffres; le «identifiant de l'enquêteur» doit être un numéro à trois chiffres.

### Investigateur principal et co-investigateur de l'étude

[Ajouter les noms de l'investigateur principal et des co-investigateurs de l'étude ainsi que leurs affiliations respectives]

### Introduction

L'Institut International des Vaccins (IVI) et [ajouter l'institution d'affiliation des investigateurs locaux] travaillent ensemble pour examiner les problèmes de santé et le comportement de santé dans votre communauté [ajouter le site SETA-pays], y compris le statu socio-économique, le comportement d'hygiène et d'assainissement et le statut vaccinal des enfants. Nous aimerions mieux comprendre où vous, votre famille et vos voisins cherchez des soins de santé en cas de maladies causant la fièvre/corps chaud et autres chate & symptômes. Cette information nous aidera à savoir à quelle fréquence vous souffrez de maladies causant de la fièvre et les autres liées à la fièvre, fournir une meilleure image des facteurs influençant la transmission de la maladie et l'infection, et à trouver des moyens pour les prévenir et traiter dans votre communauté. Vous, en tant que responsable principal pour le comportement de santé/l'utilisation des soins de santé quotidienne pour les membres de ce ménage, êtes invités à participer parce que vous vivez dans la localité où nous effectuons cette étude. Ce formulaire de consentement sera lu par vous ou pour vous et vous aurez le temps pour prendre votre décision d'accepter ou de refuser de participer à l'étude. S'il vous plaît, demandez aux membres de l'étude d'expliquer tout mot ou toute information que vous ne comprenez pas. On vous donnera en conséquence plus d'informations sur cette étude, y compris ses risques potentiels, les avantages et les inconvénients. Après vous avoir entièrement expliqué l'étude et si vous acceptez de participer, on vous demandera de signer ce formulaire de consentement au nom de tous les membres du ménage. Si vous ne pouvez pas signer le formulaire, nous vous demandons de fournir votre empreinte digitale, et une personne adulte indépendante de l'étude (membre de votre ménage/voisin) signera le formulaire en tant que témoin. Nous allons vous remettre une copie signée et datée du formulaire de consentement.

### Objectif

L'objectif de cette étude est d'examiner les problèmes de santé et l'utilisation des soins de santé dans votre communauté [ajouter le site SETA-pays], y compris le statu socio-économique et le comportement d'hygiène et d'assainissement. Notre objectif est de mieux comprendre où vous, votre famille et vos voisins cherchez les soins de santé pour des maladies causant de la fièvre/corps chaud et autres chate & symptômes. Cette

information permettra de mieux estimer le fardeau des maladies communes et d'identifier les moyens pour la mise en place de mesures de prévention et de traitement pour les maladies.

### Procédures

Nous visiterons environ [ajouter le nombre pour site d'étude et pays] ménages au total à [ajouter le site et pays] et poserons les mêmes questions dans chaque ménage. Votre ménage a été choisi pour cette étude simplement par hasard. Si vous acceptez de participer, nous vous poserons, au nom de tous les membres du ménage, quelques questions au sujet de votre ménage tels que les initiales, le sexe et l'âge de chaque membre. Nous aimerions savoir certaines informations relatives à l'éducation et l'occupation du chef de ménage, au revenu, à la possession de biens, au logement lui-même ainsi qu'à l'hygiène et à l'assainissement dans le contexte de l'hygiène personnelle, de la préparation et de la manipulation des aliments, des sources d'eau et de la manipulation, de l'élimination des déchets, de la manipulation des animaux de ferme et domestiques ainsi que de l'élevage de ce ménage. Nous allons également demander où les membres de votre ménage obtiennent les soins si quelqu'un a une maladie causant de la fièvre ou toute autre maladie et les facteurs qui peuvent influencer sur l'utilisation des soins de santé des membres du ménage (c'est-à-dire les modalités de transport, la disponibilité d'assurance maladie, les facteurs culturels) en plus du statut vaccinal et de la perception de certaines maladies. Enfin, nous allons mesurer la position géographique de votre maison. Il n'y a pas de bonnes ou de mauvaises réponses. Vous êtes libre de choisir les questions à répondre. Somme toute, il devrait prendre environ 30-45 minutes pour répondre à toutes les questions. L'entretien peut prendre un peu plus de temps s'il y a beaucoup de membres dans ce ménage. En outre, nous visiterons votre ménage deux fois en différentes saisons (une fois pendant la saison sèche et une fois vers la fin de la saison des pluies) pendant la période totale de l'étude qui est de deux ans environ pour recueillir des données comme décrit dans ce paragraphe du formulaire de consentement.

### Participation

Vous, le décideur principal pour le comportement de santé quotidienne et l'utilisation des soins de santé dans ce ménage, ainsi que les membres de votre ménage, êtes libres de choisir d'accepter ou de refuser de participer à l'étude. Il n'y a aucun problème si vous ne voulez pas participer. Il n'y a non plus aucun problème si vous voulez arrêter votre participation à tout moment, et cela ne causera aucun tort à vous ou aux membres de votre ménage. Donc, la participation à cette étude est volontaire, et vous êtes libre de refuser de participer à l'étude ou vous pouvez retirer votre consentement à tout moment sans donner de raisons et ceci n'entraînera aucune pénalité.

### Risques et avantages

La participation à cette étude n'entraîne pas de risque direct. Poser des questions au sujet de votre ménage peut mettre mal à l'aise vous ou les membres de votre ménage. Après avoir terminé les questions, l'équipe de recherche pourra fournir des informations sur les soins de santé communautaires pour les participants qui expriment de la détresse. Vous pouvez refuser de répondre à toute question à tout moment. Vous pouvez faire une pause ou arrêter de participer à cette étude à tout moment. Il n'y a pas d'avantages directs à être dans cette étude. Au cours des visites de votre ménage, notre équipe de recherche peut identifier les membres de votre ménage qui devraient chercher des soins de santé pour les maladies causant de la fièvre et autres. Par conséquent, elle peut aider à fournir de l'information sur l'offre de soins établie dans votre communauté. Les avantages indirects sont que toutes les informations collectées contribueront à fournir des données exactes sur les problèmes de santé, y compris le statu socio-économique, le comportement d'hygiène et d'assainissement et le statut vaccinal des enfants dans votre communauté. Cela aidera à donner une meilleure compréhension des facteurs influençant la transmission de la maladie et l'infection, et à estimer le fardeau des maladies courantes ainsi qu'à trouver des moyens de prévenir et de traiter les personnes dans votre communauté.

### Coûts et Compensations

Il n'a pas de coûts pour les participants de cette étude. Ni vous ni aucune personne de votre ménage ne sera indemnisée d'avoir participé.

### Confidentialité

Tous les fichiers de l'étude et de toutes les informations qui identifient vous et les membres de votre ménage seront gardées confidentielles. Tous les questionnaires sur papier seront gardés en toute sécurité et les fichiers informatisés seront protégés par un mot de passe; tous les fichiers de données (sur papier/informatisés) seront stockés pour un minimum de cinq ans; ces fichiers seront accessibles seulement à quelques personnes autorisées de l'étude. Ni votre nom ni aucun identifiant ne sera utilisé dans les publications ou les rapports de

cette étude. Les informations que nous collectons à votre sujet et au sujet des membres de votre ménage seront partagées uniquement avec le personnel de l'étude autorisé et des représentants du comité d'éthique.

### Personnes de contact pour des questions

Si vous ou des membres de votre ménage avez des questions, s'il vous plaît, demandez maintenant à l'équipe de recherche ou à tout moment plus tard en contactant [ajouter le nom de l'investigateur principal et/ou du co-investigateur, leurs affiliations respectives et les numéros de téléphone]. Si vous avez des questions sur vos droits ou ceux des membres du ménage en tant que participant à l'étude, vous pouvez contacter [ajouter le nom et les coordonnées du comité d'éthique local].

### Déclaration de consentement

Ce formulaire de consentement pour participer à l'évaluation des soins de santé et d'autres facteurs liés à la population à [ajouter le site et pays] a été bien lu par moi/pour moi. L'objectif, les procédures, les risques et les avantages ont m'ont été expliqués en détails. J'ai été autorisé à poser des questions à tout moment, et mes questions ont été répondues à ma satisfaction par l'équipe de recherche. On m'a dit la personne à contacter en cas de questions ou si je veux discuter de problèmes ou préoccupations. On m'a dit que je recevrai une copie signée et datée de ce formulaire de consentement. Je suis rassuré que toutes les informations obtenues par suite de cette étude seront gardées confidentielles et utilisées uniquement aux fins de cette étude, et seulement par les institutions participantes.

Moi, le répondant, consens, par la présente, volontairement à participer à cette étude. Je suivrai les instructions de l'équipe de recherche et donnerai mon entière collaboration. Je comprends que j'ai le droit de me retirer de l'étude à tout moment.

|                                                                                                                                                                                                                                                                                        |                                                                                                                                                                 |
|----------------------------------------------------------------------------------------------------------------------------------------------------------------------------------------------------------------------------------------------------------------------------------------|-----------------------------------------------------------------------------------------------------------------------------------------------------------------|
| <b>RÉPONDANT</b>                                                                                                                                                                                                                                                                       |                                                                                                                                                                 |
| Nom : _____<br>(prénom + deuxième prénom (si disponible) + nom de famille)                                                                                                                                                                                                             | <div style="border: 1px solid black; width: 100px; height: 100px; margin: 0 auto;"> <p style="text-align: center; margin: 0;">Empreinte du<br/>pouce</p> </div> |
| Signature : _____<br>(Représentation manuscrite du nom/ marque que la personne écrit sur un document comme une preuve d'identité)                                                                                                                                                      |                                                                                                                                                                 |
| Date ____/____/____ (YY/MM/AAAA)                                                                                                                                                                                                                                                       |                                                                                                                                                                 |
| Si le répondant ne peut pas signer/est analphabète, mais accepte de participer, enregistre l'empreinte du pouce dans la boîte ci-dessus, et demande à un témoin adulte, alphabétisé et indépendant de l'étude (par exemple membre du même ménage ou un voisin), de signer ci-dessous : |                                                                                                                                                                 |
| <b>TÉMOIN</b>                                                                                                                                                                                                                                                                          |                                                                                                                                                                 |
| Nom : _____<br>(prénom + deuxième prénom (si disponible) + nom de famille)                                                                                                                                                                                                             |                                                                                                                                                                 |
| Signature : _____<br>(Représentation manuscrite du nom/ marque que la personne écrit sur un document comme une preuve d'identité)                                                                                                                                                      |                                                                                                                                                                 |
| Date ____/____/____ (YY/MM/AAAA)                                                                                                                                                                                                                                                       |                                                                                                                                                                 |

Moi, l'enquêteur, j'ai lu/expliqué l'étude au répondant nommé ci-dessus (témoin si le répondant est analphabète) dans une langue que le répondant comprend bien. Je suis certain que le répondant a compris l'information et accepte qu'on lui pose des questions.

|                                                                                                                                   |
|-----------------------------------------------------------------------------------------------------------------------------------|
| <b>INTERVIEWER</b>                                                                                                                |
| Nom : _____<br>(prénom + deuxième prénom (si disponible) + nom de famille)                                                        |
| Signature : _____<br>(Représentation manuscrite du nom/ marque que la personne écrit sur un document comme une preuve d'identité) |
| Date ____/____/____ (YY/MM/AAAA)                                                                                                  |

Site \_\_\_\_ Sous-zone \_\_\_\_ Numéro d'habitation \_\_\_\_ Identifiant de l'enquêteur \_\_\_\_

### FORMULAIRE 3: INFORMATIONS GÉNÉRALES SUR LE MÉNAGE

#### Instructions pour l'enquêteur

- Compléter ce formulaire uniquement si la personne interrogée a consenti à participer (voir « Formulaire 2 — FORMULAIRE DE CONSENTEMENT ») ; la personne interrogée ainsi que définie pour cette enquête est un adulte (selon l'âge légal de majorité du pays), un membre du ménage et un décideur en ce qui concerne les soins de santé quotidiens et l'utilisation de soins de santé pour le ménage entier et ses membre ; il ne doit pas être, par exemple, un voisin ou un visiteur.
- Recueillir les données de tous les membres du ménage que tous les membres du ménage soient présents ou non au moment de l'entretien ; ne recueillir et n'inscrire les données que des personnes présentes au moment de l'entretien fausserait les données.
- Un ménage est défini/les membres d'un ménage sont définis comme une personne ou un groupe de personnes avec ou sans lien de parenté qui vivent ensemble dans la même unité d'habitation, qui reconnaissent un adulte de sexe masculin ou féminin comme chef de ménage, qui partagent les mêmes installations domestiques, qui sont considérés comme constituant une unité, et qui subviennent à leurs besoins en termes de nourriture et des autres éléments essentiels pour vivre.
- « Site » et « sous-zone » doivent être un numéro à trois chiffres, « numéro d'habitation » un numéro à quatre chiffres, et « identifiant de l'enquêteur » un numéro à deux chiffres (utiliser les listes préparées individuellement pour chaque site pour obtenir les codes) ; saisir « date » au format JJ/MM/AAAA et « heure » au format HH:MM et entourer MATIN ou APRÈS-MIDI. «Étiquette de l'étude» doit être une combinaison d'un code «site» à trois chiffres, d'un code «sous-zone» à trois chiffres et d'un code «numéro d'habitation» à quatre chiffres; le « identifiant de l'enquêteur » doit être un numéro à trois chiffres.

### FORMULAIRE 3: INFORMATIONS GÉNÉRALES SUR LE MÉNAGE

#### PARTIE A – DONNÉES DÉMOGRAPHIQUES/ INFORMATIONS GÉNÉRALES SUR LE MÉNAGE

##### EMPLACEMENT DU DOMICILE

#### 1 Numéros de site, de sous-zone et d'habitation

*Instructions :* Site (=site d'étude) et sous-zone (=plus petite unité du site d'étude) doivent être tous les deux des numéros à trois chiffres, et numéro d'habitation doit être un code à quatre chiffres ; utiliser les listes préparées individuellement pour obtenir les codes respectifs.

Site: \_\_\_\_ Sous-zone: \_\_\_\_ Numéro d'habitation: \_\_\_\_

#### 2 Coordonnées GPS

*Instructions :* Prendre les coordonnées GPS approximativement au centre de la maison. Inscrire l'altitude par un nombre à quatre chiffres (unité : mètre), et la latitude/longitude par un numéro à huit chiffres (unités : degrés, minutes décimales).

1=Ménage d'origine       2=Ménage de remplacement (côte droit/gauche du ménage d'origine)

Altitude: \_\_\_\_

Latitude: \_\_\_\_° \_\_\_\_'      Longitude: \_\_\_\_° \_\_\_\_'

##### PERSONNE INTERROGÉE

#### 3 Inscrire le nom complet de la personne interrogée.

*Instructions :* Inscrire le prénom, le deuxième nom (le cas échéant) et le nom de famille de la personne interrogée.

#### 4 Inscrire l'âge de la personne interrogée.

*Instruction :* Utiliser un numéro à trois chiffres (unité: année).      \_\_\_\_

#### 5 Inscrire le sexe de la personne interrogée.

1=Masculin       2=Féminin

#### 6 Quel est le lien de la personne interrogée avec le ménage ?

1=Chef de ménage       7=Conjoint du chef de ménage  
 2=Fils/fille du chef de ménage       8=Conjoint du fils/fille du chef de ménage

- 3=Frère/sœur du chef de ménage       9=Conjoint du frère/sœur du chef de ménage  
 4=Mère/père du chef de ménage       10=Belle-mère/beau-père du chef de ménage  
 5=Petite-fille/petit-fils du chef de ménage       11=Nièce/neveu du chef de ménage  
 6=Autre, préciser \_\_\_\_\_       98=Pas de réponse

### MEMBRES DU MÉNAGE

#### 7 Combien de membres du ménage vivent dans ce domicile au total (au moment de la visite) ?

*Instruction* : Utiliser un numéro à deux chiffres.

Nombre total de membres du ménage : \_\_\_\_

#### 8 Inscrire l'âge et le sexe de chaque membre du ménage.

*Instructions* : Inscrire les initiales, l'âge et le sexe de la personne interrogée en première position/ligne du tableau. Les initiales, l'âge et le sexe de tous les autres membres du ménage doivent être inscrits ensuite. Les initiales d'un membre du ménage consistent en les trois premières lettres du prénom et les trois première lettre du nom de famille (un éventuel deuxième nom ne fait pas partie des initiales). Inscrire l'âge de chaque membre du ménage avec un numéro à trois chiffres (unité : années) ; si l'âge d'un des membres du ménage  $\leq 12$  mois, inscrire 1 an comme âge. Merci de compléter un formulaire supplémentaire si le ménage a plus de vingt membres.

| Membre du ménage<br>Identifiant | Initiales<br>[prénom/nom de famille] | Âge<br>[années] | Sexe                   |
|---------------------------------|--------------------------------------|-----------------|------------------------|
| 1/Personne interrogée           | ____/____                            | ____            | O1=Masculin O2=Féminin |
| 2                               | ____/____                            | ____            | O1=Masculin O2=Féminin |
| 3                               | ____/____                            | ____            | O1=Masculin O2=Féminin |
| 4                               | ____/____                            | ____            | O1=Masculin O2=Féminin |
| 5                               | ____/____                            | ____            | O1=Masculin O2=Féminin |
| 6                               | ____/____                            | ____            | O1=Masculin O2=Féminin |
| 7                               | ____/____                            | ____            | O1=Masculin O2=Féminin |
| 8                               | ____/____                            | ____            | O1=Masculin O2=Féminin |
| 9                               | ____/____                            | ____            | O1=Masculin O2=Féminin |
| 10                              | ____/____                            | ____            | O1=Masculin O2=Féminin |
| 11                              | ____/____                            | ____            | O1=Masculin O2=Féminin |
| 12                              | ____/____                            | ____            | O1=Masculin O2=Féminin |
| 13                              | ____/____                            | ____            | O1=Masculin O2=Féminin |
| 14                              | ____/____                            | ____            | O1=Masculin O2=Féminin |
| 15                              | ____/____                            | ____            | O1=Masculin O2=Féminin |
| 16                              | ____/____                            | ____            | O1=Masculin O2=Féminin |
| 17                              | ____/____                            | ____            | O1=Masculin O2=Féminin |
| 18                              | ____/____                            | ____            | O1=Masculin O2=Féminin |
| 19                              | ____/____                            | ____            | O1=Masculin O2=Féminin |
| 20                              | ____/____                            | ____            | O1=Masculin O2=Féminin |

**FORMULAIRE 3: INFORMATIONS GÉNÉRALES SUR LE MÉNAGE**  
**PARTIE B – DONNÉES SOCIO-ECONOMIQUES**

**ÉDUCATION**

- 1 Le chef de ménage sait-il lire en [inscrire la langue officielle du site d'étude/pays] ?**  
 1=Oui       2=Non       99=Ne sait pas       98=Pas de réponse
- 2 Le chef de ménage sait-il écrire en [inscrire la langue officielle du site d'étude/pays] ?**  
 1=Oui       2=Non       99=Ne sait pas       98=Pas de réponse
- 3 Quel est le niveau d'éducation scolaire le plus élevé atteint par le chef de ménage ?**  
 1=École primaire       4=Plus élevé que le lycée       99=Ne sait pas  
 2=Collège       5= PAS D'ÉDUCATION       98=Pas de réponse  
 3=Lycée       6=Autre, préciser \_\_\_\_\_

**PROFESSION/RESSOURCES FINANCIÈRES**

**4 Quelle est la profession principale du chef de ménage ?**

*Instructions : Incrire le statut du jour de visite uniquement.*

- 1=Groupe 1 : Cadres  
 (directeurs généraux, hauts fonctionnaires, législateurs ; cadres administratifs et commerciaux ; responsables de production et de services spécialisés ; responsables dans l'hôtellerie, la vente et d'autres services)
- 2=Groupe 2 : Professionnels  
 (scientifiques ou ingénieurs ; professionnels de santé ; professionnels de l'enseignement ; professionnels de l'administration et des affaires ; professionnels de l'information et des technologies de communication ; professionnels du droit, du social ou de la culture)
- 3=Groupe 3 : Techniciens et professions intermédiaires  
 (Professions intermédiaires des sciences et techniques ; professions intermédiaires de la santé ; professions intermédiaires de l'administration et des affaires ; professions intermédiaires du droit, du social, de la culture et assimilés ; techniciens de l'information et des communications)
- 4=Groupe 4 : Employés de bureau  
 (secrétaires et dactylographes ; employé de service clientèle ; employé de conservation des données et de la documentation ; autres employés de bureau)
- 5=Groupe 5 : Travailleurs des services et de la vente  
 (travailleurs du service aux personnes ; travailleurs de la vente ; travailleurs des soins aux personnes ; travailleurs des services de protection)
- 6=Groupe 6 : Travailleurs qualifiés de l'agriculture, la sylviculture et la pêche  
 (travailleurs qualifiés de l'agriculture orientés marché ; éleveurs d'animaux ; travailleurs qualifiés de la sylviculture, la pêche et la chasse orientés marché ; agriculteurs, pêcheurs, chasseurs et cueilleurs de subsistance)
- 7=Groupe 7 : Travailleurs manuels et assimilés  
 (travailleurs de la construction et assimilés (à l'exception des électriciens) ; travailleurs de la métallurgie, sur machines et assimilés ; artisans et travailleurs de l'imprimerie ; travailleurs des métiers de l'électricité et de l'électronique ; travailleurs des métiers de la transformation des aliments, du bois, des vêtements et assimilés)
- 8=Groupe 8 : Opérateurs de machines et d'installations, et monteurs  
 (Opérateurs de machines et d'installations fixes ; monteurs ; conducteurs opérateurs d'installations mobiles)
- 9=Groupe 9 : Emplois non qualifiés  
 (agents d'entretien et assistants ; ouvriers de l'agriculture, la sylviculture et la pêche ; travailleurs des mines, de la construction, de l'industrie et des transports ; assistants à la préparation des aliments ; vendeurs et services de rue et assimilés ; travailleurs de la collecte des ordures et autres travailleurs non qualifiés)
- 10=Groupe 0 : Professions des forces armées  
 (officiers des forces armées ; sous-officiers des forces armées ; professions des forces armées, autres grades)
- 11=Autre, préciser \_\_\_\_\_
- 12=PAS DE PROFESSION       99=Ne sait pas       98=Pas de réponse

**5 Quel est le montant moyen des revenus mensuels du chef de ménage en lien avec à la profession indiquée en question 4 ainsi que celui des autres membre du ménage ?**

*Instruction* : Tick one answer per household head/enter one code per household member if applicable/if income available.

| Chef de ménage                    | Membre 1                                 | Membre 2                                                   | Membre 3                                |
|-----------------------------------|------------------------------------------|------------------------------------------------------------|-----------------------------------------|
| Code _____                        | Code _____                               | Code _____                                                 | Code _____                              |
| [1] <100USD<br>[2] ≥100 à <150USD | [3] ≥150 à <200USD<br>[4] ≥200 à <250USD | [5] ≥250USD<br>[6] PAS DE REVENU (chef de ménage; voir Q4) | [99] Ne sait pas<br>[98] Pas de réponse |

**6 Quels sont les autres sources ou les sources supplémentaires de revenus mensuels du ménage et quel en est le montant ?**

*Instruction* : Cocher plusieurs cases si nécessaire ; il peut y avoir plus d'une réponse.

| Autres sources/Sources supplémentaires                                                                                                                                                                                                                                                                                                                             | Revenus financiers mensuels globaux                                                                                                                                                                   |
|--------------------------------------------------------------------------------------------------------------------------------------------------------------------------------------------------------------------------------------------------------------------------------------------------------------------------------------------------------------------|-------------------------------------------------------------------------------------------------------------------------------------------------------------------------------------------------------|
| <input type="radio"/> 1=Aides sociales<br><input type="radio"/> 2=Assurances (publiques ou privées)<br><input type="radio"/> 3=Prêt (d'amis, de membres de la famille, d'une banque)<br><input type="radio"/> 4=Vente (bétail, récoltes, meubles, autres biens)<br><input type="radio"/> 5=Économies personnelles<br><input type="radio"/> 6=Autre, préciser _____ | <input type="radio"/> 1=<100 USD<br><input type="radio"/> 2=≥100 à <150 USD<br><input type="radio"/> 3=≥150 à <200 USD<br><input type="radio"/> 4=≥200 à <250 USD<br><input type="radio"/> 5=≥250 USD |
| <input type="radio"/> 7=PAS D'AUTRES SOURCES/DE SOURCES SUPPLÉMENTAIRES<br><input type="radio"/> 99=Ne sait pas<br><input type="radio"/> 98=Pas de réponse                                                                                                                                                                                                         |                                                                                                                                                                                                       |

**LOGEMENT/HABITATION**

**7 Les membres du ménage sont-ils propriétaires de l'habitation ?**

- 1=Oui                       3=Non, logement fourni (par le gouvernement, un employeur)                       99=Ne sait pas  
 2=Non, locataires    4=Non, autres, préciser \_\_\_\_\_                       98=Pas de réponse

**8 Combien de pièces ou structures individuelles de l'habitation sont utilisées pour dormir, vivre, faire la cuisine ou se laver ?**

*Instruction* : N'indiquer qu'un code par catégorie.

| Chambre            | Salon                | Cuisine                                 | Salle de bain |
|--------------------|----------------------|-----------------------------------------|---------------|
| Code _____         | Code _____           | Code _____                              | Code _____    |
| [1] 1-2<br>[2] 3-4 | [2] >4<br>[2] Aucune | [99] Ne sait pas<br>[98] Pas de réponse |               |

**9 En quel matériau sont construits le sol, les murs et le toit des pièces/des structures individuelles de l'habitation ?**

*Instruction* : Indiquer tous les codes par catégorie ; plus d'une réponse par catégorie est possible.

| Sol                                                                                                                                                                                                                                                   | Murs       | Toit       |
|-------------------------------------------------------------------------------------------------------------------------------------------------------------------------------------------------------------------------------------------------------|------------|------------|
| Code _____                                                                                                                                                                                                                                            | Code _____ | Code _____ |
| [1] Brique            [3] Tuiles            [5] Bois                      [7] Métal/Étain                      [99] Ne sait pas<br>[2] Ciment/Béton [4] Terre            [6] Paille/feuilles            [8] Autre, préciser _____ [98] Pas de réponse |            |            |

**10 Les membres de ce ménage ont-ils accès à/utilisent-ils l'électricité dans cette habitation ?**

- 1=Oui                       2=Non                       99=Ne sait pas                       98=Pas de réponse

**11 À quelle source de lumière principale les membres de ce ménage ont-ils accès/Quelle source de lumière principale utilisent-ils ?**

- 1=Lumière/ampoule(s) électrique(s)                       4=Lampe(s) à piles                       7= Autre, préciser \_\_\_\_\_  
 2=Lumière du soleil/Lampe(s) solaire(s)                       5=Bougie(s)                       99=Ne sait pas  
 3=Lampe(s) à pétrole/à huile                       6=PAS DE SOURCE DE LUMIÈRE                       98=Pas de réponse

**BIENS DU MÉNAGE****12 Parmi les articles suivants, lesquels les membres du ménage possèdent-ils ?**

*Instructions* : Cocher plusieurs cases si nécessaire ; il peut y avoir plus d'une réponse ; indiquer la quantité d'articles fonctionnels si nécessaire

|                                             |               |                            |                                                                 |               |                            |
|---------------------------------------------|---------------|----------------------------|-----------------------------------------------------------------|---------------|----------------------------|
| <input type="radio"/> 1=Radio               | Quantité ____ | <input type="radio"/> Rien | <input type="radio"/> 11=Lecteur cassettes/CD                   | Quantité ____ | <input type="radio"/> Rien |
| <input type="radio"/> 2=Télévision          | Quantité ____ | <input type="radio"/> Rien | <input type="radio"/> 12=Ordinateur de bureau/portable/tablette | Quantité ____ | <input type="radio"/> Rien |
| <input type="radio"/> 3=Connexion internet  | Quantité ____ | <input type="radio"/> Rien | <input type="radio"/> 13=Téléphone portable                     | Quantité ____ | <input type="radio"/> Rien |
| <input type="radio"/> 4=Voiture             | Quantité ____ | <input type="radio"/> Rien | <input type="radio"/> 14=Camion/bus                             | Quantité ____ | <input type="radio"/> Rien |
| <input type="radio"/> 5=Moto                | Quantité ____ | <input type="radio"/> Rien | <input type="radio"/> 15=Vélo                                   | Quantité ____ | <input type="radio"/> Rien |
| <input type="radio"/> 6=Char à bœufs/ânes   | Quantité ____ | <input type="radio"/> Rien | <input type="radio"/> 16=Lit                                    | Quantité ____ | <input type="radio"/> Rien |
| <input type="radio"/> 7=Matelas             | Quantité ____ | <input type="radio"/> Rien | <input type="radio"/> 17=Moustiquaire                           | Quantité ____ | <input type="radio"/> Rien |
| <input type="radio"/> 8=Table               | Quantité ____ | <input type="radio"/> Rien | <input type="radio"/> 18=Chaise                                 | Quantité ____ | <input type="radio"/> Rien |
| <input type="radio"/> 9=Réfrigérateur (4°C) | Quantité ____ | <input type="radio"/> Rien | <input type="radio"/> 19=Congélateur (-20°C)                    | Quantité ____ | <input type="radio"/> Rien |
| <input type="radio"/> 10=Ventilateur        | Quantité ____ | <input type="radio"/> Rien | <input type="radio"/> 20=Machine à coudre                       | Quantité ____ | <input type="radio"/> Rien |





- 3=Oui, cuisine intérieure/dans une pièce/structure individuelle d'habitation ; sur la propriété d'un ménage voisin (privée, partagée)  
 4=Oui, cuisine extérieure/hors d'une pièce/structure individuelle d'habitation/ en plein air ; sur la propriété d'un ménage voisin (privée, partagée)  
 5=PAS DE CUISINE  
 6=Autre, préciser \_\_\_\_\_  99=Ne sait pas  98=Pas de réponse

**6 Quelle source d'énergie les membres de ce ménage utilisent-ils habituellement pour cuisiner/préparer la nourriture/les repas ?**

- 1=Électricité  3=Charbon de bois  5=Excréments d'animaux  99=Ne sait pas  
 2=Gaz/pétrole  4=Bois/paille/feuilles  6=Autre, préciser \_\_\_\_\_  98=Pas de réponse

**7 Quelle moyen de cuisson les membres de ce ménage utilisent-ils habituellement pour cuisiner/préparer la nourriture/les repas ?**

- 1=Foyer ouvert  3=Fourneau intérieur avec cheminée  99=Ne sait pas  
 2=Fourneau extérieur  4=Autre, préciser \_\_\_\_\_  98=Pas de réponse

**8 Où les membres de ce ménage conservent-ils habituellement les produits alimentaires frais/crus (comme les légumes, la salade, les fruits, les produits laitiers, les œufs, la viande et le poisson) et les restes/les aliments/repas préparés ?**

*Instruction* : Indiquer un code par catégorie uniquement. À l'intérieur signifie à l'intérieur d'une pièce/d'une habitation individuelle/d'un bâtiment ; à l'extérieur signifie à l'extérieur d'une pièce/d'une habitation individuelle/d'un bâtiment.

| Des produits alimentaires frais/crus (légumes, salade, fruits, produits laitiers, œufs, viande et poisson)                                                                                                                                                                                                                                                                                                                                                                                                                                                                                                                                                                                                                          | Des restes/aliments/repas préparés |
|-------------------------------------------------------------------------------------------------------------------------------------------------------------------------------------------------------------------------------------------------------------------------------------------------------------------------------------------------------------------------------------------------------------------------------------------------------------------------------------------------------------------------------------------------------------------------------------------------------------------------------------------------------------------------------------------------------------------------------------|------------------------------------|
| Code _____                                                                                                                                                                                                                                                                                                                                                                                                                                                                                                                                                                                                                                                                                                                          | Code _____                         |
| [1] À température ambiante (à l'intérieur, sur la propriété du ménage, privé)<br>[2] À température ambiante (à l'extérieur, sur la propriété du ménage, privé)<br>[3] À température ambiante (à l'intérieur, sur la propriété d'un ménage voisin, privé, partagé)<br>[4] À température ambiante (à l'extérieur, sur la propriété d'un ménage voisin, privé, partagé)<br>[5] Réfrigérateur (sur la propriété du ménage, privé)<br>[6] Réfrigérateur (sur la propriété d'un ménage voisin, privé, partagé)<br>[7] Congélateur (sur la propriété du ménage, privé)<br>[8] Congélateur (sur la propriété d'un ménage voisin, privé, partagé)<br>[9] Autre, préciser _____ [10] PAS DE CONSERVATION [99] Ne sait pas [98] Pas de réponse |                                    |

**9 Si la réponse à la question 8 au sujet des produits alimentaires frais/crus et/ou des restes/aliments/repas préparés est «température ambiante», combien de temps les membres de ce ménage les conservent-ils habituellement?**

*Instruction*: Indiquer un code par catégorie uniquement.

| Des produits alimentaires frais/crus (légumes, salade, fruits, produits laitiers, œufs, viande et poisson)      | Des restes/aliments/repas préparés |
|-----------------------------------------------------------------------------------------------------------------|------------------------------------|
| Code _____                                                                                                      | Code _____                         |
| [1] <1 jour [3] 3-4 jours [5] Pas applicable [99] Ne sait pas<br>[2] 1-2 jours [4] >4 jours [98] Pas de réponse |                                    |

**10 Les membres de ce ménage couvrent-ils habituellement les restes/aliments/repas préparés? Réchauffent-ils/recuisent-ils les restes/aliments/repas préparés avant de les consommer?**

*Instruction* : Indiquer un code par catégorie uniquement.

| Couvrent les restes/les aliments/repas préparés      | Réchauffent/Recuisent les restes/les aliments/repas préparés |
|------------------------------------------------------|--------------------------------------------------------------|
| Code _____                                           | Code _____                                                   |
| [1] Oui [2] Non [99] Ne sait pas [98] Pas de réponse |                                                              |

**11 Quel membre(s) de ce ménage cuisine(s)/prépare(s) la nourriture/les repas habituellement pour les autres membres de ce ménage ?**

*Instructions :* Se référer à la question 9 du « Formulaire 3 Partie A – Données démographiques/Informations générales sur le ménage » et indiquer les initiales/ Identifiant (s) du membre.

- Membre du ménage, indiquer les initiales/identificateur(s) \_\_\_\_\_  
 99=Ne sait pas  98=Pas de réponse

**12 Comment le(s) membre(s) de la famille qui cuisine(nt)/prépare(nt) la nourriture/les repas habituellement pour les autres membres de ce ménage comme indiqué à la question 11 se prépare(nt)-t-il(s)/elle(s) habituellement avant et après la préparation des repas?**

*Instruction:* Indiquer un code par catégorie uniquement.

| Avant la préparation des repas                                                                                                                                                                                                                                 | Après la préparation des repas                                                                                                                                 |
|----------------------------------------------------------------------------------------------------------------------------------------------------------------------------------------------------------------------------------------------------------------|----------------------------------------------------------------------------------------------------------------------------------------------------------------|
| Code _____                                                                                                                                                                                                                                                     | Code _____                                                                                                                                                     |
| [1] Lavent les mains avec du savon et de l'eau<br>[2] Lavent les mains avec de l'eau uniquement<br>[3] Frottent les mains avec des feuilles/de la paille/de l'herbe<br>[4] Frottent les mains avec du sable<br>[5] Frottent les mains avec un chiffon/du tissu | [6] Ne lavent pas, pas besoin/pas sale<br>[7] Ne lavent pas, rien pour laver les mains<br>[8] Autre, préciser _____<br>[99] Ne sait pas<br>[98] Pas de réponse |

**13 Comment les membres de ce ménage se préparent-ils habituellement avant et après avoir mangé de la nourriture/des repas, y compris le membre du ménage qui cuisine/prépare la nourriture/les repas habituellement comme indiqué à la question 11?**

*Instruction :* Indiquer un code par catégorie uniquement.

| Avant la préparation des repas                                                                                                                                                                                                                                 | Après la préparation des repas                                                                                                                                 |
|----------------------------------------------------------------------------------------------------------------------------------------------------------------------------------------------------------------------------------------------------------------|----------------------------------------------------------------------------------------------------------------------------------------------------------------|
| Code _____                                                                                                                                                                                                                                                     | Code _____                                                                                                                                                     |
| [1] Lavent les mains avec du savon et de l'eau<br>[2] Lavent les mains avec de l'eau uniquement<br>[3] Frottent les mains avec des feuilles/de la paille/de l'herbe<br>[4] Frottent les mains avec du sable<br>[5] Frottent les mains avec un chiffon/du tissu | [6] Ne lavent pas, pas besoin/pas sale<br>[7] Ne lavent pas, rien pour laver les mains<br>[8] Autre, préciser _____<br>[99] Ne sait pas<br>[98] Pas de réponse |

**14 Comment les membres de ce ménage mangent-ils habituellement leur nourriture/leurs repas, y compris le membre du ménage qui cuisine/prépare la nourriture/les repas habituellement comme indiqué à la question 11?**

- 1=Avec des couverts  3=Autre, préciser \_\_\_\_\_  99=Ne sait pas  
 2=Avec les doigts  98=Pas de réponse

**15 Les membres de ce ménage mangent-ils habituellement leur nourriture/leurs repas dans le même récipient, y compris le membre du ménage qui cuisine/prépare la nourriture/les repas habituellement comme indiqué à la question 11?**

- 1=Oui  2=Non  99=Ne sait pas  98=Pas de réponse

**16 Où les membres de ce ménage obtiennent-ils habituellement leurs produits alimentaires frais/crus principaux comme les légumes, les fruits, les grains/céréales, les produits laitiers, les œufs, la viande et le poisson?**

*Instruction :* Indiquer un code par catégorie uniquement.

| Légumes, fruits, grains/céréales                                                                                                        | Produits laitiers                                                                                                                | Œufs, viande, poisson |
|-----------------------------------------------------------------------------------------------------------------------------------------|----------------------------------------------------------------------------------------------------------------------------------|-----------------------|
| Code _____                                                                                                                              | Code _____                                                                                                                       | Code _____            |
| [1] Agriculture vivrière (cour/arrière-cour)<br>[2] Supermarché/Épicerie<br>[3] Amis/famille<br>[4] Marché ouvert<br>[5] Vendeur de rue | [6] Agriculture vivrière (terre agricole)<br>[7] Boucher<br>[8] Autre, préciser _____<br>[99] Ne sait pas<br>[98] Pas de réponse |                       |



**l'habitation/de la/les structure(s) individuelle(s) d'habitation(s), les vêtements/les outils de cuisine) ?**

*Instruction* : Indiquer un code par catégorie uniquement.

| Boisson                                                                                                                                                                                                                                                                                                                                                                                                                                                                                                                                                                                                                                                                                                                                                                                                                                                                                                    | Cuisine    | Bain       | Nettoyage  |
|------------------------------------------------------------------------------------------------------------------------------------------------------------------------------------------------------------------------------------------------------------------------------------------------------------------------------------------------------------------------------------------------------------------------------------------------------------------------------------------------------------------------------------------------------------------------------------------------------------------------------------------------------------------------------------------------------------------------------------------------------------------------------------------------------------------------------------------------------------------------------------------------------------|------------|------------|------------|
| Code _____                                                                                                                                                                                                                                                                                                                                                                                                                                                                                                                                                                                                                                                                                                                                                                                                                                                                                                 | Code _____ | Code _____ | Code _____ |
| [1] Eau du robinet (à l'intérieur de l'habitation ; privée)<br>[2] Eau du robinet (à l'extérieur de l'habitation : cour/arrière-cour ; privée)<br>[3] Eau du robinet (à l'extérieur de l'habitation ; publique/partagée)<br>[4] Borne-fontaine/eau courante (à l'intérieur de l'habitation ; privée)<br>[5] Borne-fontaine/eau courante (à l'extérieur de l'habitation : cour/arrière-cour ; privée)<br>[6] Borne-fontaine/eau courante (à l'extérieur de l'habitation ; publique/partagée)<br>[7] Camion-citerne (public ; partagé)<br>[8] Eaux de surface (canal, canal d'irrigation)<br>[9] Eaux de surface (lac, étang, rivière, ruisseau)<br>[10] Eau de source<br>[11] Eau de pluie<br>[12] Puits/Puits de forage (en plein air/non couvert/non protégé)<br>[13] Puits/Puits de forage (couvert/protégé)<br>[14] Eau en bouteille<br>[15] Autre, préciser _____ [99] Ne sait pas [98] Pas de réponse |            |            |            |

**21 Les membres de ce ménage traitent-ils habituellement l'eau pour la boisson, la cuisine/la préparation des aliments/des repas, le bain, et le nettoyage (de l'habitation/des/de la structure(s) individuelle(s) d'habitation(s), des vêtements/des outils de cuisine) avant la consommation ? Comment l'eau est-elle habituellement traitée ?**

*Instruction*: Indiquer tous les codes nécessaires par catégorie ; plus d'une réponse par catégorie est possible.

| Boisson                                                                                                                                                                                                                                                                                                                                                                                                                                                                                | Cuisine    | Bain       | Nettoyage  |
|----------------------------------------------------------------------------------------------------------------------------------------------------------------------------------------------------------------------------------------------------------------------------------------------------------------------------------------------------------------------------------------------------------------------------------------------------------------------------------------|------------|------------|------------|
| Code _____                                                                                                                                                                                                                                                                                                                                                                                                                                                                             | Code _____ | Code _____ | Code _____ |
| [1] Non, pas du tout<br>[2] Non, seulement pour les malades du ménage<br>[3] Non, seulement selon la saison (saison sèche)<br>[4] Oui, par filtration (tissu, céramique, sable)<br>[5] Oui, par sédimentation<br>[6] Autre, préciser _____<br>[7] Non, seulement pour les enfants du ménage<br>[8] Non, seulement selon la saison (saison humide)<br>[9] Oui, par ébullition<br>[10] Oui, par désinfection solaire<br>[11] Oui, par chloration<br>[99] Ne sait pas [98] Pas de réponse |            |            |            |

**22 Quel(s) membre(s) de ce ménage recueille(nt) habituellement l'eau potable comme indiqué à la question 20 pour les autres membres de ce ménage ?**

*Instructions* : Se référer à la question 9 du « Formulaire 3 Partie A – Données démographiques/Informations générales sur le ménage » et indiquer/identifiant les initiales du membre.

- Membre du ménage, indiquer les initiales/identifiant(s) \_\_\_\_\_  
 99=Ne sait pas  98=Pas de réponse

**23 Comment les membres de ce ménage conservent-ils habituellement l'eau potable indiquée à la question 20?**

- |                                                                                          |                                                                                                                                   |
|------------------------------------------------------------------------------------------|-----------------------------------------------------------------------------------------------------------------------------------|
| <input type="radio"/> 1=Réservoir d'eau (non couvert)                                    | <input type="radio"/> 10=Bol (couvert par chiffon/tissu, couvercle, feuilles)                                                     |
| <input type="radio"/> 2=Réservoir d'eau (couvert par chiffon/tissu, couvercle, feuilles) | <input type="radio"/> 11=Pot en bois (non couvert)                                                                                |
| <input type="radio"/> 3=Récipient (non couvert)                                          | <input type="radio"/> 12= Pot en bois (couvert par chiffon/ tissu, couvercle, feuilles)                                           |
| <input type="radio"/> 4=Récipient (couvert par chiffon/tissu, couvercle, feuilles)       | <input type="radio"/> 13= Récipient en peau (chèvre, mouton, bovins, non couvert)                                                 |
| <input type="radio"/> 5=Pot en terre (non couvert)                                       | <input type="radio"/> 14=Récipient en peau (chèvre, mouton, bovins ; couvert par un chiffon/du tissu, un couvercle, des feuilles) |
| <input type="radio"/> 6=Pot en terre (couvert par chiffon/tissu, couvercle, feuilles)    | <input type="radio"/> 15=NON CONSERVÉE                                                                                            |
| <input type="radio"/> 7=Seau (non couvert)                                               | <input type="radio"/> 16=Autre, préciser _____                                                                                    |

- 8=Seau (couvert par chiffon/tissu, couvercle, feuilles)       99=Ne sait pas  
 9=Bol (non couvert)       98= Pas de réponse

**24 Si les membres de ce ménage utilisent une source d'approvisionnement en eau potable partagée comme indiqué à la question 20, par combien de personnes cette eau potable est-elle partagée ?**

- 1=<10 personnes       3=25-49 personnes       5=NON PARTAGÉE       99=Ne sait pas  
 2=11-24 personnes       4=>50 personnes       98=Pas de réponse

**TRAITEMENT DES DÉCHETS**

**25 Où les membres de ce ménage jettent-ils habituellement les eaux usées de, par exemple, la cuisine/la préparation des aliments/repas, le bain et/ou le ménage, et jettent-ils habituellement les déchets domestiques, les déchets humains/déjections ?**

*Instruction:* Indiquer un code par catégorie uniquement.

| Eaux usées de par exemple cuisine/préparation des aliments/repas, bain et/ou ménage                                                                                                                                                                                                                                                                                                                                                                                                                                                                                                                                                                                                                                                                                                                                                                                                                                                                                                                                                                                             | Déchets domestiques | Déchets humains/déjections |
|---------------------------------------------------------------------------------------------------------------------------------------------------------------------------------------------------------------------------------------------------------------------------------------------------------------------------------------------------------------------------------------------------------------------------------------------------------------------------------------------------------------------------------------------------------------------------------------------------------------------------------------------------------------------------------------------------------------------------------------------------------------------------------------------------------------------------------------------------------------------------------------------------------------------------------------------------------------------------------------------------------------------------------------------------------------------------------|---------------------|----------------------------|
| Code _____                                                                                                                                                                                                                                                                                                                                                                                                                                                                                                                                                                                                                                                                                                                                                                                                                                                                                                                                                                                                                                                                      | Code _____          | Code _____                 |
| [1] Sur le sol/surface libre proche de l'habitation (cour/arrière-cour, privé)<br>[2] Sur le sol/surface libre loin de l'habitation dans la communauté (partagé, public)<br>[3] Dans un trou proche de la maison (cour/arrière-cour, privé)<br>[4] Dans un trou loin de la maison dans la communauté (partagé, public)<br>[5] Versement dans des eaux de surface dans la communauté (lac, étang, rivière, ruisseau, public, partagé)<br>[6] Versement dans des eaux de surface dans la communauté (canal, canal d'irrigation, public, partagé)<br>[7] Versement dans de l'eau de source dans la communauté (public, partagé)<br>[8] Versement dans une fosse septique proche de l'habitation (cour/arrière-cour, proche de toilettes si disponibles, privé)<br>[9] Versement dans une fosse septique dans la communauté (partagé, public)<br>[10] Versement dans les égouts proches de la maison (cour/arrière-cour, privé)<br>[11] Versement dans les égouts dans la communauté (partagé, public)<br>[12] Autre, préciser _____      [99] Ne sait pas      [98] Pas de réponse |                     |                            |

**26 Les membres de ce ménage traitent-ils habituellement les déchets domestiques de la maison au préalable avant de les jeter ?**

- 1=Oui, incinération des déchets       3=NON  
 2=Oui, séparation/tri des déchets dégradables et non dégradables       4=Oui, Autre, préciser \_\_\_\_\_  
 99=Ne sait pas       98=Pas de réponse

**27 À quelle distance de la source d'approvisionnement en eau de ce ménage comme indiqué à la question 20 se trouve l'emplacement de l'élimination des eaux usées, des déchets domestiques et humains/excréments de ce ménage comme indiqué à la question 25 ?**

*Instructions :* Indiquer un code par catégorie uniquement. Indiquer la distance en mètres [m].

| Eaux usées de, par exemple, cuisine/préparation des aliments/repas, bain et/ou ménage                                                                                                  | Déchets domestiques | Déchets humains/déjections |
|----------------------------------------------------------------------------------------------------------------------------------------------------------------------------------------|---------------------|----------------------------|
| Code _____                                                                                                                                                                             | Code _____          | Code _____                 |
| [1] <5 m      [3] ≥25 à <50 m      [5] ≥100 à <500 m      [7] ≥1,000 m<br>[2] ≥5 à <25 m      [4] ≥50 à <100 m      [6] ≥500 à <1,000 m      [99] Ne sait pas      [98] Pas de réponse |                     |                            |

**28 À quelle distance de la source d'approvisionnement en eau principale de ce ménage pour la cuisine/la préparation des aliments/des repas comme indiqué à la question 20 se trouve l'emplacement de l'élimination des eaux usées, des déchets domestiques et humains/excréments de ce ménage comme indiqué à la question 25 ?**

*Instructions :* Indiquer un code par catégorie uniquement. Indiquer la distance en mètres [m].

| Eaux usées de par exemple cuisine/préparation des aliments/repas, bain et/ou ménage | Déchets domestiques | Déchets humains/excréments |
|-------------------------------------------------------------------------------------|---------------------|----------------------------|
| Code _____                                                                          | Code _____          | Code _____                 |

|                |                  |                                      |
|----------------|------------------|--------------------------------------|
| Code _____     | Code _____       | Code _____                           |
| [1] <5 m       | [3] ≥25 à <50 m  | [5] ≥100 à <500 m                    |
| [2] ≥5 à <25 m | [4] ≥50 à <100 m | [6] ≥500 à <1,000 m                  |
|                |                  | [7] ≥1,000 m                         |
|                |                  | [99] Ne sait pas [98] Pas de réponse |

### ANIMAUX DE FERME/DOMESTIQUES

#### 29 Quel genre d'animaux/de bétail et d'animaux domestiques/de compagnie les membres de ce ménage possèdent-ils ?

*Instruction* : Cocher plusieurs cases par catégorie si nécessaire ; il peut y avoir plus d'une réponse par catégorie.

| Animaux de ferme/bétail                                                                     |                                                           | Animaux domestiques/de compagnie                               |
|---------------------------------------------------------------------------------------------|-----------------------------------------------------------|----------------------------------------------------------------|
| <input type="radio"/> 1=Bovin                                                               | <input type="radio"/> 9=Chameau                           | <input type="radio"/> 1=Chien                                  |
| <input type="radio"/> 2=Mouton                                                              | <input type="radio"/> 10=Rongeurs (lapin), préciser _____ | <input type="radio"/> 2=Rongeurs (lapin), préciser _____       |
| <input type="radio"/> 3=Âne                                                                 | <input type="radio"/> 11=Chèvre                           | <input type="radio"/> 3=Chat                                   |
| <input type="radio"/> 4= Volaille (i.e. poulet, canard, pigeon, oie, dinde), préciser _____ | <input type="radio"/> 12=Cheval                           | <input type="radio"/> 4=PAS D'ANIMAUX DOMESTIQUES/DE COMPAGNIE |
| <input type="radio"/> 5=Zébu                                                                | <input type="radio"/> 13=PAS D'ANIMAUX DE FERME/DE BÉTAIL | <input type="radio"/> 5=Autre, préciser _____                  |
| <input type="radio"/> 6=Cochon                                                              | <input type="radio"/> 14=Autre, préciser _____            | <input type="radio"/> 99=Ne sait pas                           |
| <input type="radio"/> 7=Poisson                                                             | <input type="radio"/> 99=Ne sait pas                      | <input type="radio"/> 98=Pas de réponse                        |
| <input type="radio"/> 8=Buffle                                                              | <input type="radio"/> 98=Pas de réponse                   |                                                                |

#### 30 Où les membres de ce ménage gardent-ils habituellement les animaux de ferme/le bétail et les animaux domestiques/de compagnie de ce ménage comme indiqué à la question 29 ?

*Instruction* : Indiquer un code par catégorie uniquement.

| Animaux de ferme/bétail                                                                                                              | Animaux domestiques/de compagnie                                                                 |
|--------------------------------------------------------------------------------------------------------------------------------------|--------------------------------------------------------------------------------------------------|
| <input type="radio"/> 1=Étable/Cage/Bassin d'eau sur la propriété de l'habitation (arrière-cour/cour)                                | <input type="radio"/> 1=Cage/Chaîne proche de l'habitation (arrière-cour/cour)                   |
| <input type="radio"/> 2=Étable/Cage/Bassin d'eau à l'extérieur de l'habitation dans la communauté                                    | <input type="radio"/> 2= Cage/Chaîne à l'extérieur de l'habitation dans la communauté            |
| <input type="radio"/> 3=Étable/Cage/Bassin d'eau à l'extérieur de la communauté                                                      | <input type="radio"/> 3= Cage/Chaîne à l'extérieur de la communauté (public)                     |
| <input type="radio"/> 4=Surface libre/Eaux de surface/Eau de source sur la propriété de l'habitation (habitation, arrière-cour/cour) | <input type="radio"/> 4=Surface libre proche de l'habitation (dans la maison, arrière-cour/cour) |
| <input type="radio"/> 5=Surface libre/Eaux de surface/Eau de source à l'extérieur de l'habitation dans la communauté                 | <input type="radio"/> 5=Surface libre à l'extérieur de l'habitation dans la communauté           |
| <input type="radio"/> 6=Surface libre/Eaux de surface/Eau de source à l'extérieur de la communauté                                   | <input type="radio"/> 6=Surface libre à l'extérieur de la communauté                             |
| <input type="radio"/> 7=Pas applicable (nulle part /pas d'animaux de ferme/bétail)                                                   | <input type="radio"/> 7=Pas applicable (nulle part/pas d'animaux domestiques/de compagnie)       |
| <input type="radio"/> 8=Autre, préciser _____                                                                                        | <input type="radio"/> 8=Autre, préciser _____                                                    |
| <input type="radio"/> 99=Ne sait pas                                                                                                 | <input type="radio"/> 99=Ne sait pas                                                             |
| <input type="radio"/> 98=Pas de réponse                                                                                              | <input type="radio"/> 98=Pas de réponse                                                          |

#### 31 Quelle est l'importance de l'élevage que les membres de ce ménage pratiquent ?

- |                                                                               |                                               |
|-------------------------------------------------------------------------------|-----------------------------------------------|
| <input type="radio"/> 1=Pour leurs propres besoins («élevage d'arrière-cour») | <input type="radio"/> 4=Autre, préciser _____ |
| <input type="radio"/> 2=Pas applicable (pas d'élevage)                        | <input type="radio"/> 99=Ne sait pas          |
| <input type="radio"/> 3=3=Demande massive/industrielle («élevage intensif»)   | <input type="radio"/> 98=Pas de réponse       |

**32 Quel approvisionnement en eau les membres de ce ménage utilisent-ils pour fournir de l'eau aux animaux de ferme/au bétail et aux animaux domestiques/de compagnie de ce ménage comme indiqué à la question 29 ?**

*Instruction* : Indiquer un code par catégorie uniquement.

| Animaux de ferme/bétail                                                                                                                                                                                                                                                                                                                                                                                                                                                                                                                                                                                                                                                                                                                                                                                                                                                                                                                                                          | Animaux domestiques/de compagnie |
|----------------------------------------------------------------------------------------------------------------------------------------------------------------------------------------------------------------------------------------------------------------------------------------------------------------------------------------------------------------------------------------------------------------------------------------------------------------------------------------------------------------------------------------------------------------------------------------------------------------------------------------------------------------------------------------------------------------------------------------------------------------------------------------------------------------------------------------------------------------------------------------------------------------------------------------------------------------------------------|----------------------------------|
| Code _____                                                                                                                                                                                                                                                                                                                                                                                                                                                                                                                                                                                                                                                                                                                                                                                                                                                                                                                                                                       | Code _____                       |
| [1] Eau du robinet (à l'intérieur de l'habitation ; privée)<br>[2] Eau du robinet (à l'extérieur de l'habitation : cour/arrière-cour ; privée)<br>[3] Eau du robinet (à l'extérieur de l'habitation ; publique/partagée)<br>[4] Borne-fontaine/eau courante (à l'intérieur de l'habitation ; privée)<br>[5] Borne-fontaine/eau courante (à l'extérieur de l'habitation : cour/arrière-cour ; privée)<br>[6] Borne-fontaine/eau courante (à l'extérieur de l'habitation ; publique/partagée)<br>[7] Camion-citerne (public ; partagé)<br>[8] Eaux de surface (canal, canal d'irrigation)<br>[9] Eaux de surface (lac, étang, rivière, ruisseau)<br>[10] Eau de source<br>[11] Eau de pluie<br>[12] Puits/Puits de forage (en plein air/non couvert/non protégé)<br>[13] Puits/Puits de forage (couvert/protégé)<br>[14] Pas applicable (pas d'animaux de ferme/bétail; pas d'animaux domestiques/de compagnie)<br>[15] Autre, préciser _____ [99] Ne sait pas [98] Pas de réponse |                                  |

**33 Les membres de ce ménage se lavent-ils habituellement les mains après avoir nourri, donné de l'eau et nettoyé l'étable/la cage/le bassin d'eau des animaux de ferme/du bétail de ce ménage comme indiqué à la question 29 ?**

*Instruction* : Indiquer un code par catégorie uniquement.

| Animaux de ferme/bétail                                                                                                                                                                                                                                                                                                                                                                                                                                                                                                      | Animaux domestiques/de compagnie |
|------------------------------------------------------------------------------------------------------------------------------------------------------------------------------------------------------------------------------------------------------------------------------------------------------------------------------------------------------------------------------------------------------------------------------------------------------------------------------------------------------------------------------|----------------------------------|
| Code _____                                                                                                                                                                                                                                                                                                                                                                                                                                                                                                                   | Code _____                       |
| [1] Lavent les mains avec du savon et de l'eau<br>[2] Lavent les mains avec de l'eau uniquement<br>[3] Frottent les mains avec des feuilles/de la paille/de l'herbe<br>[4] Frottent les mains avec du sable<br>[5] Frottent les mains avec un chiffon/du tissu<br>[6] Ne lavent pas, pas besoin/pas sale<br>[7] Ne lavent pas, rien pour laver les mains<br>[8] Autre, préciser _____<br>[9] Pas applicable (pas d'animaux de ferme/bétail ; pas d'animaux domestiques/de compagnie)<br>[99] Ne sait pas [98] Pas de réponse |                                  |

**CULTURES AGRICOLES**

**34 Quel genre de cultures les membres de ce ménage font-ils pousser/cultivent-ils ?**

*Instruction* : Cocher plusieurs cases si nécessaire ; il peut y avoir plus d'une réponse.

- |                                                                      |                                                |
|----------------------------------------------------------------------|------------------------------------------------|
| <input type="radio"/> 1=Café                                         | <input type="radio"/> 10=Tabac                 |
| <input type="radio"/> 2=Riz                                          | <input type="radio"/> 11=Canne à Sucre         |
| <input type="radio"/> 3=Fruits (cultivés sur arbustes/arbre)         | <input type="radio"/> 12=Chad/Chat             |
| <input type="radio"/> 4=Fruits (cultivés au sol)                     | <input type="radio"/> 13=Bees/Honey            |
| <input type="radio"/> 5=Légumes/salade (cultivés sur arbustes/arbre) | <input type="radio"/> 14=Coton                 |
| <input type="radio"/> 6=Légumes/salade (cultivés au sol)             | <input type="radio"/> 15=PAS DE CULTURES       |
| <input type="radio"/> 7=Céréales (blé, orge, avoine, maïs)           | <input type="radio"/> 16=Autre, préciser _____ |
| <input type="radio"/> 8=Thé                                          | <input type="radio"/> 99=Ne sait pas           |
| <input type="radio"/> 9=Noix de cajou                                | <input type="radio"/> 98=Pas de réponse        |

**35 Où les champs/terres agricoles des membres de ce ménage se situent-ils/elles?**

- |                                                                             |                                                            |
|-----------------------------------------------------------------------------|------------------------------------------------------------|
| <input type="radio"/> 1=On the property of the house (i.e. back-/courtyard) | <input type="radio"/> 4=Outside the house in the community |
| <input type="radio"/> 2=Outside the community                               | <input type="radio"/> 5=Not applicable (no crop farming)   |
| <input type="radio"/> 3=Other, specify _____                                | <input type="radio"/> 99=Don't know                        |
|                                                                             | <input type="radio"/> 98=No response                       |



**36 Quelle est l'importance des cultures des membres de ce ménage?**

- 1=Leurs propres besoins (« agriculture d'arrière-cour »)       4=Autre, préciser \_\_\_\_\_  
 2=Pas applicable (pas de cultures)       99=Ne sait pas  
 3=Demande massive/industrielle (agriculture intensive)       98= Pas de réponse

**37 Les membres de ce ménage utilisent-ils habituellement des herbicides, pesticides et engrais pour les cultures indiquées à la question 34?**

*Instruction* : Indiquer un code par catégorie uniquement.

| Herbicides                                               | Pesticides                                               | Engrais                                                  |
|----------------------------------------------------------|----------------------------------------------------------|----------------------------------------------------------|
| <input type="radio"/> 1=Oui, préciser l'herbicide        | <input type="radio"/> 1=Oui, préciser le pesticide       | <input type="radio"/> 1=Oui, préciser l'engrais          |
| <input type="radio"/> 2=Pas applicable (pas de cultures) | <input type="radio"/> 2=Pas applicable (pas de cultures) | <input type="radio"/> 2=Pas applicable (pas de cultures) |
| <input type="radio"/> 3=Pas d'utilisation des herbicides | <input type="radio"/> 3=Pas d'utilisation des pesticides | <input type="radio"/> 3=Pas d'utilisation des engrais    |
| <input type="radio"/> 99=Ne sait pas                     | <input type="radio"/> 99=Ne sait pas                     | <input type="radio"/> 99=Ne sait pas                     |
| <input type="radio"/> 98=Pas de réponse                  | <input type="radio"/> 98=Pas de réponse                  | <input type="radio"/> 98=Pas de réponse                  |

**38 Les membres de ce ménage se lavent-ils les mains après avoir travaillé dans les terres agricoles pour les cultures indiquées à la question 34 ?**

- 1=Oui, se lavent les mains avec du savon et de l'eau       6=Oui, se frottent les mains avec du sable  
 2=Oui, se frottent les mains avec des feuilles/de la paille/de l'herbe       7=Non, ne se lavent pas les mains  
 3=Oui, se frottent les mains avec des chiffons/du tissu       8=Autre, préciser \_\_\_\_\_  
 4=Pas applicable (pas de cultures)       99=Ne sait pas  
 5=Oui, se lavent les mains avec de l'eau uniquement       98= Pas de réponse

Site \_\_\_\_ Sous-zone \_\_\_\_ Numéro d'habitation \_\_\_\_ Identifiant de l'enquêteur \_\_\_\_

**FORMULAIRE 4: ÉVALUATION DE L'UTILISATION GÉNÉRIQUE DES SOINS DE SANTÉ  
GLOBAUX, STRATIFIÉE SELON L'ÂGE ET LE SEXE  
Partie A –Évaluation de l'utilisation *générique* des soins de santé**

**Instructions pour l'enquêteur**

- Compléter ce formulaire uniquement si la personne interrogée a consenti à participer (voir « Formulaire 2 — FORMULAIRE DE CONSENTEMENT ») ; la personne interrogée ainsi que définie pour cette enquête est un adulte (selon l'âge légal de majorité du pays), un membre du ménage et un décideur en ce qui concerne les soins de santé quotidiens et l'utilisation de soins de santé pour le ménage entier et ses membres ; il ne doit pas être, par exemple, un voisin ou un visiteur.
- Se référer à « Formulaire 3 — Partie A — Informations générales sur le ménage » comme référence pour obtenir le nombre total de membres du ménage ainsi que l'âge et le sexe de chaque membre du ménage.
- Recueillir les données de tous les membres du ménage que tous les membre du ménage soient présents ou non au moment de l'entretien ; ne recueillir et n'inscrire les données que des personnes présentes au moment de l'entretien fausserait les données.
- Un ménage est défini/les membres d'un ménage sont définis comme une personne ou un groupe de personnes avec ou sans lien de parenté qui vivent ensemble dans la même unité d'habitation, qui reconnaissent un adulte de sexe masculin ou féminin comme chef de ménage, qui partagent les mêmes installations domestiques, qui sont considérés comme constituant une unité, et qui subviennent à leurs besoins en termes de nourriture et des autres éléments essentiels pour vivre.
- « Site » et « sous-zone » doivent être un numéro à trois chiffres, « numéro d'habitation » un numéro à quatre chiffres, et « identifiant de l'enquêteur » un numéro à deux chiffres (utiliser les listes préparées individuellement pour chaque site pour obtenir les codes) ; saisir « date » au format JJ/MM/AAAA et « heure » au format HH:MM et entourer MATIN ou APRÈS-MIDI. «Étiquette de l'étude» doit être une combinaison d'un code «site» à trois chiffres, d'un code «sous-zone» à trois chiffres et d'un code «numéro d'habitation» à quatre chiffres; le « identifiant de l'enquêteur » doit être un numéro à trois chiffres.
- Abréviation : EDS = Établissement de santé public/privé primaire/secondaire/tertiaire.

**MEMBRES DU MÉNAGE**

**1 Indiquer le nombre total de membres du ménage de cette habitation (au jour de la visite).**

*Instructions :* Le nombre total de membres du ménage doit être indiqué à l'aide d'un numéro à 2 chiffres ; voir également « Formulaire 3 — Partie A — INFORMATIONS GÉNÉRALES SUR LE MÉNAGE ».

Nombre total de membres du ménage : \_\_\_\_

**2 Indiquer le nombre de membres FÉMININS du ménage pour chacun des groupes d'âge suivants :**

*Instructions :* Le nombre total de membres féminins du ménage par groupe d'âge doit être indiqué à l'aide d'un numéro à 2 chiffres ; voir également « Formulaire 3 — Partie A — INFORMATIONS GÉNÉRALES SUR LE MÉNAGE ».

<2 ans : \_\_\_\_ ≥2 à <5 ans : \_\_\_\_ ≥5 à <15 ans : \_\_\_\_ ≥15 ans : \_\_\_\_

**3 Indiquer le nombre de membres MASCULINS du ménage pour chacun des groupes d'âge suivants :**

*Instructions :* Le nombre total de membres masculins du ménage par groupe d'âge doit être indiqué à l'aide d'un numéro à 2 chiffres ; voir également « Formulaire 3 — Partie A — INFORMATIONS GÉNÉRALES SUR LE MÉNAGE ».

<2 ans : \_\_\_\_ ≥2 à <5 ans : \_\_\_\_ ≥5 à <15 ans : \_\_\_\_ ≥15 ans : \_\_\_\_

**COMPORTEMENT DE RECHERCHE DE SOINS DE SANTÉ**

**4 Indiquer où les membres féminins/masculins du foyer d'âges <2 ans/≥2 à <5 ans/≥5 à <15 ans/≥15 ans recherchent habituellement des soins de santé pour les signes/symptômes suivants. Merci d'attribuer une note entre 1 et 4.**

*Instructions :*

- Compléter la question 4 séparément pour les membres du ménage féminins et masculins d'âge <2 ans, ≥2 à <5 ans, ≥5 à <15 ans et ≥15 ans et entoure le sexe et le groupe d'âge pour lequel Q4 a été complétée; passer la question 4 s'il n'y a aucun membre féminin/masculin du ménage d'âge <2 ans/ ≥2 à <5 ans/ ≥5 à <15 ans/ ≥15 ans.
- Indiquer une réponse pour chaque choix de soins de santé pour chaque signe/symptôme; attribuer une note de 1 à 4 (1=1<sup>er</sup> choix; 2=2<sup>ème</sup> choix; 3=3<sup>ème</sup> choix; 4=non choisi); indiquer un code s'il y a lieu en utilisant les listes préparées (utiliser listes préparées individuellement pour chaque site pour obtenir les codes); cocher «Ne sait pas» s'il y a lieu.

| Signe/Symptôme                                                  | Choix de soins de santé  |      |                          |      |                          |           |                          |                            |                          |                       |
|-----------------------------------------------------------------|--------------------------|------|--------------------------|------|--------------------------|-----------|--------------------------|----------------------------|--------------------------|-----------------------|
|                                                                 | EDS SETA                 |      | Autre EDS                |      | Médecin                  | Pharmacie | Guérisseur traditionnel  | Nulle part Auto-médication | Nulle part Rien          | Ne sait pas           |
|                                                                 | Note                     | Code | Note                     | Code | Note                     | Note      | Note                     | Note                       | Note                     | Cocher                |
| <b>1 [A] Fièvre</b>                                             | O=1<br>O=2<br>O=3<br>O=4 |      | O=1<br>O=2<br>O=3<br>O=4 |      | O=1<br>O=2<br>O=3<br>O=4 |           | O=1<br>O=2<br>O=3<br>O=4 |                            | O=1<br>O=2<br>O=3<br>O=4 | <input type="radio"/> |
| <b>2 Fièvre &lt;3 jours (continus)</b>                          | O=1<br>O=2<br>O=3<br>O=4 |      | O=1<br>O=2<br>O=3<br>O=4 |      | O=1<br>O=2<br>O=3<br>O=4 |           | O=1<br>O=2<br>O=3<br>O=4 |                            | O=1<br>O=2<br>O=3<br>O=4 | <input type="radio"/> |
| <b>3 Fièvre ≥3 jours (continus)</b>                             | O=1<br>O=2<br>O=3<br>O=4 |      | O=1<br>O=2<br>O=3<br>O=4 |      | O=1<br>O=2<br>O=3<br>O=4 |           | O=1<br>O=2<br>O=3<br>O=4 |                            | O=1<br>O=2<br>O=3<br>O=4 | <input type="radio"/> |
| <b>4 Frissons<br/>Tremblements</b>                              | O=1<br>O=2<br>O=3<br>O=4 |      | O=1<br>O=2<br>O=3<br>O=4 |      | O=1<br>O=2<br>O=3<br>O=4 |           | O=1<br>O=2<br>O=3<br>O=4 |                            | O=1<br>O=2<br>O=3<br>O=4 | <input type="radio"/> |
| <b>5 Convulsion</b>                                             | O=1<br>O=2<br>O=3<br>O=4 |      | O=1<br>O=2<br>O=3<br>O=4 |      | O=1<br>O=2<br>O=3<br>O=4 |           | O=1<br>O=2<br>O=3<br>O=4 |                            | O=1<br>O=2<br>O=3<br>O=4 | <input type="radio"/> |
| <b>6 Perte de poids</b>                                         | O=1<br>O=2<br>O=3<br>O=4 |      | O=1<br>O=2<br>O=3<br>O=4 |      | O=1<br>O=2<br>O=3<br>O=4 |           | O=1<br>O=2<br>O=3<br>O=4 |                            | O=1<br>O=2<br>O=3<br>O=4 | <input type="radio"/> |
| <b>7 Déshydratation</b>                                         | O=1<br>O=2<br>O=3<br>O=4 |      | O=1<br>O=2<br>O=3<br>O=4 |      | O=1<br>O=2<br>O=3<br>O=4 |           | O=1<br>O=2<br>O=3<br>O=4 |                            | O=1<br>O=2<br>O=3<br>O=4 | <input type="radio"/> |
| <b>8 Malaise<br/>Faiblesse/ Fatigue</b>                         | O=1<br>O=2<br>O=3<br>O=4 |      | O=1<br>O=2<br>O=3<br>O=4 |      | O=1<br>O=2<br>O=3<br>O=4 |           | O=1<br>O=2<br>O=3<br>O=4 |                            | O=1<br>O=2<br>O=3<br>O=4 | <input type="radio"/> |
| <b>9 Douleurs<br/>(muscles/articulations /os)</b>               | O=1<br>O=2<br>O=3<br>O=4 |      | O=1<br>O=2<br>O=3<br>O=4 |      | O=1<br>O=2<br>O=3<br>O=4 |           | O=1<br>O=2<br>O=3<br>O=4 |                            | O=1<br>O=2<br>O=3<br>O=4 | <input type="radio"/> |
| <b>10 Maux de tête</b>                                          | O=1<br>O=2<br>O=3<br>O=4 |      | O=1<br>O=2<br>O=3<br>O=4 |      | O=1<br>O=2<br>O=3<br>O=4 |           | O=1<br>O=2<br>O=3<br>O=4 |                            | O=1<br>O=2<br>O=3<br>O=4 | <input type="radio"/> |
| <b>11 Vertiges/<br/>Confusion<br/>Perte de<br/>connaissance</b> | O=1<br>O=2<br>O=3<br>O=4 |      | O=1<br>O=2<br>O=3<br>O=4 |      | O=1<br>O=2<br>O=3<br>O=4 |           | O=1<br>O=2<br>O=3<br>O=4 |                            | O=1<br>O=2<br>O=3<br>O=4 | <input type="radio"/> |
| <b>12 Troubles de la<br/>pression artérielle</b>                | O=1<br>O=2<br>O=3<br>O=4 |      | O=1<br>O=2<br>O=3<br>O=4 |      | O=1<br>O=2<br>O=3<br>O=4 |           | O=1<br>O=2<br>O=3<br>O=4 |                            | O=1<br>O=2<br>O=3<br>O=4 | <input type="radio"/> |
| <b>13 Troubles<br/>cardiaques</b>                               | O=1<br>O=2<br>O=3<br>O=4 |      | O=1<br>O=2<br>O=3<br>O=4 |      | O=1<br>O=2<br>O=3<br>O=4 |           | O=1<br>O=2<br>O=3<br>O=4 |                            | O=1<br>O=2<br>O=3<br>O=4 | <input type="radio"/> |

| Signe/Symptôme                                                                                  | Choix de soins de santé |      |           |      |         |           |                         |                            |                 |             |
|-------------------------------------------------------------------------------------------------|-------------------------|------|-----------|------|---------|-----------|-------------------------|----------------------------|-----------------|-------------|
|                                                                                                 | EDS SETA                |      | Autre EDS |      | Médecin | Pharmacie | Guérisseur traditionnel | Nulle part Auto-médication | Nulle part Rien | Ne sait pas |
|                                                                                                 | Note                    | Code | Note      | Code | Note    | Note      | Note                    | Note                       | Note            | Cocher      |
| <b>14</b> Nausée<br>Vomissements                                                                | O=1                     |      | O=1       |      | O=1     | O=1       | O=1                     | O=1                        | O=1             | ○           |
|                                                                                                 | O=2                     |      | O=2       |      | O=2     | O=2       | O=2                     | O=2                        | O=2             |             |
|                                                                                                 | O=3                     |      | O=3       |      | O=3     | O=3       | O=3                     | O=3                        | O=3             |             |
|                                                                                                 | O=4                     |      | O=4       |      | O=4     | O=4       | O=4                     | O=4                        | O=4             |             |
| <b>15</b> Diarrhée<br>(liquide/sanglante/<br>mucopurulente)                                     | O=1                     |      | O=1       |      | O=1     | O=1       | O=1                     | O=1                        | O=1             | ○           |
|                                                                                                 | O=2                     |      | O=2       |      | O=2     | O=2       | O=2                     | O=2                        | O=2             |             |
|                                                                                                 | O=3                     |      | O=3       |      | O=3     | O=3       | O=3                     | O=3                        | O=3             |             |
|                                                                                                 | O=4                     |      | O=4       |      | O=4     | O=4       | O=4                     | O=4                        | O=4             |             |
| <b>16</b> Douleur<br>abdominale<br>Douleur intestinale                                          | O=1                     |      | O=1       |      | O=1     | O=1       | O=1                     | O=1                        | O=1             | ○           |
|                                                                                                 | O=2                     |      | O=2       |      | O=2     | O=2       | O=2                     | O=2                        | O=2             |             |
|                                                                                                 | O=3                     |      | O=3       |      | O=3     | O=3       | O=3                     | O=3                        | O=3             |             |
|                                                                                                 | O=4                     |      | O=4       |      | O=4     | O=4       | O=4                     | O=4                        | O=4             |             |
| <b>17</b> Perte de sang/<br>Hémorragie<br>(interne)                                             | O=1                     |      | O=1       |      | O=1     | O=1       | O=1                     | O=1                        | O=1             | ○           |
|                                                                                                 | O=2                     |      | O=2       |      | O=2     | O=2       | O=2                     | O=2                        | O=2             |             |
|                                                                                                 | O=3                     |      | O=3       |      | O=3     | O=3       | O=3                     | O=3                        | O=3             |             |
|                                                                                                 | O=4                     |      | O=4       |      | O=4     | O=4       | O=4                     | O=4                        | O=4             |             |
| <b>18</b> Perte de sang/<br>Hémorragie<br>(externe)                                             | O=1                     |      | O=1       |      | O=1     | O=1       | O=1                     | O=1                        | O=1             | ○           |
|                                                                                                 | O=2                     |      | O=2       |      | O=2     | O=2       | O=2                     | O=2                        | O=2             |             |
|                                                                                                 | O=3                     |      | O=3       |      | O=3     | O=3       | O=3                     | O=3                        | O=3             |             |
|                                                                                                 | O=4                     |      | O=4       |      | O=4     | O=4       | O=4                     | O=4                        | O=4             |             |
| <b>19</b> Éternuements<br>Nez qui coule                                                         | O=1                     |      | O=1       |      | O=1     | O=1       | O=1                     | O=1                        | O=1             | ○           |
|                                                                                                 | O=2                     |      | O=2       |      | O=2     | O=2       | O=2                     | O=2                        | O=2             |             |
|                                                                                                 | O=3                     |      | O=3       |      | O=3     | O=3       | O=3                     | O=3                        | O=3             |             |
|                                                                                                 | O=4                     |      | O=4       |      | O=4     | O=4       | O=4                     | O=4                        | O=4             |             |
| <b>20</b> Toux                                                                                  | O=1                     |      | O=1       |      | O=1     | O=1       | O=1                     | O=1                        | O=1             | ○           |
|                                                                                                 | O=2                     |      | O=2       |      | O=2     | O=2       | O=2                     | O=2                        | O=2             |             |
|                                                                                                 | O=3                     |      | O=3       |      | O=3     | O=3       | O=3                     | O=3                        | O=3             |             |
|                                                                                                 | O=4                     |      | O=4       |      | O=4     | O=4       | O=4                     | O=4                        | O=4             |             |
| <b>21</b> Respiration<br>rapide/<br>essoufflement                                               | O=1                     |      | O=1       |      | O=1     | O=1       | O=1                     | O=1                        | O=1             | ○           |
|                                                                                                 | O=2                     |      | O=2       |      | O=2     | O=2       | O=2                     | O=2                        | O=2             |             |
|                                                                                                 | O=3                     |      | O=3       |      | O=3     | O=3       | O=3                     | O=3                        | O=3             |             |
|                                                                                                 | O=4                     |      | O=4       |      | O=4     | O=4       | O=4                     | O=4                        | O=4             |             |
| <b>22</b> Difficultés<br>respiratoires<br>graves                                                | O=1                     |      | O=1       |      | O=1     | O=1       | O=1                     | O=1                        | O=1             | ○           |
|                                                                                                 | O=2                     |      | O=2       |      | O=2     | O=2       | O=2                     | O=2                        | O=2             |             |
|                                                                                                 | O=3                     |      | O=3       |      | O=3     | O=3       | O=3                     | O=3                        | O=3             |             |
|                                                                                                 | O=4                     |      | O=4       |      | O=4     | O=4       | O=4                     | O=4                        | O=4             |             |
| <b>23</b> Inflammation<br>de la peau<br>(éruptions cutanées/<br>rougeurs/pus/<br>démangeaisons) | O=1                     |      | O=1       |      | O=1     | O=1       | O=1                     | O=1                        | O=1             | ○           |
|                                                                                                 | O=2                     |      | O=2       |      | O=2     | O=2       | O=2                     | O=2                        | O=2             |             |
|                                                                                                 | O=3                     |      | O=3       |      | O=3     | O=3       | O=3                     | O=3                        | O=3             |             |
|                                                                                                 | O=4                     |      | O=4       |      | O=4     | O=4       | O=4                     | O=4                        | O=4             |             |
| <b>24</b> Gonflement/<br>Œdème                                                                  | O=1                     |      | O=1       |      | O=1     | O=1       | O=1                     | O=1                        | O=1             | ○           |
|                                                                                                 | O=2                     |      | O=2       |      | O=2     | O=2       | O=2                     | O=2                        | O=2             |             |
|                                                                                                 | O=3                     |      | O=3       |      | O=3     | O=3       | O=3                     | O=3                        | O=3             |             |
|                                                                                                 | O=4                     |      | O=4       |      | O=4     | O=4       | O=4                     | O=4                        | O=4             |             |
| <b>25</b> Jaunisse                                                                              | O=1                     |      | O=1       |      | O=1     | O=1       | O=1                     | O=1                        | O=1             | ○           |
|                                                                                                 | O=2                     |      | O=2       |      | O=2     | O=2       | O=2                     | O=2                        | O=2             |             |
|                                                                                                 | O=3                     |      | O=3       |      | O=3     | O=3       | O=3                     | O=3                        | O=3             |             |
|                                                                                                 | O=4                     |      | O=4       |      | O=4     | O=4       | O=4                     | O=4                        | O=4             |             |

Site \_\_\_\_ Sous-zone \_\_\_\_ Numéro d'habitation \_\_\_\_ Identifiant de l'enquêteur \_\_\_\_

## FORMULAIRE 4: ÉVALUATION DE L'UTILISATION GÉNÉRIQUE DES SOINS DE SANTÉ GLOBAUX, STRATIFIÉE SELON L'ÂGE ET LE SEXE

### Partie B – Facteurs associés aux soins de santé/Vaccination/Percéption de la maladie

#### DÉPLACEMENT À L'ÉTABLISSEMENT DE SANTÉ

- 1 Au cas où un établissement de santé (EDS) a été noté comme 1<sup>er</sup> choix de soins à la question 4A (fièvre), quel est habituellement le moyen de transport principal, le temps de trajet (selon le moyen de transport), le coût du trajet (selon le moyen de transport) et la distance du trajet (selon le moyen de transport) pour s'y rendre ?**

*Instructions* : Indiquer uniquement un code par catégorie, sexe ainsi que groupe d'âge. Passer cette question s'il n'y a pas de membre féminin/masculin d'âge <2 ans/≥2 à <5 ans/≥5 à <15 ans/≥15 ans dans ce ménage (voir également questions 2 et 3 de ce formulaire Partie A). Passer cette question si aucun EDS n'a été noté comme 1<sup>er</sup> choix de soins à la question 4A pour les membres masculins/féminins d'âge <2 ans/≥2 à <5 ans/≥5 à <15 ans/≥15 ans. Indiquer le temps de trajet en minute(s) [min]/ heure(s) [h], le coût total en USD, y compris les cadeaux éventuels, les aides financières et les dons, et la distance totale en mètre(s) [m]/kilomètre(s) [km].

| Membre féminin                                        |             |                      |           | Membre masculin          |             |                     |           |
|-------------------------------------------------------|-------------|----------------------|-----------|--------------------------|-------------|---------------------|-----------|
| <2 ans                                                | ≥2 à <5 ans | ≥5 à <15 ans         | ≥15 ans   | <2 ans                   | ≥2 à <5 ans | ≥5 à <15 ans        | ≥15 ans   |
| <b>1.1 Moyen de transport</b>                         |             |                      |           |                          |             |                     |           |
| Code ____                                             | Code ____   | Code ____            | Code ____ | Code ____                | Code ____   | Code ____           | Code ____ |
| [1] Private transportation (i.e. motorbike, car, bus) |             | [3] Walking          |           | [5] Other, specify _____ |             |                     |           |
| [2] Public transportation (i.e. motorbike, car, bus)  |             | [4] Bicycle          |           | [99] Don't know          |             | [98] No response    |           |
| <b>1.2 Temps de trajet</b>                            |             |                      |           |                          |             |                     |           |
| Code ____                                             | Code ____   | Code ____            | Code ____ | Code ____                | Code ____   | Code ____           | Code ____ |
| [1] <30 min                                           |             | [3] ≥1.0 à <2.0 h    |           | [5] ≥3.0 à <4.0 h        |             | [99] Ne sait pas    |           |
| [2] ≥30 à <60 min                                     |             | [4] ≥2.0 à <3.0 h    |           | [6] ≥4.0h                |             | [98] Pas de réponse |           |
| <b>1.3 Coût du transport</b>                          |             |                      |           |                          |             |                     |           |
| Code ____                                             | Code ____   | Code ____            | Code ____ | Code ____                | Code ____   | Code ____           | Code ____ |
| [1] <1.0 USD                                          |             | [3] ≥3.0 à <5.0 USD  |           | [5] ≥10.0 USD            |             | [99] Ne sait pas    |           |
| [2] ≥1.0 à <3.0 USD                                   |             | [4] ≥5.0 à <10.0 USD |           | [98] Pas de réponse      |             |                     |           |
| <b>1.4 Distance du trajet</b>                         |             |                      |           |                          |             |                     |           |
| Code ____                                             | Code ____   | Code ____            | Code ____ | Code ____                | Code ____   | Code ____           | Code ____ |
| [1] <500 m                                            |             | [3] ≥1.0 à <2.0 km   |           | [5] ≥3.0 à <4.0 km       |             | [99] Ne sait pas    |           |
| [2] ≥500 m à <1.0 km                                  |             | [4] ≥2.0 à <3.0 km   |           | [6] ≥4.0 km              |             | [98] Pas de réponse |           |

#### **ASSURANCE**

- 2 Pour quels membres de ce ménage l'assurance couvre-t-elle les dépenses de santé ?**

*Instructions* : Indiquer un code par catégorie. Passer cette question s'il n'y a aucun membre d'âge <2 ans/≥2 à <5 ans/≥5 à <15 ans/≥15 ans dans ce ménage (voir questions 2 et 3 de ce formulaire partie A).

| <2 ans     | ≥2 à <5 ans | ≥5 à <15 ans     | ≥15 ans             |
|------------|-------------|------------------|---------------------|
| Code _____ | Code _____  | Code _____       | Code _____          |
| [1] Oui    | [2] Non     | [99] Ne sait pas | [98] Pas de réponse |

- 3 Quels types de dépenses de santé sont habituellement couverts par l'assurance pour les membres de ce ménage ?**

*Instructions* : Indiquer uniquement un code par catégorie et par groupe d'âge. Passer cette question s'il n'y a aucun membre d'âge <2 ans/≥2 à <5 ans/≥5 à <15 ans/≥15 ans dans ce ménage (voir également les questions 2 et 3 de ce formulaire partie

A). Passer cette question s'il n'y a aucune assurance qui couvre les dépenses de santé des membres d'âge <2 ans/≥2 à <5 ans/≥5 à <15 ans/≥15 ans.

|                                                                                           | <2 ans     | ≥2 à <5 ans | ≥5 à <15 ans     | ≥15 ans             |
|-------------------------------------------------------------------------------------------|------------|-------------|------------------|---------------------|
|                                                                                           | [1] Oui    | [2] Non     | [99] Ne sait pas | [98] Pas de réponse |
| <b>1</b> Inscription                                                                      | Code _____ | Code _____  | Code _____       | Code _____          |
| <b>2</b> Consultation/Visite chez le médecin                                              | Code _____ | Code _____  | Code _____       | Code _____          |
| <b>3</b> Examen physique - général                                                        | Code _____ | Code _____  | Code _____       | Code _____          |
| <b>4</b> Examen physique – spécifique, préciser _____                                     | Code _____ | Code _____  | Code _____       | Code _____          |
| <b>5</b> Diagnostics - diagnostics généraux de laboratoire                                | Code _____ | Code _____  | Code _____       | Code _____          |
| <b>6</b> Diagnostics – diagnostics spécifiques de laboratoire, préciser _____             | Code _____ | Code _____  | Code _____       | Code _____          |
| <b>7</b> Diagnostics Imagerie générale                                                    | Code _____ | Code _____  | Code _____       | Code _____          |
| <b>8</b> Diagnostics Imagerie spécifique, préciser _____                                  | Code _____ | Code _____  | Code _____       | Code _____          |
| <b>9</b> Diagnostics Autre, préciser _____                                                | Code _____ | Code _____  | Code _____       | Code _____          |
| <b>10</b> Traitement Médication générale                                                  | Code _____ | Code _____  | Code _____       | Code _____          |
| <b>11</b> Traitement Médication spécifique, préciser _____                                | Code _____ | Code _____  | Code _____       | Code _____          |
| <b>12</b> Traitement Autre médication, préciser _____                                     | Code _____ | Code _____  | Code _____       | Code _____          |
| <b>13</b> Traitement Interventions (autres que chirurgie), préciser _____                 | Code _____ | Code _____  | Code _____       | Code _____          |
| <b>14</b> Traitement Chirurgie                                                            | Code _____ | Code _____  | Code _____       | Code _____          |
| <b>15</b> Hospitalisation <7 jours                                                        | Code _____ | Code _____  | Code _____       | Code _____          |
| <b>16</b> Hospitalisation ≥7 jours                                                        | Code _____ | Code _____  | Code _____       | Code _____          |
| <b>17</b> Services d'urgence                                                              | Code _____ | Code _____  | Code _____       | Code _____          |
| <b>18</b> Soins prénatals                                                                 | Code _____ | Code _____  | Code _____       | Code _____          |
| <b>19</b> Soins postnatals                                                                | Code _____ | Code _____  | Code _____       | Code _____          |
| <b>20</b> Médecine préventive                                                             | Code _____ | Code _____  | Code _____       | Code _____          |
| <b>21</b> Vaccination                                                                     | Code _____ | Code _____  | Code _____       | Code _____          |
| <b>22</b> Soins à domicile (personnes âgées, handicapés, malades chroniques/à long terme) | Code _____ | Code _____  | Code _____       | Code _____          |
| <b>23</b> Thérapie de soutien (physiothérapie, ergothérapie, réhabilitation)              | Code _____ | Code _____  | Code _____       | Code _____          |

**ETHNOGRAPHIE****4 À quelle religion/groupe ethnique/tribu appartiennent les membres de ce ménage ?**

*Instructions :* Donner une réponse par groupe d'âge uniquement. Passer cette question s'il n'y a aucun membre d'âge >2 ans/≥2 à <5 ans/≥5 à <15 ans/≥15 ans dans ce ménage (voir également questions 2 et 3 de ce formulaire Partie A).

|                                | <2 ans                                                                          | ≥2 to <5 ans                                                                    | ≥5 to <15 ans                                                                   | ≥15 ans                                                                         |
|--------------------------------|---------------------------------------------------------------------------------|---------------------------------------------------------------------------------|---------------------------------------------------------------------------------|---------------------------------------------------------------------------------|
| Religion/Groupe ethnique/Tribu | _____                                                                           | _____                                                                           | _____                                                                           | _____                                                                           |
|                                | <input type="radio"/> 99=Ne sait pas<br><input type="radio"/> 98=Pas de réponse | <input type="radio"/> 99=Ne sait pas<br><input type="radio"/> 98=Pas de réponse | <input type="radio"/> 99=Ne sait pas<br><input type="radio"/> 98=Pas de réponse | <input type="radio"/> 99=Ne sait pas<br><input type="radio"/> 98=Pas de réponse |

**5 La religion/le groupe ethnique/la tribu comme indiqué à la question 4 influence-t-elle/il les différents aspects de l'utilisation des soins de santé pour les membres de ce ménage ?**

*Instructions :* Indiquer un code par catégorie et groupe d'âge uniquement. Passer cette question s'il y a un membre d'âge >2 ans/≥2 à <5 ans/≥5 à <15 ans/≥15 ans dans ce ménage (voir également questions 2 et 3 de ce formulaire Partie A).

|                                                                                                          | <2 ans     | ≥2 à <5 ans | ≥5 to <15 ans    | ≥15 ans          |
|----------------------------------------------------------------------------------------------------------|------------|-------------|------------------|------------------|
|                                                                                                          | [1] Oui    | [2] Non     | [99] Ne sait pas | [98] pas réponse |
| <b>1</b> Visite dans un établissement de santé (hôpital, centre de soins, poste de santé)                | Code _____ | Code _____  | Code _____       | Code _____       |
| <b>2</b> Visite chez un médecin                                                                          | Code _____ | Code _____  | Code _____       | Code _____       |
| <b>3</b> Visite dans une pharmacie                                                                       | Code _____ | Code _____  | Code _____       | Code _____       |
| <b>4</b> Visite chez un guérisseur traditionnel                                                          | Code _____ | Code _____  | Code _____       | Code _____       |
| <b>5</b> Décision d'automédication                                                                       | Code _____ | Code _____  | Code _____       | Code _____       |
| <b>6</b> Décision de non traitement                                                                      | Code _____ | Code _____  | Code _____       | Code _____       |
| <b>7</b> Examen physique - général                                                                       | Code _____ | Code _____  | Code _____       | Code _____       |
| <b>8</b> Examen physique – spécifique, préciser _____                                                    | Code _____ | Code _____  | Code _____       | Code _____       |
| <b>9</b> Prélèvements d'échantillons (sang, urine, selles, frottis, écouvillons, liquide cérebro-spinal) | Code _____ | Code _____  | Code _____       | Code _____       |
| <b>10</b> Diagnostics - diagnostics généraux de laboratoire                                              | Code _____ | Code _____  | Code _____       | Code _____       |
| <b>11</b> Diagnostics – diagnostics spécifiques de laboratoire, préciser _____                           | Code _____ | Code _____  | Code _____       | Code _____       |
| <b>12</b> Diagnostics<br>Imagerie générale                                                               | Code _____ | Code _____  | Code _____       | Code _____       |
| <b>13</b> Diagnostics<br>Imagerie spécifique, préciser _____                                             | Code _____ | Code _____  | Code _____       | Code _____       |
| <b>14</b> Diagnostics<br>Autre, préciser _____                                                           | Code _____ | Code _____  | Code _____       | Code _____       |
| <b>15</b> Traitement<br>Médication générale                                                              | Code _____ | Code _____  | Code _____       | Code _____       |
| <b>16</b> Traitement<br>Médication spécifique, préciser _____                                            | Code _____ | Code _____  | Code _____       | Code _____       |
| <b>17</b> Traitement<br>Autre médication, préciser _____                                                 | Code _____ | Code _____  | Code _____       | Code _____       |

|                                                                                           |           |           |           |           |
|-------------------------------------------------------------------------------------------|-----------|-----------|-----------|-----------|
| <b>18</b> Traitement Interventions (autres que chirurgie), préciser _____                 | Code ____ | Code ____ | Code ____ | Code ____ |
| <b>19</b> Traitement Chirurgie                                                            | Code ____ | Code ____ | Code ____ | Code ____ |
| <b>20</b> Hospitalisation <7 jours                                                        | Code ____ | Code ____ | Code ____ | Code ____ |
| <b>21</b> Hospitalisation ≥7 jours                                                        | Code ____ | Code ____ | Code ____ | Code ____ |
| <b>22</b> Services d'urgence                                                              | Code ____ | Code ____ | Code ____ | Code ____ |
| <b>23</b> Soins prénatals                                                                 | Code ____ | Code ____ | Code ____ | Code ____ |
| <b>24</b> Soins postnatals                                                                | Code ____ | Code ____ | Code ____ | Code ____ |
| <b>25</b> Médecine préventive                                                             | Code ____ | Code ____ | Code ____ | Code ____ |
| <b>26</b> Vaccination                                                                     | Code ____ | Code ____ | Code ____ | Code ____ |
| <b>27</b> Soins à domicile (personnes âgées, handicapés, malades chroniques/à long terme) | Code ____ | Code ____ | Code ____ | Code ____ |
| <b>28</b> Thérapie de soutien (physiothérapie, ergothérapie, réhabilitation)              | Code ____ | Code ____ | Code ____ | Code ____ |

### VACCINATION

#### 6 Comment les enfants de ce ménage ont-ils été nourris pendant les 6 premiers mois de leur vie ?

*Instructions :* Passer cette question s'il n'y a pas d'enfants de sexe masculin ou féminin dans ce ménage (voir également questions 2 et 3 de ce formulaire partie A).

- 1=Lait maternisé exclusivement  
 2=Lait maternisé et autres aliments, préciser \_\_\_\_\_  
 3=Allaitement et autres aliments, préciser \_\_\_\_\_  
 4=Lait maternisé et allaitement  
 5=Allaitement exclusivement  
 6=Autre, préciser \_\_\_\_\_  
 99=Ne sait pas  
 98=Pas de réponse

#### 7 Quelle source d'approvisionnement en eau était-elle habituellement utilisée pour préparer le lait maternisé ou le lait maternisé et d'autres aliments comme indiqué à la question 6 pour les enfants de ce ménage ?

*Instructions :* Passer cette question s'il n'y a pas d'enfants dans ce ménage (voir également les questions 2 et 3 de ce formulaire Partie A).

- 1=Eau du robinet (à l'intérieur de l'habitation, privé)  
 2=Eau du robinet (à l'extérieur de l'habitation, arrière- cour/cour, privé)  
 3=Eau du robinet (à l'extérieur de l'habitation, public, partagé)  
 4=Borne-fontaine/Eau courante (à l'intérieur de l'habitation, privé)  
 5=Borne-fontaine/Eau courante (à l'extérieur de l'habitation, arrière- cour/cour, privé)  
 6=Borne-fontaine/Eau courante (à l'extérieur de l'habitation, public, partagé)  
 7=Camion-citerne (public, partagé)  
 8=Eau en bouteille  
 9=Eaux de surface (lac, étang, rivière, ruisseau)  
 10=Eaux de surface (canal, canal d'irrigation)  
 11=Eau de source  
 12=Eau de pluie  
 13=Puits/Puits de forage (ouvert/non couvert/non protégé)  
 14=Puits/Puits de forage (couvert/protégé)  
 15=NO FORMULA/OTHER FEEDS PREPARED  
 16=Autre, préciser \_\_\_\_\_  
 99=Ne sait pas  
 98=Pas de réponse

#### 8 Est-ce que les enfants de ce ménage ont été vaccinés depuis leur naissance, y compris les vaccins de naissance ?



*Instructions* : Indiquer un code par catégorie et par enfant uniquement. Passer cette question s'il n'y a aucun enfant dans ce ménage (voir également les questions 2 et 3 de ce formulaire PartieA). Se référer à la question 9 « Formulaire 3 Partie A – Données démographiques/Informations générales sur le ménage » et indiquer les initiales/identificateur du/des membre(s).

| Enfant 1                                                                                                                                                           | Enfant 2                                     | Enfant 3                              | Enfant 4                      |
|--------------------------------------------------------------------------------------------------------------------------------------------------------------------|----------------------------------------------|---------------------------------------|-------------------------------|
| Initiales/Identifiant : _____                                                                                                                                      | Initiales/Identifiant : _____                | Initiales/Identifiant : _____         | Initiales/Identifiant : _____ |
| [1] OUI, vacciné                                                                                                                                                   | [5] Non, manque de vaccins                   | [9] Non, EDS débordé                  |                               |
| [2] Non, parent/tuteur débordé                                                                                                                                     | [6] Non, enfant trop jeune/vieux             | [10] Non, enfant malade               |                               |
| [3] Non, parent/tuteur a décidé que pas nécessaire                                                                                                                 | [7] Non, parent/tuteur a refusé/trop inquiet | [11] Non, pas de carte de vaccination |                               |
| [4] Non, ne sait pas où aller                                                                                                                                      | [8] Non, Autre, préciser _____               | [99] Don't know                       | [98] No response              |
| <b>8.1 Diphtérie et tétanos et coqueluche et <i>Haemophilus influenza</i> et vaccin contre l'hépatite B / DTwPHibHepB</b> (par exemple 6/8, 10/12, 14/16 semaines) |                                              |                                       |                               |
| Code _____                                                                                                                                                         | Code _____                                   | Code _____                            | Code _____                    |
| <b>8.2 Anatoxine tétanique (TT)</b> (par exemple, 1er contact, grossesse, 1, 6, 12/24 mois)                                                                        |                                              |                                       |                               |
| Code _____                                                                                                                                                         | Code _____                                   | Code _____                            | Code _____                    |
| <b>8.3 Anatoxine tétanique et diphtérique (TD)</b> (par exemple, grossesse avec un premier contact, 1, 6, 12 mois)                                                 |                                              |                                       |                               |
| Code _____                                                                                                                                                         | Code _____                                   | Code _____                            | Code _____                    |
| <b>8.4 Tuberculose / BCG</b> (à la naissance)                                                                                                                      |                                              |                                       |                               |
| Code _____                                                                                                                                                         | Code _____                                   | Code _____                            | Code _____                    |
| <b>8.5 Rotavirus / RV</b> (par exemple 6/8, 10/12, 16 semaines)                                                                                                    |                                              |                                       |                               |
| Code _____                                                                                                                                                         | Code _____                                   | Code _____                            | Code _____                    |
| <b>8.6 Rougeole / rougeole et rubéole (MR)</b> (par exemple 9, 15/18 mois)                                                                                         |                                              |                                       |                               |
| Code _____                                                                                                                                                         | Code _____                                   | Code _____                            | Code _____                    |
| <b>8.7 Polio / VPO</b> (par exemple naissance, 6/8, 10/12, 14/16 semaines)                                                                                         |                                              |                                       |                               |
| Code _____                                                                                                                                                         | Code _____                                   | Code _____                            | Code _____                    |
| <b>8.8 Pneumocoque / PCV</b> (par exemple 6/8, 10/12, 14/16 semaines)                                                                                              |                                              |                                       |                               |
| Code _____                                                                                                                                                         | Code _____                                   | Code _____                            | Code _____                    |
| <b>8.9 Fièvre jaune (YF)</b> (par exemple 9 mois)                                                                                                                  |                                              |                                       |                               |
| Code _____                                                                                                                                                         | Code _____                                   | Code _____                            | Code _____                    |
| <b>8.10 Autres vaccins</b>                                                                                                                                         |                                              |                                       |                               |
| Préciser, _____                                                                                                                                                    | Préciser, _____                              | Préciser, _____                       | Préciser, _____               |
| Préciser, _____                                                                                                                                                    | Préciser, _____                              | Préciser, _____                       | Préciser, _____               |
| Préciser, _____                                                                                                                                                    | Préciser, _____                              | Préciser, _____                       | Préciser, _____               |
| Préciser, _____                                                                                                                                                    | Préciser, _____                              | Préciser, _____                       | Préciser, _____               |

**PERCEPTION DE LA MALADIE**

**9 Connaissance, perception, causes et prévention des maladies infectieuses communes**

| Maladie                   | <b>9.1 Maladie connue des membres du ménage ?</b><br>[1] Oui<br>[2] Non<br>[99] Ne sait pas<br>[98] Pas de réponse | <b>9.2 Perception de la maladie par les membres du ménage</b><br><i>Instruction</i> : Décrire brièvement si elle est connue. | <b>9.3 Causes de la maladie connue des membres du ménage ?</b><br><i>Instructions</i> : Indiquer tous les codes (liste A) qui s'appliquent; plus d'une réponse est possible | <b>9.4 Mesures pour prévenir la maladie connues des membres du ménage ?</b><br><i>Instructions</i> : Indiquer tous les codes (liste B) qui s'appliquent ; plus d'une réponse est possible. | <b>9.5 Mesures pour prévenir la maladie utilisées par les membres du foyer ?</b><br><i>Instructions</i> : Indiquer tous les codes (liste B) qui s'appliquent ; il peut y avoir plus d'une réponse. |
|---------------------------|--------------------------------------------------------------------------------------------------------------------|------------------------------------------------------------------------------------------------------------------------------|-----------------------------------------------------------------------------------------------------------------------------------------------------------------------------|--------------------------------------------------------------------------------------------------------------------------------------------------------------------------------------------|----------------------------------------------------------------------------------------------------------------------------------------------------------------------------------------------------|
| <b>A.</b> Fièvre typhoïde | Code _____                                                                                                         |                                                                                                                              | Code _____                                                                                                                                                                  | Code _____                                                                                                                                                                                 | Code _____                                                                                                                                                                                         |
| <b>B.</b> Choléra         | Code _____                                                                                                         |                                                                                                                              | Code _____                                                                                                                                                                  | Code _____                                                                                                                                                                                 | Code _____                                                                                                                                                                                         |
| <b>C.</b> Paludisme       | Code _____                                                                                                         |                                                                                                                              | Code _____                                                                                                                                                                  | Code _____                                                                                                                                                                                 | Code _____                                                                                                                                                                                         |
| <b>D.</b> Grippe          | Code _____                                                                                                         |                                                                                                                              | Code _____                                                                                                                                                                  | Code _____                                                                                                                                                                                 | Code _____                                                                                                                                                                                         |
| <b>E.</b> Méningite       | Code _____                                                                                                         |                                                                                                                              | Code _____                                                                                                                                                                  | Code _____                                                                                                                                                                                 | Code _____                                                                                                                                                                                         |
| <b>F.</b> Hépatite E      | Code _____                                                                                                         |                                                                                                                              | Code _____                                                                                                                                                                  | Code _____                                                                                                                                                                                 | Code _____                                                                                                                                                                                         |
| <b>G.</b> Tuberculose     | Code _____                                                                                                         |                                                                                                                              | Code _____                                                                                                                                                                  | Code _____                                                                                                                                                                                 | Code _____                                                                                                                                                                                         |
| <b>H.</b> VIH/SIDA        | Code _____                                                                                                         |                                                                                                                              | Code _____                                                                                                                                                                  | Code _____                                                                                                                                                                                 | Code _____                                                                                                                                                                                         |

|                                                    |                                                                      |
|----------------------------------------------------|----------------------------------------------------------------------|
| Liste A: Causes possibles                          | Liste B: Mesures préventives possibles                               |
| [1] Consommation d'alcool<br>[2] Temps/sorcellerie | [1] Pas de consommation d'alcool<br>[2] Dormir sous une moustiquaire |

|                                                                                                                                                   |                                                                                                                                                               |
|---------------------------------------------------------------------------------------------------------------------------------------------------|---------------------------------------------------------------------------------------------------------------------------------------------------------------|
| [3] Piqûre de moustique/d'insecte                                                                                                                 | [3] Utiliser des sprays insecticides/anti-moustiques                                                                                                          |
| [4] Morsure de chien                                                                                                                              | [4] Maintenir la maison et ses environs immédiats propres                                                                                                     |
| [5] Boire de l'eau non traitée de surface/de source (lac, étang, rivière, ruisseau, canal, canal d'irrigation)                                    | [5] Avoir une pratique correcte de l'élimination des déchets humains et domestiques                                                                           |
| [6] Contact physique étroit/baiser/embrassade                                                                                                     | [6] Éviter le contact rapproché avec des chiens                                                                                                               |
| [7] Manger des produits alimentaires crus comme des légumes/de la salade, des fruits, des produits laitiers, des œufs, de la viande ou du poisson | [7] Traiter l'eau (faire bouillir, filtration, désinfection solaire, sédimentation, chloration)                                                               |
| [8] Ne pas se laver les mains correctement en préparant la nourriture/les repas                                                                   | [8] Ne pas cuisiner/préparer la nourriture/les repas avec de l'eau non traitée                                                                                |
| [9] Ne pas se laver les mains correctement avant/après être allé aux toilettes                                                                    | [9] Ne pas laver les produits alimentaires à consommer crus avec de l'eau non traitée                                                                         |
| [10] Contact avec du sang humain (injection, transfusion, chirurgie)                                                                              | [10] Faire bouillir/chauffer à nouveau les restes/les aliments/repas préparés avant de les consommer                                                          |
| [11] Consommation de sang animal cru                                                                                                              | [11] Ne pas manger des produits alimentaires crus comme légumes/salade, fruits, produits laitiers, œufs, viande ou poisson                                    |
| [12] Autre, préciser _____                                                                                                                        | [12] Couvrir les produits alimentaires/repas                                                                                                                  |
| [99] Ne sait pas                                                                                                                                  | [13] Protéger les produits alimentaires/repas contre les mouches                                                                                              |
| [98] Pas de réponse                                                                                                                               | [14] Éviter la nourriture/les boissons des vendeurs de rue                                                                                                    |
|                                                                                                                                                   | [15] Éviter le contact rapproché avec les personnes malades                                                                                                   |
|                                                                                                                                                   | [16] Pas de contact physique étroit/baisers/embrassades                                                                                                       |
|                                                                                                                                                   | [17] Se couvrir le nez/la bouche en éternuant/toussant                                                                                                        |
|                                                                                                                                                   | [18] Pas de contact/consommation de sang humain/animal                                                                                                        |
|                                                                                                                                                   | [19] Avoir une bonne hygiène des mains en préparant la nourriture/les repas (se laver les mains avec du savon et de l'eau, se laver les mains par frottement) |
|                                                                                                                                                   | [20] Avoir une bonne hygiène des mains avant/après être allé aux toilettes (se laver les mains avec du savon et de l'eau, se laver les mains par frottement)  |
|                                                                                                                                                   | [21] Autre, préciser _____                                                                                                                                    |
|                                                                                                                                                   | [99] Ne sait pas                                                                                                                                              |
|                                                                                                                                                   | [98] Pas de réponse                                                                                                                                           |

**10 Pour quels membres de ce ménage les mesures préventives listées à la questions 9.5 contre la fièvre typhoïde sont-elles utilisées ?**

*Instructions* : Cocher plusieurs cases si nécessaire ; il peut y avoir plus d'une réponse.

- 1=<2 ans                       3= $\geq$ 5 à <15 ans                       5=PAS UTILISÉ                       99=Ne sait pas  
 2= $\geq$ 2 à < 5 ans                       4= $\geq$ 15 ans                       98=Pas de réponse

**11 Nommer les membres du ménage pour lesquels une fièvre typhoïde a été diagnostiquée dans les 3 derniers mois. Quels éléments de diagnostic ont été utilisés pour confirmer la fièvre typhoïde?**

*Instructions* : Indiquer plusieurs codes si nécessaire pour chaque membre du ménage ; il peut y avoir plus d'une réponse.

| Membre 1<br>Initiales/Identifiant: __ | Membre 2<br>Initiales/Identifiant: __ | Membre 3<br>Initiales/Identifiant: __                         | Membre 4<br>Initiales/Identifiant: __ |
|---------------------------------------|---------------------------------------|---------------------------------------------------------------|---------------------------------------|
| [1] Hémostoculture                    | [3] Test sanguin/de Widal             | [5] Pas applicable (pas diagnostiqué avec la fièvre typhoïde) |                                       |
| [2] Coproculture                      | [4] Autre test, préciser _____        | [99] Ne sait pas                                              | [98] Pas de réponse                   |
| Code _____                            | Code _____                            | Code _____                                                    | Code _____                            |

**12 (Où les membres de ce ménage indiqués à la question 11 ont-ils été diagnostiqués pour la fièvre typhoïde?) Où les membres de ce ménage ont-ils recherché des soins de santé?**

*Instructions* : Indiquer un code par membre du ménage uniquement.

| Membre 1<br>Initiales/Identifiant: __      | Membre 2<br>Initiales/Identifiant: __     | Membre 3<br>Initiales/Identifiant: __ | Membre 4<br>Initiales/Identifiant: __ |
|--------------------------------------------|-------------------------------------------|---------------------------------------|---------------------------------------|
| [1] Établissement de santé, préciser _____ | [6] Nulle part, pas de recherche de soins |                                       |                                       |
| [2] Médecin                                | [7] Autre, préciser _____                 |                                       |                                       |
| [3] Nulle part, automédication             | [8] Pas applicable                        |                                       |                                       |
| [4] Guérisseur traditionnel                | [99] Ne sait pas                          |                                       |                                       |
| [5] Pharmacien                             | [98] Pas de réponse                       |                                       |                                       |
| Code _____                                 | Code _____                                | Code _____                            | Code _____                            |

**13 (Les membres de ce ménage pour lesquels une fièvre typhoïde a été diagnostiquée comme indiqué à la question 11 ont-ils reçu un traitement?) Quel traitement ont-ils reçu?**

*Instructions* : Cocher une réponse par membre du ménage uniquement.

| Membre 1<br>Initiales/Identifiant: __              | Membre 2<br>Initiales/Identifiant: __              | Membre 3<br>Initiales/Identifiant: __              | Membre 4<br>Initiales/Identifiant: __              |
|----------------------------------------------------|----------------------------------------------------|----------------------------------------------------|----------------------------------------------------|
| <input type="radio"/> 1=Traitement, préciser _____ | <input type="radio"/> 1=Traitement, préciser _____ | <input type="radio"/> 1=Traitement, préciser _____ | <input type="radio"/> 1=Traitement, préciser _____ |
| <input type="radio"/> 2=Pas applicable             | <input type="radio"/> 2=Pas applicable             | <input type="radio"/> 2=Pas applicable             | <input type="radio"/> 2=Pas applicable             |
| <input type="radio"/> 99=Ne sait pas               | <input type="radio"/> 99=Ne sait pas               | <input type="radio"/> 99=Ne sait pas               | <input type="radio"/> 99=Ne sait pas               |
| <input type="radio"/> 98=Pas de réponse            | <input type="radio"/> 98=Pas de réponse            | <input type="radio"/> 98=Pas de réponse            | <input type="radio"/> 98=Pas de réponse            |

Site \_\_\_\_ Sous-zone \_\_\_\_ Numéro d'habitation \_\_\_\_ Identifiant de l'enquêteur \_\_\_\_

**FORMULAIRE 5: ÉVALUATION DE L'UTILISATION RÉELLE DES SOINS DE SANTÉ GLOBAUX, STRATIFIÉE SELON L'ÂGE ET LE SEXE**

**Partie A: Évaluation de l'utilisation *réelle* des soins de santé**  
**COMPORTEMENT DE RECHERCHE DE SOINS**

**1 Consigner ci-dessous l'apparition de signe(s) ou symptôme(s) (voir liste 1) et préciser où (voir liste 2) et comment le(s) membre(s) a/ont recherché les soins de santé durant les 3 derniers mois ?**

*Instructions* : voir « formulaire 3- partie A-INFORMATIONS GENERALES SUR LE MENAGE » pour obtenir les initiaux/identifiants de chacun des membres du ménage. Indiquer seulement un signe/symptôme par ligne. Commencer avec une nouvelle ligne pour tous nouveaux soins de santé sélectionnés pour chaque signe/symptôme récurrent. Indiquer le nombre des apparitions de chaque signe/symptômes durant les 3 derniers mois. Si une différente option de soins de santé a été sélectionnée pour un signe/symptôme récurrent, indiquer cela dans une nouvelle ligne. Compléter s'il vous plaît, un formulaire supplémentaire s'il y a eu plus de 20 signes/symptômes apparus durant les 3 derniers mois.

| Liste 1:<br>Signe/Symptôme                                                                                                                                                                                                                                                                                                                                                                  |                                                                                                                                                                                                                                                                                                                                                                                                                                                                   | Liste 2:<br>Option de soins de santé                                                                                                                                               |
|---------------------------------------------------------------------------------------------------------------------------------------------------------------------------------------------------------------------------------------------------------------------------------------------------------------------------------------------------------------------------------------------|-------------------------------------------------------------------------------------------------------------------------------------------------------------------------------------------------------------------------------------------------------------------------------------------------------------------------------------------------------------------------------------------------------------------------------------------------------------------|------------------------------------------------------------------------------------------------------------------------------------------------------------------------------------|
| [A] Fièvre<br>[B] Fièvre <3 jours (continus)<br>[C] Fièvre ≥3 jours (continus)<br>[D] Frissons/Tremblements<br>[E] Convulsion<br>[F] Perte de poids<br>[G] Déshydratation<br>[H] Malaise/Faibles/Fatigue<br>[I] Douleurs (muscles/articulations/os)<br>[J] Maux de tête<br>[K] Vertiges/Confusion/ Perte de connaissance<br>[L] Troubles de la pression sanguine<br>[M] Troubles cardiaques | [N] Nausée/Vomissements<br>[O] Diarrhée (liquide/sanglante/mucopurulente)<br>[P] Douleur abdominale/Douleur intestinale<br>[Q] Perte de sang/Hémorragie (interne)<br>[R] Perte de sang/Hémorragie (externe)<br>[S] Éternuements Nez qui coule<br>[T] Toux<br>[U] Respiration rapide/Essoufflement<br>[V] Difficultés respiratoires graves<br>[W] Inflammation de la peau (éruptions cutanées/ rougeurs/pus/démangeaisons)<br>[X] Gonflement/Œdème<br>[Y] Jaunisse | [1] EDS-SETA,<br>Code _____<br>[2] Autre EDS<br>Code _____<br>[3] Médecin<br>[4] Pharmacie<br>[5] Guérisseur traditionnel<br>[6] Nulle part Auto-médication<br>[7] Nulle part Rien |

| No. | Membre du ménage<br>Enregistrer les initiaux/identifiants du membre du ménage ; voir formulaire 3 – partie A- INFORMATIONS GENERALES SUR LE MENAGE » | Signes/<br>Symptômes<br>Utiliser la Liste 1 pour sélectionner le code | Options de soins de santé                     |          | Fréquence<br>Indiquer le nombre d'incidences pour le signe/symptôme listé |
|-----|------------------------------------------------------------------------------------------------------------------------------------------------------|-----------------------------------------------------------------------|-----------------------------------------------|----------|---------------------------------------------------------------------------|
|     |                                                                                                                                                      |                                                                       | Utiliser la Liste 2 pour sélectionner le code | EDS Code |                                                                           |
| 1   |                                                                                                                                                      |                                                                       |                                               |          |                                                                           |
| 2   |                                                                                                                                                      |                                                                       |                                               |          |                                                                           |
| 3   |                                                                                                                                                      |                                                                       |                                               |          |                                                                           |
| 4   |                                                                                                                                                      |                                                                       |                                               |          |                                                                           |
| 5   |                                                                                                                                                      |                                                                       |                                               |          |                                                                           |

1  
2  
3  
4  
5  
6  
7  
8  
9  
10  
11  
12  
13  
14  
15  
16  
17  
18  
19  
20  
21  
22  
23  
24  
25  
26  
27  
28  
29  
30  
31  
32  
33  
34  
35  
36  
37  
38  
39  
40  
41  
42  
43  
44  
45  
46  
47  
48  
49  
50  
51  
52  
53  
54  
55  
56  
57  
58  
59  
60

|    |  |  |  |  |
|----|--|--|--|--|
| 6  |  |  |  |  |
| 7  |  |  |  |  |
| 8  |  |  |  |  |
| 9  |  |  |  |  |
| 10 |  |  |  |  |
| 11 |  |  |  |  |
| 12 |  |  |  |  |
| 13 |  |  |  |  |
| 14 |  |  |  |  |
| 15 |  |  |  |  |
| 16 |  |  |  |  |
| 17 |  |  |  |  |
| 18 |  |  |  |  |
| 19 |  |  |  |  |
| 20 |  |  |  |  |

For peer review only

Appendix 4/Supplementary file 4: Geospatial random selection with application of simple, weighted-stratified sampling (examples of Ghana and Madagascar)

Figure 1 Geographic random points generated by ArcGIS for Asante Akim North and Central, Ghana

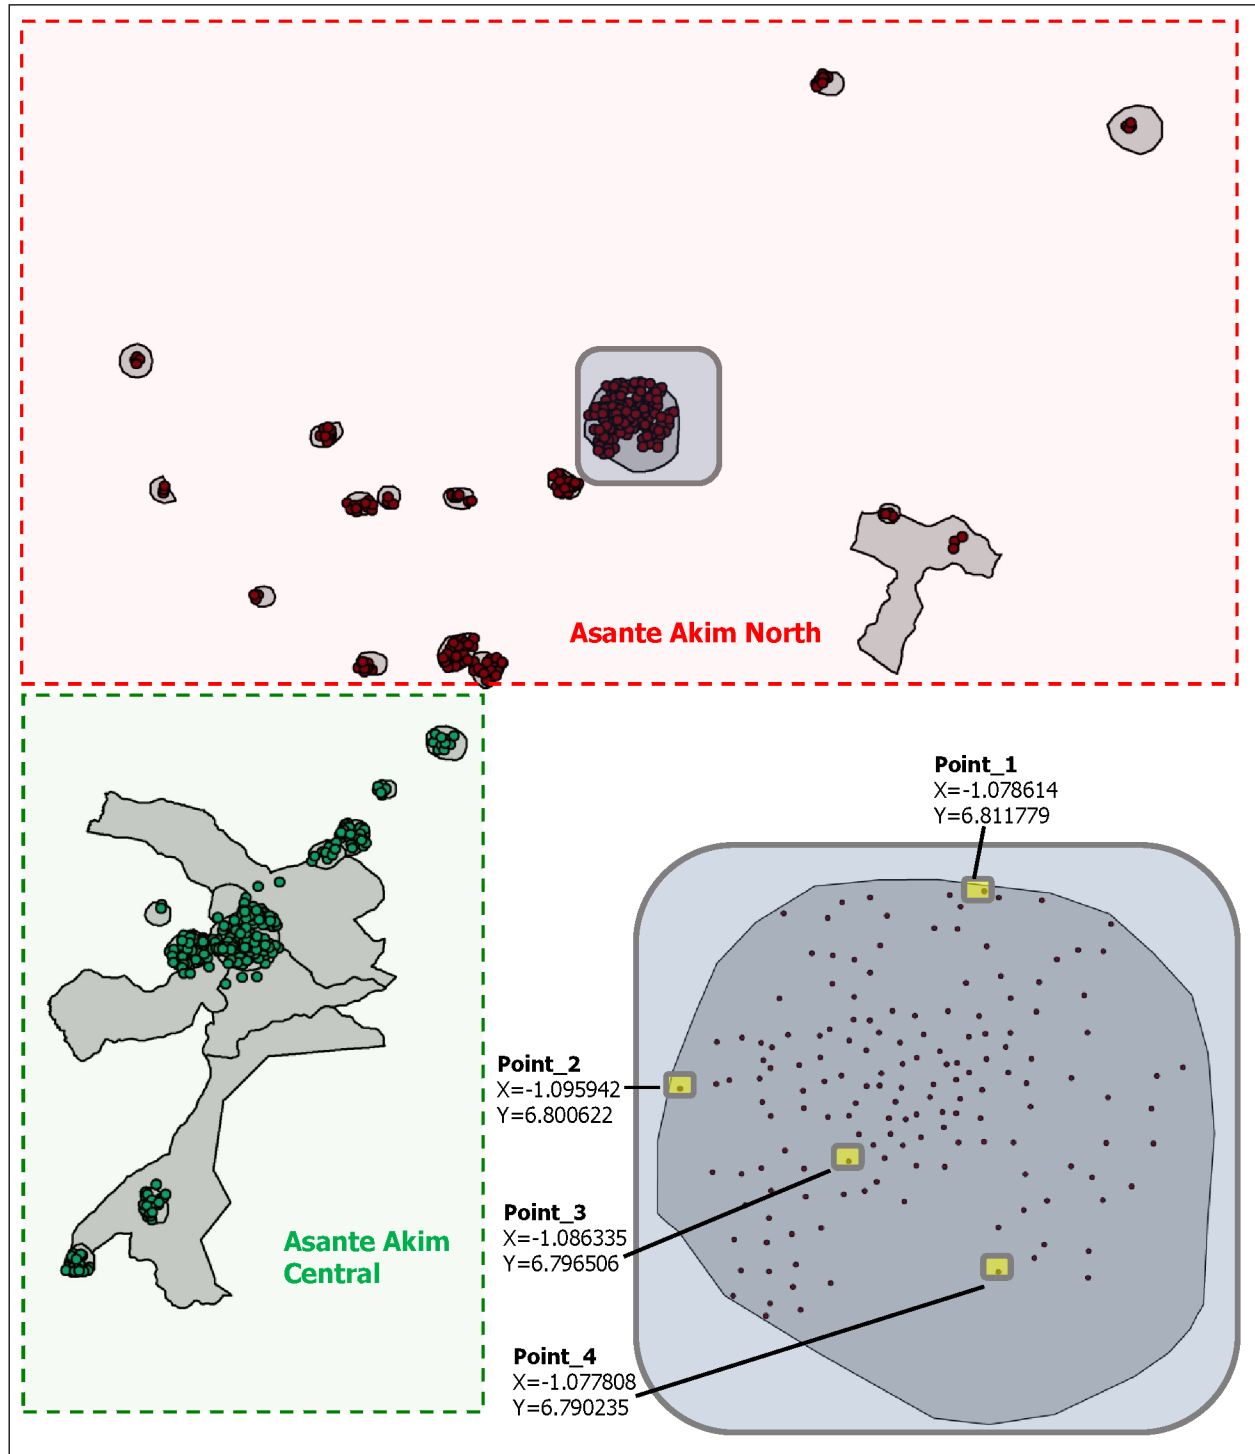

The study area of Asante Akim North (light red rectangle) and Asante Akim Central (light green rectangle) is highlighted in grey. The geographic random points are shown as red and green points for Asante Akim North and Asante Akim Central, respectively. The illustration at the bottom, right highlighted in light blue shows the enlarged area that is indicated as a small central light blue highlighted rectangle. The X- and Y-data of four geographic random points are given as examples; points are indicated as yellow highlighted rectangles. [ArcGIS-generated geographic random points converted and visualized in Google Earth Pro® for Asante Akim North and Central, Ghana, can be shared on request.](#)

**Figure 2 Geographic random points generated by ArcGIS for Renivohitra/Antananarivo, Madagascar**

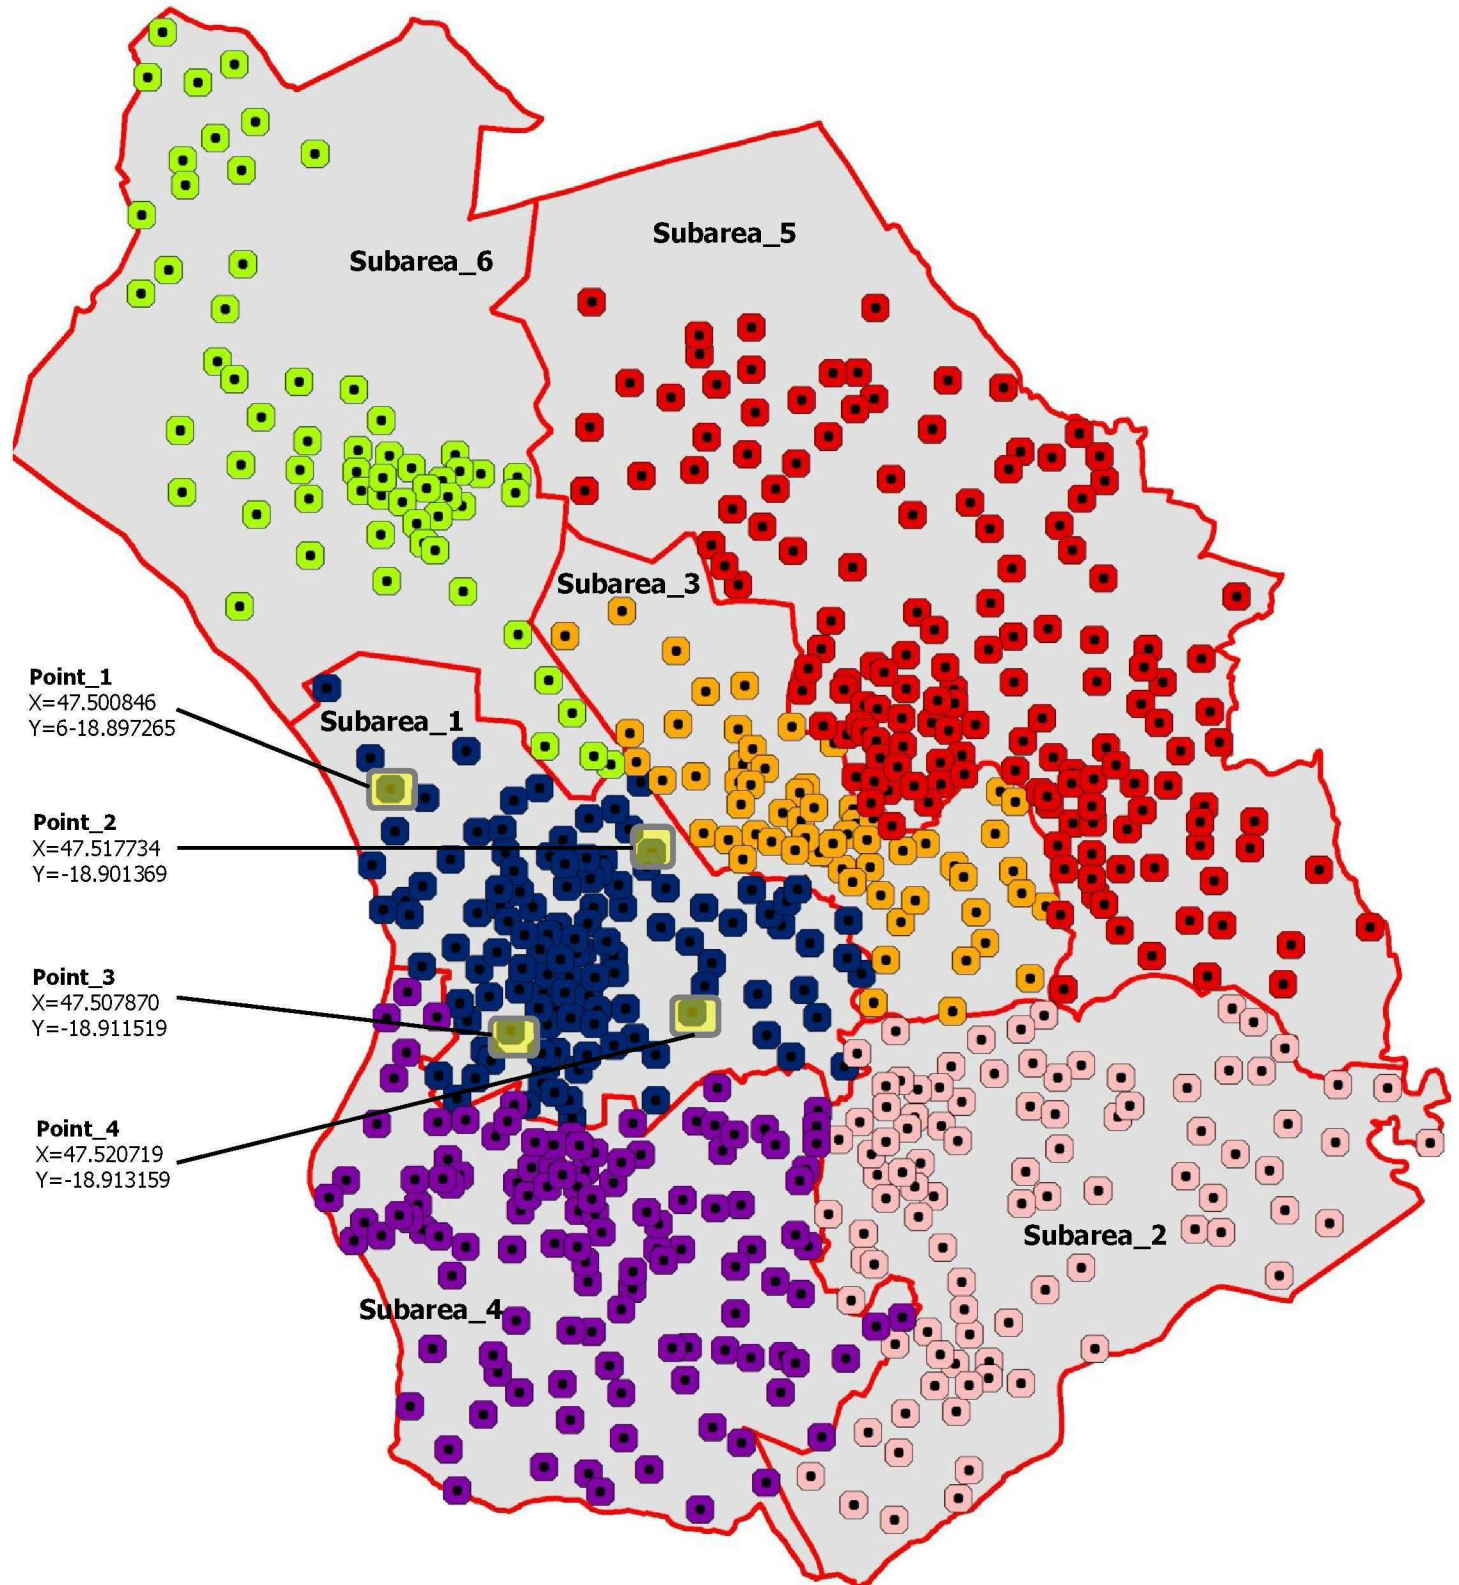

The study area of Renivohitra/Antananarivo, which is subdivided into six administrative subareas, is highlighted in grey. The geographic random points are shown as blue (subarea\_1), pink (subarea\_2), orange (subarea\_3), purple (subarea\_4), red (subarea\_5) and green (subarea\_6) points. The X- and Y-data of four geographic random points are given as examples; points are indicated as yellow highlighted rectangles. [ArcGIS-generated geographic random points converted and visualized in Google Earth Pro® for Renivohitra/Antananarivo, Madagascar, can be shared on request.](#)



**Figure 3 ArcGIS-generated geographic random points converted and visualized in Google Earth Pro® for Asante Akim North and Central, Ghana (online, supplementary material)**

**Figure 3A**

Random points by smallest administrative subarea visualized in Google Earth Pro® for Asante Akim Central (northern), Ghana

**Figure 3B**

Random points by smallest administrative subarea visualized in Google Earth Pro® for Asante Akim Central (southern), Ghana

**Figure 3C**

Random points by smallest administrative subarea visualized in Google Earth Pro® for Asante Akim North (western), Ghana

**Figure 3D**

Random points by smallest administrative subarea visualized in Google Earth Pro® for Asante Akim North (eastern), Ghana

**Figure 4 ArcGIS-generated geographic random points converted and visualized in Google Earth Pro® for Renivohitra/Antananarivo, Madagascar (online, supplementary material)**

**Figure 4A**

The Latitude and Longitude of four geographic random points shown as examples are given as degrees, decimal minutes; points are indicated as yellow highlighted rectangles:

**Figure 4B**

Random points visualized in Google Earth Pro® for Subarea 1, 3 and 4, Renivohitra/Antananarivo, Madagascar

**Figure 4C**

Random points visualized in Google Earth Pro® for Subarea 2, Renivohitra/Antananarivo, Madagascar

**Figure 4D**

Random points visualized in Google Earth Pro® for Subarea 5, Renivohitra/Antananarivo, Madagascar

**Figure 4E**

Random points visualized in Google Earth Pro® for Subarea 6, Renivohitra/Antananarivo, Madagascar

1  
2  
3  
4  
5  
6  
7  
8  
9  
10  
11  
12  
13  
14  
15  
16  
17  
18  
19  
20  
21  
22  
23  
24  
25  
26  
27  
28  
29  
30  
31  
32  
33  
34  
35  
36  
37  
38  
39  
40  
41  
42  
43  
44  
45  
46  
47

**Appendix 5/Supplementary file 57: System diagram of the data collection and data management platform: the Android application "HPA Collect" and the platform "HPA Web"**

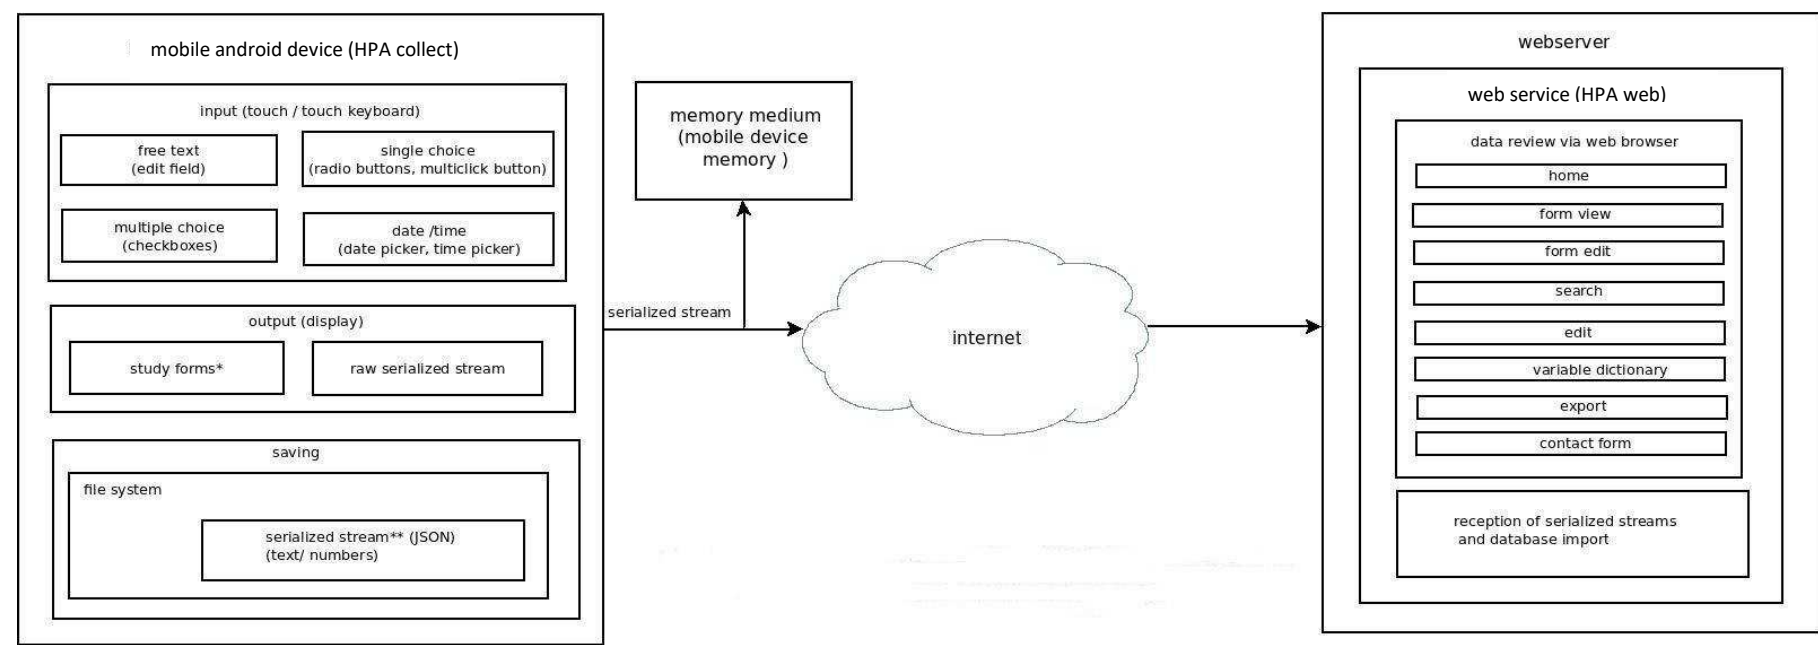

Note. \*study forms: Form 1, Form 3 Part A to C, Form 4 Part A to B, Form 5; \*\*serialized stream: two- or more-dimensional data (e.g. a table) is brought to a one-dimensional form; the application uses the JSON (Java Script Object Notation) format.

# BMJ Open

## The HPAfrica Study Protocol: Assessment of health behavior and population-based socio-economic, hygiene behavioral factors - a standardized repeated cross-sectional study in multiple cohorts in sub-Saharan Africa

|                               |                                                                                                                                                                                                                                                                                                                                                                                                                                                                                                                                                                                                                                                                                                                                                                                                                                                                                                                                                                                                                                                                                                                                                                                                                                                                                                                                                                                                                                                                                                                                                                                                                                                                                                                                                                                                                                                                                                                                                                                                                                                                                                                                                                                     |
|-------------------------------|-------------------------------------------------------------------------------------------------------------------------------------------------------------------------------------------------------------------------------------------------------------------------------------------------------------------------------------------------------------------------------------------------------------------------------------------------------------------------------------------------------------------------------------------------------------------------------------------------------------------------------------------------------------------------------------------------------------------------------------------------------------------------------------------------------------------------------------------------------------------------------------------------------------------------------------------------------------------------------------------------------------------------------------------------------------------------------------------------------------------------------------------------------------------------------------------------------------------------------------------------------------------------------------------------------------------------------------------------------------------------------------------------------------------------------------------------------------------------------------------------------------------------------------------------------------------------------------------------------------------------------------------------------------------------------------------------------------------------------------------------------------------------------------------------------------------------------------------------------------------------------------------------------------------------------------------------------------------------------------------------------------------------------------------------------------------------------------------------------------------------------------------------------------------------------------|
| Journal:                      | <i>BMJ Open</i>                                                                                                                                                                                                                                                                                                                                                                                                                                                                                                                                                                                                                                                                                                                                                                                                                                                                                                                                                                                                                                                                                                                                                                                                                                                                                                                                                                                                                                                                                                                                                                                                                                                                                                                                                                                                                                                                                                                                                                                                                                                                                                                                                                     |
| Manuscript ID                 | bmjopen-2017-021438.R2                                                                                                                                                                                                                                                                                                                                                                                                                                                                                                                                                                                                                                                                                                                                                                                                                                                                                                                                                                                                                                                                                                                                                                                                                                                                                                                                                                                                                                                                                                                                                                                                                                                                                                                                                                                                                                                                                                                                                                                                                                                                                                                                                              |
| Article Type:                 | Protocol                                                                                                                                                                                                                                                                                                                                                                                                                                                                                                                                                                                                                                                                                                                                                                                                                                                                                                                                                                                                                                                                                                                                                                                                                                                                                                                                                                                                                                                                                                                                                                                                                                                                                                                                                                                                                                                                                                                                                                                                                                                                                                                                                                            |
| Date Submitted by the Author: | 27-Jun-2018                                                                                                                                                                                                                                                                                                                                                                                                                                                                                                                                                                                                                                                                                                                                                                                                                                                                                                                                                                                                                                                                                                                                                                                                                                                                                                                                                                                                                                                                                                                                                                                                                                                                                                                                                                                                                                                                                                                                                                                                                                                                                                                                                                         |
| Complete List of Authors:     | <p>Pak, GiDeok; International Vaccine Institute, Biostatistics &amp; Data Management</p> <p>Haselbeck, Andrea; International Vaccine Institute, Epidemiology</p> <p>Seo, Hyeong-Won; International Vaccine Institute, Biostatistics &amp; Data Management</p> <p>Osei, Isaac; Kumasi Centre for Collaborative Research in Tropical Medicine, Kwame Nkrumah University of Science and Technology (KNUST)</p> <p>Amuasi, John; Kumasi Centre for Collaborative Research in Tropical Medicine, Kwame Nkrumah University of Science and Technology (KNUST)</p> <p>Breiman, Robert; Emory University , Global Health Institute</p> <p>Cruz Espinosa, Ligia Maria; International Vaccine Institute, Epidemiology</p> <p>Holm, Marianne; International Vaccine Institute, Epidemiology</p> <p>Im, Justin; International Vaccine Institute, Epidemiology</p> <p>Jang, Geun-Hyeog; International Vaccine Institute, Biostatistics &amp; Data Management</p> <p>Jeon, Hyonjin; International Vaccine Institute, Epidemiology</p> <p>Luby, Stephen; Stanford University Division of Infectious Diseases and Geographic Medicine</p> <p>Lunguya-Metila, Octavie; Institut National de Recherche Biomedicales; Service de Microbiologie, Cliniques Universitaires de Kinshasa</p> <p>MacWright, William; Global Health Institute, Emory University</p> <p>Mogeni, Ondari; International Vaccine Institute, Epidemiology</p> <p>Okeke, Iruka; University of Ibadan</p> <p>Owusu-Dabo, Ellis; Kwame Nkrumah Univeristy of Science and Technology, School of Public Health</p> <p>Park, Jin Kyung; International Vaccine Institute, Biostatistics &amp; Data Management</p> <p>Park, SeEun; International Vaccine Institute, Epidemiology</p> <p>Popoola, Femi; University of Ibadan</p> <p>Seo, Hye-jin; International Vaccine Institute, Epidemiology</p> <p>Soura, Abdramane ; Institut Superieur des Sciences de la Population, University of Ouagadougou</p> <p>Teferi, Mekonnen; Armauer Hansen Research Institute, ALERT Campus</p> <p>Toy, Trevor; International Vaccine Institute, Epidemiology</p> <p>Chon, Yun; International Vaccine Institute, Biostatistics &amp; Data Management</p> |

|                                        |                                                                                                                                                                                                                                                                                                                                                                                                                                          |
|----------------------------------------|------------------------------------------------------------------------------------------------------------------------------------------------------------------------------------------------------------------------------------------------------------------------------------------------------------------------------------------------------------------------------------------------------------------------------------------|
|                                        | Rafindrakalia, Mathilde; Universite d'Antananarivo<br>Rakotozandrindrainy, Raphael; Universite d'Antananarivo<br>Meyer, Christian; Institute of Tropical Medicine, Eberhard Karls<br>University; Faculty of Medicine, Duy Tan University<br>Marks, Florian ; International Vaccine Institute, Epidemiology; The<br>Department of Medicine, The University of Cambridge<br>Panzner, Ursula; International Vaccine Institute, Epidemiology |
| <b>Primary Subject<br/>Heading</b> :   | Epidemiology                                                                                                                                                                                                                                                                                                                                                                                                                             |
| <b>Secondary Subject<br/>Heading</b> : | Epidemiology, Global health, Health services research, Infectious<br>diseases, Public health                                                                                                                                                                                                                                                                                                                                             |
| <b>Keywords</b> :                      | health/hygiene behavior, sanitation, socio-economic, sub-Saharan Africa,<br>HPAfrica study, population sampling frame/spatial sampling                                                                                                                                                                                                                                                                                                   |
|                                        |                                                                                                                                                                                                                                                                                                                                                                                                                                          |

SCHOLARONE™  
Manuscripts

1  
2  
3  
4  
5  
6  
7  
8  
9  
10  
11  
12  
13  
14  
15  
16  
17  
18  
19  
20  
21  
22  
23  
24  
25  
26  
27  
28  
29  
30  
31  
32  
33  
34  
35  
36  
37  
38  
39  
40  
41  
42  
43  
44  
45  
46  
47  
48  
49  
50  
51  
52  
53  
54  
55  
56  
57  
58  
59  
60

## The HPAfrica Study Protocol: Assessment of health behavior and population-based socio-economic, hygiene behavioral factors - a standardized repeated cross-sectional study in multiple cohorts in sub-Saharan Africa

### Short Title

The Health Population Africa (HPAfrica) study

### Authors

Gi-Deok Pak<sup>1#</sup>, Andrea Haselbeck<sup>1#</sup>, Hyeong-Won Seo<sup>1</sup>, Isaac Osei<sup>2</sup>, John Amuasi<sup>2</sup>, Robert F. Breiman<sup>3</sup>, Ligia Maria Cruz Espinoza<sup>1</sup>, Marianne Holm<sup>1</sup>, Justin Im<sup>1</sup>, Geun-Hyeog Jang<sup>1</sup>, Hyon-Jin Jeon<sup>1</sup>, Stephen Luby<sup>4</sup>, Octavie Lunguya-Metila<sup>5,6</sup>, William MacWright<sup>3</sup>, Ondari D. Mogeni<sup>1</sup>, Iruka N. Okeke<sup>7</sup>, Ellis Owusu-Dabo<sup>8</sup>, Jin-Kyung Park<sup>1</sup>, Se Eun Park<sup>1</sup>, Oluwafemi Popoola<sup>7</sup>, Hye-Jin Seo<sup>1</sup>, Abdramane Bassiahi Soura<sup>9</sup>, Mekonnen Teferi<sup>10</sup>, Trevor Toy<sup>1</sup>, Yun Chon<sup>1</sup>, Mathilde Rafindrakalia<sup>11</sup>, Raphael Rakotozandrindrainy<sup>11</sup>, Christian G. Meyer<sup>12,13</sup>, Florian Marks<sup>1,14\*</sup> and Ursula Panzner<sup>1</sup>

### Affiliations

1. International Vaccine Institute, Seoul, Republic of Korea
2. Kumasi Centre for Collaborative Research in Tropical Medicine, Kwame Nkrumah University of Science and Technology (KNUST), Kumasi, Ghana
3. Global Health Institute, Emory University, Atlanta, United States
4. Infectious Diseases and Geographic Medicine, Stanford University, Stanford, United States
5. Institut National de Recherche Biomédicales, Kinshasa, Democratic Republic of the Congo
6. Service de Microbiologie, Cliniques Universitaires de Kinshasa, Kinshasa, Democratic Republic of the Congo
7. University of Ibadan, Ibadan, Nigeria
8. School of Public Health, Kwame Nkrumah University of Science and Technology, Kumasi, Ghana
9. Institut Supérieur des Sciences de la Population, University of Ouagadougou, Ouagadougou, Burkina Faso
10. Armauer Hansen Research Institute, Jimma Road, ALERT Campus, Addis Ababa, Ethiopia
11. University of Antananarivo, Antananarivo, Madagascar
12. Institute of Tropical Medicine, Eberhard Karls University, Tübingen, Germany
13. Faculty of Medicine, Duy Tan University, Da Nang, Vietnam
14. The Department of Medicine, The University of Cambridge, Cambridge, United Kingdom

# Contributed equally

\*Corresponding Author:

Florian Marks, MPH, PhD, International Vaccine Institute, SNU Research Park, 1 Gwanak-ro, Gwanak-gu, Seoul, 08826, Republic of Korea, Phone: +82-2-881-1133, Fax: +82-2-881-1164, E-mail: fmarks@ivi.int

1  
2  
3  
4 41 **Abstract**

5  
6 42 **Introduction**

7  
8 43 The objective of the **Health Population Africa** (HPAfrica) study is to determine health behavior and  
9  
10 44 population-based factors, including socio-economic, ethnographic, hygiene and sanitation factors, at  
11  
12 45 sites of the Severe Typhoid Fever in Africa (SETA) program. SETA aims to investigate healthcare  
13  
14 46 facility-based fever surveillance in Burkina Faso, the Democratic Republic of the Congo, Ethiopia,  
15  
16 47 Ghana, Madagascar, and Nigeria. Meaningful disease burden estimates require adjustment for health  
17  
18 48 behavior patterns, which are assumed to vary among a study population.  
19

20 49  
21  
22 50 **Methods and Analysis**

23  
24 51 For the minimum sample size of household interviews required, the assumptions of an infinite  
25  
26 52 population, a design effect, and age- and sex-stratification are considered. In the absence of a  
27  
28 53 population sampling frame or household list, a spatial approach will be used to generate geographic  
29  
30 54 random points with an Aeronautical Reconnaissance Coverage Geographic Information System  
31  
32 55 (ArcGIS) tool. Printouts of Google Earth Pro<sup>®</sup> satellite imagery visualize these points. Data of interest  
33  
34 56 will be assessed in different seasons by applying population-weighted stratified sampling. An  
35  
36 57 Android-based application and a web service will be developed for electronic data capturing and  
37  
38 58 synchronization with the database server in real time. Sampling weights will be computed to adjust  
39  
40 59 for possible differences in selection probabilities. Descriptive data analyses will be performed in order  
41  
42 60 to assess baseline information of each study population and age- and sex-stratified health behavior.  
43  
44 61 This will allow adjusting disease burden estimates. In addition, multivariate analyses will be applied  
45  
46 62 to look into associations between health behavior, population-based factors, and the disease burden as  
47  
48 63 determined in the SETA study.  
49

50 64  
51  
52  
53  
54  
55  
56  
57  
58  
59  
60

1  
2  
3  
4 65 **Strengths and limitations of this study**

- 5  
6 66 • Standardization in community-based multi-country/-site research requires cautiousness  
7  
8 67 considering variations in setting, language and culture.  
9  
10 68 • Large-scale public health assessments will complement disease burden data by investigating  
11  
12 69 sources of transmission and infection.  
13  
14 70 • Current population data in study sites and their administratively-defined subareas and  
15  
16 71 population sampling frames are assumed to be limited.  
17  
18 72 • Electronic data collection may cause technical problems related to damage, functional failure,  
19  
20 73 or loss of devices.  
21  
22 74 • Unstable wireless internet connection may limit data teams to update the Android-based  
23  
24 75 application, communicate with study managers in real time, and synchronize collected data  
25  
26 76 with the server.  
27  
28 77

29  
30 78 **Registration:** Not required  
31

32 79  
33  
34 80 **Keywords:** health/hygiene behavior, sanitation, socio-economic, population sampling frame/spatial  
35  
36 81 sampling, sub-Saharan Africa, HPAfrica study  
37  
38  
39  
40  
41  
42  
43  
44  
45  
46  
47  
48  
49  
50  
51  
52  
53  
54  
55  
56  
57  
58  
59  
60

## 82 **Introduction**

83 Assessment of health behavior, including healthcare utilization, is an important determinant for the  
84 generation of accurate disease burden estimates among target populations. This is particularly critical  
85 for studies which utilize observational, healthcare facility-based surveillance designs as substantial  
86 variation in health behavior patterns strongly influences disease burden estimates.[1] The adjustment  
87 of disease burden calculations for variation in health behavior will increase the accuracy of measures  
88 of disease occurrence caused by bacterial, fungal, viral, and parasitic pathogens among populations  
89 under investigation. Furthermore, the influence of a large variety of population-based factors on both  
90 health behavior and disease burden has been recognized. This includes socioeconomic factors such as  
91 education, occupation, income, the availability of household assets,[2, 3] ethnical/religious and  
92 cultural factors,[4, 5] but also hygiene and sanitation facilities,[6-10] food handling,[11-14] and  
93 animal contacts.[9]

94  
95 The **Health Population Africa** (HPAfrica) study will be conducted in Burkina Faso, the Democratic  
96 Republic of the Congo (DRC), Ethiopia, Ghana, Madagascar, and Nigeria. Experiences from the  
97 Typhoid Fever Surveillance in Africa Program (TSAP) will be transferred to the Severe Typhoid in  
98 Africa (SETA) program.[15, 16] In this program, standardized, healthcare facility-based fever  
99 surveillance is performed at selected study sites in participating countries over a two-year period.[17]  
100 SETA primarily aims to systematically collect information on the burden of severe *Salmonella*  
101 infections. Subjects living in defined catchment areas with either an acute fever episode, a fever  
102 history of  $\geq 3$  consecutive days, clinically-suspected typhoid fever or clinically-diagnosed  
103 gastrointestinal perforations due to typhoid fever will be eligible. In addition, the severity of  
104 *Salmonella* caused illnesses and the natural history of *Salmonella* infection will be recorded with  
105 further analyses on host immune responses and chronic carriage.

## 107 **Objectives and Outcomes**

108 The goal of the HPAfrica study is to assess the *generic* and *actual* age- and sex-stratified health



1  
2  
3  
4 109 behavior. *Generic* health behavior pertains to behavior in conditions associated with fever and other  
5  
6 110 signs and symptoms unrelated to onsets, whereas *actual* health behavior is related to onsets (Appendix  
7  
8 111 1/Supplementary file 1; Appendix 2/Supplementary file 2: Form 4 Part A, Form 5; Appendix  
9  
10 112 3/Supplementary file 3). These data will be used to adjust age- and sex-stratified measures of disease  
11  
12 113 occurrence like incidences of infectious pathogens in the proportion of a study population not  
13  
14 114 captured by the SETA surveillance program. Data documented for various signs and symptoms or a  
15  
16 115 combination of these will be used for a gradual classification of healthcare utilization based on disease  
17  
18 116 severity.  
19

20 117  
21 118 The HPAfrica study will, moreover, collect data on healthcare-associated factors such as travel  
22  
23 119 modalities, possession of a health insurance, cultural/ethnographic factors, immunization status  
24  
25 120 among children,[18, 19] and the frequency of occurrence and individual perception of selected  
26  
27 121 diseases (Appendix 2/Supplementary file 2: Form 4 Part B; Appendix 3/Supplementary file 3:Form 4  
28  
29 122 Part B). Demographic data (Appendix 2/ Supplementary file 2: Form 3 Part A; Appendix  
30  
31 123 3/Supplementary file 3, Form 3 Part A) will be used for age- and sex-stratification of the population  
32  
33 124 surveyed, which is required to compute adjustment factors for measures of disease occurrence. Socio-  
34  
35 125 economic data (Appendix 2/ Supplementary file 2: Form 3 Part B; Appendix 3/ Supplementary file 3:  
36  
37 126 Form 3 Part B) will be utilized to calculate wealth indices for descriptive and analytical approaches.  
38  
39 127 Information on hygiene and sanitation facilities (Appendix 2/ Supplementary file 2: Form 3 Part C;  
40  
41 128 Appendix 3/Supplementary file 3: Form 3 Part C) may provide a better understanding of the  
42  
43 129 occurrence and frequency of pathogens identified among study populations.  
44

## 45 130 46 47 131 **Methods**

### 48 49 132 **Study sites**

50  
51 133 The boundaries of each site will be defined using pre-existing information set by statistical authorities  
52  
53 134 or ministries of health (Table 1) coupled with open-source high-resolution geospatial data. A  
54  
55 135 retrospective review of records of SETA recruitment healthcare facilities from the past two years will

1  
2  
3  
4 136 support the re-definement of site limits. It is expected that this review will reveal the residences or at  
5  
6 137 least the broader administrative residential areas such as communities, districts or villages of patients  
7  
8 138 who sought healthcare for any reason. Maps and satellite imagery may be used to better visualize  
9  
10 139 patients' residences and the overall boundaries, including the geographically- or administratively-  
11  
12 140 defined subareas, census enumeration areas or strata, of each site. Where boundaries cannot be clearly  
13  
14 141 defined, additional factors such as the distance to a recruitment healthcare facility may be considered.  
15  
16  
17  
18  
19  
20  
21  
22  
23  
24  
25  
26  
27  
28  
29  
30  
31  
32  
33  
34  
35  
36  
37  
38  
39  
40  
41  
42  
43  
44  
45  
46  
47  
48  
49  
50  
51  
52  
53  
54  
55  
56  
57  
58  
59  
60

For peer review only

142 **Table 1: Background data of participating study sites of target countries**

| Country      | Study site                               | Setting*    | Approximate total site population (year) | Approximate age-stratified site population |                  |                  |                  | Approximate sex-stratified site population |                     |
|--------------|------------------------------------------|-------------|------------------------------------------|--------------------------------------------|------------------|------------------|------------------|--------------------------------------------|---------------------|
|              |                                          |             |                                          | <2y                                        | ≥2y to <5y       | ≥5y to <15y      | ≥15y             | Male                                       | Female              |
| Burkina Faso | Nioko II <sup>1</sup>                    | Urban       | 19,251 (2017)                            | 2,394                                      | 1,977            | 4,657            | 10,223           | 9,321                                      | 9,930               |
|              | Polesgo <sup>1</sup>                     | Rural       | 7,897 (2017)                             | 934                                        | 893              | 1,808            | 4,262            | 3,856                                      | 4,041               |
|              | Ouagadougou <sup>1</sup>                 | Urban       | 2,532,311 (2015)                         | 421,429                                    | 693,723          | 1,417,159        | 1,271,302        | 1,261,009                                  |                     |
| DRC          | Kisantu <sup>2</sup>                     | Urban       | 291,252 (2017)                           | 48,043                                     |                  | 243,209          |                  | 91,598 <sup>#</sup>                        | 99,231 <sup>#</sup> |
| Ethiopia     | Wolayita Zone <sup>3</sup>               | Urban/Rural | 1,968,735 (2017)                         | 100,800                                    | 206,520          | 635,015          | 1,026,300        | 964,577                                    | 1,004,058           |
|              | Wolayita Sodo <sup>3</sup>               | Urban/Rural | 120,288 (2017)                           | 6,161                                      | 12,617           | 38,807           | 62,703           | 59,898                                     | 60,390              |
|              | East Shewa & Arsi Zone <sup>3</sup>      | Urban/Rural | 3,249,722 (2017)                         | 104,408                                    | 422,939          | 1,016,917        | 1,705,458        | 1,671,699                                  | 1,578,023           |
|              | Adama Wenji <sup>3</sup>                 | Urban/Rural | 53,540 (2017)                            | 3,330                                      | 7,204            | 17,028           | 25,978           | 27,199                                     | 26,341              |
| Ghana        | Asante Akim North & Central <sup>4</sup> | Urban/Rural | 140,694 (2010)                           | 11,606                                     | 8,363            | 35,618           | 85,107           | 67,673                                     | 73,021              |
|              | Kumasi (Metropolis) <sup>4,5</sup>       | Urban       | 1,730,249 (2010)                         | 52,516                                     | 178,575          | 421,834          | 1,077,324        | 826,479                                    | 903,770             |
| Madagascar   | Antananarivo <sup>6</sup> (Renivohitra)  | Urban       | 1,247,025 (2009)                         | N/A <sup>§</sup>                           | N/A <sup>§</sup> | N/A <sup>§</sup> | N/A <sup>§</sup> | N/A <sup>§</sup>                           | N/A <sup>§</sup>    |
|              | Imerintsiatosika <sup>7</sup>            | Rural       | 44,669 (2016)                            | 3,582                                      | 4,449            | 7,610            | 29,028           | N/A <sup>§</sup>                           | N/A <sup>§</sup>    |
| Nigeria      | Ibadan <sup>8</sup>                      | Urban       | 1,343,147 (2006)                         | 176,110                                    |                  | 305,656          | 861,381          | 661,818                                    | 681,329             |

143 Note. Table 1 shows population data that were available at the time of the HPAfrica protocol writing; population data and boundaries of geographically and/or  
 144 administratively defined study sites may be subject to changes during the course of the study. \*The classification of sites by country is based on best local knowledge; #The  
 145 sex-stratification is based on a total population of 190,829; §Population data not available at the time of protocol writing; y= years of age.

146  
 147 Source of population data: **Burkina Faso** (<sup>1</sup><http://www.insd.bf/n/>); <sup>2</sup><http://www.indepth-network.org/member-centres/ouagadougou-hdss/>); **DRC** (<sup>2</sup>Kisantu Central Health  
 148 Zone Office report, 2016); **Ethiopia** (<sup>3</sup>Health Management Information System of the Ethiopian Ministry of Health (zonal and district health offices); **Ghana** (<sup>4</sup>Ghana  
 149 Statistical Service, 2010 Population & Housing Census, Asante Akim Central Municipality; <sup>5</sup>Ghana Statistical Service, 2010 Population & Housing Census, Summary report of  
 150 final results); **Madagascar** (<sup>6</sup>Population par Fokotany selon la declaration des Chefs Fokotany: Source: Donnee de la cartographie censitaire mises-a-jour en juillet 2009 -  
 151 INSTAT/DDSS; <sup>7</sup>University of Antananarivo); **Nigeria** (<sup>8</sup>Federal Republic of Nigeria 2006 Population and Housing Census (Table DS5), National Population Commission,  
 152 Abuja, Nigeria).

1  
2  
3  
4 153 **Sample size**

5  
6 154 All available sources will be used to gather most up-to-date age- and sex-stratified population data by  
7  
8 155 study site and its administratively- or geographically-defined subareas or strata. This may include  
9  
10 156 latest demographic information from census population totals or a Demographic Surveillance System  
11  
12 157 (DSS)/Health and Demographic Surveillance System (HDSS). Population summary figures and  
13  
14 158 population growth factors, if available, and open-access sampling tools coupled with population data  
15  
16 159 sources like density-based gridded population data may also be used.[20-24]  
17

18 160

19  
20 161 All strata per study site will be included. A household as defined for the HPAfrica study constitutes  
21  
22 162 the primary sampling unit (PSU). The minimum number of randomly selected households to be  
23  
24 163 interviewed will be calculated using the precision-based equation (Equation-I) assuming an infinite  
25  
26 164 population and considering a design effect (DEFF),[25-27] including its accompanying assumptions:  
27

28 165

29  
30 166 **Equation-I: Precision-based sample size calculation by study site for an infinite population [25-31]**  
31 167

$$n_0 = DEFF \cdot \left[ z_{1-\frac{\alpha}{2}}^2 \cdot \frac{4 \cdot p \cdot (1-p)}{d^2} \right]$$

32 168  
33 169

34 Assumptions Equation-I

|                          |                                                                                                                                                                                                                                                                                                |
|--------------------------|------------------------------------------------------------------------------------------------------------------------------------------------------------------------------------------------------------------------------------------------------------------------------------------------|
| $n_0$                    | Minimum total number of households to be interviewed in a study area assuming an infinite population                                                                                                                                                                                           |
| $DEFF$                   | Design effect; set at 1.5<br>$\leq 1.0$ =negative correlation of the outcome(s) of interest between household members; $1.0$ =no correlation of the outcome(s) of interest between household members; $\geq 1.0$ =positive correlation of the outcome(s) of interest between household members |
| $z_{1-\frac{\alpha}{2}}$ | Normal deviation corresponding to a 95% confidence interval (1.96 for alpha of 0.05)                                                                                                                                                                                                           |
| $d$                      | Precision (acceptable error); point estimation; set at 0.2                                                                                                                                                                                                                                     |
| $p$                      | Proportion of the study population expected to visit a recruitment healthcare facility for conditions associated with fever and other signs and symptoms (proportion captured); set at 0.2                                                                                                     |
| $1-p$                    | Proportion of the study population expected to not visit a recruitment healthcare facility for conditions associated with fever and other signs and symptoms (proportion not captured)                                                                                                         |

34  
35  
36  
37  
38  
39  
40  
41  
42  
43  
44  
45  
46 170

47  
48 171 The design effect is defined as an adjustment factor for the natural clustering of health behavior as the  
49  
50 172 main outcome of interest among household members. It accounts for greater statistical variance and,  
51  
52 173 therefore, lower precision compared to simple random sampling.[25, 29, 32, 33] For HPAfrica, the  
53  
54 174 DEFF may be set conservatively at 1.5 based on an estimate of 1.42 resulting from an average  
55  
56 175 household size of seven and an Intracluster Correlation Coefficient (ICC) of 0.07 from the TSAP

176 study.[15, 30, 31, 34] A proportion  $p$  of 0.2 may be assumed if no other estimates are available, or  $p$   
 177 may be based on more precise information available by site or on experiences taken from the TSAP  
 178 study (Table 2): Madagascar, Isotry:  $p = 0.01$ , Burkina Faso, Polesgo:  $p = 0.9$ . [35] Combining all  
 179 assumptions into Equation-I will result in a total minimum number ( $n_0$ ) of 92 household interviews  
 180 per site.

181  
 182 In addition,  $n_0$  will be accounted for the age- and sex-distribution of a study population reflected by  $q$ ,  
 183 the assumed minimum proportion of stratification per age group (<5 years,  $\geq 5$  to <15 years,  $\geq 15$   
 184 years). Factor  $q$  may be arbitrarily set at 0.2 or may be based on previous experiences: Ethiopia,  
 185 Butajira:  $q = 0.09$ , Burkina Faso, Polesgo:  $q = 0.23$ . [15] Applying  $q$  to Equation-II for a binomial  
 186 distribution, including its accompanying assumptions, will result in the age-stratified minimum  
 187 number of household interviews ( $\bar{n}_0$ ) of 461 (Equation-II):

188  
 189 **Equation-II: Precision-based sample size calculation by study site for an infinite population**  
 190 **considering age-stratification and population-weight by subarea or stratum:**  
 191

$$\bar{n}_0 = \left( DEFF \cdot \left[ z_{1-\frac{\alpha}{2}}^2 \cdot \frac{4 \cdot p \cdot (1-p)}{d^2} \right] \right) / q \quad \bar{n}_{0w} = \bar{n}_0 \cdot (n/N)$$

192 Assumptions Equation-II

|                          |                                                                                                                                                                                            |
|--------------------------|--------------------------------------------------------------------------------------------------------------------------------------------------------------------------------------------|
| $\bar{n}_0$              | Minimum total number of households to be interviewed in the study area assuming an infinite population and age-stratification                                                              |
| $\bar{n}_{0w}$           | Minimum number of households to be interviewed by subarea or stratum                                                                                                                       |
| $n/N$                    | Population size of subarea or stratum divided by the population size of the total study area                                                                                               |
| $DEFF$                   | Design effect; set at 1.5                                                                                                                                                                  |
| $z_{1-\frac{\alpha}{2}}$ | Normal deviation corresponding to a 95% confidence interval (1.96 for alpha of 0.05)                                                                                                       |
| $d$                      | Precision (acceptable error); point estimation; set at 0.2                                                                                                                                 |
| $p$                      | Proportion of the study population expected to visit a recruitment healthcare facility for conditions associated with fever and other signs and symptoms (proportion captured); set at 0.2 |
| $1-p$                    | Proportion of the study population expected to not visit a recruitment healthcare facility for conditions associated with fever and other signs and symptoms (proportion not captured)     |
| $q$                      | The minimum proportion of stratification per age group; set at 0.2                                                                                                                         |

193  
 194 Health behavior will be assessed twice at the same households if possible or at alternative households  
 195 in case the study population is instable due to migration and/or high birth/death rates. Additional  
 196 households, assumed to be 20% on average, (Table 2) may be added to account for possible loss to  
 197 follow-up between the two assessments. Eventually, population-weighted stratified sampling with

198 probability proportional to population size (PPPS) to account for unequal selection probability due to  
 199 inhomogeneous population distributions between strata (population-weight ( $n/N$ ) by stratum) will be  
 200 applied to  $\bar{n}_0$  of 553.[36]

201  
 202  
 203

**Table 2: Sample sizes considering infinite population, differing estimates for p, age-stratification and loss to follow-up by study site applying Equation-II:**

| Proportion (p) | Total minimum number of households without DEFF | Total minimum number of households ( $n_0$ ) with DEFF=1.5 | Total minimum number of households ( $\bar{n}_0$ ) with DEFF=1.5 and $q=0.2$ | $\bar{n}_0$ adjusted for loss to follow-up |
|----------------|-------------------------------------------------|------------------------------------------------------------|------------------------------------------------------------------------------|--------------------------------------------|
| 0.1            | 35                                              | 52                                                         | 259                                                                          | 311                                        |
| 0.2            | 62                                              | 92                                                         | 461                                                                          | 553                                        |
| 0.3            | 81                                              | 121                                                        | 605                                                                          | 726                                        |
| 0.4            | 92                                              | 138                                                        | 691                                                                          | 830                                        |
| 0.5            | 96                                              | 144                                                        | 720                                                                          | 864                                        |
| 0.6            | 92                                              | 138                                                        | 691                                                                          | 830                                        |
| 0.7            | 81                                              | 121                                                        | 605                                                                          | 726                                        |
| 0.8            | 62                                              | 92                                                         | 461                                                                          | 553                                        |
| 0.9            | 35                                              | 52                                                         | 259                                                                          | 311                                        |

204  
 205  
 206  
 207  
 208  
 209  
 210  
 211  
 212  
 213

**Abbreviations**

p=Proportion of the study population expected to visit a recruitment healthcare facility for conditions associated with fever and other signs and symptoms (proportion captured); set at 0.2

DEFF=Design effect; set at 1.5

$n_0$ =Total minimum number of households to be interviewed in a study area assuming an infinite population

$\bar{n}_0$ =Total minimum number of households to be interviewed in the study area assuming an infinite population and age-stratification

$q$ =Minimum proportion of stratification per age group; set at 0.2

214

**Sampling with and without population sampling frame**

215

If a comprehensive up-to-date population sampling frame or household list exists through DSS/HDSS

216

or census, computerized selection of households as PSUs will be performed using SAS (Statistical

217

Analysis System, version 9.4, SAS Institute, Cary, NC) applying PPPS population-weighted stratified

218

serial simple random selection without replacement. Selected households labeled with identifiers are

219

visualized using DSS/HDSS or census tools. In case of refusal, absence of a respondent or locating of

220

an abandoned household, interviewers are trained to visit an alternative household closest to the right

221

or left side of an original household. This follows the principle of closest proximity as seen in

222

previous research.[37-40] To limit, furthermore, chances of unequal selection probability, thus

223

chances of selection bias by interviewers, we pre-choose an arbitrary number of five alternative

1  
2  
3  
4 224 households from the population sampling frame that require to be in closest proximity to the original  
5  
6 225 household rather than applying for instance a lottery-based or clockwise spiral outward selection.[36,  
7  
8 226 37, 40] In addition, scoring from one (=closest) to five (=furthest) is applied to alternative households  
9  
10 227 and interviewers are instructed to strictly follow the scoring sequence during the household selection  
11  
12 228 procedure. Compliance of interviewers with the rules given for selecting original and alternative  
13  
14 229 households will be verified on a daily basis. Deviations will be investigated and re-training provided  
15  
16 230 to interviewers as required.  
17  
18 231  
19  
20 232 If no population sampling frame exists we will apply a PPS population-weighted stratified spatial  
21  
22 233 sampling technique.[36] Guided by previous research conducted, random spatial points are generated  
23  
24 234 using the ArcGIS (Aeronautical Reconnaissance Coverage Geographic Information System; Redlands,  
25  
26 235 CA, USA, version 10.2) random point generation tool.[21, 23, 36, 39, 41-46] The tool randomly  
27  
28 236 places a number of points inside the feature of a polygon that corresponds to an administrative  
29  
30 237 subarea or stratum. X- and Y-coordinates define one point until the calculated sample size by stratum  
31  
32 238 is reached. ArcGIS-generated points are converted into an image file of the Keyhole Markup  
33  
34 239 Language (KML) or Keyhole Markup language Zipped (KMZ) format and imported into Google  
35  
36 240 Earth Pro<sup>®</sup>. A unique numerical identifier and geographic coordinates are assigned to each point.  
37  
38 241 Appendix 4/Supplementary file 4 illustrates our approach utilizing examples from Ghana and  
39  
40 242 Madagascar. Spatial points labeled with identifiers are pictured on poster-sized printouts of (60x60 to  
41  
42 243 60x90 cm) of Google Earth Pro<sup>®</sup> satellite imagery with high resolution or alternatively using an open-  
43  
44 244 source application for offline/online automated navigation and mapping to locate points on the ground.  
45  
46 245 Global Positioning System (GPS) receivers (Garmin-eTrex; Garmin Ltd., Lenexa, KS, USA) allow  
47  
48 246 verifying the locations. The receivers will be positioned closely to a located point, in a static position  
49  
50 247 and an open area to assure barrier-free reading. Interviewers assess spatial points for the presence of a  
51  
52 248 household as the PSUs.[24] In case of refusal, absence of a respondent or locating of a non-residential  
53  
54 249 point, interviewers are trained to visit a pre-selected alternative spatial point closest to the right or left  
55  
56 250 side of an original point and assess it for the presence of a household.[37-39, 47] To limit chances of

1  
2  
3  
4 251 unequal selection probability, we pre-select at least five alternative spatial points in closest proximity  
5  
6 252 to the original point that represent a structure of appropriate size and rectangular or square shape from  
7  
8 253 the Google Earth Pro<sup>®</sup> satellite imagery using the in-built distance measurement tool. Same as for  
9  
10 254 sites with a population sampling frame, scoring from one to five is applied to alternative spatial points  
11  
12 255 and interviewers are instructed to follow the scoring sequence. Compliance of interviewers with the  
13  
14 256 rules given for selecting original and alternative households will be verified on a daily basis.  
15  
16 257 Deviations will be investigated and re-training provided to interviewers as required. In the event that a  
17  
18 258 spatial point is placed in equidistance to two (or more) structures, the interviewer skips the original  
19  
20 259 spatial point and chooses a pre-selected alternative spatial point following the scoring sequence. In  
21  
22 260 case two (or more) original spatial points are placed on the same structure, the interviewer assesses  
23  
24 261 the structure for the presence of a household and chooses a second (or more) pre-selected alternative  
25  
26 262 spatial point following the scoring sequence.  
27  
28 263  
29  
30 264 Irrespective of the presence or absence of a population sampling frame, a single-family, single-story  
31  
32 265 household will be approached directly for study participation. However, one household only is  
33  
34 266 enrolled at a multi-family, single-story structure based on following procedures: the interviewer enters  
35  
36 267 the structure and assesses the total number of households; the first household on the right/left side  
37  
38 268 (depending on the inner construction) of the structure is approached; if the first household does not  
39  
40 269 participate, the second household on the right/left side of the same structure is approached. The  
41  
42 270 interviewer continues until one household by structure is enrolled. Similarly, one household only is  
43  
44 271 enrolled at a multi-family, multi-story structure. After assessing the total number of households  
45  
46 272 present, the interviewer approaches the first household nearest to the entrance; if the first household  
47  
48 273 does not participate, the second household closest to the entrance on the same/subsequent floor  
49  
50 274 (depending on the inner construction) is approached; the interviewer continues until one household by  
51  
52 275 structure is enrolled. The interviewer chooses a pre-selected alternative spatial point following the  
53  
54 276 scoring sequence in case no household can be enrolled.  
55  
56 277



278 **Frequency of data collection**

279 Residential points will be visited twice for household interviews during the SETA program to assess  
 280 seasonal influences on health behavior.[48-52] Interviews will take place in differing seasons – one at  
 281 the end of the dry season or at least one month after its beginning and one towards the end of the wet  
 282 season or at least one month after its beginning (Table 3). Currently, the HPAfrica study is ongoing in  
 283 Burkina Faso, Ghana and Madagascar and is anticipated to be continued in the remaining countries  
 284 during the upcoming months.

286 **Table 3: Seasonality in participating countries**

| Country      | Period of Wet Season               | Period of Dry Season         |
|--------------|------------------------------------|------------------------------|
| Burkina Faso | May/June - September/October       | October/November - April/May |
| DRC          | November – March                   | April - October              |
| Ethiopia     | June – August                      | October - May                |
| Ghana        | April – July, September – November | December - March             |
| Madagascar   | November - March/April             | April/May - October          |
| Nigeria      | May – August                       | October - April              |

287 Note. The seasonality by country is based on best local knowledge.

289 **Inclusion and exclusion criteria**

290 Household members of all ages and both sexes living in a study area at the day of the interview will  
 291 be eligible for inclusion. A household will be excluded if the designated respondent declines  
 292 participation or is unavailable after three consecutive visits. All visitors and individuals with unknown  
 293 residence or residence outside the study area will be excluded.

294  
 295 For the purpose of this investigation, a household is defined as a person or a group of related or  
 296 unrelated persons living in the same dwelling unit, acknowledging one adult individual as the  
 297 household head, sharing the same housekeeping arrangements, and independently procuring food and  
 298 other essential for living.[35]

299

300 The interview will exclusively be held with the respondent, who is an adult household member at the  
 301 country-specific legal age of majority. This person may be identified as decision-maker by members

1  
2  
3  
4 302 of the same household and serves as a proxy for an entire household.[15] Further relevant definitions  
5 303 are explained in Appendix 1/Supplementary file 1 and Appendix 3/Supplementary file 3.

6  
7  
8 304

9  
10 305 **Data collection**

11 306 On-site interviewers will be trained on locating the geographic points, identification of respondents,  
12 307 informed consent procedures with emphasis on voluntary participation, and the deployment of  
13 308 standardized, pre-tested study forms (Appendix 2/Supplementary file 2 and Appendix  
14 309 3/Supplementary file 3) prior to the initiation of HPAfrica. Informed consent and study forms will be  
15 310 forward-translated into the country-specific official language by two independent bilingual translators  
16 311 fluent in English and native speakers of the target language who are familiar with the concept and  
17 312 terminology of the forms. Both translations will be compared for discrepancies together with the  
18 313 translators and a coordinator, and consensus will be sought. The synthesized forward translation will  
19 314 be back-translated from the target language into English by two independent translators blinded to the  
20 315 original forms. Consensus on discrepancies of translations and the original forms will be sought  
21 316 together with the translators and a coordinator. Translated forms will be pilot-tested among a  
22 317 convenience sample of households of the target population prior to their finalization to assure cross-  
23 318 cultural comprehensibility and semantic, idiomatic, experiential and conceptual equivalence. A  
24 319 translation report will be prepared.[53, 54]

25  
26  
27  
28  
29  
30  
31  
32  
33  
34  
35  
36  
37  
38  
39  
40 320

41 321 **Data management**

42 322 Management of data will depend on the mode of collection, which will be primarily electronic rather  
43 323 than paper-based. Past experiences showed following disadvantages of paper-based data collection: a  
44 324 high probability of errors while filling study forms, and the need of subsequent data digitalization,  
45 325 which is an extra, labor- and time-intensive and error-prone step. Electronic data capturing using an  
46 326 application for a mobile device like smartphone or tablet minimizes these limiting factors to the data  
47 327 quality.

48  
49  
50  
51  
52  
53  
54  
55 328

1  
2  
3  
4 329 There may be a pilot period during which both paper-based and paperless data will be collected prior  
5  
6 330 to full implementation of electronic data collection. The latter utilizes the Android application “HPA  
7  
8 331 Collect” (Google Android 5.0.1 9API 23; available at  
9  
10 332 <https://play.google.com/store/apps/details?id=anint.ivi.hpa>) and the platform “HPA Web” (CSS,  
11  
12 333 JavaScript and JSP; available at <http://hpa.ivi.int/>), which are accompanied by a variable dictionary  
13  
14 334 containing codes, meaning and properties of variables in at least English and French. Both, “HPA  
15  
16 335 Collect” and “HPA Web”, will be designed specifically for the purpose of this study. IVI’s expertise in  
17  
18 336 computer engineering allows the fundamental construction, configuration and development of  
19  
20 337 components required. Different from many open-source programs, a server installation feature enables  
21  
22 338 the storage of all original data collected on the institutional server besides extra features for deep-error  
23  
24 339 checking, logical relations between variables and forms, search functions, and analyzing and  
25  
26 340 displaying of data collected. Stable wireless internet connectivity using default browsers is required to  
27  
28 341 assure a contemporaneous, attributable, original and accurate synchronization of data between “HPA  
29  
30 342 Collect” and “HPA Web”. Access to both “HPA Collect” and “HPA Web” is password-protected.  
31  
32 343 Appendix 5/Supplementary file 5 displays the system diagram, which has the following features:

33  
34

#### 345 **Structure or features of “HPA Collect”**

- 346 • **User management:** A simple user interface provides different privileges for users to enter,  
347 edit (except for study labels), and export or transfer data. It establishes an audit trail that  
348 records when users enter data into the server.
- 349 • **Data input:** Data are entered directly into the smartphone or tablet device. Entry fields  
350 limit possible answers to plausible ones only by offering different input methods:
  - 351 ▪ Edit Text: free text
  - 352 ▪ Radio group/Multi click button: single choice
  - 353 ▪ Check box: multiple choice
  - 354 ▪ Date and time picker: entering date and time
  - 355 ▪ Spinner: drop-down button

- 1  
2  
3  
4 356 Additional features allow the surveyor to save time by transferring data collected at an  
5  
6 357 earlier stage to data fields required at a later stage of the interview by performing  
7  
8 358 plausibility checks for diverse data input fields, and by easily recognizing skip patterns.  
9  
10 359 Error checks, missing data notifications, code errors, and logical errors are also included.  
11  
12 360 • **Data view:** Raw, originally entered data can be seen in the same, human- and machine-  
13  
14 361 readable format, namely the JSON format, as they will be transferred to a database server  
15  
16 362 (Windows, MySQL). Additional functions like “clear” to clear all records, “reset” to  
17  
18 363 return back to the main data view page, and “search” to search for a study label are  
19  
20 364 available.
- 21  
22 365 • **Export:** All entered data will be sent to the IVI server through wireless internet  
23  
24 366 connection. Each form record having a unique study label of the household enrolled is  
25  
26 367 transformed into a SQL insertion query and inserted onto the server only if there is no  
27  
28 368 duplicated study label found. Insertion of data will be ignored in case of duplicated study  
29  
30 369 labels.
- 31  
32 370 • **Export to local:** All data entered will be backed-up threefold on a public storage folder  
33  
34 371 of the mobile device as JSON and txt formats. Txt files contain data of each individual  
35  
36 372 form. One version of JSON files contain data by each individual form and a second  
37  
38 373 version of JSON files contain all data of a household enrolled. Data in the JSON format  
39  
40 374 can be extracted by USB or wireless internet connection.
- 41  
42 375 • **Report:** This feature allows a user to report any query to the leading “HPA Collect”  
43  
44 376 administrator at IVI by e-mail or a third-party application.
- 45  
46 377 • **Settings:** The ability to switch the system language between English and French is  
47  
48 378 provided.
- 49  
50 379 • **About:** The currently installed version of “HPA Collect” is displayed.  
51  
52 380

### 381 Structure or features of “HPA Web”

- 53  
54  
55  
56 382 • **Home:** An introduction to the platform is given and a tutorial in French and English will

- 1  
2  
3  
4 383 be accessible.
- 5  
6 384 • **Form View:** The study forms are displayed separately showing every question and the  
7  
8 385 corresponding input data as defined variables.
- 9  
10 386 • **Form Edit:** This feature allows the correction of the uploaded data. It is only accessible  
11  
12 387 to data managers in each participating country and at IVI.
- 13  
14 388 • **Search:** Specific study labels given to each study form can be filtered.
- 15  
16 389 • **Variable dictionary:** The variable dictionary can be downloaded.
- 17  
18 390 • **Export:** Data can be converted from the server into a transferrable excel file.
- 19  
20 391 • **Contact Us:** Quick and easy correspondence between users and the data manager at IVI  
21  
22 392 is given.
- 23  
24 393

25  
26 394 Data will be reviewed by key study personnel on a day-to-day basis and checked for consistency and  
27  
28 395 accuracy prior to data analysis. The quality of data may be checked by selecting a subset of 5% for  
29  
30 396 validation against the original, paper-based data if possible. Names of household members will not be  
31  
32 397 linked to study forms of HPAfrica and will not be recorded in the database in order to ensure  
33  
34 398 confidentiality. Access to the database will be restricted to authorized study personnel only and data  
35  
36 399 will be kept in a locked, protected location. Periodic interim backup files and at least three final  
37  
38 400 backup files of the database stored in a secure, locked place will avoid loss of data and ensure data  
39  
40 401 safety. All data will be stored for a minimum of five years.

41  
42 402

#### 403 **Data analysis**

44  
45 404 Combined sampling weights will be computed to adjust for possible differences in selection  
46  
47 405 probabilities and to increase the accuracy of study estimates.[22, 55] Weights are generated in a multi-  
48  
49 406 level approach to consider selection probabilities of e.g. households, inverse weights within  
50  
51 407 households (i.e., multi-family single-story structure, multi-family multi-story structure) and inverse  
52  
53 408 weights within household members participating in the HPAfrica study.[21, 39] Open-source tools,  
54  
55 409 census data and HPAfrica-generated data such as the population size, the number of households or

1  
2  
3  
4 410 structures, the number of households within multi-family/multi-story structures and the household  
5  
6 411 size by stratum will be used to compute sampling weights.[56, 57]  
7  
8 412  
9  
10 413 Descriptive analyses such as absolute and relative frequencies, medians or arithmetic means will be  
11  
12 414 conducted to construct a contemporary baseline population description. Basic analyses will include  
13  
14 415 the calculation of age- and sex-stratified proportions of *generic* and *actual* health behavior, including  
15  
16 416 healthcare utilization, for various signs and symptoms or combinations of signs and symptoms. These  
17  
18 417 analyses will allow for a gradual classification based on disease severity, including 95% confidence  
19  
20 418 interval. Health behavior will be adjusted for actual clustering among household members. Most up-  
21  
22 419 to-date stratified population data by site and demographic data derived from HPAfrica will be used to  
23  
24 420 generate the proportions for the adjustment of incidence calculations.  
25

26 421  
27 422 Socio-economic information collected will be used to construct wealth indices of studied populations  
28  
29 423 by applying factor analyses based on the principal component method. In addition, bi- and  
30  
31 424 multivariate regression analyses will be performed to identify potential confounding factors or effect  
32  
33 425 modification using factor scores.  
34

35 426  
36  
37 427 Bi- and multivariate regression analyses will be carried out using factor scores for the assessment  
38  
39 428 of the following variables:

- 40  
41 429
- 42 • Socioeconomic data such as education, occupation,[58] health insurance, housing, and  
43 household assets
  - 44
  - 45 431 • Hygiene and sanitation such as toilet access, water sources, food handling, waste disposal,  
46 and animal contacts
  - 47 432
  - 48 433 • Health behavior: *actual* (age- and sex-stratified, severity, frequency), *generic* (age- and  
49 sex-stratified, severity, rating by choice)
  - 50 434
  - 51 435 • Travel modalities to health facilities, age-stratified
  - 52
  - 53 436 • Seasonality related to hygiene & sanitation, health behavior, travel modalities
  - 54
  - 55
  - 56
  - 57
  - 58
  - 59
  - 60

- 437 • Cultural/religious/ethnographic factors, age-stratified
- 438 • Vaccination status among children[18, 19]
- 439 • Knowledge and perception of common diseases

440

#### 441 **Ethical considerations**

442 All study participants are required to provide written informed consent. There are no direct benefits  
443 for enrolled households and their members. Indirect benefits for the general population at sites will be  
444 the updated information on the burden of communicable diseases, including factors influencing  
445 disease transmission and infection. The HPAfrica study generates evidence to support decision-  
446 makers on the introduction of appropriate measures for disease prevention and control.

447

448 This protocol was first approved by the Institutional Review Board of the International Vaccine  
449 Institute in October 2016 and undergoes annual review and renewal also by Ethics Committees of  
450 collaborating institutions (Ethics References are listed in Appendix1/Supplementary file1).

451

452 During and after the HPAfrica study, all data of enrolled subjects will be kept in strict confidence and  
453 will not be disclosed to a third party by any member of the research team. Password protection of  
454 devices and the database is used for strict confidence. All paper-based data (consent forms) will be  
455 kept in a secure, locked location. Confidential information stored on computers and paper-based data  
456 sources will only be made available to co-investigators and IVI staff directly involved in study  
457 activities of HPAfrica.

458

#### 459 **Patient and Public Involvement**

460 No patients but household members in selected study sites will be involved. They did not participate  
461 in the development of the research question, outcome measures and the study design. However, we  
462 attempt to balance well between answering our study objectives and benefiting the general population  
463 at the sites by disseminating information on the disease burden and factors influencing disease

1  
2  
3  
4 464 transmission and infection derived from our study. Household members will contribute to the study  
5  
6 465 conduct by direct participating in the gathering of data. They will not be involved in recruitment  
7  
8 466 procedures. The households selected for participation will be identified purely by chance due to the  
9  
10 467 random sampling applied. Study findings will be disseminated to study populations directly through  
11  
12 468 collaborating institutions and indirectly through publications in peer-reviewed journals.

13  
14 469

#### 15 16 470 **Dissemination**

17  
18 471 We plan to disseminate the study findings by reporting descriptive as well as analytic and stratified  
19  
20 472 data through publications in peer-reviewed journals and collaborating institutions.

21  
22 473

#### 23 24 474 **Authors' contributions**

25  
26 475 GDP, JKP and UP conceptualized the initial study concept of the HPAfrica study. HWS and GHJ  
27  
28 476 developed the tools “HPA Collect” and “HPA Web” for electronic data collection with primary  
29  
30 477 support of UP and AH. IO and JA supported the development and finalizing of the data collection  
31  
32 478 tools “HPA Collect” and “HPA Web”. MR and RR supported the development and finalization of the  
33  
34 479 HPAfrica study forms. The appendices were conceptualized by GDP, JKP, YC, JI, TT, AH and UP.  
35  
36 480 IO, JA, RB, LMCE, JI, HJJ, SL, OLM, WMW, ODM, INO, EOD, SP, OP, HJS, ABS, MT, TT, MR  
37  
38 481 and RR supported the further development of the initial study protocol and appendices. FM, YC and  
39  
40 482 CGM participated in the finalization of the study protocol, including appendices. AH wrote the first  
41  
42 483 draft of the manuscript. GDP, HWS, IO, JA, RB, LMCE, MH, JI, GHJ, HJJ, SL, OLM, WMW, ODM,  
43  
44 484 INO, EOD, JKP, SP, OP, HJS, ABS, MT, TT, YC, MR, RR, CGM and FM critically reviewed and  
45  
46 485 revised the manuscript draft. GDP, AH, HWS, IO, JA, RB, LMCE, MH, JI, GHJ, HJJ, SL, OLM,  
47  
48 486 WMW, ODM, INO, EOD, JKP, SP, OP, HJS, ABS, MT, TT, YC, MR, RR, CGM, FM and UP agreed  
49  
50 487 and approved the final manuscript as submitted.

51  
52 488

#### 53 54 489 **Acknowledgement**



1  
2  
3  
4 490 We thank David Kauderer for the support and advice in computer engineering, Dr. Paul M. Tshiminyi  
5  
6 491 for the support in proofreading French study materials, and Soo Young Kwon and Ji Hyun Han for  
7  
8 492 administrative support. We are grateful to community leaders and site representatives for their  
9  
10 493 assistance and facilitation in properly approaching household members for our study.  
11  
12 494

### 13 495 **Funding statement**

14  
15 496 This study was supported by the Bill & Melinda Gates Foundation (OPP1127988). The funders had  
16  
17 497 no role in study design, data collection, data analysis, data interpretation, or writing of the report; the  
18  
19 498 conclusions and findings presented are those of the authors and do not necessarily reflect positions or  
20  
21 499 policies of the Bill & Melinda Gates Foundation or the International Vaccine Institute (IVI). The IVI  
22  
23 500 acknowledges its donors, including the Republic of Korea and the Swedish International Development  
24  
25 501 Cooperation Agency (Sida).  
26  
27 502

### 28 503 **Competing interests**

29  
30 504 The authors declare that they have no competing interests.  
31  
32 505

### 33 506 **Abbreviations**

34  
35 507 JSON: JavaScript Objective Notation; CSS: Cascading Style Sheets; JSP: Java Server Page; SQL:  
36  
37 508 Structured Query Language  
38  
39 509

### 40 510 **Appendices**

41  
42 511 **Appendix 1** (Supplementary file 1)

43  
44 512 Ethic References

45  
46 513 Definitions/Terminology (English)

47  
48 514 STROBE Statement—Checklist of items that should be included in reports of cross-sectional  
49  
50 515 studies

51  
52 516 **Appendix 2** (Supplementary file 2)

|    |     |                                                                                         |
|----|-----|-----------------------------------------------------------------------------------------|
| 1  |     |                                                                                         |
| 2  |     |                                                                                         |
| 3  |     |                                                                                         |
| 4  | 517 | Study Forms (English)                                                                   |
| 5  |     |                                                                                         |
| 6  | 518 | Form 1: Record of household visits                                                      |
| 7  |     |                                                                                         |
| 8  | 519 | Form 2: Consent Form                                                                    |
| 9  |     |                                                                                         |
| 10 | 520 | Form 3: General household information                                                   |
| 11 |     |                                                                                         |
| 12 | 521 | Part A: Demographic data/General household information                                  |
| 13 |     |                                                                                         |
| 14 | 522 | Part B: Socio-economic data                                                             |
| 15 |     |                                                                                         |
| 16 | 523 | Part C: Hygiene and sanitation                                                          |
| 17 |     |                                                                                         |
| 18 | 524 | Form 4: Assessment of age- and sex-stratified <i>generic</i> healthcare utilization     |
| 19 |     |                                                                                         |
| 20 | 525 | Part A: Assessment of <i>generic</i> healthcare utilization                             |
| 21 |     |                                                                                         |
| 22 | 526 | Part B: Healthcare-associated factors/Vaccination/Disease perception                    |
| 23 |     |                                                                                         |
| 24 | 527 | Form 5: Assessment of age- and sex-stratified <i>actual</i> healthcare utilization      |
| 25 |     |                                                                                         |
| 26 | 528 | <b>Appendix 3</b> (Supplementary file 3)                                                |
| 27 |     |                                                                                         |
| 28 | 529 | Protocol, Definitions/Terminology and Study Forms (French)                              |
| 29 |     |                                                                                         |
| 30 | 530 | <b>Appendix 4</b> (Supplementary file 4)                                                |
| 31 |     |                                                                                         |
| 32 | 531 | Geospatial random selection (examples of Ghana and Madagascar)                          |
| 33 |     |                                                                                         |
| 34 | 532 | <b>Appendix 5</b> (Supplementary file 5)                                                |
| 35 |     |                                                                                         |
| 36 | 533 | System diagram of the data collection and data management: the Android application “HPA |
| 37 |     |                                                                                         |
| 38 | 534 | Collect” and the platform “HPA Web”.                                                    |
| 39 |     |                                                                                         |
| 40 | 535 |                                                                                         |

## References

- |    |     |                                                                                                               |
|----|-----|---------------------------------------------------------------------------------------------------------------|
| 41 | 536 |                                                                                                               |
| 42 | 537 |                                                                                                               |
| 43 |     |                                                                                                               |
| 44 | 538 | 1. Bigogo, G., et al., <i>Health-seeking patterns among participants of population-based</i>                  |
| 45 | 539 | <i>morbidity surveillance in rural western Kenya: implications for calculating disease rates.</i> Int         |
| 46 | 540 | J Infect Dis, 2010. <b>14</b> (11): p. e967-73.                                                               |
| 47 |     |                                                                                                               |
| 48 | 541 | 2. Jordan, H.T., et al., <i>A comparison of population-based pneumonia surveillance and health-</i>           |
| 49 | 542 | <i>seeking behavior in two provinces in rural Thailand.</i> Int J Infect Dis, 2009. <b>13</b> (3): p. 355-61. |
| 50 |     |                                                                                                               |
| 51 | 543 | 3. Saeed, B.I., et al., <i>Impact of socioeconomic status and medical conditions on health and</i>            |
| 52 | 544 | <i>healthcare utilization among aging Ghanaians.</i> BMC Public Health, 2015. <b>15</b> : p. 276.             |
| 53 |     |                                                                                                               |
| 54 | 545 | 4. Thoa, N.T., et al., <i>The impact of economic growth on health care utilization: a longitudinal</i>        |
| 55 | 546 | <i>study in rural Vietnam.</i> Int J Equity Health, 2013. <b>12</b> : p. 19.                                  |

- 1  
2  
3  
4 547 5. Okafor, I.P., et al., *Orthodox versus unorthodox care: A qualitative study on where rural*  
5 548 *women seek healthcare during pregnancy and childbirth in Southwest, Nigeria*. *Malawi*  
6 549 *Med J*, 2014. **26**(2): p. 45-9.
- 8 550 6. Farag, T.H., et al., *Seeking care for pediatric diarrheal illness from traditional healers in*  
9 551 *Bamako, Mali*. *Am J Trop Med Hyg*, 2013. **89**(1 Suppl): p. 21-8.
- 11 552 7. Akullian, A., et al., *Environmental Transmission of Typhoid Fever in an Urban Slum*. *PLoS*  
12 553 *Negl Trop Dis*, 2015. **9**(12): p. e0004212.
- 13 554 8. Steele, A.D., et al., *Challenges and Opportunities for Typhoid Fever Control: A Call for*  
15 555 *Coordinated Action*. *Clin Infect Dis*, 2016. **62 Suppl 1**: p. S4-8.
- 16 556 9. Tran, H.H., et al., *Risk factors associated with typhoid fever in Son La province, northern*  
17 557 *Vietnam*. *Trans R Soc Trop Med Hyg*, 2005. **99**(11): p. 819-26.
- 19 558 10. Rweyemamu, M., et al., *Development of a One Health National Capacity in Africa : the*  
20 559 *Southern African Centre for Infectious Disease Surveillance (SACIDS) One Health Virtual*  
21 560 *Centre Model*. *Curr Top Microbiol Immunol*, 2013. **366**: p. 73-91.
- 23 561 11. Slayton, R.B., K.A. Date, and E.D. Mintz, *Vaccination for typhoid fever in sub-Saharan*  
24 562 *Africa*. *Hum Vaccin Immunother*, 2013. **9**(4): p. 903-6.
- 25 563 12. Sharma, P.K., et al., *Risk factors for typhoid in Darjeeling, West Bengal, India: evidence for*  
26 564 *practical action*. *Trop Med Int Health*, 2009. **14**(6): p. 696-702.
- 28 565 13. Eguale, T., et al., *Non-typhoidal Salmonella serotypes, antimicrobial resistance and co-*  
29 566 *infection with parasites among patients with diarrhea and other gastrointestinal*  
30 567 *complaints in Addis Ababa, Ethiopia*. *BMC Infect Dis*, 2015. **15**: p. 497.
- 32 568 14. Paudyal, N., et al., *Prevalence of foodborne pathogens in food from selected African*  
33 569 *countries - A meta-analysis*. *Int J Food Microbiol*, 2017. **249**: p. 35-43.
- 35 570 15. Panzner, U., et al., *Utilization of Healthcare in the Typhoid Fever Surveillance in Africa*  
36 571 *Program*. *Clin Infect Dis*, 2016. **62 Suppl 1**: p. S56-68.
- 38 572 16. von Kalckreuth, V., et al., *The Typhoid Fever Surveillance in Africa Program (TSAP): Clinical,*  
39 573 *Diagnostic, and Epidemiological Methodologies*. *Clin Infect Dis*, 2016. **62 Suppl 1**: p. S9-  
40 574 S16.
- 42 575 17. Park, S.E., et al., *The Severe Typhoid in Africa Program: a multicentre population-based*  
43 576 *surveillance program with a nested case-control and cohort study*. under submission.
- 44 577 18. WHO. *WHO vaccine-preventable diseases: monitoring system. 2017 global summary 2017*  
45 578 [cited 2017 December 17]; Available from:  
47 579 [http://apps.who.int/immunization\\_monitoring/globalsummary/schedules/](http://apps.who.int/immunization_monitoring/globalsummary/schedules/).
- 48 580 19. WHO, *WHO recommendations for routine immunization - summary tables*, 2017.
- 49 581 20. *GridSample*. accessed June 2018]; Available from: [www.gridsample.org](http://www.gridsample.org).
- 51 582 21. Thomson, D.R., et al., *Modelling strategic interventions in a population with a total fertility*  
52 583 *rate of 8.3: a cross-sectional study of Idjwi Island, DRC*. *BMC Public Health*, 2012. **12**: p.  
54 584 959.

- 1  
2  
3  
4 585 22. Thomson, D.R., et al., *GridSample: an R package to generate household survey primary*  
5 586 *sampling units (PSUs) from gridded population data*. Int J Health Geogr, 2017. **16**(1): p. 25.  
6  
7 587 23. Galway, L., et al., *A two-stage cluster sampling method using gridded population data, a*  
8 588 *GIS, and Google Earth(TM) imagery in a population-based mortality survey in Iraq*. Int J  
9 589 Health Geogr, 2012. **11**: p. 12.  
10  
11 590 24. Muñoz, J. and W. Langeraar, *A census-independent sampling strategy for a household*  
12 591 *survey in Myanmar*. . 2013.  
13  
14 592 25. Fleiss, J.L., Levin, B., Paik, M.C., *Statistical Methods for Rates and Proportions*. 3rd ed2003,  
15 593 New York: John. Wiley & Sons.  
16  
17 594 26. Henderson, R.H., et al., *Assessment of vaccination coverage, vaccination scar rates, and*  
18 595 *smallpox scarring in five areas of West Africa*. Bull World Health Organ, 1973. **48**(2): p.  
19 596 183-94.  
20  
21 597 27. Henderson, R.H. and T. Sundaresan, *Cluster sampling to assess immunization coverage: a*  
22 598 *review of experience with a simplified sampling method*. Bull World Health Organ, 1982.  
23 599 **60**(2): p. 253-60.  
24  
25 600 28. Chakraborty, H., et al., *A simulation based technique to estimate intracluster correlation*  
26 601 *for a binary variable*. Contemp Clin Trials, 2009. **30**(1): p. 71-80.  
27  
28 602 29. Segura-Correa, J.C., et al., *Intraherd correlation coefficients and design effects for bovine*  
29 603 *viral diarrhoea, infectious bovine rhinotracheitis, leptospirosis and neosporosis in cow-calf*  
30 604 *system herds in North-eastern Mexico*. Prev Vet Med, 2010. **96**(3-4): p. 272-5.  
31  
32 605 30. Katz, J. and S.L. Zeger, *Estimation of design effects in cluster surveys*. Ann Epidemiol, 1994.  
33 606 **4**(4): p. 295-301.  
34  
35 607 31. van Breukelen, G.J. and M.J. Candel, *Calculating sample sizes for cluster randomized trials:*  
36 608 *we can keep it simple and efficient!* J Clin Epidemiol, 2012. **65**(11): p. 1212-8.  
37  
38 609 32. Kaiser, R., et al., *Using design effects from previous cluster surveys to guide sample size*  
39 610 *calculation in emergency settings*. Disasters, 2006. **30**(2): p. 199-211.  
40  
41 611 33. Katz, J., et al., *Estimation of design effects and diarrhea clustering within households and*  
42 612 *villages*. Am J Epidemiol, 1993. **138**(11): p. 994-1006.  
43  
44 613 34. Newcombe, R.G., *Two-sided confidence intervals for the single proportion: comparison of*  
45 614 *seven methods*. Stat Med, 1998. **17**(8): p. 857-72.  
46  
47 615 35. Panzner, U., et al., *Geospatial sampling frames for household-based studies: Lessons*  
48 616 *learned from a multi-country surveillance network in Senegal, South Africa and Sudan*.  
49 617 2018 (submitted).  
50  
51 618 36. Kumar, N., *Spatial Sampling Design for a Demographic and Health Survey*. Population  
52 619 Research and Policy Review, 2007. **26**(5/6): p. 581-599.  
53  
54 620 37. Siri, J.G., et al., *A census-weighted, spatially-stratified household sampling strategy for*  
55 621 *urban malaria epidemiology*. Malar J, 2008. **7**: p. 39.

- 1  
2  
3  
4 622 38. Sollom, R., et al., *Health and human rights in Chin State, Western Burma: a population-*  
5 623 *based assessment using multistaged household cluster sampling.* PLoS Med, 2011. **8**(2): p.  
6 624 e1001007.
- 8 625 39. Shannon, H.S., et al., *Choosing a survey sample when data on the population are limited:*  
9 626 *a method using Global Positioning Systems and aerial and satellite photographs.* Emerg  
10 627 Themes Epidemiol, 2012. **9**(1): p. 5.
- 12 628 40. Grais, R.F., A.M. Rose, and J.P. Guthmann, *Don't spin the pen: two alternative methods for*  
13 629 *second-stage sampling in urban cluster surveys.* Emerg Themes Epidemiol, 2007. **4**: p. 8.
- 15 630 41. Lohr, S.L., *Sampling: Design and Analysis.* 2nd edition ed2010, Pacific Grove, CA: Duxbury  
16 631 Press.
- 18 632 42. Lister, A.J. and C.T. Scott, *Use of space-filling curves to select sample locations in natural*  
19 633 *resource monitoring studies.* Environ Monit Assess, 2009. **149**(1-4): p. 71-80.
- 21 634 43. Keating, J., et al., *A geographic sampling strategy for studying relationships between*  
22 635 *human activity and malaria vectors in urban Africa.* Am J Trop Med Hyg, 2003. **68**(3): p.  
23 636 357-65.
- 24 637 44. Keating, J., et al., *Characterization of potential larval habitats for Anopheles mosquitoes in*  
25 638 *relation to urban land-use in Malindi, Kenya.* Int J Health Geogr, 2004. **3**(1): p. 9.
- 27 639 45. ArcGIS. October 2017]; Available from: [http://pro.arcgis.com/en/pro-app/tool-](http://pro.arcgis.com/en/pro-app/tool-reference/data-management/create-random-points.htm)  
28 640 [reference/data-management/create-random-points.htm](http://pro.arcgis.com/en/pro-app/tool-reference/data-management/create-random-points.htm).
- 30 641 46. Wong, W.C., et al., *Prevalence and risk factors of chlamydia infection in Hong Kong: A*  
31 642 *population-based geospatial household survey and testing.* PLoS One, 2017. **12**(2): p.  
32 643 e0172561.
- 34 644 47. Kondo, M.C., et al., *A random spatial sampling method in a rural developing nation.* BMC  
35 645 public health, 2014. **14**: p. 338.
- 37 646 48. Kasper, M.R., et al., *Infectious etiologies of acute febrile illness among patients seeking*  
38 647 *health care in south-central Cambodia.* Am J Trop Med Hyg, 2012. **86**(2): p. 246-53.
- 39 648 49. Dewan, A.M., et al., *Typhoid Fever and its association with environmental factors in the*  
40 649 *Dhaka Metropolitan Area of Bangladesh: a spatial and time-series approach.* PLoS Negl  
41 650 Trop Dis, 2013. **7**(1): p. e1998.
- 43 651 50. Naeem Khan, M., et al., *Typhoid fever in paediatric patients in Quetta, Balochistan,*  
44 652 *Pakistan.* Pak J Med Sci, 2013. **29**(4): p. 929-32.
- 46 653 51. Crump, J.A., et al., *Estimating the incidence of typhoid fever and other febrile illnesses in*  
47 654 *developing countries.* Emerg Infect Dis, 2003. **9**(5): p. 539-44.
- 49 655 52. Osei-Tutu, B. and F. Anto, *Trends of reported foodborne diseases at the Ridge Hospital,*  
50 656 *Accra, Ghana: a retrospective review of routine data from 2009-2013.* BMC Infect Dis,  
51 657 2016. **16**: p. 139.
- 53 658 53. Koller, M., et al., *Translation procedures for standardised quality of life questionnaires: The*  
54 659 *European Organisation for Research and Treatment of Cancer (EORTC) approach.* Eur J  
55 660 Cancer, 2007. **43**(12): p. 1810-20.

- 1  
2  
3  
4 661 54. Acquadro, C., et al., *Literature review of methods to translate health-related quality of life*  
5 662 *questionnaires for use in multinational clinical trials*. Value Health, 2008. **11**(3): p. 509-21.  
6  
7 663 55. Milligan, P., A. Njie, and S. Bennett, *Comparison of two cluster sampling methods for*  
8 664 *health surveys in developing countries*. Int J Epidemiol, 2004. **33**(3): p. 469-76.  
9  
10 665 56. Kamanga, A., et al., *Open-source satellite enumeration to map households: planning and*  
11 666 *targeting indoor residual spraying for malaria*. Malar J, 2015. **14**: p. 345.  
12  
13 667 57. Elsey, H., et al., *Addressing Inequities in Urban Health: Do Decision-Makers Have the Data*  
14 668 *They Need? Report from the Urban Health Data Special Session at International*  
15 669 *Conference on Urban Health Dhaka 2015*. J Urban Health, 2016. **93**(3): p. 526-37.  
16  
17 670 58. (ILO), I.L.O. *International Standard Classification of Occupations ISCO-08, 2012*. [cited  
18 671 accessed December 2017; Available from: [http://www.ilo.org/wcmsp5/groups/public/---](http://www.ilo.org/wcmsp5/groups/public/---dgreports/---dcomm/---publ/documents/publication/wcms_172572.pdf)  
19 672 [dgreports/---dcomm/---publ/documents/publication/wcms\\_172572.pdf](http://www.ilo.org/wcmsp5/groups/public/---dgreports/---dcomm/---publ/documents/publication/wcms_172572.pdf).  
20  
21 673  
22  
23 674  
24 675

**Appendix 1/Supplementary file 1:****Ethic References****Definitions/Terminology (English)****STROBE Statement—Checklist of items that should be included in reports of *cross-sectional studies*****Ethics References**

- IVI Institutional Review Board (IRB), No. 2016-003
- Institute of Tropical Medicine Antwerp Institutional Review Board, Belgium
- Universiteit Antwerpen, Comité voor medische Ethiek, Belgium
- Ministère de la Santé du Burkina Faso – Comité d’Ethique pour la Recherche en Santé, Burkina Faso
- Comité d’Ethique de l’Ecole de Santé Publique de l’Université de Kinshasa, Democratic Republic of Congo
- National Research Ethics Review committee (NRERC) Ministry of Science and Technology, Federal Democratic Republic of Ethiopia
- AHRI-ALERT Ethics Review Committee (AAERC), Ethiopia
- Kwame Nkrumah University of Science and Technology, School of Medical Sciences/Komfo Anokye Teaching Hospital, Committee on Human Research, Publication and Ethics, Ghana
- Ministère de la Santé du Repoblikan’l Madagaskar – Comité d’Ethique
- University of Ibadan/University College Hospital Ethics Committee, Ibadan, Nigeria

**Definitions/Terminology (English)**

| <b>A</b>                                       |                                                                                                                                                                                                                                                                                         |
|------------------------------------------------|-----------------------------------------------------------------------------------------------------------------------------------------------------------------------------------------------------------------------------------------------------------------------------------------|
| Abdominal pain/<br>Intestinal pain             | Pain (acute/short-lived or chronic/long-lived) that occurs anywhere between the chest and the groin (often referred to as the stomach region/belly).                                                                                                                                    |
| Aches/Pain                                     | A condition of having continuous/prolonged dull pain in a part of the body; the physical feeling, suffering, or discomfort caused by an illness or injury.                                                                                                                              |
| <b>B</b>                                       |                                                                                                                                                                                                                                                                                         |
| Bleeding<br>(internal/external)/<br>Blood loss | The condition of losing blood from the vascular system, either internally into the body (internal bleeding) or externally through a natural orifice or break in the skin (external bleeding); blood escaping from an injured blood vessel.                                              |
| Blood loss/<br>Bleeding                        | The condition of losing blood from the vascular system, either internally into the body (internal bleeding) or externally through a natural orifice or break in the skin (external bleeding); blood escaping from an injured blood vessel.                                              |
| Blood pressure<br>disorders                    | A high/low blood pressure or a blood pressure that shows excessive fluctuation.                                                                                                                                                                                                         |
| <b>C</b>                                       |                                                                                                                                                                                                                                                                                         |
| Chills/Shivering                               | The sensation of coldness that could be accompanied by shivering or shaking of the body and pallor of the skin.                                                                                                                                                                         |
| Cholera                                        | An infectious, sometimes fatal disease of the small intestine caused by the bacterium <i>Vibrio cholerae</i> ; it is spread via the fecal-oral route from the ingestion of contaminated water and food and causes chills, shivering, severe watery diarrhea, vomiting, and dehydration. |
| Confusion/Dizziness/<br>Unconsciousness        | The state of being bewildered or unclear in mind; an abnormal state of response to stimuli in the environment; faint, wooziness, weakness, unsteadiness or a tendency to fall; the interruption of the awareness of oneself and one's surroundings.                                     |
| Convulsion                                     | The sudden, violent, irregular movement of a limb/part of the body or of the entire body which is caused by involuntary contraction of muscles.                                                                                                                                         |
| Cough                                          | The condition of expelling air from the lungs suddenly/rapidly and with a harsh noise; often involuntarily in order to clear the lung airways of fluids/mucus/other material.                                                                                                           |
| <b>D</b>                                       |                                                                                                                                                                                                                                                                                         |

|    |                                                |                                                                                                                                                                     |
|----|------------------------------------------------|---------------------------------------------------------------------------------------------------------------------------------------------------------------------|
| 1  | Dehydration                                    | A condition of excessive loss of water/moisture from the body.                                                                                                      |
| 2  | Diarrhea                                       | A condition of passing feces from the body very frequently and in a liquid rather                                                                                   |
| 3  |                                                | than solid form.                                                                                                                                                    |
| 4  | Diphtheria                                     | A highly contagious, sometimes fatal disease caused by the bacterium                                                                                                |
| 5  |                                                | <i>Corynebacterium diphtheriae</i> . It is spread from person-to-person, through the air or                                                                         |
| 6  |                                                | contaminated objects and affects the upper respiratory tract. Common symptoms                                                                                       |
| 7  |                                                | are sore throat, swollen glands/ lymph nodes, malaise, fever/chills, a membranous                                                                                   |
| 8  |                                                | substance/thick gray material that forms in the throat/tonsils and makes it difficult to                                                                            |
| 9  |                                                | breathe/ rapid breathing ("barking cough") and swallow. A form of diphtheria that                                                                                   |
| 10 |                                                | involves the skin, eyes, or genitals is also reported and is characterized by pain,                                                                                 |
| 11 |                                                | redness, and swelling of the skin.                                                                                                                                  |
| 12 | Dizziness/Confusion/<br>Unconsciousness        | The state of being bewildered or unclear in mind; an abnormal state of response to                                                                                  |
| 13 |                                                | stimuli in the environment; faint, wooziness, weakness, unsteadiness or a tendency                                                                                  |
| 14 |                                                | to fall; the interruption of the awareness of oneself and one's surroundings.                                                                                       |
| 15 |                                                |                                                                                                                                                                     |
| 16 | <b>E</b>                                       |                                                                                                                                                                     |
| 17 | Edema/Swelling                                 | The excess collection of a watery fluid/swelling in the cavities or tissues of the body;                                                                            |
| 18 |                                                | it's commonly noticed in the hands/arms/feet/legs; volume increase of tissue.                                                                                       |
| 19 | Education - formal                             | A systematic, organized education model that is structured and administered                                                                                         |
| 20 |                                                | according to a given set of laws and norms; formal education institutions are                                                                                       |
| 21 |                                                | administratively, physically and curricularly organized and require a minimum                                                                                       |
| 22 |                                                | classroom attendance from students; it involves intermediate and final assessments                                                                                  |
| 23 |                                                | in order to advance to the next learning stage; it confers degrees and diplomas                                                                                     |
| 24 |                                                | pursuant to a quite strict set of regulations.                                                                                                                      |
| 25 | <b>F</b>                                       |                                                                                                                                                                     |
| 26 | Fatigue/Malaise/<br>Weakness                   | The state of feeling tired, exhausted, or weak; a general feeling of discomfort,                                                                                    |
| 27 |                                                | uneasiness, unhealthiness, or unhappiness.                                                                                                                          |
| 28 | Fever, any                                     | An abnormally high body temperature (usually above 38°C).                                                                                                           |
| 29 | Fever <3 days                                  | An abnormally high body temperature (usually above 38°C) that appears                                                                                               |
| 30 |                                                | continuously for less than 3 days.                                                                                                                                  |
| 31 | Fever >3 days                                  | An abnormally high body temperature (usually above 38°C) that lasts longer than 3                                                                                   |
| 32 |                                                | days and appears continuously.                                                                                                                                      |
| 33 | <b>G</b>                                       |                                                                                                                                                                     |
| 34 | <b>H</b>                                       |                                                                                                                                                                     |
| 35 | Headache                                       | Any kind of pain in any region of the head.                                                                                                                         |
| 36 | Healthcare - actual                            | Healthcare that is related to specific sign/symptom-associated disease onsets or                                                                                    |
| 37 |                                                | disease onset dates.                                                                                                                                                |
| 38 | Healthcare - general                           | Healthcare that is unrelated to specific sign/symptom-associated disease onsets or                                                                                  |
| 39 |                                                | disease onset dates.                                                                                                                                                |
| 40 | Healthcare facility                            | Places or institutions where healthcare is provided; including hospitals, clinics,                                                                                  |
| 41 |                                                | healthcare centers, health posts, and specialized care centers.                                                                                                     |
| 42 | <i>Haemophilus</i><br><i>influenzae</i> type B | A bacterium that causes a range of illnesses and is spread by droplets through                                                                                      |
| 43 |                                                | coughs and sneezing, and occurs primarily among children <5years of age; common                                                                                     |
| 44 |                                                | signs are fever, headache, and stiff neck up to sepsis. It can cause ear infections,                                                                                |
| 45 |                                                | cellulitis (soft tissue infection), arthritis, upper respiratory infections, pneumonia,                                                                             |
| 46 |                                                | meningitis (potential brain damage) and epiglottitis (with airway obstructions).                                                                                    |
| 47 | Heart disorders                                | Any disorder that affects or is caused by the heart; conditions that involve                                                                                        |
| 48 |                                                | narrowed/blocked blood vessels that can lead to heart attack, chest pain, or stroke;                                                                                |
| 49 |                                                | condition that may affect one's heart muscle, valves, rhythm, or blood pressure.                                                                                    |
| 50 | Hepatitis B                                    | An infectious disease caused by the hepatitis B virus (HBV) that affects the liver                                                                                  |
| 51 |                                                | (acute/chronic liver infection; may result in liver failure, cancer, or cirrhosis). The                                                                             |
| 52 |                                                | virus is spread from person-to-person through blood, semen, or other bodily fluids.                                                                                 |
| 53 |                                                | Common symptoms are fever, malaise/weakness/fatigue, loss of appetite, nausea/<br>vomiting, abdominal discomfort/pain, dark-colored urine, joint pain and jaundice. |
| 54 | Hepatitis E                                    | An infectious disease caused by the hepatitis E virus (HEV) that affects the liver                                                                                  |
| 55 |                                                | (only acute liver infection; may result in acute liver failure). The virus is spread via                                                                            |
| 56 |                                                | the fecal-oral route through the ingestion of contaminated food and water, infected                                                                                 |
| 57 |                                                |                                                                                                                                                                     |
| 58 |                                                |                                                                                                                                                                     |
| 59 |                                                |                                                                                                                                                                     |
| 60 |                                                |                                                                                                                                                                     |



|                                    |                                                                                                                                                                                                                                                                                                                                                                                                                                                                                                                                                                                                                                                                                                                                                                     |
|------------------------------------|---------------------------------------------------------------------------------------------------------------------------------------------------------------------------------------------------------------------------------------------------------------------------------------------------------------------------------------------------------------------------------------------------------------------------------------------------------------------------------------------------------------------------------------------------------------------------------------------------------------------------------------------------------------------------------------------------------------------------------------------------------------------|
|                                    | animals (zoonotically) and blood. Common symptoms are fever, malaise, loss of appetite, diarrhea, nausea, abdominal discomfort, dark-colored urine, joint pain and jaundice.                                                                                                                                                                                                                                                                                                                                                                                                                                                                                                                                                                                        |
| HIV/AIDS                           | An infectious disease caused by the human immunodeficiency virus (HIV) that affects/damages the immune system and results in the acquired immunodeficiency syndrome (AIDS), a chronic, potentially life-threatening condition; it is transmitted through infectious body fluids such as blood, semen, and other bodily fluids. Common symptoms of an acute/early infection are fever, fatigue, headache, aches/joint pain, rash, sore throat, swollen glands/lymph nodes, diarrhea, weight loss, oral yeast infection and shingles. The untreated disease progresses to AIDS; symptoms caused by the severely damaged immune system are night sweats, recurring fever, chronic diarrhea, lesions on tongue and in the mouth, fatigue, weight loss, and skin rashes. |
| Household                          | A person or a group of related or unrelated persons that live together in the same dwelling unit, that acknowledge one male or female adult as the head of the household, that share the same housekeeping arrangements, that are considered to constitute one unit, and that provide themselves with food or other essentials for living. A household may be located in a single housing unit (single-story building) or in a set of collective living quarters (multi-story building).                                                                                                                                                                                                                                                                            |
| <b>I</b>                           |                                                                                                                                                                                                                                                                                                                                                                                                                                                                                                                                                                                                                                                                                                                                                                     |
| Income/Wage                        | Money or another form of payment that someone receives periodically in exchange for providing a good or service. It is usually received from a job/occupation.                                                                                                                                                                                                                                                                                                                                                                                                                                                                                                                                                                                                      |
| Influenza                          | An infectious, highly contagious disease of the respiratory tract that is caused by flu viruses; it is spread from person-to-person via infected saliva droplets and contaminated objects. Common symptoms are fever, aches in muscles/arms/legs, chills/sweats, headache, fatigue/weakness, runny nose/nasal congestion, sneezing, sore throat and dry persistent cough.                                                                                                                                                                                                                                                                                                                                                                                           |
| Intestinal pain/<br>Abdominal pain | Pain (acute/short-lived or chronic/long-lived) that occurs anywhere between the chest and the groin (often referred to as the stomach region/belly).                                                                                                                                                                                                                                                                                                                                                                                                                                                                                                                                                                                                                |
| <b>J</b>                           |                                                                                                                                                                                                                                                                                                                                                                                                                                                                                                                                                                                                                                                                                                                                                                     |
| Jaundice                           | A condition of yellowing of the skin/whites of the eyes.                                                                                                                                                                                                                                                                                                                                                                                                                                                                                                                                                                                                                                                                                                            |
| <b>K/L</b>                         |                                                                                                                                                                                                                                                                                                                                                                                                                                                                                                                                                                                                                                                                                                                                                                     |
| <b>M</b>                           |                                                                                                                                                                                                                                                                                                                                                                                                                                                                                                                                                                                                                                                                                                                                                                     |
| Malaise/Fatigue/<br>Weakness       | The state of feeling tired, exhausted, or weak; a general feeling of discomfort, uneasiness, unhealthiness, or unhappiness.                                                                                                                                                                                                                                                                                                                                                                                                                                                                                                                                                                                                                                         |
| Malaria                            | An infectious, sometimes fatal disease caused by a parasite ( <i>Plasmodium</i> spp.) that is transmitted primarily by the bite of infected mosquitoes; infection may also spread from mother-to-child prenatally or during delivery, or through contact with contaminated blood. Common symptoms are recurrent attacks of chills, sweating, high fever, headache, vomiting and diarrhea.                                                                                                                                                                                                                                                                                                                                                                           |
| Measles                            | An infectious, sometimes fatal disease of the respiratory tract (nose/throat) that is caused by a virus that affects mainly children <5years of age; it is spread from person-to-person via infected saliva droplets and contaminated objects. Common symptoms are fever, dry cough, runny nose, inflamed eyes, sore throat, large flat spots on the skin, and white spots in the mouth and on the cheek.                                                                                                                                                                                                                                                                                                                                                           |
| Meningitis                         | A viral/bacterial/fungal, sometimes life-threatening infectious inflammation of the membranes (meninges) surrounding the brain and spinal cord; it is spread from person-to-person via infected saliva droplets and contaminated objects. Common symptoms are high fever, severe headache, nausea/vomiting, confusion, seizures, loss of appetite and thirst, fatigues, sensitivity to light, skin rash and stiff neck.                                                                                                                                                                                                                                                                                                                                             |
| Mumps                              | A viral infectious disease caused by the mumps virus that affects mainly the parotid glands that are situated below and in front of the ears; it is spread from person-to-person via infected saliva droplets and contaminated objects. Common symptoms are fever, swelling of one/both parotid glands, headache, muscle aches, weakness/fatigue, loss of appetite and pain while chewing/swallowing; a known complication may be hearing loss.                                                                                                                                                                                                                                                                                                                     |

|                                         |                                                                                                                                                                                                                                                                                                                                                                                                                                                                                                                                                                                                                                                            |
|-----------------------------------------|------------------------------------------------------------------------------------------------------------------------------------------------------------------------------------------------------------------------------------------------------------------------------------------------------------------------------------------------------------------------------------------------------------------------------------------------------------------------------------------------------------------------------------------------------------------------------------------------------------------------------------------------------------|
| <b>N</b>                                |                                                                                                                                                                                                                                                                                                                                                                                                                                                                                                                                                                                                                                                            |
| Nausea/Vomiting                         | A feeling of sickness in the stomach with an inclination to vomit; a condition of ejecting part or all of the contents of the stomach, primarily through the mouth.                                                                                                                                                                                                                                                                                                                                                                                                                                                                                        |
| Neighbor                                | A person (related or unrelated) living next door to a household; a neighbor does not live together with members of a household (next door) in the same dwelling unit, does not share the same housekeeping arrangements, food, or other living essentials with members of a household (next door), and does not constitute one unit with members of a household (next door).                                                                                                                                                                                                                                                                               |
| <b>O</b>                                |                                                                                                                                                                                                                                                                                                                                                                                                                                                                                                                                                                                                                                                            |
| Occupation                              | A job, or means of earning a wage/living; often requires the mastery of a complex set of knowledge, tasks, duties and skills acquired through formal education and/or practical experience.                                                                                                                                                                                                                                                                                                                                                                                                                                                                |
| <b>P</b>                                |                                                                                                                                                                                                                                                                                                                                                                                                                                                                                                                                                                                                                                                            |
| Pain/Aches                              | A condition of having continuous/prolonged dull pain in a part of the body; the physical feeling, suffering, or discomfort caused by an illness or injury.                                                                                                                                                                                                                                                                                                                                                                                                                                                                                                 |
| Pertussis                               | Pertussis, also known as whooping cough, is a highly contagious bacterial disease. Symptoms similar to a common cold like runny nose, fever and cough are followed by weeks of severe coughing and a high-pitched whooping sound or gasping when a diseased person breathes in; severe coughing may even be followed by vomiting, breaking of ribs, or extreme fatigue. Infected very young and old people may have little or no cough, or they may have periods of interrupted breathing during which they do not breathe at all. Pertussis is transmitted by the bacterium <i>Bordetella pertussis</i> through coughs and sneezes of an infected person. |
| Pharmacy                                | A place where medicines (prescription or nonprescription) are prepared, preserved, compounded and dispensed.                                                                                                                                                                                                                                                                                                                                                                                                                                                                                                                                               |
| Physician                               | A person skilled/trained in healing; a person educated, clinically experienced, and licensed to practice medicine.                                                                                                                                                                                                                                                                                                                                                                                                                                                                                                                                         |
| Pneumococcus                            | A bacterial infection caused by the bacterium <i>Streptococcus pneumoniae</i> ; a sometimes fatal inflammation of the lungs that often affects immunocompromised people; it is spread from person-to-person via infected saliva droplets and contaminated objects. Common symptoms are fever, chills, cough (with phlegm/pus), chest pain, difficulty in breathing/shortness of breath, fatigue, nausea/vomiting and diarrhea; rare symptoms are sepsis, pleural effusion, and empyema.                                                                                                                                                                    |
| Polio                                   | A viral, highly contagious, sometimes fatal infectious disease caused by the poliovirus; in its most severe form causes paralysis and difficulties in breathing; it is transmitted via the fecal-oral route through ingestion of contaminated water and food, and from person-to-person contact. Common symptoms are fever, sore throat, headache, vomiting, fatigue, back pain/neck pain/stiffness, muscle weakness/aches, meningitis, loss of reflexes, and loose/floppy limbs.                                                                                                                                                                          |
| <b>Q</b>                                |                                                                                                                                                                                                                                                                                                                                                                                                                                                                                                                                                                                                                                                            |
| <b>R</b>                                |                                                                                                                                                                                                                                                                                                                                                                                                                                                                                                                                                                                                                                                            |
| Rapid breathing/<br>Shortness of breath | The condition of abnormally fast breathing; a rate of >20 breaths per minute for adults, >30 breaths per minute for children and >45 breaths per minute for babies.                                                                                                                                                                                                                                                                                                                                                                                                                                                                                        |
| Respondent                              | An adult (at the country-specific legal age of majority) household member who is a decision-maker for the entire household within the study site; thus, this adult person serves as a proxy for all household members. This person may be identified by other members of the same household as the person who is primarily involved in the daily healthcare of household members.                                                                                                                                                                                                                                                                          |
| Rotavirus                               | A viral infectious disease caused by rotavirus that results predominantly in diarrhea among children <5years of age; it spreads through the fecal-oral route from person-to-person contact and contaminated objects. Common symptoms are watery diarrhea, fever, vomiting, abdominal pain and dehydration.                                                                                                                                                                                                                                                                                                                                                 |
| Rubella                                 | A contagious, viral infectious disease caused by the rubella virus; known by its distinctive red rash; it is spread from person-to-person via infected saliva droplets), from mother-to-child prenatally via blood, and contaminated objects. Common                                                                                                                                                                                                                                                                                                                                                                                                       |

|                                                   |                                                                                                                                                                                                                                                                                                                                                                                                                                                                                                                                                                                                                                                                                                                                                                                                                                                |
|---------------------------------------------------|------------------------------------------------------------------------------------------------------------------------------------------------------------------------------------------------------------------------------------------------------------------------------------------------------------------------------------------------------------------------------------------------------------------------------------------------------------------------------------------------------------------------------------------------------------------------------------------------------------------------------------------------------------------------------------------------------------------------------------------------------------------------------------------------------------------------------------------------|
|                                                   | symptoms are mild fever, headache, stuffy/runny nose, inflamed red eyes, enlarged tender lymph nodes at the base of the skull/back of the neck/behind the ears, joint pain and a fine pink rash that moves from the face to the trunk, arms and legs.                                                                                                                                                                                                                                                                                                                                                                                                                                                                                                                                                                                          |
| Runny nose                                        | The condition when the nose (nasal and adjacent tissues and blood vessels) produces extra mucus/excess drainage.                                                                                                                                                                                                                                                                                                                                                                                                                                                                                                                                                                                                                                                                                                                               |
| <b>S</b>                                          |                                                                                                                                                                                                                                                                                                                                                                                                                                                                                                                                                                                                                                                                                                                                                                                                                                                |
| Self-treatment                                    | The medication of oneself or treatment of one's own disease or condition without medical supervision or prescription.                                                                                                                                                                                                                                                                                                                                                                                                                                                                                                                                                                                                                                                                                                                          |
| Severe breathing/<br>Difficulties in<br>breathing | The condition of abnormal breathing that may be accompanied by wheezing, chest pain, chest in-drawing, stridor, swelling in the chest, or cough for instance.                                                                                                                                                                                                                                                                                                                                                                                                                                                                                                                                                                                                                                                                                  |
| Shivering/Chills                                  | The sensation of coldness that could be accompanied by shivering or shaking of the body and pallor of the skin.                                                                                                                                                                                                                                                                                                                                                                                                                                                                                                                                                                                                                                                                                                                                |
| Shortness of breath/<br>Rapid breathing           | The condition of abnormally fast and deep breathing; a rate of >20 breaths per minute for adults, >30 breaths per minute for children and >45 breaths per minute for babies.                                                                                                                                                                                                                                                                                                                                                                                                                                                                                                                                                                                                                                                                   |
| Sneezing                                          | The condition of suddenly forcing air out through nose and mouth with a usual loud noise.                                                                                                                                                                                                                                                                                                                                                                                                                                                                                                                                                                                                                                                                                                                                                      |
| Swelling/Edema                                    | A condition of an excess collection of a watery fluid/swelling in the cavities or tissues of the body; it's commonly noticed in the hands/arms/feet/legs; volume increase of tissue.                                                                                                                                                                                                                                                                                                                                                                                                                                                                                                                                                                                                                                                           |
| <b>T</b>                                          |                                                                                                                                                                                                                                                                                                                                                                                                                                                                                                                                                                                                                                                                                                                                                                                                                                                |
| Tetanus                                           | Tetanus is an infection characterized by muscle spasms which commonly begins in the jaw and progresses to the rest of the body. The spasms usually last for a few minutes only and occur frequently during 3-4 weeks of the illness but can be so severe that they may cause bone fractures or death when they affect the respiratory muscles. Tetanus may be characterized by further symptoms like fever, sweating, headache, difficulties in swallowing, high blood pressure, and an increased heart rate. The disease is caused by an infection with the bacterium <i>Clostridium tetani</i> that is found in soil, saliva, dust and manure. The bacterium enters through a skin injury (e.g. cut, puncture wound) by a contaminated object. It produces toxins that interfere with muscle contractions that result in the typical spasms. |
| Traditional healer                                | A person that aims to maintain health as well as to prevent, diagnose, and improve or treat illnesses by using a sum of knowledge, skills and practices based on theories, beliefs and experiences.                                                                                                                                                                                                                                                                                                                                                                                                                                                                                                                                                                                                                                            |
| Tuberculosis                                      | A contagious, potentially serious infectious disease caused by the bacteria <i>Mycobacterium tuberculosis</i> ; primarily affects the lungs, but can also affect the kidneys and spine/brain; it is transmitted from person-to-person via infected saliva droplets. Common symptoms of active tuberculosis are cough (with or without blood), chest pain, weight loss, fatigue, fever, night sweats, chills and loss of appetite.                                                                                                                                                                                                                                                                                                                                                                                                              |
| Typhoid fever                                     | A bacterial, potentially life-threatening infectious disease caused by <i>Salmonella typhi</i> ; it is transmitted via the fecal-oral route through contaminated food and water, or from person-to-person contact. Common symptoms are high fever, headache, abdominal pain, constipation/diarrhea, and rash. Serious complications (i.e. perforation of the gut) are reported.                                                                                                                                                                                                                                                                                                                                                                                                                                                                |
| <b>U</b>                                          |                                                                                                                                                                                                                                                                                                                                                                                                                                                                                                                                                                                                                                                                                                                                                                                                                                                |
| Unconsciousness/<br>Dizziness/Confusion           | The state of being bewildered or unclear in mind; an abnormal state of response to stimuli in the environment; faint, wooziness, weakness, unsteadiness or a tendency to fall; the interruption of the awareness of oneself and one's surroundings.                                                                                                                                                                                                                                                                                                                                                                                                                                                                                                                                                                                            |
| <b>V</b>                                          |                                                                                                                                                                                                                                                                                                                                                                                                                                                                                                                                                                                                                                                                                                                                                                                                                                                |
| Varicella                                         | A viral, highly contagious infectious disease, commonly known as chickenpox, that primarily affects children and is caused by the varicella-zoster virus; it is spread from person-to-person by contact with infected blisters or saliva droplets. Common symptoms are mild fever, headache, backache, loss of appetite, and vesicular skin eruptions/rash/red spots on the back and chest accompanied by severe itching.                                                                                                                                                                                                                                                                                                                                                                                                                      |

|                                                                                                                                                                                                                                                          |                              |                                                                                                                                                                                                                                                                                                                                                                                                                              |
|----------------------------------------------------------------------------------------------------------------------------------------------------------------------------------------------------------------------------------------------------------|------------------------------|------------------------------------------------------------------------------------------------------------------------------------------------------------------------------------------------------------------------------------------------------------------------------------------------------------------------------------------------------------------------------------------------------------------------------|
| 1<br>2<br>3<br>4<br>5                                                                                                                                                                                                                                    | Visitor                      | A person (related or unrelated) who comes to a household to spend some time with household members; a visitor does not live together with household members in the same dwelling unit, does not share the same housekeeping arrangements, food, or other living essentials with household members, and does not constitute one unit with household members.                                                                  |
| 6<br>7<br>8                                                                                                                                                                                                                                              | Vomiting/Nausea              | A feeling of sickness in the stomach with an inclination to vomit; a condition of ejecting part or all of the contents of the stomach, primarily through the mouth.                                                                                                                                                                                                                                                          |
| 9                                                                                                                                                                                                                                                        | <b>W</b>                     |                                                                                                                                                                                                                                                                                                                                                                                                                              |
| 10<br>11                                                                                                                                                                                                                                                 | Weakness/Malaise/<br>Fatigue | The state of feeling tired, exhausted, or weak; a general feeling of discomfort, uneasiness, unhealthiness, or unhappiness.                                                                                                                                                                                                                                                                                                  |
| 12                                                                                                                                                                                                                                                       | Weight loss                  | The (voluntary or involuntary) decrease in body weight.                                                                                                                                                                                                                                                                                                                                                                      |
| 13<br>14<br>15<br>16<br>17                                                                                                                                                                                                                               | Witness                      | A person who is an adult (at the country-specific legal age of majority), who is independent of the study, who cannot be unfairly influenced by study staff, who attends the informed consent process if the subject or subject's legally acceptable representative is illiterate, and who reads (literate) the informed consent form and any other written information supplied to the subject.                             |
| 18                                                                                                                                                                                                                                                       | <b>X/Y/Z</b>                 |                                                                                                                                                                                                                                                                                                                                                                                                                              |
| 19<br>20<br>21<br>22<br>23<br>24<br>25<br>26<br>27<br>28<br>29<br>30<br>31<br>32<br>33<br>34<br>35<br>36<br>37<br>38<br>39<br>40<br>41<br>42<br>43<br>44<br>45<br>46<br>47<br>48<br>49<br>50<br>51<br>52<br>53<br>54<br>55<br>56<br>57<br>58<br>59<br>60 | Yellow fever                 | An acute infectious, human pathogenic, viral disease that is marked by the sudden onset of symptoms like fever, chills, loss of appetite, nausea, muscle pain, and headache, that typically resolve within a few days or are followed by more serious symptoms such as jaundice, high fever and hemorrhage. The disease is caused by a virus of the genus Flavivirus and is transmitted by the bite of an infected mosquito. |

STROBE Statement—Checklist of items that should be included in reports of *cross-sectional studies*

|                              | Item No | Recommendation                                                                                                                                                                       |     |
|------------------------------|---------|--------------------------------------------------------------------------------------------------------------------------------------------------------------------------------------|-----|
| <b>Title and abstract</b>    | 1       | (a) Indicate the study's design with a commonly used term in the title or the abstract                                                                                               | √   |
|                              |         | (b) Provide in the abstract an informative and balanced summary of what was done and what was found                                                                                  | √   |
| <b>Introduction</b>          |         |                                                                                                                                                                                      |     |
| Background/rationale         | 2       | Explain the scientific background and rationale for the investigation being reported                                                                                                 | √   |
| Objectives                   | 3       | State specific objectives, including any prespecified hypotheses                                                                                                                     | √   |
| <b>Methods</b>               |         |                                                                                                                                                                                      |     |
| Study design                 | 4       | Present key elements of study design early in the paper                                                                                                                              | √   |
| Setting                      | 5       | Describe the setting, locations, and relevant dates, including periods of recruitment, exposure, follow-up, and data collection                                                      | √   |
| Participants                 | 6       | (a) Give the eligibility criteria, and the sources and methods of selection of participants                                                                                          | √   |
| Variables                    | 7       | Clearly define all outcomes, exposures, predictors, potential confounders, and effect modifiers. Give diagnostic criteria, if applicable                                             | √   |
| Data sources/<br>measurement | 8*      | For each variable of interest, give sources of data and details of methods of assessment (measurement). Describe comparability of assessment methods if there is more than one group | √   |
| Bias                         | 9       | Describe any efforts to address potential sources of bias                                                                                                                            | √   |
| Study size                   | 10      | Explain how the study size was arrived at                                                                                                                                            | √   |
| Quantitative variables       | 11      | Explain how quantitative variables were handled in the analyses. If applicable, describe which groupings were chosen and why                                                         | √   |
| Statistical methods          | 12      | (a) Describe all statistical methods, including those used to control for confounding                                                                                                | √   |
|                              |         | (b) Describe any methods used to examine subgroups and interactions                                                                                                                  | √   |
|                              |         | (c) Explain how missing data were addressed                                                                                                                                          | Not |

applicable

(d) If applicable, describe analytical methods taking account of sampling strategy

Not applicable

(e) Describe any sensitivity analyses

Not applicable

**Results**

|                  |     |                                                                                                                                                                                                              |                |
|------------------|-----|--------------------------------------------------------------------------------------------------------------------------------------------------------------------------------------------------------------|----------------|
| Participants     | 13* | (a) Report numbers of individuals at each stage of study—eg numbers potentially eligible, examined for eligibility, confirmed eligible, included in the study, completing follow-up, and analysed            | Not applicable |
|                  |     | (b) Give reasons for non-participation at each stage                                                                                                                                                         | Not applicable |
|                  |     | (c) Consider use of a flow diagram                                                                                                                                                                           | Not applicable |
| Descriptive data | 14* | (a) Give characteristics of study participants (eg demographic, clinical, social) and information on exposures and potential confounders                                                                     | Not applicable |
|                  |     | (b) Indicate number of participants with missing data for each variable of interest                                                                                                                          | Not applicable |
| Outcome data     | 15* | Report numbers of outcome events or summary measures                                                                                                                                                         | Not applicable |
| Main results     | 16  | (a) Give unadjusted estimates and, if applicable, confounder-adjusted estimates and their precision (eg, 95% confidence interval). Make clear which confounders were adjusted for and why they were included | Not applicable |
|                  |     | (b) Report category boundaries when continuous variables were categorized                                                                                                                                    | Not applicable |
|                  |     | (c) If relevant, consider translating estimates of relative risk into absolute risk for a meaningful time period                                                                                             | Not applicable |
| Other analyses   | 17  | Report other analyses done—eg analyses of subgroups and interactions, and sensitivity analyses                                                                                                               | Not applicable |

1  
2  
3  
4  
5  
6  
7  
8  
9  
10  
11  
12  
13  
14  
15  
16  
17  
18  
19  
20  
21  
22  
23  
24  
25  
26  
27  
28  
29  
30  
31  
32  
33  
34  
35  
36  
37  
38  
39  
40  
41  
42  
43  
44  
45  
46  
47

---

| <b>Discussion</b>        |    |                                                                                                                                                                            |                |
|--------------------------|----|----------------------------------------------------------------------------------------------------------------------------------------------------------------------------|----------------|
| Key results              | 18 | Summarise key results with reference to study objectives                                                                                                                   | Not applicable |
| Limitations              | 19 | Discuss limitations of the study, taking into account sources of potential bias or imprecision. Discuss both direction and magnitude of any potential bias                 | Not applicable |
| Interpretation           | 20 | Give a cautious overall interpretation of results considering objectives, limitations, multiplicity of analyses, results from similar studies, and other relevant evidence | Not applicable |
| Generalisability         | 21 | Discuss the generalisability (external validity) of the study results                                                                                                      | Not applicable |
| <b>Other information</b> |    |                                                                                                                                                                            |                |
| Funding                  | 22 | Give the source of funding and the role of the funders for the present study and, if applicable, for the original study on which the present article is based              | ✓              |

---

Site \_\_\_\_ Subarea \_\_\_\_ House number \_\_\_\_

Interviewer ID \_\_\_\_

**Appendix 2/Supplementary file 2: Study forms (English)****FORM 1 – RECORD OF HOUSEHOLD VISITS****Instructions to the interviewer**

- Complete "Form 1 – RECORD OF HOUSEHOLD VISITS" for every household visited.
- Complete "Home/Respondent/Completed" once all survey parts have been completed; if not all data have been collected at the initial and/or a consecutive visit (max. 3 visits), schedule a revisit.
- **Attempt 1:** complete the status of the household visit using given options; for "Not Home", "Home/Non-Respondent" and "Home/Respondent/Unavailable" schedule a revisit; for "Home/Respondent/Refusal" state the reason for refusal and visit a replacement household to the nearest on the right or left side of this household; for ~~and~~ "Non-existing/Non-residential" skip this household and visit a replacement household to the nearest on the right or left side of this household instead.
- **Attempt 2:** complete the status of the household visit using given options; for "Not Home", "Home/Non-Respondent" and "Home/Respondent/Unavailable" schedule a revisit.
- **Attempt 3:** complete the status of the household visit using given options; for "Not Home", "Home/Non-Respondent", "Home/Respondent/Unavailable" skip this household and visit a replacement household to the nearest on the right or left side of this household instead.
- "Site" and "Subarea" must be entered each as a 3-digit, "House number" as a 4-digit, and "Interviewer ID" as a 2-digit code (use lists individually prepared for each site to obtain codes); enter "Date" in the format DD/MM/YY and "Time" in the format HH:MM and circle AM or PM. "Study label" must be a combination of a 3-digit "Site" code, a 3-digit "Subarea" code and a 4-digit "House number" code; the "Interviewer ID" must be entered as a 3-digit code.

|                                |                                   |                                                                                                                                                                                                                                                                                                                                                                                                |                     |
|--------------------------------|-----------------------------------|------------------------------------------------------------------------------------------------------------------------------------------------------------------------------------------------------------------------------------------------------------------------------------------------------------------------------------------------------------------------------------------------|---------------------|
| <b>Attempt 1</b>               | Date ____/____/____<br>(DD/MM/YY) | Time ____/____<br>AM/PM                                                                                                                                                                                                                                                                                                                                                                        | Interviewer ID ____ |
| STATUS                         |                                   | Tick one                                                                                                                                                                                                                                                                                                                                                                                       |                     |
| 1=Not home                     | <input type="radio"/>             | ➔ Schedule revisit (Date/Time)                                                                                                                                                                                                                                                                                                                                                                 |                     |
| 2=Home/Non-Respondent          | <input type="radio"/>             | ➔ Schedule revisit (Date/Time)                                                                                                                                                                                                                                                                                                                                                                 |                     |
| 3=Home/Respondent/Unavailable  | <input type="radio"/>             | ➔ Schedule revisit (Date/Time)                                                                                                                                                                                                                                                                                                                                                                 |                     |
| 4=Home/Respondent/Completed    | <input type="radio"/>             |                                                                                                                                                                                                                                                                                                                                                                                                |                     |
| 5=Home/Respondent/Refusal      | <input type="radio"/>             | Record the reason(s) for refusal; tick all that applies<br><input type="radio"/> 1=No time to answer questions<br><input type="radio"/> 2=Don't want to participate/answer questions<br><input type="radio"/> 3=Other _____<br><input type="radio"/> 98=No response <input type="radio"/> 99=Don't know<br>➔ Visit a replacement household to the nearest right or left side of this household |                     |
| 6=Non-existing/Non-residential | <input type="radio"/>             | ➔ Visit a replacement household to the nearest right or left side of this household                                                                                                                                                                                                                                                                                                            |                     |
| <b>Attempt 2</b>               | Date ____/____/____<br>(DD/MM/YY) | Time ____/____<br>AM/PM                                                                                                                                                                                                                                                                                                                                                                        | Interviewer ID ____ |
| STATUS                         |                                   | Tick one                                                                                                                                                                                                                                                                                                                                                                                       |                     |
| 1=Not home                     | <input type="radio"/>             | ➔ Schedule revisit (Date/Time)                                                                                                                                                                                                                                                                                                                                                                 |                     |
| 2=Home/Non-Respondent          | <input type="radio"/>             | ➔ Schedule revisit (Date/Time)                                                                                                                                                                                                                                                                                                                                                                 |                     |
| 3=Home/Respondent/Unavailable  | <input type="radio"/>             | ➔ Schedule revisit (Date/Time)                                                                                                                                                                                                                                                                                                                                                                 |                     |



Site \_\_\_\_\_ Subarea \_\_\_\_\_ House number \_\_\_\_\_

Interviewer ID \_\_\_\_\_

|                                |                                   |                         |                                                                                                                                                                                                                                                                                                                                                                                                |
|--------------------------------|-----------------------------------|-------------------------|------------------------------------------------------------------------------------------------------------------------------------------------------------------------------------------------------------------------------------------------------------------------------------------------------------------------------------------------------------------------------------------------|
| 4=Home/Respondent/Completed    |                                   | <input type="radio"/>   |                                                                                                                                                                                                                                                                                                                                                                                                |
| 5=Home/Respondent/Refusal      |                                   | <input type="radio"/>   | Record the reason(s) for refusal; tick all that applies<br><input type="radio"/> 1=No time to answer questions<br><input type="radio"/> 2=Don't want to participate/answer questions<br><input type="radio"/> 3=Other _____<br><input type="radio"/> 98=No response <input type="radio"/> 99=Don't know<br>➔ Visit a replacement household to the nearest right or left side of this household |
| 6=Non-existing/Non-residential |                                   | <input type="radio"/>   | ➔ Visit a replacement household to the nearest right or left side of this household                                                                                                                                                                                                                                                                                                            |
| <b>Attempt 3</b>               | Date ____/____/____<br>(DD/MM/YY) | Time ____/____<br>AM/PM | Interviewer ID ____                                                                                                                                                                                                                                                                                                                                                                            |
| STATUS                         |                                   | Tick one                |                                                                                                                                                                                                                                                                                                                                                                                                |
| 1=Not home                     |                                   | <input type="radio"/>   | ➔ Visit a replacement household to the nearest right or left side of this household                                                                                                                                                                                                                                                                                                            |
| 2=Home/Non-Respondent          |                                   | <input type="radio"/>   | ➔ Visit a replacement household to the nearest right or left side of this household                                                                                                                                                                                                                                                                                                            |
| 3=Home/Respondent/Unavailable  |                                   | <input type="radio"/>   | ➔ Visit a replacement household to the nearest right or left side of this household                                                                                                                                                                                                                                                                                                            |
| 4=Home/Respondent/Completed    |                                   | <input type="radio"/>   |                                                                                                                                                                                                                                                                                                                                                                                                |
| 5=Home/Respondent/Refusal      |                                   | <input type="radio"/>   | Record the reason(s) for refusal; tick all that applies<br><input type="radio"/> 1=No time to answer questions<br><input type="radio"/> 2=Don't want to participate/answer questions<br><input type="radio"/> 3=Other _____<br><input type="radio"/> 98=No response <input type="radio"/> 99=Don't know<br>➔ Visit a replacement household to the nearest right or left side of this household |
| 6=Non-existing/Non-residential |                                   | <input type="radio"/>   | ➔ Visit a replacement household to the nearest right or left side of this household                                                                                                                                                                                                                                                                                                            |

Site \_\_\_\_ Subarea \_\_\_\_ House number \_\_\_\_

Interviewer ID \_\_\_\_

## FORM 2 – CONSENT FORM

Healthcare assessment in [add study site and -country]

### Instructions to the interviewer

- Read "Form 2 – CONSENT FORM" to the respondent/ask the respondent to carefully read through "Form 2 – CONSENT FORM" if preferred.
- The respondent as defined for this investigation is an adult (at the country-specific legal age of majority) household member and decision-maker with respect to daily healthcare/healthcare utilization for the entire household and its members; it must not be e.g. a neighbour or a visitor.
- Assure that the respondent has fully understood the purpose, procedures, risks and benefits of this study prior to obtaining the respondent's consent to participate.
- The respondent must sign "Form 2 – CONSENT FORM"; if the respondent is unable to sign/illiterate, a thumbprint will serve in place of a signature and a study-independent literate adult witness (e.g. member of same household/neighbour) will sign "Form 2 – CONSENT FORM".
- Collect data about all household members regardless of whether all household members are present at the time of the interview; collecting and recording data only about individuals present at the time of the interview will result in biased data.
- Complete "Form 2 – CONSENT FORM" once for every household consented/enrolled in the study.
- Explain to the respondent that it is anticipated to revisit every household during a 2-year period; the study team will obtain a new consent for participation during each visit.
- "Site" and "Subarea" must be entered each as a 3-digit, "House number" as a 4-digit, "Interviewer ID" as a 2-digit code (use lists individually prepared for each site to obtain codes), and "Date" in the format DD/MM/YYYY. "Study label" must be a combination of a 3-digit "Site" code, a 3-digit "Subarea" code and a 4-digit "House number" code; the "Interviewer ID" must be entered as a 3-digit code.

### Study principal- and co-investigators

[add names of study principal- and co-investigators and respective affiliations]

### Introduction

The International Vaccine Institute (IVI) and the [add affiliation(s) of local investigators] are working together to look into health problems and healthcare seeking behaviour in your community [add study site and -country], including the socio-economic status, hygiene and sanitation behaviour, and the vaccination status among children. We would like to better understand where you, your family and your neighbours seek healthcare in case of medical conditions associated with fever/hot body and other signs & symptoms. This information will help us to find out how common fever-related and other conditions are, provide a better picture of influencing factors involved in disease transmission and infection, and to find ways to prevent and treat illnesses in your community. You, the primary decision-maker for daily healthcare/healthcare utilization for this household and its members, are invited to participate because you live in the area where we are conducting this study. This consent form will be read by you/to you and you should take your time to make your decision to accept or decline the participation in the study. Please ask members of the study team to explain any word(s) or information that you do not understand. Further information about this study, including its potential risks, benefits and inconveniences will be explained subsequently. After the study has been fully explained to you and if you agree to participate, you will be asked to sign this consent form on behalf of all household members. If you are unable to sign the form, we will ask you to provide your thumbprint, and a study-independent adult person (member of your household/neighbour) will sign the form as a witness. We will give you a signed and dated copy of the consent form.

### Purpose

The purpose of this study is to look into health problems and utilization of healthcare in your community [add study site and -country], including the socio-economic status and hygiene and sanitation behaviour. We aim to better understand where you, your family and your neighbours seek healthcare for conditions associated with fever/hot body or other signs & symptoms. This information will help better estimate the burden of illnesses common in your community, and to identify ways to introduce measures to prevent and treat them.

Site \_\_\_\_\_ Subarea \_\_\_\_\_ House number \_\_\_\_\_

Interviewer ID \_\_\_\_\_

### Procedures

We will visit about [add number for study site and -country] households in total in [add study site and -country] and will ask the same questions to each household. Your household was chosen for this study simply by chance. If you agree to participate, we will ask you on behalf of all household members a few questions about your household such as the initials, sex and age of each member. We would like to know some information related to the education and occupation of the household head, and income, possession of household items, the housing itself as well as hygiene and sanitation in the context of personal hygiene, food preparation and handling, water sources and handling, waste disposal, handling of farm and domestic animals as well as farming of this household. We will also ask where members of your household get help if anyone is sick due to fever-related and other conditions and about factors that may influence healthcare seeking behaviour of household members (i.e. travel modalities, availability of health insurance, cultural/ethnographic factors) besides the immunization status of children of this house and the perception of some diseases. Finally, we will measure the geographic location of your house. There are no right or wrong answers. You are free to choose which questions to answer. All in all, it should take about 30-45 minutes to answer all questions. The interview may take a bit longer if there are many members in this household. Also, we will visit your household two times in different seasons (once during the dry season and once towards the end of the rainy season) during the overall study period of about two years to collect data as described in this paragraph of the consent form.

### Participation

You, the primary decision-maker for daily healthcare/healthcare utilization for this household and its members, and members of your household are free to choose to accept or decline to be part of the study. If you do not want to participate, that is ok. If you want to stop your participation at any time, that is ok, and there will be no harm to you or members of your household. So, participation in this study is voluntary, and you are free to refuse to participate in the study or you can withdraw your consent at any time without giving reasons and this will not involve any penalty.

### Risks & Benefits

There are no direct risks for participating in this study. Asking questions about your household may make you or household members feel uncomfortable. Study teams may help providing information on established community healthcare resources for participants that express distress after completing the questions. You can refuse to answer any question at any time. You may take a break or stop participating in this study at any time. There are no direct benefits for being in this study. During visits of your household, our study teams may identify members of your household that should seek healthcare for fever-associated conditions and others. Hence, they may help providing information on established healthcare resources in your community. Indirect benefits are that all information collected will provide exact information on health problems and healthcare utilization for various conditions, including vaccination for young children, the socio-economic status as well as hygiene and sanitation behaviour in your community. This will help to provide a better picture of influencing factors involved in disease transmission and infection, and to estimate the burden of common diseases as well as to find ways to prevent and treat those in your community.

### Costs & Compensation

There are no costs for participants of this study. You and anyone from your household will not be compensated for your participation.

### Confidentiality

All study records and all collected information that identify you and members of your household will be kept confidential. All paper-based files will be locked safely and computerized files will be password-protected; all data files (paper-based/computerized) will be stored for a minimum of five years; these files will be accessible to authorized few study staff only. Your name or any identifier will not be used in any publication or reports from this study. Information that we collect about you and members of your household will only be shared with authorized study members such as authorized study staff and officials from ethics committees.

Site \_\_\_\_\_ Subarea \_\_\_\_\_ House number \_\_\_\_\_

Interviewer ID \_\_\_\_\_

**Contact point for questions**

If you or members of your household have any questions, please ask them now to the study team or at any time later by contacting [add name of local principal- and/or co-investigator, respective affiliations, and phone numbers]. If you have questions as a study participant about your/your household members' rights, you can contact the [add name and contact details of the local ethics committee].

**Statement of consent**

This consent form for participating in the assessment of health behaviour and other population-based factors in [add study site and -country] has been read by me/to me carefully. The purpose, procedures, risks & benefits have been explained to me in detail. I have been allowed to ask questions at any time, and my questions have been answered to my satisfaction by the study team. I have been told whom to contact if I have questions, want to discuss problems or concerns. I have been told that I will be given a signed and dated copy of this consent form. I have been reassured that all information obtained as result of this study will be kept confidential and used only for the purpose of this study and only by participating institutions.

I, the respondent, consent hereby voluntarily to participate in this study. I will follow the directions of the study team and give them my full cooperation. I understand that I have the right to withdraw from the study at any time.

**RESPONDENT**

Name: \_\_\_\_\_  
(given name + middle name (if available) + family name)

Signature: \_\_\_\_\_  
(handwritten depiction of person's name/mark that the person writes on a document as a proof of identity)

Date \_\_\_\_/\_\_\_\_/\_\_\_\_ (DD/MM/YYYY)

Thumbprint

If the respondent is unable to sign/illiterate but agrees to participate, record the respondent's thumb print in the above box, and have an adult study-independent literate witness (e.g. member of the same household or a neighbor) sign below:

**WITNESS**

Name: \_\_\_\_\_  
(given name + middle name (if available) + family name)

Signature: \_\_\_\_\_  
(handwritten depiction of person's name/mark that the person writes on a document as a proof of identity)

Date \_\_\_\_/\_\_\_\_/\_\_\_\_ (DD/MM/YYYY)

I, the interviewer, have read/explained the study to the above named respondent (witness if respondent is illiterate) in a language that the respondent understands well. I am certain that the respondent has understood the information and he/she agrees to be asked some questions.

**INTERVIEWER**

Name: \_\_\_\_\_  
(given name + middle name (if available) + family name)

Signature: \_\_\_\_\_  
(handwritten depiction of person's name/mark that the person writes on a document as a proof of identity)

Date \_\_\_\_/\_\_\_\_/\_\_\_\_ (DD/MM/YYYY)

Site \_\_\_\_\_ Subarea \_\_\_\_\_ House number \_\_\_\_\_ Interviewer ID \_\_\_\_\_

### FORM 3: GENERAL HOUSEHOLD INFORMATION

#### Instructions to the interviewer

- Complete this form only if the respondent consented to participate (see "Form 2 – CONSENT FORM"); the respondent as defined for this investigation is an adult (at the country-specific legal age of majority) household member and decision-maker with respect to daily healthcare/healthcare utilization for the entire household and its members; it must not be e.g. a neighbour or a visitor.
- Collect data about all household members regardless of whether all household members are present at the time of the interview; collecting and recording data only about individuals present at the time of the interview will result in biased data.
- A household is/household members are defined as a person or a group of related or unrelated persons that live together in the same dwelling unit, that acknowledge one male or female adult as the head of the household, that share the same housekeeping arrangements, that are considered to constitute one unit, and that provide themselves with food or other essentials for living.
- "Site" and "Subarea" must be entered each as a 3-digit, "House number" as a 4-digit, and "Interviewer ID" as a 2-digit code (use lists individually prepared for each site to obtain codes). "Study label" must be a combination of a 3-digit "Site" code, a 3-digit "Subarea" code and a 4-digit "House number" code; the "Interviewer ID" must be entered as a 3-digit code.

### FORM 3: GENERAL HOUSEHOLD INFORMATION PART A – DEMOGRAPHIC DATA/GENERAL HOUSEHOLD INFORMATION

#### HOUSE LOCATION

#### 1 Site, subarea and house number

*Instructions:* Site (=study site) and subarea (=smallest unit of the study site) must be recorded each as a 3-digit, and house number as a 4-digit code; use individually prepared lists to obtain the respective codes.

Site: \_\_\_\_\_ Subarea: \_\_\_\_\_ House number: \_\_\_\_\_

#### 2 GPS coordinates

*Instructions:* Take GPS coordinates at the approx. center of the house. Record altitude as a 4-digit number (unit: meter), and latitude/longitude as a 7-digit number (unit: degrees, decimal minutes).

1=Original household  2=Replacement household (right/left side of original household)

Altitude: \_\_\_\_\_

Latitude: \_\_\_\_\_° \_\_\_\_\_' \_\_\_\_\_" Longitude: \_\_\_\_\_° \_\_\_\_\_' \_\_\_\_\_"

#### RESPONDENT

#### 3 Provide the full name of the respondent.

*Instructions:* Record given name, middle name (if available) and family name of the respondent.

#### 4 Provide the age of the respondent.

*Instruction:* Recorded as a 3-digit number (unit: year). \_\_\_\_\_

#### 5 Provide the sex of the respondent.

1=Male  2=Female

#### 6 What is the respondent's relationship to this household?

- |                                                                  |                                                                    |
|------------------------------------------------------------------|--------------------------------------------------------------------|
| <input type="radio"/> 1=Household head                           | <input type="radio"/> 7=Spouse of household head                   |
| <input type="radio"/> 2=Son/daughter of household head           | <input type="radio"/> 8=Spouse of son/daughter of household head   |
| <input type="radio"/> 3=Brother/sister of household head         | <input type="radio"/> 9=Spouse of brother/sister of household head |
| <input type="radio"/> 4=Mother/father of household head          | <input type="radio"/> 10=Mother/father in law of household head    |
| <input type="radio"/> 5=Granddaughter/grandson of household head | <input type="radio"/> 11=Niece/nephew of household head            |
| <input type="radio"/> 6=Other, specify _____                     | <input type="radio"/> 98=No response                               |

Site \_\_\_\_\_ Subarea \_\_\_\_\_ House number \_\_\_\_\_

Interviewer ID \_\_\_\_\_

**HOUSEHOLD MEMBERS**

**7 How many household members are living in this house in total (at the day of visit)?**

*Instruction:* Recorded as a 2-digit number.

Total number of household members: \_\_\_\_\_

**8 Record age and sex of each household member.**

*Instructions:* Record the respondent's initials, age and sex at the first position/row of the table. Initials, age and sex of all other household members must be recorded subsequently. The initials of a household member consist of the first three letters of the given name and the first three letters of the family name (a potential middle name is not part of the initials). Record the age of each household member as a 3-digit number (unit: year); if a household member's age is ≤12 months, record the age as 1 year. Please complete an additional form if a household has >20 members.

| Household member identifier | Initials<br>[given name/family name] | Age<br>[year] | Sex               |
|-----------------------------|--------------------------------------|---------------|-------------------|
| 1/Respondent                | _____/____                           | ____          | O1=Male O2=Female |
| 2                           | _____/____                           | ____          | O1=Male O2=Female |
| 3                           | _____/____                           | ____          | O1=Male O2=Female |
| 4                           | _____/____                           | ____          | O1=Male O2=Female |
| 5                           | _____/____                           | ____          | O1=Male O2=Female |
| 6                           | _____/____                           | ____          | O1=Male O2=Female |
| 7                           | _____/____                           | ____          | O1=Male O2=Female |
| 8                           | _____/____                           | ____          | O1=Male O2=Female |
| 9                           | _____/____                           | ____          | O1=Male O2=Female |
| 10                          | _____/____                           | ____          | O1=Male O2=Female |
| 11                          | _____/____                           | ____          | O1=Male O2=Female |
| 12                          | _____/____                           | ____          | O1=Male O2=Female |
| 13                          | _____/____                           | ____          | O1=Male O2=Female |
| 14                          | _____/____                           | ____          | O1=Male O2=Female |
| 15                          | _____/____                           | ____          | O1=Male O2=Female |
| 16                          | _____/____                           | ____          | O1=Male O2=Female |
| 17                          | _____/____                           | ____          | O1=Male O2=Female |
| 18                          | _____/____                           | ____          | O1=Male O2=Female |
| 19                          | _____/____                           | ____          | O1=Male O2=Female |
| 20                          | _____/____                           | ____          | O1=Male O2=Female |

Site \_\_\_\_\_ Subarea \_\_\_\_\_ House number \_\_\_\_\_

Interviewer ID \_\_\_\_\_

**FORM 3: GENERAL HOUSEHOLD INFORMATION  
PART B – SOCIO-ECONOMIC DATA**

**EDUCATION**

- 1 Can the head of household read in [add the official language of the study site/country]?**  
 1=Yes       2=No       99=Don't know       98=No response
- 2 Can the head of household write in [add the official language of the study site/country]?**  
 1=Yes       2=No       99=Don't know       98=No response
- 3 What is the highest completed level of formal school education of the head of household?**  
 1=Primary school       4=Higher than secondary school       99=Don't know  
 2=Middle school       5=NO EDUCATION       98=No response  
 3=Secondary school       6=Other, specify \_\_\_\_\_

**OCCUPATION/INCOME**

**4 What is the main occupation of the household head?**

*Instructions:* Record the status of the day of visit only.

- 1=Group 1: Managers  
(chief executives, senior officials, legislators; administrative and commercial managers; production and specialized services managers; hospitality, retail and other services managers)
- 2=Group 2: Professional  
(science and engineering professionals; health professionals; teaching professionals; business and administration professionals; information and communications technology professionals; legal, social and cultural professionals)
- 3=Group 3: Technicians and Associate Professionals  
(science and engineering associate professionals; health associate professionals; business and administration associate professionals; legal, social, cultural and related associate professionals; information and communications technicians)
- 4=Group 4: Clerical Support Workers  
(general and keyboard clerks; customer services clerks; numerical and material recording clerks; other clerical support workers)
- 5=Group 5: Services and Sales Workers  
(personal services workers; sales workers; personal care workers; protective services workers)
- 6=Group 6: Skilled Agricultural, Forestry, and Fishery Workers  
(market-oriented skilled agricultural workers; animal producers; market-oriented skilled forestry, fishery and hunting workers; subsistence farmers, fishers, hunters and gatherers)
- 7=Group 7: Craft and Related Trades Workers  
(building and related trades workers (excluding electricians); metal, machinery and related trades workers; handicraft and printing workers; electrical and electronics trades workers; food processing, woodworking, garment and other craft and related trades workers)
- 8=Group 8: Plant and Machine Operators, and Assemblers  
(stationary plant and machine operators; assemblers; drivers and mobile plant operators)
- 9=Group 9: Elementary Occupations  
(cleaners and helpers; agricultural, forestry and fishery labourers; labourers in mining, construction, manufacturing and transport; food preparation assistants; street and related sales and services workers; refuse workers and other elementary workers)
- 10=Group 0: Armed Forces Occupations  
(commissioned armed forces officers; non-commissioned armed forces officers; armed forces occupations, other ranks)
- 11=Other, specify \_\_\_\_\_
- 12=NO OCCUPATION       99=Don't know       98=No response

Site \_\_\_\_\_ Subarea \_\_\_\_\_ House number \_\_\_\_\_

Interviewer ID \_\_\_\_\_

**5 What is the average monthly income of the household head based on the occupation stated in question 4 and of other household members?**

*Instruction:* Tick one answer per household head/enter one code per household member if applicable/if income available.

| Head of household   | Member 1            | Member 2                                 | Member 3         |
|---------------------|---------------------|------------------------------------------|------------------|
| Code _____          | Code _____          | Code _____                               | Code _____       |
| [1] <100USD         | [3] ≥150 to <200USD | [5] ≥250USD                              | [99] Don't know  |
| [2] ≥100 to <150USD | [4] ≥200 to <250USD | [6] Head of household NO INCOME (see Q4) | [98] No response |

**6 Which and how much other/additional source(s) of monthly monetary earnings has this household?**

*Instruction:* Tick all that applies; more than one answer is possible.

| Other/additional sources                                                                                                                                                                                                                                                                                                                           | Overall monthly monetary earnings                                                                                                                                                                        |
|----------------------------------------------------------------------------------------------------------------------------------------------------------------------------------------------------------------------------------------------------------------------------------------------------------------------------------------------------|----------------------------------------------------------------------------------------------------------------------------------------------------------------------------------------------------------|
| <input type="radio"/> 1=Social grants<br><input type="radio"/> 2=Insurance (i.e. private, public)<br><input type="radio"/> 3=Loan (i.e. from friends, family, bank)<br><input type="radio"/> 4=Selling (i.e. livestock, crops, furniture, other goods)<br><input type="radio"/> 5=Personal savings<br><input type="radio"/> 6=Other, specify _____ | <input type="radio"/> 1=<100 USD<br><input type="radio"/> 2=≥100 to <150 USD<br><input type="radio"/> 3=≥150 to <200 USD<br><input type="radio"/> 4=≥200 to <250 USD<br><input type="radio"/> 5=≥250 USD |
| <input type="radio"/> 7=NO OTHER/ADDITIONAL SOURCES<br><input type="radio"/> 99=Don't know<br><input type="radio"/> 98=No response                                                                                                                                                                                                                 |                                                                                                                                                                                                          |

**HOUSING/DWELLING**

**7 Is the house owned by the members of this household?**

- 1=Yes       3=No, supplied (i.e. government, employer)       99=Don't know  
 2=No, rented       4=No, other, specify \_\_\_\_\_       98=No response

**8 How many room(s)/individual house structure(s) of this household are used for sleeping, living, cooking and bathing?**

*Instruction:* Enter one code per category only.

| Bedroom    | Living room | Kitchen          | Bathroom   |
|------------|-------------|------------------|------------|
| Code _____ | Code _____  | Code _____       | Code _____ |
| [1] 1-2    | [3] >4      | [99] Don't know  |            |
| [2] 3-4    | [4] None    | [98] No response |            |

**9 What is the construction material of the floor, the walls and the roof of room(s)/individual house structure(s) of this house?**

*Instruction:* Enter all codes that applies per category; more than one answer per category is possible.

| Floor               | Walls      | Roof                     |
|---------------------|------------|--------------------------|
| Code _____          | Code _____ | Code _____               |
| [1] Brick           | [3] Tiles  | [5] Wood                 |
| [2] Cement/Concrete | [4] Mud    | [6] Straw/Leaves         |
|                     |            | [7] Metal/Tin            |
|                     |            | [8] Other, specify _____ |
|                     |            | [99] Don't know          |
|                     |            | [98] No response         |

**10 Do members of this household have access to/utilize electricity in this household?**

- 1=Yes       2=No       99=Don't know       98=No response

**11 Which main source of light have members of this household access to/are utilizing?**

- 1=Electric light/Light bulb(s)       4=Battery-powered lamp(s)       7=Other, specify \_\_\_\_\_  
 2=Solar light/Solar lamp(s)       5=Candle(s)       99=Don't know  
 3=Paraffin lamp(s)/Oil lamp(s)       6=NO SOURCE OF LIGHT       98=No response



Site \_\_\_\_\_ Subarea \_\_\_\_\_ House number \_\_\_\_\_

Interviewer ID \_\_\_\_\_

**HOUSEHOLD ASSETS****12 Which of the following items do members of this household own?***Instructions:* Tick all that applies; more than one answer is possible; record the quantity of functional items where applicable.

|                                             |                |                            |                                            |                |                            |
|---------------------------------------------|----------------|----------------------------|--------------------------------------------|----------------|----------------------------|
| <input type="radio"/> 1=Radio               | Quantity _____ | <input type="radio"/> None | <input type="radio"/> 11=Tape/CD player    | Quantity _____ | <input type="radio"/> None |
| <input type="radio"/> 2=Television          | Quantity _____ | <input type="radio"/> None | <input type="radio"/> 12=Computer/Laptop   | Quantity _____ | <input type="radio"/> None |
| <input type="radio"/> 3=Internet connection | Quantity _____ | <input type="radio"/> None | <input type="radio"/> 13=Mobile/Cell phone | Quantity _____ | <input type="radio"/> None |
| <input type="radio"/> 4=Car                 | Quantity _____ | <input type="radio"/> None | <input type="radio"/> 14=Truck/Bus         | Quantity _____ | <input type="radio"/> None |
| <input type="radio"/> 5=Motorbike           | Quantity _____ | <input type="radio"/> None | <input type="radio"/> 15=Bicycle           | Quantity _____ | <input type="radio"/> None |
| <input type="radio"/> 6=Oxcart/Donkey       | Quantity _____ | <input type="radio"/> None | <input type="radio"/> 16=Bed               | Quantity _____ | <input type="radio"/> None |
| <input type="radio"/> 7=Mattress            | Quantity _____ | <input type="radio"/> None | <input type="radio"/> 17=Bed net           | Quantity _____ | <input type="radio"/> None |
| <input type="radio"/> 8=Table               | Quantity _____ | <input type="radio"/> None | <input type="radio"/> 18=Chair             | Quantity _____ | <input type="radio"/> None |
| <input type="radio"/> 9=Refrigerator (4°C)  | Quantity _____ | <input type="radio"/> None | <input type="radio"/> 19=Freezer (-20°C)   | Quantity _____ | <input type="radio"/> None |
| <input type="radio"/> 10=Fan                | Quantity _____ | <input type="radio"/> None | <input type="radio"/> 20=Sewing machine    | Quantity _____ | <input type="radio"/> None |

Site \_\_\_\_\_ Subarea \_\_\_\_\_ House number \_\_\_\_\_

Interviewer ID \_\_\_\_\_

**FORM 3: GENERAL HOUSEHOLD INFORMATION**  
**Part C – Hygiene and sanitation**

**TOILET FACILITY**

**1 To what type of toilet facility have members of this household usually access?**

*Instruction: Inside means inside a room/individual house structure/building; outside means outside a room/individual house structure/building.*

- 1=Flush toilet/Water closet (inside)                       8=Composting toilet (outside)  
 2=Flush toilet/Water closet (outside)                       9=NO toilet facility, use a bucket  
 3=Non-flush latrine/pit latrine (inside)                       10=NO toilet facility, dig a hole  
 4=Non-flush latrine/pit latrine (outside)                       11=NO toilet facility, free range/open defecation  
 5=Ventilated Improved Pit Latrine (KVIP, inside)                       12=Other, specify \_\_\_\_\_  
 6=Ventilated Improved Pit Latrine (KVIP, outside)                       99=Don't know  
 7=Composting toilet (inside)                       98=No response

**2 Do members of this household usually utilize the toilet facility stated in question 1?**

- 1=No, members cannot utilize the facility independently (i.e. infants, toddlers)                       6=No, bad condition (i.e. broken, not clean)  
 2=No, members cannot utilize the facility independently (i.e. disabled, long-term/chronically diseased)                       7=YES  
 3=No, members cannot utilize the facility independently (i.e. seniors)                       8=Other, specify \_\_\_\_\_  
 4=No, limited access (i.e. public, shared with other households/community)                       99=Don't know  
 5=No, too far away (i.e. public, shared with other households/community)                       98=No response

**3 Where is the toilet facility stated in question 1 located? With how many other people is it usually shared?**

- 1=On the property of this household (private, not shared)  
 2=On the property of a neighbouring household (private, shared)  
     *Shared*     1=<10 people                       3=25-49 people                       99=Don't know  
                      2=11-24 people                       4=>50 people                       98=No response  
 3=In the community (public, shared)  
     *Shared*     1=<10 people                       3=25-49 people                       99=Don't know  
                      2=11-24 people                       4=>50 people                       98=No response  
 4=Other, specify \_\_\_\_\_                       99=Don't know                       98=No response

**4 How do members of this household that have/don't have access to a toilet facility usually clean their hands directly before and after urination/defecation?**

*Instruction: Enter one code per category only.*

| Clean hands before urination/defecation           | Clean hands after urination/defecation                  |
|---------------------------------------------------|---------------------------------------------------------|
| Code _____                                        | Code _____                                              |
| [1] Wash hands with soap and water                | [6] Don't clean, not needed/not dirty                   |
| [2] Wash hands with water only                    | [7] Don't clean, nothing to clean hands nearby/on hands |
| [3] Rub hands clean with some leaves/straw/ grass | [8] Other, specify _____                                |
| [4] Rub hands clean with some sand                | [99] Don't know                                         |
| [5] Rub hands clean with some cloth/fabric        | [98] No response                                        |

**KITCHEN/FOOD HANDLING**

**5 Do members of this household have a kitchen for cooking/preparing food/meals? Where is it located?**

- 1=Yes, inside kitchen/in a room/individual house structure; on the property of this household (private, not shared)  
 2=Yes, outside kitchen/outside a room/individual house structure/ open air; on the property of this

Site \_\_\_\_\_ Subarea \_\_\_\_\_ House number \_\_\_\_\_

Interviewer ID \_\_\_\_\_

household (private, not shared)

3=Yes, inside kitchen/in a room/individual house structure; on the property of a neighbouring household (private, shared)

4=Yes, outside kitchen/outside a room/individual house structure/ open air; on the property of a neighbouring household (private, shared)

5=NO KITCHEN

6=Other, specify \_\_\_\_\_  99=Don't know  98=No response

**6 What energy source do members of this household usually use for cooking/preparing food/meals?**

1=Electricity  3=Charcoal  5=Animal dung  99=Don't know  
 2=Gas/Kerosene  4=Wood/straw/leaves  6=Other, specify \_\_\_\_\_  98=No response

**7 What cooking spot do members of this household usually use for cooking/preparing food/meals?**

1=Open fire  3=Closed stove with chimney  99=Don't know  
 2=Open stove  4=Other, specify \_\_\_\_\_  98=No response

**8 Where do members of this household usually store fresh/raw food items (e.g. vegetables, lettuce, fruits, dairy products, eggs, meat and fish) and left-over/prepared food/meals?**

*Instruction:* Enter one code per category only. Inside means inside a room/individual house structure/building; outside means outside a room/individual house structure/building.

| Fresh/raw food items (i.e. vegetables, lettuce, fruits, dairy products, eggs, meat and fish)                                                                                                                                                                                                                                                                                                                                                                                                                                                                                                                                                                                                                                                                                             | Left-over/prepared food/meals |
|------------------------------------------------------------------------------------------------------------------------------------------------------------------------------------------------------------------------------------------------------------------------------------------------------------------------------------------------------------------------------------------------------------------------------------------------------------------------------------------------------------------------------------------------------------------------------------------------------------------------------------------------------------------------------------------------------------------------------------------------------------------------------------------|-------------------------------|
| Code _____                                                                                                                                                                                                                                                                                                                                                                                                                                                                                                                                                                                                                                                                                                                                                                               | Code _____                    |
| [1] At room temperature (inside, on the property of this household, private)<br>[2] At room temperature (outside, on the property of this household, private)<br>[3] At room temperature (inside, on the property of a neighboring household, private, shared)<br>[4] At room temperature (outside, on the property of a neighboring household, private, shared)<br>[5] Refrigerator (on the property of this household, private)<br>[6] Refrigerator (on the property of a neighboring household, private, shared)<br>[7] Freezer (on the property of this household, private)<br>[8] Freezer (on the property of a neighboring household, private, shared)<br>[9] Other, specify _____<br>[10] NO STORAGE <input type="radio"/> [99] Don't know <input type="radio"/> [98] No response |                               |

**9 If the answer is "Room temperature" for fresh/raw food items and/or left-over/prepared food/meals in question 8, how long do members of this household usually store them?**

*Instruction:* Enter one code per category only.

| Fresh/raw food items (i.e. vegetables, lettuce, fruits, dairy products, eggs, meat and fish)                                                                                                                                                                      | Left-over/prepared food/meals |
|-------------------------------------------------------------------------------------------------------------------------------------------------------------------------------------------------------------------------------------------------------------------|-------------------------------|
| Code _____                                                                                                                                                                                                                                                        | Code _____                    |
| [1] <1 day <input type="radio"/> [3] 3-4 days <input type="radio"/> [5] Not applicable <input type="radio"/> [99] Don't know <input type="radio"/><br>[2] 1-2 days <input type="radio"/> [4] >4 days <input type="radio"/> [98] No response <input type="radio"/> |                               |

**10 Do members of this household usually cover left-over/prepared food/meals? Do they re-heat/re-cook left-over/prepared food/meals prior to consumption?**

*Instruction:* Enter one code per category only.

| Cover left-over/prepared food/meals                                                                                                     | Re-heat/Re-cook left-over/prepared food/meals |
|-----------------------------------------------------------------------------------------------------------------------------------------|-----------------------------------------------|
| Code _____                                                                                                                              | Code _____                                    |
| [1] Yes <input type="radio"/> [2] No <input type="radio"/> [99] Don't know <input type="radio"/> [98] No response <input type="radio"/> |                                               |

Site \_\_\_\_\_ Subarea \_\_\_\_\_ House number \_\_\_\_\_

Interviewer ID \_\_\_\_\_

**11 Which member(s) of this household usually cook(s)/prepare(s) food/meals for other members of this household?**

*Instructions:* Refer to question 9 of "Form 3 Part A – Demographic data/General household information" and record the initials/identifier(s) of the member.

Household member, record initials/identifier(s) \_\_\_\_\_  99=Don't know  98=No response

**12 How does/do the household member(s) that usually cook(s)/prepare(s) food/meals for other members of this household as stated in question 11 usually prepare(s) herself/himself/themselves before and after the preparation of meals?**

*Instruction:* Enter one code per category only.

| Before the preparation of meals                   | After the preparation of meals                          |
|---------------------------------------------------|---------------------------------------------------------|
| Code _____                                        | Code _____                                              |
| [1] Wash hands with soap and water                | [6] Don't clean, not needed/not dirty                   |
| [2] Wash hands with water only                    | [7] Don't clean, nothing to clean hands nearby/on hands |
| [3] Rub hands clean with some leaves/straw/ grass | [8] Other, specify _____                                |
| [4] Rub hands clean with some sand                | [99] Don't know                                         |
| [5] Rub hands clean with some cloth/fabric        | [98] No response                                        |

**13 How do members of this household usually prepare themselves before and after eating food/meals, including the household member that usually cooks/prepares food/meals as stated in question 11?**

*Instruction:* Enter one code per category only.

| Before the eating of food/meals                   | After the eating of food/meals                          |
|---------------------------------------------------|---------------------------------------------------------|
| Code _____                                        | Code _____                                              |
| [1] Wash hands with soap and water                | [6] Don't clean, not needed/not dirty                   |
| [2] Wash hands with water only                    | [7] Don't clean, nothing to clean hands nearby/on hands |
| [3] Rub hands clean with some leaves/straw/ grass | [8] Other, specify _____                                |
| [4] Rub hands clean with some sand                | [99] Don't know                                         |
| [5] Rub hands clean with some cloth/fabric        | [98] No response                                        |

**14 How do members of this household usually eat their food/meals, including the household member that usually cooks/prepares food/meals as stated in question 11?**

1=With cutlery  3=Other, specify \_\_\_\_\_  99=Don't know

2=With fingers  98=No response

**15 Do members of this household usually eat their food/meals from the same pot, including the household member that usually cooks/prepares food/meals as stated in question 11?**

1=Yes  2=No  99=Don't know  98=No response

**16 Where do members of this household usually get their main fresh/raw food items such as vegetables, fruits and grains/cereals, dairy products, eggs, meat and fish?**

*Instruction:* Enter one code per category only.

| Vegetables, fruits, grains/ cereals     | Dairy products                            | Eggs, meat, fish |
|-----------------------------------------|-------------------------------------------|------------------|
| Code _____                              | Code _____                                | Code _____       |
| [1] Self-farming (i.e. back-/courtyard) | [6] Self-farming (i.e. agricultural land) |                  |
| [2] Supermarket/Grocery store           | [7] Butcher                               |                  |
| [3] Friend/Family                       | [8] Other, specify _____                  |                  |
| [4] Open market                         | [99] Don't know                           |                  |
| [5] Street vendor                       | [98] No response                          |                  |

**17 Do members of this household usually consume/eat fresh/raw food items (e.g. vegetables, lettuce, fruits, dairy products, ice cream, eggs, meat and fish)? If so, which ones?**

Site \_\_\_\_\_ Subarea \_\_\_\_\_ House number \_\_\_\_\_ Interviewer ID \_\_\_\_\_

*Instruction:* Tick all that applies; more than one answer is possible.

- 1=Vegetables/Lettuce (cultivated on bush)
- 2=Vegetables/Lettuce (wild harvesting from bush)
- 3=Fruits (cultivated on bush/tree)
- 4=Fruits (wild harvesting from bush/tree)
- 5=Dairy products (i.e. milk, cheese, yoghurt from domesticated milk producing animals), specify \_\_\_\_\_
- 6=Eggs (from domesticated poultry), specify \_\_\_\_\_
- 7=Animal blood (from domesticated animals), specify \_\_\_\_\_
- 8=Beef/Zebu/Buffalo (domesticated), specify \_\_\_\_\_
- 9=Pork (domesticated)
- 10=Sheep (domesticated)
- 11=Meat from non-domesticated animals (i.e. antelope, boar, poultry, rodents, fish), specify \_\_\_\_\_
- 12=NO CONSUMPTION of fresh/raw food items
- 13=Vegetables/Lettuce (cultivated on ground)
- 14=Vegetables/Lettuce (wild harvesting from ground)
- 15=Fruits (cultivated on ground)
- 16=Fruits (wild harvesting from ground)
- 17=Dairy products (i.e. milk, cheese, yoghurt from non-domesticated milk producing animals), specify \_\_\_\_\_
- 18=Eggs (from non-domesticated poultry), specify \_\_\_\_\_
- 19=Animal blood (from non-domesticated animals), specify \_\_\_\_\_
- 20=Poultry (domesticated; i.e. chicken, duck, pigeon, goose, turkey), specify \_\_\_\_\_
- 21=Goat (domesticated)
- 22=Rodents (domesticated), specify \_\_\_\_\_
- 23=Fish/Seafood, specify \_\_\_\_\_
- 24=Ice cream
- 25=Other, specify \_\_\_\_\_
- 99=Don't know     98=No response

**18 Do members of this household consume meals/food items/beverages usually also outside the house? If so, which member(s) of this household and where?**

*Instructions:* Refer to question 9 of "Form 3 Part A – Demographic data/General household information" and record the initials/identifier of the member(s). Enter all codes that apply for the respective household member.

| Member 1<br>Initials/Identifier: _____ | Member 2<br>Initials/Identifier: _____ | Member 3<br>Initials/Identifier: _____         | Member 4<br>Initials/Identifier: _____ |
|----------------------------------------|----------------------------------------|------------------------------------------------|----------------------------------------|
| Code _____                             | Code _____                             | Code _____                                     | Code _____                             |
| [1] Restaurant<br>[2] Fast food chain  | [3] Cafeteria<br>[4] Street vendor     | [5] Other, specify _____<br>[6] Not applicable | [99] Don't know<br>[98] No response    |

**19 Which meals/food items/beverages do the member(s) of this household listed in question 18 usually consume outside the house?**

*Instructions:* Refer to question 9 of "Form 3 Part A – Demographic data/General household information" and record the initials/identifier of the member(s). List up to 5 meals/food items/beverages per household member. You can refer to food items listed in question 17. Skip this question if no household member consumes meals/food items/beverages outside the house as stated in Q18.

| Member 1<br>Initials/Identifier: _____ | Member 2<br>Initials/Identifier: _____ | Member 3<br>Initials/Identifier: _____ | Member 4<br>Initials/Identifier: _____ |
|----------------------------------------|----------------------------------------|----------------------------------------|----------------------------------------|
| 1: _____                               | 1: _____                               | 1: _____                               | 1: _____                               |
| 2: _____                               | 2: _____                               | 2: _____                               | 2: _____                               |
| 3: _____                               | 3: _____                               | 3: _____                               | 3: _____                               |
| 4: _____                               | 4: _____                               | 4: _____                               | 4: _____                               |
| 5: _____                               | 5: _____                               | 5: _____                               | 5: _____                               |

**WATER**

**20 What is the main water supply for members of this household for drinking, cooking/preparing food/meals, bathing, and cleaning (of house/individual house structure(s), clothing/kitchen tools)?**

*Instruction:* Enter one code per category only.

| Drinking                                                        | Cooking    | Bathing    | Cleaning   |
|-----------------------------------------------------------------|------------|------------|------------|
| Code _____                                                      | Code _____ | Code _____ | Code _____ |
| [1] Tap water (inside the house; private)                       |            |            |            |
| [2] Tap water (outside the house i.e. back-/courtyard; private) |            |            |            |

Site \_\_\_\_\_ Subarea \_\_\_\_\_ House number \_\_\_\_\_

Interviewer ID \_\_\_\_\_

- [3] Tap water (outside the house; public/shared)  
 [4] Standpipe/Piped water (inside the house; private)  
 [5] Standpipe/Piped water (outside the house i.e. back-/ courtyard; private)  
 [6] Standpipe/Piped water (outside the house; public/shared)  
 [7] Water truck (public; shared)  
 [8] Surface water (i.e. canal, irrigation canal)  
 [9] Surface water (i.e. lake, pond, river, stream)  
 [10] Spring water  
 [11] Rain water  
 [12] Well/Borehole (open/uncovered/unprotected)  
 [13] Well/Borehole (covered/protected)  
 [14] Bottled water  
 [15] Other, specify \_\_\_\_\_ [99] Don't know [98] No response

**21 Do members of this household usually treat water for drinking, cooking/ preparing food/meals, bathing, and cleaning (of house/individual house structure(s), clothing/ kitchen tools) prior to consumption? How is water usually treated?**

*Instruction:* Enter all codes that applies per category; more than one answer per category is possible.

| Drinking                                          | Cooking                                         | Bathing                                             | Cleaning                         |
|---------------------------------------------------|-------------------------------------------------|-----------------------------------------------------|----------------------------------|
| Code _____                                        | Code _____                                      | Code _____                                          | Code _____                       |
| [1] No, not at all                                | [7] No, only for children of this household     | [8] No, only depending on the season (rainy season) | [9] Yes, boiling                 |
| [2] No, only for sick members of this household   | [10] Yes, solar disinfection                    | [11] Yes, chlorination                              | [99] Don't know [98] No response |
| [3] No, only depending on the season (dry season) | [4] Yes, filtration (i.e. cloth, ceramic, sand) | [5] Yes, sedimentation                              |                                  |
| [6] Other, specify _____                          |                                                 |                                                     |                                  |

**22 Which member(s) of this household usually collect(s) the drinking water as stated in question 20 for other members of this household?**

*Instructions:* Refer to question 9 of "Form 3 Part A – Demographic data/General household information" and record the initials/identifier of the member.

Household member, record initials/identifier(s) \_\_\_\_\_  99=Don't know  98=No response

**23 How do members of this household usually store the drinking water stated in question 20?**

- 1=Water tank (uncovered)  10=Bowl (covered with i.e. cloth/fabric, lid, leaves)  
 2=Water tank (covered with i.e. cloth/fabric, lid, leaves)  11=Wooden pot (uncovered)  
 3=Container (uncovered)  12=Wooden pot (covered with i.e. cloth/fabric, lid, leaves)  
 4=Container (covered with i.e. cloth/fabric, lid, leaves)  13=Skin vessel (i.e. goat, sheep, cattle; uncovered)  
 5=Clay pot (uncovered)  14=Skin vessel (i.e. goat, sheep, cattle; covered with i.e. cloth/fabric, lid, leaves)  
 6=Clay pot (covered with i.e. cloth/fabric, lid, leaves)  15=NOT STORED  
 7=Bucket (uncovered)  16=Other, specify \_\_\_\_\_  
 8=Bucket (covered with i.e. cloth/fabric, lid, leaves)  99=Don't know  
 9=Bowl (uncovered)  98=No response

**24 If members of this household use a shared drinking water supply as stated in question 20, with how many other people is this drinking water supply usually shared?**

- 1=<10 people  3=25-49 people  5=NOT SHARED  99=Don't know  
 2=11-24 people  4=>50 people  98=No response

Site \_\_\_\_\_ Subarea \_\_\_\_\_ House number \_\_\_\_\_

Interviewer ID \_\_\_\_\_

**WASTE DISPOSAL****25 Where do members of this household usually dispose waste water from e.g. cooking/preparation of food/meals, bathing and/or cleaning, dispose domestic waste, human waste/excreta?***Instruction:* Enter one code per category only.

| Waste water from (e.g. cooking/preparation of food/ meals, bathing and/or cleaning)                                                                                                                                                                                                                                                                                                                                                                                                                                                                                                                                                                                                                                                                                                                                                                                                                                                                 | Domestic waste | Human waste/excreta |
|-----------------------------------------------------------------------------------------------------------------------------------------------------------------------------------------------------------------------------------------------------------------------------------------------------------------------------------------------------------------------------------------------------------------------------------------------------------------------------------------------------------------------------------------------------------------------------------------------------------------------------------------------------------------------------------------------------------------------------------------------------------------------------------------------------------------------------------------------------------------------------------------------------------------------------------------------------|----------------|---------------------|
| Code _____                                                                                                                                                                                                                                                                                                                                                                                                                                                                                                                                                                                                                                                                                                                                                                                                                                                                                                                                          | Code _____     | Code _____          |
| [1] On the ground/free range near the house (i.e. back-/courtyard, private)<br>[2] On the ground/free range away from the house in the community (shared, public)<br>[3] In a hole near the house (i.e. back-/courtyard, private)<br>[4] In a hole away from the house in the community (shared, public)<br>[5] Pour in surface water in the community (i.e. lake, pond, river, stream, public, shared)<br>[6] Pour in surface water in the community (i.e. canal, irrigation canal, public, shared)<br>[7] Pour in spring water in the community (public, shared)<br>[8] Pour in a septic tank near the house (i.e. back-/courtyard, near toilet facility if available, private)<br>[9] Pour in a septic tank in the community (shared, public)<br>[10] Pour in the sewer near the house (i.e. back-/courtyard, private)<br>[11] Pour in the sewer in the community (shared, public)<br>[12] Other, specify _____ [99] Don't know [98] No response |                |                     |

**26 Do members of this household usually pre-process domestic waste from this house prior to disposing it?**

- 1=Yes, burning garbage  3=NO  
 2=Yes, separate/sort out degradable from non-degradable garbage  4=Yes, other, specify \_\_\_\_\_  
 99=Don't know  98=No response

**27 How far from the main drinking water supply of this household as stated in question 20 is the location for disposal of waste water, domestic waste and human waste/excreta of this household as stated in question 25?***Instructions:* Enter one code per category only. Record the distance as meter [m].

| Waste water from (e.g. cooking/preparation of food/ meals, bathing and/or cleaning)                                                                  | Domestic waste | Human waste/excreta |
|------------------------------------------------------------------------------------------------------------------------------------------------------|----------------|---------------------|
| Code _____                                                                                                                                           | Code _____     | Code _____          |
| [1] <5 m [3] ≥25 to <50 m [5] ≥100 to <500 m [7] ≥1,000 m<br>[2] ≥5 to <25 m [4] ≥50 to <100 m [6] ≥500 to <1,000 m [99] Don't know [98] No response |                |                     |

**28 How far from the main water supply for cooking/preparing food/meals of this household as stated in question 20 is the location for disposal of waste water, domestic waste and human waste/excreta of this household as stated in question 25?***Instructions:* Enter one code per category only. Record the distance as meter [m].

| Waste water from (e.g. cooking/preparation of food/ meals, bathing and/or cleaning)                                                                  | Domestic waste | Human waste/excreta |
|------------------------------------------------------------------------------------------------------------------------------------------------------|----------------|---------------------|
| Code _____                                                                                                                                           | Code _____     | Code _____          |
| [1] <5 m [3] ≥25 to <50 m [5] ≥100 to <500 m [7] ≥1,000 m<br>[2] ≥5 to <25 m [4] ≥50 to <100 m [6] ≥500 to <1,000 m [99] Don't know [98] No response |                |                     |

**FARM/DOMESTIC ANIMALS****29 What kind of farm animals/livestock and domestic animals/pets do members of this household have?***Instruction:* Tick all that applies per category; more than one answer per category is possible.

Site \_\_\_\_\_ Subarea \_\_\_\_\_ House number \_\_\_\_\_

Interviewer ID \_\_\_\_\_

| Farm animals/livestock                                                                     |                                                                | Domestic animals/pets                                        |
|--------------------------------------------------------------------------------------------|----------------------------------------------------------------|--------------------------------------------------------------|
| <input type="radio"/> 1=Cattle                                                             | <input type="radio"/> 9=Camel                                  | <input type="radio"/> 1=Dog                                  |
| <input type="radio"/> 2=Sheep                                                              | <input type="radio"/> 10= Rodents (i.e. rabbit), specify _____ | <input type="radio"/> 2=Rodents (i.e. rabbit), specify _____ |
| <input type="radio"/> 3=Donkey                                                             | <input type="radio"/> 11=Goat                                  | <input type="radio"/> 3=Cat                                  |
| <input type="radio"/> 4=Poultry (i.e. chicken, duck, pigeon, goose, turkey), specify _____ | <input type="radio"/> 12=Horse                                 | <input type="radio"/> 4=NO DOMESTIC ANIMALS/PETS             |
| <input type="radio"/> 5=Zebu                                                               | <input type="radio"/> 13=NO FARM ANIMALS/LIVESTOCK             | <input type="radio"/> 5=Other, specify _____                 |
| <input type="radio"/> 6=Pig                                                                | <input type="radio"/> 14=Other, specify _____                  | <input type="radio"/> 99=Don't know                          |
| <input type="radio"/> 7=Fish                                                               | <input type="radio"/> 99=Don't know                            | <input type="radio"/> 98=No response                         |
| <input type="radio"/> 8=Buffalo                                                            | <input type="radio"/> 98=No response                           |                                                              |

**30 Where do members of this household usually keep farm animals/livestock and domestic animals/pets of this household as stated in question 29?**

*Instruction:* Tick one answer per category only.

| Farm animals/livestock                                                                                                   | Domestic animals/pets                                                                  |
|--------------------------------------------------------------------------------------------------------------------------|----------------------------------------------------------------------------------------|
| <input type="radio"/> 1=Stable/Cage/Water basin on the property of the house (i.e. back-/courtyard)                      | <input type="radio"/> 1=Cage/Chain near the house (i.e. back-/courtyard)               |
| <input type="radio"/> 2=Stable/Cage/Water basin outside the house in the community                                       | <input type="radio"/> 2=Cage/Chain outside the house in the community                  |
| <input type="radio"/> 3=Stable/Cage/Water basin outside the community                                                    | <input type="radio"/> 3=Cage/Chain outside the community (public)                      |
| <input type="radio"/> 4=Free range/Surface water/Spring water on the property of the house (i.e. house, back-/courtyard) | <input type="radio"/> 4=Free range near the house (i.e. in the house, back-/courtyard) |
| <input type="radio"/> 5=Free range/Surface water/Spring water outside the house in the community                         | <input type="radio"/> 5=Free range outside the house in the community                  |
| <input type="radio"/> 6=Free range/Surface water/Spring water outside the community                                      | <input type="radio"/> 6=Free range outside the community                               |
| <input type="radio"/> 7=Not applicable (nowhere/no farm animals/livestock)                                               | <input type="radio"/> 7=Not applicable (nowhere/no domestic animals/pets)              |
| <input type="radio"/> 8=Other, specify _____                                                                             | <input type="radio"/> 8=Other, specify _____                                           |
| <input type="radio"/> 99=Don't know                                                                                      | <input type="radio"/> 99=Don't know                                                    |
| <input type="radio"/> 98=No response                                                                                     | <input type="radio"/> 98=No response                                                   |

**31 What is the extent of the livestock farming that members of this household practice?**

- |                                                                        |                                              |
|------------------------------------------------------------------------|----------------------------------------------|
| <input type="radio"/> 1=Own demand ("backyard farming")                | <input type="radio"/> 4=Other, specify _____ |
| <input type="radio"/> 2=Not applicable (no livestock farming)          | <input type="radio"/> 99=Don't know          |
| <input type="radio"/> 3=Mass/Industrial demand ("mass animal farming") | <input type="radio"/> 98=No response         |

**32 Which water supply do members of this household usually use to water farm animals/livestock and domestic animals/pets of this household as stated in question 29?**

*Instruction:* Enter one code per category only.

| Farm animals/livestock                                                       | Domestic animals/pets |
|------------------------------------------------------------------------------|-----------------------|
| Code _____                                                                   | Code _____            |
| [1] Tap water (inside the house; private)                                    |                       |
| [2] Tap water (outside the house i.e. back-/courtyard; private)              |                       |
| [3] Tap water (outside the house; public/shared)                             |                       |
| [4] Standpipe/Piped water (inside the house; private)                        |                       |
| [5] Standpipe/Piped water (outside the house i.e. back-/ courtyard; private) |                       |
| [6] Standpipe/Piped water (outside the house; public/shared)                 |                       |



Site \_\_\_\_\_ Subarea \_\_\_\_\_ House number \_\_\_\_\_

Interviewer ID \_\_\_\_\_

- [7] Water truck (public; shared)
- [8] Surface water (i.e. canal, irrigation canal)
- [9] Surface water (i.e. lake, pond, river, stream)
- [10] Spring water
- [11] Rain water
- [12] Well/Borehole (open/uncovered/unprotected)
- [13] Well/Borehole (covered/protected)
- [14] Not applicable (no farm animals/livestock; no domestic animals/pets)
- [15] Other, specify \_\_\_\_\_ [99] Don't know [98] No response

**33 Do members of this household usually wash their hands after they fed & watered and cleaned the stable/cage/water basin of the farm animals/livestock and domestic animals/pets of this household as stated in question 29?**

*Instruction:* Enter one code per category only.

| Farm animals/livestock                            | Domestic animals/pets                                                    |
|---------------------------------------------------|--------------------------------------------------------------------------|
| Code _____                                        | Code _____                                                               |
| [1] Wash hands with soap and water                | [7] Don't clean, nothing to clean hands nearby/on hands                  |
| [2] Wash hands with water only                    | [8] Other, specify _____                                                 |
| [3] Rub hands clean with some leaves/straw/ grass | [9] Not applicable (no farm animals/livestock; no domestic animals/pets) |
| [4] Rub hands clean with some sand                | [99] Don't know                                                          |
| [5] Rub hands clean with some cloth/fabric        | [98] No response                                                         |
| [6] Don't clean, not needed/not dirty             |                                                                          |

**CROP FARMING**

**34 What kind of crops do members of this household grow/cultivate?**

*Instruction:* Tick all that applies; more than one answer is possible.

- 1=Coffee
- 2=Rice
- 3=Fruits (cultivated on bush/tree)
- 4=Fruits (cultivated on the ground)
- 5=Vegetables/Lettuce (cultivated on bush/tree)
- 6=Vegetables/Lettuce (cultivated on the ground)
- 7=Grains (i.e. wheat, barley, oat, corn)
- 8=Tea
- 9=Cashew
- 10=Tobacco
- 11=Sugar cane
- 12=Chad/Chat
- 13=Bees/Honey
- 14=Cotton
- 15=NO CROPS
- 16=Other, specify \_\_\_\_\_
- 99=Don't know
- 98=No response

**35 Where do members of this household have the farmland/agricultural land for crop farming?**

- 1=On the property of the house (i.e. back-/courtyard)
- 2=Outside the community
- 3=Other, specify \_\_\_\_\_
- 4=Outside the house in the community
- 5=Not applicable (no crop farming)
- 99=Don't know
- 98=No response

**36 What is the extent of the crop farming that members of this household practice?**

- 1=Own demand ("backyard farming")
- 2=Not applicable (no crop farming)
- 3=Mass/Industrial demand ("mass crop farming")
- 4=Other, specify \_\_\_\_\_
- 99=Don't know
- 98=No response

**37 Do members of this household usually use herbicides, pesticides and fertilizers for the crop farming as stated in question 34?**

*Instruction:* Tick one answer per category only.

| Herbicides                                     | Pesticides                                     | Fertilizers                                     |
|------------------------------------------------|------------------------------------------------|-------------------------------------------------|
| <input type="radio"/> 1=Yes, specify herbicide | <input type="radio"/> 1=Yes, specify pesticide | <input type="radio"/> 1=Yes, specify fertilizer |

Site \_\_\_\_\_ Subarea \_\_\_\_\_ House number \_\_\_\_\_

Interviewer ID \_\_\_\_\_

- 2=Not applicable (no crop farming)
- 3=No use of herbicides
- 99=Don't know
- 98=No response

- 2=Not applicable (no crop farming)
- 3=No use of pesticides
- 99=Don't know
- 98=No response

- 2=Not applicable (no crop farming)
- 3=No use of fertilizers
- 99=Don't know
- 98=No response

**38 Do members of this household usually wash their hands after the fieldwork for the crop farming as stated in question 34?**

- 1=Yes, wash hands with soap and water
- 2=Yes, rub hands clean with some leaves/straw/grass
- 3=Yes, rub hands clean with some cloth/fabric
- 4=Not applicable (no crop farming)
- 5=Yes, wash hands with water only
- 6=Yes, rub hands clean with some sand
- 7=No, don't clean my hands
- 8=Other, specify \_\_\_\_\_
- 99=Don't know
- 98=No response

Site \_\_\_\_\_ Subarea \_\_\_\_\_ House number \_\_\_\_\_

Interviewer ID \_\_\_\_\_

## FORM 4: ASSESSMENT OF OVERALL, AGE- AND SEX-STRATIFIED GENERIC HEALTHCARE UTILIZATION

### Part A – Assessment of *generic* healthcare utilization

#### Instructions to the interviewer

- Complete this form only if the respondent consented to participate (see "Form 2 - CONSENT FORM"); the respondent as defined for this investigation is an adult (at the country-specific legal age of majority) household member and decision-maker with respect to daily healthcare/healthcare utilization for the entire household and its members; it must not be e.g. a neighbour or a visitor.
- Refer to "Form 3 – Part A - GENERAL HOUSEHOLD INFORMATION" as a reference to obtain the total number of household members as well as age and sex of each household member.
- Collect data about all household members regardless of whether all household members are present at the time of the interview; collecting and recording data only about individuals present at the time of the interview will result in biased data.
- A household is/household members are defined as a person or a group of related or unrelated persons that live together in the same dwelling unit, that acknowledge one male or female adult as the head of the household, that share the same housekeeping arrangements, that are considered to constitute one unit, and that provide themselves with food or other essentials for living.
- "Site" and "Subarea" must be entered each as a 3-digit, "House number" as a 4-digit, and "Interviewer ID" as a 2-digit code (use lists individually prepared for each site to obtain codes). "Study label" must be a combination of a 3-digit "Site" code, a 3-digit "Subarea" code and a 4-digit "House number" code; the "Interviewer ID" must be entered as a 3-digit code.
- Abbreviation: HCF=private/public primary/secondary/tertiary healthcare facility.

#### HOUSEHOLD MEMBERS

##### 1 Record the total number of household members of this house (at the day of visit).

*Instructions:* The total number of household members must be recorded as a 2-digit number; see also "Form 3 – Part A - GENERAL HOUSEHOLD INFORMATION".

Total number of household members: \_\_\_\_\_

##### 2 Record the number of FEMALE household members by each of the following age groups:

*Instructions:* The total number of female household members by age group must be recorded as a 2-digit number; see also "Form 3 – Part A - GENERAL HOUSEHOLD INFORMATION".

<2years: \_\_\_\_\_ ≥2 to <5years: \_\_\_\_\_ ≥5 to <15years: \_\_\_\_\_ ≥15years: \_\_\_\_\_

##### 3 Record the number of MALE household members by each of the following age groups:

*Instructions:* The total number of male household members by age group must be recorded as a 2-digit number; see also "Form 3 – Part A - GENERAL HOUSEHOLD INFORMATION".

<2years: \_\_\_\_\_ ≥2 to <5years: \_\_\_\_\_ ≥5 to <15years: \_\_\_\_\_ ≥15years: \_\_\_\_\_

#### HEALTHCARE SEEKING BEHAVIOR

##### 4 Record where female/male household members <2years/≥2 to <5years/≥5 to <15years/≥15years of age usually seek healthcare for the following signs/symptoms. Please rate using a range from 1-4.

#### *Instructions:*

- Complete question 4 separately for female and male household members <2years, ≥2 to <5years, ≥5 to <15years and ≥15years of age and circle the sex and age group Q4 was completed for; skip question 4 if there is no female/male household member <2years/ ≥2 to <5years/ ≥5 to <15years/ ≥15years of age.
- Provide an answer to each healthcare option for each sign/symptom; use range 1-4 for rating (1=1<sup>st</sup> choice; 2=2<sup>nd</sup> choice; 3=3<sup>rd</sup> choice; 4=not chosen); enter a code where applicable by using prepared lists (use lists individually prepared for each site to obtain codes); tick "Don't know" if applicable.

Site \_\_\_\_\_ Subarea \_\_\_\_\_ House number \_\_\_\_\_

Interviewer ID \_\_\_\_\_

| Sign/Symptom                                   | Healthcare options       |      |                          |      |                          |                          |                          |                          |                          |                       |
|------------------------------------------------|--------------------------|------|--------------------------|------|--------------------------|--------------------------|--------------------------|--------------------------|--------------------------|-----------------------|
|                                                | Study-HCF                |      | Other HCF                |      | Physician                | Pharmacy                 | Traditional healer       | Nowhere Self-treatment   | Nowhere Nothing          | Don't know            |
|                                                | Rate                     | Code | Rate                     | Code | Rate                     | Rate                     | Rate                     | Rate                     | Rate                     | Tick                  |
| <b>1 [A]</b> Fever, any                        | O=1<br>O=2<br>O=3<br>O=4 |      | O=1<br>O=2<br>O=3<br>O=4 |      | O=1<br>O=2<br>O=3<br>O=4 | O=1<br>O=2<br>O=3<br>O=4 | O=1<br>O=2<br>O=3<br>O=4 | O=1<br>O=2<br>O=3<br>O=4 | O=1<br>O=2<br>O=3<br>O=4 | <input type="radio"/> |
| <b>2</b> Fever <3days (continuous)             | O=1<br>O=2<br>O=3<br>O=4 |      | O=1<br>O=2<br>O=3<br>O=4 |      | O=1<br>O=2<br>O=3<br>O=4 | O=1<br>O=2<br>O=3<br>O=4 | O=1<br>O=2<br>O=3<br>O=4 | O=1<br>O=2<br>O=3<br>O=4 | O=1<br>O=2<br>O=3<br>O=4 | <input type="radio"/> |
| <b>3</b> Fever ≥3days (continuous)             | O=1<br>O=2<br>O=3<br>O=4 |      | O=1<br>O=2<br>O=3<br>O=4 |      | O=1<br>O=2<br>O=3<br>O=4 | O=1<br>O=2<br>O=3<br>O=4 | O=1<br>O=2<br>O=3<br>O=4 | O=1<br>O=2<br>O=3<br>O=4 | O=1<br>O=2<br>O=3<br>O=4 | <input type="radio"/> |
| <b>4</b> Chills Shivering                      | O=1<br>O=2<br>O=3<br>O=4 |      | O=1<br>O=2<br>O=3<br>O=4 |      | O=1<br>O=2<br>O=3<br>O=4 | O=1<br>O=2<br>O=3<br>O=4 | O=1<br>O=2<br>O=3<br>O=4 | O=1<br>O=2<br>O=3<br>O=4 | O=1<br>O=2<br>O=3<br>O=4 | <input type="radio"/> |
| <b>5</b> Convulsion                            | O=1<br>O=2<br>O=3<br>O=4 |      | O=1<br>O=2<br>O=3<br>O=4 |      | O=1<br>O=2<br>O=3<br>O=4 | O=1<br>O=2<br>O=3<br>O=4 | O=1<br>O=2<br>O=3<br>O=4 | O=1<br>O=2<br>O=3<br>O=4 | O=1<br>O=2<br>O=3<br>O=4 | <input type="radio"/> |
| <b>6</b> Weight loss                           | O=1<br>O=2<br>O=3<br>O=4 |      | O=1<br>O=2<br>O=3<br>O=4 |      | O=1<br>O=2<br>O=3<br>O=4 | O=1<br>O=2<br>O=3<br>O=4 | O=1<br>O=2<br>O=3<br>O=4 | O=1<br>O=2<br>O=3<br>O=4 | O=1<br>O=2<br>O=3<br>O=4 | <input type="radio"/> |
| <b>7</b> Dehydration                           | O=1<br>O=2<br>O=3<br>O=4 |      | O=1<br>O=2<br>O=3<br>O=4 |      | O=1<br>O=2<br>O=3<br>O=4 | O=1<br>O=2<br>O=3<br>O=4 | O=1<br>O=2<br>O=3<br>O=4 | O=1<br>O=2<br>O=3<br>O=4 | O=1<br>O=2<br>O=3<br>O=4 | <input type="radio"/> |
| <b>8</b> Malaise Weakness/ Fatigue             | O=1<br>O=2<br>O=3<br>O=4 |      | O=1<br>O=2<br>O=3<br>O=4 |      | O=1<br>O=2<br>O=3<br>O=4 | O=1<br>O=2<br>O=3<br>O=4 | O=1<br>O=2<br>O=3<br>O=4 | O=1<br>O=2<br>O=3<br>O=4 | O=1<br>O=2<br>O=3<br>O=4 | <input type="radio"/> |
| <b>9</b> Aches/ Pain (muscle/joint/bone)       | O=1<br>O=2<br>O=3<br>O=4 |      | O=1<br>O=2<br>O=3<br>O=4 |      | O=1<br>O=2<br>O=3<br>O=4 | O=1<br>O=2<br>O=3<br>O=4 | O=1<br>O=2<br>O=3<br>O=4 | O=1<br>O=2<br>O=3<br>O=4 | O=1<br>O=2<br>O=3<br>O=4 | <input type="radio"/> |
| <b>10</b> Headache                             | O=1<br>O=2<br>O=3<br>O=4 |      | O=1<br>O=2<br>O=3<br>O=4 |      | O=1<br>O=2<br>O=3<br>O=4 | O=1<br>O=2<br>O=3<br>O=4 | O=1<br>O=2<br>O=3<br>O=4 | O=1<br>O=2<br>O=3<br>O=4 | O=1<br>O=2<br>O=3<br>O=4 | <input type="radio"/> |
| <b>11</b> Dizziness/ Confusion Unconsciousness | O=1<br>O=2<br>O=3<br>O=4 |      | O=1<br>O=2<br>O=3<br>O=4 |      | O=1<br>O=2<br>O=3<br>O=4 | O=1<br>O=2<br>O=3<br>O=4 | O=1<br>O=2<br>O=3<br>O=4 | O=1<br>O=2<br>O=3<br>O=4 | O=1<br>O=2<br>O=3<br>O=4 | <input type="radio"/> |
| <b>12</b> Blood pressure disorders             | O=1<br>O=2<br>O=3<br>O=4 |      | O=1<br>O=2<br>O=3<br>O=4 |      | O=1<br>O=2<br>O=3<br>O=4 | O=1<br>O=2<br>O=3<br>O=4 | O=1<br>O=2<br>O=3<br>O=4 | O=1<br>O=2<br>O=3<br>O=4 | O=1<br>O=2<br>O=3<br>O=4 | <input type="radio"/> |

Site \_\_\_\_\_ Subarea \_\_\_\_\_ House number \_\_\_\_\_

Interviewer ID \_\_\_\_\_

| Sign/Symptom                                                | Healthcare options       |      |                          |      |                          |                          |                          |                          |                          |            |
|-------------------------------------------------------------|--------------------------|------|--------------------------|------|--------------------------|--------------------------|--------------------------|--------------------------|--------------------------|------------|
|                                                             | Study-HCF                |      | Other HCF                |      | Physician                | Pharmacy                 | Traditional healer       | Nowhere Self-treatment   | Nowhere Nothing          | Don't know |
|                                                             | Rate                     | Code | Rate                     | Code | Rate                     | Rate                     | Rate                     | Rate                     | Rate                     | Code       |
| <b>13</b> Heart disorders                                   | O=1<br>O=2<br>O=3<br>O=4 |      | O=1<br>O=2<br>O=3<br>O=4 |      | O=1<br>O=2<br>O=3<br>O=4 | O=1<br>O=2<br>O=3<br>O=4 | O=1<br>O=2<br>O=3<br>O=4 | O=1<br>O=2<br>O=3<br>O=4 | O=1<br>O=2<br>O=3<br>O=4 | ○          |
| <b>14</b> Nausea Vomitting                                  | O=1<br>O=2<br>O=3<br>O=4 |      | O=1<br>O=2<br>O=3<br>O=4 |      | O=1<br>O=2<br>O=3<br>O=4 | O=1<br>O=2<br>O=3<br>O=4 | O=1<br>O=2<br>O=3<br>O=4 | O=1<br>O=2<br>O=3<br>O=4 | O=1<br>O=2<br>O=3<br>O=4 | ○          |
| <b>15</b> Diarrhea (watery/ bloody/ mucopurulent)           | O=1<br>O=2<br>O=3<br>O=4 |      | O=1<br>O=2<br>O=3<br>O=4 |      | O=1<br>O=2<br>O=3<br>O=4 | O=1<br>O=2<br>O=3<br>O=4 | O=1<br>O=2<br>O=3<br>O=4 | O=1<br>O=2<br>O=3<br>O=4 | O=1<br>O=2<br>O=3<br>O=4 | ○          |
| <b>16</b> Abdominal pain Intestinal pain                    | O=1<br>O=2<br>O=3<br>O=4 |      | O=1<br>O=2<br>O=3<br>O=4 |      | O=1<br>O=2<br>O=3<br>O=4 | O=1<br>O=2<br>O=3<br>O=4 | O=1<br>O=2<br>O=3<br>O=4 | O=1<br>O=2<br>O=3<br>O=4 | O=1<br>O=2<br>O=3<br>O=4 | ○          |
| <b>17</b> Blood loss/ Bleeding (internal)                   | O=1<br>O=2<br>O=3<br>O=4 |      | O=1<br>O=2<br>O=3<br>O=4 |      | O=1<br>O=2<br>O=3<br>O=4 | O=1<br>O=2<br>O=3<br>O=4 | O=1<br>O=2<br>O=3<br>O=4 | O=1<br>O=2<br>O=3<br>O=4 | O=1<br>O=2<br>O=3<br>O=4 | ○          |
| <b>18</b> Blood loss/ Bleeding (external)                   | O=1<br>O=2<br>O=3<br>O=4 |      | O=1<br>O=2<br>O=3<br>O=4 |      | O=1<br>O=2<br>O=3<br>O=4 | O=1<br>O=2<br>O=3<br>O=4 | O=1<br>O=2<br>O=3<br>O=4 | O=1<br>O=2<br>O=3<br>O=4 | O=1<br>O=2<br>O=3<br>O=4 | ○          |
| <b>19</b> Sneezing Runny nose                               | O=1<br>O=2<br>O=3<br>O=4 |      | O=1<br>O=2<br>O=3<br>O=4 |      | O=1<br>O=2<br>O=3<br>O=4 | O=1<br>O=2<br>O=3<br>O=4 | O=1<br>O=2<br>O=3<br>O=4 | O=1<br>O=2<br>O=3<br>O=4 | O=1<br>O=2<br>O=3<br>O=4 | ○          |
| <b>20</b> Cough                                             | O=1<br>O=2<br>O=3<br>O=4 |      | O=1<br>O=2<br>O=3<br>O=4 |      | O=1<br>O=2<br>O=3<br>O=4 | O=1<br>O=2<br>O=3<br>O=4 | O=1<br>O=2<br>O=3<br>O=4 | O=1<br>O=2<br>O=3<br>O=4 | O=1<br>O=2<br>O=3<br>O=4 | ○          |
| <b>21</b> Rapid breathing/ shortness of breath              | O=1<br>O=2<br>O=3<br>O=4 |      | O=1<br>O=2<br>O=3<br>O=4 |      | O=1<br>O=2<br>O=3<br>O=4 | O=1<br>O=2<br>O=3<br>O=4 | O=1<br>O=2<br>O=3<br>O=4 | O=1<br>O=2<br>O=3<br>O=4 | O=1<br>O=2<br>O=3<br>O=4 | ○          |
| <b>22</b> Severe breathing/ Difficulties in breathing       | O=1<br>O=2<br>O=3<br>O=4 |      | O=1<br>O=2<br>O=3<br>O=4 |      | O=1<br>O=2<br>O=3<br>O=4 | O=1<br>O=2<br>O=3<br>O=4 | O=1<br>O=2<br>O=3<br>O=4 | O=1<br>O=2<br>O=3<br>O=4 | O=1<br>O=2<br>O=3<br>O=4 | ○          |
| <b>23</b> Skin inflammation (rashes/ redness/ pus/ itching) | O=1<br>O=2<br>O=3<br>O=4 |      | O=1<br>O=2<br>O=3<br>O=4 |      | O=1<br>O=2<br>O=3<br>O=4 | O=1<br>O=2<br>O=3<br>O=4 | O=1<br>O=2<br>O=3<br>O=4 | O=1<br>O=2<br>O=3<br>O=4 | O=1<br>O=2<br>O=3<br>O=4 | ○          |
| <b>24</b> Swelling/ Edema                                   | O=1<br>O=2<br>O=3<br>O=4 |      | O=1<br>O=2<br>O=3<br>O=4 |      | O=1<br>O=2<br>O=3<br>O=4 | O=1<br>O=2<br>O=3<br>O=4 | O=1<br>O=2<br>O=3<br>O=4 | O=1<br>O=2<br>O=3<br>O=4 | O=1<br>O=2<br>O=3<br>O=4 | ○          |
| <b>25</b> Jaundice                                          | O=1<br>O=2<br>O=3<br>O=4 |      | O=1<br>O=2<br>O=3<br>O=4 |      | O=1<br>O=2<br>O=3<br>O=4 | O=1<br>O=2<br>O=3<br>O=4 | O=1<br>O=2<br>O=3<br>O=4 | O=1<br>O=2<br>O=3<br>O=4 | O=1<br>O=2<br>O=3<br>O=4 | ○          |

Site \_\_\_\_\_ Subarea \_\_\_\_\_ House number \_\_\_\_\_

Interviewer ID \_\_\_\_\_

## FORM 4: ASSESSMENT OF OVERALL, AGE- AND SEX-STRATIFIED GENERIC HEALTHCARE UTILIZATION

### Part B – Healthcare-associated factors/Vaccination/Disease perception

#### TRAVEL HEALTHCARE FACILITY

- 1 In case a healthcare facility (HCF) was rated the 1<sup>st</sup> choice of care in question 4A (fever), what is the main mode of transportation, travel time (depending on mode of transportation), travel cost (depending on mode of transportation) and travel distance (depending on mode of transportation) that is usually taken to get there?**

*Instructions:* Enter one code per category and sex as well as age group only. Skip this question if there is no female/male member <2years/≥2 to <5years/≥5 to <15years/≥15years of age in this household (see also question 2 and 3 of this form PartA). Skip this question if no HCF was rated the 1<sup>st</sup> choice of care in question 4A for female/male member <2years/≥2 to <5years/≥5 to <15years/≥15years of age. Record the travel time as minute(s) [min]/ hour(s) [hr], the total costs in USD, including potential gifts, favours and tips, and the total distance as meter(s) [m]/kilometre(s) [km].

| Female                                                |                |                       |           | Male                     |                |                  |           |
|-------------------------------------------------------|----------------|-----------------------|-----------|--------------------------|----------------|------------------|-----------|
| <2 years                                              | ≥2 to <5 years | ≥5 to <15 years       | ≥15 years | <2 years                 | ≥2 to <5 years | ≥5 to <15 years  | ≥15 years |
| <b>1.1 Transportation mode</b>                        |                |                       |           |                          |                |                  |           |
| Code ____                                             | Code ____      | Code ____             | Code ____ | Code ____                | Code ____      | Code ____        | Code ____ |
| [1] Private transportation (i.e. motorbike, car, bus) |                | [3] Walking           |           | [5] Other, specify _____ |                |                  |           |
| [2] Public transportation (i.e. motorbike, car, bus)  |                | [4] Bicycle           |           | [99] Don't know          |                | [98] No response |           |
| <b>1.2 Travel time</b>                                |                |                       |           |                          |                |                  |           |
| Code ____                                             | Code ____      | Code ____             | Code ____ | Code ____                | Code ____      | Code ____        | Code ____ |
| [1] <30 mins                                          |                | [3] ≥1.0 to <2.0 hrs  |           | [5] ≥3.0 to <4.0 hrs     |                | [99] Don't know  |           |
| [2] ≥30 to <60 mins                                   |                | [4] ≥2.0 to <3.0 hrs  |           | [6] ≥4.0 hrs             |                | [98] No response |           |
| <b>1.3 Travel cost</b>                                |                |                       |           |                          |                |                  |           |
| Code ____                                             | Code ____      | Code ____             | Code ____ | Code ____                | Code ____      | Code ____        | Code ____ |
| [1] <1.0 USD                                          |                | [3] ≥3.0 to <5.0 USD  |           | [5] ≥10.0 USD            |                | [99] Don't know  |           |
| [2] ≥1.0 to <3.0 USD                                  |                | [4] ≥5.0 to <10.0 USD |           |                          |                | [98] No response |           |
| <b>1.4 Travel distance</b>                            |                |                       |           |                          |                |                  |           |
| Code ____                                             | Code ____      | Code ____             | Code ____ | Code ____                | Code ____      | Code ____        | Code ____ |
| [1] <500 m                                            |                | [3] ≥1.0 to <2.0 km   |           | [5] ≥3.0 to <4.0 km      |                | [99] Don't know  |           |
| [2] ≥500 m to <1.0 km                                 |                | [4] ≥2.0 to <3.0 km   |           | [6] ≥4.0 km              |                | [98] No response |           |

#### INSURANCE

- 2 For which members of this household does the insurance cover health expenses?**

*Instructions:* Enter one code per category. Skip this question if there is no member <2years/≥2 to <5years/≥5 to <15years/≥15years of age in this household (see question 2 and 3 of this form PartA).

| <2 years   | ≥2 to <5 years | ≥5 to <15 years | ≥15 years        |
|------------|----------------|-----------------|------------------|
| Code _____ | Code _____     | Code _____      | Code _____       |
| [1] Yes    | [2] No         | [99] Don't know | [98] No response |

Site \_\_\_\_\_ Subarea \_\_\_\_\_ House number \_\_\_\_\_

Interviewer ID \_\_\_\_\_

### 3 What kind of health expenses are usually covered by the insurance for members of this household?

*Instructions:* Enter one code by category and age group only. Skip this question if there is no member <2years/≥2 to <5years/≥5 to <15years/≥15years of age in this household (see also question 2 and 3 of this form PartA). Skip this question if there is no insurance that covers health expenses for <2years/≥2 to <5years/≥5 to <15years/≥15years of age.

|                                                                                | <2 years   | ≥2 to <5years | ≥5 to <15years  | ≥15years         |
|--------------------------------------------------------------------------------|------------|---------------|-----------------|------------------|
|                                                                                | [1] Yes    | [2] No        | [99] Don't know | [98] No response |
| <b>1</b> Registration                                                          | Code _____ | Code _____    | Code _____      | Code _____       |
| <b>2</b> Consultation/ Doctor's visit                                          | Code _____ | Code _____    | Code _____      | Code _____       |
| <b>3</b> Physical examination - general                                        | Code _____ | Code _____    | Code _____      | Code _____       |
| <b>4</b> Physical examination – specific, specify _____                        | Code _____ | Code _____    | Code _____      | Code _____       |
| <b>5</b> Diagnostics - general laboratory diagnostics                          | Code _____ | Code _____    | Code _____      | Code _____       |
| <b>6</b> Diagnostics - specific laboratory diagnostics, specify _____          | Code _____ | Code _____    | Code _____      | Code _____       |
| <b>7</b> Diagnostics - general imaging                                         | Code _____ | Code _____    | Code _____      | Code _____       |
| <b>8</b> Diagnostics - specific imaging, specify _____                         | Code _____ | Code _____    | Code _____      | Code _____       |
| <b>9</b> Diagnostics - other, specify _____                                    | Code _____ | Code _____    | Code _____      | Code _____       |
| <b>10</b> Treatment - general medication                                       | Code _____ | Code _____    | Code _____      | Code _____       |
| <b>11</b> Treatment - specific medication, specify _____                       | Code _____ | Code _____    | Code _____      | Code _____       |
| <b>12</b> Treatment - other medication, specify _____                          | Code _____ | Code _____    | Code _____      | Code _____       |
| <b>13</b> Treatment - interventions (other than surgery), specify _____        | Code _____ | Code _____    | Code _____      | Code _____       |
| <b>14</b> Treatment Surgery                                                    | Code _____ | Code _____    | Code _____      | Code _____       |
| <b>15</b> Hospitalization <7days                                               | Code _____ | Code _____    | Code _____      | Code _____       |
| <b>16</b> Hospitalization ≥7days                                               | Code _____ | Code _____    | Code _____      | Code _____       |
| <b>17</b> Emergency services                                                   | Code _____ | Code _____    | Code _____      | Code _____       |
| <b>18</b> Antenatal care                                                       | Code _____ | Code _____    | Code _____      | Code _____       |
| <b>19</b> Postnatal care                                                       | Code _____ | Code _____    | Code _____      | Code _____       |
| <b>20</b> Preventive medicine                                                  | Code _____ | Code _____    | Code _____      | Code _____       |
| <b>21</b> Vaccination                                                          | Code _____ | Code _____    | Code _____      | Code _____       |
| <b>22</b> Home healthcare (i.e. elderly, disabled, chronic/long-term diseased) | Code _____ | Code _____    | Code _____      | Code _____       |
| <b>23</b> Supportive therapy (i.e. physiotherapy, ergotherapy, rehabilitation) | Code _____ | Code _____    | Code _____      | Code _____       |

Site \_\_\_\_\_ Subarea \_\_\_\_\_ House number \_\_\_\_\_

Interviewer ID \_\_\_\_\_

**ETHNOGRAPHY****4 To which religion/ethnic group/tribe belong members of this household?**

*Instructions:* Give one answer by age group only. Skip this question if there is no member >2years/≥2 to <5years/≥5 to <15years/≥15years of age in this household (see also question 2 and 3 of this form PartA).

|                             | <2 years                                                                    | ≥2 to <5years                                                               | ≥5 to <15years                                                              | ≥15years                                                                    |
|-----------------------------|-----------------------------------------------------------------------------|-----------------------------------------------------------------------------|-----------------------------------------------------------------------------|-----------------------------------------------------------------------------|
| Religion/Ethnic group/Tribe | _____                                                                       | _____                                                                       | _____                                                                       | _____                                                                       |
|                             | <input type="radio"/> 99=Don't know<br><input type="radio"/> 98=No response | <input type="radio"/> 99=Don't know<br><input type="radio"/> 98=No response | <input type="radio"/> 99=Don't know<br><input type="radio"/> 98=No response | <input type="radio"/> 99=Don't know<br><input type="radio"/> 98=No response |

**5 Does the religion/ethnic group/tribe as stated in question 4 influence the various aspects of utilization of healthcare for members of this household?**

*Instructions:* Enter one code by category and age group only. Skip this question if there is member >2years/≥2 to <5years/≥5 to <15years/≥15years of age in this household (see also question 2 and 3 of this form PartA).

|                                                                                              | <2 years   | ≥2 to <5years | ≥5 to <15years  | ≥15years         |
|----------------------------------------------------------------------------------------------|------------|---------------|-----------------|------------------|
|                                                                                              | [1] Yes    | [2] No        | [99] Don't know | [98] No response |
| <b>1</b> Visiting a healthcare facility (i.e. hospital, health care center, health post)     | Code _____ | Code _____    | Code _____      | Code _____       |
| <b>2</b> Visiting a physician                                                                | Code _____ | Code _____    | Code _____      | Code _____       |
| <b>3</b> Visiting a pharmacy                                                                 | Code _____ | Code _____    | Code _____      | Code _____       |
| <b>4</b> Visiting a traditional healer                                                       | Code _____ | Code _____    | Code _____      | Code _____       |
| <b>5</b> Deciding for self-treatment                                                         | Code _____ | Code _____    | Code _____      | Code _____       |
| <b>6</b> Deciding for non-treatment                                                          | Code _____ | Code _____    | Code _____      | Code _____       |
| <b>7</b> Physical examination – general                                                      | Code _____ | Code _____    | Code _____      | Code _____       |
| <b>8</b> Physical examination – specific, specify _____                                      | Code _____ | Code _____    | Code _____      | Code _____       |
| <b>9</b> Collection of specimen (i.e. blood, urine, stool, smear, swab, cerebrospinal fluid) | Code _____ | Code _____    | Code _____      | Code _____       |
| <b>10</b> Diagnostics – general laboratory diagnostics                                       | Code _____ | Code _____    | Code _____      | Code _____       |
| <b>11</b> Diagnostics – specific laboratory diagnostics, specify _____                       | Code _____ | Code _____    | Code _____      | Code _____       |
| <b>12</b> Diagnostics - general imaging                                                      | Code _____ | Code _____    | Code _____      | Code _____       |
| <b>13</b> Diagnostics - specific imaging, specify _____                                      | Code _____ | Code _____    | Code _____      | Code _____       |
| <b>14</b> Diagnostics - other, specify _____                                                 | Code _____ | Code _____    | Code _____      | Code _____       |
| <b>15</b> Treatment - general medication                                                     | Code _____ | Code _____    | Code _____      | Code _____       |
| <b>16</b> Treatment - specific medication, specify _____                                     | Code _____ | Code _____    | Code _____      | Code _____       |
| <b>17</b> Treatment - other medication, specify _____                                        | Code _____ | Code _____    | Code _____      | Code _____       |



Site \_\_\_\_\_ Subarea \_\_\_\_\_ House number \_\_\_\_\_

Interviewer ID \_\_\_\_\_

|                                                                                |            |            |            |            |
|--------------------------------------------------------------------------------|------------|------------|------------|------------|
| <b>18</b> Treatment - interventions (other than surgery), specify _____        | Code _____ | Code _____ | Code _____ | Code _____ |
| <b>19</b> Treatment - Surgery                                                  | Code _____ | Code _____ | Code _____ | Code _____ |
| <b>20</b> Hospitalization <7days                                               | Code _____ | Code _____ | Code _____ | Code _____ |
| <b>21</b> Hospitalization ≥7days                                               | Code _____ | Code _____ | Code _____ | Code _____ |
| <b>22</b> Emergency services                                                   | Code _____ | Code _____ | Code _____ | Code _____ |
| <b>23</b> Antenatal care                                                       | Code _____ | Code _____ | Code _____ | Code _____ |
| <b>24</b> Postnatal care                                                       | Code _____ | Code _____ | Code _____ | Code _____ |
| <b>25</b> Preventive medicine                                                  | Code _____ | Code _____ | Code _____ | Code _____ |
| <b>26</b> Vaccination                                                          | Code _____ | Code _____ | Code _____ | Code _____ |
| <b>27</b> Home healthcare (i.e. elderly, disabled, chronic/long-term diseased) | Code _____ | Code _____ | Code _____ | Code _____ |
| <b>28</b> Supportive therapy (i.e. physiotherapy, ergotherapy, rehabilitation) | Code _____ | Code _____ | Code _____ | Code _____ |

**VACCINATION**

**6 How were children of this household fed during the first six months of life?**

*Instructions:* Skip this question if there are no male/female children in this household (see also question 2 and 3 of this form PartA).

- 1=Breastfed exclusively
- 2=Breastfed and other feeds, specify \_\_\_\_\_
- 3=Formula and other feeds, specify \_\_\_\_\_
- 4=Breastfed and formula
- 5=Formula exclusively
- 6=Other, specify \_\_\_\_\_
- 99=Don't know
- 98=No response

**7 Which water source was usually used to prepare formula or formula and other feeds as stated in question 6 for children of this household?**

*Instructions:* Skip this question if there are no children in this household (see also question 2 and 3 of this form PartA).

- 1=Tap water (inside the house; private)
- 2=Tap water (outside the house i.e. back-/courtyard; private)
- 3=Tap water (outside the house; public, shared)
- 4=Standpipe/Piped water (inside the house; private)
- 5=Standpipe/Piped water (outside the house i.e. back-/courtyard; private)
- 6=Standpipe/Piped water (outside the house; public, shared)
- 7=Water truck (public; shared)
- 8=Bottled water
- 9=Surface water (i.e. lake, pond, river, stream)
- 10=Surface water (i.e. canal, irrigation canal)
- 11=Spring water
- 12=Rain water
- 13=Well/Borehole (open/uncovered/unprotected)
- 14=Well/Borehole (covered/protected)
- 15=NO FORMULA/OTHER FEEDS PREPARED
- 16=Other, specify \_\_\_\_\_
- 99=Don't know
- 98=No response

**8 Did children of this household receive any vaccines since birth, including the birth vaccines?**

*Instructions:* Enter one code by category and child only. Skip this question if there are no children in this household (see also question 2 and 3 of this form PartA). Refer to question 9 of "Form 3 Part A – Demographic data/General household information" and record the initials/identifier of the member(s).

|                                       |                                       |                                       |                                       |
|---------------------------------------|---------------------------------------|---------------------------------------|---------------------------------------|
| Child 1<br>Initials/Identifier: _____ | Child 2<br>Initials/Identifier: _____ | Child 3<br>Initials/Identifier: _____ | Child 4<br>Initials/Identifier: _____ |
|---------------------------------------|---------------------------------------|---------------------------------------|---------------------------------------|

Site \_\_\_\_\_ Subarea \_\_\_\_\_ House number \_\_\_\_\_

Interviewer ID \_\_\_\_\_

|                                                                                                                                                     |                                       |                              |                  |
|-----------------------------------------------------------------------------------------------------------------------------------------------------|---------------------------------------|------------------------------|------------------|
| [1] YES, vaccinated                                                                                                                                 | [5] No, lack of vaccine               | [9] No, HCF busy             |                  |
| [2] No, caretaker busy                                                                                                                              | [6] No, child too old/young           | [10] No, child sick          |                  |
| [3] No, caretaker decided no need                                                                                                                   | [7] No, caretaker refused/too worried | [11] No, no vaccination card |                  |
| [4] No, unknown where to go                                                                                                                         | [8] No, other, specify _____          | [99] Don't know              | [98] No response |
| <b>8.1 Diphtheria and Tetanus and Pertussis and <i>Haemophilus influenza</i> and Hepatitis B vaccine/DTwPHibHepB</b> (e.g. 6/8, 10/12, 14/16 weeks) |                                       |                              |                  |
| Code _____                                                                                                                                          | Code _____                            | Code _____                   | Code _____       |
| <b>8.2 Tetanus toxoid (TT)</b> (e.g. 1st contact pregnancy, 1, 6, 12/24 months)                                                                     |                                       |                              |                  |
| Code _____                                                                                                                                          | Code _____                            | Code _____                   | Code _____       |
| <b>8.3 Tetanus and diphtheria toxoid (TD)</b> (e.g. 1st contact pregnancy, 1, 6, 12 months)                                                         |                                       |                              |                  |
| Code _____                                                                                                                                          | Code _____                            | Code _____                   | Code _____       |
| <b>8.4 Tuberculosis/BCG</b> (at birth)                                                                                                              |                                       |                              |                  |
| Code _____                                                                                                                                          | Code _____                            | Code _____                   | Code _____       |
| <b>8.5 Rotavirus/RV</b> (e.g. 6/8, 10/12, 16 weeks)                                                                                                 |                                       |                              |                  |
| Code _____                                                                                                                                          | Code _____                            | Code _____                   | Code _____       |
| <b>8.6 Measles/Measles and Rubella (MR)</b> (e.g. 9, 15/18months)                                                                                   |                                       |                              |                  |
| Code _____                                                                                                                                          | Code _____                            | Code _____                   | Code _____       |
| <b>8.7 Polio/OPV</b> (e.g. birth, 6/8, 10/12, 14/16 weeks)                                                                                          |                                       |                              |                  |
| Code _____                                                                                                                                          | Code _____                            | Code _____                   | Code _____       |
| <b>8.8 Pneumococcus/PCV</b> (e.g. 6/8, 10/12, 14/16 weeks)                                                                                          |                                       |                              |                  |
| Code _____                                                                                                                                          | Code _____                            | Code _____                   | Code _____       |
| <b>8.9 Yellow fever (YF)</b> (e.g. 9 months)                                                                                                        |                                       |                              |                  |
| Code _____                                                                                                                                          | Code _____                            | Code _____                   | Code _____       |
| <b>8.10 Other Vaccines</b>                                                                                                                          |                                       |                              |                  |
| Specify, _____                                                                                                                                      | Specify, _____                        | Specify, _____               | Specify, _____   |
| Specify, _____                                                                                                                                      | Specify, _____                        | Specify, _____               | Specify, _____   |
| Specify, _____                                                                                                                                      | Specify, _____                        | Specify, _____               | Specify, _____   |
| Specify, _____                                                                                                                                      | Specify, _____                        | Specify, _____               | Specify, _____   |

Site \_\_\_\_\_ Subarea \_\_\_\_\_ House number \_\_\_\_\_ Interviewer ID \_\_\_\_\_

### **DISEASE PERCEPTION**

#### **9 Knowledge, perception, causes and prevention of common infectious diseases**

| <b>Disease</b>          | <b>9.1 Disease known by household members?</b><br>[1] Yes<br>[2] No<br>[99] Don't know<br>[98] No response | <b>9.2 Perception of disease by household members?</b><br><i>Instruction: Describe briefly if known.</i> | <b>9.3 Causes for disease known by household members?</b><br><i>Instructions: Enter all codes (list A) that apply; more than one answer is possible.</i> | <b>9.4 Measures to prevent disease known by household members?</b><br><i>Instructions: Enter all codes (list B) that apply; more than one answer is possible.</i> | <b>9.5 Measures to prevent disease utilized by household members?</b><br><i>Instructions: Enter all codes (list B) that apply; more than one answer is possible.</i> |
|-------------------------|------------------------------------------------------------------------------------------------------------|----------------------------------------------------------------------------------------------------------|----------------------------------------------------------------------------------------------------------------------------------------------------------|-------------------------------------------------------------------------------------------------------------------------------------------------------------------|----------------------------------------------------------------------------------------------------------------------------------------------------------------------|
| <b>A. Typhoid fever</b> | Code _____                                                                                                 |                                                                                                          | Code _____                                                                                                                                               | Code _____                                                                                                                                                        | Code _____                                                                                                                                                           |
| <b>B. Cholera</b>       | Code _____                                                                                                 |                                                                                                          | Code _____                                                                                                                                               | Code _____                                                                                                                                                        | Code _____                                                                                                                                                           |
| <b>C. Malaria</b>       | Code _____                                                                                                 |                                                                                                          | Code _____                                                                                                                                               | Code _____                                                                                                                                                        | Code _____                                                                                                                                                           |
| <b>D. Influenza</b>     | Code _____                                                                                                 |                                                                                                          | Code _____                                                                                                                                               | Code _____                                                                                                                                                        | Code _____                                                                                                                                                           |
| <b>E. Meningitis</b>    | Code _____                                                                                                 |                                                                                                          | Code _____                                                                                                                                               | Code _____                                                                                                                                                        | Code _____                                                                                                                                                           |
| <b>F. Hepatitis E</b>   | Code _____                                                                                                 |                                                                                                          | Code _____                                                                                                                                               | Code _____                                                                                                                                                        | Code _____                                                                                                                                                           |
| <b>G. Tuberculosis</b>  | Code _____                                                                                                 |                                                                                                          | Code _____                                                                                                                                               | Code _____                                                                                                                                                        | Code _____                                                                                                                                                           |
| <b>H. HIV/AIDS</b>      | Code _____                                                                                                 |                                                                                                          | Code _____                                                                                                                                               | Code _____                                                                                                                                                        | Code _____                                                                                                                                                           |

| <b>List A: Possible causes</b>                                                                | <b>List B: Possible preventive measures</b>                                                                                                                       |
|-----------------------------------------------------------------------------------------------|-------------------------------------------------------------------------------------------------------------------------------------------------------------------|
| [1] Alcohol consumption<br>[2] Weather/witchcraft<br>[3] Mosquito/insect bite<br>[4] Dog bite | [1] No alcohol consumption<br>[2] Sleeping under bed net<br>[3] Using mosquito/insect spray<br>[4] Maintain a clean house and immediate surroundings of the house |

Site \_\_\_\_\_ Subarea \_\_\_\_\_ House number \_\_\_\_\_ Interviewer ID \_\_\_\_\_

|                                                                                                      |                                                                                                                              |
|------------------------------------------------------------------------------------------------------|------------------------------------------------------------------------------------------------------------------------------|
| [5] Drinking untreated surface/spring water (i.e. lake, pond, river, stream, canal/irrigation canal) | [5] Practice proper disposal of human and domestic waste                                                                     |
| [6] Close body contact/kissing/hugging                                                               | [6] Avoiding close contact to dogs                                                                                           |
| [7] Eating raw food items such as vegetables/lettuce, fruits, dairy products, eggs, meat or fish     | [7] Treating water (i.e. boiling, filtration, solar disinfection, sedimentation, chlorination)                               |
| [8] Not cleaning hands properly when preparing food/meals                                            | [8] Not cooking/preparing food/meals with untreated water                                                                    |
| [9] Not cleaning hands properly before/after visiting a toilet                                       | [9] Not washing food items to be consumed raw with untreated water                                                           |
| [10] Contact to human blood (i.e. injection, transfusion, surgery)                                   | [10] Re-boiling/re-heating left-over/prepared food/meals prior to consumption                                                |
| [11] Consuming raw animal blood                                                                      | [11] Not eating raw food items such as vegetables/lettuce, fruits, dairy products, eggs, meat or fish                        |
| [12] Other, specify _____                                                                            | [12] Cover food items/meals                                                                                                  |
| [99] Don't know                                                                                      | [13] Protect food items/meals from flies                                                                                     |
| [98] No response                                                                                     | [14] Avoid food/beverage from street vendors                                                                                 |
|                                                                                                      | [15] Avoid close contact to sick people                                                                                      |
|                                                                                                      | [16] No close body contact/kissing/hugging                                                                                   |
|                                                                                                      | [17] Covering nose/mouth while sneezing/coughing                                                                             |
|                                                                                                      | [18] No contact/consumption of human/animal blood                                                                            |
|                                                                                                      | [19] Practicing proper hand hygiene when preparing food/meals (i.e. washing hands with soap and water, rub hands clean)      |
|                                                                                                      | [20] Practicing proper hand hygiene before/after visiting a toilet (i.e. washing hands with soap and water, rub hands clean) |
|                                                                                                      | [21] Other, specify _____                                                                                                    |
|                                                                                                      | [99] Don't know                                                                                                              |
|                                                                                                      | [98] No response                                                                                                             |

Peer review only

Site \_\_\_\_\_ Subarea \_\_\_\_\_ House number \_\_\_\_\_

Interviewer ID \_\_\_\_\_

**10 For which members of this household are the preventive measures as listed in question 9.5 against typhoid fever used?***Instructions:* Tick all that applies; more than one answer is possible.

- 1=<2years       3= $\geq$ 5 to <15years       5=NOT USED       99=Don't know  
 2= $\geq$ 2 to < 5years       4= $\geq$ 15years       98=No response

**11 Name the household members that were diagnosed with typhoid fever during the past 3 months. Which diagnostics were used to confirm typhoid fever?***Instructions:* Enter all codes that apply for each household member; more than one answer is possible.

| Member 1<br>Initials/Identifier: _____ | Member 2<br>Initials/Identifier: _____ | Member 3<br>Initials/Identifier: _____                | Member 4<br>Initials/Identifier: _____ |
|----------------------------------------|----------------------------------------|-------------------------------------------------------|----------------------------------------|
| [1] Blood culture                      | [3] Blood/Widal test                   | [5] Not applicable (not diagnosed with typhoid fever) |                                        |
| [2] Stool culture                      | [4] Other test, specify _____          | [99] Don't know                                       | [98] No response                       |
| Code _____                             | Code _____                             | Code _____                                            | Code _____                             |

**12 (Where were members of this household recorded in question 11 diagnosed for typhoid fever?) Where did members of this household seek care?***Instructions:* Enter one code by household member only.

| Member 1<br>Initials/Identifier: _____ | Member 2<br>Initials/Identifier: _____ | Member 3<br>Initials/Identifier: _____ | Member 4<br>Initials/Identifier: _____ |
|----------------------------------------|----------------------------------------|----------------------------------------|----------------------------------------|
| [1] Healthcare facility, specify _____ | [6] Nowhere, did not seek care         |                                        |                                        |
| [2] Physician                          | [7] Other, specify _____               |                                        |                                        |
| [3] Nowhere, self-treatment            | [8] Not applicable                     |                                        |                                        |
| [4] Traditional healer                 | [99] Don't know                        |                                        |                                        |
| [5] Pharmacy                           | [98] No response                       |                                        |                                        |
| Code _____                             | Code _____                             | Code _____                             | Code _____                             |

**13 (Did members of this household that were diagnosed with typhoid fever as recorded in question 11 get any treatment?) Which treatment did they get?***Instructions:* Tick one answer by household member only.

| Member 1<br>Initials/Identifier: _____           | Member 2<br>Initials/Identifier: _____           | Member 3<br>Initials/Identifier: _____           | Member 4<br>Initials/Identifier: _____           |
|--------------------------------------------------|--------------------------------------------------|--------------------------------------------------|--------------------------------------------------|
| <input type="radio"/> 1=Treatment, specify _____ | <input type="radio"/> 1=Treatment, specify _____ | <input type="radio"/> 1=Treatment, specify _____ | <input type="radio"/> 1=Treatment, specify _____ |
| <input type="radio"/> 2=Not applicable           | <input type="radio"/> 2=Not applicable           | <input type="radio"/> 2=Not applicable           | <input type="radio"/> 2=Not applicable           |
| <input type="radio"/> 99=Don't know              | <input type="radio"/> 99=Don't know              | <input type="radio"/> 99=Don't know              | <input type="radio"/> 99=Don't know              |
| <input type="radio"/> 98=No response             | <input type="radio"/> 98=No response             | <input type="radio"/> 98=No response             | <input type="radio"/> 98=No response             |

Site \_\_\_\_\_ Subarea \_\_\_\_\_ House number \_\_\_\_\_

Interviewer ID \_\_\_\_\_

## FORM 5: ASSESSMENT OF OVERALL, AGE-AND SEX-STRATIFIED ACTUAL HEALTHCARE UTILIZATION

### HEALTHCARE SEEKING BEHAVIOR

**1 Record below any occurrence of a sign(s)/ a symptom(s) (see List 1) and specify where (see List 2) and how often a member/members sought healthcare during the past 3 months?**

*Instructions:* See "Form 3 - Part A - GENERAL HOUSEHOLD INFORMATION" to obtain the initials/identifier of each household member. Indicate one sign/symptom per line only. Start a new line if different healthcare options were selected for recurring signs/symptoms. Indicate the number of occurrences for each sign/symptom during the past 3 months. If a different healthcare option was taken for a recurring sign/symptom, indicate this on a new line. Please complete an additional form if >20 occurrences took place during the past 3 months.

| List 1:<br>Sign/Symptom                                                                                                                                                                                                                                                                                                                                         | List 2:<br>Healthcare option                                                                                                                                                                                                                                                                                                                                                                                                    |
|-----------------------------------------------------------------------------------------------------------------------------------------------------------------------------------------------------------------------------------------------------------------------------------------------------------------------------------------------------------------|---------------------------------------------------------------------------------------------------------------------------------------------------------------------------------------------------------------------------------------------------------------------------------------------------------------------------------------------------------------------------------------------------------------------------------|
| [A] Fever, any<br>[B] Fever <3days (continuous)<br>[C] Fever ≥3days (continuous)<br>[D] Chills/ Shivering<br>[E] Convulsion<br>[F] Weight loss<br>[G] Dehydration<br>[H] Malaise/ Weakness/ Fatigue<br>[I] Aches/Pain (muscle/joint/bone)<br>[J] Headache<br>[K] Dizziness/Confusion/<br>Unconsciousness<br>[L] Blood pressure disorders<br>[M] Heart disorders | [N] Nausea/ Vomiting<br>[O] Diarrhea (watery/bloody/mucopurulent)<br>[P] Abdominal pain/ Intestinal pain<br>[Q] Blood loss/ Bleeding (internal)<br>[R] Blood loss/ Bleeding (external)<br>[S] Sneezing/ Runny nose<br>[T] Cough<br>[U] Rapid breathing/ Shortness of breath<br>[V] Severe breathing/ Difficulties in breathing<br>[W] Skin inflammation (rashes/redness/<br>pus/itching)<br>[X] Swelling/ Edema<br>[Y] Jaundice |
|                                                                                                                                                                                                                                                                                                                                                                 | [1] Study-HCF,<br>Code _____<br>[2] Other HCF,<br>Code _____<br>[3] Physician<br>[4] Pharmacy<br>[5] Traditional healer<br>[6] Nowhere/Self-<br>treatment<br>[7] Nowhere/Nothing                                                                                                                                                                                                                                                |

| No. | Household member<br>Record the initials/identifier of a household member; see "Form 3 - Part A - GENERAL HOUSEHOLD INFORMATION" | Sign/<br>Symptom<br>Use List 1 to select a code | Healthcare option           |          | Frequency<br>Indicate the number of incidences for the sign/symptom listed |
|-----|---------------------------------------------------------------------------------------------------------------------------------|-------------------------------------------------|-----------------------------|----------|----------------------------------------------------------------------------|
|     |                                                                                                                                 |                                                 | Use List 2 to select a code | HCF code |                                                                            |
| 1   |                                                                                                                                 |                                                 |                             |          |                                                                            |
| 2   |                                                                                                                                 |                                                 |                             |          |                                                                            |
| 3   |                                                                                                                                 |                                                 |                             |          |                                                                            |
| 4   |                                                                                                                                 |                                                 |                             |          |                                                                            |
| 5   |                                                                                                                                 |                                                 |                             |          |                                                                            |
| 6   |                                                                                                                                 |                                                 |                             |          |                                                                            |
| 7   |                                                                                                                                 |                                                 |                             |          |                                                                            |
| 8   |                                                                                                                                 |                                                 |                             |          |                                                                            |
| 9   |                                                                                                                                 |                                                 |                             |          |                                                                            |

Site \_\_\_\_\_ Subarea \_\_\_\_\_ House number \_\_\_\_\_ Interviewer ID \_\_\_\_\_

|    |  |  |  |  |  |
|----|--|--|--|--|--|
| 10 |  |  |  |  |  |
| 11 |  |  |  |  |  |
| 12 |  |  |  |  |  |
| 13 |  |  |  |  |  |
| 14 |  |  |  |  |  |
| 15 |  |  |  |  |  |
| 16 |  |  |  |  |  |
| 17 |  |  |  |  |  |
| 18 |  |  |  |  |  |
| 19 |  |  |  |  |  |
| 20 |  |  |  |  |  |

For peer review only

1  
2  
3  
4  
5  
6  
7  
8  
9  
10  
11  
12  
13  
14  
15  
16  
17  
18  
19  
20  
21  
22  
23  
24  
25  
26  
27  
28  
29  
30  
31  
32  
33  
34  
35  
36  
37  
38  
39  
40  
41  
42  
43  
44  
45  
46  
47  
48  
49  
50  
51  
52  
53  
54  
55  
56  
57  
58  
59  
60

### Appendix 3/Supplementary file 3: Protocol, Definitions/Terminology and Study Forms (French)

#### Protocol

#### Le protocole d'étude HPAfrica: Évaluation du comportement de santé et des facteurs démographiques socio-économiques, comportement d'hygiène - une étude standardisée répétée transversale dans plusieurs cohortes en Afrique subsaharienne

#### Abstract

**Introduction** L'objectif de l'étude HPAfrica est de déterminer les comportements sanitaires et ~~autres~~ facteurs démographiques, y compris les facteurs socio-économiques, ethnographiques aussi bien que d'hygiène et d'assainissement, sur les sites d'étude du programme Fièvre Typhoïde Sévère en Afrique (SETA). L'objectif du programme SETA est d'enquêter sur la surveillance de la fièvre au niveau des établissements de soins de santé au Burkina Faso, en République Démocratique du Congo, en Éthiopie, au Ghana, à Madagascar et au Nigéria. Les estimations précises de la charge de morbidité nécessitent un ajustement des styles de comportements de santé, qui sont supposés varier au sein d'une population d'étude.

**Methodes et Analyses** Pour la taille d'échantillon minimale d'interviews de ménages requise, les hypothèses d'une population infinie, d'un effet de design et d'une stratification par âge et par sexe sont considérées. En l'absence d'un cadre d'échantillonnage de la population ou d'une liste de ménages, une approche géospatiale sera utilisée pour générer des points aléatoires géographiques avec un outil ArcGIS (Aeronautical Reconnaissance Coverage Geographic Information System). Les impressions de l'imagerie satellite de Google Earth Pro® visualisent ces points. Les données d'intérêt seront évaluées au niveau des ménages en différentes saisons en appliquant un échantillonnage simple, stratifié en fonction de la population. Une application basée sur Android et un service Web ont été mis au point sera développé pour la capture de données électroniques et la synchronisation avec le serveur de base de données sur Internet en temps réel. Les poids d'échantillonnage seront calculés pour tenir compte des différences possibles dans les probabilités de sélection. Des analyses de données descriptives seront effectuées afin d'évaluer l'informations de base de chaque population étudiée et le comportement santé stratifié par âge et par sexe. Ceci permettra d'ajuster les estimations de la charge de morbidité. En outre, des analyses multivariées seront appliquées pour examiner les associations entre le comportement santé, les facteurs démographiques et le fardeau de la maladie trouvée dans l'étude SETA.

#### Les forces et les limites de cette étude

- La normalisation dans la recherche multi-pays /-site à base communautaire nécessite de la prudence compte tenu des variations de cadre, de langue et de culture.
- Les évaluations de santé publique à grande échelle complèteront les données sur la charge de morbidité en étudiant les sources de transmission et d'infection.
- Les données de population actuelles dans les sites d'étude et leurs sous-zones définies administrativement et les bases de sondage de population sont supposées être limitées.
- La collecte de données électroniques peut entraîner problèmes techniques liés aux dommages, aux pannes fonctionnelles ou à la perte de dispositifs.
- Une connexion Internet sans fil instable peut limiter les équipes de données à mettre à jour l'application basée sur Android, communiquer en temps réel avec les responsables de l'étude et à synchroniser les données collectées avec le serveur.

**Inscription:** non requise

**Mots clés:** comportement santé/hygiénique, assainissement, socio-économique, cadre d'échantillonnage de la population/l'échantillonnage sélection aléatoire ~~géospatiale~~, Afrique subsaharienne, HPAfrica étude



## Contexte

L'évaluation du comportement de santé, y compris l'utilisation des soins de santé, est un déterminant important pour la production d'estimations précises du fardeau de la maladie parmi les populations cibles. Ceci est particulièrement important pour les études qui utilisent un modèle de surveillance observationnelle basé sur les établissements de santé, car une variation substantielle des comportements de santé influence fortement les estimations de la maladie (1). L'ajustement des calculs de la maladie pour des variations du comportement de santé augmentera l'exactitude de l'évaluation des mesures la prévalence des maladies de la fréquence des maladies causées par des pathogènes bactériens, fongiques, viraux ou parasitaires parmi les populations étudiées. De plus, l'influence d'une grande variété de facteurs basés sur la population sur le comportement de santé et le fardeau de la maladie a été reconnue. Cela inclut des facteurs socioéconomiques tels que l'éducation, la profession, le revenu, la disponibilité des biens des ménages (2, 3), les facteurs ethniques / religieux et culturels (4, 5), mais aussi l'hygiène et l'assainissement (6-10), la manipulation des aliments (11-14) et les contacts avec des animaux (9).

L'étude **Health Population Africa** (HPAfrica) sera menée au Burkina Faso, en République démocratique du Congo (RDC), en Éthiopie, au Ghana, à Madagascar et au Nigéria. Les expériences du programme Typhoid Fever Surveillance in Africa Program (TSAP) seront reportées sur le programme Severe Typhoid in Africa (SETA) (15, 16). Dans ce programme, une surveillance standardisée de la fièvre, basée sur les établissements de santé, est effectuée sur des sites d'étude sélectionnés dans les pays participants sur une période de deux ans (17). SETA vise principalement à collecter systématiquement des informations sur le fardeau des infections graves à *Salmonella*. Les sujets vivant dans la zone de chalandise définie, avec un épisode de fièvre aiguë, des antécédents de fièvre  $\geq 3$  jours consécutifs, une fièvre typhoïde cliniquement soupçonnée ou des perforations gastro-intestinales cliniquement diagnostiquées dues à la fièvre typhoïde seront éligibles. En outre, la sévérité des maladies provoquées par *Salmonella* et l'histoire naturelle de l'infection à *Salmonella* seront enregistrées avec des analyses supplémentaires sur les réponses immunitaires de l'hôte et le portage chronique.

## Objectifs et Résultats

L'objectif de l'étude HPAfrica est d'évaluer le comportement de santé générique et réel stratifié par âge et par sexe. Le comportement générique se rapporte au comportement associé à la fièvre et à d'autres signes et symptômes sans l'apparition, alors que le comportement réel est lié à l'apparition (Formulaire 4 Partie A, Formulaire 5). Les données sont utilisées pour ajuster les mesures de l'occurrence de la maladie comme l'incidence d'agents pathogènes infectieux stratifiés selon l'âge et le sexe pour la proportion d'une population étudiée non capturée ~~par les activités de HPAfrica dans le programme de surveillance SETA~~. Les données documentaires pour divers signes et symptômes ou une combinaison de ceux-ci sont utilisés pour une classification progressive de l'utilisation des soins de santé en fonction de la gravité de la maladie.

L'étude HPAfrica recueillera des données sur les facteurs associés aux soins de santé, tels que les modalités de voyage, la possession d'une assurance maladie, les facteurs culturels/ethnographiques, l'état vaccinal des enfants (18, 19) et la fréquence et la perception individuelle des maladies (Formulaire 4 Partie B). Les données démographiques (Formulaire 3 Partie A) seront utilisées pour la stratification par âge et par sexe de la population étudiée qui est nécessaire pour calculer les facteurs d'ajustement pour les incidences mesures de l'occurrence de la maladie. Les données socio-économiques (Formulaire 3 Partie B) seront utilisées pour calculer les indices de richesse pour les approches descriptives et analytiques ~~des populations étudiées~~. Les informations sur l'hygiène et l'assainissement (Formulaire 3 Partie C) peuvent permettre une meilleure compréhension de l'occurrence et de la fréquence des agents pathogènes identifiés parmi les populations étudiées.

## Méthodes

### Sites d'étude

Les limites de chaque site seront définies en utilisant des indications préexistantes qui avaient été déterminées par les autorités statistiques ou ministères de la santé (Tableau 1), couplées à des données géospatiales à haute résolution de source ouverte. L'examen rétrospectif des registres de des deux dernières années aux établissements de soins de santé de recrutement SETA permettra de redéfinir les limites du site. On s'attend à ce que cette revue révèle les résidences ou au moins les zones résidentielles administratives plus larges telles que des communautés, des districts ou des villages de patients qui ont cherché des soins de santé pour une raison quelconque. Des cartes et des images satellites peuvent être utilisées pour mieux visualiser les résidences des patients et les limites générales, y compris les sous-zones définies géographiquement ou administrativement, les secteurs de recensement ou les strates de chaque site. Là où les limites ne peuvent être clairement définies, des facteurs supplémentaires, tels que la distance à un établissement de soins de santé de recrutement, peuvent être pris en compte.

### Taille d'échantillons

Toutes les sources disponibles seront utilisées pour recueillir des données sur la population le plus à jour stratifiées selon l'âge et le sexe par site d'étude et par les sous-zones définies administrativement ou géographiquement ou les strates. Cela peut inclure les dernières informations démographiques issues d'un recensement d'une total de la population ou d'un DSS (Demographic Surveillance System) / HDSS (Health and Demographic Surveillance System). Les chiffres sommaires sur la population et les facteurs de croissance de la population, s'ils sont disponibles, ainsi que les outils d'échantillonnage en accès libre couplés à des sources de données sur la population, comme les données sur la population quadrillée basées sur la densité, peuvent également être utilisés (20-24).

Toutes les strates par site d'étude seront incluses. Un ménage tel que défini pour l'étude HPAfrica constitue l'unité d'échantillonnage primaire (PSU). Le nombre minimum de ménages sélectionnés au hasard sera calculé en utilisant l'équation basée de précision (équation-I) en supposant une population infinie et en considérant un effet de design (DEFF) (25-27), y compris les hypothèses qui l'accompagnent:

#### Equation-I: Calcul de la taille d'échantillon basé sur la précision par site d'étude pour une population infinie (20-23):

$$n_0 = DEFF \cdot \left[ z^2_{1-\alpha/2} \cdot \frac{4 \cdot p \cdot (1-p)}{d^2} \right]$$

#### Hypothèses d'Equation-I

|                          |                                                                                                                                                                                                                                                                                                                                        |
|--------------------------|----------------------------------------------------------------------------------------------------------------------------------------------------------------------------------------------------------------------------------------------------------------------------------------------------------------------------------------|
| $n_0$                    | Nombre minimum <u>total</u> de ménages à interroger dans une zone d'étude en supposant une population infinie                                                                                                                                                                                                                          |
| $DEFF$                   | Effect de design; fixé à 1.5<br><u><math>\leq 1.0</math>=negative correlation of the outcome(s) of interest between household members; <math>1.0</math>=no correlation of the outcome(s) of interest between household members; <math>\geq 1.0</math>=positive correlation of the outcome(s) of interest between household members</u> |
| $z_{1-\frac{\alpha}{2}}$ | Déviante Standard correspondant à un intervalle de confiance de 95% (1.96 pour alpha de 0.05)                                                                                                                                                                                                                                          |
| $d$                      | Précision (erreur acceptable); estimation de point; fixé à 0.2                                                                                                                                                                                                                                                                         |
| $p$                      | Proportion de la population de l'étude devant se rendre dans un établissement de soins de santé de recrutement pour des conditions associées à de la fièvre et d'autres signes et symptômes (proportion capturée); fixé à 0.2                                                                                                          |
| $1-p$                    | Proportion de la population de l'étude ne devant se rendre dans un établissement de soins de santé de recrutement pour des conditions associées à de la fièvre et d'autres signes et symptômes (proportion non capturée)                                                                                                               |

L'effet de design est défini comme est un facteur d'ajustement pour le regroupement naturel des comportements de santé comme principal résultat d'intérêt parmi les au sein des membres du ménage. Il rend compte d'une plus grande variance statistique et, par conséquent, d'une plus faible précision par rapport à l'échantillonnage aléatoire simple (25, 29, 32, 33). Pour HPAfrica, le DEFF peut être fixé de manière conservatrice à 1,5 sur la base d'une estimation de 1,42 résultant d'une taille moyenne de

ménage de sept et d'un coefficient de corrélation intracluster (ICC) de 0,07 provenant de l'étude TSAP (15, 30, 31, 34). Une proportion  $p$  de 0,2 pourra être considérée si aucune autre estimation n'est disponible ou  $p$  peut être basé sur des informations plus précises disponibles par site ou  $p$  pourra être basé ou sur les expériences au cours de l'étude TSAP (Tableau 2): Madagascar, Isotry :  $p=0,01$ , Burkina Faso, Polesgo:  $p=0,9$  (3526). Combiner tous les hypothèses dans l'équation-I va avoir pour résultat un nombre global minimum ( $n_0$ ) de 92 ménages à interroger par à chaque site.

En outre,  $n_0$  pourra être pris en compte pour la répartition par âge et par sexe de chaque population de l'étude représentée par  $q\hat{p}$ , la proportion minimum supposée de stratification par groupe d'âge (<5 ans, ≥5 à <15 ans, ≥15 ans). Le facteur  $q\hat{p}$  pourra être défini de façon arbitraire à 0,2 ou être basé sur les expériences précédentes: Éthiopie, Butajira :  $q\hat{p}=0,09$ , Burkina Faso, Polesgo :  $q\hat{p}=0,23$  (15). Appliquer  $q\hat{p}$  à l'Equation-I pour une distribution binomiale, y compris ses postulats connexes, aura pour résultat le nombre minimum de ménages à interroger ( $\bar{n}_0$ ) de 461 stratifié selon l'âge (Equation-II):

**Equation-II: Calcul de la taille d'échantillon basé sur la précision par site d'étude pour une population infinie avec stratification selon l'âge et population-poids par sous-zone ou strate:**

$$\bar{n}_0 = \left( DEFF \cdot \left[ z^2_{1-\frac{\alpha}{2}} \cdot \frac{4 \cdot p \cdot (1-p)}{d^2} \right] \right) / q \quad \bar{n}_{ow} = \bar{n}_0 \cdot (n/N)$$

#### Hypothèses d'Equation-II

|                          |                                                                                                                                                                                                                               |
|--------------------------|-------------------------------------------------------------------------------------------------------------------------------------------------------------------------------------------------------------------------------|
| $\bar{n}_0$              | Nombre <b>total</b> minimum de ménages à interroger dans une zone d'étude en supposant une population infinie et une stratification selon l'âge                                                                               |
| $\bar{n}_{ow}$           | <u>Minimum number of households to be interviewed by subarea or stratum</u>                                                                                                                                                   |
| $n/N$                    | <u>Population size of subarea or stratum divided by the population size of the total study area</u>                                                                                                                           |
| DEFF                     | Effect de design; fixé à 1.5                                                                                                                                                                                                  |
| $z_{1-\frac{\alpha}{2}}$ | Déviation Standard correspondant à un intervalle de confiance de 95% (1.96 pour alpha de 0.05)                                                                                                                                |
| $d$                      | Précision (erreur acceptable); estimation de point; fixé à 0.2                                                                                                                                                                |
| $p$                      | Proportion de la population de l'étude devant se rendre dans un établissement de soins de santé de recrutement pour des conditions associées à de la fièvre et d'autres signes et symptômes (proportion capturée); fixé à 0.2 |
| $1-p$                    | Proportion de la population de l'étude ne devant se rendre dans un établissement de soins de santé de recrutement pour des conditions associées à de la fièvre et d'autres signes et symptômes (proportion non capturée)      |
| $q\hat{p}$               | Proportion minimum de stratification par groupe d'âge, définie à 0,2                                                                                                                                                          |

Les comportements de santé seront évalués deux fois dans les mêmes ménages si possible ou dans des ménages alternatifs, au cas où la population de l'étude serait instable en raison de la migration et / ou de taux de natalité / mortalité élevés. Des ménages supplémentaires, supposés être de 20% en moyenne (Tableau 2), peuvent être ajoutés pour tenir compte de la possible perte de suivi entre les deux évaluations. Eventuellement, l'échantillonnage stratifié pondéré en fonction de la population avec probabilité proportionnelle à la taille de la population (PPPS) pour tenir compte de la probabilité de sélection inégale aux distributions de population hétérogènes entre les strates (poids de la population  $(n/N)$  par strate) sera appliqué à  $\bar{n}_0$  de 553 sera divisé par le nombre de sous-zones et pondéré proportionnellement à la taille de la population en appliquant un échantillonnage stratifié selon le poids (36).

#### **Echantillonnage avec et sans cadre d'échantillonnage de population**

Si une base d'échantillonnage de la population ou une liste de ménages compréhensif et à jour existe (par DSS / HDSS ou recensement-disponible), une sélection aléatoire informatisée des ménages en tant

1  
2  
3 que PSU sera effectuée en utilisant SAS (Système d'analyse statistique, version 9.4, SAS Institute, Cary  
4 NC) en appliquant le PPPS stratifié en fonction de la population une sélection aléatoire simple en série  
5 sans remplacement. Les ménages sélectionnés avec des identifiants sont visualisés en utilisant des DDS /  
6 HDSS ou des outils de recensement. En cas de refus, d'absence d'un répondant ou de localisation d'un  
7 ménage abandonné, les enquêteurs sont formés pour visiter un ménage alternatif le plus proche du la  
8 côte droit ou gauche d'un ménage d'origine. Cela suit le principe de la proximité la plus proche comme vu  
9 dans la recherche précédente (37-40). Pour limiter, en outre, les probabilités de sélection inégale, donc  
10 les probabilités de sélection par les enquêteurs, nous présélectionnons un nombre arbitraire de cinq  
11 ménages alternatifs d'échantillonnage de population qui doivent être plus proches du ménage d'original  
12 plutôt que de demander par exemple une sélection en base de loterie ou une sélection dans le sens des  
13 aiguilles d'une montre (36, 37, 40). En outre, la notation de l'un (=le plus proche) à cinq (=le plus  
14 éloigné) est appliquée aux ménages alternatifs et les enquêteurs sont invités à suivre strictement la  
15 séquence de notation au cours de la procédure de sélection du ménage. La conformité des enquêteurs  
16 avec les règles de sélection des ménages originaux et alternatifs sera vérifiée quotidiennement. Les  
17 écarts seront étudiés et une formation complémentaire sera fournie aux enquêteurs au besoin.  
18

19  
20 S'il n'existe pas de cadre d'échantillonnage de la population, nous appliquerons une technique  
21 d'échantillonnage spatial stratifié PPPS pondérée selon la population (36). Guidés par des recherches  
22 antérieures, des points spatiaux aléatoires sont générés à l'aide de l'outil de génération de points  
23 aléatoires ArcGIS (Aeronautical Reconnaissance Coverage Geographic Information System, Redlands, CA,  
24 USA, version 10.2) (21, 23, 36, 39, 41-46). L'outil place de la manière ~~façon~~ aléatoire des nombres  
25 spécifiés de points ~~spécifiés~~ dans les entités d'un polygone correspondant à une sous-zone administrative  
26 ou à une strate. Les coordonnées X et Y définissent un point jusqu'à ce que la taille d'échantillon calculée  
27 par strate soit atteinte. Les points ~~aléatoires~~ générés par ArcGIS sont convertis en un fichier image au  
28 format KML (Keyhole Markup Language) ou KMZ (Keyhole Markup language Zipped) et importés dans  
29 Google Earth Pro® (~~Google Inc., Mountain View, CA, États-Unis, version 6.2.2.6613~~). Un identifiant  
30 numérique unique et des coordonnées géographiques ~~horizontales~~ sont affectés à chaque point.  
31 ~~L'emplacement de chaque point est vérifié sur une imagerie satellite Google Earth Pro® mise à jour.~~  
32 L'annexe 4 illustre notre approche en utilisant des exemples du Ghana et de Madagascar. Les points  
33 spatiaux géographiques étiquetés avec des identifiants sont représentés sur des impressions de la taille  
34 d'une affiche de (60 x 60 à 60 x 90 cm) d'images satellite Google Earth Pro avec une haute résolution  
35 jusqu'au niveau de la structure ou alternativement en utilisant une application de source ouverte pour la  
36 navigation et la cartographie automatiques hors ligne / en ligne pour localiser les points sélectionnés sur  
37 le terrain. Ces cartes satellites aideront à localiser précisément les points sélectionnés sur le terrain. Des  
38 récepteurs GPS (Global Positioning System) portables (Garmin-eTrex, Garmin Ltd., Lenexa, KS, USA)  
39 aident à vérifier les emplacements. Les récepteurs seront positionnés près d'un point localisé, dans une  
40 position statique et en plein air pour assurer une lecture sans obstacle. Les enquêteurs évaluent les  
41 points spatiaux de la présence d'un ménage en tant que PSU (24). En cas de refus, d'absence du  
42 répondant ou de localisation d'un point non résidentiel, les enquêteurs sont formés pour visiter un point  
43 spatial résidentiel alternatif présélectionné le plus proche de la droite ou de la gauche d'un point original  
44 et l'évaluer pour la présence d'un ménagesera visité (37-39, 47). Pour limiter les chances de probabilité  
45 de sélection inégale, nous présélectionnons au moins cinq points spatiaux alternatifs à proximité  
46 immédiate du point d'origine qui représentent une structure de taille appropriée et de forme rectangulaire  
47 ou carrée à partir de l'imagerie satellite Google Earth Pro outil de mesure de distance. Commue pour les  
48 sites ayant un cadre d'échantillonnage de la population, la notation d'un à cinq est appliquée aux points  
49 spatiaux alternatifs et les enquêteurs doivent suivre la séquence de notation. La conformité des  
50 enquêteurs avec les règles de sélection des ménages originaux et alternatifs sera vérifiée  
51 quotidiennement. Les écarts seront étudiés et une formation complémentaire sera fournie aux  
52 enquêteurs au besoin. Dans le cas où un point spatial est placé dans l'équidistance de deux structures  
53 (ou plus), l'intervieweur saute le point spatial original et choisit un point spatial alternatif présélectionné  
54 suivant la séquence de notation. Dans le cas où deux points spatiaux originaux (ou plus) sont placés sur  
55

1  
2  
3 la même structure, l'intervieweur évalue la structure de la présence d'un ménage et choisit un second  
4 point spatial alternatif (ou plus) présélectionné après la séquence de notation.  
5

6 Indépendamment de la présence ou de l'absence d'un cadre d'échantillonnage de la population, un  
7 ménage unifamilial à un étage sera directement contacté pour participer à l'étude. Cependant, un  
8 ménage seulement est inscrit dans une structure multifamiliale à un seul étage selon les procédures  
9 suivants : l'enquêteur entre dans la structure et évalue le nombre total de ménage : le premier ménage  
10 du côté droit / gauche (selon la construction intérieure) de la structure est approché ; si le premier  
11 ménage ne participe pas, le second ménage du côté droit / gauche de la même structure est approché.  
12 L'enquêteur continue jusqu'à ce qu'un ménage par structure soit inscrit. De même, un ménage seulement  
13 est inscrit dans une structure multifamiliale à plusieurs étages. Après avoir évalué le nombre total de  
14 ménage présents, l'enquêteur se rapproche du premier ménage ne participe pas, le deuxième ménage le  
15 plus proche de l'entrée sur le même étage / suivant (en fonction de la construction intérieure) est  
16 approché ; l'enquêteur continue jusqu'à ce qu'un ménage par structure soit inscrit. L'enquêteur choisit un  
17 point spatial alternatif présélectionné après la séquence de notation au cas où aucun ménage ne peut  
18 être inscrit.  
19

### 20 **Fréquence de la collecte de données**

21 Les points résidentiels seront visités deux fois pour des entrevues au cours du programme SETA pour  
22 prendre en compte un possible impact lié à la saison, sur le comportement sanitaire (48-52). Les  
23 enquêtes auront lieu à différentes saisons - une à la fin de la saison sèche ou au moins un mois après  
24 son début et une vers la fin de la saison des pluies ou au moins un mois après son début (Tableau 3).  
25 Actuellement, l'étude HPAfrica est en cours au Burkina Faso, au Ghana et à Madagascar et devrait se  
26 poursuivre dans les autres pays au cours des prochains mois.  
27

### 28 **Critères d'inclusion et d'exclusion**

29 Les membres du ménage de tout âge et des deux sexes qui vivent dans la zone d'étude au jour de  
30 l'interview seront éligibles pour l'inclusion. Un ménage sera exclu si le répondant désigne refuse de  
31 participer ou n'est pas disponible après trois visites consécutives. Tous les visiteurs et individus dont le  
32 lieu de résidence n'est pas connu ou est en-dehors de la zone d'étude seront exclus.  
33

34 Pour raison de cette enquête, un ménage est défini comme une personne ou un groupe de personnes  
35 apparentées ou non apparentées vivant dans la même unité d'habitation, reconnaissant un individu  
36 adulte comme chef du ménage, partageant les mêmes installations domestiques, et subvenant  
37 indépendamment à leurs besoins en termes de nourriture et des autres éléments essentiels pour vivre  
38 (35).  
39

40 L'interview aura lieu exclusivement avec le répondant, qui est un membre adulte du ménage à l'âge de  
41 majorité légale spécifique au pays. Cette personne peut être identifiée comme décideur par les membres  
42 du même ménage et sert de substitut pour un ménage entier (15). D'autres définitions pertinentes sont  
43 expliquées subséquentement.  
44

### 45 **Collecte de données**

46 Les intervieweurs de site recevront une formation sur la localisation des points géographiques,  
47 l'identification des répondants, les procédures de consentement éclairé en mettant l'accent sur la  
48 participation volontaire, et sur le déploiement de formulaires d'étude standardisés et pré-testés avant le  
49 lancement de HPAfrica.  
50

51 Les formulaires de consentement éclairé et d'étude seront traduits dans la langue officielle du pays par  
52 deux traducteurs bilingue indépendants parlant couramment l'anglais et les locuteurs natifs de la langue  
53 cible qui connaissent le concept et la terminologie des formulaires, et retraduits en anglais pour prendre  
54 en compte des erreurs de traduction et apporter des corrections, le cas échéant. Les deux traductions  
55 seront comparées pour les divergences avec les traducteurs et un coordinateur, et un consensus sera  
56

recherché. La traduction avancée synthétisée sera traduite et traduite de la langue cible vers l'anglais par deux traducteurs indépendants, aveugles aux formes originales. Un consensus sur les écarts de traduction et les formulaires originaux seront recherchés avec les traducteurs et un coordinateur. Les formes traduites feront l'objet d'un test pilote parmi un échantillon de commodité des ménages de la population cible avant leur finalisation pour assurer la compréhensibilité interculturelle et l'équivalence sémantique, idiomatique, expérientielle et conceptuelle. Un rapport de traduction sera préparé (53, 54).

### **Gestion de données**

La gestion des données dépendra du mode de collecte, qui sera principalement électronique plutôt que sur support papier. Les expériences passées ont montré les inconvénients suivants de la collecte de données sur papier: une forte probabilité d'erreurs lors du remplissage des formulaires d'étude, et le besoin de numérisation des données, qui est une étape supplémentaire, laborieuse, qui consomme du temps et sujette aux erreurs. La capture des données électroniques ~~de données~~ à l'aide d'une application pour un appareil mobile, comme un smartphone ou une tablette, réduit ces facteurs limitants à la qualité des données.

Il peut y avoir une période pilote au cours de laquelle des données sur support papier et sans papier seront collectées avant la mise en œuvre complète de la collecte de données électroniques. Ce dernier utilise l'application Android « HPA Collect » (Google Android 5.0.1 9API 23, disponible à l'adresse <https://play.google.com/store/apps/details?id=anint.ivi.hpa>) et la plate-forme « HPA Web » (CSS, JavaScript et JSP, disponible sur <http://hpa.ivi.int/>), qui sont ~~tous deux~~ accompagnés d'un dictionnaire de variables contenant les codes, la signification et les propriétés des variables au moins en anglais et en français. Les deux, « HPA Collect » et « HPA Web », seront conçus spécifiquement pour les besoins de cette étude. L'expertise d'IVI en ingénierie informatique permet la construction fondamentale, la configuration et le développement des composants nécessaires. Différent de nombreux programmes de source ouverte, une fonction d'installation serveur permet le stockage de toutes les données originales collectées sur le serveur institutionnel en plus des fonctionnalités supplémentaires pour la vérification des erreurs profondes, les relations logiques entre variables et formulaires, les fonctions de recherche et l'analyse des données collectées. Une connectivité Internet sans fil stable utilisant des navigateurs par défaut est nécessaire pour assurer une synchronisation simultanée, attribuable, originale et précise des données entre « HPA Collect » et « HPA Web ». L'accès à « HPA Collect » et « HPA Web » est protégé par un mot de passe. L'annexe 5 affiche le diagramme du système, qui a les caractéristiques suivantes:

#### **Structure ou fonctionnalités de « HPA Collect »**

- **Gestion des utilisateurs:** Une interface utilisateur simple fournit différents privilèges aux utilisateurs pour entrer, modifier (sauf pour les étiquettes d'étude) et exporter ou transférer des données. Il établit une piste d'audit qui enregistre lorsque les utilisateurs entrent des données dans le serveur.
- **Saisie de données:** Les données sont entrées directement dans le smartphone ou la tablette. Les champs de saisie limitent les réponses possibles à des réponses plausibles uniquement en offrant différentes méthodes de saisie:
  - Modifier le texte: texte libre
  - Groupe radio / bouton Multi-clic: choix unique (radio group/Multi click button)
  - Case à cocher: choix multiple
  - Sélecteur de date et d'heure: date et heure d'entrée
  - Spinner: bouton déroulant

Des fonctionnalités supplémentaires permettent à l'enquêteur de gagner du temps en transférant les données collectées plus tôt aux champs de données requis à un stade ultérieur de l'interview en effectuant des vérifications de vraisemblance pour divers champs de saisie de données et en reconnaissant facilement les modèles de saut. Les vérifications d'erreurs, les notifications de données manquantes, les erreurs de code et les erreurs logiques sont également incluses.

- **Vue des données:** Les données brutes entrées à l'origine peuvent être vues dans le même format lisible par l'homme et la machine, à savoir le format JSON, étant donné qu'elles seront transférées vers un serveur de base de données (Windows, MySQL). Des fonctions supplémentaires telles que «effacer» pour effacer tous les enregistrements, «réinitialiser» pour revenir à la page de vue'entrée de données principale, et «rechercher» pour rechercher une étiquette d'étude sont disponibles.
- **Exporter :** Toutes les données entrées seront envoyées au serveur IVI via une connexion Internet sans fil. Chaque enregistrement de formulaire ayant une étiquette d'étude unique du ménage inscrit est transformé en une requête d'insertion SQL et inséré sur le serveur uniquement s'il n'y a pas d'étiquette d'étude en double trouvée. L'insertion de données sera ignorée dans le cas d'étiquettes d'étude dupliquées.
- **Exporter ers local :** Tous les données entrées seront sauvegardées trois fois dans un dossier de stockage public de l'appareil mobile au format JSON et txt. Les fichiers txt contiennent des données de chaque formulaire individuel. Une version de fichiers JSON contient des données par chaque formulaire individuel et une deuxième version de fichiers JSON contient toutes les données d'un ménage inscrit. Les données au format JSON peuvent être extraites par USB ou connexion Internet sans fil.
- **Rapport :** Cette fonctionnalité permet à un utilisateur de signaler toute requête à l'administrateur principal de « HPA Collect » à IVI par e-mail ou par une application tierce.
- **Paramètres:** la possibilité de changer la langue du système entre l'anglais et le français est fournie.
- **À propos de:** La version actuellement installée de «HPA Collect» est affichée.

#### Structure ou caractéristiques de « HPA Web »

- **Accueil:** une introduction à la plateforme est donnée et un tutoriel en français et en anglais sera accessible.
- **Aperçu du Formulaire:** Les formulaires d'étude sont affichés séparément montrant chaque question et les données d'entrée correspondantes en tant que variables définies.
- **Modifier le formulaire:** cette fonction permet la correction des données téléchargées. Il est uniquement accessible aux gestionnaires de données de chaque pays participant et à IVI.
- **Cherche:** Les étiquettes d'étude spécifiques données à chaque formulaire d'étude peuvent être filtrées.
- **Dictionnaire des variables:** Le dictionnaire variable peut être téléchargé.
- **Exporter:** Les données peuvent être converties à partir du serveur dans un fichier Excel transférable.
- **Contactez-nous:** Une correspondance rapide et facile entre les utilisateurs et le gestionnaire de données à IVI est donnée.

Les données seront examinées quotidiennement par le personnel clé de l'étude et vérifiées en termes de consistance et d'exactitude avant l'analyse des données. La qualité des données peut être vérifiée en sélectionnant un sous-ensemble de 5% pour la validation par rapport aux données originales sur support papier, si possible. Les noms des membres du ménage ne seront pas liés aux formulaires d'étude de HPAfrica et ne seront pas enregistrés dans la base de données afin d'assurer la confidentialité. L'accès à la base de données sera limité au personnel d'étude autorisé uniquement et les données seront conservées dans un endroit sécurisé et protégé. Des fichiers de sauvegarde provisoires périodiques et au moins trois fichiers de sauvegarde définitifs de la base de données stockés dans un endroit sécurisé et verrouillé éviteront la perte de données et garantiront la sécurité des données. Toutes les données seront conservées pendant au moins cinq ans.

#### L'analyse des données

Les poids d'échantillonnage combinés seront calculés pour tenir compte des différences possibles dans les probabilités de sélection et pour accroître la précision des estimations de l'étude (22, 55). Les poids sont générés dans une approche à plusieurs niveaux pour prendre en compte des probabilités de sélection de

par exemple les ménages, les poids inverses au sein des ménages (c'est-à-dire la structure à plusieurs étages à plusieurs familles, la structure à plusieurs étages multifamiliale) et les poids inverses parmi les membres du ménage participant à l'étude HPAfrica (21, 39). Les outils de source ouverte, les données de recensement et les données générées par HPAfrica telles que la taille de la population, le nombre de ménages ou de structures, le nombre de ménages dans les structures multifamiliales / multi-étages et la taille des ménages par strate seront utilisés pour calculer poids (56, 57).

Des analyses descriptives telles que les fréquences absolues et relatives, les médianes ou les moyennes arithmétiques seront effectuées pour construire une description contemporaine de la population de base. Les analyses de base comprendront le calcul des proportions stratifiées selon l'âge et le sexe, des comportements sanitaires *génériques* et *réels*, y compris l'utilisation des soins de santé, pour divers signes et symptômes ou combinaisons de signes et de symptômes. Ces analyses permettront une classification graduelle basée sur la sévérité de la maladie, incluant un intervalle de confiance de 95%. Le comportement de santé sera ajusté pour un effet de regroupement naturel présumé parmi les membres du ménage. Des données stratifiées les plus à jour sur la population par site et les données démographiques dérivées de HPAfrica seront utilisées pour générer les proportions pour l'ajustement des calculs d'incidence.

Les informations socio-économiques collectées seront utilisées pour construire des indices de richesse des populations étudiées en appliquant des analyses factorielles basées sur la méthode des composantes principales (38). De plus, des analyses de régression bi et multivariée seront effectuées pour identifier les facteurs de confusion potentiels ou la modification des effets en utilisant les scores factoriels.

Les analyses de régression bi et multivariée seront effectuées en utilisant les scores factoriels pour l'évaluation des variables suivantes:

- Données socioéconomiques telles que l'éducation, le revenu, l'assurance maladie, le logement et les biens des ménages
- Hygiène et assainissement tels que l'accès aux toilettes, les sources d'eau, la manipulation des aliments, l'élimination des déchets et les contacts avec les animaux
- Comportement sanitaire: *réel* (stratifié selon l'âge et le sexe, gravité, fréquence), *générique* (stratifié selon l'âge et le sexe, gravité, classement par choix)
- Modalités de déplacement vers les établissements de santé, stratifiées selon l'âge
- Saisonnalité liée à l'hygiène et à l'assainissement, comportement sanitaire, modalités de déplacement
- Facteurs culturels / religieux / ethnographiques, stratifiés selon l'âge
- Statut de vaccination parmi les enfants  $\leq 6$  ans (18, 19)
- Connaissance et perception des maladies courantes

### Considérations éthiques

Il n'y a pas d'avantages directs pour les ménages inscrits et leurs membres. Les avantages indirects pour la population générale sur les sites seront les informations mises à jour sur le fardeau des maladies transmissibles, y compris les facteurs influençant la transmission de la maladie et l'infection. L'étude HPAfrica génère des évidences pour aider les décideurs à introduire des mesures appropriées pour la prévention et le contrôle des maladies.

Ce protocole a fait l'objet d'examen par le Comité de Révision Institutionnelle d'IVI et des comités locaux spécifiques aux sites, comme indiqué dans la section «Références éthiques». Pendant et après l'étude HPAfrica, toutes les données des sujets inscrits seront gardées avec une stricte confidentialité et ne seront pas divulguées à une tierce partie par aucun membre de l'équipe de recherche. La protection par mot de passe des appareils et de la base de données est utilisée pour une stricte confidentialité. Toutes les données sur support papier (formulaire de consentement) seront conservées dans un endroit sécurisé et verrouillé. Les informations confidentielles stockées sur des ordinateurs et des sources de données sur



1  
2  
3 support papier seront seulement mises à la disposition des co-chercheurs et du personnel d'IVI  
4 directement impliqués dans les activités d'étude de HPAfrica.  
5

### 6 **Abbreviations**

7 JSON: JavaScript Objective Notation; CSS: Cascading Style Sheets; JSP: Java Server Page; SQL:  
8 Structured Query Language  
9

10  
11  
12  
13  
14  
15  
16  
17  
18  
19  
20  
21  
22  
23  
24  
25  
26  
27  
28  
29  
30  
31  
32  
33  
34  
35  
36  
37  
38  
39  
40  
41  
42  
43  
44  
45  
46  
47  
48  
49  
50  
51  
52  
53  
54  
55  
56  
57  
58  
59  
60

For peer review only

## Définitions/Terminologie

| <b>A</b>                                         |                                                                                                                                                                                                                                                                                                                                                                                                                                                                                                                                                                                                                                                                                                 |
|--------------------------------------------------|-------------------------------------------------------------------------------------------------------------------------------------------------------------------------------------------------------------------------------------------------------------------------------------------------------------------------------------------------------------------------------------------------------------------------------------------------------------------------------------------------------------------------------------------------------------------------------------------------------------------------------------------------------------------------------------------------|
| Automédication                                   | Fait de se médicamenter soi-même ou de traiter sa propre maladie ou son état sans supervision médicale ou ordonnance.                                                                                                                                                                                                                                                                                                                                                                                                                                                                                                                                                                           |
| <b>B</b>                                         |                                                                                                                                                                                                                                                                                                                                                                                                                                                                                                                                                                                                                                                                                                 |
| <b>C</b>                                         |                                                                                                                                                                                                                                                                                                                                                                                                                                                                                                                                                                                                                                                                                                 |
| Choléra                                          | Maladie infectieuse de l'intestin grêle qui peut être mortelle causée par la bactérie <i>Vibrio cholerae</i> ; elle se propage par voie fécale-orale par l'ingestion d'eau et d'aliments contaminés et provoque fièvre, diarrhée aqueuse sévère, vomissements et déshydratation.                                                                                                                                                                                                                                                                                                                                                                                                                |
| Confusion/Vertiges/Perte de connaissance         | L'état de désorientation ou d'absence de clarté d'esprit ; l'état anormal de réponse aux stimuli dans l'environnement; faible, wooziness, faiblesse, instabilité ou tendance à tomber; l'interruption de la conscience de soi et de son environnement.                                                                                                                                                                                                                                                                                                                                                                                                                                          |
| Convulsion                                       | Mouvement soudain, violent et irrégulier d'un membre/d'une partie du corps ou de tout le corps causé par une contraction involontaire des muscles.                                                                                                                                                                                                                                                                                                                                                                                                                                                                                                                                              |
| Coqueluche (Pertussis)                           | La coqueluche est une maladie bactérienne très contagieuse. Les symptômes d'un froid commun comme nez qui coule, fièvre et toux sont suivis par des semaines de toux sévère et un son aigu de la coqueluche ou haletant quand une personne malade inspire; toux sévère peut être suivie de vomissements, rupture des côtes ou fatigue extrême. Les très jeunes et les personnes âgées infectées peuvent avoir peu ou pas de toux, ou peuvent avoir des périodes de respiration interrompue pendant lesquelles elles ne respirent pas. La coqueluche est transmise par la bactérie <i>Bordetella pertussis</i> par toux et éternuements d'une personne infectée.                                 |
| <b>D</b>                                         |                                                                                                                                                                                                                                                                                                                                                                                                                                                                                                                                                                                                                                                                                                 |
| Déshydratation                                   | Une condition de perte excessive d'eau/d'hydratation par le corps.                                                                                                                                                                                                                                                                                                                                                                                                                                                                                                                                                                                                                              |
| Diarrhée                                         | Une condition d'évacuer les matières fécales du corps très fréquemment et sous forme plutôt liquide que solide.                                                                                                                                                                                                                                                                                                                                                                                                                                                                                                                                                                                 |
| Difficultés respiratoires/<br>Respiration sévère | Une condition de la respiration anormale accompagnée d'une respiration sifflante, d'une douleur thoracique, d'un tirage thoracique, d'un stridor, d'un gonflement de la poitrine ou d'une toux par exemple.                                                                                                                                                                                                                                                                                                                                                                                                                                                                                     |
| Diphthérie                                       | Maladie hautement contagieuse, parfois mortelle, causée par la bactérie <i>Corynebacterium diphtheriae</i> . Elle se transmet de personne à personne, par l'air ou les objets contaminés et affecte les voies respiratoires supérieures. Les symptômes courants sont maux de gorge, gonflement des glandes/ ganglions lymphatiques, malaise, fièvre/frissons, substance membraneuse/matière grise et épaisse qui se forme dans la gorge/sur les amygdales et gêne/accélère la respiration (toux rauque) et gêne pour avaler. Une forme de diphthérie qui implique la peau, les yeux et les organes génitaux est également signalée et se caractérise par une peau douloureuse, rouge et enflée. |
| Douleur abdominale/<br>Douleur intestinale       | Douleur (aiguë/courte durée ou chronique/longue durée) qui survient entre la poitrine et l'aîne (souvent désignée comme la région de l'estomac/du ventre)                                                                                                                                                                                                                                                                                                                                                                                                                                                                                                                                       |
| Douleur intestinale/Douleur<br>abdominale        | Douleur (aiguë/courte durée ou chronique/longue durée) qui survient entre la poitrine et l'aîne (souvent désignée comme la région de l'estomac/du ventre)                                                                                                                                                                                                                                                                                                                                                                                                                                                                                                                                       |
| Douleur/Maux                                     | État caractérisé par une douleur sourde continue/prolongée dans une partie du corps ; la sensation/souffrance/inconfort physique causée par                                                                                                                                                                                                                                                                                                                                                                                                                                                                                                                                                     |

|                                      |                                                                                                                                                                                                                                                                                                                                                                                                                                                                          |
|--------------------------------------|--------------------------------------------------------------------------------------------------------------------------------------------------------------------------------------------------------------------------------------------------------------------------------------------------------------------------------------------------------------------------------------------------------------------------------------------------------------------------|
|                                      | une maladie/une blessure/quelque chose qui fait mal au corps.                                                                                                                                                                                                                                                                                                                                                                                                            |
| <b>E</b>                             |                                                                                                                                                                                                                                                                                                                                                                                                                                                                          |
| Éducation formelle                   | Modèle d'éducation systématique et organisée structuré et administré selon un ensemble de lois et de normes ; les institutions d'éducation formelle sont organisées de façon administrative, physique et pédagogique et exigent des étudiants une assiduité minimum ; il implique des évaluations intermédiaires et finales afin d'accéder au niveau d'apprentissage suivant ; il délivre des certificats et des diplômes conformément à un ensemble de règles strictes. |
| Essoufflement/<br>Respiration rapide | Fait de respirer anormalement rapidement et profondément ; à une fréquence de >20 respirations par minute pour les adultes, >30 respirations par minute pour les enfants et >45 respirations par minute par les bébés.                                                                                                                                                                                                                                                   |
| Établissement de santé               | Lieux ou institutions où des soins de santé sont prodigués ; dont les hôpitaux, les cliniques, les centres de santé, les postes de santé et les centres de soins spécialisé.                                                                                                                                                                                                                                                                                             |
| Éternuement                          | Fait d'expulser soudainement l'air par le nez et la bouche avec un bruit important caractéristique.                                                                                                                                                                                                                                                                                                                                                                      |
| <b>F</b>                             |                                                                                                                                                                                                                                                                                                                                                                                                                                                                          |
| Faiblesse/Malaise/Fatigue            | État de se sentir fatigué/épuisé/à bout de forces ; sentiment général d'inconfort/malaise/de ne pas être en bonne santé ou heureux.                                                                                                                                                                                                                                                                                                                                      |
| Fatigue/Malaise/<br>Faiblesse        | État de se sentir fatigué/épuisé/à bout de forces ; sentiment général d'inconfort/malaise/de ne pas être en bonne santé ou heureux.                                                                                                                                                                                                                                                                                                                                      |
| Fièvre                               | Température corporelle anormalement élevée (habituellement au-dessus de 38°C).                                                                                                                                                                                                                                                                                                                                                                                           |
| Fièvre <3 jours                      | Température corporelle anormalement élevée (habituellement au-dessus de 38°C) qui dure moins de 3 jours et apparaît en continu.                                                                                                                                                                                                                                                                                                                                          |
| Fièvre >3 jours                      | Température corporelle anormalement élevée (habituellement au-dessus de 38°C) qui dure plus de 3 jours et apparaît en continu.                                                                                                                                                                                                                                                                                                                                           |
| Fièvre jaune                         | Maladie infectieuse aiguë, pathogène pour l'homme et virale caractérisée par l'apparition soudaine de symptômes comme fièvre, frissons, perte d'appétit, nausée, douleurs musculaires et maux de tête qui disparaissent généralement en quelques jours ou sont suivis de symptômes plus graves comme jaunisse, fièvre forte et hémorragie. La maladie est causée par un virus du genre Flavivirus et est transmise par la piqûre d'un moustique infecté.                 |
| Fièvre typhoïde                      | Maladie infectieuse bactérienne potentiellement mortelle causée par <i>Salmonella typhi</i> ; elle se transmet par la voie fécale-orale par les aliments et l'eau contaminés ou de personne à personne. Les symptômes courants sont forte fièvre, maux de tête, douleur abdominale, constipation/diarrhée et éruption cutanée. Des complications graves (perforation de l'intestin) sont rapportées.                                                                     |
| Frissons                             | Sensation de froid qui peut être accompagnée de frissons/tremblements du corps et de pâleur de la peau                                                                                                                                                                                                                                                                                                                                                                   |
| <b>G</b>                             |                                                                                                                                                                                                                                                                                                                                                                                                                                                                          |
| Gonflement/Œdème                     | État d'accumulation excessive de liquide aqueux/gonflement des cavités ou des tissus du corps ; couramment constaté dans les mains/bras/pieds/jambes ; augmentation du volume de tissu.                                                                                                                                                                                                                                                                                  |
| Grippe                               | Maladie infectieuse hautement contagieuse des voies respiratoires causée par le virus de la grippe ; elle se propage de personne à personne par les particules expulsées par la toux/les éternuements/la parole et les objets contaminés. Les symptômes courants sont fièvre,                                                                                                                                                                                            |

|                                                |                                                                                                                                                                                                                                                                                                                                                                                                                                                                                                                                   |
|------------------------------------------------|-----------------------------------------------------------------------------------------------------------------------------------------------------------------------------------------------------------------------------------------------------------------------------------------------------------------------------------------------------------------------------------------------------------------------------------------------------------------------------------------------------------------------------------|
|                                                | douleurs dans les muscles/bras/jambes, frissons/sueur, maux de tête, fatigue/faiblesse, nez qui coule/congestion nasale, éternuements, maux de gorge et toux sèche et persistante.                                                                                                                                                                                                                                                                                                                                                |
| Guérisseur traditionnel                        | Personne qui cherche à maintenir la santé aussi bien qu'à prévenir, diagnostiquer et améliorer ou traiter les maladies en utilisant un ensemble de connaissances, compétences et pratiques basées sur des théories, des croyances et des expériences.                                                                                                                                                                                                                                                                             |
| <b>H</b>                                       |                                                                                                                                                                                                                                                                                                                                                                                                                                                                                                                                   |
| <i>Haemophilus influenzae</i> de type B        | Bactérie qui provoque une série de maladies et se propage par les particules expulsées par la toux ou les éternuements, et surviennent surtout chez l'enfant de moins de 5 ans ; les symptômes courants sont fièvre, maux de tête et raideur dans le cou jusqu'à l'état septique. Elle peut causer otites, cellulites (infection des tissus mous), arthrite, infections des voies respiratoires supérieures, pneumonies, méningites (avec dommages potentiels au cerveau) et épiglottites (avec obstruction des voies aériennes). |
| Hémorragie (interne/externe)/<br>Perte de sang | État caractérisé par une perte de sang du système vasculaire, soit de façon interne à l'intérieur du corps (hémorragie interne) soit de façon externe par un orifice naturel ou une lésion de la peau (hémorragie externe) ; sang qui s'échappe d'un vaisseau sanguin endommagé.                                                                                                                                                                                                                                                  |
| Hépatite B                                     | Maladie infectieuse causée par le virus de l'hépatite B (VHB) qui affecte le foie (infection hépatique aiguë/chronique ; peut entraîner une insuffisance hépatique/un cancer/une cirrhose). Le virus se transmet de personne à personne par le sang/le sperme/les autres fluides corporels. Les symptômes courants sont fièvre, malaise/faiblesse/fatigue, perte d'appétit, nausée/vomissements, gêne/douleur abdominale, urines foncées, douleurs articulaires et jaunisse.                                                      |
| Hépatite E                                     | Maladie infectieuse causée par le virus de l'hépatite E (VHE) qui affecte le foie (infection hépatique aiguë uniquement ; peut entraîner une insuffisance hépatique aiguë). Le virus se propage par les voies fécales-orales par l'ingestion d'eau ou d'aliments contaminés, les animaux contaminés (de façon zoonotique) et par le sang. Les symptômes courants sont fièvre, malaise, perte d'appétit, diarrhée, nausée, gêne abdominale, urines foncées, douleurs articulaires et jaunisse.                                     |
| <b>I</b>                                       |                                                                                                                                                                                                                                                                                                                                                                                                                                                                                                                                   |
| <b>J</b>                                       |                                                                                                                                                                                                                                                                                                                                                                                                                                                                                                                                   |
| Jaunisse                                       | Maladie qui fait jaunir la peau/le blanc des yeux.                                                                                                                                                                                                                                                                                                                                                                                                                                                                                |
| <b>K/L</b>                                     |                                                                                                                                                                                                                                                                                                                                                                                                                                                                                                                                   |
| <b>M</b>                                       |                                                                                                                                                                                                                                                                                                                                                                                                                                                                                                                                   |
| Malaise/Fatigue/<br>Faiblesse                  | État de se sentir fatigué/épuisé/à bout de forces ; sentiment général d'inconfort/malaise/de ne pas être en bonne santé ou heureux.                                                                                                                                                                                                                                                                                                                                                                                               |
| Maux de tête                                   | Douleur continue dans une région de la tête.                                                                                                                                                                                                                                                                                                                                                                                                                                                                                      |
| Maux/Douleur                                   | État caractérisé par une douleur sourde continue/prolongée dans une partie du corps ; la sensation/souffrance/inconfort physique causée par une maladie/une blessure/quelque chose qui fait mal au corps.                                                                                                                                                                                                                                                                                                                         |
| Médecin                                        | Une personne compétente/formée aux soins ; une personne éduquée, cliniquement expérimentée et autorisée à pratiquer la médecine.                                                                                                                                                                                                                                                                                                                                                                                                  |
| Ménage                                         | Personne ou groupe de personnes apparentées ou non qui vivent ensemble dans la même unité d'habitation, qui reconnaissent un adulte de sexe masculin ou féminin comme le chef du ménage, qui partagent                                                                                                                                                                                                                                                                                                                            |

|                                              |                                                                                                                                                                                                                                                                                                                                                                                                                                                                                                                                                                                               |
|----------------------------------------------|-----------------------------------------------------------------------------------------------------------------------------------------------------------------------------------------------------------------------------------------------------------------------------------------------------------------------------------------------------------------------------------------------------------------------------------------------------------------------------------------------------------------------------------------------------------------------------------------------|
|                                              | les mêmes installations domestiques, qu'on considère comme formant une unité, et qui subviennent à leurs besoins en termes de nourriture et des autres éléments essentiels pour vivre. Un ménage peut être situé dans une unité d'habitation unique (bâtiment à un seul étage) ou dans un ensemble de logements collectifs (bâtiment à plusieurs étages).                                                                                                                                                                                                                                     |
| Méningite                                    | Inflammation virale/bactérienne/fongique infectieuse parfois mortelle des membranes (méninges) qui entourent le cerveau et la moelle épinière ; elle se propage de personne à personne par les particules expulsées par la toux/les éternuements/la parole et les objets contaminés. Les symptômes courants sont forte fièvre, maux de tête sévères, nausée/vomissements, confusion, convulsions ; perte d'appétit et de la soif, fatigue, sensibilité à la lumière, éruption cutanée et raideur au cou.                                                                                      |
| <b>N</b>                                     |                                                                                                                                                                                                                                                                                                                                                                                                                                                                                                                                                                                               |
| Nausée/Vomissements                          | Sensation de malaise dans l'estomac avec tendance à vomir ; fait d'éjecter une partie/tout le contenu de l'estomac principalement par la bouche.                                                                                                                                                                                                                                                                                                                                                                                                                                              |
| Nez qui coule                                | État résultant de la production par le nez (tissus nasaux et adjacents et vaisseaux sanguins) de mucus/drainage excessif, qui coule du nez pour retirer quelque chose.                                                                                                                                                                                                                                                                                                                                                                                                                        |
| <b>O</b>                                     |                                                                                                                                                                                                                                                                                                                                                                                                                                                                                                                                                                                               |
| Œdème/Gonflement                             | État d'accumulation excessive de liquide aqueux/gonflement des cavités ou des tissus du corps ; couramment constaté dans les mains/bras/pieds/jambes ; augmentation du volume de tissu.                                                                                                                                                                                                                                                                                                                                                                                                       |
| Oreillons                                    | Maladie infectieuse virale causée par le virus des oreillons qui affecte principalement les glandes parotides qui sont situées sous et devant les oreilles ; elle se propage de personne à personne par la salive infectée/les particules de salive infectées expulsées par la toux/les éternuements/la parole et les objets contaminés. Les symptômes courants sont fièvre, gonflement d'une/des deux glandes parotides, maux de tête ; douleurs musculaires, faiblesse/fatigue, perte d'appétit et douleurs en mâchant/avalant ; une complication connue est une possible perte d'audition. |
| <b>P</b>                                     |                                                                                                                                                                                                                                                                                                                                                                                                                                                                                                                                                                                               |
| Paludisme                                    | Maladie infectieuse parfois mortelle causée par un parasite ( <i>Plasmodium</i> spp.) transmis principalement par la piqûre de moustiques infectés, en dehors de la transmission mère-enfant et par le sang. Les symptômes courants sont attaques récurrentes de frissons, sueurs, forte fièvre, maux de tête, vomissements et diarrhée.                                                                                                                                                                                                                                                      |
| Personne interrogée                          | Membre adulte (à l'âge légal de majorité du pays concerné) du ménage qui est un décideur en ce qui concerne les soins de santé/l'utilisation des soins de santé pour le ménage entier à l'intérieur du site d'étude ; cette personne adulte parle ainsi au nom de tous les membres du ménage. Cette personne peut être identifiée par les autres membres du même ménage comme la personne qui est principalement impliquée dans les soins quotidiens des membres du ménage.                                                                                                                   |
| Perte de connaissance/<br>Vertiges/Confusion | L'état de désorientation ou d'absence de clarté d'esprit ; l'état anormal de réponse aux stimuli dans l'environnement; faible, wooziness, faiblesse, instabilité ou tendance à tomber; l'interruption de la conscience de soi et de son environnement.                                                                                                                                                                                                                                                                                                                                        |
| Perte de poids                               | Baisse (volontaire/involontaire) du poids du corps.                                                                                                                                                                                                                                                                                                                                                                                                                                                                                                                                           |
| Perte de sang/                               | État caractérisé par une perte de sang du système vasculaire, soit de                                                                                                                                                                                                                                                                                                                                                                                                                                                                                                                         |

|                                                  |                                                                                                                                                                                                                                                                                                                                                                                                                                                                                                                                                                                  |
|--------------------------------------------------|----------------------------------------------------------------------------------------------------------------------------------------------------------------------------------------------------------------------------------------------------------------------------------------------------------------------------------------------------------------------------------------------------------------------------------------------------------------------------------------------------------------------------------------------------------------------------------|
| Hémorragie                                       | façon interne à l'intérieur du corps (hémorragie interne) soit de façon externe par un orifice naturel ou une lésion de la peau (hémorragie externe) ; sang qui s'échappe d'un vaisseau sanguin endommagé.                                                                                                                                                                                                                                                                                                                                                                       |
| Pharmacie                                        | Endroit où seuls des médicaments (ordonnance requise/non requise) sont préparés, conservés, composés et dispensés.                                                                                                                                                                                                                                                                                                                                                                                                                                                               |
| Pneumocoque                                      | Une inflammation infectieuse bactérienne des poumons parfois mortelle qui affecte souvent les personnes immunodéprimées et est causée par la bactérie <i>Streptococcus pneumoniae</i> ; elle se propage de personne à personne par les particules expulsées par la toux/les éternuements/la parole et les objets contaminés. Les symptômes courants sont fièvre, frissons, toux (avec mucosités/pus), douleurs thoraciques, difficulté à respirer/essoufflement, fatigue, nausée/vomissements et diarrhée ; des symptômes rares sont septicémie, épanchement pleural et empyème. |
| Polio                                            | Maladie virale infectieuse, très contagieuse, parfois mortelle, causée par le poliovirus qui cause dans sa forme la plus sévère paralysie et difficultés à respirer ; il se transmet par la voie fécale-orale par ingestion d'eau et d'aliments contaminés et de personne à personne. Les symptômes courants sont fièvre, maux de gorge, maux de tête, vomissements, fatigue, maux de dos, de cou/raideur au cou, faiblesse des muscles/muscles douloureux, méningite, perte de réflexes, membres lourds/pendants.                                                               |
| Occupation                                       | A job, or means of earning a wage/living; often requires the mastery of a complex set of knowledge, tasks, duties and skills acquired through formal education and/or practical experience.                                                                                                                                                                                                                                                                                                                                                                                      |
| <b>Q</b>                                         |                                                                                                                                                                                                                                                                                                                                                                                                                                                                                                                                                                                  |
| <b>R</b>                                         |                                                                                                                                                                                                                                                                                                                                                                                                                                                                                                                                                                                  |
| Respiration rapide/<br>Essoufflement             | Fait de respirer anormalement rapidement et profondément ; à une fréquence de >20 respirations par minute pour les adultes, >30 respirations par minute pour les enfants et >45 respirations par minute par les bébés.                                                                                                                                                                                                                                                                                                                                                           |
| Respiration sévère/<br>Difficultés respiratoires | Une condition de la respiration anormale accompagnée d'une respiration sifflante, d'une douleur thoracique, d'un tirage thoracique, d'un stridor, d'un gonflement de la poitrine ou d'une toux par exemple.                                                                                                                                                                                                                                                                                                                                                                      |
| Revenus/Salaire                                  | Argent ou autre forme de paiement que quelqu'un reçoit périodiquement/régulièrement en échange de biens ou de services. Provient généralement d'un emploi/d'une profession.                                                                                                                                                                                                                                                                                                                                                                                                      |
| Rotavirus                                        | Infection virale causée par le rotavirus qui cause principalement des diarrhées pour les enfants de moins de 5 ans ; elle se propage par la voie fécale-orale, de personne à personne et par les objets contaminés. Les symptômes courants sont diarrhée aqueuse, fièvre, vomissements, douleurs abdominales et déshydratation.                                                                                                                                                                                                                                                  |
| Rougeole                                         | Maladie infectieuse parfois mortelle des voies respiratoire (nez/gorge) causée par un virus qui affecte principalement les enfants de moins de 5 ans ; elle se propage de personne à personne par les particules expulsées par la toux/les éternuements/la parole et les objets contaminés. Les symptômes courants sont fièvre, toux sèche, nez qui coule, inflammation des yeux, maux de gorge, larges plaques sur la peau et points blancs dans la bouche et sur les joues.                                                                                                    |
| Rubéole                                          | Maladie infectieuse virale contagieuse connue pour son éruption cutanée rouge distinctive qui est causée par le virus de la rubéole ; elle se transmet de personne à personne (toux/éternuements/parole), de la mère à l'enfant par le sang et les objets contaminés. Les symptômes courants sont fièvre modérée, maux de tête, nez bouché/qui coule,                                                                                                                                                                                                                            |

|                                          |                                                                                                                                                                                                                                                                                                                                                                                                                                                                                                                                                                                                                                                                                                                                                                                                                                                                                                                                                                      |
|------------------------------------------|----------------------------------------------------------------------------------------------------------------------------------------------------------------------------------------------------------------------------------------------------------------------------------------------------------------------------------------------------------------------------------------------------------------------------------------------------------------------------------------------------------------------------------------------------------------------------------------------------------------------------------------------------------------------------------------------------------------------------------------------------------------------------------------------------------------------------------------------------------------------------------------------------------------------------------------------------------------------|
|                                          | yeux rouges/inflammation des yeux, ganglions lymphatiques gonflés et sensibles à la base du crâne/à l'arrière du cou/derrière les oreilles, douleurs articulaires et éruption cutanée rose qui se déplace du visage au torse, aux bras et aux jambes.                                                                                                                                                                                                                                                                                                                                                                                                                                                                                                                                                                                                                                                                                                                |
| <b>S</b>                                 |                                                                                                                                                                                                                                                                                                                                                                                                                                                                                                                                                                                                                                                                                                                                                                                                                                                                                                                                                                      |
| Soins de santé - généraux                | Soins de santé pour les maladies qui n'ont aucun lien avec l'apparition de maladies associées aux signes et symptômes ou les dates de début de maladies.                                                                                                                                                                                                                                                                                                                                                                                                                                                                                                                                                                                                                                                                                                                                                                                                             |
| Soins de santé - réels                   | Soins de santé liés l'apparition de maladies associées aux signes et symptômes ou les dates de début de maladies.                                                                                                                                                                                                                                                                                                                                                                                                                                                                                                                                                                                                                                                                                                                                                                                                                                                    |
| <b>T</b>                                 |                                                                                                                                                                                                                                                                                                                                                                                                                                                                                                                                                                                                                                                                                                                                                                                                                                                                                                                                                                      |
| Témoin                                   | Personne adulte (à l'âge légal de majorité du pays concerné), qui est indépendante de l'étude, qui ne peut pas être indûment influencée par le personnel de l'étude, qui participe au processus de consentement éclairé si le sujet/le représentant légal du sujet est analphabète, et qui lit (lettré) le formulaire de consentement éclairé et toute autre information écrite présentée au sujet.                                                                                                                                                                                                                                                                                                                                                                                                                                                                                                                                                                  |
| Tétanos                                  | Une maladie infectieuse caractérisée par des spasmes musculaires qui commencent généralement dans la mâchoire et progresse vers le reste du corps. Les spasmes durent généralement quelques minutes et se produisent fréquemment pendant les 3-4 semaines au début de la maladie, ils peuvent être si graves qu'ils peuvent causer des fractures osseuses ou la mort lorsqu'ils affectent les muscles respiratoires. Elle peut être caractérisée par d'autres symptômes comme fièvre, sueurs, maux de tête, difficultés à avaler, pression artérielle élevée et augmentation du rythme cardiaque. La maladie est causée par une infection par la bactérie <i>Clostridium tetani</i> qui se trouve dans sol, saliva, poussière et fumier. La bactérie entre par une lésion cutanée (par exemple, coupure, blessure par ponction) par un objet contaminé. Il produit des toxines qui interfèrent avec les contractions musculaires qui résultent des spasmes typiques. |
| Toux                                     | Fait d'expulser de façon soudaine/rapide et bruyamment l'air des poumons ; souvent de façon involontaire afin de dégager les voies respiratoires des poumons de fluides/mucus/autres matières                                                                                                                                                                                                                                                                                                                                                                                                                                                                                                                                                                                                                                                                                                                                                                        |
| Troubles cardiaques                      | Tout trouble que affecte le cœur ; maladies qui impliquent des vaisseaux sanguins rétrécis/bloqués qui peuvent entraîner une attaque cardiaque/douleur thoracique/accident vasculaire cérébral ; maladie qui affecte le muscle/les valves/le rythme du cœur.                                                                                                                                                                                                                                                                                                                                                                                                                                                                                                                                                                                                                                                                                                         |
| Troubles de la pression artérielle       | Pression artérielle élevée/faible ou pression artérielle qui présente des fluctuations excessives.                                                                                                                                                                                                                                                                                                                                                                                                                                                                                                                                                                                                                                                                                                                                                                                                                                                                   |
| Tuberculose                              | Maladie infectieuse bactérienne ( <i>Mycobacterium tuberculosis</i> ), contagieuse, potentiellement grave qui affecte principalement les poumons en plus des reins et de la colonne vertébrale/du cerveau ; elle se transmet de personne à personne par les particules expulsées par la toux/les éternuements/la parole. Les symptômes courants d'une tuberculose active sont toux (avec/sans sang), douleur thoracique, perte de poids, fatigue, fièvre, sueurs nocturnes, frissons et perte d'appétit.                                                                                                                                                                                                                                                                                                                                                                                                                                                             |
| <b>U</b>                                 |                                                                                                                                                                                                                                                                                                                                                                                                                                                                                                                                                                                                                                                                                                                                                                                                                                                                                                                                                                      |
| <b>V</b>                                 |                                                                                                                                                                                                                                                                                                                                                                                                                                                                                                                                                                                                                                                                                                                                                                                                                                                                                                                                                                      |
| Vertiges/Confusion/Perte de connaissance | L'état de désorientation ou d'absence de clarté d'esprit ; l'état anormal de réponse aux stimuli dans l'environnement; faible, wooziness, faiblesse, instabilité ou tendance à tomber; l'interruption de la                                                                                                                                                                                                                                                                                                                                                                                                                                                                                                                                                                                                                                                                                                                                                          |

|                     |                                                                                                                                                                                                                                                                                                                                                                                                                                                                                                                                                                                                                                                                                                                                                                                                                                             |
|---------------------|---------------------------------------------------------------------------------------------------------------------------------------------------------------------------------------------------------------------------------------------------------------------------------------------------------------------------------------------------------------------------------------------------------------------------------------------------------------------------------------------------------------------------------------------------------------------------------------------------------------------------------------------------------------------------------------------------------------------------------------------------------------------------------------------------------------------------------------------|
|                     | conscience de soi et de son environnement.                                                                                                                                                                                                                                                                                                                                                                                                                                                                                                                                                                                                                                                                                                                                                                                                  |
| VIH/SIDA            | Maladie infectieuse causée par le virus de l'immunodéficience humaine (VIH) qui affecte/endommage le système immunitaire et entraîne le syndrome immunodéficitaire acquis (SIDA), une maladie chronique et potentiellement mortelle ; il se transmet par les liquides corporels infectieux comme le sang/le sperme/les autres fluides corporels. Les symptômes courants d'une infection aiguë/précoce sont fièvre, fatigue, maux de tête, douleurs articulaires, éruption cutanée, maux de gorge, ganglions lymphatiques enflés, diarrhée, perte de poids, candidose orale et zona. La maladie non traitée évolue en SIDA ; les symptômes causés par un système immunitaire gravement endommagé sont sueurs, fièvre récurrente, diarrhée chronique, lésions sur la langue et dans la bouche, fatigue, perte de poids et éruptions cutanées. |
| Visiteur            | Personne (apparentée ou non) qui rend visite à un ménage pour passer du temps avec les membres du ménage ; un visiteur ne vit pas avec les membres du ménage dans la même unité d'habitation, ne partage pas les mêmes installations domestiques, la même nourriture et autres éléments essentiels à la vie que les membres du ménage, et ne constitue pas une unité avec les membres du ménage.                                                                                                                                                                                                                                                                                                                                                                                                                                            |
| Voisin              | Personne (apparentée ou non) vivant dans l'habitation à côté de celle d'un ménage cible ; un voisin ne vit pas avec les membres d'un ménage (à côté) dans la même unité d'habitation, ne partage pas les mêmes installations domestiques, aliments ou autres éléments essentiels à la vie que les membres du ménage (à côté), et ne constitue pas une unité avec les membres du ménage (à côté).                                                                                                                                                                                                                                                                                                                                                                                                                                            |
| Vomissements/Nausée | Sensation de malaise dans l'estomac avec tendance à vomir ; fait d'éjecter une partie/tout le contenu de l'estomac principalement par la bouche.                                                                                                                                                                                                                                                                                                                                                                                                                                                                                                                                                                                                                                                                                            |
| <b>W/X/Y/Z</b>      |                                                                                                                                                                                                                                                                                                                                                                                                                                                                                                                                                                                                                                                                                                                                                                                                                                             |



## Formulaires de l'étude

Site \_\_\_\_ Sous-zone \_\_\_\_ Numéro d'habitation \_\_\_\_ Identifiant de l'enquêteur \_\_\_\_

### FORMULAIRE 1 – COMPTE RENDU DES VISITES AUX MÉNAGES

#### Instructions pour l'enquêteur

- Compléter « Formulaire 1 – COMPTE RENDU DES VISITES AUX MÉNAGES » pour chaque ménage visité.
- Compléter « Foyer/Personne interrogée/Complété » une fois que toutes les parties de l'enquête ont été complétées ; si toutes les données n'ont pas été recueillies lors de la visite initiale et/ou d'une visite ultérieure (max. 3 visites), programmer une nouvelle visite.
- **Tentative 1:** Compléter le statut de la visite au ménage et utilisant les choix proposés ; pour « pas à la maison », « à la maison/ne répond pas » et « à la maison/répond/indisponible », programmer une nouvelle visite ; pour « à la maison/répond/refus » indiquez la raison de refus et visitez un ménage de remplacement au plus proche à droite ou à gauche de ce ménage; pour « inexistant/pas d'habitation », passer ce ménage et visiter un ménage de remplacement au plus proche à droite ou à gauche à la place de ce ménage.
- **Tentative 2:** Compléter le statut de la visite du ménage et utilisant les choix proposés ; pour « pas à la maison », « à la maison/ne répond pas » et « à la maison/répond/indisponible », programmer une nouvelle visite.
- **Tentative 3:** Compléter le statut de la visite au ménage et utilisant les choix proposés ; pour « pas à la maison », « à la maison/ne répond pas » et « à la maison/répond/indisponible », passer ce ménage et visiter un ménage de remplacement au plus proche à droite ou à gauche à la place de ce ménage.
- « Site » et « sous-zone » doivent être un numéro à trois chiffres, « numéro d'habitation » un numéro à quatre chiffres, et « identifiant de l'enquêteur » un numéro à deux chiffres (utiliser les listes préparées individuellement pour chaque site pour obtenir les codes) ; saisir « date » au format JJ/MM/AAAA et « heure » au format HH:MM et entourer MATIN ou APRÈS-MIDI. «Étiquette de l'étude» doit être une combinaison d'un code «site» à trois chiffres, d'un code «sous-zone» à trois chiffres et d'un code «numéro d'habitation» à quatre chiffres; le « identifiant de l'enquêteur » doit être un numéro à trois chiffres.

| Tentative 1                            | Date ____/____/____<br>(JJ/MM/AA) | Heure ____/____<br>MATIN/APRÈS-MIDI | Identifiant de l'enquêteur ____                                                                                                                                                                                                                                                                                                                                                                                                   |
|----------------------------------------|-----------------------------------|-------------------------------------|-----------------------------------------------------------------------------------------------------------------------------------------------------------------------------------------------------------------------------------------------------------------------------------------------------------------------------------------------------------------------------------------------------------------------------------|
| STATUT                                 |                                   | Cocher un                           |                                                                                                                                                                                                                                                                                                                                                                                                                                   |
| 1=Pas à la maison                      |                                   | <input type="radio"/>               | ► Planifier nouvelle visite (date/heure)                                                                                                                                                                                                                                                                                                                                                                                          |
| 2=À la maison/ Non-répondant           |                                   | <input type="radio"/>               | ► Planifier nouvelle visite (date/heure)                                                                                                                                                                                                                                                                                                                                                                                          |
| 3=À la maison/ répondant /Indisponible |                                   | <input type="radio"/>               | ► Planifier nouvelle visite (date/heure)                                                                                                                                                                                                                                                                                                                                                                                          |
| 4= À la maison/ Répondant /Complété    |                                   | <input type="radio"/>               |                                                                                                                                                                                                                                                                                                                                                                                                                                   |
| 5= À la maison/ répondant /Refus       |                                   | <input type="radio"/>               | Notez la/les raison(s) du refus; cochez tout ce que s'applique:<br><input type="radio"/> 1=Pas de temps pour répondre aux questions<br><input type="radio"/> 2=Ne veulent pas participer/répondre aux questions<br><input type="radio"/> 3=Autre _____<br><input type="radio"/> 99=Pas de réponse <input type="radio"/> 98=Ne sait pas<br>► Visitez un ménage de remplacement le plus proche de ce ménage du côté droit ou gauche |
| 6=Inexistant/Pas une habitation        |                                   | <input type="radio"/>               | ► Visitez un ménage de remplacement le plus proche de ce ménage du côté droit ou gauche                                                                                                                                                                                                                                                                                                                                           |

| <b>Tentative 2</b>                | Date ____/____/____<br>(JJ/MM/AA) | Heure ____/____<br>MATIN/APRÈS-MIDI                                                                                                                                                                                                                                                                                                                                                                                               | Identifiant de l'enquêteur ____ ____ |
|-----------------------------------|-----------------------------------|-----------------------------------------------------------------------------------------------------------------------------------------------------------------------------------------------------------------------------------------------------------------------------------------------------------------------------------------------------------------------------------------------------------------------------------|--------------------------------------|
| STATUT                            |                                   | Cocher un                                                                                                                                                                                                                                                                                                                                                                                                                         |                                      |
| 1=Pas à la maison                 | <input type="radio"/>             | ➡ Planifier nouvelle visite (date/heure)                                                                                                                                                                                                                                                                                                                                                                                          |                                      |
| 2=À la maison/Ne répond pas       | <input type="radio"/>             | ➡ Planifier nouvelle visite (date/heure)                                                                                                                                                                                                                                                                                                                                                                                          |                                      |
| 3=À la maison/Répond/Indisponible | <input type="radio"/>             | ➡ Planifier nouvelle visite (date/heure)                                                                                                                                                                                                                                                                                                                                                                                          |                                      |
| 4= À la maison/Répond/Complété    | <input type="radio"/>             |                                                                                                                                                                                                                                                                                                                                                                                                                                   |                                      |
| 5= À la maison/ répondant /Refus  | <input type="radio"/>             | Notez la/les raison(s) du refus; cochez tout ce que s'applique:<br><input type="radio"/> 1=Pas de temps pour répondre aux questions<br><input type="radio"/> 2=Ne veulent pas participer/répondre aux questions<br><input type="radio"/> 3=Autre _____<br><input type="radio"/> 99=Pas de réponse <input type="radio"/> 98=Ne sait pas<br>➡ Visitez un ménage de remplacement le plus proche de ce ménage du côté droit ou gauche |                                      |
| 6=Inexistant/Pas une habitation   | <input type="radio"/>             | ➡ Visitez un ménage de remplacement le plus proche de ce ménage du côté droit ou gauche                                                                                                                                                                                                                                                                                                                                           |                                      |
| <b>Tentative 3</b>                | Date ____/____/____<br>(JJ/MM/AA) | Heure ____/____<br>MATIN/APRÈS-MIDI                                                                                                                                                                                                                                                                                                                                                                                               | Identifiant de l'enquêteur ____ ____ |
| STATUT                            |                                   | Cocher un                                                                                                                                                                                                                                                                                                                                                                                                                         |                                      |
| 1=Pas à la maison                 | <input type="radio"/>             | ➡ Visitez un ménage de remplacement le plus proche de ce ménage du côté droit ou gauche                                                                                                                                                                                                                                                                                                                                           |                                      |
| 2=À la maison/Ne répond pas       | <input type="radio"/>             | ➡ Visitez un ménage de remplacement le plus proche de ce ménage du côté droit ou gauche                                                                                                                                                                                                                                                                                                                                           |                                      |
| 3=À la maison/Répond/Indisponible | <input type="radio"/>             | ➡ Visitez un ménage de remplacement le plus proche de ce ménage du côté droit ou gauche                                                                                                                                                                                                                                                                                                                                           |                                      |
| 4= À la maison/Répond/Complété    | <input type="radio"/>             |                                                                                                                                                                                                                                                                                                                                                                                                                                   |                                      |
| 5= À la maison/ répondant /Refus  | <input type="radio"/>             | Notez la/les raison(s) du refus; cochez tout ce que s'applique:<br><input type="radio"/> 1=Pas de temps pour répondre aux questions<br><input type="radio"/> 2=Ne veulent pas participer/répondre aux questions<br><input type="radio"/> 3=Autre _____<br><input type="radio"/> 99=Pas de réponse <input type="radio"/> 98=Ne sait pas<br>➡ Visitez un ménage de remplacement le plus proche de ce ménage du côté droit ou gauche |                                      |
| 6=Inexistant/Pas une habitation   | <input type="radio"/>             | ➡ Visitez un ménage de remplacement le plus proche de ce ménage du côté droit ou gauche                                                                                                                                                                                                                                                                                                                                           |                                      |

Site \_\_\_\_ Sous-zone \_\_\_\_ Numéro d'habitation \_\_\_\_ Identifiant de l'enquêteur \_\_\_\_

## FORMULAIRE 2 – FORMULAIRE DE CONSENTEMENT

Evaluation des soins de santé à [site SETA and –pays]

### Instructions à l'enquêteur

- Lire le "Formulaire 2 – FORMULAIRE DE CONSENTEMENT" pour le répondant/demander au répondant de lire attentivement le "Formulaire 2 – FORMULAIRE DE CONSENTEMENT" s'il préfère.
- Le répondant tel que défini dans cette enquête est un adulte (ayant l'âge de la majorité spécifique au pays) membre du ménage et responsable des décisions journalières concernant la santé des membres du ménage; il ne doit pas par exemple être un voisin ou un visiteur.
- S'assurer que le répondant a pleinement compris l'objectif, les procédures, les risques et les bénéfices de cette étude avant d'obtenir son consentement à participer.
- Le répondant doit signer le "Formulaire 2 – FORMULAIRE DE CONSENTEMENT"; si le répondant est incapable de signer/analphabète, une empreinte digitale servira en lieu et place de la signature, et un adulte lettré indépendant de l'étude qui servira de témoin (un membre du même ménage ou un voisin par exemple) signera le "Formulaire 2 – FORMULAIRE DE CONSENTEMENT".
- Collecter les informations sur tous les membres du ménage indépendamment du fait qu'ils soient présents ou non au moment de l'entretien; Recueillir l'information sur seulement les individus présents au moment de l'entretien résultera en un biais dans les données.
- Remplir le "Formulaire 2 – FORMULAIRE DE CONSENTEMENT" pour chaque ménage consentant enrôlé dans l'étude.
- Expliquer au répondant qu'il est prévu de revisiter chaque ménage durant une période de 2 ans; à chaque visite, l'équipe de recherche obtiendra un nouveau consentement.
- «Site» et «sous-zone» doivent être un numéro à trois chiffres, «numéro d'habitation» un numéro à quatre chiffres, et «identifiant de l'enquêteur» un numéro à deux chiffres (utiliser les listes préparées individuellement pour chaque site pour obtenir les codes); saisir «date» au format JJ/MM/AAAA et «heure» au format HH:MM et entourer MATIN ou APRÈS-MIDI. «Étiquette de l'étude» doit être une combinaison d'un code «site» à trois chiffres, d'un code «sous-zone» à trois chiffres et d'un code «numéro d'habitation» à quatre chiffres; le «identifiant de l'enquêteur» doit être un numéro à trois chiffres.

### Investigateur principal et co-investigateur de l'étude

[Ajouter les noms de l'investigateur principal et des co-investigateurs de l'étude ainsi que leurs affiliations respectives]

### Introduction

L'Institut International des Vaccins (IVI) et [ajouter l'institution d'affiliation des investigateurs locaux] travaillent ensemble pour examiner les problèmes de santé et le comportement de santé dans votre communauté [ajouter le site SETA-pays], y compris le statu socio-économique, le comportement d'hygiène et d'assainissement et le statut vaccinal des enfants. Nous aimerions mieux comprendre où vous, votre famille et vos voisins cherchez des soins de santé en cas de maladies causant la fièvre/corps chaud et autres chate & symptômes. Cette information nous aidera à savoir à quelle fréquence vous souffrez de maladies causant de la fièvre et les autres liées à la fièvre, fournir une meilleure image des facteurs influençant la transmission de la maladie et l'infection, et à trouver des moyens pour les prévenir et traiter dans votre communauté. Vous, en tant que responsable principal pour le comportement de santé/l'utilisation des soins de santé quotidienne pour les membres de ce ménage, êtes invités à participer parce que vous vivez dans la localité où nous effectuons cette étude. Ce formulaire de consentement sera lu par vous ou pour vous et vous aurez le temps pour prendre votre décision d'accepter ou de refuser de participer à l'étude. S'il vous plaît, demandez aux membres de l'étude d'expliquer tout mot ou toute information que vous ne comprenez pas. On vous donnera en conséquence plus d'informations sur cette étude, y compris ses risques potentiels, les avantages et les inconvénients. Après vous avoir entièrement expliqué l'étude et si vous acceptez de participer, on vous demandera de signer ce formulaire de consentement au nom de tous les membres du ménage. Si vous ne pouvez pas signer le formulaire, nous vous demandons de fournir votre empreinte digitale, et une personne adulte indépendante de l'étude (membre de votre ménage/voisin) signera le formulaire en tant que témoin. Nous allons vous remettre une copie signée et datée du formulaire de consentement.

### Objectif

L'objectif de cette étude est d'examiner les problèmes de santé et l'utilisation des soins de santé dans votre communauté [ajouter le site SETA-pays], y compris le statu socio-économique et le comportement d'hygiène et d'assainissement. Notre objectif est de mieux comprendre où vous, votre famille et vos voisins cherchez les soins de santé pour des maladies causant de la fièvre/corps chaud et autres chate & symptômes. Cette

information permettra de mieux estimer le fardeau des maladies communes et d'identifier les moyens pour la mise en place de mesures de prévention et de traitement pour les maladies.

### Procédures

Nous visiterons environ [ajouter le nombre pour site d'étude et pays] ménages au total à [ajouter le site et pays] et poserons les mêmes questions dans chaque ménage. Votre ménage a été choisi pour cette étude simplement par hasard. Si vous acceptez de participer, nous vous poserons, au nom de tous les membres du ménage, quelques questions au sujet de votre ménage tels que les initiales, le sexe et l'âge de chaque membre. Nous aimerions savoir certaines informations relatives à l'éducation et l'occupation du chef de ménage, au revenu, à la possession de biens, au logement lui-même ainsi qu'à l'hygiène et à l'assainissement dans le contexte de l'hygiène personnelle, de la préparation et de la manipulation des aliments, des sources d'eau et de la manipulation, de l'élimination des déchets, de la manipulation des animaux de ferme et domestiques ainsi que de l'élevage de ce ménage. Nous allons également demander où les membres de votre ménage obtiennent les soins si quelqu'un a une maladie causant de la fièvre ou toute autre maladie et les facteurs qui peuvent influencer sur l'utilisation des soins de santé des membres du ménage (c'est-à-dire les modalités de transport, la disponibilité d'assurance maladie, les facteurs culturels) en plus du statut vaccinal et de la perception de certaines maladies. Enfin, nous allons mesurer la position géographique de votre maison. Il n'y a pas de bonnes ou de mauvaises réponses. Vous êtes libre de choisir les questions à répondre. Somme toute, il devrait prendre environ 30-45 minutes pour répondre à toutes les questions. L'entretien peut prendre un peu plus de temps s'il y a beaucoup de membres dans ce ménage. En outre, nous visiterons votre ménage deux fois en différentes saisons (une fois pendant la saison sèche et une fois vers la fin de la saison des pluies) pendant la période totale de l'étude qui est de deux ans environ pour recueillir des données comme décrit dans ce paragraphe du formulaire de consentement.

### Participation

Vous, le décideur principal pour le comportement de santé quotidienne et l'utilisation des soins de santé dans ce ménage, ainsi que les membres de votre ménage, êtes libres de choisir d'accepter ou de refuser de participer à l'étude. Il n'y a aucun problème si vous ne voulez pas participer. Il n'y a non plus aucun problème si vous voulez arrêter votre participation à tout moment, et cela ne causera aucun tort à vous ou aux membres de votre ménage. Donc, la participation à cette étude est volontaire, et vous êtes libre de refuser de participer à l'étude ou vous pouvez retirer votre consentement à tout moment sans donner de raisons et ceci n'entraînera aucune pénalité.

### Risques et avantages

La participation à cette étude n'entraîne pas de risque direct. Poser des questions au sujet de votre ménage peut mettre mal à l'aise vous ou les membres de votre ménage. Après avoir terminé les questions, l'équipe de recherche pourra fournir des informations sur les soins de santé communautaires pour les participants qui expriment de la détresse. Vous pouvez refuser de répondre à toute question à tout moment. Vous pouvez faire une pause ou arrêter de participer à cette étude à tout moment. Il n'y a pas d'avantages directs à être dans cette étude. Au cours des visites de votre ménage, notre équipe de recherche peut identifier les membres de votre ménage qui devraient chercher des soins de santé pour les maladies causant de la fièvre et autres. Par conséquent, elle peut aider à fournir de l'information sur l'offre de soins établie dans votre communauté. Les avantages indirects sont que toutes les informations collectées contribueront à fournir des données exactes sur les problèmes de santé, y compris le statu socio-économique, le comportement d'hygiène et d'assainissement et le statut vaccinal des enfants dans votre communauté. Cela aidera à donner une meilleure compréhension des facteurs influençant la transmission de la maladie et l'infection, et à estimer le fardeau des maladies courantes ainsi qu'à trouver des moyens de prévenir et de traiter les personnes dans votre communauté.

### Coûts et Compensations

Il n'a pas de coûts pour les participants de cette étude. Ni vous ni aucune personne de votre ménage ne sera indemnisée d'avoir participé.

### Confidentialité

Tous les fichiers de l'étude et de toutes les informations qui identifient vous et les membres de votre ménage seront gardées confidentielles. Tous les questionnaires sur papier seront gardés en toute sécurité et les fichiers informatisés seront protégés par un mot de passe; tous les fichiers de données (sur papier/informatisés) seront stockés pour un minimum de cinq ans; ces fichiers seront accessibles seulement à quelques personnes autorisées de l'étude. Ni votre nom ni aucun identifiant ne sera utilisé dans les publications ou les rapports de

cette étude. Les informations que nous collectons à votre sujet et au sujet des membres de votre ménage seront partagées uniquement avec le personnel de l'étude autorisé et des représentants du comité d'éthique.

### Personnes de contact pour des questions

Si vous ou des membres de votre ménage avez des questions, s'il vous plaît, demandez maintenant à l'équipe de recherche ou à tout moment plus tard en contactant [ajouter le nom de l'investigateur principal et/ou du co-investigateur, leurs affiliations respectives et les numéros de téléphone]. Si vous avez des questions sur vos droits ou ceux des membres du ménage en tant que participant à l'étude, vous pouvez contacter [ajouter le nom et les coordonnées du comité d'éthique local].

### Déclaration de consentement

Ce formulaire de consentement pour participer à l'évaluation des soins de santé et d'autres facteurs liés à la population à [ajouter le site et pays] a été bien lu par moi/pour moi. L'objectif, les procédures, les risques et les avantages ont m'ont été expliqués en détails. J'ai été autorisé à poser des questions à tout moment, et mes questions ont été répondues à ma satisfaction par l'équipe de recherche. On m'a dit la personne à contacter en cas de questions ou si je veux discuter de problèmes ou préoccupations. On m'a dit que je recevrai une copie signée et datée de ce formulaire de consentement. Je suis rassuré que toutes les informations obtenues par suite de cette étude seront gardées confidentielles et utilisées uniquement aux fins de cette étude, et seulement par les institutions participantes.

Moi, le répondant, consens, par la présente, volontairement à participer à cette étude. Je suivrai les instructions de l'équipe de recherche et donnerai mon entière collaboration. Je comprends que j'ai le droit de me retirer de l'étude à tout moment.

#### RÉPONDANT

Nom : \_\_\_\_\_  
(prénom + deuxième prénom (si disponible) + nom de famille)

Signature : \_\_\_\_\_  
(Représentation manuscrite du nom/ marque que la personne écrit sur un document comme une preuve d'identité)

Date \_\_\_\_/\_\_\_\_/\_\_\_\_ (YY/MM/AAAA)

Empreinte du  
pouce

Si le répondant ne peut pas signer/est analphabète, mais accepte de participer, enregistre l'empreinte du pouce dans la boîte ci-dessus, et demande à un témoin adulte, alphabétisé et indépendant de l'étude (par exemple membre du même ménage ou un voisin), de signer ci-dessous :

#### TÉMOIN

Nom : \_\_\_\_\_  
(prénom + deuxième prénom (si disponible) + nom de famille)

Signature : \_\_\_\_\_  
(Représentation manuscrite du nom/ marque que la personne écrit sur un document comme une preuve d'identité)

Date \_\_\_\_/\_\_\_\_/\_\_\_\_ (YY/MM/AAAA)

Moi, l'enquêteur, j'ai lu/expliqué l'étude au répondant nommé ci-dessus (témoin si le répondant est analphabète) dans une langue que le répondant comprend bien. Je suis certain que le répondant a compris l'information et accepte qu'on lui pose des questions.

#### INTERVIEWER

Nom : \_\_\_\_\_  
(prénom + deuxième prénom (si disponible) + nom de famille)

Signature : \_\_\_\_\_  
(Représentation manuscrite du nom/ marque que la personne écrit sur un document comme une preuve d'identité)

Date \_\_\_\_/\_\_\_\_/\_\_\_\_ (YY/MM/AAAA)

Site \_\_\_\_ Sous-zone \_\_\_\_ Numéro d'habitation \_\_\_\_ Identifiant de l'enquêteur \_\_\_\_

### FORMULAIRE 3: INFORMATIONS GÉNÉRALES SUR LE MÉNAGE

#### Instructions pour l'enquêteur

- Compléter ce formulaire uniquement si la personne interrogée a consenti à participer (voir « Formulaire 2 — FORMULAIRE DE CONSENTEMENT ») ; la personne interrogée ainsi que définie pour cette enquête est un adulte (selon l'âge légal de majorité du pays), un membre du ménage et un décideur en ce qui concerne les soins de santé quotidiens et l'utilisation de soins de santé pour le ménage entier et ses membre ; il ne doit pas être, par exemple, un voisin ou un visiteur.
- Recueillir les données de tous les membres du ménage que tous les membres du ménage soient présents ou non au moment de l'entretien ; ne recueillir et n'inscrire les données que des personnes présentes au moment de l'entretien fausserait les données.
- Un ménage est défini/les membres d'un ménage sont définis comme une personne ou un groupe de personnes avec ou sans lien de parenté qui vivent ensemble dans la même unité d'habitation, qui reconnaissent un adulte de sexe masculin ou féminin comme chef de ménage, qui partagent les mêmes installations domestiques, qui sont considérés comme constituant une unité, et qui subviennent à leurs besoins en termes de nourriture et des autres éléments essentiels pour vivre.
- « Site » et « sous-zone » doivent être un numéro à trois chiffres, « numéro d'habitation » un numéro à quatre chiffres, et « identifiant de l'enquêteur » un numéro à deux chiffres (utiliser les listes préparées individuellement pour chaque site pour obtenir les codes) ; saisir « date » au format JJ/MM/AAAA et « heure » au format HH:MM et entourer MATIN ou APRÈS-MIDI. «Étiquette de l'étude» doit être une combinaison d'un code «site» à trois chiffres, d'un code «sous-zone» à trois chiffres et d'un code «numéro d'habitation» à quatre chiffres; le « identifiant de l'enquêteur » doit être un numéro à trois chiffres.

### FORMULAIRE 3: INFORMATIONS GÉNÉRALES SUR LE MÉNAGE

#### PARTIE A – DONNÉES DÉMOGRAPHIQUES/ INFORMATIONS GÉNÉRALES SUR LE MÉNAGE

#### EMPLACEMENT DU DOMICILE

##### 1 Numéros de site, de sous-zone et d'habitation

*Instructions :* Site (=site d'étude) et sous-zone (=plus petite unité du site d'étude) doivent être tous les deux des numéros à trois chiffres, et numéro d'habitation doit être un code à quatre chiffres ; utiliser les listes préparées individuellement pour obtenir les codes respectifs.

Site: \_\_\_\_ Sous-zone: \_\_\_\_ Numéro d'habitation: \_\_\_\_

##### 2 Coordonnées GPS

*Instructions :* Prendre les coordonnées GPS approximativement au centre de la maison. Inscrire l'altitude par un nombre à quatre chiffres (unité : mètre), et la latitude/longitude par un numéro à huit chiffres (unités : degrés, minutes décimales).

1=Ménage d'origine       2=Ménage de remplacement (côte droit/gauche du ménage d'origine)

Altitude: \_\_\_\_

Latitude: \_\_\_\_° \_\_\_\_'      Longitude: \_\_\_\_° \_\_\_\_'

#### PERSONNE INTERROGÉE

##### 3 Inscrire le nom complet de la personne interrogée.

*Instructions :* Inscrire le prénom, le deuxième nom (le cas échéant) et le nom de famille de la personne interrogée.

##### 4 Inscrire l'âge de la personne interrogée.

*Instruction :* Utiliser un numéro à trois chiffres (unité: année).      \_\_\_\_

##### 5 Inscrire le sexe de la personne interrogée.

1=Masculin       2=Féminin

##### 6 Quel est le lien de la personne interrogée avec le ménage ?

1=Chef de ménage       7=Conjoint du chef de ménage  
 2=Fils/fille du chef de ménage       8=Conjoint du fils/fille du chef de ménage

- 3=Frère/sœur du chef de ménage
- 4=Mère/père du chef de ménage
- 5=Petite-fille/petit-fils du chef de ménage
- 6=Autre, préciser \_\_\_\_\_
- 9=Conjoint du frère/sœur du chef de ménage
- 10=Belle-mère/beau-père du chef de ménage
- 11=Nièce/neveu du chef de ménage
- 98=Pas de réponse

**MEMBRES DU MÉNAGE**

**7 Combien de membres du ménage vivent dans ce domicile au total (au moment de la visite) ?**

*Instruction* : Utiliser un numéro à deux chiffres.

Nombre total de membres du ménage : \_\_\_\_

**8 Inscrire l'âge et le sexe de chaque membre du ménage.**

*Instructions* : Inscrire les initiales, l'âge et le sexe de la personne interrogée en première position/ligne du tableau. Les initiales, l'âge et le sexe de tous les autres membres du ménage doivent être inscrits ensuite. Les initiales d'un membre du ménage consistent en les trois premières lettres du prénom et les trois première lettre du nom de famille (un éventuel deuxième nom ne fait pas partie des initiales). Inscrire l'âge de chaque membre du ménage avec un numéro à trois chiffres (unité : années) ; si l'âge d'un des membres du ménage  $\leq 12$  mois, inscrire 1 an comme âge. Merci de compléter un formulaire supplémentaire si le ménage a plus de vingt membres.

| Membre du ménage<br>Identifiant | Initiales<br>[prénom/nom de famille] | Âge<br>[années] | Sexe                   |
|---------------------------------|--------------------------------------|-----------------|------------------------|
| 1/Personne interrogée           | ____/____                            | ____            | O1=Masculin O2=Féminin |
| 2                               | ____/____                            | ____            | O1=Masculin O2=Féminin |
| 3                               | ____/____                            | ____            | O1=Masculin O2=Féminin |
| 4                               | ____/____                            | ____            | O1=Masculin O2=Féminin |
| 5                               | ____/____                            | ____            | O1=Masculin O2=Féminin |
| 6                               | ____/____                            | ____            | O1=Masculin O2=Féminin |
| 7                               | ____/____                            | ____            | O1=Masculin O2=Féminin |
| 8                               | ____/____                            | ____            | O1=Masculin O2=Féminin |
| 9                               | ____/____                            | ____            | O1=Masculin O2=Féminin |
| 10                              | ____/____                            | ____            | O1=Masculin O2=Féminin |
| 11                              | ____/____                            | ____            | O1=Masculin O2=Féminin |
| 12                              | ____/____                            | ____            | O1=Masculin O2=Féminin |
| 13                              | ____/____                            | ____            | O1=Masculin O2=Féminin |
| 14                              | ____/____                            | ____            | O1=Masculin O2=Féminin |
| 15                              | ____/____                            | ____            | O1=Masculin O2=Féminin |
| 16                              | ____/____                            | ____            | O1=Masculin O2=Féminin |
| 17                              | ____/____                            | ____            | O1=Masculin O2=Féminin |
| 18                              | ____/____                            | ____            | O1=Masculin O2=Féminin |
| 19                              | ____/____                            | ____            | O1=Masculin O2=Féminin |
| 20                              | ____/____                            | ____            | O1=Masculin O2=Féminin |

**FORMULAIRE 3: INFORMATIONS GÉNÉRALES SUR LE MÉNAGE**  
**PARTIE B – DONNÉES SOCIO-ECONOMIQUES**

**ÉDUCATION**

- 1 Le chef de ménage sait-il lire en [inscrire la langue officielle du site d'étude/pays] ?**  
 1=Oui       2=Non       99=Ne sait pas       98=Pas de réponse
- 2 Le chef de ménage sait-il écrire en [inscrire la langue officielle du site d'étude/pays] ?**  
 1=Oui       2=Non       99=Ne sait pas       98=Pas de réponse
- 3 Quel est le niveau d'éducation scolaire le plus élevé atteint par le chef de ménage ?**  
 1=École primaire       4=Plus élevé que le lycée       99=Ne sait pas  
 2=Collège       5= PAS D'ÉDUCATION       98=Pas de réponse  
 3=Lycée       6=Autre, préciser \_\_\_\_\_

**PROFESSION/RESSOURCES FINANCIÈRES**

**4 Quelle est la profession principale du chef de ménage ?**

*Instructions : Inscrire le statut du jour de visite uniquement.*

- 1=Groupe 1 : Cadres  
 (directeurs généraux, hauts fonctionnaires, législateurs ; cadres administratifs et commerciaux ; responsables de production et de services spécialisés ; responsables dans l'hôtellerie, la vente et d'autres services)
- 2=Groupe 2 : Professionnels  
 (scientifiques ou ingénieurs ; professionnels de santé ; professionnels de l'enseignement ; professionnels de l'administration et des affaires ; professionnels de l'information et des technologies de communication ; professionnels du droit, du social ou de la culture)
- 3=Groupe 3 : Techniciens et professions intermédiaires  
 (Professions intermédiaires des sciences et techniques ; professions intermédiaires de la santé ; professions intermédiaires de l'administration et des affaires ; professions intermédiaires du droit, du social, de la culture et assimilés ; techniciens de l'information et des communications)
- 4=Groupe 4 : Employés de bureau  
 (secrétaires et dactylographes ; employé de service clientèle ; employé de conservation des données et de la documentation ; autres employés de bureau)
- 5=Groupe 5 : Travailleurs des services et de la vente  
 (travailleurs du service aux personnes ; travailleurs de la vente ; travailleurs des soins aux personnes ; travailleurs des services de protection)
- 6=Groupe 6 : Travailleurs qualifiés de l'agriculture, la sylviculture et la pêche  
 (travailleurs qualifiés de l'agriculture orientés marché ; éleveurs d'animaux ; travailleurs qualifiés de la sylviculture, la pêche et la chasse orientés marché ; agriculteurs, pêcheurs, chasseurs et cueilleurs de subsistance)
- 7=Groupe 7 : Travailleurs manuels et assimilés  
 (travailleurs de la construction et assimilés (à l'exception des électriciens) ; travailleurs de la métallurgie, sur machines et assimilés ; artisans et travailleurs de l'imprimerie ; travailleurs des métiers de l'électricité et de l'électronique ; travailleurs des métiers de la transformation des aliments, du bois, des vêtements et assimilés)
- 8=Groupe 8 : Opérateurs de machines et d'installations, et monteurs  
 (Opérateurs de machines et d'installations fixes ; monteurs ; conducteurs opérateurs d'installations mobiles)
- 9=Groupe 9 : Emplois non qualifiés  
 (agents d'entretien et assistants ; ouvriers de l'agriculture, la sylviculture et la pêche ; travailleurs des mines, de la construction, de l'industrie et des transports ; assistants à la préparation des aliments ; vendeurs et services de rue et assimilés ; travailleurs de la collecte des ordures et autres travailleurs non qualifiés)
- 10=Groupe 0 : Professions des forces armées  
 (officiers des forces armées ; sous-officiers des forces armées ; professions des forces armées, autres grades)
- 11=Autre, préciser \_\_\_\_\_
- 12=PAS DE PROFESSION       99=Ne sait pas       98=Pas de réponse



**5 Quel est le montant moyen des revenus mensuels du chef de ménage en lien avec à la profession indiquée en question 4 ainsi que celui des autres membre du ménage ?**

*Instruction* : Tick one answer per household head/enter one code per household member if applicable/if income available.

| Chef de ménage                    | Membre 1                                 | Membre 2                                                   | Membre 3                                |
|-----------------------------------|------------------------------------------|------------------------------------------------------------|-----------------------------------------|
| Code _____                        | Code _____                               | Code _____                                                 | Code _____                              |
| [1] <100USD<br>[2] ≥100 à <150USD | [3] ≥150 à <200USD<br>[4] ≥200 à <250USD | [5] ≥250USD<br>[6] PAS DE REVENU (chef de ménage; voir Q4) | [99] Ne sait pas<br>[98] Pas de réponse |

**6 Quels sont les autres sources ou les sources supplémentaires de revenus mensuels du ménage et quel en est le montant ?**

*Instruction* : Cocher plusieurs cases si nécessaire ; il peut y avoir plus d'une réponse.

| Autres sources/Sources supplémentaires                                                                                                                                                                                                                                                                                                                             | Revenus financiers mensuels globaux                                                                                                                                                                   |
|--------------------------------------------------------------------------------------------------------------------------------------------------------------------------------------------------------------------------------------------------------------------------------------------------------------------------------------------------------------------|-------------------------------------------------------------------------------------------------------------------------------------------------------------------------------------------------------|
| <input type="radio"/> 1=Aides sociales<br><input type="radio"/> 2=Assurances (publiques ou privées)<br><input type="radio"/> 3=Prêt (d'amis, de membres de la famille, d'une banque)<br><input type="radio"/> 4=Vente (bétail, récoltes, meubles, autres biens)<br><input type="radio"/> 5=Économies personnelles<br><input type="radio"/> 6=Autre, préciser _____ | <input type="radio"/> 1=<100 USD<br><input type="radio"/> 2=≥100 à <150 USD<br><input type="radio"/> 3=≥150 à <200 USD<br><input type="radio"/> 4=≥200 à <250 USD<br><input type="radio"/> 5=≥250 USD |
| <input type="radio"/> 7=PAS D'AUTRES SOURCES/DE SOURCES SUPPLÉMENTAIRES<br><input type="radio"/> 99=Ne sait pas<br><input type="radio"/> 98=Pas de réponse                                                                                                                                                                                                         |                                                                                                                                                                                                       |

### LOGEMENT/HABITATION

**7 Les membres du ménage sont-ils propriétaires de l'habitation ?**

- 1=Oui       2=Non, locataires       3=Non, logement fourni (par le gouvernement, un employeur)       4=Non, autres, préciser \_\_\_\_\_  
 99=Ne sait pas  
 98=Pas de réponse

**8 Combien de pièces ou structures individuelles de l'habitation sont utilisées pour dormir, vivre, faire la cuisine ou se laver ?**

*Instruction* : N'indiquer qu'un code par catégorie.

| Chambre            | Salon                | Cuisine                                 | Salle de bain |
|--------------------|----------------------|-----------------------------------------|---------------|
| Code _____         | Code _____           | Code _____                              | Code _____    |
| [1] 1-2<br>[2] 3-4 | [2] >4<br>[2] Aucune | [99] Ne sait pas<br>[98] Pas de réponse |               |

**9 En quel matériau sont construits le sol, les murs et le toit des pièces/des structures individuelles de l'habitation ?**

*Instruction* : Indiquer tous les codes par catégorie ; plus d'une réponse par catégorie est possible.

| Sol                            | Murs                                           | Toit                                                     |
|--------------------------------|------------------------------------------------|----------------------------------------------------------|
| Code _____                     | Code _____                                     | Code _____                                               |
| [1] Brique<br>[2] Ciment/Béton | [3] Tuiles<br>[4] Terre<br>[6] Paille/feuilles | [5] Bois<br>[7] Métal/Étain<br>[8] Autre, préciser _____ |
|                                |                                                | [99] Ne sait pas<br>[98] Pas de réponse                  |

**10 Les membres de ce ménage ont-ils accès à/utilisent-ils l'électricité dans cette habitation ?**

- 1=Oui       2=Non       99=Ne sait pas       98=Pas de réponse

**11 À quelle source de lumière principale les membres de ce ménage ont-ils accès/Quelle source de lumière principale utilisent-ils ?**

- 1=Lumière/ampoule(s) électrique(s)       2=Lumière du soleil/Lampe(s) solaire(s)  
 3=Lampe(s) à pétrole/à huile       4=Lampe(s) à piles       5=Bougie(s)  
 6=PAS DE SOURCE DE LUMIÈRE       7= Autre, préciser \_\_\_\_\_  
 99=Ne sait pas  
 98=Pas de réponse

**BIENS DU MÉNAGE****12 Parmi les articles suivants, lesquels les membres du ménage possèdent-ils ?**

*Instructions* : Cocher plusieurs cases si nécessaire ; il peut y avoir plus d'une réponse ; indiquer la quantité d'articles fonctionnels si nécessaire

|                                             |               |                            |                                                                 |               |                            |
|---------------------------------------------|---------------|----------------------------|-----------------------------------------------------------------|---------------|----------------------------|
| <input type="radio"/> 1=Radio               | Quantité ____ | <input type="radio"/> Rien | <input type="radio"/> 11=Lecteur cassettes/CD                   | Quantité ____ | <input type="radio"/> Rien |
| <input type="radio"/> 2=Télévision          | Quantité ____ | <input type="radio"/> Rien | <input type="radio"/> 12=Ordinateur de bureau/portable/tablette | Quantité ____ | <input type="radio"/> Rien |
| <input type="radio"/> 3=Connexion internet  | Quantité ____ | <input type="radio"/> Rien | <input type="radio"/> 13=Téléphone portable                     | Quantité ____ | <input type="radio"/> Rien |
| <input type="radio"/> 4=Voiture             | Quantité ____ | <input type="radio"/> Rien | <input type="radio"/> 14=Camion/bus                             | Quantité ____ | <input type="radio"/> Rien |
| <input type="radio"/> 5=Moto                | Quantité ____ | <input type="radio"/> Rien | <input type="radio"/> 15=Vélo                                   | Quantité ____ | <input type="radio"/> Rien |
| <input type="radio"/> 6=Char à bœufs/ânes   | Quantité ____ | <input type="radio"/> Rien | <input type="radio"/> 16=Lit                                    | Quantité ____ | <input type="radio"/> Rien |
| <input type="radio"/> 7=Matelas             | Quantité ____ | <input type="radio"/> Rien | <input type="radio"/> 17=Moustiquaire                           | Quantité ____ | <input type="radio"/> Rien |
| <input type="radio"/> 8=Table               | Quantité ____ | <input type="radio"/> Rien | <input type="radio"/> 18=Chaise                                 | Quantité ____ | <input type="radio"/> Rien |
| <input type="radio"/> 9=Réfrigérateur (4°C) | Quantité ____ | <input type="radio"/> Rien | <input type="radio"/> 19=Congélateur (-20°C)                    | Quantité ____ | <input type="radio"/> Rien |
| <input type="radio"/> 10=Ventilateur        | Quantité ____ | <input type="radio"/> Rien | <input type="radio"/> 20=Machine à coudre                       | Quantité ____ | <input type="radio"/> Rien |

## FORMULAIRE 3: INFORMATIONS GÉNÉRALES SUR LE MÉNAGE

### Partie C – Hygiène et installations sanitaires

#### TOILETTES

#### 1 À quel type de toilettes les membres du ménage ont-ils habituellement accès ?

*Instruction* : À l'intérieur signifie à l'intérieur d'une pièce/d'une habitation individuelle/d'un bâtiment ; à l'extérieur signifie à l'extérieur d'une pièce/d'une habitation individuelle/d'un bâtiment.

- 1=Toilettes avec chasse d'eau/Cabinets (à l'intérieur)     8=Toilettes à compostage (à l'extérieur)  
 2=Toilettes avec chasse d'eau/Cabinets (à l'extérieur)     9=PAS de toilettes, utilisent un seau  
 3=Latrines sans chasse/latrines à fosse (à l'intérieur)     10=PAS de toilettes, creusent un trou  
 4=Latrines sans chasse/latrines à fosse (à l'extérieur)     11=PAS de toilettes, défécation libre/en plein air  
 5=Latrines à fosse améliorées par une ventilation (KVIP, à l'intérieur)     12=Autre, préciser \_\_\_\_\_  
 6=Latrines à fosse améliorées par une ventilation (KVIP, à l'extérieur)     99=Ne sait pas  
 7=Toilettes à compostage (à l'intérieur)     98=Pas de réponse

#### 2 Les membres du ménage utilisent-ils habituellement les toilettes indiquées à la question 1 ?

- 1=Non, les membres ne peuvent utiliser les toilettes de façon autonome (bébés, enfants en bas-âge)     6= Non, mauvais état (cassé, pas propre)  
 2=Non, les membres ne peuvent utiliser les toilettes de façon autonome (handicapés, malades chroniques/longue durée)     7=OUI  
 3=Non, les membres ne peuvent utiliser les toilettes de façon autonome (personnes âgées)     8=Autre, préciser \_\_\_\_\_  
 4=Non, accès limité (publiques, partagées avec d'autres ménages/communautés)     99=Ne sait pas  
 5=Non, accès limité (publiques, partagées avec d'autres ménages/communautés)     98=Pas de réponse

#### 3 Où sont situées les toilettes indiquées à la question 1 ? Par combien de personnes sont-elles habituellement partagées ?

- 1=Sur la propriété du ménage (privées, non partagées)  
 2=Sur la propriété d'un ménage voisin (privées, partagées)  
*Partagées par*     1=<10 personnes     2=11-24 personnes     3=25-49 personnes  
                            4=>50 personnes     99=Ne sait pas     98=Pas de réponse  
 3=Dans la communauté (publiques, partagées)  
*Partagées par*     1=<10 personnes     2=11-24 personnes     3=25-49 personnes  
                            4=>50 personnes     99=Ne sait pas     98=Pas de réponse  
 4=Autre, préciser \_\_\_\_\_     99=Ne sait pas     98=Pas de réponse

#### 4 Comment les membres du ménage qui ont accès/n'ont pas accès aux toilettes se lavent-ils habituellement les mains tout de suite avant et après avoir uriné/déféqué ?

*Instruction* : Indiquer un code par catégorie uniquement.

| Lavent les mains avant d'avoir uriné/déféqué                     | Lavent les mains après avoir uriné/déféqué   |
|------------------------------------------------------------------|----------------------------------------------|
| Code _____                                                       | Code _____                                   |
| [1] Lavent les mains avec du savon et de l'eau                   | [6] Ne lavent pas, pas besoin/pas sale       |
| [2] Lavent les mains avec de l'eau uniquement                    | [7] Ne lavent pas, rien pour laver les mains |
| [3] Frottent les mains avec des feuilles/de la paille/de l'herbe | [8] Autre, préciser _____                    |
| [4] Frottent les mains avec du sable                             | [99] Ne sait pas                             |
| [5] Frottent les mains avec un chiffon/du tissu                  | [98] Pas de réponse                          |

#### CUISINE/MANIPULATION DES ALIMENTS

#### 5 Les membres de ce ménage ont-ils une cuisine pour faire cuire/préparer la nourriture/les repas ? Où est-elle située ?

- 1=Oui, cuisine intérieure/dans une pièce/structure individuelle d'habitation ; sur la propriété du ménage (privée, non partagée)  
 2=Oui, cuisine extérieure/hors d'une pièce/structure individuelle d'habitation/ en plein air ; sur la propriété du ménage (privée, non partagée)

- 3=Oui, cuisine intérieure/dans une pièce/structure individuelle d'habitation ; sur la propriété d'un ménage voisin (privée, partagée)  
 4=Oui, cuisine extérieure/hors d'une pièce/structure individuelle d'habitation/ en plein air ; sur la propriété d'un ménage voisin (privée, partagée)  
 5=PAS DE CUISINE  
 6=Autre, préciser \_\_\_\_\_  99=Ne sait pas  98=Pas de réponse

**6 Quelle source d'énergie les membres de ce ménage utilisent-ils habituellement pour cuisiner/préparer la nourriture/les repas ?**

- 1=Électricité  3=Charbon de bois  5=Excréments d'animaux  99=Ne sait pas  
 2=Gaz/pétrole  4=Bois/paille/feuilles  6=Autre, préciser \_\_\_\_\_  98=Pas de réponse

**7 Quelle moyen de cuisson les membres de ce ménage utilisent-ils habituellement pour cuisiner/préparer la nourriture/les repas ?**

- 1=Foyer ouvert  3=Fourneau intérieur avec cheminée  99=Ne sait pas  
 2=Fourneau extérieur  4=Autre, préciser \_\_\_\_\_  98=Pas de réponse

**8 Où les membres de ce ménage conservent-ils habituellement les produits alimentaires frais/crus (comme les légumes, la salade, les fruits, les produits laitiers, les œufs, la viande et le poisson) et les restes/les aliments/repas préparés ?**

*Instruction* : Indiquer un code par catégorie uniquement. À l'intérieur signifie à l'intérieur d'une pièce/d'une habitation individuelle/d'un bâtiment ; à l'extérieur signifie à l'extérieur d'une pièce/d'une habitation individuelle/d'un bâtiment.

| Des produits alimentaires frais/crus (légumes, salade, fruits, produits laitiers, œufs, viande et poisson)                                                                                                                                                                                                                                                                                                                                                                                                                                                                                                                                                                                                                          | Des restes/aliments/repas préparés |
|-------------------------------------------------------------------------------------------------------------------------------------------------------------------------------------------------------------------------------------------------------------------------------------------------------------------------------------------------------------------------------------------------------------------------------------------------------------------------------------------------------------------------------------------------------------------------------------------------------------------------------------------------------------------------------------------------------------------------------------|------------------------------------|
| Code _____                                                                                                                                                                                                                                                                                                                                                                                                                                                                                                                                                                                                                                                                                                                          | Code _____                         |
| [1] À température ambiante (à l'intérieur, sur la propriété du ménage, privé)<br>[2] À température ambiante (à l'extérieur, sur la propriété du ménage, privé)<br>[3] À température ambiante (à l'intérieur, sur la propriété d'un ménage voisin, privé, partagé)<br>[4] À température ambiante (à l'extérieur, sur la propriété d'un ménage voisin, privé, partagé)<br>[5] Réfrigérateur (sur la propriété du ménage, privé)<br>[6] Réfrigérateur (sur la propriété d'un ménage voisin, privé, partagé)<br>[7] Congélateur (sur la propriété du ménage, privé)<br>[8] Congélateur (sur la propriété d'un ménage voisin, privé, partagé)<br>[9] Autre, préciser _____ [10] PAS DE CONSERVATION [99] Ne sait pas [98] Pas de réponse |                                    |

**9 Si la réponse à la question 8 au sujet des produits alimentaires frais/crus et/ou des restes/aliments/repas préparés est «température ambiante», combien de temps les membres de ce ménage les conservent-ils habituellement?**

*Instruction*: Indiquer un code par catégorie uniquement.

| Des produits alimentaires frais/crus (légumes, salade, fruits, produits laitiers, œufs, viande et poisson)      | Des restes/aliments/repas préparés |
|-----------------------------------------------------------------------------------------------------------------|------------------------------------|
| Code _____                                                                                                      | Code _____                         |
| [1] <1 jour [3] 3-4 jours [5] Pas applicable [99] Ne sait pas<br>[2] 1-2 jours [4] >4 jours [98] Pas de réponse |                                    |

**10 Les membres de ce ménage couvrent-ils habituellement les restes/aliments/repas préparés? Réchauffent-ils/recuisent-ils les restes/aliments/repas préparés avant de les consommer?**

*Instruction* : Indiquer un code par catégorie uniquement.

| Couvrent les restes/les aliments/repas préparés      | Réchauffent/Recuisent les restes/les aliments/repas préparés |
|------------------------------------------------------|--------------------------------------------------------------|
| Code _____                                           | Code _____                                                   |
| [1] Oui [2] Non [99] Ne sait pas [98] Pas de réponse |                                                              |

**11 Quel membre(s) de ce ménage cuisine(s)/prépare(s) la nourriture/les repas habituellement pour les autres membres de ce ménage ?**

*Instructions :* Se référer à la question 9 du « Formulaire 3 Partie A – Données démographiques/Informations générales sur le ménage » et indiquer les initiales/ Identifiant (s) du membre.

- Membre du ménage, indiquer les initiales/identificateur(s) \_\_\_\_\_  
 99=Ne sait pas  98=Pas de réponse

**12 Comment le(s) membre(s) de la famille qui cuisine(nt)/prépare(nt) la nourriture/les repas habituellement pour les autres membres de ce ménage comme indiqué à la question 11 se prépare(nt)-t-il(s)/elle(s) habituellement avant et après la préparation des repas?**

*Instruction:* Indiquer un code par catégorie uniquement.

| Avant la préparation des repas                                                                                                                                                                                                                                 | Après la préparation des repas                                                                                                                                 |
|----------------------------------------------------------------------------------------------------------------------------------------------------------------------------------------------------------------------------------------------------------------|----------------------------------------------------------------------------------------------------------------------------------------------------------------|
| Code _____                                                                                                                                                                                                                                                     | Code _____                                                                                                                                                     |
| [1] Lavent les mains avec du savon et de l'eau<br>[2] Lavent les mains avec de l'eau uniquement<br>[3] Frottent les mains avec des feuilles/de la paille/de l'herbe<br>[4] Frottent les mains avec du sable<br>[5] Frottent les mains avec un chiffon/du tissu | [6] Ne lavent pas, pas besoin/pas sale<br>[7] Ne lavent pas, rien pour laver les mains<br>[8] Autre, préciser _____<br>[99] Ne sait pas<br>[98] Pas de réponse |

**13 Comment les membres de ce ménage se préparent-ils habituellement avant et après avoir mangé de la nourriture/des repas, y compris le membre du ménage qui cuisine/prépare la nourriture/les repas habituellement comme indiqué à la question 11?**

*Instruction :* Indiquer un code par catégorie uniquement.

| Avant la préparation des repas                                                                                                                                                                                                                                 | Après la préparation des repas                                                                                                                                 |
|----------------------------------------------------------------------------------------------------------------------------------------------------------------------------------------------------------------------------------------------------------------|----------------------------------------------------------------------------------------------------------------------------------------------------------------|
| Code _____                                                                                                                                                                                                                                                     | Code _____                                                                                                                                                     |
| [1] Lavent les mains avec du savon et de l'eau<br>[2] Lavent les mains avec de l'eau uniquement<br>[3] Frottent les mains avec des feuilles/de la paille/de l'herbe<br>[4] Frottent les mains avec du sable<br>[5] Frottent les mains avec un chiffon/du tissu | [6] Ne lavent pas, pas besoin/pas sale<br>[7] Ne lavent pas, rien pour laver les mains<br>[8] Autre, préciser _____<br>[99] Ne sait pas<br>[98] Pas de réponse |

**14 Comment les membres de ce ménage mangent-ils habituellement leur nourriture/leurs repas, y compris le membre du ménage qui cuisine/prépare la nourriture/les repas habituellement comme indiqué à la question 11?**

- 1=Avec des couverts  3=Autre, préciser \_\_\_\_\_  99=Ne sait pas  
 2=Avec les doigts  98=Pas de réponse

**15 Les membres de ce ménage mangent-ils habituellement leur nourriture/leurs repas dans le même récipient, y compris le membre du ménage qui cuisine/prépare la nourriture/les repas habituellement comme indiqué à la question 11?**

- 1=Oui  2=Non  99=Ne sait pas  98=Pas de réponse

**16 Où les membres de ce ménage obtiennent-ils habituellement leurs produits alimentaires frais/crus principaux comme les légumes, les fruits, les grains/céréales, les produits laitiers, les œufs, la viande et le poisson?**

*Instruction :* Indiquer un code par catégorie uniquement.

| Légumes, fruits, grains/céréales                                                                                                        | Produits laitiers                                                                                                                | Œufs, viande, poisson |
|-----------------------------------------------------------------------------------------------------------------------------------------|----------------------------------------------------------------------------------------------------------------------------------|-----------------------|
| Code _____                                                                                                                              | Code _____                                                                                                                       | Code _____            |
| [1] Agriculture vivrière (cour/arrière-cour)<br>[2] Supermarché/Épicerie<br>[3] Amis/famille<br>[4] Marché ouvert<br>[5] Vendeur de rue | [6] Agriculture vivrière (terre agricole)<br>[7] Boucher<br>[8] Autre, préciser _____<br>[99] Ne sait pas<br>[98] Pas de réponse |                       |



**l'habitation/de la/les structure(s) individuelle(s) d'habitation(s), les vêtements/les outils de cuisine) ?**

*Instruction* : Indiquer un code par catégorie uniquement.

| Boisson                                                                                                                                                                                                                                                                                                                                                                                                                                                                                                                                                                                                                                                                                                                                                                                                                                                                                                    | Cuisine    | Bain       | Nettoyage  |
|------------------------------------------------------------------------------------------------------------------------------------------------------------------------------------------------------------------------------------------------------------------------------------------------------------------------------------------------------------------------------------------------------------------------------------------------------------------------------------------------------------------------------------------------------------------------------------------------------------------------------------------------------------------------------------------------------------------------------------------------------------------------------------------------------------------------------------------------------------------------------------------------------------|------------|------------|------------|
| Code _____                                                                                                                                                                                                                                                                                                                                                                                                                                                                                                                                                                                                                                                                                                                                                                                                                                                                                                 | Code _____ | Code _____ | Code _____ |
| [1] Eau du robinet (à l'intérieur de l'habitation ; privée)<br>[2] Eau du robinet (à l'extérieur de l'habitation : cour/arrière-cour ; privée)<br>[3] Eau du robinet (à l'extérieur de l'habitation ; publique/partagée)<br>[4] Borne-fontaine/eau courante (à l'intérieur de l'habitation ; privée)<br>[5] Borne-fontaine/eau courante (à l'extérieur de l'habitation : cour/arrière-cour ; privée)<br>[6] Borne-fontaine/eau courante (à l'extérieur de l'habitation ; publique/partagée)<br>[7] Camion-citerne (public ; partagé)<br>[8] Eaux de surface (canal, canal d'irrigation)<br>[9] Eaux de surface (lac, étang, rivière, ruisseau)<br>[10] Eau de source<br>[11] Eau de pluie<br>[12] Puits/Puits de forage (en plein air/non couvert/non protégé)<br>[13] Puits/Puits de forage (couvert/protégé)<br>[14] Eau en bouteille<br>[15] Autre, préciser _____ [99] Ne sait pas [98] Pas de réponse |            |            |            |

**21 Les membres de ce ménage traitent-ils habituellement l'eau pour la boisson, la cuisine/la préparation des aliments/des repas, le bain, et le nettoyage (de l'habitation/des/de la structure(s) individuelle(s) d'habitation(s), des vêtements/des outils de cuisine) avant la consommation ? Comment l'eau est-elle habituellement traitée ?**

*Instruction*: Indiquer tous les codes nécessaires par catégorie ; plus d'une réponse par catégorie est possible.

| Boisson                                                                                                                                                                                                                                                                                                                                                                                                                                                                                | Cuisine    | Bain       | Nettoyage  |
|----------------------------------------------------------------------------------------------------------------------------------------------------------------------------------------------------------------------------------------------------------------------------------------------------------------------------------------------------------------------------------------------------------------------------------------------------------------------------------------|------------|------------|------------|
| Code _____                                                                                                                                                                                                                                                                                                                                                                                                                                                                             | Code _____ | Code _____ | Code _____ |
| [1] Non, pas du tout<br>[2] Non, seulement pour les malades du ménage<br>[3] Non, seulement selon la saison (saison sèche)<br>[4] Oui, par filtration (tissu, céramique, sable)<br>[5] Oui, par sédimentation<br>[6] Autre, préciser _____<br>[7] Non, seulement pour les enfants du ménage<br>[8] Non, seulement selon la saison (saison humide)<br>[9] Oui, par ébullition<br>[10] Oui, par désinfection solaire<br>[11] Oui, par chloration<br>[99] Ne sait pas [98] Pas de réponse |            |            |            |

**22 Quel(s) membre(s) de ce ménage recueille(nt) habituellement l'eau potable comme indiqué à la question 20 pour les autres membres de ce ménage ?**

*Instructions* : Se référer à la question 9 du « Formulaire 3 Partie A – Données démographiques/Informations générales sur le ménage » et indiquer/identifiant les initiales du membre.

- Membre du ménage, indiquer les initiales/identifiant(s) \_\_\_\_\_  
 99=Ne sait pas  98=Pas de réponse

**23 Comment les membres de ce ménage conservent-ils habituellement l'eau potable indiquée à la question 20?**

- |                                                                                          |                                                                                                                                   |
|------------------------------------------------------------------------------------------|-----------------------------------------------------------------------------------------------------------------------------------|
| <input type="radio"/> 1=Réservoir d'eau (non couvert)                                    | <input type="radio"/> 10=Bol (couvert par chiffon/tissu, couvercle, feuilles)                                                     |
| <input type="radio"/> 2=Réservoir d'eau (couvert par chiffon/tissu, couvercle, feuilles) | <input type="radio"/> 11=Pot en bois (non couvert)                                                                                |
| <input type="radio"/> 3=Récipient (non couvert)                                          | <input type="radio"/> 12= Pot en bois (couvert par chiffon/ tissu, couvercle, feuilles)                                           |
| <input type="radio"/> 4=Récipient (couvert par chiffon/tissu, couvercle, feuilles)       | <input type="radio"/> 13= Récipient en peau (chèvre, mouton, bovins, non couvert)                                                 |
| <input type="radio"/> 5=Pot en terre (non couvert)                                       | <input type="radio"/> 14=Récipient en peau (chèvre, mouton, bovins ; couvert par un chiffon/du tissu, un couvercle, des feuilles) |
| <input type="radio"/> 6=Pot en terre (couvert par chiffon/tissu, couvercle, feuilles)    | <input type="radio"/> 15=NON CONSERVÉE                                                                                            |
| <input type="radio"/> 7=Seau (non couvert)                                               | <input type="radio"/> 16=Autre, préciser _____                                                                                    |

- 8=Seau (couvert par chiffon/tissu, couvercle, feuilles)       99=Ne sait pas  
 9=Bol (non couvert)       98= Pas de réponse

**24 Si les membres de ce ménage utilisent une source d'approvisionnement en eau potable partagée comme indiqué à la question 20, par combien de personnes cette eau potable est-elle partagée ?**

- 1=<10 personnes       3=25-49 personnes       5=NON PARTAGÉE       99=Ne sait pas  
 2=11-24 personnes       4=>50 personnes       98=Pas de réponse

**TRAITEMENT DES DÉCHETS**

**25 Où les membres de ce ménage jettent-ils habituellement les eaux usées de, par exemple, la cuisine/la préparation des aliments/repas, le bain et/ou le ménage, et jettent-ils habituellement les déchets domestiques, les déchets humains/déjections ?**

*Instruction:* Indiquer un code par catégorie uniquement.

| Eaux usées de par exemple cuisine/préparation des aliments/repas, bain et/ou ménage                                                                                                                                                                                                                                                                                                                                                                                                                                                                                                                                                                                                                                                                                                                                                                                                                                                                                                                                                                                             | Déchets domestiques | Déchets humains/déjections |
|---------------------------------------------------------------------------------------------------------------------------------------------------------------------------------------------------------------------------------------------------------------------------------------------------------------------------------------------------------------------------------------------------------------------------------------------------------------------------------------------------------------------------------------------------------------------------------------------------------------------------------------------------------------------------------------------------------------------------------------------------------------------------------------------------------------------------------------------------------------------------------------------------------------------------------------------------------------------------------------------------------------------------------------------------------------------------------|---------------------|----------------------------|
| Code _____                                                                                                                                                                                                                                                                                                                                                                                                                                                                                                                                                                                                                                                                                                                                                                                                                                                                                                                                                                                                                                                                      | Code _____          | Code _____                 |
| [1] Sur le sol/surface libre proche de l'habitation (cour/arrière-cour, privé)<br>[2] Sur le sol/surface libre loin de l'habitation dans la communauté (partagé, public)<br>[3] Dans un trou proche de la maison (cour/arrière-cour, privé)<br>[4] Dans un trou loin de la maison dans la communauté (partagé, public)<br>[5] Versement dans des eaux de surface dans la communauté (lac, étang, rivière, ruisseau, public, partagé)<br>[6] Versement dans des eaux de surface dans la communauté (canal, canal d'irrigation, public, partagé)<br>[7] Versement dans de l'eau de source dans la communauté (public, partagé)<br>[8] Versement dans une fosse septique proche de l'habitation (cour/arrière-cour, proche de toilettes si disponibles, privé)<br>[9] Versement dans une fosse septique dans la communauté (partagé, public)<br>[10] Versement dans les égouts proches de la maison (cour/arrière-cour, privé)<br>[11] Versement dans les égouts dans la communauté (partagé, public)<br>[12] Autre, préciser _____      [99] Ne sait pas      [98] Pas de réponse |                     |                            |

**26 Les membres de ce ménage traitent-ils habituellement les déchets domestiques de la maison au préalable avant de les jeter ?**

- 1=Oui, incinération des déchets       3=NON  
 2=Oui, séparation/tri des déchets dégradables et non dégradables       4=Oui, Autre, préciser \_\_\_\_\_  
 99=Ne sait pas       98=Pas de réponse

**27 À quelle distance de la source d'approvisionnement en eau de ce ménage comme indiqué à la question 20 se trouve l'emplacement de l'élimination des eaux usées, des déchets domestiques et humains/excréments de ce ménage comme indiqué à la question 25 ?**

*Instructions :* Indiquer un code par catégorie uniquement. Indiquer la distance en mètres [m].

| Eaux usées de, par exemple, cuisine/préparation des aliments/repas, bain et/ou ménage                                                                                                  | Déchets domestiques | Déchets humains/déjections |
|----------------------------------------------------------------------------------------------------------------------------------------------------------------------------------------|---------------------|----------------------------|
| Code _____                                                                                                                                                                             | Code _____          | Code _____                 |
| [1] <5 m      [3] ≥25 à <50 m      [5] ≥100 à <500 m      [7] ≥1,000 m<br>[2] ≥5 à <25 m      [4] ≥50 à <100 m      [6] ≥500 à <1,000 m      [99] Ne sait pas      [98] Pas de réponse |                     |                            |

**28 À quelle distance de la source d'approvisionnement en eau principale de ce ménage pour la cuisine/la préparation des aliments/des repas comme indiqué à la question 20 se trouve l'emplacement de l'élimination des eaux usées, des déchets domestiques et humains/excréments de ce ménage comme indiqué à la question 25 ?**

*Instructions :* Indiquer un code par catégorie uniquement. Indiquer la distance en mètres [m].

| Eaux usées de par exemple cuisine/préparation des aliments/repas, bain et/ou ménage | Déchets domestiques | Déchets humains/excréments |
|-------------------------------------------------------------------------------------|---------------------|----------------------------|
| Code _____                                                                          | Code _____          | Code _____                 |



|                |                  |                                      |
|----------------|------------------|--------------------------------------|
| Code _____     | Code _____       | Code _____                           |
| [1] <5 m       | [3] ≥25 à <50 m  | [5] ≥100 à <500 m                    |
| [2] ≥5 à <25 m | [4] ≥50 à <100 m | [6] ≥500 à <1,000 m                  |
|                |                  | [7] ≥1,000 m                         |
|                |                  | [99] Ne sait pas [98] Pas de réponse |

### ANIMAUX DE FERME/DOMESTIQUES

#### 29 Quel genre d'animaux/de bétail et d'animaux domestiques/de compagnie les membres de ce ménage possèdent-ils ?

*Instruction* : Cocher plusieurs cases par catégorie si nécessaire ; il peut y avoir plus d'une réponse par catégorie.

| Animaux de ferme/bétail                                                                     |                                                           | Animaux domestiques/de compagnie                               |
|---------------------------------------------------------------------------------------------|-----------------------------------------------------------|----------------------------------------------------------------|
| <input type="radio"/> 1=Bovin                                                               | <input type="radio"/> 9=Chameau                           | <input type="radio"/> 1=Chien                                  |
| <input type="radio"/> 2=Mouton                                                              | <input type="radio"/> 10=Rongeurs (lapin), préciser _____ | <input type="radio"/> 2=Rongeurs (lapin), préciser _____       |
| <input type="radio"/> 3=Âne                                                                 | <input type="radio"/> 11=Chèvre                           | <input type="radio"/> 3=Chat                                   |
| <input type="radio"/> 4= Volaille (i.e. poulet, canard, pigeon, oie, dinde), préciser _____ | <input type="radio"/> 12=Cheval                           | <input type="radio"/> 4=PAS D'ANIMAUX DOMESTIQUES/DE COMPAGNIE |
| <input type="radio"/> 5=Zébu                                                                | <input type="radio"/> 13=PAS D'ANIMAUX DE FERME/DE BÉTAIL | <input type="radio"/> 5=Autre, préciser _____                  |
| <input type="radio"/> 6=Cochon                                                              | <input type="radio"/> 14=Autre, préciser _____            | <input type="radio"/> 99=Ne sait pas                           |
| <input type="radio"/> 7=Poisson                                                             | <input type="radio"/> 99=Ne sait pas                      | <input type="radio"/> 98=Pas de réponse                        |
| <input type="radio"/> 8=Buffle                                                              | <input type="radio"/> 98=Pas de réponse                   |                                                                |

#### 30 Où les membres de ce ménage gardent-ils habituellement les animaux de ferme/le bétail et les animaux domestiques/de compagnie de ce ménage comme indiqué à la question 29 ?

*Instruction* : Indiquer un code par catégorie uniquement.

| Animaux de ferme/bétail                                                                                                              | Animaux domestiques/de compagnie                                                                 |
|--------------------------------------------------------------------------------------------------------------------------------------|--------------------------------------------------------------------------------------------------|
| <input type="radio"/> 1=Étable/Cage/Bassin d'eau sur la propriété de l'habitation (arrière-cour/cour)                                | <input type="radio"/> 1=Cage/Chaîne proche de l'habitation (arrière-cour/cour)                   |
| <input type="radio"/> 2=Étable/Cage/Bassin d'eau à l'extérieur de l'habitation dans la communauté                                    | <input type="radio"/> 2= Cage/Chaîne à l'extérieur de l'habitation dans la communauté            |
| <input type="radio"/> 3=Étable/Cage/Bassin d'eau à l'extérieur de la communauté                                                      | <input type="radio"/> 3= Cage/Chaîne à l'extérieur de la communauté (public)                     |
| <input type="radio"/> 4=Surface libre/Eaux de surface/Eau de source sur la propriété de l'habitation (habitation, arrière-cour/cour) | <input type="radio"/> 4=Surface libre proche de l'habitation (dans la maison, arrière-cour/cour) |
| <input type="radio"/> 5=Surface libre/Eaux de surface/Eau de source à l'extérieur de l'habitation dans la communauté                 | <input type="radio"/> 5=Surface libre à l'extérieur de l'habitation dans la communauté           |
| <input type="radio"/> 6=Surface libre/Eaux de surface/Eau de source à l'extérieur de la communauté                                   | <input type="radio"/> 6=Surface libre à l'extérieur de la communauté                             |
| <input type="radio"/> 7=Pas applicable (nulle part /pas d'animaux de ferme/bétail)                                                   | <input type="radio"/> 7=Pas applicable (nulle part/pas d'animaux domestiques/de compagnie)       |
| <input type="radio"/> 8=Autre, préciser _____                                                                                        | <input type="radio"/> 8=Autre, préciser _____                                                    |
| <input type="radio"/> 99=Ne sait pas                                                                                                 | <input type="radio"/> 99=Ne sait pas                                                             |
| <input type="radio"/> 98=Pas de réponse                                                                                              | <input type="radio"/> 98=Pas de réponse                                                          |

#### 31 Quelle est l'importance de l'élevage que les membres de ce ménage pratiquent ?

- |                                                                               |                                               |
|-------------------------------------------------------------------------------|-----------------------------------------------|
| <input type="radio"/> 1=Pour leurs propres besoins («élevage d'arrière-cour») | <input type="radio"/> 4=Autre, préciser _____ |
| <input type="radio"/> 2=Pas applicable (pas d'élevage)                        | <input type="radio"/> 99=Ne sait pas          |
| <input type="radio"/> 3=3=Demande massive/industrielle («élevage intensif»)   | <input type="radio"/> 98=Pas de réponse       |

**32 Quel approvisionnement en eau les membres de ce ménage utilisent-ils pour fournir de l'eau aux animaux de ferme/au bétail et aux animaux domestiques/de compagnie de ce ménage comme indiqué à la question 29 ?**

*Instruction* : Indiquer un code par catégorie uniquement.

| Animaux de ferme/bétail                                                                      | Animaux domestiques/de compagnie     |
|----------------------------------------------------------------------------------------------|--------------------------------------|
| Code _____                                                                                   | Code _____                           |
| [1] Eau du robinet (à l'intérieur de l'habitation ; privée)                                  |                                      |
| [2] Eau du robinet (à l'extérieur de l'habitation : cour/arrière-cour ; privée)              |                                      |
| [3] Eau du robinet (à l'extérieur de l'habitation ; publique/partagée)                       |                                      |
| [4] Borne-fontaine/eau courante (à l'intérieur de l'habitation ; privée)                     |                                      |
| [5] Borne-fontaine/eau courante (à l'extérieur de l'habitation : cour/arrière-cour ; privée) |                                      |
| [6] Borne-fontaine/eau courante (à l'extérieur de l'habitation ; publique/partagée)          |                                      |
| [7] Camion-citerne (public ; partagé)                                                        |                                      |
| [8] Eaux de surface (canal, canal d'irrigation)                                              |                                      |
| [9] Eaux de surface (lac, étang, rivière, ruisseau)                                          |                                      |
| [10] Eau de source                                                                           |                                      |
| [11] Eau de pluie                                                                            |                                      |
| [12] Puits/Puits de forage (en plein air/non couvert/non protégé)                            |                                      |
| [13] Puits/Puits de forage (couvert/protégé)                                                 |                                      |
| [14] Pas applicable (pas d'animaux de ferme/bétail; pas d'animaux domestiques/de compagnie)  |                                      |
| [15] Autre, préciser _____                                                                   | [99] Ne sait pas [98] Pas de réponse |

**33 Les membres de ce ménage se lavent-ils habituellement les mains après avoir nourri, donné de l'eau et nettoyé l'étable/la cage/le bassin d'eau des animaux de ferme/du bétail de ce ménage comme indiqué à la question 29 ?**

*Instruction* : Indiquer un code par catégorie uniquement.

| Animaux de ferme/bétail                                          | Animaux domestiques/de compagnie                                                            |
|------------------------------------------------------------------|---------------------------------------------------------------------------------------------|
| Code _____                                                       | Code _____                                                                                  |
| [1] Lavent les mains avec du savon et de l'eau                   | [7] Ne lavent pas, rien pour laver les mains                                                |
| [2] Lavent les mains avec de l'eau uniquement                    | [8] Autre, préciser _____                                                                   |
| [3] Frottent les mains avec des feuilles/de la paille/de l'herbe | [9] Pas applicable (pas d'animaux de ferme/bétail ; pas d'animaux domestiques/de compagnie) |
| [4] Frottent les mains avec du sable                             |                                                                                             |
| [5] Frottent les mains avec un chiffon/du tissu                  |                                                                                             |
| [6] Ne lavent pas, pas besoin/pas sale                           | [99] Ne sait pas [98] Pas de réponse                                                        |

**CULTURES AGRICOLES**

**34 Quel genre de cultures les membres de ce ménage font-ils pousser/cultivent-ils ?**

*Instruction* : Cocher plusieurs cases si nécessaire ; il peut y avoir plus d'une réponse.

- |                                                                      |                                                |
|----------------------------------------------------------------------|------------------------------------------------|
| <input type="radio"/> 1=Café                                         | <input type="radio"/> 10=Tabac                 |
| <input type="radio"/> 2=Riz                                          | <input type="radio"/> 11=Canne à Sucre         |
| <input type="radio"/> 3=Fruits (cultivés sur arbustes/arbre)         | <input type="radio"/> 12=Chad/Chat             |
| <input type="radio"/> 4=Fruits (cultivés au sol)                     | <input type="radio"/> 13=Bees/Honey            |
| <input type="radio"/> 5=Légumes/salade (cultivés sur arbustes/arbre) | <input type="radio"/> 14=Coton                 |
| <input type="radio"/> 6=Légumes/salade (cultivés au sol)             | <input type="radio"/> 15=PAS DE CULTURES       |
| <input type="radio"/> 7=Céréales (blé, orge, avoine, maïs)           | <input type="radio"/> 16=Autre, préciser _____ |
| <input type="radio"/> 8=Thé                                          | <input type="radio"/> 99=Ne sait pas           |
| <input type="radio"/> 9=Noix de cajou                                | <input type="radio"/> 98=Pas de réponse        |

**35 Où les champs/terres agricoles des membres de ce ménage se situent-ils/elles?**

- |                                                                             |                                                                          |
|-----------------------------------------------------------------------------|--------------------------------------------------------------------------|
| <input type="radio"/> 1=On the property of the house (i.e. back-/courtyard) | <input type="radio"/> 4=Outside the house in the community               |
| <input type="radio"/> 2=Outside the community                               | <input type="radio"/> 5=Not applicable (no crop farming)                 |
| <input type="radio"/> 3=Other, specify _____                                | <input type="radio"/> 99=Don't know <input type="radio"/> 98=No response |

**36 Quelle est l'importance des cultures des membres de ce ménage?**

- 1=Leurs propres besoins (« agriculture d'arrière-cour »)       4=Autre, préciser \_\_\_\_\_  
 2=Pas applicable (pas de cultures)       99=Ne sait pas  
 3=Demande massive/industrielle (agriculture intensive)       98= Pas de réponse

**37 Les membres de ce ménage utilisent-ils habituellement des herbicides, pesticides et engrais pour les cultures indiquées à la question 34?**

*Instruction* : Indiquer un code par catégorie uniquement.

| Herbicides                                               | Pesticides                                               | Engrais                                                  |
|----------------------------------------------------------|----------------------------------------------------------|----------------------------------------------------------|
| <input type="radio"/> 1=Oui, préciser l'herbicide        | <input type="radio"/> 1=Oui, préciser le pesticide       | <input type="radio"/> 1=Oui, préciser l'engrais          |
| <input type="radio"/> 2=Pas applicable (pas de cultures) | <input type="radio"/> 2=Pas applicable (pas de cultures) | <input type="radio"/> 2=Pas applicable (pas de cultures) |
| <input type="radio"/> 3=Pas d'utilisation des herbicides | <input type="radio"/> 3=Pas d'utilisation des pesticides | <input type="radio"/> 3=Pas d'utilisation des engrais    |
| <input type="radio"/> 99=Ne sait pas                     | <input type="radio"/> 99=Ne sait pas                     | <input type="radio"/> 99=Ne sait pas                     |
| <input type="radio"/> 98=Pas de réponse                  | <input type="radio"/> 98=Pas de réponse                  | <input type="radio"/> 98=Pas de réponse                  |

**38 Les membres de ce ménage se lavent-ils les mains après avoir travaillé dans les terres agricoles pour les cultures indiquées à la question 34 ?**

- 1=Oui, se lavent les mains avec du savon et de l'eau       6=Oui, se frottent les mains avec du sable  
 2=Oui, se frottent les mains avec des feuilles/de la paille/de l'herbe       7=Non, ne se lavent pas les mains  
 3=Oui, se frottent les mains avec des chiffons/du tissu       8=Autre, préciser \_\_\_\_\_  
 4=Pas applicable (pas de cultures)       99=Ne sait pas  
 5=Oui, se lavent les mains avec de l'eau uniquement       98= Pas de réponse

Site \_\_\_\_ Sous-zone \_\_\_\_ Numéro d'habitation \_\_\_\_ Identifiant de l'enquêteur \_\_\_\_

**FORMULAIRE 4: ÉVALUATION DE L'UTILISATION GÉNÉRIQUE DES SOINS DE SANTÉ  
GLOBAUX, STRATIFIÉE SELON L'ÂGE ET LE SEXE  
Partie A –Évaluation de l'utilisation *générique* des soins de santé**

**Instructions pour l'enquêteur**

- Compléter ce formulaire uniquement si la personne interrogée a consenti à participer (voir « Formulaire 2 — FORMULAIRE DE CONSENTEMENT ») ; la personne interrogée ainsi que définie pour cette enquête est un adulte (selon l'âge légal de majorité du pays), un membre du ménage et un décideur en ce qui concerne les soins de santé quotidiens et l'utilisation de soins de santé pour le ménage entier et ses membres ; il ne doit pas être, par exemple, un voisin ou un visiteur.
- Se référer à « Formulaire 3 — Partie A — Informations générales sur le ménage » comme référence pour obtenir le nombre total de membres du ménage ainsi que l'âge et le sexe de chaque membre du ménage.
- Recueillir les données de tous les membres du ménage que tous les membre du ménage soient présents ou non au moment de l'entretien ; ne recueillir et n'inscrire les données que des personnes présentes au moment de l'entretien fausserait les données.
- Un ménage est défini/les membres d'un ménage sont définis comme une personne ou un groupe de personnes avec ou sans lien de parenté qui vivent ensemble dans la même unité d'habitation, qui reconnaissent un adulte de sexe masculin ou féminin comme chef de ménage, qui partagent les mêmes installations domestiques, qui sont considérés comme constituant une unité, et qui subviennent à leurs besoins en termes de nourriture et des autres éléments essentiels pour vivre.
- « Site » et « sous-zone » doivent être un numéro à trois chiffres, « numéro d'habitation » un numéro à quatre chiffres, et « identifiant de l'enquêteur » un numéro à deux chiffres (utiliser les listes préparées individuellement pour chaque site pour obtenir les codes) ; saisir « date » au format JJ/MM/AAAA et « heure » au format HH:MM et entourer MATIN ou APRÈS-MIDI. «Étiquette de l'étude» doit être une combinaison d'un code «site» à trois chiffres, d'un code «sous-zone» à trois chiffres et d'un code «numéro d'habitation» à quatre chiffres; le « identifiant de l'enquêteur » doit être un numéro à trois chiffres.
- Abréviation : EDS = Établissement de santé public/privé primaire/secondaire/tertiaire.

**MEMBRES DU MÉNAGE**

**1 Indiquer le nombre total de membres du ménage de cette habitation (au jour de la visite).**

*Instructions :* Le nombre total de membres du ménage doit être indiqué à l'aide d'un numéro à 2 chiffres ; voir également « Formulaire 3 — Partie A — INFORMATIONS GÉNÉRALES SUR LE MÉNAGE ».

Nombre total de membres du ménage : \_\_\_\_

**2 Indiquer le nombre de membres FÉMININS du ménage pour chacun des groupes d'âge suivants :**

*Instructions :* Le nombre total de membres féminins du ménage par groupe d'âge doit être indiqué à l'aide d'un numéro à 2 chiffres ; voir également « Formulaire 3 — Partie A — INFORMATIONS GÉNÉRALES SUR LE MÉNAGE ».

<2 ans : \_\_\_\_ ≥2 à <5 ans : \_\_\_\_ ≥5 à <15 ans : \_\_\_\_ ≥15 ans : \_\_\_\_

**3 Indiquer le nombre de membres MASCULINS du ménage pour chacun des groupes d'âge suivants :**

*Instructions :* Le nombre total de membres masculins du ménage par groupe d'âge doit être indiqué à l'aide d'un numéro à 2 chiffres ; voir également « Formulaire 3 — Partie A — INFORMATIONS GÉNÉRALES SUR LE MÉNAGE ».

<2 ans : \_\_\_\_ ≥2 à <5 ans : \_\_\_\_ ≥5 à <15 ans : \_\_\_\_ ≥15 ans : \_\_\_\_

**COMPORTEMENT DE RECHERCHE DE SOINS DE SANTÉ**

**4 Indiquer où les membres féminins/masculins du foyer d'âges <2 ans/≥2 à <5 ans/≥5 à <15 ans/≥15 ans recherchent habituellement des soins de santé pour les signes/symptômes suivants. Merci d'attribuer une note entre 1 et 4.**

*Instructions :*

- Compléter la question 4 séparément pour les membres du ménage féminins et masculins d'âge <2 ans, ≥2 à <5 ans, ≥5 à <15 ans et ≥15 ans et entoure le sexe et le groupe d'âge pour lequel Q4 a été complétée; passer la question 4 s'il n'y a aucun membre féminin/masculin du ménage d'âge <2 ans/ ≥2 à <5 ans/ ≥5 à <15 ans/ ≥15 ans.
- Indiquer une réponse pour chaque choix de soins de santé pour chaque signe/symptôme; attribuer une note de 1 à 4 (1=1<sup>er</sup> choix; 2=2<sup>ème</sup> choix; 3=3<sup>ème</sup> choix; 4=non choisi); indiquer un code s'il y a lieu en utilisant les listes préparées (utiliser listes préparées individuellement pour chaque site pour obtenir les codes); cocher «Ne sait pas» s'il y a lieu.

| Signe/Symptôme                                                  | Choix de soins de santé  |      |                          |      |                          |           |                          |                            |                          |                       |
|-----------------------------------------------------------------|--------------------------|------|--------------------------|------|--------------------------|-----------|--------------------------|----------------------------|--------------------------|-----------------------|
|                                                                 | EDS SETA                 |      | Autre EDS                |      | Médecin                  | Pharmacie | Guérisseur traditionnel  | Nulle part Auto-médication | Nulle part Rien          | Ne sait pas           |
|                                                                 | Note                     | Code | Note                     | Code | Note                     | Note      | Note                     | Note                       | Note                     | Cocher                |
| <b>1 [A] Fièvre</b>                                             | O=1<br>O=2<br>O=3<br>O=4 |      | O=1<br>O=2<br>O=3<br>O=4 |      | O=1<br>O=2<br>O=3<br>O=4 |           | O=1<br>O=2<br>O=3<br>O=4 |                            | O=1<br>O=2<br>O=3<br>O=4 | <input type="radio"/> |
| <b>2 Fièvre &lt;3 jours (continus)</b>                          | O=1<br>O=2<br>O=3<br>O=4 |      | O=1<br>O=2<br>O=3<br>O=4 |      | O=1<br>O=2<br>O=3<br>O=4 |           | O=1<br>O=2<br>O=3<br>O=4 |                            | O=1<br>O=2<br>O=3<br>O=4 | <input type="radio"/> |
| <b>3 Fièvre ≥3 jours (continus)</b>                             | O=1<br>O=2<br>O=3<br>O=4 |      | O=1<br>O=2<br>O=3<br>O=4 |      | O=1<br>O=2<br>O=3<br>O=4 |           | O=1<br>O=2<br>O=3<br>O=4 |                            | O=1<br>O=2<br>O=3<br>O=4 | <input type="radio"/> |
| <b>4 Frissons<br/>Tremblements</b>                              | O=1<br>O=2<br>O=3<br>O=4 |      | O=1<br>O=2<br>O=3<br>O=4 |      | O=1<br>O=2<br>O=3<br>O=4 |           | O=1<br>O=2<br>O=3<br>O=4 |                            | O=1<br>O=2<br>O=3<br>O=4 | <input type="radio"/> |
| <b>5 Convulsion</b>                                             | O=1<br>O=2<br>O=3<br>O=4 |      | O=1<br>O=2<br>O=3<br>O=4 |      | O=1<br>O=2<br>O=3<br>O=4 |           | O=1<br>O=2<br>O=3<br>O=4 |                            | O=1<br>O=2<br>O=3<br>O=4 | <input type="radio"/> |
| <b>6 Perte de poids</b>                                         | O=1<br>O=2<br>O=3<br>O=4 |      | O=1<br>O=2<br>O=3<br>O=4 |      | O=1<br>O=2<br>O=3<br>O=4 |           | O=1<br>O=2<br>O=3<br>O=4 |                            | O=1<br>O=2<br>O=3<br>O=4 | <input type="radio"/> |
| <b>7 Déshydratation</b>                                         | O=1<br>O=2<br>O=3<br>O=4 |      | O=1<br>O=2<br>O=3<br>O=4 |      | O=1<br>O=2<br>O=3<br>O=4 |           | O=1<br>O=2<br>O=3<br>O=4 |                            | O=1<br>O=2<br>O=3<br>O=4 | <input type="radio"/> |
| <b>8 Malaise<br/>Faiblesse/ Fatigue</b>                         | O=1<br>O=2<br>O=3<br>O=4 |      | O=1<br>O=2<br>O=3<br>O=4 |      | O=1<br>O=2<br>O=3<br>O=4 |           | O=1<br>O=2<br>O=3<br>O=4 |                            | O=1<br>O=2<br>O=3<br>O=4 | <input type="radio"/> |
| <b>9 Douleurs<br/>(muscles/articulations /os)</b>               | O=1<br>O=2<br>O=3<br>O=4 |      | O=1<br>O=2<br>O=3<br>O=4 |      | O=1<br>O=2<br>O=3<br>O=4 |           | O=1<br>O=2<br>O=3<br>O=4 |                            | O=1<br>O=2<br>O=3<br>O=4 | <input type="radio"/> |
| <b>10 Maux de tête</b>                                          | O=1<br>O=2<br>O=3<br>O=4 |      | O=1<br>O=2<br>O=3<br>O=4 |      | O=1<br>O=2<br>O=3<br>O=4 |           | O=1<br>O=2<br>O=3<br>O=4 |                            | O=1<br>O=2<br>O=3<br>O=4 | <input type="radio"/> |
| <b>11 Vertiges/<br/>Confusion<br/>Perte de<br/>connaissance</b> | O=1<br>O=2<br>O=3<br>O=4 |      | O=1<br>O=2<br>O=3<br>O=4 |      | O=1<br>O=2<br>O=3<br>O=4 |           | O=1<br>O=2<br>O=3<br>O=4 |                            | O=1<br>O=2<br>O=3<br>O=4 | <input type="radio"/> |
| <b>12 Troubles de la<br/>pression artérielle</b>                | O=1<br>O=2<br>O=3<br>O=4 |      | O=1<br>O=2<br>O=3<br>O=4 |      | O=1<br>O=2<br>O=3<br>O=4 |           | O=1<br>O=2<br>O=3<br>O=4 |                            | O=1<br>O=2<br>O=3<br>O=4 | <input type="radio"/> |
| <b>13 Troubles<br/>cardiaques</b>                               | O=1<br>O=2<br>O=3<br>O=4 |      | O=1<br>O=2<br>O=3<br>O=4 |      | O=1<br>O=2<br>O=3<br>O=4 |           | O=1<br>O=2<br>O=3<br>O=4 |                            | O=1<br>O=2<br>O=3<br>O=4 | <input type="radio"/> |

| Signe/Symptôme                                                                                  | Choix de soins de santé |      |           |      |         |           |                         |                            |                 |             |
|-------------------------------------------------------------------------------------------------|-------------------------|------|-----------|------|---------|-----------|-------------------------|----------------------------|-----------------|-------------|
|                                                                                                 | EDS SETA                |      | Autre EDS |      | Médecin | Pharmacie | Guérisseur traditionnel | Nulle part Auto-médication | Nulle part Rien | Ne sait pas |
|                                                                                                 | Note                    | Code | Note      | Code | Note    | Note      | Note                    | Note                       | Note            | Cocher      |
| <b>14</b> Nausée<br>Vomissements                                                                | O=1                     |      | O=1       |      | O=1     | O=1       | O=1                     | O=1                        | O=1             | ○           |
|                                                                                                 | O=2                     |      | O=2       |      | O=2     | O=2       | O=2                     | O=2                        | O=2             |             |
|                                                                                                 | O=3                     |      | O=3       |      | O=3     | O=3       | O=3                     | O=3                        | O=3             |             |
|                                                                                                 | O=4                     |      | O=4       |      | O=4     | O=4       | O=4                     | O=4                        | O=4             |             |
| <b>15</b> Diarrhée<br>(liquide/sanglante/<br>mucopurulente)                                     | O=1                     |      | O=1       |      | O=1     | O=1       | O=1                     | O=1                        | O=1             | ○           |
|                                                                                                 | O=2                     |      | O=2       |      | O=2     | O=2       | O=2                     | O=2                        | O=2             |             |
|                                                                                                 | O=3                     |      | O=3       |      | O=3     | O=3       | O=3                     | O=3                        | O=3             |             |
|                                                                                                 | O=4                     |      | O=4       |      | O=4     | O=4       | O=4                     | O=4                        | O=4             |             |
| <b>16</b> Douleur<br>abdominale<br>Douleur intestinale                                          | O=1                     |      | O=1       |      | O=1     | O=1       | O=1                     | O=1                        | O=1             | ○           |
|                                                                                                 | O=2                     |      | O=2       |      | O=2     | O=2       | O=2                     | O=2                        | O=2             |             |
|                                                                                                 | O=3                     |      | O=3       |      | O=3     | O=3       | O=3                     | O=3                        | O=3             |             |
|                                                                                                 | O=4                     |      | O=4       |      | O=4     | O=4       | O=4                     | O=4                        | O=4             |             |
| <b>17</b> Perte de sang/<br>Hémorragie<br>(interne)                                             | O=1                     |      | O=1       |      | O=1     | O=1       | O=1                     | O=1                        | O=1             | ○           |
|                                                                                                 | O=2                     |      | O=2       |      | O=2     | O=2       | O=2                     | O=2                        | O=2             |             |
|                                                                                                 | O=3                     |      | O=3       |      | O=3     | O=3       | O=3                     | O=3                        | O=3             |             |
|                                                                                                 | O=4                     |      | O=4       |      | O=4     | O=4       | O=4                     | O=4                        | O=4             |             |
| <b>18</b> Perte de sang/<br>Hémorragie<br>(externe)                                             | O=1                     |      | O=1       |      | O=1     | O=1       | O=1                     | O=1                        | O=1             | ○           |
|                                                                                                 | O=2                     |      | O=2       |      | O=2     | O=2       | O=2                     | O=2                        | O=2             |             |
|                                                                                                 | O=3                     |      | O=3       |      | O=3     | O=3       | O=3                     | O=3                        | O=3             |             |
|                                                                                                 | O=4                     |      | O=4       |      | O=4     | O=4       | O=4                     | O=4                        | O=4             |             |
| <b>19</b> Éternuements<br>Nez qui coule                                                         | O=1                     |      | O=1       |      | O=1     | O=1       | O=1                     | O=1                        | O=1             | ○           |
|                                                                                                 | O=2                     |      | O=2       |      | O=2     | O=2       | O=2                     | O=2                        | O=2             |             |
|                                                                                                 | O=3                     |      | O=3       |      | O=3     | O=3       | O=3                     | O=3                        | O=3             |             |
|                                                                                                 | O=4                     |      | O=4       |      | O=4     | O=4       | O=4                     | O=4                        | O=4             |             |
| <b>20</b> Toux                                                                                  | O=1                     |      | O=1       |      | O=1     | O=1       | O=1                     | O=1                        | O=1             | ○           |
|                                                                                                 | O=2                     |      | O=2       |      | O=2     | O=2       | O=2                     | O=2                        | O=2             |             |
|                                                                                                 | O=3                     |      | O=3       |      | O=3     | O=3       | O=3                     | O=3                        | O=3             |             |
|                                                                                                 | O=4                     |      | O=4       |      | O=4     | O=4       | O=4                     | O=4                        | O=4             |             |
| <b>21</b> Respiration<br>rapide/<br>essoufflement                                               | O=1                     |      | O=1       |      | O=1     | O=1       | O=1                     | O=1                        | O=1             | ○           |
|                                                                                                 | O=2                     |      | O=2       |      | O=2     | O=2       | O=2                     | O=2                        | O=2             |             |
|                                                                                                 | O=3                     |      | O=3       |      | O=3     | O=3       | O=3                     | O=3                        | O=3             |             |
|                                                                                                 | O=4                     |      | O=4       |      | O=4     | O=4       | O=4                     | O=4                        | O=4             |             |
| <b>22</b> Difficultés<br>respiratoires<br>graves                                                | O=1                     |      | O=1       |      | O=1     | O=1       | O=1                     | O=1                        | O=1             | ○           |
|                                                                                                 | O=2                     |      | O=2       |      | O=2     | O=2       | O=2                     | O=2                        | O=2             |             |
|                                                                                                 | O=3                     |      | O=3       |      | O=3     | O=3       | O=3                     | O=3                        | O=3             |             |
|                                                                                                 | O=4                     |      | O=4       |      | O=4     | O=4       | O=4                     | O=4                        | O=4             |             |
| <b>23</b> Inflammation<br>de la peau<br>(éruptions cutanées/<br>rougeurs/pus/<br>démangeaisons) | O=1                     |      | O=1       |      | O=1     | O=1       | O=1                     | O=1                        | O=1             | ○           |
|                                                                                                 | O=2                     |      | O=2       |      | O=2     | O=2       | O=2                     | O=2                        | O=2             |             |
|                                                                                                 | O=3                     |      | O=3       |      | O=3     | O=3       | O=3                     | O=3                        | O=3             |             |
|                                                                                                 | O=4                     |      | O=4       |      | O=4     | O=4       | O=4                     | O=4                        | O=4             |             |
| <b>24</b> Gonflement/<br>Œdème                                                                  | O=1                     |      | O=1       |      | O=1     | O=1       | O=1                     | O=1                        | O=1             | ○           |
|                                                                                                 | O=2                     |      | O=2       |      | O=2     | O=2       | O=2                     | O=2                        | O=2             |             |
|                                                                                                 | O=3                     |      | O=3       |      | O=3     | O=3       | O=3                     | O=3                        | O=3             |             |
|                                                                                                 | O=4                     |      | O=4       |      | O=4     | O=4       | O=4                     | O=4                        | O=4             |             |
| <b>25</b> Jaunisse                                                                              | O=1                     |      | O=1       |      | O=1     | O=1       | O=1                     | O=1                        | O=1             | ○           |
|                                                                                                 | O=2                     |      | O=2       |      | O=2     | O=2       | O=2                     | O=2                        | O=2             |             |
|                                                                                                 | O=3                     |      | O=3       |      | O=3     | O=3       | O=3                     | O=3                        | O=3             |             |
|                                                                                                 | O=4                     |      | O=4       |      | O=4     | O=4       | O=4                     | O=4                        | O=4             |             |

Site \_\_\_\_ Sous-zone \_\_\_\_ Numéro d'habitation \_\_\_\_ Identifiant de l'enquêteur \_\_\_\_

## FORMULAIRE 4: ÉVALUATION DE L'UTILISATION GÉNÉRIQUE DES SOINS DE SANTÉ GLOBAUX, STRATIFIÉE SELON L'ÂGE ET LE SEXE

### Partie B – Facteurs associés aux soins de santé/Vaccination/Percéption de la maladie

#### DÉPLACEMENT À L'ÉTABLISSEMENT DE SANTÉ

- 1 Au cas où un établissement de santé (EDS) a été noté comme 1<sup>er</sup> choix de soins à la question 4A (fièvre), quel est habituellement le moyen de transport principal, le temps de trajet (selon le moyen de transport), le coût du trajet (selon le moyen de transport) et la distance du trajet (selon le moyen de transport) pour s'y rendre ?**

*Instructions* : Indiquer uniquement un code par catégorie, sexe ainsi que groupe d'âge. Passer cette question s'il n'y a pas de membre féminin/masculin d'âge <2 ans/≥2 à <5 ans/≥5 à <15 ans/≥15 ans dans ce ménage (voir également questions 2 et 3 de ce formulaire Partie A). Passer cette question si aucun EDS n'a été noté comme 1<sup>er</sup> choix de soins à la question 4A pour les membres masculins/féminins d'âge <2 ans/≥2 à <5 ans/≥5 à <15 ans/≥15 ans. Indiquer le temps de trajet en minute(s) [min]/ heure(s) [h], le coût total en USD, y compris les cadeaux éventuels, les aides financières et les dons, et la distance totale en mètre(s) [m]/kilomètre(s) [km].

| Membre féminin                                        |             |                      |           | Membre masculin          |             |                     |           |
|-------------------------------------------------------|-------------|----------------------|-----------|--------------------------|-------------|---------------------|-----------|
| <2 ans                                                | ≥2 à <5 ans | ≥5 à <15 ans         | ≥15 ans   | <2 ans                   | ≥2 à <5 ans | ≥5 à <15 ans        | ≥15 ans   |
| <b>1.1 Moyen de transport</b>                         |             |                      |           |                          |             |                     |           |
| Code ____                                             | Code ____   | Code ____            | Code ____ | Code ____                | Code ____   | Code ____           | Code ____ |
| [1] Private transportation (i.e. motorbike, car, bus) |             | [3] Walking          |           | [5] Other, specify _____ |             |                     |           |
| [2] Public transportation (i.e. motorbike, car, bus)  |             | [4] Bicycle          |           | [99] Don't know          |             | [98] No response    |           |
| <b>1.2 Temps de trajet</b>                            |             |                      |           |                          |             |                     |           |
| Code ____                                             | Code ____   | Code ____            | Code ____ | Code ____                | Code ____   | Code ____           | Code ____ |
| [1] <30 min                                           |             | [3] ≥1.0 à <2.0 h    |           | [5] ≥3.0 à <4.0 h        |             | [99] Ne sait pas    |           |
| [2] ≥30 à <60 min                                     |             | [4] ≥2.0 à <3.0 h    |           | [6] ≥4.0h                |             | [98] Pas de réponse |           |
| <b>1.3 Coût du transport</b>                          |             |                      |           |                          |             |                     |           |
| Code ____                                             | Code ____   | Code ____            | Code ____ | Code ____                | Code ____   | Code ____           | Code ____ |
| [1] <1.0 USD                                          |             | [3] ≥3.0 à <5.0 USD  |           | [5] ≥10.0 USD            |             | [99] Ne sait pas    |           |
| [2] ≥1.0 à <3.0 USD                                   |             | [4] ≥5.0 à <10.0 USD |           | [98] Pas de réponse      |             |                     |           |
| <b>1.4 Distance du trajet</b>                         |             |                      |           |                          |             |                     |           |
| Code ____                                             | Code ____   | Code ____            | Code ____ | Code ____                | Code ____   | Code ____           | Code ____ |
| [1] <500 m                                            |             | [3] ≥1.0 à <2.0 km   |           | [5] ≥3.0 à <4.0 km       |             | [99] Ne sait pas    |           |
| [2] ≥500 m à <1.0 km                                  |             | [4] ≥2.0 à <3.0 km   |           | [6] ≥4.0 km              |             | [98] Pas de réponse |           |

#### **ASSURANCE**

- 2 Pour quels membres de ce ménage l'assurance couvre-t-elle les dépenses de santé ?**

*Instructions* : Indiquer un code par catégorie. Passer cette question s'il n'y a aucun membre d'âge <2 ans/≥2 à <5 ans/≥5 à <15 ans/≥15 ans dans ce ménage (voir questions 2 et 3 de ce formulaire partie A).

| <2 ans     | ≥2 à <5 ans | ≥5 à <15 ans     | ≥15 ans             |
|------------|-------------|------------------|---------------------|
| Code _____ | Code _____  | Code _____       | Code _____          |
| [1] Oui    | [2] Non     | [99] Ne sait pas | [98] Pas de réponse |

- 3 Quels types de dépenses de santé sont habituellement couverts par l'assurance pour les membres de ce ménage ?**

*Instructions* : Indiquer uniquement un code par catégorie et par groupe d'âge. Passer cette question s'il n'y a aucun membre d'âge <2 ans/≥2 à <5 ans/≥5 à <15 ans/≥15 ans dans ce ménage (voir également les questions 2 et 3 de ce formulaire partie

A). Passer cette question s'il n'y a aucune assurance qui couvre les dépenses de santé des membres d'âge <2 ans/≥2 à <5 ans/≥5 à <15 ans/≥15 ans.

|                                                                                           | <2 ans     | ≥2 à <5 ans | ≥5 à <15 ans     | ≥15 ans             |
|-------------------------------------------------------------------------------------------|------------|-------------|------------------|---------------------|
|                                                                                           | [1] Oui    | [2] Non     | [99] Ne sait pas | [98] Pas de réponse |
| <b>1</b> Inscription                                                                      | Code _____ | Code _____  | Code _____       | Code _____          |
| <b>2</b> Consultation/Visite chez le médecin                                              | Code _____ | Code _____  | Code _____       | Code _____          |
| <b>3</b> Examen physique - général                                                        | Code _____ | Code _____  | Code _____       | Code _____          |
| <b>4</b> Examen physique – spécifique, préciser _____                                     | Code _____ | Code _____  | Code _____       | Code _____          |
| <b>5</b> Diagnostics - diagnostics généraux de laboratoire                                | Code _____ | Code _____  | Code _____       | Code _____          |
| <b>6</b> Diagnostics – diagnostics spécifiques de laboratoire, préciser _____             | Code _____ | Code _____  | Code _____       | Code _____          |
| <b>7</b> Diagnostics Imagerie générale                                                    | Code _____ | Code _____  | Code _____       | Code _____          |
| <b>8</b> Diagnostics Imagerie spécifique, préciser _____                                  | Code _____ | Code _____  | Code _____       | Code _____          |
| <b>9</b> Diagnostics Autre, préciser _____                                                | Code _____ | Code _____  | Code _____       | Code _____          |
| <b>10</b> Traitement Médication générale                                                  | Code _____ | Code _____  | Code _____       | Code _____          |
| <b>11</b> Traitement Médication spécifique, préciser _____                                | Code _____ | Code _____  | Code _____       | Code _____          |
| <b>12</b> Traitement Autre médication, préciser _____                                     | Code _____ | Code _____  | Code _____       | Code _____          |
| <b>13</b> Traitement Interventions (autres que chirurgie), préciser _____                 | Code _____ | Code _____  | Code _____       | Code _____          |
| <b>14</b> Traitement Chirurgie                                                            | Code _____ | Code _____  | Code _____       | Code _____          |
| <b>15</b> Hospitalisation <7 jours                                                        | Code _____ | Code _____  | Code _____       | Code _____          |
| <b>16</b> Hospitalisation ≥7 jours                                                        | Code _____ | Code _____  | Code _____       | Code _____          |
| <b>17</b> Services d'urgence                                                              | Code _____ | Code _____  | Code _____       | Code _____          |
| <b>18</b> Soins prénatals                                                                 | Code _____ | Code _____  | Code _____       | Code _____          |
| <b>19</b> Soins postnatals                                                                | Code _____ | Code _____  | Code _____       | Code _____          |
| <b>20</b> Médecine préventive                                                             | Code _____ | Code _____  | Code _____       | Code _____          |
| <b>21</b> Vaccination                                                                     | Code _____ | Code _____  | Code _____       | Code _____          |
| <b>22</b> Soins à domicile (personnes âgées, handicapés, malades chroniques/à long terme) | Code _____ | Code _____  | Code _____       | Code _____          |
| <b>23</b> Thérapie de soutien (physiothérapie, ergothérapie, réhabilitation)              | Code _____ | Code _____  | Code _____       | Code _____          |



**ETHNOGRAPHIE****4 À quelle religion/groupe ethnique/tribu appartiennent les membres de ce ménage ?**

*Instructions* : Donner une réponse par groupe d'âge uniquement. Passer cette question s'il n'y a aucun membre d'âge >2 ans/≥2 à <5 ans/≥5 à <15 ans/≥15 ans dans ce ménage (voir également questions 2 et 3 de ce formulaire Partie A).

|                                | <2 ans                                                                          | ≥2 to <5 ans                                                                    | ≥5 to <15 ans                                                                   | ≥15 ans                                                                         |
|--------------------------------|---------------------------------------------------------------------------------|---------------------------------------------------------------------------------|---------------------------------------------------------------------------------|---------------------------------------------------------------------------------|
| Religion/Groupe ethnique/Tribu | _____                                                                           | _____                                                                           | _____                                                                           | _____                                                                           |
|                                | <input type="radio"/> 99=Ne sait pas<br><input type="radio"/> 98=Pas de réponse | <input type="radio"/> 99=Ne sait pas<br><input type="radio"/> 98=Pas de réponse | <input type="radio"/> 99=Ne sait pas<br><input type="radio"/> 98=Pas de réponse | <input type="radio"/> 99=Ne sait pas<br><input type="radio"/> 98=Pas de réponse |

**5 La religion/le groupe ethnique/la tribu comme indiqué à la question 4 influence-t-elle/il les différents aspects de l'utilisation des soins de santé pour les membres de ce ménage ?**

*Instructions* : Indiquer un code par catégorie et groupe d'âge uniquement. Passer cette question s'il y a un membre d'âge >2 ans/≥2 à <5 ans/≥5 à <15 ans/≥15 ans dans ce ménage (voir également questions 2 et 3 de ce formulaire Partie A).

|                                                                                                          | <2 ans     | ≥2 à <5 ans | ≥5 to <15 ans    | ≥15 ans          |
|----------------------------------------------------------------------------------------------------------|------------|-------------|------------------|------------------|
|                                                                                                          | [1] Oui    | [2] Non     | [99] Ne sait pas | [98] pas réponse |
| <b>1</b> Visite dans un établissement de santé (hôpital, centre de soins, poste de santé)                | Code _____ | Code _____  | Code _____       | Code _____       |
| <b>2</b> Visite chez un médecin                                                                          | Code _____ | Code _____  | Code _____       | Code _____       |
| <b>3</b> Visite dans une pharmacie                                                                       | Code _____ | Code _____  | Code _____       | Code _____       |
| <b>4</b> Visite chez un guérisseur traditionnel                                                          | Code _____ | Code _____  | Code _____       | Code _____       |
| <b>5</b> Décision d'automédication                                                                       | Code _____ | Code _____  | Code _____       | Code _____       |
| <b>6</b> Décision de non traitement                                                                      | Code _____ | Code _____  | Code _____       | Code _____       |
| <b>7</b> Examen physique - général                                                                       | Code _____ | Code _____  | Code _____       | Code _____       |
| <b>8</b> Examen physique – spécifique, préciser _____                                                    | Code _____ | Code _____  | Code _____       | Code _____       |
| <b>9</b> Prélèvements d'échantillons (sang, urine, selles, frottis, écouvillons, liquide cérebro-spinal) | Code _____ | Code _____  | Code _____       | Code _____       |
| <b>10</b> Diagnostics - diagnostics généraux de laboratoire                                              | Code _____ | Code _____  | Code _____       | Code _____       |
| <b>11</b> Diagnostics – diagnostics spécifiques de laboratoire, préciser _____                           | Code _____ | Code _____  | Code _____       | Code _____       |
| <b>12</b> Diagnostics Imagerie générale                                                                  | Code _____ | Code _____  | Code _____       | Code _____       |
| <b>13</b> Diagnostics Imagerie spécifique, préciser _____                                                | Code _____ | Code _____  | Code _____       | Code _____       |
| <b>14</b> Diagnostics Autre, préciser _____                                                              | Code _____ | Code _____  | Code _____       | Code _____       |
| <b>15</b> Traitement Médication générale                                                                 | Code _____ | Code _____  | Code _____       | Code _____       |
| <b>16</b> Traitement Médication spécifique, préciser _____                                               | Code _____ | Code _____  | Code _____       | Code _____       |
| <b>17</b> Traitement Autre médication, préciser _____                                                    | Code _____ | Code _____  | Code _____       | Code _____       |

|                                                                                           |            |            |            |            |
|-------------------------------------------------------------------------------------------|------------|------------|------------|------------|
| <b>18</b> Traitement Interventions (autres que chirurgie), préciser _____                 | Code _____ | Code _____ | Code _____ | Code _____ |
| <b>19</b> Traitement Chirurgie                                                            | Code _____ | Code _____ | Code _____ | Code _____ |
| <b>20</b> Hospitalisation <7 jours                                                        | Code _____ | Code _____ | Code _____ | Code _____ |
| <b>21</b> Hospitalisation ≥7 jours                                                        | Code _____ | Code _____ | Code _____ | Code _____ |
| <b>22</b> Services d'urgence                                                              | Code _____ | Code _____ | Code _____ | Code _____ |
| <b>23</b> Soins prénatals                                                                 | Code _____ | Code _____ | Code _____ | Code _____ |
| <b>24</b> Soins postnatals                                                                | Code _____ | Code _____ | Code _____ | Code _____ |
| <b>25</b> Médecine préventive                                                             | Code _____ | Code _____ | Code _____ | Code _____ |
| <b>26</b> Vaccination                                                                     | Code _____ | Code _____ | Code _____ | Code _____ |
| <b>27</b> Soins à domicile (personnes âgées, handicapés, malades chroniques/à long terme) | Code _____ | Code _____ | Code _____ | Code _____ |
| <b>28</b> Thérapie de soutien (physiothérapie, ergothérapie, réhabilitation)              | Code _____ | Code _____ | Code _____ | Code _____ |

### **VACCINATION**

**6 Comment les enfants de ce ménage ont-ils été nourris pendant les 6 premiers mois de leur vie ?**

*Instructions :* Passer cette question s'il n'y a pas d'enfants de sexe masculin ou féminin dans ce ménage (voir également questions 2 et 3 de ce formulaire partie A).

- 1=Lait maternisé exclusivement  
 2=Lait maternisé et autres aliments, préciser \_\_\_\_\_  
 3=Allaitement et autres aliments, préciser \_\_\_\_\_  
 4=Lait maternisé et allaitement  
 5=Allaitement exclusivement  
 6=Autre, préciser \_\_\_\_\_  
 99=Ne sait pas  
 98=Pas de réponse

**7 Quelle source d'approvisionnement en eau était-elle habituellement utilisée pour préparer le lait maternisé ou le lait maternisé et d'autres aliments comme indiqué à la question 6 pour les enfants de ce ménage ?**

*Instructions :* Passer cette question s'il n'y a pas d'enfants dans ce ménage (voir également les questions 2 et 3 de ce formulaire Partie A).

- 1=Eau du robinet (à l'intérieur de l'habitation, privé)  
 2=Eau du robinet (à l'extérieur de l'habitation, arrière- cour/cour, privé)  
 3=Eau du robinet (à l'extérieur de l'habitation, public, partagé)  
 4=Borne-fontaine/Eau courante (à l'intérieur de l'habitation, privé)  
 5=Borne-fontaine/Eau courante (à l'extérieur de l'habitation, arrière- cour/cour, privé)  
 6=Borne-fontaine/Eau courante (à l'extérieur de l'habitation, public, partagé)  
 7=Camion-citerne (public, partagé)  
 8=Eau en bouteille  
 9=Eaux de surface (lac, étang, rivière, ruisseau)  
 10=Eaux de surface (canal, canal d'irrigation)  
 11=Eau de source  
 12=Eau de pluie  
 13=Puits/Puits de forage (ouvert/non couvert/non protégé)  
 14=Puits/Puits de forage (couvert/protégé)  
 15=NO FORMULA/OTHER FEEDS PREPARED  
 16=Autre, préciser \_\_\_\_\_       99=Ne sait pas       98=Pas de réponse

**8 Est-ce que les enfants de ce ménage ont été vaccinés depuis leur naissance, y compris les vaccins de naissance ?**

*Instructions* : Indiquer un code par catégorie et par enfant uniquement. Passer cette question s'il n'y a aucun enfant dans ce ménage (voir également les questions 2 et 3 de ce formulaire PartieA). Se référer à la question 9 « Formulaire 3 Partie A – Données démographiques/Informations générales sur le ménage » et indiquer les initiales/identificateur du/des membre(s).

| Enfant 1                                                                                                                                                           | Enfant 2                                     | Enfant 3                              | Enfant 4                      |
|--------------------------------------------------------------------------------------------------------------------------------------------------------------------|----------------------------------------------|---------------------------------------|-------------------------------|
| Initiales/Identifiant : _____                                                                                                                                      | Initiales/Identifiant : _____                | Initiales/Identifiant : _____         | Initiales/Identifiant : _____ |
| [1] OUI, vacciné                                                                                                                                                   | [5] Non, manque de vaccins                   | [9] Non, EDS débordé                  |                               |
| [2] Non, parent/tuteur débordé                                                                                                                                     | [6] Non, enfant trop jeune/vieux             | [10] Non, enfant malade               |                               |
| [3] Non, parent/tuteur a décidé que pas nécessaire                                                                                                                 | [7] Non, parent/tuteur a refusé/trop inquiet | [11] Non, pas de carte de vaccination |                               |
| [4] Non, ne sait pas où aller                                                                                                                                      | [8] Non, Autre, préciser _____               | [99] Don't know                       | [98] No response              |
| <b>8.1 Diphtérie et tétanos et coqueluche et <i>Haemophilus influenza</i> et vaccin contre l'hépatite B / DTwPHibHepB</b> (par exemple 6/8, 10/12, 14/16 semaines) |                                              |                                       |                               |
| Code _____                                                                                                                                                         | Code _____                                   | Code _____                            | Code _____                    |
| <b>8.2 Anatoxine tétanique (TT)</b> (par exemple, 1er contact, grossesse, 1, 6, 12/24 mois)                                                                        |                                              |                                       |                               |
| Code _____                                                                                                                                                         | Code _____                                   | Code _____                            | Code _____                    |
| <b>8.3 Anatoxine tétanique et diphtérique (TD)</b> (par exemple, grossesse avec un premier contact, 1, 6, 12 mois)                                                 |                                              |                                       |                               |
| Code _____                                                                                                                                                         | Code _____                                   | Code _____                            | Code _____                    |
| <b>8.4 Tuberculose / BCG</b> (à la naissance)                                                                                                                      |                                              |                                       |                               |
| Code _____                                                                                                                                                         | Code _____                                   | Code _____                            | Code _____                    |
| <b>8.5 Rotavirus / RV</b> (par exemple 6/8, 10/12, 16 semaines)                                                                                                    |                                              |                                       |                               |
| Code _____                                                                                                                                                         | Code _____                                   | Code _____                            | Code _____                    |
| <b>8.6 Rougeole / rougeole et rubéole (MR)</b> (par exemple 9, 15/18 mois)                                                                                         |                                              |                                       |                               |
| Code _____                                                                                                                                                         | Code _____                                   | Code _____                            | Code _____                    |
| <b>8.7 Polio / VPO</b> (par exemple naissance, 6/8, 10/12, 14/16 semaines)                                                                                         |                                              |                                       |                               |
| Code _____                                                                                                                                                         | Code _____                                   | Code _____                            | Code _____                    |
| <b>8.8 Pneumocoque / PCV</b> (par exemple 6/8, 10/12, 14/16 semaines)                                                                                              |                                              |                                       |                               |
| Code _____                                                                                                                                                         | Code _____                                   | Code _____                            | Code _____                    |
| <b>8.9 Fièvre jaune (YF)</b> (par exemple 9 mois)                                                                                                                  |                                              |                                       |                               |
| Code _____                                                                                                                                                         | Code _____                                   | Code _____                            | Code _____                    |
| <b>8.10 Autres vaccins</b>                                                                                                                                         |                                              |                                       |                               |
| Préciser, _____                                                                                                                                                    | Préciser, _____                              | Préciser, _____                       | Préciser, _____               |
| Préciser, _____                                                                                                                                                    | Préciser, _____                              | Préciser, _____                       | Préciser, _____               |
| Préciser, _____                                                                                                                                                    | Préciser, _____                              | Préciser, _____                       | Préciser, _____               |
| Préciser, _____                                                                                                                                                    | Préciser, _____                              | Préciser, _____                       | Préciser, _____               |

**PERCEPTION DE LA MALADIE****9 Connaissance, perception, causes et prévention des maladies infectieuses communes**

| Maladie                   | <b>9.1 Maladie connue des membres du ménage ?</b><br>[1] Oui<br>[2] Non<br>[99] Ne sait pas<br>[98] Pas de réponse | <b>9.2 Perception de la maladie par les membres du ménage</b><br><i>Instruction</i> : Décrire brièvement si elle est connue. | <b>9.3 Causes de la maladie connue des membres du ménage ?</b><br><i>Instructions</i> : Indiquer tous les codes (liste A) qui s'appliquent; plus d'une réponse est possible | <b>9.4 Mesures pour prévenir la maladie connues des membres du ménage ?</b><br><i>Instructions</i> : Indiquer tous les codes (liste B) qui s'appliquent ; plus d'une réponse est possible. | <b>9.5 Mesures pour prévenir la maladie utilisées par les membres du foyer ?</b><br><i>Instructions</i> : Indiquer tous les codes (liste B) qui s'appliquent ; il peut y avoir plus d'une réponse. |
|---------------------------|--------------------------------------------------------------------------------------------------------------------|------------------------------------------------------------------------------------------------------------------------------|-----------------------------------------------------------------------------------------------------------------------------------------------------------------------------|--------------------------------------------------------------------------------------------------------------------------------------------------------------------------------------------|----------------------------------------------------------------------------------------------------------------------------------------------------------------------------------------------------|
| <b>A.</b> Fièvre typhoïde | Code _____                                                                                                         |                                                                                                                              | Code _____                                                                                                                                                                  | Code _____                                                                                                                                                                                 | Code _____                                                                                                                                                                                         |
| <b>B.</b> Choléra         | Code _____                                                                                                         |                                                                                                                              | Code _____                                                                                                                                                                  | Code _____                                                                                                                                                                                 | Code _____                                                                                                                                                                                         |
| <b>C.</b> Paludisme       | Code _____                                                                                                         |                                                                                                                              | Code _____                                                                                                                                                                  | Code _____                                                                                                                                                                                 | Code _____                                                                                                                                                                                         |
| <b>D.</b> Grippe          | Code _____                                                                                                         |                                                                                                                              | Code _____                                                                                                                                                                  | Code _____                                                                                                                                                                                 | Code _____                                                                                                                                                                                         |
| <b>E.</b> Méningite       | Code _____                                                                                                         |                                                                                                                              | Code _____                                                                                                                                                                  | Code _____                                                                                                                                                                                 | Code _____                                                                                                                                                                                         |
| <b>F.</b> Hépatite E      | Code _____                                                                                                         |                                                                                                                              | Code _____                                                                                                                                                                  | Code _____                                                                                                                                                                                 | Code _____                                                                                                                                                                                         |
| <b>G.</b> Tuberculose     | Code _____                                                                                                         |                                                                                                                              | Code _____                                                                                                                                                                  | Code _____                                                                                                                                                                                 | Code _____                                                                                                                                                                                         |
| <b>H.</b> VIH/SIDA        | Code _____                                                                                                         |                                                                                                                              | Code _____                                                                                                                                                                  | Code _____                                                                                                                                                                                 | Code _____                                                                                                                                                                                         |

| Liste A: Causes possibles                          | Liste B: Mesures préventives possibles                               |
|----------------------------------------------------|----------------------------------------------------------------------|
| [1] Consommation d'alcool<br>[2] Temps/sorcellerie | [1] Pas de consommation d'alcool<br>[2] Dormir sous une moustiquaire |

|                                                                                                                                                   |                                                                                                                                                               |
|---------------------------------------------------------------------------------------------------------------------------------------------------|---------------------------------------------------------------------------------------------------------------------------------------------------------------|
| [3] Piqûre de moustique/d'insecte                                                                                                                 | [3] Utiliser des sprays insecticides/anti-moustiques                                                                                                          |
| [4] Morsure de chien                                                                                                                              | [4] Maintenir la maison et ses environs immédiats propres                                                                                                     |
| [5] Boire de l'eau non traitée de surface/de source (lac, étang, rivière, ruisseau, canal, canal d'irrigation)                                    | [5] Avoir une pratique correcte de l'élimination des déchets humains et domestiques                                                                           |
| [6] Contact physique étroit/baiser/embrassade                                                                                                     | [6] Éviter le contact rapproché avec des chiens                                                                                                               |
| [7] Manger des produits alimentaires crus comme des légumes/de la salade, des fruits, des produits laitiers, des œufs, de la viande ou du poisson | [7] Traiter l'eau (faire bouillir, filtration, désinfection solaire, sédimentation, chloration)                                                               |
| [8] Ne pas se laver les mains correctement en préparant la nourriture/les repas                                                                   | [8] Ne pas cuisiner/préparer la nourriture/les repas avec de l'eau non traitée                                                                                |
| [9] Ne pas se laver les mains correctement avant/après être allé aux toilettes                                                                    | [9] Ne pas laver les produits alimentaires à consommer crus avec de l'eau non traitée                                                                         |
| [10] Contact avec du sang humain (injection, transfusion, chirurgie)                                                                              | [10] Faire bouillir/chauffer à nouveau les restes/les aliments/repas préparés avant de les consommer                                                          |
| [11] Consommation de sang animal cru                                                                                                              | [11] Ne pas manger des produits alimentaires crus comme légumes/salade, fruits, produits laitiers, œufs, viande ou poisson                                    |
| [12] Autre, préciser _____                                                                                                                        | [12] Couvrir les produits alimentaires/repas                                                                                                                  |
| [99] Ne sait pas                                                                                                                                  | [13] Protéger les produits alimentaires/repas contre les mouches                                                                                              |
| [98] Pas de réponse                                                                                                                               | [14] Éviter la nourriture/les boissons des vendeurs de rue                                                                                                    |
|                                                                                                                                                   | [15] Éviter le contact rapproché avec les personnes malades                                                                                                   |
|                                                                                                                                                   | [16] Pas de contact physique étroit/baisers/embrassades                                                                                                       |
|                                                                                                                                                   | [17] Se couvrir le nez/la bouche en éternuant/toussant                                                                                                        |
|                                                                                                                                                   | [18] Pas de contact/consommation de sang humain/animal                                                                                                        |
|                                                                                                                                                   | [19] Avoir une bonne hygiène des mains en préparant la nourriture/les repas (se laver les mains avec du savon et de l'eau, se laver les mains par frottement) |
|                                                                                                                                                   | [20] Avoir une bonne hygiène des mains avant/après être allé aux toilettes (se laver les mains avec du savon et de l'eau, se laver les mains par frottement)  |
|                                                                                                                                                   | [21] Autre, préciser _____                                                                                                                                    |
|                                                                                                                                                   | [99] Ne sait pas                                                                                                                                              |
|                                                                                                                                                   | [98] Pas de réponse                                                                                                                                           |

**10 Pour quels membres de ce ménage les mesures préventives listées à la questions 9.5 contre la fièvre typhoïde sont-elles utilisées ?**

*Instructions* : Cocher plusieurs cases si nécessaire ; il peut y avoir plus d'une réponse.

- 1=<2 ans                       3= $\geq$ 5 à <15 ans                       5=PAS UTILISÉ                       99=Ne sait pas  
 2= $\geq$ 2 à < 5 ans                       4= $\geq$ 15 ans                       98=Pas de réponse

**11 Nommer les membres du ménage pour lesquels une fièvre typhoïde a été diagnostiquée dans les 3 derniers mois. Quels éléments de diagnostic ont été utilisés pour confirmer la fièvre typhoïde?**

*Instructions* : Indiquer plusieurs codes si nécessaire pour chaque membre du ménage ; il peut y avoir plus d'une réponse.

| Membre 1<br>Initiales/Identifiant: __ | Membre 2<br>Initiales/Identifiant: __ | Membre 3<br>Initiales/Identifiant: __                         | Membre 4<br>Initiales/Identifiant: __ |
|---------------------------------------|---------------------------------------|---------------------------------------------------------------|---------------------------------------|
| [1] Hémostoculture                    | [3] Test sanguin/de Widal             | [5] Pas applicable (pas diagnostiqué avec la fièvre typhoïde) |                                       |
| [2] Coproculture                      | [4] Autre test, préciser _____        | [99] Ne sait pas                                              | [98] Pas de réponse                   |
| Code _____                            | Code _____                            | Code _____                                                    | Code _____                            |

**12 (Où les membres de ce ménage indiqués à la question 11 ont-ils été diagnostiqués pour la fièvre typhoïde?) Où les membres de ce ménage ont-ils recherché des soins de santé?**

*Instructions* : Indiquer un code par membre du ménage uniquement.

| Membre 1<br>Initiales/Identifiant: __      | Membre 2<br>Initiales/Identifiant: __     | Membre 3<br>Initiales/Identifiant: __ | Membre 4<br>Initiales/Identifiant: __ |
|--------------------------------------------|-------------------------------------------|---------------------------------------|---------------------------------------|
| [1] Établissement de santé, préciser _____ | [6] Nulle part, pas de recherche de soins |                                       |                                       |
| [2] Médecin                                | [7] Autre, préciser _____                 |                                       |                                       |
| [3] Nulle part, automédication             | [8] Pas applicable                        |                                       |                                       |
| [4] Guérisseur traditionnel                | [99] Ne sait pas                          |                                       |                                       |
| [5] Pharmacien                             | [98] Pas de réponse                       |                                       |                                       |
| Code _____                                 | Code _____                                | Code _____                            | Code _____                            |

**13 (Les membres de ce ménage pour lesquels une fièvre typhoïde a été diagnostiquée comme indiqué à la question 11 ont-ils reçu un traitement?) Quel traitement ont-ils reçu?**

*Instructions* : Cocher une réponse par membre du ménage uniquement.

| Membre 1<br>Initiales/Identifiant: __              | Membre 2<br>Initiales/Identifiant: __              | Membre 3<br>Initiales/Identifiant: __              | Membre 4<br>Initiales/Identifiant: __              |
|----------------------------------------------------|----------------------------------------------------|----------------------------------------------------|----------------------------------------------------|
| <input type="radio"/> 1=Traitement, préciser _____ | <input type="radio"/> 1=Traitement, préciser _____ | <input type="radio"/> 1=Traitement, préciser _____ | <input type="radio"/> 1=Traitement, préciser _____ |
| <input type="radio"/> 2=Pas applicable             | <input type="radio"/> 2=Pas applicable             | <input type="radio"/> 2=Pas applicable             | <input type="radio"/> 2=Pas applicable             |
| <input type="radio"/> 99=Ne sait pas               | <input type="radio"/> 99=Ne sait pas               | <input type="radio"/> 99=Ne sait pas               | <input type="radio"/> 99=Ne sait pas               |
| <input type="radio"/> 98=Pas de réponse            | <input type="radio"/> 98=Pas de réponse            | <input type="radio"/> 98=Pas de réponse            | <input type="radio"/> 98=Pas de réponse            |

Site \_\_\_\_ Sous-zone \_\_\_\_ Numéro d'habitation \_\_\_\_ Identifiant de l'enquêteur \_\_\_\_

**FORMULAIRE 5: ÉVALUATION DE L'UTILISATION RÉELLE DES SOINS DE SANTÉ GLOBAUX, STRATIFIÉE SELON L'ÂGE ET LE SEXE**

**Partie A: Évaluation de l'utilisation *réelle* des soins de santé**  
**COMPORTEMENT DE RECHERCHE DE SOINS**

**1 Consigner ci-dessous l'apparition de signe(s) ou symptôme(s) (voir liste 1) et préciser où (voir liste 2) et comment le(s) membre(s) a/ont recherché les soins de santé durant les 3 derniers mois ?**

*Instructions* : voir « formulaire 3- partie A-INFORMATIONS GENERALES SUR LE MENAGE » pour obtenir les initiaux/identifiants de chacun des membres du ménage. Indiquer seulement un signe/symptôme par ligne. Commencer avec une nouvelle ligne pour tous nouveaux soins de santé sélectionnés pour chaque signe/symptôme récurrent. Indiquer le nombre des apparitions de chaque signe/symptômes durant les 3 derniers mois. Si une différente option de soins de santé a été sélectionnée pour un signe/symptôme récurrent, indiquer cela dans une nouvelle ligne. Compléter s'il vous plaît, un formulaire supplémentaire s'il y a eu plus de 20 signes/symptômes apparus durant les 3 derniers mois.

| Liste 1:<br>Signe/Symptôme                    |                                                                              | Liste 2:<br>Option de soins de santé |
|-----------------------------------------------|------------------------------------------------------------------------------|--------------------------------------|
| [A] Fièvre                                    | [N] Nausée/Vomissements                                                      | [1] EDS-SETA,<br>Code _____          |
| [B] Fièvre <3 jours (continus)                | [O] Diarrhée (liquide/sanglante/mucopurulente)                               | [2] Autre EDS<br>Code _____          |
| [C] Fièvre ≥3 jours (continus)                | [P] Douleur abdominale/Douleur intestinale                                   | [3] Médecin                          |
| [D] Frissons/Tremblements                     | [Q] Perte de sang/Hémorragie (interne)                                       | [4] Pharmacie                        |
| [E] Convulsion                                | [R] Perte de sang/Hémorragie (externe)                                       | [5] Guérisseur traditionnel          |
| [F] Perte de poids                            | [S] Éternuements Nez qui coule                                               | [6] Nulle part Auto-médication       |
| [G] Déshydratation                            | [T] Toux                                                                     | [7] Nulle part Rien                  |
| [H] Malaise/Faibles/Fatigue                   | [U] Respiration rapide/Essoufflement                                         |                                      |
| [I] Douleurs (muscles/articulations/os)       | [V] Difficultés respiratoires graves                                         |                                      |
| [J] Maux de tête                              | [W] Inflammation de la peau (éruptions cutanées/ rougeurs/pus/démangeaisons) |                                      |
| [K] Vertiges/Confusion/ Perte de connaissance | [X] Gonflement/Œdème                                                         |                                      |
| [L] Troubles de la pression sanguine          | [Y] Jaunisse                                                                 |                                      |
| [M] Troubles cardiaques                       |                                                                              |                                      |

| No. | Membre du ménage<br>Enregistrer les initiaux/identifiants du membre du ménage ; voir formulaire 3 – partie A- INFORMATIONS GENERALES SUR LE MENAGE » | Signes/<br>Symptômes<br>Utiliser la Liste 1 pour sélectionner le code | Options de soins de santé                     |          | Fréquence<br>Indiquer le nombre d'incidences pour le signe/symptôme listé |
|-----|------------------------------------------------------------------------------------------------------------------------------------------------------|-----------------------------------------------------------------------|-----------------------------------------------|----------|---------------------------------------------------------------------------|
|     |                                                                                                                                                      |                                                                       | Utiliser la Liste 2 pour sélectionner le code | EDS Code |                                                                           |
| 1   |                                                                                                                                                      |                                                                       |                                               |          |                                                                           |
| 2   |                                                                                                                                                      |                                                                       |                                               |          |                                                                           |
| 3   |                                                                                                                                                      |                                                                       |                                               |          |                                                                           |
| 4   |                                                                                                                                                      |                                                                       |                                               |          |                                                                           |
| 5   |                                                                                                                                                      |                                                                       |                                               |          |                                                                           |

1  
2  
3  
4  
5  
6  
7  
8  
9  
10  
11  
12  
13  
14  
15  
16  
17  
18  
19  
20  
21  
22  
23  
24  
25  
26  
27  
28  
29  
30  
31  
32  
33  
34  
35  
36  
37  
38  
39  
40  
41  
42  
43  
44  
45  
46  
47  
48  
49  
50  
51  
52  
53  
54  
55  
56  
57  
58  
59  
60

|    |  |  |  |  |
|----|--|--|--|--|
| 6  |  |  |  |  |
| 7  |  |  |  |  |
| 8  |  |  |  |  |
| 9  |  |  |  |  |
| 10 |  |  |  |  |
| 11 |  |  |  |  |
| 12 |  |  |  |  |
| 13 |  |  |  |  |
| 14 |  |  |  |  |
| 15 |  |  |  |  |
| 16 |  |  |  |  |
| 17 |  |  |  |  |
| 18 |  |  |  |  |
| 19 |  |  |  |  |
| 20 |  |  |  |  |

For peer review only



## Appendix 4/Supplementary file 4: Geospatial random selection with application of simple, weighted-stratified sampling (examples of Ghana and Madagascar)

**Figure 1** Geographic random points generated by ArcGIS for Asante Akim North and Central, Ghana

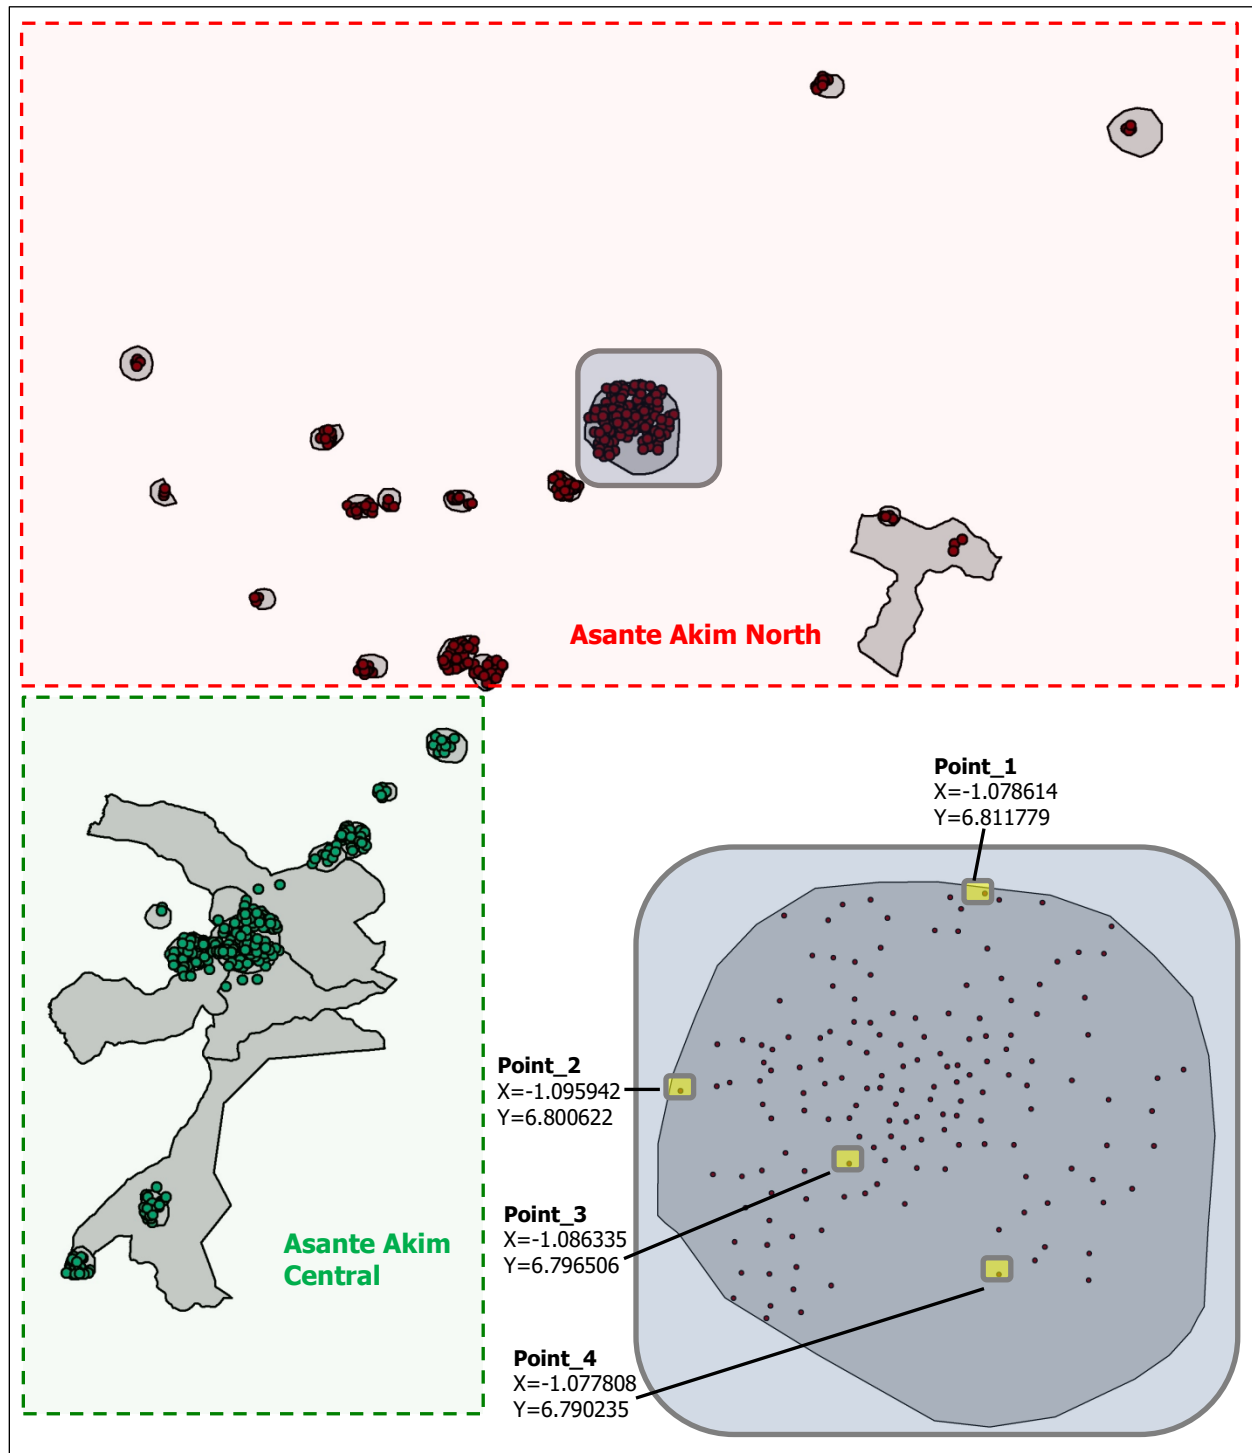

The study area of Asante Akim North (light red rectangle) and Asante Akim Central (light green rectangle) is highlighted in grey. The geographic random points are shown as red and green points for Asante Akim North and Asante Akim Central, respectively. The illustration at the bottom, right highlighted in light blue shows the enlarged area that is indicated as a small central light blue highlighted rectangle. The X- and Y-data of four geographic random points are given as examples; points are indicated as yellow highlighted rectangles. ArcGIS-generated geographic random points converted and visualized in Google Earth Pro<sup>®</sup> for Asante Akim North and Central, Ghana, can be shared on request.

**Figure 2 Geographic random points generated by ArcGIS for Renivohitra/Antananarivo, Madagascar**

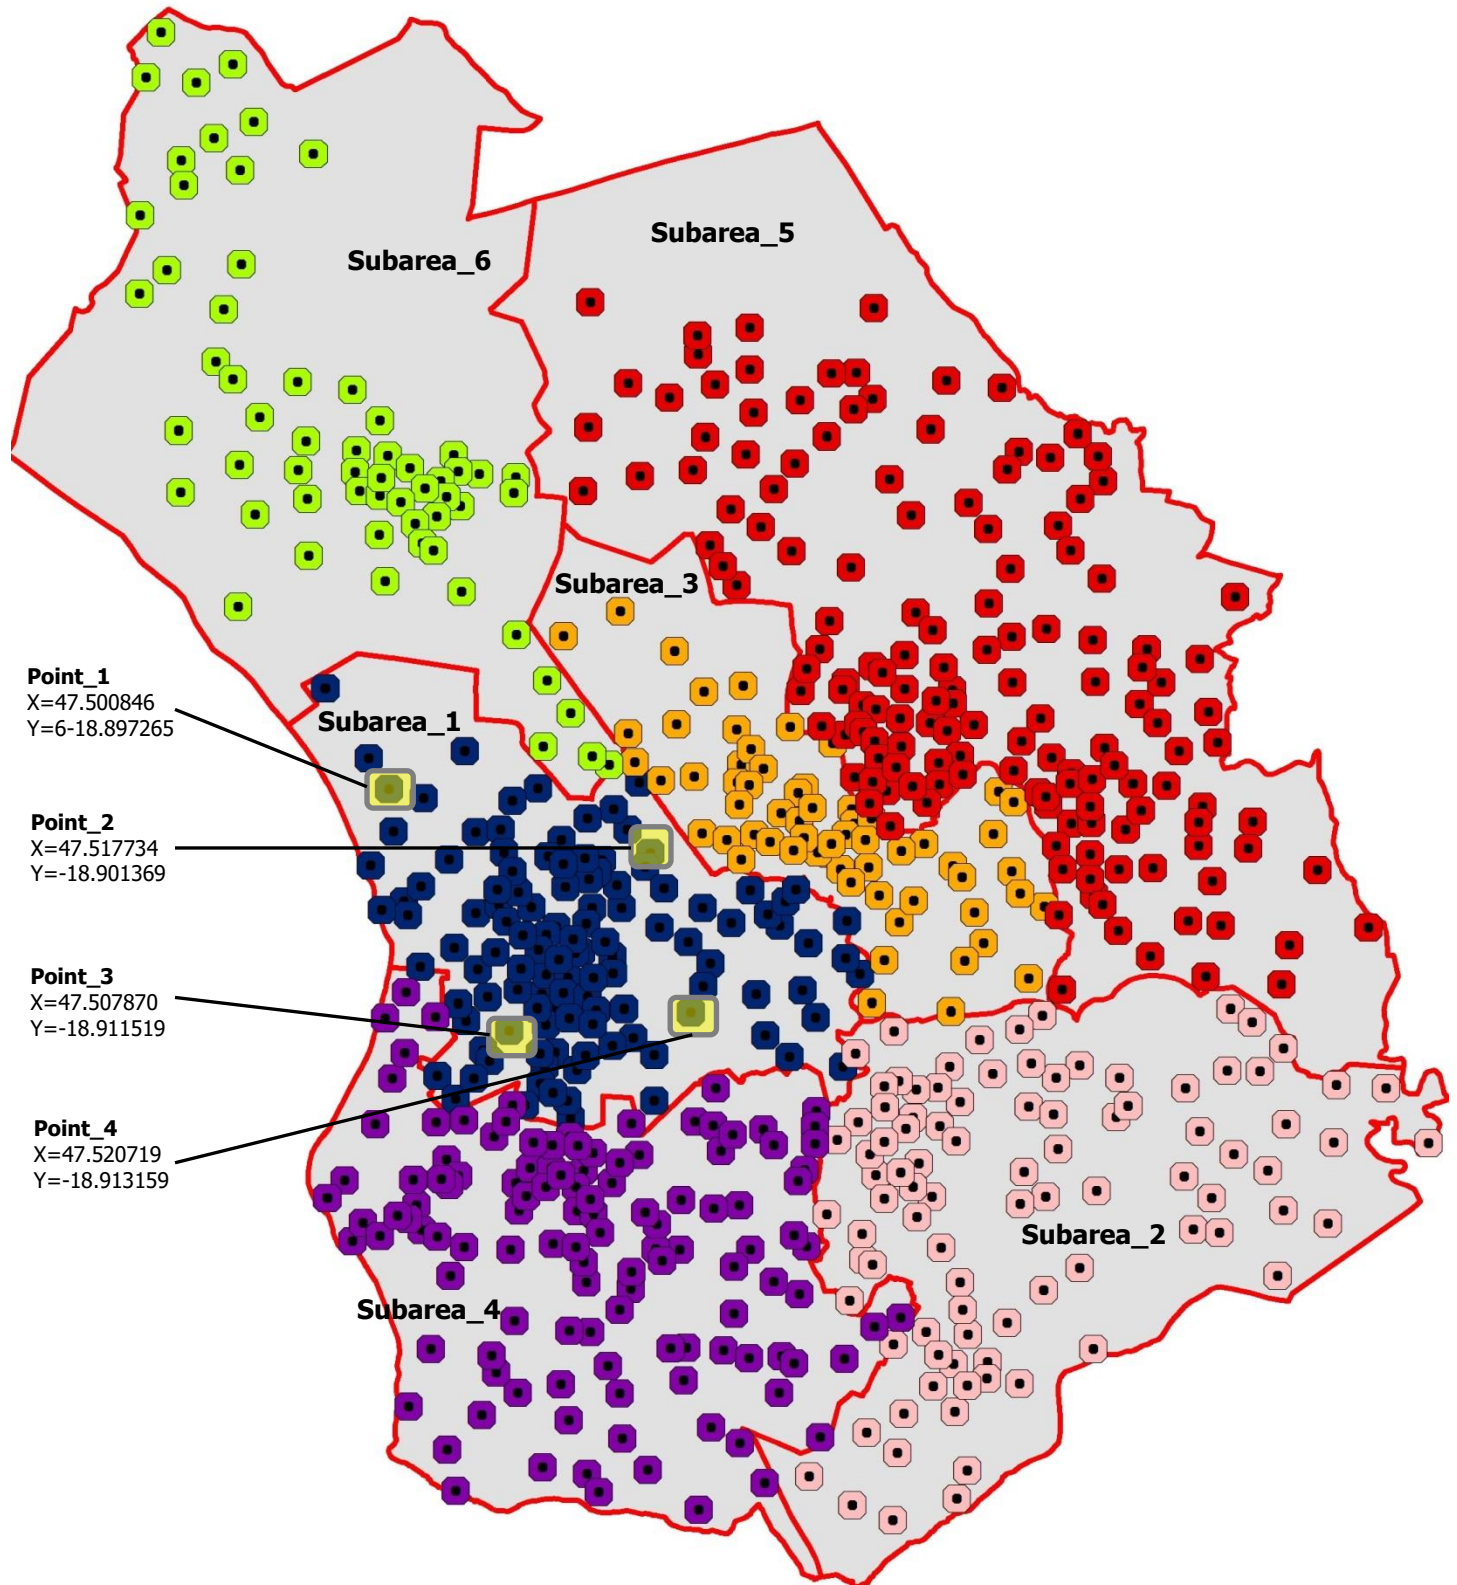

The study area of Renivohitra/Antananarivo, which is subdivided into six administrative subareas, is highlighted in grey. The geographic random points are shown as blue (subarea\_1), pink (subarea\_2), orange (subarea\_3), purple (subarea\_4), red (subarea\_5) and green (subarea\_6) points. The X- and Y-data of four geographic random points are given as examples; points are indicated as yellow highlighted rectangles. ArcGIS-generated geographic random points converted and visualized in Google Earth Pro<sup>®</sup> for Renivohitra/Antananarivo, Madagascar, can be shared on request.

**Appendix 5/Supplementary file 5: System diagram of the data collection and data management platform: the Android application “HPA Collect” and the platform “HPA Web”**

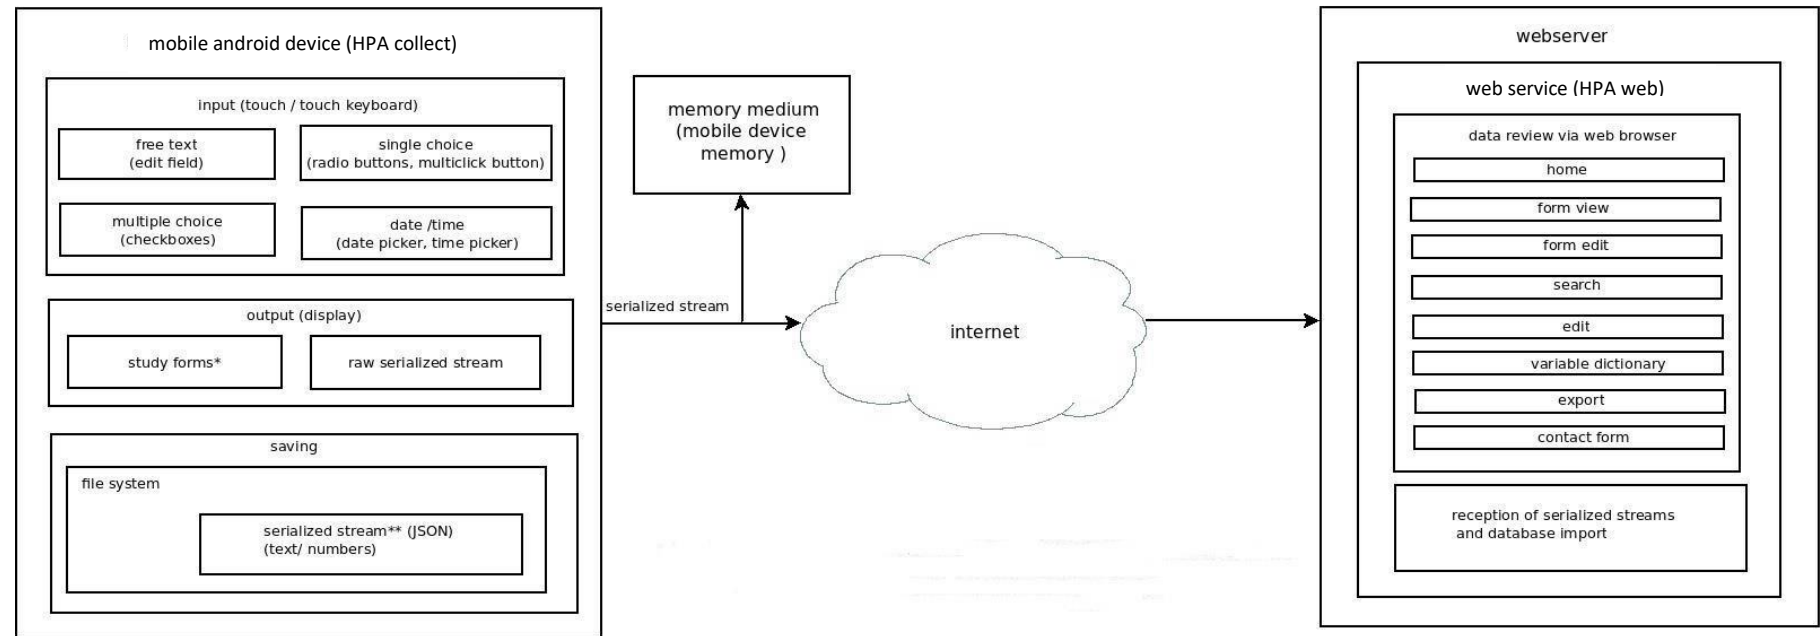

Note. \*study forms: Form 1, Form 3 Part A to C, Form 4 Part A to B, Form 5; \*\*serialized stream: two- or more-dimensional data (e.g. a table) is brought to a one-dimensional form; the application uses the JSON (Java Script Object Notation) format.

# BMJ Open

## The HPAfrica Study Protocol: Assessment of health behavior and population-based socio-economic, hygiene behavioral factors - a standardized repeated cross-sectional study in multiple cohorts in sub-Saharan Africa

|                               |                                                                                                                                                                                                                                                                                                                                                                                                                                                                                                                                                                                                                                                                                                                                                                                                                                                                                                                                                                                                                                                                                                                                                                                                                                                                                                                                                                                                                                                                                                                                                                                                                                                                                                                                                                                                                                                                                                                                                                                                                                                                                                                                                                                     |
|-------------------------------|-------------------------------------------------------------------------------------------------------------------------------------------------------------------------------------------------------------------------------------------------------------------------------------------------------------------------------------------------------------------------------------------------------------------------------------------------------------------------------------------------------------------------------------------------------------------------------------------------------------------------------------------------------------------------------------------------------------------------------------------------------------------------------------------------------------------------------------------------------------------------------------------------------------------------------------------------------------------------------------------------------------------------------------------------------------------------------------------------------------------------------------------------------------------------------------------------------------------------------------------------------------------------------------------------------------------------------------------------------------------------------------------------------------------------------------------------------------------------------------------------------------------------------------------------------------------------------------------------------------------------------------------------------------------------------------------------------------------------------------------------------------------------------------------------------------------------------------------------------------------------------------------------------------------------------------------------------------------------------------------------------------------------------------------------------------------------------------------------------------------------------------------------------------------------------------|
| Journal:                      | <i>BMJ Open</i>                                                                                                                                                                                                                                                                                                                                                                                                                                                                                                                                                                                                                                                                                                                                                                                                                                                                                                                                                                                                                                                                                                                                                                                                                                                                                                                                                                                                                                                                                                                                                                                                                                                                                                                                                                                                                                                                                                                                                                                                                                                                                                                                                                     |
| Manuscript ID                 | bmjopen-2017-021438.R3                                                                                                                                                                                                                                                                                                                                                                                                                                                                                                                                                                                                                                                                                                                                                                                                                                                                                                                                                                                                                                                                                                                                                                                                                                                                                                                                                                                                                                                                                                                                                                                                                                                                                                                                                                                                                                                                                                                                                                                                                                                                                                                                                              |
| Article Type:                 | Protocol                                                                                                                                                                                                                                                                                                                                                                                                                                                                                                                                                                                                                                                                                                                                                                                                                                                                                                                                                                                                                                                                                                                                                                                                                                                                                                                                                                                                                                                                                                                                                                                                                                                                                                                                                                                                                                                                                                                                                                                                                                                                                                                                                                            |
| Date Submitted by the Author: | 31-Aug-2018                                                                                                                                                                                                                                                                                                                                                                                                                                                                                                                                                                                                                                                                                                                                                                                                                                                                                                                                                                                                                                                                                                                                                                                                                                                                                                                                                                                                                                                                                                                                                                                                                                                                                                                                                                                                                                                                                                                                                                                                                                                                                                                                                                         |
| Complete List of Authors:     | <p>Pak, GiDeok; International Vaccine Institute, Biostatistics &amp; Data Management</p> <p>Haselbeck, Andrea; International Vaccine Institute, Epidemiology</p> <p>Seo, Hyeong-Won; International Vaccine Institute, Biostatistics &amp; Data Management</p> <p>Osei, Isaac; Kumasi Centre for Collaborative Research in Tropical Medicine, Kwame Nkrumah University of Science and Technology (KNUST)</p> <p>Amuasi, John; Kumasi Centre for Collaborative Research in Tropical Medicine, Kwame Nkrumah University of Science and Technology (KNUST)</p> <p>Breiman, Robert; Emory University , Global Health Institute</p> <p>Cruz Espinosa, Ligia Maria; International Vaccine Institute, Epidemiology</p> <p>Holm, Marianne; International Vaccine Institute, Epidemiology</p> <p>Im, Justin; International Vaccine Institute, Epidemiology</p> <p>Jang, Geun-Hyeog; International Vaccine Institute, Biostatistics &amp; Data Management</p> <p>Jeon, Hyonjin; International Vaccine Institute, Epidemiology</p> <p>Luby, Stephen; Stanford University Division of Infectious Diseases and Geographic Medicine</p> <p>Lunguya-Metila, Octavie; Institut National de Recherche Biomedicales; Service de Microbiologie, Cliniques Universitaires de Kinshasa</p> <p>MacWright, William; Global Health Institute, Emory University</p> <p>Mogeni, Ondari; International Vaccine Institute, Epidemiology</p> <p>Okeke, Iruka; University of Ibadan</p> <p>Owusu-Dabo, Ellis; Kwame Nkrumah Univeristy of Science and Technology, School of Public Health</p> <p>Park, Jin Kyung; International Vaccine Institute, Biostatistics &amp; Data Management</p> <p>Park, SeEun; International Vaccine Institute, Epidemiology</p> <p>Popoola, Femi; University of Ibadan</p> <p>Seo, Hye-jin; International Vaccine Institute, Epidemiology</p> <p>Soura, Abdramane ; Institut Superieur des Sciences de la Population, University of Ouagadougou</p> <p>Teferi, Mekonnen; Armauer Hansen Research Institute, ALERT Campus</p> <p>Toy, Trevor; International Vaccine Institute, Epidemiology</p> <p>Chon, Yun; International Vaccine Institute, Biostatistics &amp; Data Management</p> |

|                                      |                                                                                                                                                                                                                                                                                                                                                                                                                                          |
|--------------------------------------|------------------------------------------------------------------------------------------------------------------------------------------------------------------------------------------------------------------------------------------------------------------------------------------------------------------------------------------------------------------------------------------------------------------------------------------|
|                                      | Rafindrakalia, Mathilde; Universite d'Antananarivo<br>Rakotozandrindrainy, Raphael; Universite d'Antananarivo<br>Meyer, Christian; Institute of Tropical Medicine, Eberhard Karls<br>University; Faculty of Medicine, Duy Tan University<br>Marks, Florian ; International Vaccine Institute, Epidemiology; The<br>Department of Medicine, The University of Cambridge<br>Panzner, Ursula; International Vaccine Institute, Epidemiology |
| <b>Primary Subject<br/>Heading</b> : | Epidemiology                                                                                                                                                                                                                                                                                                                                                                                                                             |
| Secondary Subject Heading:           | Epidemiology, Global health, Health services research, Infectious<br>diseases, Public health                                                                                                                                                                                                                                                                                                                                             |
| Keywords:                            | health/hygiene behavior, sanitation, socio-economic, sub-Saharan Africa,<br>HPAfrica study, population sampling frame/spatial sampling                                                                                                                                                                                                                                                                                                   |
|                                      |                                                                                                                                                                                                                                                                                                                                                                                                                                          |

SCHOLARONE™  
Manuscripts

**The HPAfrica Study Protocol: Assessment of health behavior and population-based socio-economic, hygiene behavioral factors - a standardized repeated cross-sectional study in multiple cohorts in sub-Saharan Africa**

**Short Title**

The **Health Population Africa** (HPAfrica) study

**Authors**

Gi-Deok Pak<sup>1#</sup>, Andrea Haselbeck<sup>1#</sup>, Hyeong-Won Seo<sup>1</sup>, Isaac Osei<sup>2</sup>, John Amuasi<sup>2</sup>, Robert F. Breiman<sup>3</sup>, Ligia Maria Cruz Espinoza<sup>1</sup>, Marianne Holm<sup>1</sup>, Justin Im<sup>1</sup>, Geun-Hyeog Jang<sup>1</sup>, Hyon-Jin Jeon<sup>1</sup>, Stephen Luby<sup>4</sup>, Octavie Lunguya-Metila<sup>5,6</sup>, William MacWright<sup>3</sup>, Ondari D. Mogeni<sup>1</sup>, Iruka N. Okeke<sup>7</sup>, Ellis Owusu-Dabo<sup>8</sup>, Jin-Kyung Park<sup>1</sup>, Se Eun Park<sup>1</sup>, Oluwafemi Popoola<sup>7</sup>, Hye-Jin Seo<sup>1</sup>, Abdramane Bassiahi Soura<sup>9</sup>, Mekonnen Teferi<sup>10</sup>, Trevor Toy<sup>1</sup>, Yun Chon<sup>1</sup>, Mathilde Rafindrakalia<sup>11</sup>, Raphael Rakotozandrindrainy<sup>11</sup>, Christian G. Meyer<sup>12,13</sup>, Florian Marks<sup>1,14\*</sup> and Ursula Panzner<sup>1</sup>

**Affiliations**

1. International Vaccine Institute, Seoul, Republic of Korea
2. Kumasi Centre for Collaborative Research in Tropical Medicine, Kwame Nkrumah University of Science and Technology (KNUST), Kumasi, Ghana
3. Global Health Institute, Emory University, Atlanta, United States
4. Infectious Diseases and Geographic Medicine, Stanford University, Stanford, United States
5. Institut National de Recherche Biomédicales, Kinshasa, Democratic Republic of the Congo
6. Service de Microbiologie, Cliniques Universitaires de Kinshasa, Kinshasa, Democratic Republic of the Congo
7. University of Ibadan, Ibadan, Nigeria
8. School of Public Health, Kwame Nkrumah University of Science and Technology, Kumasi, Ghana
9. Institut Supérieur des Sciences de la Population, University of Ouagadougou, Ouagadougou, Burkina Faso
10. Armauer Hansen Research Institute, Jimma Road, ALERT Campus, Addis Ababa, Ethiopia
11. University of Antananarivo, Antananarivo, Madagascar
12. Institute of Tropical Medicine, Eberhard Karls University, Tübingen, Germany
13. Faculty of Medicine, Duy Tan University, Da Nang, Vietnam
14. The Department of Medicine, The University of Cambridge, Cambridge, United Kingdom

# Contributed equally

\*Corresponding Author:

Florian Marks, MPH, PhD, International Vaccine Institute, SNU Research Park, 1 Gwanak-ro, Gwanak-gu, Seoul, 08826, Republic of Korea, Phone: +82-2-881-1133, Fax: +82-2-881-1164, E-mail: fmarks@ivi.int

## 41 **Abstract**

## 42 **Introduction**

43 The objective of the **Health Population Africa** (HPAfrica) study is to determine health behavior and  
44 population-based factors, including socio-economic, ethnographic, hygiene and sanitation factors, at  
45 sites of the Severe Typhoid Fever in Africa (SETA) program. SETA aims to investigate healthcare  
46 facility-based fever surveillance in Burkina Faso, the Democratic Republic of the Congo, Ethiopia,  
47 Ghana, Madagascar, and Nigeria. Meaningful disease burden estimates require adjustment for health  
48 behavior patterns, which are assumed to vary among a study population.

## 50 **Methods and Analysis**

51 For the minimum sample size of household interviews required, the assumptions of an infinite  
52 population, a design effect, and age- and sex-stratification are considered. In the absence of a  
53 population sampling frame or household list, a spatial approach will be used to generate geographic  
54 random points with an Aeronautical Reconnaissance Coverage Geographic Information System  
55 (ArcGIS) tool. Printouts of Google Earth Pro<sup>®</sup> satellite imagery visualize these points. Data of interest  
56 will be assessed in different seasons by applying population-weighted stratified sampling. An  
57 Android-based application and a web service will be developed for electronic data capturing and  
58 synchronization with the database server in real time. Sampling weights will be computed to adjust  
59 for possible differences in selection probabilities. Descriptive data analyses will be performed in order  
60 to assess baseline information of each study population and age- and sex-stratified health behavior.  
61 This will allow adjusting disease burden estimates. In addition, multivariate analyses will be applied  
62 to look into associations between health behavior, population-based factors, and the disease burden as  
63 determined in the SETA study.

## 65 **Ethics and dissemination**

66 Ethic approvals for this protocol were obtained by the Institutional Review Board of the International  
67 Vaccine Institute (IVI, No. 2016-0003) and by all collaborating institutions of participating countries.

1  
2  
3  
4 68 It is anticipated to disseminate findings from this study through publication on a peer-reviewed  
5  
6 69 journal.  
7  
8 70  
9  
10  
11  
12  
13  
14  
15  
16  
17  
18  
19  
20  
21  
22  
23  
24  
25  
26  
27  
28  
29  
30  
31  
32  
33  
34  
35  
36  
37  
38  
39  
40  
41  
42  
43  
44  
45  
46  
47  
48  
49  
50  
51  
52  
53  
54  
55  
56  
57  
58  
59  
60

For peer review only



1  
2  
3  
4 71 **Strengths and limitations of this study**

- 5  
6 72 • Standardization in community-based multi-country/-site research requires cautiousness  
7  
8 73 considering variations in setting, language and culture.  
9  
10 74 • Large-scale public health assessments will complement disease burden data by investigating  
11  
12 75 sources of transmission and infection.  
13  
14 76 • Current population data in study sites and their administratively-defined subareas and  
15  
16 77 population sampling frames are assumed to be limited.  
17  
18 78 • Electronic data collection may cause technical problems related to damage, functional failure,  
19  
20 79 or loss of devices.  
21  
22 80 • Unstable wireless internet connection may limit data teams to update the Android-based  
23  
24 81 application, communicate with study managers in real time, and synchronize collected data  
25  
26 82 with the server.  
27

28 83  
29  
30 84 **Registration:** Not required  
31

32 85

33  
34 86 **Keywords:** health/hygiene behavior, sanitation, socio-economic, population sampling frame/spatial  
35  
36 87 sampling, sub-Saharan Africa, HPAfrica study  
37  
38  
39  
40  
41  
42  
43  
44  
45  
46  
47  
48  
49  
50  
51  
52  
53  
54  
55  
56  
57  
58  
59  
60

## 88 **Introduction**

89 Assessment of health behavior, including healthcare utilization, is an important determinant for the  
90 generation of accurate disease burden estimates among target populations. This is particularly critical  
91 for studies which utilize observational, healthcare facility-based surveillance designs as substantial  
92 variation in health behavior patterns strongly influences disease burden estimates.[1] The adjustment  
93 of disease burden calculations for variation in health behavior will increase the accuracy of measures  
94 of disease occurrence caused by bacterial, fungal, viral, and parasitic pathogens among populations  
95 under investigation. Furthermore, the influence of a large variety of population-based factors on both  
96 health behavior and disease burden has been recognized. This includes socioeconomic factors such as  
97 education, occupation, income, the availability of household assets,[2, 3] ethnical/religious and  
98 cultural factors,[4, 5] but also hygiene and sanitation facilities,[6-10] food handling,[11-14] and  
99 animal contacts.[9]

100

101 The **Health Population Africa** (HPAfrica) study will be conducted in Burkina Faso, the Democratic  
102 Republic of the Congo (DRC), Ethiopia, Ghana, Madagascar, and Nigeria. Experiences from the  
103 Typhoid Fever Surveillance in Africa Program (TSAP) will be transferred to the Severe Typhoid in  
104 Africa (SETA) program.[15, 16] In this program, standardized, healthcare facility-based fever  
105 surveillance is performed at selected study sites in participating countries over a two-year period.[17]  
106 SETA primarily aims to systematically collect information on the burden of severe *Salmonella*  
107 infections. Subjects living in defined catchment areas with either an acute fever episode, a fever  
108 history of  $\geq 3$  consecutive days, clinically-suspected typhoid fever or clinically-diagnosed  
109 gastrointestinal perforations due to typhoid fever will be eligible. In addition, the severity of  
110 *Salmonella* caused illnesses and the natural history of *Salmonella* infection will be recorded with  
111 further analyses on host immune responses and chronic carriage.

112

## 113 **Objectives and Outcomes**

114 The goal of the HPAfrica study is to assess the *generic* and *actual* age- and sex-stratified health

1  
2  
3  
4 115 behavior. *Generic* health behavior pertains to behavior in conditions associated with fever and other  
5  
6 116 signs and symptoms unrelated to onsets, whereas *actual* health behavior is related to onsets (Appendix  
7  
8 117 1/Supplementary file 1; Appendix 2/Supplementary file 2: Form 4 Part A, Form 5; Appendix  
9  
10 118 3/Supplementary file 3). These data will be used to adjust age- and sex-stratified measures of disease  
11  
12 119 occurrence like incidences of infectious pathogens in the proportion of a study population not  
13  
14 120 captured by the SETA surveillance program. Data documented for various signs and symptoms or a  
15  
16 121 combination of these will be used for a gradual classification of healthcare utilization based on disease  
17  
18 122 severity.  
19

123

21 124 The HPAfrica study will, moreover, collect data on healthcare-associated factors such as travel  
22  
23 125 modalities, possession of a health insurance, cultural/ethnographic factors, immunization status  
24  
25 126 among children,[18, 19] and the frequency of occurrence and individual perception of selected  
26  
27 127 diseases (Appendix 2/Supplementary file 2: Form 4 Part B; Appendix 3/Supplementary file 3:Form 4  
28  
29 128 Part B). Demographic data (Appendix 2/ Supplementary file 2: Form 3 Part A; Appendix  
30  
31 129 3/Supplementary file 3, Form 3 Part A) will be used for age- and sex-stratification of the population  
32  
33 130 surveyed, which is required to compute adjustment factors for measures of disease occurrence. Socio-  
34  
35 131 economic data (Appendix 2/ Supplementary file 2: Form 3 Part B; Appendix 3/ Supplementary file 3:  
36  
37 132 Form 3 Part B) will be utilized to calculate wealth indices for descriptive and analytical approaches.  
38  
39 133 Information on hygiene and sanitation facilities (Appendix 2/ Supplementary file 2: Form 3 Part C;  
40  
41 134 Appendix 3/Supplementary file 3: Form 3 Part C) may provide a better understanding of the  
42  
43 135 occurrence and frequency of pathogens identified among study populations.  
44

136

## 137 **Methods**

### 138 **Study sites**

51 139 The boundaries of each site will be defined using pre-existing information set by statistical authorities  
52  
53 140 or ministries of health (Table 1) coupled with open-source high-resolution geospatial data. A  
54  
55 141 retrospective review of records of SETA recruitment healthcare facilities from the past two years will

1  
2  
3  
4 142 support the re-defining of site limits. It is expected that this review will reveal the residences or at  
5  
6 143 least the broader administrative residential areas such as communities, districts or villages of patients  
7  
8 144 who sought healthcare for any reason. Maps and satellite imagery may be used to better visualize  
9  
10 145 patients' residences and the overall boundaries, including the geographically- or administratively-  
11  
12 146 defined subareas, census enumeration areas or strata, of each site. Where boundaries cannot be clearly  
13  
14 147 defined, additional factors such as the distance to a recruitment healthcare facility may be considered.  
15  
16  
17  
18  
19  
20  
21  
22  
23  
24  
25  
26  
27  
28  
29  
30  
31  
32  
33  
34  
35  
36  
37  
38  
39  
40  
41  
42  
43  
44  
45  
46  
47  
48  
49  
50  
51  
52  
53  
54  
55  
56  
57  
58  
59  
60

For peer review only

148 **Table 1: Background data of participating study sites of target countries**

| Country      | Study site                               | Setting*    | Approximate total site population (year) | Approximate age-stratified site population |                  |                  |                  | Approximate sex-stratified site population |                     |
|--------------|------------------------------------------|-------------|------------------------------------------|--------------------------------------------|------------------|------------------|------------------|--------------------------------------------|---------------------|
|              |                                          |             |                                          | <2y                                        | ≥2y to <5y       | ≥5y to <15y      | ≥15y             | Male                                       | Female              |
| Burkina Faso | Nioko II <sup>1</sup>                    | Urban       | 19,251 (2017)                            | 2,394                                      | 1,977            | 4,657            | 10,223           | 9,321                                      | 9,930               |
|              | Polesgo <sup>1</sup>                     | Rural       | 7,897 (2017)                             | 934                                        | 893              | 1,808            | 4,262            | 3,856                                      | 4,041               |
|              | Ouagadougou <sup>1</sup>                 | Urban       | 2,532,311 (2015)                         | 421,429                                    | 693,723          | 1,417,159        | 1,271,302        | 1,261,009                                  |                     |
| DRC          | Kisantu <sup>2</sup>                     | Urban       | 291,252 (2017)                           | 48,043                                     |                  | 243,209          |                  | 91,598 <sup>#</sup>                        | 99,231 <sup>#</sup> |
| Ethiopia     | Wolayita Zone <sup>3</sup>               | Urban/Rural | 1,968,735 (2017)                         | 100,800                                    | 206,520          | 635,015          | 1,026,300        | 964,577                                    | 1,004,058           |
|              | Wolayita Sodo <sup>3</sup>               | Urban/Rural | 120,288 (2017)                           | 6,161                                      | 12,617           | 38,807           | 62,703           | 59,898                                     | 60,390              |
|              | East Shewa & Arsi Zone <sup>3</sup>      | Urban/Rural | 3,249,722 (2017)                         | 104,408                                    | 422,939          | 1,016,917        | 1,705,458        | 1,671,699                                  | 1,578,023           |
|              | Adama Wenji <sup>3</sup>                 | Urban/Rural | 53,540 (2017)                            | 3,330                                      | 7,204            | 17,028           | 25,978           | 27,199                                     | 26,341              |
| Ghana        | Asante Akim North & Central <sup>4</sup> | Urban/Rural | 140,694 (2010)                           | 11,606                                     | 8,363            | 35,618           | 85,107           | 67,673                                     | 73,021              |
|              | Kumasi (Metropolis) <sup>4,5</sup>       | Urban       | 1,730,249 (2010)                         | 52,516                                     | 178,575          | 421,834          | 1,077,324        | 826,479                                    | 903,770             |
| Madagascar   | Antananarivo <sup>6</sup> (Renivohitra)  | Urban       | 1,247,025 (2009)                         | N/A <sup>§</sup>                           | N/A <sup>§</sup> | N/A <sup>§</sup> | N/A <sup>§</sup> | N/A <sup>§</sup>                           | N/A <sup>§</sup>    |
|              | Imerintsiatosika <sup>7</sup>            | Rural       | 44,669 (2016)                            | 3,582                                      | 4,449            | 7,610            | 29,028           | N/A <sup>§</sup>                           | N/A <sup>§</sup>    |
| Nigeria      | Ibadan <sup>8</sup>                      | Urban       | 1,343,147 (2006)                         | 176,110                                    |                  | 305,656          | 861,381          | 661,818                                    | 681,329             |

149 Note. Table 1 shows population data that were available at the time of the HPAfrica protocol writing; population data and boundaries of geographically and/or  
 150 administratively defined study sites may be subject to changes during the course of the study. \*The classification of sites by country is based on best local knowledge; #The  
 151 sex-stratification is based on a total population of 190,829; §Population data not available at the time of protocol writing; y= years of age.

152  
 153 Source of population data: **Burkina Faso** (<sup>1</sup><http://www.insd.bf/n/>); <sup>2</sup><http://www.indepth-network.org/member-centres/ouagadougou-hdss>); **DRC** (<sup>2</sup>Kisantu Central Health  
 154 Zone Office report, 2016); **Ethiopia** (<sup>3</sup>Health Management Information System of the Ethiopian Ministry of Health (zonal and district health offices); **Ghana** (<sup>4</sup>Ghana  
 155 Statistical Service, 2010 Population & Housing Census, Asante Akim Central Municipality; <sup>5</sup>Ghana Statistical Service, 2010 Population & Housing Census, Summary report of  
 156 final results); **Madagascar** (<sup>6</sup>Population par Fokotany selon la declaration des Chefs Fokotany: Source: Donnee de la cartographie censitaire mises-a-jour en juillet 2009 -  
 157 INSTAT/DDSS; <sup>7</sup>University of Antananarivo); **Nigeria** (<sup>8</sup>Federal Republic of Nigeria 2006 Population and Housing Census (Table DS5), National Population Commission,  
 158 Abuja, Nigeria).

159 **Sample size**

160 All available sources will be used to gather most up-to-date age- and sex-stratified population data by  
 161 study site and its administratively- or geographically-defined subareas or strata. Strata will be defined  
 162 as the smallest administrative unit as published by the census of a participating country. Households  
 163 within strata are expected to be approximately homogeneously distributed. Population data sources for  
 164 counts per stratum may include latest demographic information from census summary data or from a  
 165 Demographic Surveillance System (DSS)/Health and Demographic Surveillance System (HDSS).  
 166 Population summary figures and population growth factors, if available, may be an additional data  
 167 source. For sites with outdated or unavailable population counts, open-access sampling tools coupled  
 168 with population data sources like density-based gridded population data estimates from WorldPop  
 169 may also be used.[20-25]

170  
 171 All strata per study site will be included. A household as defined for the HPAfrica study constitutes  
 172 the primary sampling unit (PSU). The minimum number of randomly selected households to be  
 173 interviewed will be calculated using the precision-based equation (Equation-I) assuming an infinite  
 174 population and considering a design effect (DEFF),[26-28] including its accompanying assumptions:

176 **Equation-I: Precision-based sample size calculation by study site for an infinite population [26-32]**

$$n_0 = DEFF \cdot \left[ z_{1-\frac{\alpha}{2}}^2 \cdot \frac{4 \cdot p \cdot (1-p)}{d^2} \right]$$

178 Assumptions Equation-I

|                          |                                                                                                                                                                                                                                                                                                |
|--------------------------|------------------------------------------------------------------------------------------------------------------------------------------------------------------------------------------------------------------------------------------------------------------------------------------------|
| $n_0$                    | Minimum total number of households to be interviewed in a study area assuming an infinite population                                                                                                                                                                                           |
| $DEFF$                   | Design effect; set at 1.5<br>$\leq 1.0$ =negative correlation of the outcome(s) of interest between household members; $1.0$ =no correlation of the outcome(s) of interest between household members; $\geq 1.0$ =positive correlation of the outcome(s) of interest between household members |
| $z_{1-\frac{\alpha}{2}}$ | Normal deviation corresponding to a 95% confidence interval (1.96 for alpha of 0.05)                                                                                                                                                                                                           |
| $d$                      | Precision (acceptable error); point estimation; set at 0.2                                                                                                                                                                                                                                     |
| $p$                      | Proportion of the study population expected to visit a recruitment healthcare facility for conditions associated with fever and other signs and symptoms (proportion captured); set at 0.2                                                                                                     |
| $1-p$                    | Proportion of the study population expected to not visit a recruitment healthcare facility for conditions associated with fever and other signs and symptoms (proportion not captured)                                                                                                         |

180

181 The design effect is defined as an adjustment factor for the natural clustering of health behavior as the

1  
2  
3  
4 182 main outcome of interest among household members. It accounts for greater statistical variance and,  
5  
6 183 therefore, lower precision compared to simple random sampling.[15, 30, 33, 34] For HPAfrica, the  
7  
8 184 DEFF may be set conservatively at 1.5 based on an estimate of 1.42 resulting from an average  
9  
10 185 household size of seven and an Intracluster Correlation Coefficient (ICC) of 0.07 from the TSAP  
11  
12 186 study.[15, 31, 32, 35] A proportion  $p$  of 0.2 may be assumed if no other estimates are available, or  $p$   
13  
14 187 may be based on more precise information available by site or on experiences taken from the TSAP  
15  
16 188 study (Table 2): Madagascar, Isotry:  $p = 0.01$ , Burkina Faso, Polesgo:  $p = 0.9$ . [36] Combining all  
17  
18 189 assumptions into Equation-I will result in a total minimum number ( $n_0$ ) of 92 household interviews  
19  
20 190 per site.

21  
22 191  
23  
24 192 In addition,  $n_0$  will be accounted for the age- and sex-distribution of a study population reflected by  $q$ ,  
25  
26 193 the assumed minimum proportion of stratification per age group (<5 years,  $\geq 5$  to <15 years,  $\geq 15$   
27  
28 194 years). Factor  $q$  may be arbitrarily set at 0.2 or may be based on previous experiences: Ethiopia,  
29  
30 195 Butajira:  $q = 0.09$ , Burkina Faso, Polesgo:  $q = 0.23$ . [15] Applying  $q$  to Equation-II for a binomial  
31  
32 196 distribution, including its accompanying assumptions, will result in the age-stratified minimum  
33  
34 197 number of household interviews ( $\bar{n}_0$ ) of 461 (Equation-II):

35  
36 198

37  
38 199 **Equation-II: Precision-based sample size calculation by study site for an infinite population**  
39 200 **considering age-stratification and population-weight by subarea or stratum:**  
40 201

$$202 \quad \bar{n}_0 = \left( DEFF \cdot \left[ z_{1-\frac{\alpha}{2}}^2 \cdot \frac{4 \cdot p \cdot (1-p)}{d^2} \right] \right) / q \quad \bar{n}_{ow} = \bar{n}_0 \cdot (n/N)$$

41  
42  
43 Assumptions Equation-II

|                          |                                                                                                                                                                                            |
|--------------------------|--------------------------------------------------------------------------------------------------------------------------------------------------------------------------------------------|
| $\bar{n}_0$              | Minimum total number of households to be interviewed in the study area assuming an infinite population and age-stratification                                                              |
| $\bar{n}_{ow}$           | Minimum number of households to be interviewed by subarea or stratum                                                                                                                       |
| $n/N$                    | Population size of subarea or stratum divided by the population size of the total study area                                                                                               |
| $DEFF$                   | Design effect; set at 1.5                                                                                                                                                                  |
| $z_{1-\frac{\alpha}{2}}$ | Normal deviation corresponding to a 95% confidence interval (1.96 for alpha of 0.05)                                                                                                       |
| $d$                      | Precision (acceptable error); point estimation; set at 0.2                                                                                                                                 |
| $p$                      | Proportion of the study population expected to visit a recruitment healthcare facility for conditions associated with fever and other signs and symptoms (proportion captured); set at 0.2 |
| $1-p$                    | Proportion of the study population expected to not visit a recruitment healthcare facility for conditions associated with fever and other signs and symptoms (proportion not captured)     |
| $q$                      | The minimum proportion of stratification per age group; set at 0.2                                                                                                                         |

44  
45  
46  
47  
48  
49  
50  
51  
52  
53  
54  
55 203

Health behavior will be assessed twice at the same households if possible or at alternative households in case the study population is instable due to migration and/or high birth/death rates. Additional households, assumed to be 20% on average, (Table 2) may be added to account for possible loss to follow-up between the two assessments. Eventually, population-weighted stratified sampling by the strata population proportion ( $n/N$ ) to account for unequal selection probability due to heterogeneous population distributions between strata (population-weight ( $n/N$ ) by stratum) will be applied to  $\bar{n}_0$  of 553.[37, 38]

**Table 2: Sample sizes considering infinite population, differing estimates for p, age-stratification and loss to follow-up by study site applying Equation-II:**

| Proportion (p) | Total minimum number of households without DEFF | Total minimum number of households ( $n_0$ ) with DEFF=1.5 | Total minimum number of households ( $\bar{n}_0$ ) with DEFF=1.5 and $q=0.2$ | $\bar{n}_0$ adjusted for loss to follow-up |
|----------------|-------------------------------------------------|------------------------------------------------------------|------------------------------------------------------------------------------|--------------------------------------------|
| 0.1            | 35                                              | 52                                                         | 259                                                                          | 311                                        |
| 0.2            | 62                                              | 92                                                         | 461                                                                          | 553                                        |
| 0.3            | 81                                              | 121                                                        | 605                                                                          | 726                                        |
| 0.4            | 92                                              | 138                                                        | 691                                                                          | 830                                        |
| 0.5            | 96                                              | 144                                                        | 720                                                                          | 864                                        |
| 0.6            | 92                                              | 138                                                        | 691                                                                          | 830                                        |
| 0.7            | 81                                              | 121                                                        | 605                                                                          | 726                                        |
| 0.8            | 62                                              | 92                                                         | 461                                                                          | 553                                        |
| 0.9            | 35                                              | 52                                                         | 259                                                                          | 311                                        |

#### Abbreviations

p=Proportion of the study population expected to visit a recruitment healthcare facility for conditions associated with fever and other signs and symptoms (proportion captured); set at 0.2

DEFF=Design effect; set at 1.5

$n_0$ =Total minimum number of households to be interviewed in a study area assuming an infinite population

$\bar{n}_0$ =Total minimum number of households to be interviewed in the study area assuming an infinite population and age-stratification

$q$ =Minimum proportion of stratification per age group; set at 0.2

#### Sampling with and without population sampling frame

If a comprehensive up-to-date population sampling frame or household list exists through DSS/HDSS or census [39, 40], computerized selection of households as PSUs will be performed using SAS (Statistical Analysis System, version 9.4, SAS Institute, Cary, NC) applying serial simple random sampling without replacement weighted by strata population proportion ( $n/N$ ). Selected households labeled with identifiers are visualized using DSS/HDSS or census tools. In case of refusal, absence of



1  
2  
3  
4 230 a respondent or locating of an abandoned household, interviewers are trained to visit an alternative  
5  
6 231 household closest to the right or left side of an original household. This follows the principle of  
7  
8 232 closest proximity as seen in previous research.[41-44] To limit, furthermore, chances of unequal  
9  
10 233 selection probability, thus chances of selection bias by interviewers, we pre-choose an arbitrary  
11  
12 234 number of five alternative households from the population sampling frame that require to be in closest  
13  
14 235 proximity to the original household rather than applying for instance a lottery-based or clockwise  
15  
16 236 spiral outward selection.[37, 41, 44] In addition, scoring from one (=closest) to five (=furthest) is  
17  
18 237 applied to alternative households and interviewers are instructed to strictly follow the scoring  
19  
20 238 sequence during the household selection procedure. Compliance of interviewers with the rules given  
21  
22 239 for selecting original and alternative households will be verified on a daily basis. Deviations will be  
23  
24 240 investigated and re-training provided to interviewers as required.

25  
26 241

27  
28 242 If no population sampling frame exists, we will apply a stratified spatial sampling technique weighted  
29  
30 243 by the strata population proportion ( $n/N$ ).[37] Guided by previous research conducted, random  
31  
32 244 spatial points are generated using the ArcGIS (Aeronautical Reconnaissance Coverage Geographic  
33  
34 245 Information System; Redlands, CA, USA, version 10.2) random point generation tool.[21, 23, 37, 40,  
35  
36 246 43, 45-51] The tool randomly places a number of points inside the feature of a polygon that  
37  
38 247 corresponds to an administrative subarea or stratum. X- and Y-coordinates define one point until the  
39  
40 248 calculated sample size by stratum is reached. ArcGIS-generated points are converted into an image  
41  
42 249 file of the Keyhole Markup Language (KML) or Keyhole Markup language Zipped (KMZ) format  
43  
44 250 and imported into Google Earth Pro<sup>®</sup>. A unique numerical identifier and geographic coordinates are  
45  
46 251 assigned to each point. Appendix 4/Supplementary file 4 illustrates our approach utilizing examples  
47  
48 252 from Ghana and Madagascar. Spatial points labeled with identifiers are pictured on poster-sized  
49  
50 253 printouts of (60x60 to 60x90 cm) of Google Earth Pro<sup>®</sup> satellite imagery with high resolution or  
51  
52 254 alternatively using an open-source application for offline/online automated navigation and mapping to  
53  
54 255 locate points on the ground. Global Positioning System (GPS) receivers (Garmin-eTrex; Garmin Ltd.,  
55  
56 256 Lenexa, KS, USA) allow verifying the locations. The receivers will be positioned closely to a located

1  
2  
3  
4 257 point, in a static position and an open area to assure barrier-free reading. Interviewers assess spatial  
5  
6 258 points for the presence of a household as the PSUs.[24] In case of refusal, absence of a respondent or  
7  
8 259 locating of a non-residential point, interviewers are trained to visit a pre-selected alternative spatial  
9  
10 260 point closest to the right or left side of an original point and assess it for the presence of a  
11  
12 261 household.[41-43, 52] To limit chances of unequal selection probability, we pre-select at least five  
13  
14 262 alternative spatial points in closest proximity to the original point that represent a structure of  
15  
16 263 appropriate size and rectangular or square shape from the Google Earth Pro® satellite imagery using  
17  
18 264 the in-built distance measurement tool. Same as for sites with a population sampling frame, scoring  
19  
20 265 from one to five is applied to alternative spatial points and interviewers are instructed to follow the  
21  
22 266 scoring sequence. Compliance of interviewers with the rules given for selecting original and  
23  
24 267 alternative households will be verified on a daily basis. Deviations will be investigated and re-training  
25  
26 268 provided to interviewers as required. In the event that a spatial point is placed in equidistance to two  
27  
28 269 (or more) structures, the interviewer skips the original spatial point and chooses a pre-selected  
29  
30 270 alternative spatial point following the scoring sequence. In case two (or more) original spatial points  
31  
32 271 are placed on the same structure, the interviewer assesses the structure for the presence of a household  
33  
34 272 and chooses a second (or more) pre-selected alternative spatial point following the scoring sequence.  
35  
36 273  
37  
38 274 Irrespective of the presence or absence of a population sampling frame, a single-family, single-story  
39  
40 275 household will be approached directly for study participation. However, one household only is  
41  
42 276 enrolled at a multi-family, single-story structure based on following procedures: the interviewer enters  
43  
44 277 the structure and assesses the total number of households; the first household on the right/left side  
45  
46 278 (depending on the inner construction) of the structure is approached; if the first household does not  
47  
48 279 participate, the second household on the right/left side of the same structure is approached. The  
49  
50 280 interviewer continues until one household by structure is enrolled. Similarly, one household only is  
51  
52 281 enrolled at a multi-family, multi-story structure. After assessing the total number of households  
53  
54 282 present, the interviewer approaches the first household nearest to the entrance; if the first household  
55  
56 283 does not participate, the second household closest to the entrance on the same/subsequent floor

284 (depending on the inner construction) is approached; the interviewer continues until one household by  
 285 structure is enrolled. The interviewer chooses a pre-selected alternative spatial point following the  
 286 scoring sequence in case no household can be enrolled.

287

### 288 **Frequency of data collection**

289 Residential points will be visited twice for household interviews during the SETA program to assess  
 290 seasonal influences on health behavior.[53-57] Interviews will take place in differing seasons – one at  
 291 the end of the dry season or at least one month after its beginning and one towards the end of the wet  
 292 season or at least one month after its beginning (Table 3). Currently, the HPAfrica study is ongoing in  
 293 Burkina Faso, Ghana and Madagascar and is anticipated to be continued in the remaining countries  
 294 during the upcoming months.

295

296 **Table 3: Seasonality in participating countries**

| Country      | Period of Wet Season               | Period of Dry Season         |
|--------------|------------------------------------|------------------------------|
| Burkina Faso | May/June - September/October       | October/November - April/May |
| DRC          | November – March                   | April - October              |
| Ethiopia     | June – August                      | October - May                |
| Ghana        | April – July, September – November | December - March             |
| Madagascar   | November - March/April             | April/May - October          |
| Nigeria      | May – August                       | October - April              |

297 Note. The seasonality by country is based on best local knowledge.

298

### 299 **Inclusion and exclusion criteria**

300 Household members of all ages and both sexes living in a study area at the day of the interview will  
 301 be eligible for inclusion. A household will be excluded if the designated respondent declines  
 302 participation or is unavailable after three consecutive visits. All visitors and individuals with unknown  
 303 residence or residence outside the study area will be excluded.

304

305 For the purpose of this investigation, a household is defined as a person or a group of related or  
 306 unrelated persons living in the same dwelling unit, acknowledging one adult individual as the  
 307 household head, sharing the same housekeeping arrangements, and independently procuring food and

1  
2  
3  
4 308 other essential for living.[36]  
5  
6 309

7  
8 310 The interview will exclusively be held with the respondent, who is an adult household member at the  
9  
10 311 country-specific legal age of majority. This person may be identified as decision-maker by members  
11  
12 312 of the same household and serves as a proxy for an entire household.[15] Further relevant definitions  
13  
14 313 are explained in Appendix 1/Supplementary file 1 and Appendix 3/Supplementary file 3.  
15

16 314

### 17 315 **Data collection**

18  
19 316 On-site interviewers will be trained on locating the geographic points, identification of respondents,  
20  
21 317 informed consent procedures with emphasis on voluntary participation, and the deployment of  
22  
23 318 standardized, pre-tested study forms (Appendix 2/Supplementary file 2 and Appendix  
24  
25 319 3/Supplementary file 3) prior to the initiation of HPAfrica. [58] Informed consent and study forms  
26  
27 320 will be forward-translated into the country-specific official language by two independent bilingual  
28  
29 321 translators fluent in English and native speakers of the target language who are familiar with the  
30  
31 322 concept and terminology of the forms. Both translations will be compared for discrepancies together  
32  
33 323 with the translators and a coordinator, and consensus will be sought. The synthesized forward  
34  
35 324 translation will be back-translated from the target language into English by two independent  
36  
37 325 translators blinded to the original forms. Consensus on discrepancies of translations and the original  
38  
39 326 forms will be sought together with the translators and a coordinator. Translated forms will be pilot-  
40  
41 327 tested among a convenience sample of households of the target population prior to their finalization to  
42  
43 328 assure cross-cultural comprehensibility and semantic, idiomatic, experiential and conceptual  
44  
45 329 equivalence. A translation report will be prepared.[58-60]  
46

47 330

### 48 49 331 **Data management**

50  
51 332 Management of data will depend on the mode of collection, which will be primarily electronic rather  
52  
53 333 than paper-based. Past experiences showed following disadvantages of paper-based data collection: a  
54  
55 334 high probability of errors while filling study forms, and the need of subsequent data digitalization,  
56

1  
2  
3  
4 335 which is an extra, labor- and time-intensive and error-prone step. Electronic data capturing using an  
5  
6 336 application for a mobile device like smartphone or tablet minimizes these limiting factors to the data  
7  
8 337 quality.  
9

10 338

11 339 There may be a pilot period during which both paper-based and paperless data will be collected prior  
12  
13 340 to full implementation of electronic data collection. The latter utilizes the Android application “HPA  
14  
15 341 Collect” (Google Android 5.0.1 9API 23; available at  
16  
17 342 <https://play.google.com/store/apps/details?id=anint.ivi.hpa>) and the platform “HPA Web” (CSS,  
18  
19 343 JavaScript and JSP; available at <http://hpa.ivi.int/>), which are accompanied by a variable dictionary  
20  
21 344 containing codes, meaning and properties of variables in at least English and French. Both, “HPA  
22  
23 345 Collect” and “HPA Web”, will be designed specifically for the purpose of this study. IVI’s expertise in  
24  
25 346 computer engineering allows the fundamental construction, configuration and development of  
26  
27 347 components required. Different from many open-source programs, a server installation feature enables  
28  
29 348 the storage of all original data collected on the institutional server besides extra features for deep-error  
30  
31 349 checking, logical relations between variables and forms, search functions, and analyzing and  
32  
33 350 displaying of data collected. Stable wireless internet connectivity using default browsers is required to  
34  
35 351 assure a contemporaneous, attributable, original and accurate synchronization of data between “HPA  
36  
37 352 Collect” and “HPA Web”. Access to both “HPA Collect” and “HPA Web” is password-protected.  
38  
39 353 Appendix 5/Supplementary file 5 displays the system diagram, which has the following features:  
40

41 354

#### 42 43 355 **Structure or features of “HPA Collect”**

- 44  
45 356
- 46 • **User management:** A simple user interface provides different privileges for users to enter,  
47 357 edit (except for study labels), and export or transfer data. It establishes an audit trail that  
48 records when users enter data into the server.  
49 358
  - 50 • **Data input:** Data are entered directly into the smartphone or tablet device. Entry fields  
51 359 limit possible answers to plausible ones only by offering different input methods:  
52 360
    - 53 361 ▪ Edit Text: free text
- 54  
55  
56  
57  
58  
59  
60

- 362           ▪ Radio group/Multi click button: single choice
- 363           ▪ Check box: multiple choice
- 364           ▪ Date and time picker: entering date and time
- 365           ▪ Spinner: drop-down button

366 Additional features allow the surveyor to save time by transferring data collected at an  
367 earlier stage to data fields required at a later stage of the interview by performing  
368 plausibility checks for diverse data input fields, and by easily recognizing skip patterns.  
369 Error checks, missing data notifications, code errors, and logical errors are also included.

- 370 • **Data view:** Raw, originally entered data can be seen in the same, human- and machine-  
371 readable format, namely the JSON format, as they will be transferred to a database server  
372 (Windows, MySQL). Additional functions like “clear” to clear all records, “reset” to  
373 return back to the main data view page, and “search” to search for a study label are  
374 available.
- 375 • **Export:** All entered data will be sent to the IVI server through wireless internet  
376 connection. Each form record having a unique study label of the household enrolled is  
377 transformed into a SQL insertion query and inserted onto the server only if there is no  
378 duplicated study label found. Insertion of data will be ignored in case of duplicated study  
379 labels.
- 380 • **Export to local:** All data entered will be backed-up threefold on a public storage folder  
381 of the mobile device as JSON and txt formats. Txt files contain data of each individual  
382 form. One version of JSON files contain data by each individual form and a second  
383 version of JSON files contain all data of a household enrolled. Data in the JSON format  
384 can be extracted by USB or wireless internet connection.
- 385 • **Report:** This feature allows a user to report any query to the leading “HPA Collect”  
386 administrator at IVI by e-mail or a third-party application.
- 387 • **Settings:** The ability to switch the system language between English and French is  
388 provided.

- 1  
2  
3  
4 389           • **About:** The currently installed version of “HPA Collect” is displayed.  
5  
6 390

7  
8 391           **Structure or features of “HPA Web”**

- 9  
10 392           • **Home:** An introduction to the platform is given and a tutorial in French and English will  
11               be accessible.  
12 393  
13  
14 394           • **Form View:** The study forms are displayed separately showing every question and the  
15               corresponding input data as defined variables.  
16 395  
17  
18 396           • **Form Edit:** This feature allows the correction of the uploaded data. It is only accessible  
19               to data managers in each participating country and at IVI.  
20 397  
21  
22 398           • **Search:** Specific study labels given to each study form can be filtered.  
23  
24 399           • **Variable dictionary:** The variable dictionary can be downloaded.  
25  
26 400           • **Export:** Data can be converted from the server into a transferrable excel file.  
27  
28 401           • **Contact Us:** Quick and easy correspondence between users and the data manager at IVI  
29               is given.  
30 402  
31  
32 403

33  
34 404   Data will be reviewed by key study personnel on a day-to-day basis and checked for consistency and  
35   405   accuracy prior to data analysis. The quality of data may be checked by selecting a subset of 5% for  
36   406   validation against the original, paper-based data if possible.[58] Names of household members will  
37   407   not be linked to study forms of HPAfrica and will not be recorded in the database in order to ensure  
38   408   confidentiality. Access to the database will be restricted to authorized study personnel only and data  
39   409   will be kept in a locked, protected location. Periodic interim backup files and at least three final  
40   410   backup files of the database stored in a secure, locked place will avoid loss of data and ensure data  
41   411   safety. All data will be stored for a minimum of five years.  
42  
43  
44  
45  
46  
47  
48  
49

50 412  
51  
52 413           **Data analysis**

53  
54 414   Combined sampling weights will be computed to adjust for possible differences in selection  
55   415   probabilities and to increase the accuracy of study estimates.[22, 61] Weights are generated in a multi-

1  
2  
3  
4 416 level approach to consider selection probabilities of e.g. households, inverse weights within  
5  
6 417 households (i.e., multi-family single-story structure, multi-family multi-story structure) and inverse  
7  
8 418 weights within household members participating in the HPAfrica study.[21, 43] Open-source tools,  
9  
10 419 census data and HPAfrica-generated data such as the population size, the number of households or  
11  
12 420 structures, the number of households within multi-family/multi-story structures and the household  
13  
14 421 size by stratum will be used to compute sampling weights.[62, 63]

15 422  
16  
17 423 Descriptive analyses such as absolute and relative frequencies, medians or arithmetic means will be  
18  
19 424 conducted to construct a contemporary baseline population description. Basic analyses will include  
20  
21 425 the calculation of age- and sex-stratified proportions of *generic* and *actual* health behavior, including  
22  
23 426 healthcare utilization, for various signs and symptoms or combinations of signs and symptoms. These  
24  
25 427 analyses will allow for a gradual classification based on disease severity, including 95% confidence  
26  
27 428 interval. Health behavior will be adjusted for actual clustering among household members. Most up-  
28  
29 429 to-date stratified population data by site and demographic data derived from HPAfrica will be used to  
30  
31 430 generate the proportions for the adjustment of incidence calculations.

32  
33 431  
34  
35 432 Socio-economic information collected will be used to construct wealth indices of studied populations  
36  
37 433 by applying factor analyses based on the principal component method. In addition, bi- and  
38  
39 434 multivariate regression analyses will be performed to identify potential confounding factors or effect  
40  
41 435 modification using factor scores.

42  
43 436  
44

45 437 Bi- and multivariate regression analyses will be carried out using factor scores for the assessment  
46  
47 438 of the following variables:

- 48  
49 439
- 50 • Socioeconomic data such as education, occupation,[64] health insurance, housing, and  
51 household assets
  - 52 • Hygiene and sanitation such as toilet access, water sources, food handling, waste disposal,  
53 and animal contacts
- 54  
55 442



- 443 • Health behavior: *actual* (age- and sex-stratified, severity, frequency), *generic* (age- and
- 444 sex-stratified, severity, rating by choice)
- 445 • Travel modalities to health facilities, age-stratified
- 446 • Seasonality related to hygiene & sanitation, health behavior, travel modalities
- 447 • Cultural/religious/ethnographic factors, age-stratified
- 448 • Vaccination status among children [18, 19]
- 449 • Knowledge and perception of common diseases

#### 451 **Ethical considerations**

452 All study participants are required to provide written informed consent. There are no direct benefits  
453 for enrolled households and their members. Indirect benefits for the general population at sites will be  
454 the updated information on the burden of communicable diseases, including factors influencing  
455 disease transmission and infection. The HPAfrica study generates evidence to support decision-  
456 makers on the introduction of appropriate measures for disease prevention and control.

458 This protocol was first approved by the Institutional Review Board of the International Vaccine  
459 Institute in October 2016 and undergoes annual review and renewal also by Ethics Committees of  
460 collaborating institutions (Ethics References are listed in Appendix1/Supplementary file1).

462 During and after the HPAfrica study, all data of enrolled subjects will be kept in strict confidence and  
463 will not be disclosed to a third party by any member of the research team. Password protection of  
464 devices and the database is used for strict confidence. All paper-based data (consent forms) will be  
465 kept in a secure, locked location. Confidential information stored on computers and paper-based data  
466 sources will only be made available to co-investigators and IVI staff directly involved in study  
467 activities of HPAfrica.

#### 469 **Patient and Public Involvement**

1  
2  
3  
4 470 No patients but household members in selected study sites will be involved. They did not participate  
5  
6 471 in the development of the research question, outcome measures and the study design. However, we  
7  
8 472 attempt to balance well between answering our study objectives and benefiting the general population  
9  
10 473 at the sites by disseminating information on the disease burden and factors influencing disease  
11  
12 474 transmission and infection derived from our study. Household members will contribute to the study  
13  
14 475 conduct by direct participating in the gathering of data. They will not be involved in recruitment  
15  
16 476 procedures. The households selected for participation will be identified purely by chance due to the  
17  
18 477 random sampling applied. Study findings will be disseminated to study populations directly through  
19  
20 478 collaborating institutions and indirectly through publications in peer-reviewed journals.  
21  
22 479

#### 23 480 **Dissemination**

24  
25 481 We plan to disseminate the study findings by reporting descriptive as well as analytic and stratified  
26  
27 482 data through publications in peer-reviewed journals and collaborating institutions.  
28  
29 483

#### 30 31 484 **Authors' contributions**

32  
33 485 GDP, JKP and UP conceptualized the initial study concept of the HPAfrica study. HWS and GHJ  
34  
35 486 developed the tools “HPA Collect” and “HPA Web” for electronic data collection with primary  
36  
37 487 support of UP and AH. IO and JA supported the development and finalizing of the data collection  
38  
39 488 tools “HPA Collect” and “HPA Web”. MR and RR supported the development and finalization of the  
40  
41 489 HPAfrica study forms. The appendices were conceptualized by GDP, JKP, YC, JI, TT, AH and UP.  
42  
43 490 IO, JA, RB, LMCE, JI, HJJ, SL, OLM, WMW, ODM, INO, EOD, SP, OP, HJS, ABS, MT, TT, MR  
44  
45 491 and RR supported the further development of the initial study protocol and appendices. FM, YC and  
46  
47 492 CGM participated in the finalization of the study protocol, including appendices. AH wrote the first  
48  
49 493 draft of the manuscript. GDP, HWS, IO, JA, RB, LMCE, MH, JI, GHJ, HJJ, SL, OLM, WMW, ODM,  
50  
51 494 INO, EOD, JKP, SP, OP, HJS, ABS, MT, TT, YC, MR, RR, CGM and FM critically reviewed and  
52  
53 495 revised the manuscript draft. GDP, AH, HWS, IO, JA, RB, LMCE, MH, JI, GHJ, HJJ, SL, OLM,  
54  
55  
56  
57  
58  
59  
60

496 WMW, ODM, INO, EOD, JKP, SP, OP, HJS, ABS, MT, TT, YC, MR, RR, CGM, FM and UP agreed  
497 and approved the final manuscript as submitted.

498

#### 499 **Acknowledgement**

500 We thank David Kauderer for the support and advice in computer engineering, Dr. Paul M. Tshiminyi  
501 for the support in proofreading French study materials, and Soo Young Kwon and Ji Hyun Han for  
502 administrative support. We are grateful to community leaders and site representatives for their  
503 assistance and facilitation in properly approaching household members for our study.

504

#### 505 **Funding statement**

506 This study was supported by the Bill & Melinda Gates Foundation (OPP1127988). The funders had  
507 no role in study design, data collection, data analysis, data interpretation, or writing of the report; the  
508 conclusions and findings presented are those of the authors and do not necessarily reflect positions or  
509 policies of the Bill & Melinda Gates Foundation or the International Vaccine Institute (IVI). The IVI  
510 acknowledges its donors, including the Republic of Korea and the Swedish International Development  
511 Cooperation Agency (Sida).

512

#### 513 **Competing interests**

514 The authors declare that they have no competing interests.

515

#### 516 **Abbreviations**

517 JSON: JavaScript Objective Notation; CSS: Cascading Style Sheets; JSP: Java Server Page; SQL:  
518 Structured Query Language

519

#### 520 **Appendices**

521 **Appendix1** (Supplementary file 1)

522 Ethic References

|    |     |                                                                                           |
|----|-----|-------------------------------------------------------------------------------------------|
| 1  |     |                                                                                           |
| 2  |     |                                                                                           |
| 3  |     |                                                                                           |
| 4  | 523 | Definitions/Terminology (English)                                                         |
| 5  |     |                                                                                           |
| 6  | 524 | STROBE Statement—Checklist of items that should be included in reports of cross-sectional |
| 7  |     |                                                                                           |
| 8  | 525 | studies                                                                                   |
| 9  |     |                                                                                           |
| 10 | 526 | <b>Appendix 2</b> (Supplementary file 2)                                                  |
| 11 |     |                                                                                           |
| 12 | 527 | Study Forms (English)                                                                     |
| 13 |     |                                                                                           |
| 14 | 528 | Form 1: Record of household visits                                                        |
| 15 |     |                                                                                           |
| 16 | 529 | Form 2: Consent Form                                                                      |
| 17 |     |                                                                                           |
| 18 | 530 | Form 3: General household information                                                     |
| 19 |     |                                                                                           |
| 20 | 531 | Part A: Demographic data/General household information                                    |
| 21 |     |                                                                                           |
| 22 | 532 | Part B: Socio-economic data                                                               |
| 23 |     |                                                                                           |
| 24 | 533 | Part C: Hygiene and sanitation                                                            |
| 25 |     |                                                                                           |
| 26 | 534 | Form 4: Assessment of age- and sex-stratified <i>generic</i> healthcare utilization       |
| 27 |     |                                                                                           |
| 28 | 535 | Part A: Assessment of <i>generic</i> healthcare utilization                               |
| 29 |     |                                                                                           |
| 30 | 536 | Part B: Healthcare-associated factors/Vaccination/Disease perception                      |
| 31 |     |                                                                                           |
| 32 | 537 | Form 5: Assessment of age- and sex-stratified <i>actual</i> healthcare utilization        |
| 33 |     |                                                                                           |
| 34 | 538 | <b>Appendix 3</b> (Supplementary file 3)                                                  |
| 35 |     |                                                                                           |
| 36 | 539 | Protocol, Definitions/Terminology and Study Forms (French)                                |
| 37 |     |                                                                                           |
| 38 | 540 | <b>Appendix 4</b> (Supplementary file 4)                                                  |
| 39 |     |                                                                                           |
| 40 | 541 | Geospatial random selection (examples of Ghana and Madagascar)                            |
| 41 |     |                                                                                           |
| 42 | 542 | <b>Appendix 5</b> (Supplementary file 5)                                                  |
| 43 |     |                                                                                           |
| 44 | 543 | System diagram of the data collection and data management: the Android application “HPA   |
| 45 |     |                                                                                           |
| 46 | 544 | Collect” and the platform “HPA Web”.                                                      |
| 47 |     |                                                                                           |
| 48 | 545 |                                                                                           |

## 546 **References**

- 547 1. Bibigo, G., Audi, A., Aura, B., et al., Health-seeking patterns among participants of population-  
548 based morbidity surveillance in rural western Kenya: implications for calculating disease rates. *Int*  
549 *J Infect Dis*, 2010. 14(11): p. e967-73.

- 1  
2  
3  
4 550 2. Jordan, H.T., Prapasiri, P., Areerat, P., et al., A comparison of population-based pneumonia  
5  
6 551 surveillance and health-seeking behavior in two provinces in rural Thailand. *Int J Infect Dis*, 2009.  
7  
8 552 13(3): p. 355-61.
- 9  
10 553 3. Saeed, B.I., Xicang, Z., Yawson, A.E., et al., Impact of socioeconomic status and medical  
11  
12 554 conditions on health and healthcare utilization among aging Ghanaians. *BMC Public Health*, 2015.  
13  
14 555 15: p. 276.
- 15  
16 556 4. Thoa, N.T., Thanh, N.X., Chuc, N.T., et al., The impact of economic growth on health care  
17  
18 557 utilization: a longitudinal study in rural Vietnam. *Int J Equity Health*, 2013. 12: p. 19.
- 19  
20 558 5. Okafor, I.P., Sekoni, A.O., Ezeiru, S.S., et al., Orthodox versus unorthodox care: A qualitative  
21  
22 559 study on where rural women seek healthcare during pregnancy and childbirth in Southwest,  
23  
24 560 Nigeria. *Malawi Med J*, 2014. 26(2): p. 45-9.
- 25  
26 561 6. Farag, T.H., Kotloff, K.L., Levine, M.M., et al., Seeking care for pediatric diarrheal illness from  
27  
28 562 traditional healers in Bamako, Mali. *Am J Trop Med Hyg*, 2013. 89(1 Suppl): p. 21-8.
- 29  
30 563 7. Akullian, A., Ng'eno, E., Matheson, A.L., et al., Environmental Transmission of Typhoid Fever in  
31  
32 564 an Urban Slum. *PLoS Negl Trop Dis*, 2015. 9(12): p. e0004212.
- 33  
34 565 8. Steele, A.D., Hay Burgess, D.C., Diaz, Z., et al., Challenges and Opportunities for Typhoid Fever  
35  
36 566 Control: A Call for Coordinated Action. *Clin Infect Dis*, 2016. 62 Suppl 1: p. S4-8.
- 37  
38 567 9. Tran, H.H., Bjune, G., Nguyen, B.M., et al., Risk factors associated with typhoid fever in Son La  
39  
40 568 province, northern Vietnam. *Trans R Soc Trop Med Hyg*, 2005. 99(11): p. 819-26.
- 41  
42 569 10. Rweyemamu, M., Kambarage, D., Karimuribo, E., et al., Development of a One Health National  
43  
44 570 Capacity in Africa : the Southern African Centre for Infectious Disease Surveillance (SACIDS)  
45  
46 571 One Health Virtual Centre Model. *Curr Top Microbiol Immunol*, 2013. 366: p. 73-91.
- 47  
48 572 11. Slayton, R.B., Date, K.A., Mintz, E.D., Vaccination for typhoid fever in sub-Saharan Africa. *Hum*  
49  
50 573 *Vaccin Immunother*, 2013. 9(4): p. 903-6.
- 51  
52 574 12. Sharma, P.K., Ramakrishnan, R., Hutin, Y., et al., Risk factors for typhoid in Darjeeling, West  
53  
54 575 Bengal, India: evidence for practical action. *Trop Med Int Health*, 2009. 14(6): p. 696-702.

- 1  
2  
3  
4 576 13. Eguale, T., Gebreyes, W.A., Asrat, D., et al., Non-typhoidal Salmonella serotypes, antimicrobial  
5 577 resistance and co-infection with parasites among patients with diarrhea and other gastrointestinal  
6 578 complaints in Addis Ababa, Ethiopia. *BMC Infect Dis*, 2015. 15: p. 497.
- 9 579 14. Paudyal, N., Anihouvi, V., Hounhouigan, J., et al., Prevalence of foodborne pathogens in food  
11 580 from selected African countries - A meta-analysis. *Int J Food Microbiol*, 2017. 249: p. 35-43.
- 13 581 15. Panzner, U., Pak, G.D., Aaby, P., et al., Utilization of Healthcare in the Typhoid Fever  
15 582 Surveillance in Africa Program. *Clin Infect Dis*, 2016. 62 Suppl 1: p. S56-68.
- 17 583 16. Von Kalckreuth, V., Konings, F., Aaby, P., et al., The Typhoid Fever Surveillance in Africa  
19 584 Program (TSAP): Clinical, Diagnostic, and Epidemiological Methodologies. *Clin Infect Dis*, 2016.  
21 585 62 Suppl 1: p. S9-S16.
- 23 586 17. Park, S.E., Toy, T., Cruz Espinosa, L. M., et al., The Severe Typhoid in Africa Program: a  
25 587 multicentre population-based surveillance program with a nested case-control and cohort study  
27 588 (under submission).
- 29 589 18. WHO. WHO vaccine-preventable diseases: monitoring system. 2017 global summary 2017  
31 590 [accessed 05 December 2017]; Available from:  
33 591 [http://apps.who.int/immunization\\_monitoring/globalsummary/schedules/](http://apps.who.int/immunization_monitoring/globalsummary/schedules/).
- 35 592 19. WHO, WHO recommendations for routine immunization - summary tables, 2017 [accessed 08  
37 593 December 2017] ; Available from :  
39 594 [http://www.who.int/immunization/policy/immunization\\_tables/en/](http://www.who.int/immunization/policy/immunization_tables/en/).
- 41 595 20. GridSample. [accessed 05 June 2018]; Available from: [www.gridsample.org](http://www.gridsample.org).
- 43 596 21. Thomson, D.R., Hadley, M.B., Greenough, P.G., et al., Modelling strategic interventions in a  
45 597 population with a total fertility rate of 8.3: a cross-sectional study of Idjwi Island, DRC. *BMC*  
47 598 *Public Health*, 2012. 12: p. 959.
- 49 599 22. Thomson, D.R., Stevens, F.R., Ruktanonchai, N.W., et al., GridSample: an R package to generate  
51 600 household survey primary sampling units (PSUs) from gridded population data. *Int J Health*  
53 601 *Geogr*, 2017. 16(1): p. 25.

- 1  
2  
3  
4 602 23. Galway, L.P., Bell, N., SAE, A.S., et al., A two-stage cluster sampling method using gridded  
5 603 population data, a GIS, and Google Earth(TM) imagery in a population-based mortality survey in  
6 604 Iraq. *Int J Health Geogr*, 2012. 11: p. 12.
- 7  
8  
9 605 24. Muñoz, J., Langeraar, W., A census-independent sampling strategy for a household survey in  
10 606 Myanmar. [04 June 2018]; Available from: [http://winegis.com/images/census-independent-GIS-](http://winegis.com/images/census-independent-GIS-based-sampling-strategy-for-household-surveys-plan-of-action%20removed.pdf)  
11 607 [based-sampling-strategy-for-household-surveys-plan-of-action%20removed.pdf](http://winegis.com/images/census-independent-GIS-based-sampling-strategy-for-household-surveys-plan-of-action%20removed.pdf).
- 12  
13  
14 608 25. WorldPop. How would you like to access our data? [accessed 20 August 2018; Available from:  
15 609 [www.worldpop.org.uk/data/get\\_data/](http://www.worldpop.org.uk/data/get_data/).
- 16  
17  
18 610 26. Fleiss, J.L., Levin, B., Paik, M.C., Statistical Methods for Rates and Proportions. 3rd ed2003,  
19 611 New York: John. Wiley & Sons.
- 20  
21  
22 612 27. Henderson, R.H., Dacis, H., Eddins, D.L., et al., Assessment of vaccination coverage, vaccination  
23 613 scar rates, and smallpox scarring in five areas of West Africa. *Bull World Health Organ*, 1973.  
24 614 48(2): p. 183-94.
- 25  
26  
27 615 28. Henderson, R.H., Sundaresan, T., Cluster sampling to assess immunization coverage: a review of  
28 616 experience with a simplified sampling method. *Bull World Health Organ*, 1982. 60(2): p. 253-60.
- 29  
30  
31 617 29. Chakraborty, H., et al., A simulation based technique to estimate intracluster correlation for a  
32 618 binary variable. *Contemp Clin Trials*, 2009. 30(1): p. 71-80.
- 33  
34  
35 619 30. Segura-Correa, J.C., Dominquez-Diaz, D., Avalos-Ramirez, R., et al., Intraherd correlation  
36 620 coefficients and design effects for bovine viral diarrhoea, infectious bovine rhinotracheitis,  
37 621 leptospirosis and neosporosis in cow-calf system herds in North-eastern Mexico. *Prev Vet Med*,  
38 622 2010. 96(3-4): p. 272-5.
- 39  
40  
41 623 31. Katz, J. and S.L. Zeger, Estimation of design effects in cluster surveys. *Ann Epidemiol*, 1994. 4(4):  
42 624 p. 295-301.
- 43  
44  
45 625 32. van Breukelen, G.J., Candel, M.J., Calculating sample sizes for cluster randomized trials: we can  
46 626 keep it simple and efficient! *J Clin Epidemiol*, 2012. 65(11): p. 1212-8.
- 47  
48  
49 627 33. Kaiser, R., Woodruff, B.A., Bilukha, O., et al., Using design effects from previous cluster surveys  
50 628 to guide sample size calculation in emergency settings. *Disasters*, 2006. 30(2): p. 199-211.

- 1  
2  
3  
4 629 34. Katz, J., Carey, V.J., Zeger, S.L., et al., Estimation of design effects and diarrhea clustering within  
5  
6 630 households and villages. *Am J Epidemiol*, 1993. 138(11): p. 994-1006.  
7  
8 631 35. Newcombe, R.G., Two-sided confidence intervals for the single proportion: comparison of seven  
9  
10 632 methods. *Stat Med*, 1998. 17(8): p. 857-72.  
11  
12 633 36. Panzner, U., Ali, M., Baker, S., et al., Geospatial sampling frames for household-based studies:  
13  
14 634 Lessons learned from a multi-country surveillance network in Senegal, South Africa and Sudan.  
15  
16 635 2018 (under submission).  
17  
18 636 37. Kumar, N., Spatial Sampling Design for a Demographic and Health Survey. *Population Research*  
19  
20 637 *and Policy Review*, 2007. 26(5/6): p. 581-599.  
21  
22 638 38. O'Muirheartaigh, C., Eckman, S., Smith, S., Statistical design and estimation for the national  
23  
24 639 social life, health, and aging project. *J Gerontol B Psychol Sci Soc Sci*, 2009. 64(1): 30.  
25  
26 640 39. Eckman, S., English, N., Creating Housing Unit Frames from Address Databases: Geocoding  
27  
28 641 Precision and Net Coverage Rates. *Field Methods*, 2012. 24(4), 399 - 408.  
29  
30 642 40. Himelein, K., Eckman, S., Murray, S., Sampling Nomads: A New Technique for Remote, Hard-to-  
31  
32 643 Reach, and Mobile Populations. *JOS*, 2014. 30(2), 191 - 213.  
33  
34 644 41. Siri, J.G., Lindblade, K.A., Rosen, D.H., et al., A census-weighted, spatially-stratified household  
35  
36 645 sampling strategy for urban malaria epidemiology. *Malar J*, 2008. 7: p. 39.  
37  
38 646 42. Sollom, R., Richards, A.K., Parmar, P., et al., Health and human rights in Chin State, Western  
39  
40 647 Burma: a population-based assessment using multistaged household cluster sampling. *PLoS Med*,  
41  
42 648 2011. 8(2): p. e1001007.  
43  
44 649 43. Shannon, H.S., Hutson, R., Kolbe, A., et al., Choosing a survey sample when data on the  
45  
46 650 population are limited: a method using Global Positioning Systems and aerial and satellite  
47  
48 651 photographs. *Emerg Themes Epidemiol*, 2012. 9(1): p. 5.  
49  
50 652 44. Grais, R.F., Rose, A.M., Guthmann, J.P., Don't spin the pen: two alternative methods for second-  
51  
52 653 stage sampling in urban cluster surveys. *Emerg Themes Epidemiol*, 2007. 4: p. 8.  
53  
54 654 45. Lohr, S.L., Sampling: Design and Analysis. 2nd edition ed2010, Pacific Grove, CA: Duxbury  
55  
56 655 Press.



- 1  
2  
3  
4 656 46. Lister, A.J., Scott, C.T., Use of space-filling curves to select sample locations in natural resource  
5  
6 657 monitoring studies. *Environ Monit Assess*, 2009. 149(1-4): p. 71-80.
- 7  
8 658 47. Keating, J., Macintyre, K., Mbogo, C., et al., A geographic sampling strategy for studying  
9  
10 659 relationships between human activity and malaria vectors in urban Africa. *Am J Trop Med Hyg*,  
11  
12 660 2003. 68(3): p. 357-65.
- 13  
14 661 48. Keating, J., Macintyre, K., Mbogo, C.M., et al., Characterization of potential larval habitats for  
15  
16 662 Anopheles mosquitoes in relation to urban land-use in Malindi, Kenya. *Int J Health Geogr*, 2004.  
17  
18 663 3(1): p. 9.
- 19  
20 664 49. ArcGIS. [accessed 10 October 2017]; Available from: [http://pro.arcgis.com/en/pro-app/tool-](http://pro.arcgis.com/en/pro-app/tool-reference/data-management/create-random-points.htm)  
21  
22 665 [reference/data-management/create-random-points.htm](http://pro.arcgis.com/en/pro-app/tool-reference/data-management/create-random-points.htm).
- 23  
24 666 50. Wong, W.C., Zhao, Y., Wong, N.S., et al., Prevalence and risk factors of chlamydia infection in  
25  
26 667 Hong Kong: A population-based geospatial household survey and testing. *PLoS One*, 2017. 12(2):  
27  
28 668 p. e0172561.
- 29  
30 669 51. Himelein, K., Eckman, S., Murray, S., et al., Alternatives to full listing for second stage sampling:  
31  
32 670 Methods and implications. *Statistical Journal of the IAOS*, 2017. 33(3), 701-718.
- 33  
34 671 52. Kondo, M.C., Bream, K.D., Barg, F.K., et al., A random spatial sampling method in a rural  
35  
36 672 developing nation. *BMC public health*, 2014. 14: p. 338.
- 37  
38 673 53. Kasper, M.R., Blair, P.J., Touch, S., et al., Infectious etiologies of acute febrile illness among  
39  
40 674 patients seeking health care in south-central Cambodia. *Am J Trop Med Hyg*, 2012. 86(2): p. 246-  
41  
42 675 53.
- 43  
44 676 54. Dewan, A.M., Corner, R., Hashizume, M., et al., Typhoid Fever and its association with  
45  
46 677 environmental factors in the Dhaka Metropolitan Area of Bangladesh: a spatial and time-series  
47  
48 678 approach. *PLoS Negl Trop Dis*, 2013. 7(1): p. e1998.
- 49  
50 679 55. Naeem Khan, M., Shafee, M., Hussain, K., et al., Typhoid fever in paediatric patients in Quetta,  
51  
52 680 Balochistan, Pakistan. *Pak J Med Sci*, 2013. 29(4): p. 929-32.
- 53  
54 681 56. Crump, J.A., Youssef, F.G., Luby, S.P., et al., Estimating the incidence of typhoid fever and other  
55  
56 682 febrile illnesses in developing countries. *Emerg Infect Dis*, 2003. 9(5): p. 539-44.

- 1  
2  
3  
4 683 57. Osei-Tutu, B., Anto, F., Trends of reported foodborne diseases at the Ridge Hospital, Accra,  
5  
6 684 Ghana: a retrospective review of routine data from 2009-2013. *BMC Infect Dis*, 2016. 16: p. 139.  
7  
8 685 58. Wolf, C., Joye, D., Smith, T.W., et al., The SAGE Handbook of Survey Methodology,  
9  
10 686 2016. Los Angeles, CA. Sage Publications, Ltd.  
11  
12 687 59. Koller, M., Aaronson, N.K., Blazeby, J., et al., Translation procedures for standardised quality of  
13  
14 688 life questionnaires: The European Organisation for Research and Treatment of Cancer (EORTC)  
15  
16 689 approach. *Eur J Cancer*, 2007. 43(12): p. 1810-20.  
17  
18 690 60. Acquadro, C., Conway, K., Hareendran, A., et al., Literature review of methods to translate  
19  
20 691 health-related quality of life questionnaires for use in multinational clinical trials. *Value Health*,  
21  
22 692 2008. 11(3): p. 509-21.  
23  
24 693 61. Milligan, P., Njie, A., Bennett, S., Comparison of two cluster sampling methods for health surveys  
25  
26 694 in developing countries. *Int J Epidemiol*, 2004. 33(3): p. 469-76.  
27  
28 695 62. Kamanga, A., Renn, S., Pollard, D., et al., Open-source satellite enumeration to map households:  
29  
30 696 planning and targeting indoor residual spraying for malaria. *Malar J*, 2015. 14: p. 345.  
31  
32 697 63. Elsey, H., Thomson, D.R., Lin, R.Y., et al., Addressing Inequities in Urban Health: Do Decision-  
33  
34 698 Makers Have the Data They Need? Report from the Urban Health Data Special Session at  
35  
36 699 International Conference on Urban Health Dhaka 2015. *J Urban Health*, 2016. 93(3): p. 526-37.  
37  
38 700 64. ILO), I.L.O. International Standard Classification of Occupations ISCO-08, 2012. [accessed 02  
39  
40 701 December 2017; Available from: [http://www.ilo.org/wcmsp5/groups/public/---dgreports/---  
43  
44 703 \[dcomm/---publ/documents/publication/wcms\\\_172572.pdf\]\(http://www.ilo.org/wcmsp5/groups/public/---dgreports/---dcomm/---publ/documents/publication/wcms\_172572.pdf\).](http://www.ilo.org/wcmsp5/groups/public/---dgreports/---<br/>41<br/>42 702 dcomm/---publ/documents/publication/wcms_172572.pdf)

**Appendix 1/Supplementary file 1:****Ethic References****Definitions/Terminology (English)****STROBE Statement—Checklist of items that should be included in reports of *cross-sectional studies*****Ethics References**

- IVI Institutional Review Board (IRB), No. 2016-003
- Institute of Tropical Medicine Antwerp Institutional Review Board, Belgium
- Universiteit Antwerpen, Comité voor medische Ethiek, Belgium
- Ministère de la Santé du Burkina Faso – Comité d’Ethique pour la Recherche en Santé, Burkina Faso
- Comité d’Ethique de l’Ecole de Santé Publique de l’Université de Kinshasa, Democratic Republic of Congo
- National Research Ethics Review committee (NRERC) Ministry of Science and Technology, Federal Democratic Republic of Ethiopia
- AHRI-ALERT Ethics Review Committee (AAERC), Ethiopia
- Kwame Nkrumah University of Science and Technology, School of Medical Sciences/Komfo Anokye Teaching Hospital, Committee on Human Research, Publication and Ethics, Ghana
- Ministère de la Santé du Repoblikan’l Madagaskar – Comité d’Ethique
- University of Ibadan/University College Hospital Ethics Committee, Ibadan, Nigeria

**Definitions/Terminology (English)**

| <b>A</b>                                       |                                                                                                                                                                                                                                                                                         |
|------------------------------------------------|-----------------------------------------------------------------------------------------------------------------------------------------------------------------------------------------------------------------------------------------------------------------------------------------|
| Abdominal pain/<br>Intestinal pain             | Pain (acute/short-lived or chronic/long-lived) that occurs anywhere between the chest and the groin (often referred to as the stomach region/belly).                                                                                                                                    |
| Aches/Pain                                     | A condition of having continuous/prolonged dull pain in a part of the body; the physical feeling, suffering, or discomfort caused by an illness or injury.                                                                                                                              |
| <b>B</b>                                       |                                                                                                                                                                                                                                                                                         |
| Bleeding<br>(internal/external)/<br>Blood loss | The condition of losing blood from the vascular system, either internally into the body (internal bleeding) or externally through a natural orifice or break in the skin (external bleeding); blood escaping from an injured blood vessel.                                              |
| Blood loss/<br>Bleeding                        | The condition of losing blood from the vascular system, either internally into the body (internal bleeding) or externally through a natural orifice or break in the skin (external bleeding); blood escaping from an injured blood vessel.                                              |
| Blood pressure<br>disorders                    | A high/low blood pressure or a blood pressure that shows excessive fluctuation.                                                                                                                                                                                                         |
| <b>C</b>                                       |                                                                                                                                                                                                                                                                                         |
| Chills/Shivering                               | The sensation of coldness that could be accompanied by shivering or shaking of the body and pallor of the skin.                                                                                                                                                                         |
| Cholera                                        | An infectious, sometimes fatal disease of the small intestine caused by the bacterium <i>Vibrio cholerae</i> ; it is spread via the fecal-oral route from the ingestion of contaminated water and food and causes chills, shivering, severe watery diarrhea, vomiting, and dehydration. |
| Confusion/Dizziness/<br>Unconsciousness        | The state of being bewildered or unclear in mind; an abnormal state of response to stimuli in the environment; faint, wooziness, weakness, unsteadiness or a tendency to fall; the interruption of the awareness of oneself and one's surroundings.                                     |
| Convulsion                                     | The sudden, violent, irregular movement of a limb/part of the body or of the entire body which is caused by involuntary contraction of muscles.                                                                                                                                         |
| Cough                                          | The condition of expelling air from the lungs suddenly/rapidly and with a harsh noise; often involuntarily in order to clear the lung airways of fluids/mucus/other material.                                                                                                           |
| <b>D</b>                                       |                                                                                                                                                                                                                                                                                         |

|    |                                                |                                                                                                                                                                     |
|----|------------------------------------------------|---------------------------------------------------------------------------------------------------------------------------------------------------------------------|
| 1  | Dehydration                                    | A condition of excessive loss of water/moisture from the body.                                                                                                      |
| 2  | Diarrhea                                       | A condition of passing feces from the body very frequently and in a liquid rather                                                                                   |
| 3  |                                                | than solid form.                                                                                                                                                    |
| 4  | Diphtheria                                     | A highly contagious, sometimes fatal disease caused by the bacterium                                                                                                |
| 5  |                                                | <i>Corynebacterium diphtheriae</i> . It is spread from person-to-person, through the air or                                                                         |
| 6  |                                                | contaminated objects and affects the upper respiratory tract. Common symptoms                                                                                       |
| 7  |                                                | are sore throat, swollen glands/ lymph nodes, malaise, fever/chills, a membranous                                                                                   |
| 8  |                                                | substance/thick gray material that forms in the throat/tonsils and makes it difficult to                                                                            |
| 9  |                                                | breathe/ rapid breathing ("barking cough") and swallow. A form of diphtheria that                                                                                   |
| 10 |                                                | involves the skin, eyes, or genitals is also reported and is characterized by pain,                                                                                 |
| 11 |                                                | redness, and swelling of the skin.                                                                                                                                  |
| 12 | Dizziness/Confusion/<br>Unconsciousness        | The state of being bewildered or unclear in mind; an abnormal state of response to                                                                                  |
| 13 |                                                | stimuli in the environment; faint, wooziness, weakness, unsteadiness or a tendency                                                                                  |
| 14 |                                                | to fall; the interruption of the awareness of oneself and one's surroundings.                                                                                       |
| 15 |                                                |                                                                                                                                                                     |
| 16 | <b>E</b>                                       |                                                                                                                                                                     |
| 17 | Edema/Swelling                                 | The excess collection of a watery fluid/swelling in the cavities or tissues of the body;                                                                            |
| 18 |                                                | it's commonly noticed in the hands/arms/feet/legs; volume increase of tissue.                                                                                       |
| 19 | Education - formal                             | A systematic, organized education model that is structured and administered                                                                                         |
| 20 |                                                | according to a given set of laws and norms; formal education institutions are                                                                                       |
| 21 |                                                | administratively, physically and curricularly organized and require a minimum                                                                                       |
| 22 |                                                | classroom attendance from students; it involves intermediate and final assessments                                                                                  |
| 23 |                                                | in order to advance to the next learning stage; it confers degrees and diplomas                                                                                     |
| 24 |                                                | pursuant to a quite strict set of regulations.                                                                                                                      |
| 25 | <b>F</b>                                       |                                                                                                                                                                     |
| 26 | Fatigue/Malaise/<br>Weakness                   | The state of feeling tired, exhausted, or weak; a general feeling of discomfort,                                                                                    |
| 27 |                                                | uneasiness, unhealthiness, or unhappiness.                                                                                                                          |
| 28 | Fever, any                                     | An abnormally high body temperature (usually above 38°C).                                                                                                           |
| 29 | Fever <3 days                                  | An abnormally high body temperature (usually above 38°C) that appears                                                                                               |
| 30 |                                                | continuously for less than 3 days.                                                                                                                                  |
| 31 | Fever >3 days                                  | An abnormally high body temperature (usually above 38°C) that lasts longer than 3                                                                                   |
| 32 |                                                | days and appears continuously.                                                                                                                                      |
| 33 | <b>G</b>                                       |                                                                                                                                                                     |
| 34 | <b>H</b>                                       |                                                                                                                                                                     |
| 35 | Headache                                       | Any kind of pain in any region of the head.                                                                                                                         |
| 36 | Healthcare - actual                            | Healthcare that is related to specific sign/symptom-associated disease onsets or                                                                                    |
| 37 |                                                | disease onset dates.                                                                                                                                                |
| 38 | Healthcare - general                           | Healthcare that is unrelated to specific sign/symptom-associated disease onsets or                                                                                  |
| 39 |                                                | disease onset dates.                                                                                                                                                |
| 40 | Healthcare facility                            | Places or institutions where healthcare is provided; including hospitals, clinics,                                                                                  |
| 41 |                                                | healthcare centers, health posts, and specialized care centers.                                                                                                     |
| 42 | <i>Haemophilus</i><br><i>influenzae</i> type B | A bacterium that causes a range of illnesses and is spread by droplets through                                                                                      |
| 43 |                                                | coughs and sneezing, and occurs primarily among children <5years of age; common                                                                                     |
| 44 |                                                | signs are fever, headache, and stiff neck up to sepsis. It can cause ear infections,                                                                                |
| 45 |                                                | cellulitis (soft tissue infection), arthritis, upper respiratory infections, pneumonia,                                                                             |
| 46 |                                                | meningitis (potential brain damage) and epiglottitis (with airway obstructions).                                                                                    |
| 47 | Heart disorders                                | Any disorder that affects or is caused by the heart; conditions that involve                                                                                        |
| 48 |                                                | narrowed/blocked blood vessels that can lead to heart attack, chest pain, or stroke;                                                                                |
| 49 |                                                | condition that may affect one's heart muscle, valves, rhythm, or blood pressure.                                                                                    |
| 50 | Hepatitis B                                    | An infectious disease caused by the hepatitis B virus (HBV) that affects the liver                                                                                  |
| 51 |                                                | (acute/chronic liver infection; may result in liver failure, cancer, or cirrhosis). The                                                                             |
| 52 |                                                | virus is spread from person-to-person through blood, semen, or other bodily fluids.                                                                                 |
| 53 |                                                | Common symptoms are fever, malaise/weakness/fatigue, loss of appetite, nausea/<br>vomiting, abdominal discomfort/pain, dark-colored urine, joint pain and jaundice. |
| 54 | Hepatitis E                                    | An infectious disease caused by the hepatitis E virus (HEV) that affects the liver                                                                                  |
| 55 |                                                | (only acute liver infection; may result in acute liver failure). The virus is spread via                                                                            |
| 56 |                                                | the fecal-oral route through the ingestion of contaminated food and water, infected                                                                                 |
| 57 |                                                |                                                                                                                                                                     |
| 58 |                                                |                                                                                                                                                                     |
| 59 |                                                |                                                                                                                                                                     |
| 60 |                                                |                                                                                                                                                                     |

|                                    |                                                                                                                                                                                                                                                                                                                                                                                                                                                                                                                                                                                                                                                                                                                                                                     |
|------------------------------------|---------------------------------------------------------------------------------------------------------------------------------------------------------------------------------------------------------------------------------------------------------------------------------------------------------------------------------------------------------------------------------------------------------------------------------------------------------------------------------------------------------------------------------------------------------------------------------------------------------------------------------------------------------------------------------------------------------------------------------------------------------------------|
|                                    | animals (zoonotically) and blood. Common symptoms are fever, malaise, loss of appetite, diarrhea, nausea, abdominal discomfort, dark-colored urine, joint pain and jaundice.                                                                                                                                                                                                                                                                                                                                                                                                                                                                                                                                                                                        |
| HIV/AIDS                           | An infectious disease caused by the human immunodeficiency virus (HIV) that affects/damages the immune system and results in the acquired immunodeficiency syndrome (AIDS), a chronic, potentially life-threatening condition; it is transmitted through infectious body fluids such as blood, semen, and other bodily fluids. Common symptoms of an acute/early infection are fever, fatigue, headache, aches/joint pain, rash, sore throat, swollen glands/lymph nodes, diarrhea, weight loss, oral yeast infection and shingles. The untreated disease progresses to AIDS; symptoms caused by the severely damaged immune system are night sweats, recurring fever, chronic diarrhea, lesions on tongue and in the mouth, fatigue, weight loss, and skin rashes. |
| Household                          | A person or a group of related or unrelated persons that live together in the same dwelling unit, that acknowledge one male or female adult as the head of the household, that share the same housekeeping arrangements, that are considered to constitute one unit, and that provide themselves with food or other essentials for living. A household may be located in a single housing unit (single-story building) or in a set of collective living quarters (multi-story building).                                                                                                                                                                                                                                                                            |
| <b>I</b>                           |                                                                                                                                                                                                                                                                                                                                                                                                                                                                                                                                                                                                                                                                                                                                                                     |
| Income/Wage                        | Money or another form of payment that someone receives periodically in exchange for providing a good or service. It is usually received from a job/occupation.                                                                                                                                                                                                                                                                                                                                                                                                                                                                                                                                                                                                      |
| Influenza                          | An infectious, highly contagious disease of the respiratory tract that is caused by flu viruses; it is spread from person-to-person via infected saliva droplets and contaminated objects. Common symptoms are fever, aches in muscles/arms/legs, chills/sweats, headache, fatigue/weakness, runny nose/nasal congestion, sneezing, sore throat and dry persistent cough.                                                                                                                                                                                                                                                                                                                                                                                           |
| Intestinal pain/<br>Abdominal pain | Pain (acute/short-lived or chronic/long-lived) that occurs anywhere between the chest and the groin (often referred to as the stomach region/belly).                                                                                                                                                                                                                                                                                                                                                                                                                                                                                                                                                                                                                |
| <b>J</b>                           |                                                                                                                                                                                                                                                                                                                                                                                                                                                                                                                                                                                                                                                                                                                                                                     |
| Jaundice                           | A condition of yellowing of the skin/whites of the eyes.                                                                                                                                                                                                                                                                                                                                                                                                                                                                                                                                                                                                                                                                                                            |
| <b>K/L</b>                         |                                                                                                                                                                                                                                                                                                                                                                                                                                                                                                                                                                                                                                                                                                                                                                     |
| <b>M</b>                           |                                                                                                                                                                                                                                                                                                                                                                                                                                                                                                                                                                                                                                                                                                                                                                     |
| Malaise/Fatigue/<br>Weakness       | The state of feeling tired, exhausted, or weak; a general feeling of discomfort, uneasiness, unhealthiness, or unhappiness.                                                                                                                                                                                                                                                                                                                                                                                                                                                                                                                                                                                                                                         |
| Malaria                            | An infectious, sometimes fatal disease caused by a parasite ( <i>Plasmodium</i> spp.) that is transmitted primarily by the bite of infected mosquitoes; infection may also spread from mother-to-child prenatally or during delivery, or through contact with contaminated blood. Common symptoms are recurrent attacks of chills, sweating, high fever, headache, vomiting and diarrhea.                                                                                                                                                                                                                                                                                                                                                                           |
| Measles                            | An infectious, sometimes fatal disease of the respiratory tract (nose/throat) that is caused by a virus that affects mainly children <5years of age; it is spread from person-to-person via infected saliva droplets and contaminated objects. Common symptoms are fever, dry cough, runny nose, inflamed eyes, sore throat, large flat spots on the skin, and white spots in the mouth and on the cheek.                                                                                                                                                                                                                                                                                                                                                           |
| Meningitis                         | A viral/bacterial/fungal, sometimes life-threatening infectious inflammation of the membranes (meninges) surrounding the brain and spinal cord; it is spread from person-to-person via infected saliva droplets and contaminated objects. Common symptoms are high fever, severe headache, nausea/vomiting, confusion, seizures, loss of appetite and thirst, fatigues, sensitivity to light, skin rash and stiff neck.                                                                                                                                                                                                                                                                                                                                             |
| Mumps                              | A viral infectious disease caused by the mumps virus that affects mainly the parotid glands that are situated below and in front of the ears; it is spread from person-to-person via infected saliva droplets and contaminated objects. Common symptoms are fever, swelling of one/both parotid glands, headache, muscle aches, weakness/fatigue, loss of appetite and pain while chewing/swallowing; a known complication may be hearing loss.                                                                                                                                                                                                                                                                                                                     |

|                                         |                                                                                                                                                                                                                                                                                                                                                                                                                                                                                                                                                                                                                                                            |
|-----------------------------------------|------------------------------------------------------------------------------------------------------------------------------------------------------------------------------------------------------------------------------------------------------------------------------------------------------------------------------------------------------------------------------------------------------------------------------------------------------------------------------------------------------------------------------------------------------------------------------------------------------------------------------------------------------------|
| <b>N</b>                                |                                                                                                                                                                                                                                                                                                                                                                                                                                                                                                                                                                                                                                                            |
| Nausea/Vomiting                         | A feeling of sickness in the stomach with an inclination to vomit; a condition of ejecting part or all of the contents of the stomach, primarily through the mouth.                                                                                                                                                                                                                                                                                                                                                                                                                                                                                        |
| Neighbor                                | A person (related or unrelated) living next door to a household; a neighbor does not live together with members of a household (next door) in the same dwelling unit, does not share the same housekeeping arrangements, food, or other living essentials with members of a household (next door), and does not constitute one unit with members of a household (next door).                                                                                                                                                                                                                                                                               |
| <b>O</b>                                |                                                                                                                                                                                                                                                                                                                                                                                                                                                                                                                                                                                                                                                            |
| Occupation                              | A job, or means of earning a wage/living; often requires the mastery of a complex set of knowledge, tasks, duties and skills acquired through formal education and/or practical experience.                                                                                                                                                                                                                                                                                                                                                                                                                                                                |
| <b>P</b>                                |                                                                                                                                                                                                                                                                                                                                                                                                                                                                                                                                                                                                                                                            |
| Pain/Aches                              | A condition of having continuous/prolonged dull pain in a part of the body; the physical feeling, suffering, or discomfort caused by an illness or injury.                                                                                                                                                                                                                                                                                                                                                                                                                                                                                                 |
| Pertussis                               | Pertussis, also known as whooping cough, is a highly contagious bacterial disease. Symptoms similar to a common cold like runny nose, fever and cough are followed by weeks of severe coughing and a high-pitched whooping sound or gasping when a diseased person breathes in; severe coughing may even be followed by vomiting, breaking of ribs, or extreme fatigue. Infected very young and old people may have little or no cough, or they may have periods of interrupted breathing during which they do not breathe at all. Pertussis is transmitted by the bacterium <i>Bordetella pertussis</i> through coughs and sneezes of an infected person. |
| Pharmacy                                | A place where medicines (prescription or nonprescription) are prepared, preserved, compounded and dispensed.                                                                                                                                                                                                                                                                                                                                                                                                                                                                                                                                               |
| Physician                               | A person skilled/trained in healing; a person educated, clinically experienced, and licensed to practice medicine.                                                                                                                                                                                                                                                                                                                                                                                                                                                                                                                                         |
| Pneumococcus                            | A bacterial infection caused by the bacterium <i>Streptococcus pneumoniae</i> ; a sometimes fatal inflammation of the lungs that often affects immunocompromised people; it is spread from person-to-person via infected saliva droplets and contaminated objects. Common symptoms are fever, chills, cough (with phlegm/pus), chest pain, difficulty in breathing/shortness of breath, fatigue, nausea/vomiting and diarrhea; rare symptoms are sepsis, pleural effusion, and empyema.                                                                                                                                                                    |
| Polio                                   | A viral, highly contagious, sometimes fatal infectious disease caused by the poliovirus; in its most severe form causes paralysis and difficulties in breathing; it is transmitted via the fecal-oral route through ingestion of contaminated water and food, and from person-to-person contact. Common symptoms are fever, sore throat, headache, vomiting, fatigue, back pain/neck pain/stiffness, muscle weakness/aches, meningitis, loss of reflexes, and loose/floppy limbs.                                                                                                                                                                          |
| <b>Q</b>                                |                                                                                                                                                                                                                                                                                                                                                                                                                                                                                                                                                                                                                                                            |
| <b>R</b>                                |                                                                                                                                                                                                                                                                                                                                                                                                                                                                                                                                                                                                                                                            |
| Rapid breathing/<br>Shortness of breath | The condition of abnormally fast breathing; a rate of >20 breaths per minute for adults, >30 breaths per minute for children and >45 breaths per minute for babies.                                                                                                                                                                                                                                                                                                                                                                                                                                                                                        |
| Respondent                              | An adult (at the country-specific legal age of majority) household member who is a decision-maker for the entire household within the study site; thus, this adult person serves as a proxy for all household members. This person may be identified by other members of the same household as the person who is primarily involved in the daily healthcare of household members.                                                                                                                                                                                                                                                                          |
| Rotavirus                               | A viral infectious disease caused by rotavirus that results predominantly in diarrhea among children <5years of age; it spreads through the fecal-oral route from person-to-person contact and contaminated objects. Common symptoms are watery diarrhea, fever, vomiting, abdominal pain and dehydration.                                                                                                                                                                                                                                                                                                                                                 |
| Rubella                                 | A contagious, viral infectious disease caused by the rubella virus; known by its distinctive red rash; it is spread from person-to-person via infected saliva droplets), from mother-to-child prenatally via blood, and contaminated objects. Common                                                                                                                                                                                                                                                                                                                                                                                                       |

|                                                   |                                                                                                                                                                                                                                                                                                                                                                                                                                                                                                                                                                                                                                                                                                                                                                                                                                                |
|---------------------------------------------------|------------------------------------------------------------------------------------------------------------------------------------------------------------------------------------------------------------------------------------------------------------------------------------------------------------------------------------------------------------------------------------------------------------------------------------------------------------------------------------------------------------------------------------------------------------------------------------------------------------------------------------------------------------------------------------------------------------------------------------------------------------------------------------------------------------------------------------------------|
|                                                   | symptoms are mild fever, headache, stuffy/runny nose, inflamed red eyes, enlarged tender lymph nodes at the base of the skull/back of the neck/behind the ears, joint pain and a fine pink rash that moves from the face to the trunk, arms and legs.                                                                                                                                                                                                                                                                                                                                                                                                                                                                                                                                                                                          |
| Runny nose                                        | The condition when the nose (nasal and adjacent tissues and blood vessels) produces extra mucus/excess drainage.                                                                                                                                                                                                                                                                                                                                                                                                                                                                                                                                                                                                                                                                                                                               |
| <b>S</b>                                          |                                                                                                                                                                                                                                                                                                                                                                                                                                                                                                                                                                                                                                                                                                                                                                                                                                                |
| Self-treatment                                    | The medication of oneself or treatment of one's own disease or condition without medical supervision or prescription.                                                                                                                                                                                                                                                                                                                                                                                                                                                                                                                                                                                                                                                                                                                          |
| Severe breathing/<br>Difficulties in<br>breathing | The condition of abnormal breathing that may be accompanied by wheezing, chest pain, chest in-drawing, stridor, swelling in the chest, or cough for instance.                                                                                                                                                                                                                                                                                                                                                                                                                                                                                                                                                                                                                                                                                  |
| Shivering/Chills                                  | The sensation of coldness that could be accompanied by shivering or shaking of the body and pallor of the skin.                                                                                                                                                                                                                                                                                                                                                                                                                                                                                                                                                                                                                                                                                                                                |
| Shortness of breath/<br>Rapid breathing           | The condition of abnormally fast and deep breathing; a rate of >20 breaths per minute for adults, >30 breaths per minute for children and >45 breaths per minute for babies.                                                                                                                                                                                                                                                                                                                                                                                                                                                                                                                                                                                                                                                                   |
| Sneezing                                          | The condition of suddenly forcing air out through nose and mouth with a usual loud noise.                                                                                                                                                                                                                                                                                                                                                                                                                                                                                                                                                                                                                                                                                                                                                      |
| Swelling/Edema                                    | A condition of an excess collection of a watery fluid/swelling in the cavities or tissues of the body; it's commonly noticed in the hands/arms/feet/legs; volume increase of tissue.                                                                                                                                                                                                                                                                                                                                                                                                                                                                                                                                                                                                                                                           |
| <b>T</b>                                          |                                                                                                                                                                                                                                                                                                                                                                                                                                                                                                                                                                                                                                                                                                                                                                                                                                                |
| Tetanus                                           | Tetanus is an infection characterized by muscle spasms which commonly begins in the jaw and progresses to the rest of the body. The spasms usually last for a few minutes only and occur frequently during 3-4 weeks of the illness but can be so severe that they may cause bone fractures or death when they affect the respiratory muscles. Tetanus may be characterized by further symptoms like fever, sweating, headache, difficulties in swallowing, high blood pressure, and an increased heart rate. The disease is caused by an infection with the bacterium <i>Clostridium tetani</i> that is found in soil, saliva, dust and manure. The bacterium enters through a skin injury (e.g. cut, puncture wound) by a contaminated object. It produces toxins that interfere with muscle contractions that result in the typical spasms. |
| Traditional healer                                | A person that aims to maintain health as well as to prevent, diagnose, and improve or treat illnesses by using a sum of knowledge, skills and practices based on theories, beliefs and experiences.                                                                                                                                                                                                                                                                                                                                                                                                                                                                                                                                                                                                                                            |
| Tuberculosis                                      | A contagious, potentially serious infectious disease caused by the bacteria <i>Mycobacterium tuberculosis</i> ; primarily affects the lungs, but can also affect the kidneys and spine/brain; it is transmitted from person-to-person via infected saliva droplets. Common symptoms of active tuberculosis are cough (with or without blood), chest pain, weight loss, fatigue, fever, night sweats, chills and loss of appetite.                                                                                                                                                                                                                                                                                                                                                                                                              |
| Typhoid fever                                     | A bacterial, potentially life-threatening infectious disease caused by <i>Salmonella typhi</i> ; it is transmitted via the fecal-oral route through contaminated food and water, or from person-to-person contact. Common symptoms are high fever, headache, abdominal pain, constipation/diarrhea, and rash. Serious complications (i.e. perforation of the gut) are reported.                                                                                                                                                                                                                                                                                                                                                                                                                                                                |
| <b>U</b>                                          |                                                                                                                                                                                                                                                                                                                                                                                                                                                                                                                                                                                                                                                                                                                                                                                                                                                |
| Unconsciousness/<br>Dizziness/Confusion           | The state of being bewildered or unclear in mind; an abnormal state of response to stimuli in the environment; faint, wooziness, weakness, unsteadiness or a tendency to fall; the interruption of the awareness of oneself and one's surroundings.                                                                                                                                                                                                                                                                                                                                                                                                                                                                                                                                                                                            |
| <b>V</b>                                          |                                                                                                                                                                                                                                                                                                                                                                                                                                                                                                                                                                                                                                                                                                                                                                                                                                                |
| Varicella                                         | A viral, highly contagious infectious disease, commonly known as chickenpox, that primarily affects children and is caused by the varicella-zoster virus; it is spread from person-to-person by contact with infected blisters or saliva droplets. Common symptoms are mild fever, headache, backache, loss of appetite, and vesicular skin eruptions/rash/red spots on the back and chest accompanied by severe itching.                                                                                                                                                                                                                                                                                                                                                                                                                      |

|                                                                                                                                                                                                                                                          |                              |                                                                                                                                                                                                                                                                                                                                                                                                                              |
|----------------------------------------------------------------------------------------------------------------------------------------------------------------------------------------------------------------------------------------------------------|------------------------------|------------------------------------------------------------------------------------------------------------------------------------------------------------------------------------------------------------------------------------------------------------------------------------------------------------------------------------------------------------------------------------------------------------------------------|
| 1<br>2<br>3<br>4<br>5<br>6                                                                                                                                                                                                                               | Visitor                      | A person (related or unrelated) who comes to a household to spend some time with household members; a visitor does not live together with household members in the same dwelling unit, does not share the same housekeeping arrangements, food, or other living essentials with household members, and does not constitute one unit with household members.                                                                  |
| 7<br>8                                                                                                                                                                                                                                                   | Vomiting/Nausea              | A feeling of sickness in the stomach with an inclination to vomit; a condition of ejecting part or all of the contents of the stomach, primarily through the mouth.                                                                                                                                                                                                                                                          |
| 9                                                                                                                                                                                                                                                        | <b>W</b>                     |                                                                                                                                                                                                                                                                                                                                                                                                                              |
| 10<br>11                                                                                                                                                                                                                                                 | Weakness/Malaise/<br>Fatigue | The state of feeling tired, exhausted, or weak; a general feeling of discomfort, uneasiness, unhealthiness, or unhappiness.                                                                                                                                                                                                                                                                                                  |
| 12                                                                                                                                                                                                                                                       | Weight loss                  | The (voluntary or involuntary) decrease in body weight.                                                                                                                                                                                                                                                                                                                                                                      |
| 13<br>14<br>15<br>16<br>17                                                                                                                                                                                                                               | Witness                      | A person who is an adult (at the country-specific legal age of majority), who is independent of the study, who cannot be unfairly influenced by study staff, who attends the informed consent process if the subject or subject's legally acceptable representative is illiterate, and who reads (literate) the informed consent form and any other written information supplied to the subject.                             |
| 18                                                                                                                                                                                                                                                       | <b>X/Y/Z</b>                 |                                                                                                                                                                                                                                                                                                                                                                                                                              |
| 19<br>20<br>21<br>22<br>23<br>24<br>25<br>26<br>27<br>28<br>29<br>30<br>31<br>32<br>33<br>34<br>35<br>36<br>37<br>38<br>39<br>40<br>41<br>42<br>43<br>44<br>45<br>46<br>47<br>48<br>49<br>50<br>51<br>52<br>53<br>54<br>55<br>56<br>57<br>58<br>59<br>60 | Yellow fever                 | An acute infectious, human pathogenic, viral disease that is marked by the sudden onset of symptoms like fever, chills, loss of appetite, nausea, muscle pain, and headache, that typically resolve within a few days or are followed by more serious symptoms such as jaundice, high fever and hemorrhage. The disease is caused by a virus of the genus Flavivirus and is transmitted by the bite of an infected mosquito. |



STROBE Statement—Checklist of items that should be included in reports of *cross-sectional studies*

|                              | Item No | Recommendation                                                                                                                                                                       |     |
|------------------------------|---------|--------------------------------------------------------------------------------------------------------------------------------------------------------------------------------------|-----|
| <b>Title and abstract</b>    | 1       | (a) Indicate the study's design with a commonly used term in the title or the abstract                                                                                               | √   |
|                              |         | (b) Provide in the abstract an informative and balanced summary of what was done and what was found                                                                                  | √   |
| <b>Introduction</b>          |         |                                                                                                                                                                                      |     |
| Background/rationale         | 2       | Explain the scientific background and rationale for the investigation being reported                                                                                                 | √   |
| Objectives                   | 3       | State specific objectives, including any prespecified hypotheses                                                                                                                     | √   |
| <b>Methods</b>               |         |                                                                                                                                                                                      |     |
| Study design                 | 4       | Present key elements of study design early in the paper                                                                                                                              | √   |
| Setting                      | 5       | Describe the setting, locations, and relevant dates, including periods of recruitment, exposure, follow-up, and data collection                                                      | √   |
| Participants                 | 6       | (a) Give the eligibility criteria, and the sources and methods of selection of participants                                                                                          | √   |
| Variables                    | 7       | Clearly define all outcomes, exposures, predictors, potential confounders, and effect modifiers. Give diagnostic criteria, if applicable                                             | √   |
| Data sources/<br>measurement | 8*      | For each variable of interest, give sources of data and details of methods of assessment (measurement). Describe comparability of assessment methods if there is more than one group | √   |
| Bias                         | 9       | Describe any efforts to address potential sources of bias                                                                                                                            | √   |
| Study size                   | 10      | Explain how the study size was arrived at                                                                                                                                            | √   |
| Quantitative variables       | 11      | Explain how quantitative variables were handled in the analyses. If applicable, describe which groupings were chosen and why                                                         | √   |
| Statistical methods          | 12      | (a) Describe all statistical methods, including those used to control for confounding                                                                                                | √   |
|                              |         | (b) Describe any methods used to examine subgroups and interactions                                                                                                                  | √   |
|                              |         | (c) Explain how missing data were addressed                                                                                                                                          | Not |

|                  |     |                                                                                                                                                                                                                       |                |
|------------------|-----|-----------------------------------------------------------------------------------------------------------------------------------------------------------------------------------------------------------------------|----------------|
|                  |     |                                                                                                                                                                                                                       | applicable     |
|                  |     | ( <i>d</i> ) If applicable, describe analytical methods taking account of sampling strategy                                                                                                                           | Not applicable |
|                  |     | ( <i>e</i> ) Describe any sensitivity analyses                                                                                                                                                                        | Not applicable |
| <b>Results</b>   |     |                                                                                                                                                                                                                       |                |
| Participants     | 13* | (a) Report numbers of individuals at each stage of study—eg numbers potentially eligible, examined for eligibility, confirmed eligible, included in the study, completing follow-up, and analysed                     | Not applicable |
|                  |     | (b) Give reasons for non-participation at each stage                                                                                                                                                                  | Not applicable |
|                  |     | (c) Consider use of a flow diagram                                                                                                                                                                                    | Not applicable |
| Descriptive data | 14* | (a) Give characteristics of study participants (eg demographic, clinical, social) and information on exposures and potential confounders                                                                              | Not applicable |
|                  |     | (b) Indicate number of participants with missing data for each variable of interest                                                                                                                                   | Not applicable |
| Outcome data     | 15* | Report numbers of outcome events or summary measures                                                                                                                                                                  | Not applicable |
| Main results     | 16  | ( <i>a</i> ) Give unadjusted estimates and, if applicable, confounder-adjusted estimates and their precision (eg, 95% confidence interval). Make clear which confounders were adjusted for and why they were included | Not applicable |
|                  |     | ( <i>b</i> ) Report category boundaries when continuous variables were categorized                                                                                                                                    | Not applicable |
|                  |     | ( <i>c</i> ) If relevant, consider translating estimates of relative risk into absolute risk for a meaningful time period                                                                                             | Not applicable |
| Other analyses   | 17  | Report other analyses done—eg analyses of subgroups and interactions, and sensitivity analyses                                                                                                                        | Not applicable |

1  
2  
3  
4  
5  
6  
7  
8  
9  
10  
11  
12  
13  
14  
15  
16  
17  
18  
19  
20  
21  
22  
23  
24  
25  
26  
27  
28  
29  
30  
31  
32  
33  
34  
35  
36  
37  
38  
39  
40  
41  
42  
43  
44  
45  
46  
47

|                          |    |                                                                                                                                                                            |                |
|--------------------------|----|----------------------------------------------------------------------------------------------------------------------------------------------------------------------------|----------------|
| <b>Discussion</b>        |    |                                                                                                                                                                            |                |
| Key results              | 18 | Summarise key results with reference to study objectives                                                                                                                   | Not applicable |
| Limitations              | 19 | Discuss limitations of the study, taking into account sources of potential bias or imprecision. Discuss both direction and magnitude of any potential bias                 | Not applicable |
| Interpretation           | 20 | Give a cautious overall interpretation of results considering objectives, limitations, multiplicity of analyses, results from similar studies, and other relevant evidence | Not applicable |
| Generalisability         | 21 | Discuss the generalisability (external validity) of the study results                                                                                                      | Not applicable |
| <b>Other information</b> |    |                                                                                                                                                                            |                |
| Funding                  | 22 | Give the source of funding and the role of the funders for the present study and, if applicable, for the original study on which the present article is based              | ✓              |

Site \_\_\_\_ Subarea \_\_\_\_ House number \_\_\_\_

Interviewer ID \_\_\_\_

**Appendix 2/Supplementary file 2: Study forms (English)****FORM 1 – RECORD OF HOUSEHOLD VISITS****Instructions to the interviewer**

- Complete "Form 1 – RECORD OF HOUSEHOLD VISITS" for every household visited.
- Complete "Home/Respondent/Completed" once all survey parts have been completed; if not all data have been collected at the initial and/or a consecutive visit (max. 3 visits), schedule a revisit.
- **Attempt 1:** complete the status of the household visit using given options; for "Not Home", "Home/Non-Respondent" and "Home/Respondent/Unavailable" schedule a revisit; for "Home/Respondent/Refusal" state the reason for refusal and visit a replacement household to the nearest on the right or left side of this household; for ~~and~~ "Non-existing/Non-residential" skip this household and visit a replacement household to the nearest on the right or left side of this household instead.
- **Attempt 2:** complete the status of the household visit using given options; for "Not Home", "Home/Non-Respondent" and "Home/Respondent/Unavailable" schedule a revisit.
- **Attempt 3:** complete the status of the household visit using given options; for "Not Home", "Home/Non-Respondent", "Home/Respondent/Unavailable" skip this household and visit a replacement household to the nearest on the right or left side of this household instead.
- "Site" and "Subarea" must be entered each as a 3-digit, "House number" as a 4-digit, and "Interviewer ID" as a 2-digit code (use lists individually prepared for each site to obtain codes); enter "Date" in the format DD/MM/YY and "Time" in the format HH:MM and circle AM or PM. "Study label" must be a combination of a 3-digit "Site" code, a 3-digit "Subarea" code and a 4-digit "House number" code; the "Interviewer ID" must be entered as a 3-digit code.

|                                |                                   |                                                                                                                                                                                                                                                                                                                                                                                                |                     |
|--------------------------------|-----------------------------------|------------------------------------------------------------------------------------------------------------------------------------------------------------------------------------------------------------------------------------------------------------------------------------------------------------------------------------------------------------------------------------------------|---------------------|
| <b>Attempt 1</b>               | Date ____/____/____<br>(DD/MM/YY) | Time ____/____<br>AM/PM                                                                                                                                                                                                                                                                                                                                                                        | Interviewer ID ____ |
| STATUS                         |                                   | Tick one                                                                                                                                                                                                                                                                                                                                                                                       |                     |
| 1=Not home                     | <input type="radio"/>             | ➔ Schedule revisit (Date/Time)                                                                                                                                                                                                                                                                                                                                                                 |                     |
| 2=Home/Non-Respondent          | <input type="radio"/>             | ➔ Schedule revisit (Date/Time)                                                                                                                                                                                                                                                                                                                                                                 |                     |
| 3=Home/Respondent/Unavailable  | <input type="radio"/>             | ➔ Schedule revisit (Date/Time)                                                                                                                                                                                                                                                                                                                                                                 |                     |
| 4=Home/Respondent/Completed    | <input type="radio"/>             |                                                                                                                                                                                                                                                                                                                                                                                                |                     |
| 5=Home/Respondent/Refusal      | <input type="radio"/>             | Record the reason(s) for refusal; tick all that applies<br><input type="radio"/> 1=No time to answer questions<br><input type="radio"/> 2=Don't want to participate/answer questions<br><input type="radio"/> 3=Other _____<br><input type="radio"/> 98=No response <input type="radio"/> 99=Don't know<br>➔ Visit a replacement household to the nearest right or left side of this household |                     |
| 6=Non-existing/Non-residential | <input type="radio"/>             | ➔ Visit a replacement household to the nearest right or left side of this household                                                                                                                                                                                                                                                                                                            |                     |
| <b>Attempt 2</b>               | Date ____/____/____<br>(DD/MM/YY) | Time ____/____<br>AM/PM                                                                                                                                                                                                                                                                                                                                                                        | Interviewer ID ____ |
| STATUS                         |                                   | Tick one                                                                                                                                                                                                                                                                                                                                                                                       |                     |
| 1=Not home                     | <input type="radio"/>             | ➔ Schedule revisit (Date/Time)                                                                                                                                                                                                                                                                                                                                                                 |                     |
| 2=Home/Non-Respondent          | <input type="radio"/>             | ➔ Schedule revisit (Date/Time)                                                                                                                                                                                                                                                                                                                                                                 |                     |
| 3=Home/Respondent/Unavailable  | <input type="radio"/>             | ➔ Schedule revisit (Date/Time)                                                                                                                                                                                                                                                                                                                                                                 |                     |

Site \_\_\_\_\_ Subarea \_\_\_\_\_ House number \_\_\_\_\_ Interviewer ID \_\_\_\_\_

|                                |                                   |                         |                                                                                                                                                                                                                                                                                                                                                                                                |
|--------------------------------|-----------------------------------|-------------------------|------------------------------------------------------------------------------------------------------------------------------------------------------------------------------------------------------------------------------------------------------------------------------------------------------------------------------------------------------------------------------------------------|
| 4=Home/Respondent/Completed    |                                   | <input type="radio"/>   |                                                                                                                                                                                                                                                                                                                                                                                                |
| 5=Home/Respondent/Refusal      |                                   | <input type="radio"/>   | Record the reason(s) for refusal; tick all that applies<br><input type="radio"/> 1=No time to answer questions<br><input type="radio"/> 2=Don't want to participate/answer questions<br><input type="radio"/> 3=Other _____<br><input type="radio"/> 98=No response <input type="radio"/> 99=Don't know<br>➔ Visit a replacement household to the nearest right or left side of this household |
| 6=Non-existing/Non-residential |                                   | <input type="radio"/>   | ➔ Visit a replacement household to the nearest right or left side of this household                                                                                                                                                                                                                                                                                                            |
| <b>Attempt 3</b>               | Date ____/____/____<br>(DD/MM/YY) | Time ____/____<br>AM/PM | Interviewer ID ____                                                                                                                                                                                                                                                                                                                                                                            |
| STATUS                         |                                   | Tick one                |                                                                                                                                                                                                                                                                                                                                                                                                |
| 1=Not home                     |                                   | <input type="radio"/>   | ➔ Visit a replacement household to the nearest right or left side of this household                                                                                                                                                                                                                                                                                                            |
| 2=Home/Non-Respondent          |                                   | <input type="radio"/>   | ➔ Visit a replacement household to the nearest right or left side of this household                                                                                                                                                                                                                                                                                                            |
| 3=Home/Respondent/Unavailable  |                                   | <input type="radio"/>   | ➔ Visit a replacement household to the nearest right or left side of this household                                                                                                                                                                                                                                                                                                            |
| 4=Home/Respondent/Completed    |                                   | <input type="radio"/>   |                                                                                                                                                                                                                                                                                                                                                                                                |
| 5=Home/Respondent/Refusal      |                                   | <input type="radio"/>   | Record the reason(s) for refusal; tick all that applies<br><input type="radio"/> 1=No time to answer questions<br><input type="radio"/> 2=Don't want to participate/answer questions<br><input type="radio"/> 3=Other _____<br><input type="radio"/> 98=No response <input type="radio"/> 99=Don't know<br>➔ Visit a replacement household to the nearest right or left side of this household |
| 6=Non-existing/Non-residential |                                   | <input type="radio"/>   | ➔ Visit a replacement household to the nearest right or left side of this household                                                                                                                                                                                                                                                                                                            |

Site \_\_\_\_ Subarea \_\_\_\_ House number \_\_\_\_

Interviewer ID \_\_\_\_

## FORM 2 – CONSENT FORM

Healthcare assessment in [add study site and -country]

### Instructions to the interviewer

- Read “Form 2 – CONSENT FORM” to the respondent/ask the respondent to carefully read through “Form 2 – CONSENT FORM” if preferred.
- The respondent as defined for this investigation is an adult (at the country-specific legal age of majority) household member and decision-maker with respect to daily healthcare/healthcare utilization for the entire household and its members; it must not be e.g. a neighbour or a visitor.
- Assure that the respondent has fully understood the purpose, procedures, risks and benefits of this study prior to obtaining the respondent’s consent to participate.
- The respondent must sign “Form 2 – CONSENT FORM”; if the respondent is unable to sign/illiterate, a thumbprint will serve in place of a signature and a study-independent literate adult witness (e.g. member of same household/neighbour) will sign “Form 2 – CONSENT FORM”.
- Collect data about all household members regardless of whether all household members are present at the time of the interview; collecting and recording data only about individuals present at the time of the interview will result in biased data.
- Complete “Form 2 – CONSENT FORM” once for every household consented/enrolled in the study.
- Explain to the respondent that it is anticipated to revisit every household during a 2-year period; the study team will obtain a new consent for participation during each visit.
- “Site” and “Subarea” must be entered each as a 3-digit, “House number” as a 4-digit, “Interviewer ID” as a 2-digit code (use lists individually prepared for each site to obtain codes), and “Date” in the format DD/MM/YYYY. “Study label” must be a combination of a 3-digit “Site” code, a 3-digit “Subarea” code and a 4-digit “House number” code; the “Interviewer ID” must be entered as a 3-digit code.

### Study principal- and co-investigators

[add names of study principal- and co-investigators and respective affiliations]

### Introduction

The International Vaccine Institute (IVI) and the [add affiliation(s) of local investigators] are working together to look into health problems and healthcare seeking behaviour in your community [add study site and -country], including the socio-economic status, hygiene and sanitation behaviour, and the vaccination status among children. We would like to better understand where you, your family and your neighbours seek healthcare in case of medical conditions associated with fever/hot body and other signs & symptoms. This information will help us to find out how common fever-related and other conditions are, provide a better picture of influencing factors involved in disease transmission and infection, and to find ways to prevent and treat illnesses in your community. You, the primary decision-maker for daily healthcare/healthcare utilization for this household and its members, are invited to participate because you live in the area where we are conducting this study. This consent form will be read by you/to you and you should take your time to make your decision to accept or decline the participation in the study. Please ask members of the study team to explain any word(s) or information that you do not understand. Further information about this study, including its potential risks, benefits and inconveniences will be explained subsequently. After the study has been fully explained to you and if you agree to participate, you will be asked to sign this consent form on behalf of all household members. If you are unable to sign the form, we will ask you to provide your thumbprint, and a study-independent adult person (member of your household/neighbour) will sign the form as a witness. We will give you a signed and dated copy of the consent form.

### Purpose

The purpose of this study is to look into health problems and utilization of healthcare in your community [add study site and -country], including the socio-economic status and hygiene and sanitation behaviour. We aim to better understand where you, your family and your neighbours seek healthcare for conditions associated with fever/hot body or other signs & symptoms. This information will help better estimate the burden of illnesses common in your community, and to identify ways to introduce measures to prevent and treat them.

Site \_\_\_\_ Subarea \_\_\_\_ House number \_\_\_\_

Interviewer ID \_\_\_\_

### Procedures

We will visit about [add number for study site and -country] households in total in [add study site and -country] and will ask the same questions to each household. Your household was chosen for this study simply by chance. If you agree to participate, we will ask you on behalf of all household members a few questions about your household such as the initials, sex and age of each member. We would like to know some information related to the education and occupation of the household head, and income, possession of household items, the housing itself as well as hygiene and sanitation in the context of personal hygiene, food preparation and handling, water sources and handling, waste disposal, handling of farm and domestic animals as well as farming of this household. We will also ask where members of your household get help if anyone is sick due to fever-related and other conditions and about factors that may influence healthcare seeking behaviour of household members (i.e. travel modalities, availability of health insurance, cultural/ethnographic factors) besides the immunization status of children of this house and the perception of some diseases. Finally, we will measure the geographic location of your house. There are no right or wrong answers. You are free to choose which questions to answer. All in all, it should take about 30-45 minutes to answer all questions. The interview may take a bit longer if there are many members in this household. Also, we will visit your household two times in different seasons (once during the dry season and once towards the end of the rainy season) during the overall study period of about two years to collect data as described in this paragraph of the consent form.

### Participation

You, the primary decision-maker for daily healthcare/healthcare utilization for this household and its members, and members of your household are free to choose to accept or decline to be part of the study. If you do not want to participate, that is ok. If you want to stop your participation at any time, that is ok, and there will be no harm to you or members of your household. So, participation in this study is voluntary, and you are free to refuse to participate in the study or you can withdraw your consent at any time without giving reasons and this will not involve any penalty.

### Risks & Benefits

There are no direct risks for participating in this study. Asking questions about your household may make you or household members feel uncomfortable. Study teams may help providing information on established community healthcare resources for participants that express distress after completing the questions. You can refuse to answer any question at any time. You may take a break or stop participating in this study at any time. There are no direct benefits for being in this study. During visits of your household, our study teams may identify members of your household that should seek healthcare for fever-associated conditions and others. Hence, they may help providing information on established healthcare resources in your community. Indirect benefits are that all information collected will provide exact information on health problems and healthcare utilization for various conditions, including vaccination for young children, the socio-economic status as well as hygiene and sanitation behaviour in your community. This will help to provide a better picture of influencing factors involved in disease transmission and infection, and to estimate the burden of common diseases as well as to find ways to prevent and treat those in your community.

### Costs & Compensation

There are no costs for participants of this study. You and anyone from your household will not be compensated for your participation.

### Confidentiality

All study records and all collected information that identify you and members of your household will be kept confidential. All paper-based files will be locked safely and computerized files will be password-protected; all data files (paper-based/computerized) will be stored for a minimum of five years; these files will be accessible to authorized few study staff only. Your name or any identifier will not be used in any publication or reports from this study. Information that we collect about you and members of your household will only be shared with authorized study members such as authorized study staff and officials from ethics committees.

Site \_\_\_\_\_ Subarea \_\_\_\_\_ House number \_\_\_\_\_

Interviewer ID \_\_\_\_\_

**Contact point for questions**

If you or members of your household have any questions, please ask them now to the study team or at any time later by contacting [add name of local principal- and/or co-investigator, respective affiliations, and phone numbers]. If you have questions as a study participant about your/your household members' rights, you can contact the [add name and contact details of the local ethics committee].

**Statement of consent**

This consent form for participating in the assessment of health behaviour and other population-based factors in [add study site and -country] has been read by me/to me carefully. The purpose, procedures, risks & benefits have been explained to me in detail. I have been allowed to ask questions at any time, and my questions have been answered to my satisfaction by the study team. I have been told whom to contact if I have questions, want to discuss problems or concerns. I have been told that I will be given a signed and dated copy of this consent form. I have been reassured that all information obtained as result of this study will be kept confidential and used only for the purpose of this study and only by participating institutions.

I, the respondent, consent hereby voluntarily to participate in this study. I will follow the directions of the study team and give them my full cooperation. I understand that I have the right to withdraw from the study at any time.

**RESPONDENT**

Name: \_\_\_\_\_  
(given name + middle name (if available) + family name)

Signature: \_\_\_\_\_  
(handwritten depiction of person's name/mark that the person writes on a document as a proof of identity)

Date \_\_\_\_/\_\_\_\_/\_\_\_\_ (DD/MM/YYYY)

Thumbprint

If the respondent is unable to sign/illiterate but agrees to participate, record the respondent's thumb print in the above box, and have an adult study-independent literate witness (e.g. member of the same household or a neighbor) sign below:

**WITNESS**

Name: \_\_\_\_\_  
(given name + middle name (if available) + family name)

Signature: \_\_\_\_\_  
(handwritten depiction of person's name/mark that the person writes on a document as a proof of identity)

Date \_\_\_\_/\_\_\_\_/\_\_\_\_ (DD/MM/YYYY)

I, the interviewer, have read/explained the study to the above named respondent (witness if respondent is illiterate) in a language that the respondent understands well. I am certain that the respondent has understood the information and he/she agrees to be asked some questions.

**INTERVIEWER**

Name: \_\_\_\_\_  
(given name + middle name (if available) + family name)

Signature: \_\_\_\_\_  
(handwritten depiction of person's name/mark that the person writes on a document as a proof of identity)

Date \_\_\_\_/\_\_\_\_/\_\_\_\_ (DD/MM/YYYY)



Site \_\_\_\_\_ Subarea \_\_\_\_\_ House number \_\_\_\_\_

Interviewer ID \_\_\_\_\_

**FORM 3: GENERAL HOUSEHOLD INFORMATION****Instructions to the interviewer**

- Complete this form only if the respondent consented to participate (see “Form 2 – CONSENT FORM”); the respondent as defined for this investigation is an adult (at the country-specific legal age of majority) household member and decision-maker with respect to daily healthcare/healthcare utilization for the entire household and its members; it must not be e.g. a neighbour or a visitor.
- Collect data about all household members regardless of whether all household members are present at the time of the interview; collecting and recording data only about individuals present at the time of the interview will result in biased data.
- A household is/household members are defined as a person or a group of related or unrelated persons that live together in the same dwelling unit, that acknowledge one male or female adult as the head of the household, that share the same housekeeping arrangements, that are considered to constitute one unit, and that provide themselves with food or other essentials for living.
- “Site” and “Subarea” must be entered each as a 3-digit, “House number” as a 4-digit, and “Interviewer ID” as a 2-digit code (use lists individually prepared for each site to obtain codes). “Study label” must be a combination of a 3-digit “Site” code, a 3-digit “Subarea” code and a 4-digit “House number” code; the “Interviewer ID” must be entered as a 3-digit code.

**FORM 3: GENERAL HOUSEHOLD INFORMATION**  
**PART A – DEMOGRAPHIC DATA/GENERAL HOUSEHOLD INFORMATION**

**HOUSE LOCATION****1 Site, subarea and house number**

*Instructions:* Site (=study site) and subarea (=smallest unit of the study site) must be recorded each as a 3-digit, and house number as a 4-digit code; use individually prepared lists to obtain the respective codes.

Site: \_\_\_\_\_ Subarea: \_\_\_\_\_ House number: \_\_\_\_\_

**2 GPS coordinates**

*Instructions:* Take GPS coordinates at the approx. center of the house. Record altitude as a 4-digit number (unit: meter), and latitude/longitude as a 7-digit number (unit: degrees, decimal minutes).

1=Original household                       2=Replacement household (right/left side of original household)

Altitude: \_\_\_\_\_

Latitude: \_\_\_\_\_° \_\_\_\_\_'                      Longitude: \_\_\_\_\_° \_\_\_\_\_'

**RESPONDENT****3 Provide the full name of the respondent.**

*Instructions:* Record given name, middle name (if available) and family name of the respondent.

\_\_\_\_\_

**4 Provide the age of the respondent.**

*Instruction:* Recorded as a 3-digit number (unit: year). \_\_\_\_\_

**5 Provide the sex of the respondent.**

1=Male                       2=Female

**6 What is the respondent's relationship to this household?**

- |                                                                  |                                                                    |
|------------------------------------------------------------------|--------------------------------------------------------------------|
| <input type="radio"/> 1=Household head                           | <input type="radio"/> 7=Spouse of household head                   |
| <input type="radio"/> 2=Son/daughter of household head           | <input type="radio"/> 8=Spouse of son/daughter of household head   |
| <input type="radio"/> 3=Brother/sister of household head         | <input type="radio"/> 9=Spouse of brother/sister of household head |
| <input type="radio"/> 4=Mother/father of household head          | <input type="radio"/> 10=Mother/father in law of household head    |
| <input type="radio"/> 5=Granddaughter/grandson of household head | <input type="radio"/> 11=Niece/nephew of household head            |
| <input type="radio"/> 6=Other, specify _____                     | <input type="radio"/> 98=No response                               |

Site \_\_\_\_\_ Subarea \_\_\_\_\_ House number \_\_\_\_\_

Interviewer ID \_\_\_\_\_

**HOUSEHOLD MEMBERS**

**7 How many household members are living in this house in total (at the day of visit)?**

*Instruction:* Recorded as a 2-digit number.

Total number of household members: \_\_\_\_\_

**8 Record age and sex of each household member.**

*Instructions:* Record the respondent's initials, age and sex at the first position/row of the table. Initials, age and sex of all other household members must be recorded subsequently. The initials of a household member consist of the first three letters of the given name and the first three letters of the family name (a potential middle name is not part of the initials). Record the age of each household member as a 3-digit number (unit: year); if a household member's age is ≤12 months, record the age as 1 year. Please complete an additional form if a household has >20 members.

| Household member identifier | Initials<br>[given name/family name] | Age<br>[year] | Sex               |
|-----------------------------|--------------------------------------|---------------|-------------------|
| 1/Respondent                | _____/____                           | _____         | O1=Male O2=Female |
| 2                           | _____/____                           | _____         | O1=Male O2=Female |
| 3                           | _____/____                           | _____         | O1=Male O2=Female |
| 4                           | _____/____                           | _____         | O1=Male O2=Female |
| 5                           | _____/____                           | _____         | O1=Male O2=Female |
| 6                           | _____/____                           | _____         | O1=Male O2=Female |
| 7                           | _____/____                           | _____         | O1=Male O2=Female |
| 8                           | _____/____                           | _____         | O1=Male O2=Female |
| 9                           | _____/____                           | _____         | O1=Male O2=Female |
| 10                          | _____/____                           | _____         | O1=Male O2=Female |
| 11                          | _____/____                           | _____         | O1=Male O2=Female |
| 12                          | _____/____                           | _____         | O1=Male O2=Female |
| 13                          | _____/____                           | _____         | O1=Male O2=Female |
| 14                          | _____/____                           | _____         | O1=Male O2=Female |
| 15                          | _____/____                           | _____         | O1=Male O2=Female |
| 16                          | _____/____                           | _____         | O1=Male O2=Female |
| 17                          | _____/____                           | _____         | O1=Male O2=Female |
| 18                          | _____/____                           | _____         | O1=Male O2=Female |
| 19                          | _____/____                           | _____         | O1=Male O2=Female |
| 20                          | _____/____                           | _____         | O1=Male O2=Female |

Site \_\_\_\_\_ Subarea \_\_\_\_\_ House number \_\_\_\_\_

Interviewer ID \_\_\_\_\_

**FORM 3: GENERAL HOUSEHOLD INFORMATION  
PART B – SOCIO-ECONOMIC DATA**

**EDUCATION**

- 1 Can the head of household read in [add the official language of the study site/country]?**  
 1=Yes                       2=No                       99=Don't know                       98=No response
- 2 Can the head of household write in [add the official language of the study site/country]?**  
 1=Yes                       2=No                       99=Don't know                       98=No response
- 3 What is the highest completed level of formal school education of the head of household?**  
 1=Primary school                       4=Higher than secondary school                       99=Don't know  
 2=Middle school                       5=NO EDUCATION                       98=No response  
 3=Secondary school                       6=Other, specify \_\_\_\_\_

**OCCUPATION/INCOME**

**4 What is the main occupation of the household head?**

*Instructions:* Record the status of the day of visit only.

- 1=Group 1: Managers  
(chief executives, senior officials, legislators; administrative and commercial managers; production and specialized services managers; hospitality, retail and other services managers)
- 2=Group 2: Professional  
(science and engineering professionals; health professionals; teaching professionals; business and administration professionals; information and communications technology professionals; legal, social and cultural professionals)
- 3=Group 3: Technicians and Associate Professionals  
(science and engineering associate professionals; health associate professionals; business and administration associate professionals; legal, social, cultural and related associate professionals; information and communications technicians)
- 4=Group 4: Clerical Support Workers  
(general and keyboard clerks; customer services clerks; numerical and material recording clerks; other clerical support workers)
- 5=Group 5: Services and Sales Workers  
(personal services workers; sales workers; personal care workers; protective services workers)
- 6=Group 6: Skilled Agricultural, Forestry, and Fishery Workers  
(market-oriented skilled agricultural workers; animal producers; market-oriented skilled forestry, fishery and hunting workers; subsistence farmers, fishers, hunters and gatherers)
- 7=Group 7: Craft and Related Trades Workers  
(building and related trades workers (excluding electricians); metal, machinery and related trades workers; handicraft and printing workers; electrical and electronics trades workers; food processing, woodworking, garment and other craft and related trades workers)
- 8=Group 8: Plant and Machine Operators, and Assemblers  
(stationary plant and machine operators; assemblers; drivers and mobile plant operators)
- 9=Group 9: Elementary Occupations  
(cleaners and helpers; agricultural, forestry and fishery labourers; labourers in mining, construction, manufacturing and transport; food preparation assistants; street and related sales and services workers; refuse workers and other elementary workers)
- 10=Group 0: Armed Forces Occupations  
(commissioned armed forces officers; non-commissioned armed forces officers; armed forces occupations, other ranks)
- 11=Other, specify \_\_\_\_\_
- 12=NO OCCUPATION                       99=Don't know                       98=No response

Site \_\_\_\_\_ Subarea \_\_\_\_\_ House number \_\_\_\_\_

Interviewer ID \_\_\_\_\_

**5 What is the average monthly income of the household head based on the occupation stated in question 4 and of other household members?***Instruction:* Tick one answer per household head/enter one code per household member if applicable/if income available.

| Head of household                  | Member 1                                   | Member 2                                                | Member 3                            |
|------------------------------------|--------------------------------------------|---------------------------------------------------------|-------------------------------------|
| Code _____                         | Code _____                                 | Code _____                                              | Code _____                          |
| [1] <100USD<br>[2] ≥100 to <150USD | [3] ≥150 to <200USD<br>[4] ≥200 to <250USD | [5] ≥250USD<br>[6] Head of household NO INCOME (see Q4) | [99] Don't know<br>[98] No response |

**6 Which and how much other/additional source(s) of monthly monetary earnings has this household?***Instruction:* Tick all that applies; more than one answer is possible.

| Other/additional sources                                                                                                                                                                                                                                                                                                                           | Overall monthly monetary earnings                                                                                                                                                                        |
|----------------------------------------------------------------------------------------------------------------------------------------------------------------------------------------------------------------------------------------------------------------------------------------------------------------------------------------------------|----------------------------------------------------------------------------------------------------------------------------------------------------------------------------------------------------------|
| <input type="radio"/> 1=Social grants<br><input type="radio"/> 2=Insurance (i.e. private, public)<br><input type="radio"/> 3=Loan (i.e. from friends, family, bank)<br><input type="radio"/> 4=Selling (i.e. livestock, crops, furniture, other goods)<br><input type="radio"/> 5=Personal savings<br><input type="radio"/> 6=Other, specify _____ | <input type="radio"/> 1=<100 USD<br><input type="radio"/> 2=≥100 to <150 USD<br><input type="radio"/> 3=≥150 to <200 USD<br><input type="radio"/> 4=≥200 to <250 USD<br><input type="radio"/> 5=≥250 USD |
| <input type="radio"/> 7=NO OTHER/ADDITIONAL SOURCES<br><input type="radio"/> 99=Don't know<br><input type="radio"/> 98=No response                                                                                                                                                                                                                 |                                                                                                                                                                                                          |

**HOUSING/DWELLING****7 Is the house owned by the members of this household?**

- 1=Yes       2=No, rented       3=No, supplied (i.e. government, employer)  
 4=No, other, specify \_\_\_\_\_       99=Don't know  
 98=No response

**8 How many room(s)/individual house structure(s) of this household are used for sleeping, living, cooking and bathing?***Instruction:* Enter one code per category only.

| Bedroom            | Living room        | Kitchen                             | Bathroom   |
|--------------------|--------------------|-------------------------------------|------------|
| Code _____         | Code _____         | Code _____                          | Code _____ |
| [1] 1-2<br>[2] 3-4 | [3] >4<br>[4] None | [99] Don't know<br>[98] No response |            |

**9 What is the construction material of the floor, the walls and the roof of room(s)/individual house structure(s) of this house?***Instruction:* Enter all codes that applies per category; more than one answer per category is possible.

| Floor                            | Walls                | Roof                                      |
|----------------------------------|----------------------|-------------------------------------------|
| Code _____                       | Code _____           | Code _____                                |
| [1] Brick<br>[2] Cement/Concrete | [3] Tiles<br>[4] Mud | [5] Wood<br>[6] Straw/Leaves              |
|                                  |                      | [7] Metal/Tin<br>[8] Other, specify _____ |
|                                  |                      | [99] Don't know<br>[98] No response       |

**10 Do members of this household have access to/utilize electricity in this household?**

- 1=Yes       2=No       99=Don't know       98=No response

**11 Which main source of light have members of this household access to/are utilizing?**

- 1=Electric light/Light bulb(s)       2=Solar light/Solar lamp(s)  
 3=Paraffin lamp(s)/Oil lamp(s)       4=Battery-powered lamp(s)  
 5=Candle(s)       6=NO SOURCE OF LIGHT  
 7=Other, specify \_\_\_\_\_       99=Don't know  
 98=No response

Site \_\_\_\_\_ Subarea \_\_\_\_\_ House number \_\_\_\_\_

Interviewer ID \_\_\_\_\_

**HOUSEHOLD ASSETS****12 Which of the following items do members of this household own?***Instructions:* Tick all that applies; more than one answer is possible; record the quantity of functional items where applicable.

|                                             |                |                            |                                            |                |                            |
|---------------------------------------------|----------------|----------------------------|--------------------------------------------|----------------|----------------------------|
| <input type="radio"/> 1=Radio               | Quantity _____ | <input type="radio"/> None | <input type="radio"/> 11=Tape/CD player    | Quantity _____ | <input type="radio"/> None |
| <input type="radio"/> 2=Television          | Quantity _____ | <input type="radio"/> None | <input type="radio"/> 12=Computer/Laptop   | Quantity _____ | <input type="radio"/> None |
| <input type="radio"/> 3=Internet connection | Quantity _____ | <input type="radio"/> None | <input type="radio"/> 13=Mobile/Cell phone | Quantity _____ | <input type="radio"/> None |
| <input type="radio"/> 4=Car                 | Quantity _____ | <input type="radio"/> None | <input type="radio"/> 14=Truck/Bus         | Quantity _____ | <input type="radio"/> None |
| <input type="radio"/> 5=Motorbike           | Quantity _____ | <input type="radio"/> None | <input type="radio"/> 15=Bicycle           | Quantity _____ | <input type="radio"/> None |
| <input type="radio"/> 6=Oxcart/Donkey       | Quantity _____ | <input type="radio"/> None | <input type="radio"/> 16=Bed               | Quantity _____ | <input type="radio"/> None |
| <input type="radio"/> 7=Mattress            | Quantity _____ | <input type="radio"/> None | <input type="radio"/> 17=Bed net           | Quantity _____ | <input type="radio"/> None |
| <input type="radio"/> 8=Table               | Quantity _____ | <input type="radio"/> None | <input type="radio"/> 18=Chair             | Quantity _____ | <input type="radio"/> None |
| <input type="radio"/> 9=Refrigerator (4°C)  | Quantity _____ | <input type="radio"/> None | <input type="radio"/> 19=Freezer (-20°C)   | Quantity _____ | <input type="radio"/> None |
| <input type="radio"/> 10=Fan                | Quantity _____ | <input type="radio"/> None | <input type="radio"/> 20=Sewing machine    | Quantity _____ | <input type="radio"/> None |

Site \_\_\_\_\_ Subarea \_\_\_\_\_ House number \_\_\_\_\_

Interviewer ID \_\_\_\_\_

### FORM 3: GENERAL HOUSEHOLD INFORMATION

#### Part C – Hygiene and sanitation

#### TOILET FACILITY

##### 1 To what type of toilet facility have members of this household usually access?

*Instruction: Inside means inside a room/individual house structure/building; outside means outside a room/individual house structure/building.*

- 1=Flush toilet/Water closet (inside)                       8=Composting toilet (outside)  
 2=Flush toilet/Water closet (outside)                       9=NO toilet facility, use a bucket  
 3=Non-flush latrine/pit latrine (inside)                       10=NO toilet facility, dig a hole  
 4=Non-flush latrine/pit latrine (outside)                       11=NO toilet facility, free range/open defecation  
 5=Ventilated Improved Pit Latrine (KVIP, inside)                       12=Other, specify \_\_\_\_\_  
 6=Ventilated Improved Pit Latrine (KVIP, outside)                       99=Don't know  
 7=Composting toilet (inside)                       98=No response

##### 2 Do members of this household usually utilize the toilet facility stated in question 1?

- 1=No, members cannot utilize the facility independently (i.e. infants, toddlers)                       6=No, bad condition (i.e. broken, not clean)  
 2=No, members cannot utilize the facility independently (i.e. disabled, long-term/chronically diseased)                       7=YES  
 3=No, members cannot utilize the facility independently (i.e. seniors)                       8=Other, specify \_\_\_\_\_  
 4=No, limited access (i.e. public, shared with other households/community)                       99=Don't know  
 5=No, too far away (i.e. public, shared with other households/community)                       98=No response

##### 3 Where is the toilet facility stated in question 1 located? With how many other people is it usually shared?

- 1=On the property of this household (private, not shared)  
 2=On the property of a neighbouring household (private, shared)  
     *Shared*     1=<10 people                       3=25-49 people                       99=Don't know  
                      2=11-24 people                       4=>50 people                       98=No response  
 3=In the community (public, shared)  
     *Shared*     1=<10 people                       3=25-49 people                       99=Don't know  
                      2=11-24 people                       4=>50 people                       98=No response  
 4=Other, specify \_\_\_\_\_                       99=Don't know                       98=No response

##### 4 How do members of this household that have/don't have access to a toilet facility usually clean their hands directly before and after urination/defecation?

*Instruction: Enter one code per category only.*

| Clean hands before urination/defecation           | Clean hands after urination/defecation                  |
|---------------------------------------------------|---------------------------------------------------------|
| Code _____                                        | Code _____                                              |
| [1] Wash hands with soap and water                | [6] Don't clean, not needed/not dirty                   |
| [2] Wash hands with water only                    | [7] Don't clean, nothing to clean hands nearby/on hands |
| [3] Rub hands clean with some leaves/straw/ grass | [8] Other, specify _____                                |
| [4] Rub hands clean with some sand                | [99] Don't know                                         |
| [5] Rub hands clean with some cloth/fabric        | [98] No response                                        |

#### KITCHEN/FOOD HANDLING

##### 5 Do members of this household have a kitchen for cooking/preparing food/meals? Where is it located?

- 1=Yes, inside kitchen/in a room/individual house structure; on the property of this household (private, not shared)  
 2=Yes, outside kitchen/outside a room/individual house structure/ open air; on the property of this

Site \_\_\_\_\_ Subarea \_\_\_\_\_ House number \_\_\_\_\_

Interviewer ID \_\_\_\_\_

household (private, not shared)

3=Yes, inside kitchen/in a room/individual house structure; on the property of a neighbouring household (private, shared)

4=Yes, outside kitchen/outside a room/individual house structure/ open air; on the property of a neighbouring household (private, shared)

5=NO KITCHEN

6=Other, specify \_\_\_\_\_  99=Don't know  98=No response

**6 What energy source do members of this household usually use for cooking/preparing food/meals?**

1=Electricity  3=Charcoal  5=Animal dung  99=Don't know  
 2=Gas/Kerosene  4=Wood/straw/leaves  6=Other, specify \_\_\_\_\_  98=No response

**7 What cooking spot do members of this household usually use for cooking/preparing food/meals?**

1=Open fire  3=Closed stove with chimney  99=Don't know  
 2=Open stove  4=Other, specify \_\_\_\_\_  98=No response

**8 Where do members of this household usually store fresh/raw food items (e.g. vegetables, lettuce, fruits, dairy products, eggs, meat and fish) and left-over/prepared food/meals?**

*Instruction:* Enter one code per category only. Inside means inside a room/individual house structure/building; outside means outside a room/individual house structure/building.

| Fresh/raw food items (i.e. vegetables, lettuce, fruits, dairy products, eggs, meat and fish)                                                                                                                                                                                                                                                                                                                                                                                                                                                                                                                                                                                                                                                                                             | Left-over/prepared food/meals |
|------------------------------------------------------------------------------------------------------------------------------------------------------------------------------------------------------------------------------------------------------------------------------------------------------------------------------------------------------------------------------------------------------------------------------------------------------------------------------------------------------------------------------------------------------------------------------------------------------------------------------------------------------------------------------------------------------------------------------------------------------------------------------------------|-------------------------------|
| Code _____                                                                                                                                                                                                                                                                                                                                                                                                                                                                                                                                                                                                                                                                                                                                                                               | Code _____                    |
| [1] At room temperature (inside, on the property of this household, private)<br>[2] At room temperature (outside, on the property of this household, private)<br>[3] At room temperature (inside, on the property of a neighboring household, private, shared)<br>[4] At room temperature (outside, on the property of a neighboring household, private, shared)<br>[5] Refrigerator (on the property of this household, private)<br>[6] Refrigerator (on the property of a neighboring household, private, shared)<br>[7] Freezer (on the property of this household, private)<br>[8] Freezer (on the property of a neighboring household, private, shared)<br>[9] Other, specify _____<br>[10] NO STORAGE <input type="radio"/> [99] Don't know <input type="radio"/> [98] No response |                               |

**9 If the answer is "Room temperature" for fresh/raw food items and/or left-over/prepared food/meals in question 8, how long do members of this household usually store them?**

*Instruction:* Enter one code per category only.

| Fresh/raw food items (i.e. vegetables, lettuce, fruits, dairy products, eggs, meat and fish)                                                                                                                                                                      | Left-over/prepared food/meals |
|-------------------------------------------------------------------------------------------------------------------------------------------------------------------------------------------------------------------------------------------------------------------|-------------------------------|
| Code _____                                                                                                                                                                                                                                                        | Code _____                    |
| [1] <1 day <input type="radio"/> [3] 3-4 days <input type="radio"/> [5] Not applicable <input type="radio"/> [99] Don't know <input type="radio"/><br>[2] 1-2 days <input type="radio"/> [4] >4 days <input type="radio"/> [98] No response <input type="radio"/> |                               |

**10 Do members of this household usually cover left-over/prepared food/meals? Do they re-heat/re-cook left-over/prepared food/meals prior to consumption?**

*Instruction:* Enter one code per category only.

| Cover left-over/prepared food/meals                                                                                                     | Re-heat/Re-cook left-over/prepared food/meals |
|-----------------------------------------------------------------------------------------------------------------------------------------|-----------------------------------------------|
| Code _____                                                                                                                              | Code _____                                    |
| [1] Yes <input type="radio"/> [2] No <input type="radio"/> [99] Don't know <input type="radio"/> [98] No response <input type="radio"/> |                                               |

Site \_\_\_\_\_ Subarea \_\_\_\_\_ House number \_\_\_\_\_ Interviewer ID \_\_\_\_\_

**11 Which member(s) of this household usually cook(s)/prepare(s) food/meals for other members of this household?**

*Instructions:* Refer to question 9 of "Form 3 Part A – Demographic data/General household information" and record the initials/identifier(s) of the member.

Household member, record initials/identifier(s) \_\_\_\_\_  99=Don't know  98=No response

**12 How does/do the household member(s) that usually cook(s)/prepare(s) food/meals for other members of this household as stated in question 11 usually prepare(s) herself/himself/themselves before and after the preparation of meals?**

*Instruction:* Enter one code per category only.

| Before the preparation of meals                   | After the preparation of meals                          |
|---------------------------------------------------|---------------------------------------------------------|
| Code _____                                        | Code _____                                              |
| [1] Wash hands with soap and water                | [6] Don't clean, not needed/not dirty                   |
| [2] Wash hands with water only                    | [7] Don't clean, nothing to clean hands nearby/on hands |
| [3] Rub hands clean with some leaves/straw/ grass | [8] Other, specify _____                                |
| [4] Rub hands clean with some sand                | [99] Don't know                                         |
| [5] Rub hands clean with some cloth/fabric        | [98] No response                                        |

**13 How do members of this household usually prepare themselves before and after eating food/meals, including the household member that usually cooks/prepares food/meals as stated in question 11?**

*Instruction:* Enter one code per category only.

| Before the eating of food/meals                   | After the eating of food/meals                          |
|---------------------------------------------------|---------------------------------------------------------|
| Code _____                                        | Code _____                                              |
| [1] Wash hands with soap and water                | [6] Don't clean, not needed/not dirty                   |
| [2] Wash hands with water only                    | [7] Don't clean, nothing to clean hands nearby/on hands |
| [3] Rub hands clean with some leaves/straw/ grass | [8] Other, specify _____                                |
| [4] Rub hands clean with some sand                | [99] Don't know                                         |
| [5] Rub hands clean with some cloth/fabric        | [98] No response                                        |

**14 How do members of this household usually eat their food/meals, including the household member that usually cooks/prepares food/meals as stated in question 11?**

1=With cutlery  3=Other, specify \_\_\_\_\_  99=Don't know  
 2=With fingers  98=No response

**15 Do members of this household usually eat their food/meals from the same pot, including the household member that usually cooks/prepares food/meals as stated in question 11?**

1=Yes  2=No  99=Don't know  98=No response

**16 Where do members of this household usually get their main fresh/raw food items such as vegetables, fruits and grains/cereals, dairy products, eggs, meat and fish?**

*Instruction:* Enter one code per category only.

| Vegetables, fruits, grains/ cereals     | Dairy products                            | Eggs, meat, fish |
|-----------------------------------------|-------------------------------------------|------------------|
| Code _____                              | Code _____                                | Code _____       |
| [1] Self-farming (i.e. back-/courtyard) | [6] Self-farming (i.e. agricultural land) |                  |
| [2] Supermarket/Grocery store           | [7] Butcher                               |                  |
| [3] Friend/Family                       | [8] Other, specify _____                  |                  |
| [4] Open market                         | [99] Don't know                           |                  |
| [5] Street vendor                       | [98] No response                          |                  |

**17 Do members of this household usually consume/eat fresh/raw food items (e.g. vegetables, lettuce, fruits, dairy products, ice cream, eggs, meat and fish)? If so, which ones?**



Site \_\_\_\_\_ Subarea \_\_\_\_\_ House number \_\_\_\_\_

Interviewer ID \_\_\_\_\_

*Instruction:* Tick all that applies; more than one answer is possible.

- 1=Vegetables/Lettuce (cultivated on bush)       13=Vegetables/Lettuce (cultivated on ground)  
 2=Vegetables/Lettuce (wild harvesting from bush)       14=Vegetables/Lettuce (wild harvesting from ground)  
 3=Fruits (cultivated on bush/tree)       15=Fruits (cultivated on ground)  
 4=Fruits (wild harvesting from bush/tree)       16=Fruits (wild harvesting from ground)  
 5=Dairy products (i.e. milk, cheese, yoghurt from domesticated milk producing animals), specify \_\_\_\_\_       17=Dairy products (i.e. milk, cheese, yoghurt from non-domesticated milk producing animals), specify \_\_\_\_\_  
 6=Eggs (from domesticated poultry), specify \_\_\_\_\_       18=Eggs (from non-domesticated poultry), specify \_\_\_\_\_  
 7=Animal blood (from domesticated animals), specify \_\_\_\_\_       19=Animal blood (from non-domesticated animals), specify \_\_\_\_\_  
 8=Beef/Zebu/Buffalo (domesticated), specify \_\_\_\_\_       20=Poultry (domesticated; i.e. chicken, duck, pigeon, goose, turkey), specify \_\_\_\_\_  
 9=Pork (domesticated)       21=Goat (domesticated)  
 10=Sheep (domesticated)       22=Rodents (domesticated), specify \_\_\_\_\_  
 11=Meat from non-domesticated animals (i.e. antelope, boar, poultry, rodents, fish), specify \_\_\_\_\_       23=Fish/Seafood, specify \_\_\_\_\_  
 12=NO CONSUMPTION of fresh/raw food items       24=Ice cream  
 99=Don't know       98=No response

**18 Do members of this household consume meals/food items/beverages usually also outside the house? If so, which member(s) of this household and where?**

*Instructions:* Refer to question 9 of "Form 3 Part A – Demographic data/General household information" and record the initials/identifier of the member(s). Enter all codes that apply for the respective household member.

| Member 1<br>Initials/Identifier: _____ | Member 2<br>Initials/Identifier: _____ | Member 3<br>Initials/Identifier: _____         | Member 4<br>Initials/Identifier: _____ |
|----------------------------------------|----------------------------------------|------------------------------------------------|----------------------------------------|
| Code _____                             | Code _____                             | Code _____                                     | Code _____                             |
| [1] Restaurant<br>[2] Fast food chain  | [3] Cafeteria<br>[4] Street vendor     | [5] Other, specify _____<br>[6] Not applicable | [99] Don't know<br>[98] No response    |

**19 Which meals/food items/beverages do the member(s) of this household listed in question 18 usually consume outside the house?**

*Instructions:* Refer to question 9 of "Form 3 Part A – Demographic data/General household information" and record the initials/identifier of the member(s). List up to 5 meals/food items/beverages per household member. You can refer to food items listed in question 17. Skip this question if no household member consumes meals/food items/beverages outside the house as stated in Q18.

| Member 1<br>Initials/Identifier: _____ | Member 2<br>Initials/Identifier: _____ | Member 3<br>Initials/Identifier: _____ | Member 4<br>Initials/Identifier: _____ |
|----------------------------------------|----------------------------------------|----------------------------------------|----------------------------------------|
| 1: _____                               | 1: _____                               | 1: _____                               | 1: _____                               |
| 2: _____                               | 2: _____                               | 2: _____                               | 2: _____                               |
| 3: _____                               | 3: _____                               | 3: _____                               | 3: _____                               |
| 4: _____                               | 4: _____                               | 4: _____                               | 4: _____                               |
| 5: _____                               | 5: _____                               | 5: _____                               | 5: _____                               |

**WATER**

**20 What is the main water supply for members of this household for drinking, cooking/preparing food/meals, bathing, and cleaning (of house/individual house structure(s), clothing/kitchen tools)?**

*Instruction:* Enter one code per category only.

| Drinking                                                        | Cooking    | Bathing    | Cleaning   |
|-----------------------------------------------------------------|------------|------------|------------|
| Code _____                                                      | Code _____ | Code _____ | Code _____ |
| [1] Tap water (inside the house; private)                       |            |            |            |
| [2] Tap water (outside the house i.e. back-/courtyard; private) |            |            |            |

Site \_\_\_\_\_ Subarea \_\_\_\_\_ House number \_\_\_\_\_

Interviewer ID \_\_\_\_\_

- [3] Tap water (outside the house; public/shared)
  - [4] Standpipe/Piped water (inside the house; private)
  - [5] Standpipe/Piped water (outside the house i.e. back-/ courtyard; private)
  - [6] Standpipe/Piped water (outside the house; public/shared)
  - [7] Water truck (public; shared)
  - [8] Surface water (i.e. canal, irrigation canal)
  - [9] Surface water (i.e. lake, pond, river, stream)
  - [10] Spring water
  - [11] Rain water
  - [12] Well/Borehole (open/uncovered/unprotected)
  - [13] Well/Borehole (covered/protected)
  - [14] Bottled water
  - [15] Other, specify \_\_\_\_\_
- [99] Don't know      [98] No response

**21 Do members of this household usually treat water for drinking, cooking/ preparing food/meals, bathing, and cleaning (of house/individual house structure(s), clothing/ kitchen tools) prior to consumption? How is water usually treated?**

*Instruction:* Enter all codes that applies per category; more than one answer per category is possible.

| Drinking                                          | Cooking                                     | Bathing                                             | Cleaning                              |
|---------------------------------------------------|---------------------------------------------|-----------------------------------------------------|---------------------------------------|
| Code _____                                        | Code _____                                  | Code _____                                          | Code _____                            |
| [1] No, not at all                                | [7] No, only for children of this household | [8] No, only depending on the season (rainy season) | [9] Yes, boiling                      |
| [2] No, only for sick members of this household   | [9] Yes, boiling                            | [10] Yes, solar disinfection                        | [11] Yes, chlorination                |
| [3] No, only depending on the season (dry season) | [10] Yes, solar disinfection                | [11] Yes, chlorination                              | [99] Don't know      [98] No response |
| [4] Yes, filtration (i.e. cloth, ceramic, sand)   | [11] Yes, chlorination                      |                                                     |                                       |
| [5] Yes, sedimentation                            | [99] Don't know      [98] No response       |                                                     |                                       |
| [6] Other, specify _____                          |                                             |                                                     |                                       |

**22 Which member(s) of this household usually collect(s) the drinking water as stated in question 20 for other members of this household?**

*Instructions:* Refer to question 9 of "Form 3 Part A – Demographic data/General household information" and record the initials/identifier of the member.

Household member, record initials/identifier(s) \_\_\_\_\_  99=Don't know  98=No response

**23 How do members of this household usually store the drinking water stated in question 20?**

- 1=Water tank (uncovered)
- 2=Water tank (covered with i.e. cloth/fabric, lid, leaves)
- 3=Container (uncovered)
- 4=Container (covered with i.e. cloth/fabric, lid, leaves)
- 5=Clay pot (uncovered)
- 6=Clay pot (covered with i.e. cloth/fabric, lid, leaves)
- 7=Bucket (uncovered)
- 8=Bucket (covered with i.e. cloth/fabric, lid, leaves)
- 9=Bowl (uncovered)
- 10=Bowl (covered with i.e. cloth/fabric, lid, leaves)
- 11=Wooden pot (uncovered)
- 12=Wooden pot (covered with i.e. cloth/fabric, lid, leaves)
- 13=Skin vessel (i.e. goat, sheep, cattle; uncovered)
- 14=Skin vessel (i.e. goat, sheep, cattle; covered with i.e. cloth/fabric, lid, leaves)
- 15=NOT STORED
- 16=Other, specify \_\_\_\_\_
- 99=Don't know
- 98=No response

**24 If members of this household use a shared drinking water supply as stated in question 20, with how many other people is this drinking water supply usually shared?**

- 1=<10 people
- 2=11-24 people
- 3=25-49 people
- 4=>50 people
- 5=NOT SHARED
- 99=Don't know
- 98=No response



Site \_\_\_\_\_ Subarea \_\_\_\_\_ House number \_\_\_\_\_

Interviewer ID \_\_\_\_\_

| Farm animals/livestock                                                                     |                                                                | Domestic animals/pets                                        |
|--------------------------------------------------------------------------------------------|----------------------------------------------------------------|--------------------------------------------------------------|
| <input type="radio"/> 1=Cattle                                                             | <input type="radio"/> 9=Camel                                  | <input type="radio"/> 1=Dog                                  |
| <input type="radio"/> 2=Sheep                                                              | <input type="radio"/> 10= Rodents (i.e. rabbit), specify _____ | <input type="radio"/> 2=Rodents (i.e. rabbit), specify _____ |
| <input type="radio"/> 3=Donkey                                                             | <input type="radio"/> 11=Goat                                  | <input type="radio"/> 3=Cat                                  |
| <input type="radio"/> 4=Poultry (i.e. chicken, duck, pigeon, goose, turkey), specify _____ | <input type="radio"/> 12=Horse                                 | <input type="radio"/> 4=NO DOMESTIC ANIMALS/PETS             |
| <input type="radio"/> 5=Zebu                                                               | <input type="radio"/> 13=NO FARM ANIMALS/LIVESTOCK             | <input type="radio"/> 5=Other, specify _____                 |
| <input type="radio"/> 6=Pig                                                                | <input type="radio"/> 14=Other, specify _____                  | <input type="radio"/> 99=Don't know                          |
| <input type="radio"/> 7=Fish                                                               | <input type="radio"/> 99=Don't know                            | <input type="radio"/> 98=No response                         |
| <input type="radio"/> 8=Buffalo                                                            | <input type="radio"/> 98=No response                           |                                                              |

**30 Where do members of this household usually keep farm animals/livestock and domestic animals/pets of this household as stated in question 29?**

*Instruction:* Tick one answer per category only.

| Farm animals/livestock                                                                                                   | Domestic animals/pets                                                                  |
|--------------------------------------------------------------------------------------------------------------------------|----------------------------------------------------------------------------------------|
| <input type="radio"/> 1=Stable/Cage/Water basin on the property of the house (i.e. back-/courtyard)                      | <input type="radio"/> 1=Cage/Chain near the house (i.e. back-/courtyard)               |
| <input type="radio"/> 2=Stable/Cage/Water basin outside the house in the community                                       | <input type="radio"/> 2=Cage/Chain outside the house in the community                  |
| <input type="radio"/> 3=Stable/Cage/Water basin outside the community                                                    | <input type="radio"/> 3=Cage/Chain outside the community (public)                      |
| <input type="radio"/> 4=Free range/Surface water/Spring water on the property of the house (i.e. house, back-/courtyard) | <input type="radio"/> 4=Free range near the house (i.e. in the house, back-/courtyard) |
| <input type="radio"/> 5=Free range/Surface water/Spring water outside the house in the community                         | <input type="radio"/> 5=Free range outside the house in the community                  |
| <input type="radio"/> 6=Free range/Surface water/Spring water outside the community                                      | <input type="radio"/> 6=Free range outside the community                               |
| <input type="radio"/> 7=Not applicable (nowhere/no farm animals/livestock)                                               | <input type="radio"/> 7=Not applicable (nowhere/no domestic animals/pets)              |
| <input type="radio"/> 8=Other, specify _____                                                                             | <input type="radio"/> 8=Other, specify _____                                           |
| <input type="radio"/> 99=Don't know                                                                                      | <input type="radio"/> 99=Don't know                                                    |
| <input type="radio"/> 98=No response                                                                                     | <input type="radio"/> 98=No response                                                   |

**31 What is the extent of the livestock farming that members of this household practice?**

- |                                                                        |                                              |
|------------------------------------------------------------------------|----------------------------------------------|
| <input type="radio"/> 1=Own demand ("backyard farming")                | <input type="radio"/> 4=Other, specify _____ |
| <input type="radio"/> 2=Not applicable (no livestock farming)          | <input type="radio"/> 99=Don't know          |
| <input type="radio"/> 3=Mass/Industrial demand ("mass animal farming") | <input type="radio"/> 98=No response         |

**32 Which water supply do members of this household usually use to water farm animals/livestock and domestic animals/pets of this household as stated in question 29?**

*Instruction:* Enter one code per category only.

| Farm animals/livestock                                                       | Domestic animals/pets |
|------------------------------------------------------------------------------|-----------------------|
| Code _____                                                                   | Code _____            |
| [1] Tap water (inside the house; private)                                    |                       |
| [2] Tap water (outside the house i.e. back-/courtyard; private)              |                       |
| [3] Tap water (outside the house; public/shared)                             |                       |
| [4] Standpipe/Piped water (inside the house; private)                        |                       |
| [5] Standpipe/Piped water (outside the house i.e. back-/ courtyard; private) |                       |
| [6] Standpipe/Piped water (outside the house; public/shared)                 |                       |

Site \_\_\_\_\_ Subarea \_\_\_\_\_ House number \_\_\_\_\_

Interviewer ID \_\_\_\_\_

- |                                                                           |                 |                  |
|---------------------------------------------------------------------------|-----------------|------------------|
| [7] Water truck (public; shared)                                          | [99] Don't know | [98] No response |
| [8] Surface water (i.e. canal, irrigation canal)                          |                 |                  |
| [9] Surface water (i.e. lake, pond, river, stream)                        |                 |                  |
| [10] Spring water                                                         |                 |                  |
| [11] Rain water                                                           |                 |                  |
| [12] Well/Borehole (open/uncovered/unprotected)                           |                 |                  |
| [13] Well/Borehole (covered/protected)                                    |                 |                  |
| [14] Not applicable (no farm animals/livestock; no domestic animals/pets) |                 |                  |
| [15] Other, specify _____                                                 |                 |                  |

**33 Do members of this household usually wash their hands after they fed & watered and cleaned the stable/cage/water basin of the farm animals/livestock and domestic animals/pets of this household as stated in question 29?**

*Instruction:* Enter one code per category only.

| Farm animals/livestock                            | Domestic animals/pets                                                    |
|---------------------------------------------------|--------------------------------------------------------------------------|
| Code _____                                        | Code _____                                                               |
| [1] Wash hands with soap and water                | [7] Don't clean, nothing to clean hands nearby/on hands                  |
| [2] Wash hands with water only                    | [8] Other, specify _____                                                 |
| [3] Rub hands clean with some leaves/straw/ grass | [9] Not applicable (no farm animals/livestock; no domestic animals/pets) |
| [4] Rub hands clean with some sand                | [99] Don't know                                                          |
| [5] Rub hands clean with some cloth/fabric        | [98] No response                                                         |
| [6] Don't clean, not needed/not dirty             |                                                                          |

**CROP FARMING**

**34 What kind of crops do members of this household grow/cultivate?**

*Instruction:* Tick all that applies; more than one answer is possible.

- |                                                                       |                                               |
|-----------------------------------------------------------------------|-----------------------------------------------|
| <input type="radio"/> 1=Coffee                                        | <input type="radio"/> 10=Tobacco              |
| <input type="radio"/> 2=Rice                                          | <input type="radio"/> 11=Sugar cane           |
| <input type="radio"/> 3=Fruits (cultivated on bush/tree)              | <input type="radio"/> 12=Chad/Chat            |
| <input type="radio"/> 4=Fruits (cultivated on the ground)             | <input type="radio"/> 13=Bees/Honey           |
| <input type="radio"/> 5=Vegetables/Lettuce (cultivated on bush/tree)  | <input type="radio"/> 14=Cotton               |
| <input type="radio"/> 6=Vegetables/Lettuce (cultivated on the ground) | <input type="radio"/> 15=NO CROPS             |
| <input type="radio"/> 7=Grains (i.e. wheat, barley, oat, corn)        | <input type="radio"/> 16=Other, specify _____ |
| <input type="radio"/> 8=Tea                                           | <input type="radio"/> 99=Don't know           |
| <input type="radio"/> 9=Cashew                                        | <input type="radio"/> 98=No response          |

**35 Where do members of this household have the farmland/agricultural land for crop farming?**

- |                                                                             |                                                            |
|-----------------------------------------------------------------------------|------------------------------------------------------------|
| <input type="radio"/> 1=On the property of the house (i.e. back-/courtyard) | <input type="radio"/> 4=Outside the house in the community |
| <input type="radio"/> 2=Outside the community                               | <input type="radio"/> 5=Not applicable (no crop farming)   |
| <input type="radio"/> 3=Other, specify _____                                | <input type="radio"/> 99=Don't know                        |
|                                                                             | <input type="radio"/> 98=No response                       |

**36 What is the extent of the crop farming that members of this household practice?**

- |                                                                      |                                              |
|----------------------------------------------------------------------|----------------------------------------------|
| <input type="radio"/> 1=Own demand ("backyard farming")              | <input type="radio"/> 4=Other, specify _____ |
| <input type="radio"/> 2=Not applicable (no crop farming)             | <input type="radio"/> 99=Don't know          |
| <input type="radio"/> 3=Mass/Industrial demand ("mass crop farming") | <input type="radio"/> 98=No response         |

**37 Do members of this household usually use herbicides, pesticides and fertilizers for the crop farming as stated in question 34?**

*Instruction:* Tick one answer per category only.

| Herbicides                                     | Pesticides                                     | Fertilizers                                     |
|------------------------------------------------|------------------------------------------------|-------------------------------------------------|
| <input type="radio"/> 1=Yes, specify herbicide | <input type="radio"/> 1=Yes, specify pesticide | <input type="radio"/> 1=Yes, specify fertilizer |
| _____                                          | _____                                          | _____                                           |

Site \_\_\_\_\_ Subarea \_\_\_\_\_ House number \_\_\_\_\_

Interviewer ID \_\_\_\_\_

- 2=Not applicable (no crop farming)
- 3=No use of herbicides
- 99=Don't know
- 98=No response

- 2=Not applicable (no crop farming)
- 3=No use of pesticides
- 99=Don't know
- 98=No response

- 2=Not applicable (no crop farming)
- 3=No use of fertilizers
- 99=Don't know
- 98=No response

**38 Do members of this household usually wash their hands after the fieldwork for the crop farming as stated in question 34?**

- 1=Yes, wash hands with soap and water
- 2=Yes, rub hands clean with some leaves/straw/grass
- 3=Yes, rub hands clean with some cloth/fabric
- 4=Not applicable (no crop farming)
- 5=Yes, wash hands with water only
- 6=Yes, rub hands clean with some sand
- 7=No, don't clean my hands
- 8=Other, specify \_\_\_\_\_
- 99=Don't know
- 98=No response

For peer review only

Site \_\_\_\_\_ Subarea \_\_\_\_\_ House number \_\_\_\_\_

Interviewer ID \_\_\_\_\_

## FORM 4: ASSESSMENT OF OVERALL, AGE- AND SEX-STRATIFIED GENERIC HEALTHCARE UTILIZATION

### Part A – Assessment of *generic* healthcare utilization

#### Instructions to the interviewer

- Complete this form only if the respondent consented to participate (see “Form 2 - CONSENT FORM”); the respondent as defined for this investigation is an adult (at the country-specific legal age of majority) household member and decision-maker with respect to daily healthcare/healthcare utilization for the entire household and its members; it must not be e.g. a neighbour or a visitor.
- Refer to “Form 3 – Part A - GENERAL HOUSEHOLD INFORMATION” as a reference to obtain the total number of household members as well as age and sex of each household member.
- Collect data about all household members regardless of whether all household members are present at the time of the interview; collecting and recording data only about individuals present at the time of the interview will result in biased data.
- A household is/household members are defined as a person or a group of related or unrelated persons that live together in the same dwelling unit, that acknowledge one male or female adult as the head of the household, that share the same housekeeping arrangements, that are considered to constitute one unit, and that provide themselves with food or other essentials for living.
- “Site” and “Subarea” must be entered each as a 3-digit, “House number” as a 4-digit, and “Interviewer ID” as a 2-digit code (use lists individually prepared for each site to obtain codes). “Study label” must be a combination of a 3-digit “Site” code, a 3-digit “Subarea” code and a 4-digit “House number” code; the “Interviewer ID” must be entered as a 3-digit code.
- Abbreviation: HCF=private/public primary/secondary/tertiary healthcare facility.

#### HOUSEHOLD MEMBERS

##### 1 Record the total number of household members of this house (at the day of visit).

*Instructions:* The total number of household members must be recorded as a 2-digit number; see also “Form 3 – Part A - GENERAL HOUSEHOLD INFORMATION”.

Total number of household members: \_\_\_\_\_

##### 2 Record the number of FEMALE household members by each of the following age groups:

*Instructions:* The total number of female household members by age group must be recorded as a 2-digit number; see also “Form 3 – Part A - GENERAL HOUSEHOLD INFORMATION”.

<2years: \_\_\_\_\_ ≥2 to <5years: \_\_\_\_\_ ≥5 to <15years: \_\_\_\_\_ ≥15years: \_\_\_\_\_

##### 3 Record the number of MALE household members by each of the following age groups:

*Instructions:* The total number of male household members by age group must be recorded as a 2-digit number; see also “Form 3 – Part A - GENERAL HOUSEHOLD INFORMATION”.

<2years: \_\_\_\_\_ ≥2 to <5years: \_\_\_\_\_ ≥5 to <15years: \_\_\_\_\_ ≥15years: \_\_\_\_\_

#### HEALTHCARE SEEKING BEHAVIOR

##### 4 Record where female/male household members <2years/≥2 to <5years/≥5 to <15years/≥15years of age usually seek healthcare for the following signs/symptoms. Please rate using a range from 1-4.

#### *Instructions:*

- Complete question 4 separately for female and male household members <2years, ≥2 to <5years, ≥5 to <15years and ≥15years of age and circle the sex and age group Q4 was completed for; skip question 4 if there is no female/male household member <2years/ ≥2 to <5years/ ≥5 to <15years/ ≥15years of age.
- Provide an answer to each healthcare option for each sign/symptom; use range 1-4 for rating (1=1<sup>st</sup> choice; 2=2<sup>nd</sup> choice; 3=3<sup>rd</sup> choice; 4=not chosen); enter a code where applicable by using prepared lists (use lists individually prepared for each site to obtain codes); tick “Don’t know” if applicable.

Site \_\_\_\_\_ Subarea \_\_\_\_\_ House number \_\_\_\_\_

Interviewer ID \_\_\_\_\_

| Sign/Symptom                                   | Healthcare options       |      |                          |      |                          |                          |                          |                          |                          |                       |
|------------------------------------------------|--------------------------|------|--------------------------|------|--------------------------|--------------------------|--------------------------|--------------------------|--------------------------|-----------------------|
|                                                | Study-HCF                |      | Other HCF                |      | Physician                | Pharmacy                 | Traditional healer       | Nowhere Self-treatment   | Nowhere Nothing          | Don't know            |
|                                                | Rate                     | Code | Rate                     | Code | Rate                     | Rate                     | Rate                     | Rate                     | Rate                     | Tick                  |
| <b>1 [A]</b> Fever, any                        | O=1<br>O=2<br>O=3<br>O=4 |      | O=1<br>O=2<br>O=3<br>O=4 |      | O=1<br>O=2<br>O=3<br>O=4 | O=1<br>O=2<br>O=3<br>O=4 | O=1<br>O=2<br>O=3<br>O=4 | O=1<br>O=2<br>O=3<br>O=4 | O=1<br>O=2<br>O=3<br>O=4 | <input type="radio"/> |
| <b>2</b> Fever <3days (continuous)             | O=1<br>O=2<br>O=3<br>O=4 |      | O=1<br>O=2<br>O=3<br>O=4 |      | O=1<br>O=2<br>O=3<br>O=4 | O=1<br>O=2<br>O=3<br>O=4 | O=1<br>O=2<br>O=3<br>O=4 | O=1<br>O=2<br>O=3<br>O=4 | O=1<br>O=2<br>O=3<br>O=4 | <input type="radio"/> |
| <b>3</b> Fever ≥3days (continuous)             | O=1<br>O=2<br>O=3<br>O=4 |      | O=1<br>O=2<br>O=3<br>O=4 |      | O=1<br>O=2<br>O=3<br>O=4 | O=1<br>O=2<br>O=3<br>O=4 | O=1<br>O=2<br>O=3<br>O=4 | O=1<br>O=2<br>O=3<br>O=4 | O=1<br>O=2<br>O=3<br>O=4 | <input type="radio"/> |
| <b>4</b> Chills Shivering                      | O=1<br>O=2<br>O=3<br>O=4 |      | O=1<br>O=2<br>O=3<br>O=4 |      | O=1<br>O=2<br>O=3<br>O=4 | O=1<br>O=2<br>O=3<br>O=4 | O=1<br>O=2<br>O=3<br>O=4 | O=1<br>O=2<br>O=3<br>O=4 | O=1<br>O=2<br>O=3<br>O=4 | <input type="radio"/> |
| <b>5</b> Convulsion                            | O=1<br>O=2<br>O=3<br>O=4 |      | O=1<br>O=2<br>O=3<br>O=4 |      | O=1<br>O=2<br>O=3<br>O=4 | O=1<br>O=2<br>O=3<br>O=4 | O=1<br>O=2<br>O=3<br>O=4 | O=1<br>O=2<br>O=3<br>O=4 | O=1<br>O=2<br>O=3<br>O=4 | <input type="radio"/> |
| <b>6</b> Weight loss                           | O=1<br>O=2<br>O=3<br>O=4 |      | O=1<br>O=2<br>O=3<br>O=4 |      | O=1<br>O=2<br>O=3<br>O=4 | O=1<br>O=2<br>O=3<br>O=4 | O=1<br>O=2<br>O=3<br>O=4 | O=1<br>O=2<br>O=3<br>O=4 | O=1<br>O=2<br>O=3<br>O=4 | <input type="radio"/> |
| <b>7</b> Dehydration                           | O=1<br>O=2<br>O=3<br>O=4 |      | O=1<br>O=2<br>O=3<br>O=4 |      | O=1<br>O=2<br>O=3<br>O=4 | O=1<br>O=2<br>O=3<br>O=4 | O=1<br>O=2<br>O=3<br>O=4 | O=1<br>O=2<br>O=3<br>O=4 | O=1<br>O=2<br>O=3<br>O=4 | <input type="radio"/> |
| <b>8</b> Malaise Weakness/ Fatigue             | O=1<br>O=2<br>O=3<br>O=4 |      | O=1<br>O=2<br>O=3<br>O=4 |      | O=1<br>O=2<br>O=3<br>O=4 | O=1<br>O=2<br>O=3<br>O=4 | O=1<br>O=2<br>O=3<br>O=4 | O=1<br>O=2<br>O=3<br>O=4 | O=1<br>O=2<br>O=3<br>O=4 | <input type="radio"/> |
| <b>9</b> Aches/ Pain (muscle/joint/bone)       | O=1<br>O=2<br>O=3<br>O=4 |      | O=1<br>O=2<br>O=3<br>O=4 |      | O=1<br>O=2<br>O=3<br>O=4 | O=1<br>O=2<br>O=3<br>O=4 | O=1<br>O=2<br>O=3<br>O=4 | O=1<br>O=2<br>O=3<br>O=4 | O=1<br>O=2<br>O=3<br>O=4 | <input type="radio"/> |
| <b>10</b> Headache                             | O=1<br>O=2<br>O=3<br>O=4 |      | O=1<br>O=2<br>O=3<br>O=4 |      | O=1<br>O=2<br>O=3<br>O=4 | O=1<br>O=2<br>O=3<br>O=4 | O=1<br>O=2<br>O=3<br>O=4 | O=1<br>O=2<br>O=3<br>O=4 | O=1<br>O=2<br>O=3<br>O=4 | <input type="radio"/> |
| <b>11</b> Dizziness/ Confusion Unconsciousness | O=1<br>O=2<br>O=3<br>O=4 |      | O=1<br>O=2<br>O=3<br>O=4 |      | O=1<br>O=2<br>O=3<br>O=4 | O=1<br>O=2<br>O=3<br>O=4 | O=1<br>O=2<br>O=3<br>O=4 | O=1<br>O=2<br>O=3<br>O=4 | O=1<br>O=2<br>O=3<br>O=4 | <input type="radio"/> |
| <b>12</b> Blood pressure disorders             | O=1<br>O=2<br>O=3<br>O=4 |      | O=1<br>O=2<br>O=3<br>O=4 |      | O=1<br>O=2<br>O=3<br>O=4 | O=1<br>O=2<br>O=3<br>O=4 | O=1<br>O=2<br>O=3<br>O=4 | O=1<br>O=2<br>O=3<br>O=4 | O=1<br>O=2<br>O=3<br>O=4 | <input type="radio"/> |



Site \_\_\_\_\_ Subarea \_\_\_\_\_ House number \_\_\_\_\_

Interviewer ID \_\_\_\_\_

| Sign/Symptom                                                | Healthcare options |      |           |      |           |          |                    |                        |                 |            |
|-------------------------------------------------------------|--------------------|------|-----------|------|-----------|----------|--------------------|------------------------|-----------------|------------|
|                                                             | Study-HCF          |      | Other HCF |      | Physician | Pharmacy | Traditional healer | Nowhere Self-treatment | Nowhere Nothing | Don't know |
|                                                             | Rate               | Code | Rate      | Code | Rate      | Rate     | Rate               | Rate                   | Rate            | Code       |
| <b>13</b> Heart disorders                                   | O=1                |      | O=1       |      | O=1       | O=1      | O=1                | O=1                    | O=1             | ○          |
|                                                             | O=2                |      | O=2       |      | O=2       | O=2      | O=2                | O=2                    | O=2             |            |
|                                                             | O=3                |      | O=3       |      | O=3       | O=3      | O=3                | O=3                    | O=3             |            |
|                                                             | O=4                |      | O=4       |      | O=4       | O=4      | O=4                | O=4                    | O=4             |            |
| <b>14</b> Nausea Vomitting                                  | O=1                |      | O=1       |      | O=1       | O=1      | O=1                | O=1                    | O=1             | ○          |
|                                                             | O=2                |      | O=2       |      | O=2       | O=2      | O=2                | O=2                    | O=2             |            |
|                                                             | O=3                |      | O=3       |      | O=3       | O=3      | O=3                | O=3                    | O=3             |            |
|                                                             | O=4                |      | O=4       |      | O=4       | O=4      | O=4                | O=4                    | O=4             |            |
| <b>15</b> Diarrhea (watery/ bloody/ mucopurulent)           | O=1                |      | O=1       |      | O=1       | O=1      | O=1                | O=1                    | O=1             | ○          |
|                                                             | O=2                |      | O=2       |      | O=2       | O=2      | O=2                | O=2                    | O=2             |            |
|                                                             | O=3                |      | O=3       |      | O=3       | O=3      | O=3                | O=3                    | O=3             |            |
|                                                             | O=4                |      | O=4       |      | O=4       | O=4      | O=4                | O=4                    | O=4             |            |
| <b>16</b> Abdominal pain Intestinal pain                    | O=1                |      | O=1       |      | O=1       | O=1      | O=1                | O=1                    | O=1             | ○          |
|                                                             | O=2                |      | O=2       |      | O=2       | O=2      | O=2                | O=2                    | O=2             |            |
|                                                             | O=3                |      | O=3       |      | O=3       | O=3      | O=3                | O=3                    | O=3             |            |
|                                                             | O=4                |      | O=4       |      | O=4       | O=4      | O=4                | O=4                    | O=4             |            |
| <b>17</b> Blood loss/ Bleeding (internal)                   | O=1                |      | O=1       |      | O=1       | O=1      | O=1                | O=1                    | O=1             | ○          |
|                                                             | O=2                |      | O=2       |      | O=2       | O=2      | O=2                | O=2                    | O=2             |            |
|                                                             | O=3                |      | O=3       |      | O=3       | O=3      | O=3                | O=3                    | O=3             |            |
|                                                             | O=4                |      | O=4       |      | O=4       | O=4      | O=4                | O=4                    | O=4             |            |
| <b>18</b> Blood loss/ Bleeding (external)                   | O=1                |      | O=1       |      | O=1       | O=1      | O=1                | O=1                    | O=1             | ○          |
|                                                             | O=2                |      | O=2       |      | O=2       | O=2      | O=2                | O=2                    | O=2             |            |
|                                                             | O=3                |      | O=3       |      | O=3       | O=3      | O=3                | O=3                    | O=3             |            |
|                                                             | O=4                |      | O=4       |      | O=4       | O=4      | O=4                | O=4                    | O=4             |            |
| <b>19</b> Sneezing Runny nose                               | O=1                |      | O=1       |      | O=1       | O=1      | O=1                | O=1                    | O=1             | ○          |
|                                                             | O=2                |      | O=2       |      | O=2       | O=2      | O=2                | O=2                    | O=2             |            |
|                                                             | O=3                |      | O=3       |      | O=3       | O=3      | O=3                | O=3                    | O=3             |            |
|                                                             | O=4                |      | O=4       |      | O=4       | O=4      | O=4                | O=4                    | O=4             |            |
| <b>20</b> Cough                                             | O=1                |      | O=1       |      | O=1       | O=1      | O=1                | O=1                    | O=1             | ○          |
|                                                             | O=2                |      | O=2       |      | O=2       | O=2      | O=2                | O=2                    | O=2             |            |
|                                                             | O=3                |      | O=3       |      | O=3       | O=3      | O=3                | O=3                    | O=3             |            |
|                                                             | O=4                |      | O=4       |      | O=4       | O=4      | O=4                | O=4                    | O=4             |            |
| <b>21</b> Rapid breathing/ shortness of breath              | O=1                |      | O=1       |      | O=1       | O=1      | O=1                | O=1                    | O=1             | ○          |
|                                                             | O=2                |      | O=2       |      | O=2       | O=2      | O=2                | O=2                    | O=2             |            |
|                                                             | O=3                |      | O=3       |      | O=3       | O=3      | O=3                | O=3                    | O=3             |            |
|                                                             | O=4                |      | O=4       |      | O=4       | O=4      | O=4                | O=4                    | O=4             |            |
| <b>22</b> Severe breathing/ Difficulties in breathing       | O=1                |      | O=1       |      | O=1       | O=1      | O=1                | O=1                    | O=1             | ○          |
|                                                             | O=2                |      | O=2       |      | O=2       | O=2      | O=2                | O=2                    | O=2             |            |
|                                                             | O=3                |      | O=3       |      | O=3       | O=3      | O=3                | O=3                    | O=3             |            |
|                                                             | O=4                |      | O=4       |      | O=4       | O=4      | O=4                | O=4                    | O=4             |            |
| <b>23</b> Skin inflammation (rashes/ redness/ pus/ itching) | O=1                |      | O=1       |      | O=1       | O=1      | O=1                | O=1                    | O=1             | ○          |
|                                                             | O=2                |      | O=2       |      | O=2       | O=2      | O=2                | O=2                    | O=2             |            |
|                                                             | O=3                |      | O=3       |      | O=3       | O=3      | O=3                | O=3                    | O=3             |            |
|                                                             | O=4                |      | O=4       |      | O=4       | O=4      | O=4                | O=4                    | O=4             |            |
| <b>24</b> Swelling/ Edema                                   | O=1                |      | O=1       |      | O=1       | O=1      | O=1                | O=1                    | O=1             | ○          |
|                                                             | O=2                |      | O=2       |      | O=2       | O=2      | O=2                | O=2                    | O=2             |            |
|                                                             | O=3                |      | O=3       |      | O=3       | O=3      | O=3                | O=3                    | O=3             |            |
|                                                             | O=4                |      | O=4       |      | O=4       | O=4      | O=4                | O=4                    | O=4             |            |
| <b>25</b> Jaundice                                          | O=1                |      | O=1       |      | O=1       | O=1      | O=1                | O=1                    | O=1             | ○          |
|                                                             | O=2                |      | O=2       |      | O=2       | O=2      | O=2                | O=2                    | O=2             |            |
|                                                             | O=3                |      | O=3       |      | O=3       | O=3      | O=3                | O=3                    | O=3             |            |
|                                                             | O=4                |      | O=4       |      | O=4       | O=4      | O=4                | O=4                    | O=4             |            |

Site \_\_\_\_\_ Subarea \_\_\_\_\_ House number \_\_\_\_\_

Interviewer ID \_\_\_\_\_

## FORM 4: ASSESSMENT OF OVERALL, AGE- AND SEX-STRATIFIED GENERIC HEALTHCARE UTILIZATION

### Part B – Healthcare-associated factors/Vaccination/Disease perception

#### TRAVEL HEALTHCARE FACILITY

- 1 In case a healthcare facility (HCF) was rated the 1<sup>st</sup> choice of care in question 4A (fever), what is the main mode of transportation, travel time (depending on mode of transportation), travel cost (depending on mode of transportation) and travel distance (depending on mode of transportation) that is usually taken to get there?**

*Instructions:* Enter one code per category and sex as well as age group only. Skip this question if there is no female/male member <2years/≥2 to <5years/≥5 to <15years/≥15years of age in this household (see also question 2 and 3 of this form PartA). Skip this question if no HCF was rated the 1<sup>st</sup> choice of care in question 4A for female/male member <2years/≥2 to <5years/≥5 to <15years/≥15years of age. Record the travel time as minute(s) [min]/ hour(s) [hr], the total costs in USD, including potential gifts, favours and tips, and the total distance as meter(s) [m]/kilometre(s) [km].

| Female                                                |                |                       |           | Male                     |                |                  |           |
|-------------------------------------------------------|----------------|-----------------------|-----------|--------------------------|----------------|------------------|-----------|
| <2 years                                              | ≥2 to <5 years | ≥5 to <15 years       | ≥15 years | <2 years                 | ≥2 to <5 years | ≥5 to <15 years  | ≥15 years |
| <b>1.1 Transportation mode</b>                        |                |                       |           |                          |                |                  |           |
| Code ____                                             | Code ____      | Code ____             | Code ____ | Code ____                | Code ____      | Code ____        | Code ____ |
| [1] Private transportation (i.e. motorbike, car, bus) |                | [3] Walking           |           | [5] Other, specify _____ |                |                  |           |
| [2] Public transportation (i.e. motorbike, car, bus)  |                | [4] Bicycle           |           | [99] Don't know          |                | [98] No response |           |
| <b>1.2 Travel time</b>                                |                |                       |           |                          |                |                  |           |
| Code ____                                             | Code ____      | Code ____             | Code ____ | Code ____                | Code ____      | Code ____        | Code ____ |
| [1] <30 mins                                          |                | [3] ≥1.0 to <2.0 hrs  |           | [5] ≥3.0 to <4.0 hrs     |                | [99] Don't know  |           |
| [2] ≥30 to <60 mins                                   |                | [4] ≥2.0 to <3.0 hrs  |           | [6] ≥4.0 hrs             |                | [98] No response |           |
| <b>1.3 Travel cost</b>                                |                |                       |           |                          |                |                  |           |
| Code ____                                             | Code ____      | Code ____             | Code ____ | Code ____                | Code ____      | Code ____        | Code ____ |
| [1] <1.0 USD                                          |                | [3] ≥3.0 to <5.0 USD  |           | [5] ≥10.0 USD            |                | [99] Don't know  |           |
| [2] ≥1.0 to <3.0 USD                                  |                | [4] ≥5.0 to <10.0 USD |           | [98] No response         |                |                  |           |
| <b>1.4 Travel distance</b>                            |                |                       |           |                          |                |                  |           |
| Code ____                                             | Code ____      | Code ____             | Code ____ | Code ____                | Code ____      | Code ____        | Code ____ |
| [1] <500 m                                            |                | [3] ≥1.0 to <2.0 km   |           | [5] ≥3.0 to <4.0 km      |                | [99] Don't know  |           |
| [2] ≥500 m to <1.0 km                                 |                | [4] ≥2.0 to <3.0 km   |           | [6] ≥4.0 km              |                | [98] No response |           |

#### INSURANCE

- 2 For which members of this household does the insurance cover health expenses?**

*Instructions:* Enter one code per category. Skip this question if there is no member <2years/≥2 to <5years/≥5 to <15years/≥15years of age in this household (see question 2 and 3 of this form PartA).

| <2 years   | ≥2 to <5 years | ≥5 to <15 years | ≥15 years        |
|------------|----------------|-----------------|------------------|
| Code _____ | Code _____     | Code _____      | Code _____       |
| [1] Yes    | [2] No         | [99] Don't know | [98] No response |

Site \_\_\_\_\_ Subarea \_\_\_\_\_ House number \_\_\_\_\_

Interviewer ID \_\_\_\_\_

### 3 What kind of health expenses are usually covered by the insurance for members of this household?

*Instructions:* Enter one code by category and age group only. Skip this question if there is no member <2years/≥2 to <5years/≥5 to <15years/≥15years of age in this household (see also question 2 and 3 of this form PartA). Skip this question if there is no insurance that covers health expenses for <2years/≥2 to <5years/≥5 to <15years/≥15years of age.

|                                                                                | <2 years   | ≥2 to <5years | ≥5 to <15years  | ≥15years         |
|--------------------------------------------------------------------------------|------------|---------------|-----------------|------------------|
|                                                                                | [1] Yes    | [2] No        | [99] Don't know | [98] No response |
| <b>1</b> Registration                                                          | Code _____ | Code _____    | Code _____      | Code _____       |
| <b>2</b> Consultation/ Doctor's visit                                          | Code _____ | Code _____    | Code _____      | Code _____       |
| <b>3</b> Physical examination - general                                        | Code _____ | Code _____    | Code _____      | Code _____       |
| <b>4</b> Physical examination – specific, specify _____                        | Code _____ | Code _____    | Code _____      | Code _____       |
| <b>5</b> Diagnostics - general laboratory diagnostics                          | Code _____ | Code _____    | Code _____      | Code _____       |
| <b>6</b> Diagnostics - specific laboratory diagnostics, specify _____          | Code _____ | Code _____    | Code _____      | Code _____       |
| <b>7</b> Diagnostics - general imaging                                         | Code _____ | Code _____    | Code _____      | Code _____       |
| <b>8</b> Diagnostics - specific imaging, specify _____                         | Code _____ | Code _____    | Code _____      | Code _____       |
| <b>9</b> Diagnostics - other, specify _____                                    | Code _____ | Code _____    | Code _____      | Code _____       |
| <b>10</b> Treatment - general medication                                       | Code _____ | Code _____    | Code _____      | Code _____       |
| <b>11</b> Treatment - specific medication, specify _____                       | Code _____ | Code _____    | Code _____      | Code _____       |
| <b>12</b> Treatment - other medication, specify _____                          | Code _____ | Code _____    | Code _____      | Code _____       |
| <b>13</b> Treatment - interventions (other than surgery), specify _____        | Code _____ | Code _____    | Code _____      | Code _____       |
| <b>14</b> Treatment Surgery                                                    | Code _____ | Code _____    | Code _____      | Code _____       |
| <b>15</b> Hospitalization <7days                                               | Code _____ | Code _____    | Code _____      | Code _____       |
| <b>16</b> Hospitalization ≥7days                                               | Code _____ | Code _____    | Code _____      | Code _____       |
| <b>17</b> Emergency services                                                   | Code _____ | Code _____    | Code _____      | Code _____       |
| <b>18</b> Antenatal care                                                       | Code _____ | Code _____    | Code _____      | Code _____       |
| <b>19</b> Postnatal care                                                       | Code _____ | Code _____    | Code _____      | Code _____       |
| <b>20</b> Preventive medicine                                                  | Code _____ | Code _____    | Code _____      | Code _____       |
| <b>21</b> Vaccination                                                          | Code _____ | Code _____    | Code _____      | Code _____       |
| <b>22</b> Home healthcare (i.e. elderly, disabled, chronic/long-term diseased) | Code _____ | Code _____    | Code _____      | Code _____       |
| <b>23</b> Supportive therapy (i.e. physiotherapy, ergotherapy, rehabilitation) | Code _____ | Code _____    | Code _____      | Code _____       |

Site \_\_\_\_\_ Subarea \_\_\_\_\_ House number \_\_\_\_\_

Interviewer ID \_\_\_\_\_

**ETHNOGRAPHY****4 To which religion/ethnic group/tribe belong members of this household?**

*Instructions:* Give one answer by age group only. Skip this question if there is no member >2years/≥2 to <5years/≥5 to <15years/≥15years of age in this household (see also question 2 and 3 of this form PartA).

|                             | <2 years                                                                    | ≥2 to <5years                                                               | ≥5 to <15years                                                              | ≥15years                                                                    |
|-----------------------------|-----------------------------------------------------------------------------|-----------------------------------------------------------------------------|-----------------------------------------------------------------------------|-----------------------------------------------------------------------------|
| Religion/Ethnic group/Tribe | _____                                                                       | _____                                                                       | _____                                                                       | _____                                                                       |
|                             | <input type="radio"/> 99=Don't know<br><input type="radio"/> 98=No response | <input type="radio"/> 99=Don't know<br><input type="radio"/> 98=No response | <input type="radio"/> 99=Don't know<br><input type="radio"/> 98=No response | <input type="radio"/> 99=Don't know<br><input type="radio"/> 98=No response |

**5 Does the religion/ethnic group/tribe as stated in question 4 influence the various aspects of utilization of healthcare for members of this household?**

*Instructions:* Enter one code by category and age group only. Skip this question if there is member >2years/≥2 to <5years/≥5 to <15years/≥15years of age in this household (see also question 2 and 3 of this form PartA).

|                                                                                              | <2 years   | ≥2 to <5years | ≥5 to <15years  | ≥15years         |
|----------------------------------------------------------------------------------------------|------------|---------------|-----------------|------------------|
|                                                                                              | [1] Yes    | [2] No        | [99] Don't know | [98] No response |
| <b>1</b> Visiting a healthcare facility (i.e. hospital, health care center, health post)     | Code _____ | Code _____    | Code _____      | Code _____       |
| <b>2</b> Visiting a physician                                                                | Code _____ | Code _____    | Code _____      | Code _____       |
| <b>3</b> Visiting a pharmacy                                                                 | Code _____ | Code _____    | Code _____      | Code _____       |
| <b>4</b> Visiting a traditional healer                                                       | Code _____ | Code _____    | Code _____      | Code _____       |
| <b>5</b> Deciding for self-treatment                                                         | Code _____ | Code _____    | Code _____      | Code _____       |
| <b>6</b> Deciding for non-treatment                                                          | Code _____ | Code _____    | Code _____      | Code _____       |
| <b>7</b> Physical examination – general                                                      | Code _____ | Code _____    | Code _____      | Code _____       |
| <b>8</b> Physical examination – specific, specify _____                                      | Code _____ | Code _____    | Code _____      | Code _____       |
| <b>9</b> Collection of specimen (i.e. blood, urine, stool, smear, swab, cerebrospinal fluid) | Code _____ | Code _____    | Code _____      | Code _____       |
| <b>10</b> Diagnostics – general laboratory diagnostics                                       | Code _____ | Code _____    | Code _____      | Code _____       |
| <b>11</b> Diagnostics – specific laboratory diagnostics, specify _____                       | Code _____ | Code _____    | Code _____      | Code _____       |
| <b>12</b> Diagnostics - general imaging                                                      | Code _____ | Code _____    | Code _____      | Code _____       |
| <b>13</b> Diagnostics - specific imaging, specify _____                                      | Code _____ | Code _____    | Code _____      | Code _____       |
| <b>14</b> Diagnostics - other, specify _____                                                 | Code _____ | Code _____    | Code _____      | Code _____       |
| <b>15</b> Treatment - general medication                                                     | Code _____ | Code _____    | Code _____      | Code _____       |
| <b>16</b> Treatment - specific medication, specify _____                                     | Code _____ | Code _____    | Code _____      | Code _____       |
| <b>17</b> Treatment - other medication, specify _____                                        | Code _____ | Code _____    | Code _____      | Code _____       |



Site \_\_\_\_\_ Subarea \_\_\_\_\_ House number \_\_\_\_\_

Interviewer ID \_\_\_\_\_

|                                                                                                                                                     |                                       |                                  |
|-----------------------------------------------------------------------------------------------------------------------------------------------------|---------------------------------------|----------------------------------|
| [1] YES, vaccinated                                                                                                                                 | [5] No, lack of vaccine               | [9] No, HCF busy                 |
| [2] No, caretaker busy                                                                                                                              | [6] No, child too old/young           | [10] No, child sick              |
| [3] No, caretaker decided no need                                                                                                                   | [7] No, caretaker refused/too worried | [11] No, no vaccination card     |
| [4] No, unknown where to go                                                                                                                         | [8] No, other, specify _____          | [99] Don't know [98] No response |
| <b>8.1 Diphtheria and Tetanus and Pertussis and <i>Haemophilus influenza</i> and Hepatitis B vaccine/DTwPHibHepB</b> (e.g. 6/8, 10/12, 14/16 weeks) |                                       |                                  |
| Code _____                                                                                                                                          | Code _____                            | Code _____                       |
| <b>8.2 Tetanus toxoid (TT)</b> (e.g. 1st contact pregnancy, 1, 6, 12/24 months)                                                                     |                                       |                                  |
| Code _____                                                                                                                                          | Code _____                            | Code _____                       |
| <b>8.3 Tetanus and diphtheria toxoid (TD)</b> (e.g. 1st contact pregnancy, 1, 6, 12 months)                                                         |                                       |                                  |
| Code _____                                                                                                                                          | Code _____                            | Code _____                       |
| <b>8.4 Tuberculosis/BCG</b> (at birth)                                                                                                              |                                       |                                  |
| Code _____                                                                                                                                          | Code _____                            | Code _____                       |
| <b>8.5 Rotavirus/RV</b> (e.g. 6/8, 10/12, 16 weeks)                                                                                                 |                                       |                                  |
| Code _____                                                                                                                                          | Code _____                            | Code _____                       |
| <b>8.6 Measles/Measles and Rubella (MR)</b> (e.g. 9, 15/18months)                                                                                   |                                       |                                  |
| Code _____                                                                                                                                          | Code _____                            | Code _____                       |
| <b>8.7 Polio/OPV</b> (e.g. birth, 6/8, 10/12, 14/16 weeks)                                                                                          |                                       |                                  |
| Code _____                                                                                                                                          | Code _____                            | Code _____                       |
| <b>8.8 Pneumococcus/PCV</b> (e.g. 6/8, 10/12, 14/16 weeks)                                                                                          |                                       |                                  |
| Code _____                                                                                                                                          | Code _____                            | Code _____                       |
| <b>8.9 Yellow fever (YF)</b> (e.g. 9 months)                                                                                                        |                                       |                                  |
| Code _____                                                                                                                                          | Code _____                            | Code _____                       |
| <b>8.10 Other Vaccines</b>                                                                                                                          |                                       |                                  |
| Specify, _____                                                                                                                                      | Specify, _____                        | Specify, _____                   |
| Specify, _____                                                                                                                                      | Specify, _____                        | Specify, _____                   |
| Specify, _____                                                                                                                                      | Specify, _____                        | Specify, _____                   |
| Specify, _____                                                                                                                                      | Specify, _____                        | Specify, _____                   |

Site \_\_\_\_\_ Subarea \_\_\_\_\_ House number \_\_\_\_\_ Interviewer ID \_\_\_\_\_

**DISEASE PERCEPTION**

**9 Knowledge, perception, causes and prevention of common infectious diseases**

| <b>Disease</b>          | <b>9.1 Disease known by household members?</b><br>[1] Yes<br>[2] No<br>[99] Don't know<br>[98] No response | <b>9.2 Perception of disease by household members?</b><br><i>Instruction: Describe briefly if known.</i> | <b>9.3 Causes for disease known by household members?</b><br><i>Instructions: Enter all codes (list A) that apply; more than one answer is possible.</i> | <b>9.4 Measures to prevent disease known by household members?</b><br><i>Instructions: Enter all codes (list B) that apply; more than one answer is possible.</i> | <b>9.5 Measures to prevent disease utilized by household members?</b><br><i>Instructions: Enter all codes (list B) that apply; more than one answer is possible.</i> |
|-------------------------|------------------------------------------------------------------------------------------------------------|----------------------------------------------------------------------------------------------------------|----------------------------------------------------------------------------------------------------------------------------------------------------------|-------------------------------------------------------------------------------------------------------------------------------------------------------------------|----------------------------------------------------------------------------------------------------------------------------------------------------------------------|
| <b>A. Typhoid fever</b> | Code _____                                                                                                 |                                                                                                          | Code _____                                                                                                                                               | Code _____                                                                                                                                                        | Code _____                                                                                                                                                           |
| <b>B. Cholera</b>       | Code _____                                                                                                 |                                                                                                          | Code _____                                                                                                                                               | Code _____                                                                                                                                                        | Code _____                                                                                                                                                           |
| <b>C. Malaria</b>       | Code _____                                                                                                 |                                                                                                          | Code _____                                                                                                                                               | Code _____                                                                                                                                                        | Code _____                                                                                                                                                           |
| <b>D. Influenza</b>     | Code _____                                                                                                 |                                                                                                          | Code _____                                                                                                                                               | Code _____                                                                                                                                                        | Code _____                                                                                                                                                           |
| <b>E. Meningitis</b>    | Code _____                                                                                                 |                                                                                                          | Code _____                                                                                                                                               | Code _____                                                                                                                                                        | Code _____                                                                                                                                                           |
| <b>F. Hepatitis E</b>   | Code _____                                                                                                 |                                                                                                          | Code _____                                                                                                                                               | Code _____                                                                                                                                                        | Code _____                                                                                                                                                           |
| <b>G. Tuberculosis</b>  | Code _____                                                                                                 |                                                                                                          | Code _____                                                                                                                                               | Code _____                                                                                                                                                        | Code _____                                                                                                                                                           |
| <b>H. HIV/AIDS</b>      | Code _____                                                                                                 |                                                                                                          | Code _____                                                                                                                                               | Code _____                                                                                                                                                        | Code _____                                                                                                                                                           |

| <b>List A: Possible causes</b>                                                                | <b>List B: Possible preventive measures</b>                                                                                                                       |
|-----------------------------------------------------------------------------------------------|-------------------------------------------------------------------------------------------------------------------------------------------------------------------|
| [1] Alcohol consumption<br>[2] Weather/witchcraft<br>[3] Mosquito/insect bite<br>[4] Dog bite | [1] No alcohol consumption<br>[2] Sleeping under bed net<br>[3] Using mosquito/insect spray<br>[4] Maintain a clean house and immediate surroundings of the house |

Site \_\_\_\_\_ Subarea \_\_\_\_\_ House number \_\_\_\_\_ Interviewer ID \_\_\_\_\_

|                                                                                                      |                                                                                                                              |
|------------------------------------------------------------------------------------------------------|------------------------------------------------------------------------------------------------------------------------------|
| [5] Drinking untreated surface/spring water (i.e. lake, pond, river, stream, canal/irrigation canal) | [5] Practice proper disposal of human and domestic waste                                                                     |
| [6] Close body contact/kissing/hugging                                                               | [6] Avoiding close contact to dogs                                                                                           |
| [7] Eating raw food items such as vegetables/lettuce, fruits, dairy products, eggs, meat or fish     | [7] Treating water (i.e. boiling, filtration, solar disinfection, sedimentation, chlorination)                               |
| [8] Not cleaning hands properly when preparing food/meals                                            | [8] Not cooking/preparing food/meals with untreated water                                                                    |
| [9] Not cleaning hands properly before/after visiting a toilet                                       | [9] Not washing food items to be consumed raw with untreated water                                                           |
| [10] Contact to human blood (i.e. injection, transfusion, surgery)                                   | [10] Re-boiling/re-heating left-over/prepared food/meals prior to consumption                                                |
| [11] Consuming raw animal blood                                                                      | [11] Not eating raw food items such as vegetables/lettuce, fruits, dairy products, eggs, meat or fish                        |
| [12] Other, specify _____                                                                            | [12] Cover food items/meals                                                                                                  |
| [99] Don't know                                                                                      | [13] Protect food items/meals from flies                                                                                     |
| [98] No response                                                                                     | [14] Avoid food/beverage from street vendors                                                                                 |
|                                                                                                      | [15] Avoid close contact to sick people                                                                                      |
|                                                                                                      | [16] No close body contact/kissing/hugging                                                                                   |
|                                                                                                      | [17] Covering nose/mouth while sneezing/coughing                                                                             |
|                                                                                                      | [18] No contact/consumption of human/animal blood                                                                            |
|                                                                                                      | [19] Practicing proper hand hygiene when preparing food/meals (i.e. washing hands with soap and water, rub hands clean)      |
|                                                                                                      | [20] Practicing proper hand hygiene before/after visiting a toilet (i.e. washing hands with soap and water, rub hands clean) |
|                                                                                                      | [21] Other, specify _____                                                                                                    |
|                                                                                                      | [99] Don't know                                                                                                              |
|                                                                                                      | [98] No response                                                                                                             |



Site \_\_\_\_\_ Subarea \_\_\_\_\_ House number \_\_\_\_\_

Interviewer ID \_\_\_\_\_

**10 For which members of this household are the preventive measures as listed in question 9.5 against typhoid fever used?***Instructions:* Tick all that applies; more than one answer is possible.

- 1=<2years       3= $\geq$ 5 to <15years       5=NOT USED       99=Don't know  
 2= $\geq$ 2 to < 5years       4= $\geq$ 15years       98=No response

**11 Name the household members that were diagnosed with typhoid fever during the past 3 months. Which diagnostics were used to confirm typhoid fever?***Instructions:* Enter all codes that apply for each household member; more than one answer is possible.

| Member 1<br>Initials/Identifier: _____ | Member 2<br>Initials/Identifier: _____ | Member 3<br>Initials/Identifier: _____                | Member 4<br>Initials/Identifier: _____ |
|----------------------------------------|----------------------------------------|-------------------------------------------------------|----------------------------------------|
| [1] Blood culture                      | [3] Blood/Widal test                   | [5] Not applicable (not diagnosed with typhoid fever) |                                        |
| [2] Stool culture                      | [4] Other test, specify _____          | [99] Don't know                                       | [98] No response                       |
| Code _____                             | Code _____                             | Code _____                                            | Code _____                             |

**12 (Where were members of this household recorded in question 11 diagnosed for typhoid fever?) Where did members of this household seek care?***Instructions:* Enter one code by household member only.

| Member 1<br>Initials/Identifier: _____ | Member 2<br>Initials/Identifier: _____ | Member 3<br>Initials/Identifier: _____ | Member 4<br>Initials/Identifier: _____ |
|----------------------------------------|----------------------------------------|----------------------------------------|----------------------------------------|
| [1] Healthcare facility, specify _____ | [6] Nowhere, did not seek care         |                                        |                                        |
| [2] Physician                          | [7] Other, specify _____               |                                        |                                        |
| [3] Nowhere, self-treatment            | [8] Not applicable                     |                                        |                                        |
| [4] Traditional healer                 | [99] Don't know                        |                                        |                                        |
| [5] Pharmacy                           | [98] No response                       |                                        |                                        |
| Code _____                             | Code _____                             | Code _____                             | Code _____                             |

**13 (Did members of this household that were diagnosed with typhoid fever as recorded in question 11 get any treatment?) Which treatment did they get?***Instructions:* Tick one answer by household member only.

| Member 1<br>Initials/Identifier: _____           | Member 2<br>Initials/Identifier: _____           | Member 3<br>Initials/Identifier: _____           | Member 4<br>Initials/Identifier: _____           |
|--------------------------------------------------|--------------------------------------------------|--------------------------------------------------|--------------------------------------------------|
| <input type="radio"/> 1=Treatment, specify _____ | <input type="radio"/> 1=Treatment, specify _____ | <input type="radio"/> 1=Treatment, specify _____ | <input type="radio"/> 1=Treatment, specify _____ |
| <input type="radio"/> 2=Not applicable           | <input type="radio"/> 2=Not applicable           | <input type="radio"/> 2=Not applicable           | <input type="radio"/> 2=Not applicable           |
| <input type="radio"/> 99=Don't know              | <input type="radio"/> 99=Don't know              | <input type="radio"/> 99=Don't know              | <input type="radio"/> 99=Don't know              |
| <input type="radio"/> 98=No response             | <input type="radio"/> 98=No response             | <input type="radio"/> 98=No response             | <input type="radio"/> 98=No response             |

Site \_\_\_\_\_ Subarea \_\_\_\_\_ House number \_\_\_\_\_

Interviewer ID \_\_\_\_\_

**FORM 5: ASSESSMENT OF OVERALL, AGE-AND SEX-STRATIFIED ACTUAL HEALTHCARE UTILIZATION**

**HEALTHCARE SEEKING BEHAVIOR**

**1 Record below any occurrence of a sign(s)/ a symptom(s) (see List 1) and specify where (see List 2) and how often a member/members sought healthcare during the past 3 months?**

*Instructions:* See "Form 3 - Part A - GENERAL HOUSEHOLD INFORMATION" to obtain the initials/identifier of each household member. Indicate one sign/symptom per line only. Start a new line if different healthcare options were selected for recurring signs/symptoms. Indicate the number of occurrences for each sign/symptom during the past 3 months. If a different healthcare option was taken for a recurring sign/symptom, indicate this on a new line. Please complete an additional form if >20 occurrences took place during the past 3 months.

| List 1:<br>Sign/Symptom                  |                                                     | List 2:<br>Healthcare option                                                                                                                                                 |
|------------------------------------------|-----------------------------------------------------|------------------------------------------------------------------------------------------------------------------------------------------------------------------------------|
| [A] Fever, any                           | [N] Nausea/ Vomiting                                | [1] Study-HCF,<br>Code _____<br>[2] Other HCF,<br>Code _____<br>[3] Physician<br>[4] Pharmacy<br>[5] Traditional healer<br>[6] Nowhere/Self-treatment<br>[7] Nowhere/Nothing |
| [B] Fever <3days (continuous)            | [O] Diarrhea (watery/bloody/mucopurulent)           |                                                                                                                                                                              |
| [C] Fever ≥3days (continuous)            | [P] Abdominal pain/ Intestinal pain                 |                                                                                                                                                                              |
| [D] Chills/ Shivering                    | [Q] Blood loss/ Bleeding (internal)                 |                                                                                                                                                                              |
| [E] Convulsion                           | [R] Blood loss/ Bleeding (external)                 |                                                                                                                                                                              |
| [F] Weight loss                          | [S] Sneezing/ Runny nose                            |                                                                                                                                                                              |
| [G] Dehydration                          | [T] Cough                                           |                                                                                                                                                                              |
| [H] Malaise/ Weakness/ Fatigue           | [U] Rapid breathing/ Shortness of breath            |                                                                                                                                                                              |
| [I] Aches/Pain (muscle/joint/bone)       | [V] Severe breathing/ Difficulties in breathing     |                                                                                                                                                                              |
| [J] Headache                             | [W] Skin inflammation (rashes/redness/ pus/itching) |                                                                                                                                                                              |
| [K] Dizziness/Confusion/ Unconsciousness | [X] Swelling/ Edema                                 |                                                                                                                                                                              |
| [L] Blood pressure disorders             | [Y] Jaundice                                        |                                                                                                                                                                              |
| [M] Heart disorders                      |                                                     |                                                                                                                                                                              |

| No. | Household member<br>Record the initials/identifier of a household member; see "Form 3 - Part A - GENERAL HOUSEHOLD INFORMATION" | Sign/<br>Symptom<br>Use List 1 to select a code | Healthcare option           |          | Frequency<br>Indicate the number of incidences for the sign/symptom listed |
|-----|---------------------------------------------------------------------------------------------------------------------------------|-------------------------------------------------|-----------------------------|----------|----------------------------------------------------------------------------|
|     |                                                                                                                                 |                                                 | Use List 2 to select a code | HCF code |                                                                            |
| 1   |                                                                                                                                 |                                                 |                             |          |                                                                            |
| 2   |                                                                                                                                 |                                                 |                             |          |                                                                            |
| 3   |                                                                                                                                 |                                                 |                             |          |                                                                            |
| 4   |                                                                                                                                 |                                                 |                             |          |                                                                            |
| 5   |                                                                                                                                 |                                                 |                             |          |                                                                            |
| 6   |                                                                                                                                 |                                                 |                             |          |                                                                            |
| 7   |                                                                                                                                 |                                                 |                             |          |                                                                            |
| 8   |                                                                                                                                 |                                                 |                             |          |                                                                            |
| 9   |                                                                                                                                 |                                                 |                             |          |                                                                            |

Site \_\_\_\_ Subarea \_\_\_\_ House number \_\_\_\_ Interviewer ID \_\_\_\_

|    |  |  |  |  |  |
|----|--|--|--|--|--|
| 10 |  |  |  |  |  |
| 11 |  |  |  |  |  |
| 12 |  |  |  |  |  |
| 13 |  |  |  |  |  |
| 14 |  |  |  |  |  |
| 15 |  |  |  |  |  |
| 16 |  |  |  |  |  |
| 17 |  |  |  |  |  |
| 18 |  |  |  |  |  |
| 19 |  |  |  |  |  |
| 20 |  |  |  |  |  |

For peer review only

1  
2  
3  
4  
5  
6  
7  
8  
9  
10  
11  
12  
13  
14  
15  
16  
17  
18  
19  
20  
21  
22  
23  
24  
25  
26  
27  
28  
29  
30  
31  
32  
33  
34  
35  
36  
37  
38  
39  
40  
41  
42  
43  
44  
45  
46  
47  
48  
49  
50  
51  
52  
53  
54  
55  
56  
57  
58  
59  
60

## Appendix 3/Supplementary file 3: Protocol, Definitions/Terminology and Study Forms (French)

### Protocol

#### **Le protocole d'étude HPAfrica: Évaluation du comportement de santé et des facteurs démographiques socio-économiques, comportement d'hygiène - une étude standardisée répétée transversale dans plusieurs cohortes en Afrique subsaharienne**

### Abstrait

**Introduction** L'objectif de l'étude HPAfrica est de déterminer les comportements sanitaires et facteurs démographiques, y compris les facteurs socio-économiques, ethnographiques aussi bien que d'hygiène et d'assainissement, sur les sites d'étude du programme Fièvre Typhoïde Sévère en Afrique (SETA). L'objectif du programme SETA est d'enquêter sur la surveillance de la fièvre au niveau des établissements de soins de santé au Burkina Faso, en République Démocratique du Congo, en Éthiopie, au Ghana, à Madagascar et au Nigéria. Les estimations précises de la charge de morbidité nécessitent un ajustement des styles de comportements de santé, qui sont supposés varier au sein d'une population d'étude.

**Methodes et Analyses** Pour la taille d'échantillon minimale d'interviews de ménages requise, les hypothèses d'une population infinie, d'un effet de design et d'une stratification par âge et par sexe sont considérées. En l'absence d'un cadre d'échantillonnage de la population ou d'une liste de ménages, une approche spatiale sera utilisée pour générer des points aléatoires géographiques avec un outil ArcGIS (Aeronautical Reconnaissance Coverage Geographic Information System). Les impressions de l'imagerie satellite de Google Earth Pro® visualisent ces points. Les données d'intérêt seront évaluées au niveau des ménages en différentes saisons en appliquant un échantillonnage stratifié en fonction de la population. Une application basée sur Android et un service Web sera développé pour la capture de données électroniques et la synchronisation avec le serveur de base de données sur Internet en temps réel. Les poids d'échantillonnage seront calculés pour tenir compte des différences possibles dans les probabilités de sélection. Des analyses de données descriptives seront effectuées afin d'évaluer l'informations de base de chaque population étudiée et le comportement santé stratifié par âge et par sexe. Ceci permettra d'ajuster les estimations de la charge de morbidité. En outre, des analyses multivariées seront appliquées pour examiner les associations entre le comportement santé, les facteurs démographiques et le fardeau de la maladie trouvée dans l'étude SETA.

### Ethique et diffusion

Les approbations éthique pour ce protocole ont été reçues par l'International Vaccine Institute (IVI, n° 2016-0003) et par toutes les institutions collaboratrices des pays participants. Il est prévu de diffuser les résultats de cette étude par publication dans un journal révisé par des pairs.

### Les forces et les limites de cette étude

- La normalisation dans la recherche multi-pays /-site à base communautaire nécessite de la prudence compte tenu des variations de cadre, de langue et de culture.
- Les évaluations de santé publique à grande échelle complèteront les données sur la charge de morbidité en étudiant les sources de transmission et d'infection.
- Les données de population actuelles dans les sites d'étude et leurs sous-zones définies administrativement et les bases de sondage de population sont supposées être limitées.
- La collecte de données électroniques peut entraîner problèmes techniques liés aux dommages, aux pannes fonctionnelles ou à la perte de dispositifs.
- Une connexion Internet sans fil instable peut limiter les équipes de données à mettre à jour l'application basée sur Android, communiquer en temps réel avec les responsables de l'étude et à synchroniser les données collectées avec le serveur.

**Inscription:** non requise

**Mots clés:** comportement santé/hygiénique, assainissement, socio-économique, cadre d'échantillonnage de la population/l'échantillonnage spatiale, Afrique subsaharienne, HPAfrica étude

## Contexte

L'évaluation du comportement de santé, y compris l'utilisation des soins de santé, est un déterminant important pour la production d'estimations précises du fardeau de la maladie parmi les populations cibles. Ceci est particulièrement important pour les études qui utilisent un modèle de surveillance observationnelle basé sur les établissements de santé, car une variation substantielle des comportements de santé influence fortement les estimations de la maladie (1). L'ajustement des calculs de la maladie pour des variations du comportement de santé augmentera l'exactitude de l'évaluation des mesures de la fréquence des maladies causées par des pathogènes bactériens, fongiques, viraux ou parasitaires parmi les populations étudiées. De plus, l'influence d'une grande variété de facteurs basés sur la population sur le comportement de santé et le fardeau de la maladie a été reconnue. Cela inclut des facteurs socioéconomiques tels que l'éducation, la profession, le revenu, la disponibilité des biens des ménages (2, 3), les facteurs ethniques / religieux et culturels (4, 5), mais aussi l'hygiène et l'assainissement (6-10), la manipulation des aliments (11-14) et les contacts avec des animaux (9).

L'étude **Health Population Africa** (HPAfrica) sera menée au Burkina Faso, en République démocratique du Congo (RDC), en Éthiopie, au Ghana, à Madagascar et au Nigéria. Les expériences du programme Typhoid Fever Surveillance in Africa Program (TSAP) seront reportées sur le programme Severe Typhoid in Africa (SETA) (15, 16). Dans ce programme, une surveillance standardisée de la fièvre, basée sur les établissements de santé, est effectuée sur des sites d'étude sélectionnés dans les pays participants sur une période de deux ans (17). SETA vise principalement à collecter systématiquement des informations sur le fardeau des infections graves à *Salmonella*. Les sujets vivant dans la zone de chalandise définie, avec un épisode de fièvre aiguë, des antécédents de fièvre  $\geq 3$  jours consécutifs, une fièvre typhoïde cliniquement soupçonnée ou des perforations gastro-intestinales cliniquement diagnostiquées dues à la fièvre typhoïde seront éligibles. En outre, la sévérité des maladies provoquées par *Salmonella* et l'histoire naturelle de l'infection à *Salmonella* seront enregistrées avec des analyses supplémentaires sur les réponses immunitaires de l'hôte et le portage chronique.

## Objectifs et Résultats

L'objectif de l'étude HPAfrica est d'évaluer le comportement de santé générique et réel stratifié par âge et par sexe. Le comportement générique se rapporte au comportement associé à la fièvre et à d'autres signes et symptômes sans l'apparition, alors que le comportement réel est lié à l'apparition (Formulaire 4 Partie A, Formulaire 5). Les données sont utilisées pour ajuster les mesures de l'occurrence de la maladie comme l'incidence d'agents pathogènes infectieux stratifiés selon l'âge et le sexe pour la proportion d'une population étudiée non capturée dans le programme de surveillance SETA. Les données documentaires pour divers signes et symptômes ou une combinaison de ceux-ci sont utilisés pour une classification progressive de l'utilisation des soins de santé en fonction de la gravité de la maladie.

L'étude HPAfrica recueillera des données sur les facteurs associés aux soins de santé, tels que les modalités de voyage, la possession d'une assurance maladie, les facteurs culturels/ethnographiques, l'état vaccinal des enfants (18, 19) et la fréquence et la perception individuelle des maladies (Formulaire 4 Partie B). Les données démographiques (Formulaire 3 Partie A) seront utilisées pour la stratification par âge et par sexe de la population étudiée qui est nécessaire pour calculer les facteurs d'ajustement pour les mesures de l'occurrence de la maladie. Les données socio-économiques (Formulaire 3 Partie B) seront utilisées pour calculer les indices de richesse pour les approches descriptives et analytiques. Les informations sur l'hygiène et l'assainissement (Formulaire 3 Partie C) peuvent permettre une meilleure compréhension de l'occurrence et de la fréquence des agents pathogènes identifiés parmi les populations étudiées.

## Méthodes

### Sites d'étude

Les limites de chaque site seront définies en utilisant des indications préexistantes qui avaient été déterminées par les autorités statistiques ou ministères de la santé (Tableau 1), couplées à des données géospatiales à haute résolution de source ouverte. L'examen rétrospectif des registres de des deux dernières années aux établissements de soins de santé de recrutement SETA permettra de redéfinir les limites du site. On s'attend à ce que cette revue révèle les résidences ou au moins les zones résidentielles administratives plus larges telles que des communautés, des districts ou des villages de patients qui ont cherché des soins de santé pour une raison quelconque. Des cartes et des images satellites peuvent être utilisées pour mieux visualiser les résidences des patients et les limites générales, y compris les sous-zones définies géographiquement ou administrativement, les secteurs de recensement ou les strates de chaque site. Là où les limites ne peuvent être clairement définies, des facteurs supplémentaires, tels que la distance à un établissement de soins de santé de recrutement, peuvent être pris en compte.

### Taille d'échantillons

Toutes les sources disponibles seront utilisées pour recueillir des données sur la population le plus à jour stratifiées selon l'âge et le sexe par site d'étude et par les sous-zones définies administrativement ou géographiquement ou les strates. Les strates seront définies comme la plus petite unité administrative publiée par le recensement d'un pays participant. Les ménages dans les strates devraient être répartis de manière homogène. Les sources de données sur la population pour les dénombrements par strate <sup>cela</sup> peut inclure les dernières informations démographiques issues d'un recensement d'un total de la population ou d'un DSS (Demographic Surveillance System) / HDSS (Health and Demographic Surveillance System). Les chiffres sommaires sur la population et les facteurs de croissance de la population, s'ils sont disponibles, peuvent constituer une source de données supplémentaire. Pour les sites avec des chiffres de population obsolètes ou indisponibles, des outils d'échantillonnage en accès libre couplés à des sources de données sur la population, comme les données sur la population quadrillée basées sur la densité de WorldPop peuvent également être utilisés (20-25).

Toutes les strates par site d'étude seront incluses. Un ménage tel que défini pour l'étude HPAfrica constitue l'unité d'échantillonnage primaire (PSU). Le nombre minimum de ménages sélectionnés au hasard sera calculé en utilisant l'équation basée de précision (équation-I) en supposant une population infinie et en considérant un effet de design (DEFF) (26-28), y compris les hypothèses qui l'accompagnent:

#### Equation-I: Calcul de la taille d'échantillon basé sur la précision par site d'étude pour une population infinie (26-32)

$$n_0 = DEFF \cdot \left[ z_{1-\alpha/2}^2 \cdot \frac{4 \cdot p \cdot (1-p)}{d^2} \right]$$

##### Hypothèses d'Equation-I

|                          |                                                                                                                                                                                                                                                                                  |
|--------------------------|----------------------------------------------------------------------------------------------------------------------------------------------------------------------------------------------------------------------------------------------------------------------------------|
| $n_0$                    | Nombre minimum total de ménages à interroger dans une zone d'étude en supposant une population infinie                                                                                                                                                                           |
| $DEFF$                   | Effect de design; fixé à 1.5<br>≤1.0=negative correlation of the outcome(s) of interest between household members; 1.0=no correlation of the outcome(s) of interest between household members; ≥1.0=positive correlation of the outcome(s) of interest between household members |
| $z_{1-\frac{\alpha}{2}}$ | Déviations Standard correspondant à un intervalle de confiance de 95% (1.96 pour alpha de 0.05)                                                                                                                                                                                  |
| $d$                      | Précision (erreur acceptable); estimation de point; fixé à 0.2                                                                                                                                                                                                                   |
| $p$                      | Proportion de la population de l'étude devant se rendre dans un établissement de soins de santé de recrutement pour des conditions associées à de la fièvre et d'autres signes et symptômes (proportion capturée); fixé à 0.2                                                    |
| $1-p$                    | Proportion de la population de l'étude ne devant se rendre dans un établissement de soins de santé de recrutement pour des conditions associées à de la fièvre et d'autres signes et symptômes (proportion non capturée)                                                         |

L'effet de design est défini comme un facteur d'ajustement pour le regroupement naturel des comportements de santé comme principal résultat d'intérêt parmi les membres du ménage. Il rend compte d'une plus grande variance statistique et, par conséquent, d'une plus faible précision par rapport à l'échantillonnage aléatoire simple (15, 30, 33, 34). Pour HPAfrica, le DEFF peut être fixé de manière conservatrice à 1,5 sur la base d'une estimation de 1,42 résultant d'une taille moyenne de ménage de sept et d'un coefficient de corrélation intracluster (ICC) de 0,07 provenant de l'étude TSAP (15, 31, 32, 35). Une proportion  $p$  de 0,2 pourra être considérée si aucune autre estimation n'est disponible ou  $p$  peut être basé sur des informations plus précises disponibles par site ou sur les expériences au cours de l'étude TSAP (Tableau 2): Madagascar, Isotry :  $p=0,01$ , Burkina Faso, Polesgo:  $p=0,9$  (36). Combiner tous les hypothèses dans l'équation-I va avoir pour résultat un nombre global minimum ( $n_0$ ) de 92 ménages à interroger par site.

En outre,  $n_0$  pourra être pris en compte pour la répartition par âge et par sexe de chaque population de l'étude représentée par  $q$ , la proportion minimum supposée de stratification par groupe d'âge (<5 ans, ≥5 à <15 ans, ≥15 ans). Le facteur  $q$  pourra être défini de façon arbitraire à 0,2 ou être basé sur les expériences précédentes: Éthiopie, Butajira :  $q = 0,09$ , Burkina Faso, Polesgo :  $q = 0,23$  (15). Appliquer  $q$  à l'Equation-I pour une distribution binomiale, y compris ses postulats connexes, aura pour résultat le nombre minimum de ménages à interroger ( $\bar{n}_0$ ) de 461 stratifié selon l'âge (Equation-II):

**Equation-II: Calcul de la taille d'échantillon basé sur la précision par site d'étude pour une population infinie avec stratification selon l'âge et population-poids par sous-zone ou strate:**

$$\bar{n}_0 = \left( DEFF \cdot \left[ z^2_{1-\frac{\alpha}{2}} \cdot \frac{4 \cdot p \cdot (1-p)}{d^2} \right] \right) / q \quad \bar{n}_{ow} = \bar{n}_0 \cdot (n/N)$$

Hypothèses d'Equation-II

|                          |                                                                                                                                                                                                                               |
|--------------------------|-------------------------------------------------------------------------------------------------------------------------------------------------------------------------------------------------------------------------------|
| $\bar{n}_0$              | Nombre total minimum de ménages à interroger dans une zone d'étude en supposant une population infinie et une stratification selon l'âge                                                                                      |
| $\bar{n}_{ow}$           | Minimum number of households to be interviewed by subarea or stratum                                                                                                                                                          |
| $n/N$                    | Population size of subarea or stratum divided by the population size of the total study area                                                                                                                                  |
| <i>DEFF</i>              | Effect de design; fixé à 1.5                                                                                                                                                                                                  |
| $z_{1-\frac{\alpha}{2}}$ | Déviation Standard correspondant à un intervalle de confiance de 95% (1.96 pour alpha de 0.05)                                                                                                                                |
| $d$                      | Précision (erreur acceptable); estimation de point; fixé à 0.2                                                                                                                                                                |
| $p$                      | Proportion de la population de l'étude devant se rendre dans un établissement de soins de santé de recrutement pour des conditions associées à de la fièvre et d'autres signes et symptômes (proportion capturée); fixé à 0.2 |
| $1 - p$                  | Proportion de la population de l'étude ne devant se rendre dans un établissement de soins de santé de recrutement pour des conditions associées à de la fièvre et d'autres signes et symptômes (proportion non capturée)      |
| $q$                      | Proportion minimum de stratification par groupe d'âge, définie à 0,2                                                                                                                                                          |

Les comportements de santé seront évalués deux fois dans les mêmes ménages si possible ou dans des ménages alternatifs, au cas où la population de l'étude serait instable en raison de la migration et / ou de taux de natalité / mortalité élevés. Des ménages supplémentaires, supposés être de 20% en moyenne (Tableau 2), peuvent être ajoutés pour tenir compte de la possible perte de suivi entre les deux évaluations. Eventuellement, l'échantillonnage stratifié pondéré en fonction de la population selon la proportion de la population des strates ( $n/N$ ) pour tenir compte de la probabilité inégale de sélection due à la répartition hétérogène des populations entre les strates (poids de la population ( $n/N$ ) par strat) sera appliqué à  $\bar{n}_0$  de 553 (37, 38).

### **Echantillonnage avec et sans cadre d'échantillonnage de population**

Si une base d'échantillonnage de la population ou une liste de ménages compréhensif et à jour existe par DSS / HDSS ou recensement (39, 40), une sélection aléatoire informatisée des ménages en tant que PSU sera effectuée en utilisant SAS (Système d'analyse statistique, version 9.4, SAS Institute, Cary NC) en appliquant une sélection aléatoire simple en série sans remplacement pondéré selon la proportion de la population des strates ( $n/N$ ). Les ménages sélectionnés avec des identifiants sont visualisés en utilisant des DDS / HDSS ou des outils de recensement. En cas de refus, d'absence d'un répondant ou de localisation d'un ménage abandonné, les enquêteurs sont formés pour visiter un ménage alternatif le plus proche de la côte droit ou gauche d'un ménage d'origine. Cela suit le principe de la proximité la plus proche comme vu dans la recherche précédente (41-44). Pour limiter, en outre, les probabilités de sélection inégale, donc les probabilités de sélection par les enquêteurs, nous présélectionnons un nombre arbitraire de cinq ménages alternatifs d'échantillonnage de population qui doivent être plus proches du ménage d'original plutôt que de demander par exemple une sélection en base de loterie ou une sélection dans le sens des aiguilles d'une montre (37, 41, 44). En outre, la notation de l'un (=le plus proche) à cinq (=le plus éloigné) est appliquée aux ménages alternatifs et les enquêteurs sont invités à suivre strictement la séquence de notation au cours de la procédure de sélection du ménage. La conformité des enquêteurs avec les règles de sélection des ménages originaux et alternatifs sera vérifiée quotidiennement. Les écarts seront étudiés et une formation complémentaire sera fournie aux enquêteurs au besoin.

S'il n'existe pas de cadre d'échantillonnage de la population, nous appliquerons une technique d'échantillonnage spatial stratifié pondérée par la population de proportion ( $n/N$ ) (37). Guidés par des recherches antérieures, des points spatiaux aléatoires sont générés à l'aide de l'outil de génération de points aléatoires ArcGIS (Aeronautical Reconnaissance Coverage Geographic Information System, Redlands, CA, USA, version 10.2) (21, 23, 37, 40, 43, 45-51). L'outil place de la manière aléatoire des nombres spécifiés de points dans les entités d'un polygone correspondant à une sous-zone administrative ou à une strate. Les coordonnées X et Y définissent un point jusqu'à ce que la taille d'échantillon calculée par strate soit atteinte. Les points générés par ArcGIS sont convertis en un fichier image au format KML (Keyhole Markup Language) ou KMZ (Keyhole Markup language Zipped) et importés dans Google Earth Pro®. Un identifiant numérique unique et des coordonnées géographiques sont affectés à chaque point. L'annexe 4 illustre notre approche en utilisant des exemples du Ghana et de Madagascar. Les points spatiaux étiquetés avec des identifiants sont représentés sur des impressions de la taille d'une affiche de (60 x 60 à 60 x 90 cm) d'images satellite Google Earth Pro avec une haute résolution ou alternativement en utilisant une application de source ouverte pour la navigation et la cartographie automatiques hors ligne / en ligne pour localiser les points sélectionnés sur le terrain. Des récepteurs GPS (Global Positioning System) portables (Garmin-eTrex, Garmin Ltd., Lenexa, KS, USA) aident à vérifier les emplacements. Les récepteurs seront positionnés près d'un point localisé, dans une position statique et en plein air pour assurer une lecture sans obstacle. Les enquêteurs évaluent les points spatiaux de la présence d'un ménage en tant que PSU (24). En cas de refus, d'absence du répondant ou de localisation d'un point non résidentiel, les enquêteurs sont formés pour visiter un point spatial alternatif présélectionné le plus proche de la droite ou de la gauche d'un point original et l'évaluer pour la présence d'un ménage (41-43, 52). Pour limiter les chances de probabilité de sélection inégale, nous présélectionnons au moins cinq points spatiaux alternatifs à proximité immédiate du point d'origine qui représentent une structure de taille appropriée et de forme rectangulaire ou carrée à partir de l'imagerie satellite Google Earth Pro outil de mesure de distance. Comme pour les sites ayant un cadre d'échantillonnage de la population, la notation d'un à cinq est appliquée aux points spatiaux alternatifs et les enquêteurs doivent suivre la séquence de notation. La conformité des enquêteurs avec les règles de sélection des ménages originaux et alternatifs sera vérifiée quotidiennement. Les écarts seront étudiés et une formation complémentaire sera fournie aux enquêteurs au besoin. Dans le cas où un point spatial est placé dans l'équidistance de deux structures (ou plus), l'intervieweur saute le point spatial original et choisit un point spatial alternatif présélectionné suivant la séquence de notation. Dans le cas où deux points spatiaux originaux (ou plus) sont placés sur la même structure, l'intervieweur évalue la structure de la présence d'un ménage et choisit un second point spatial alternatif (ou plus) présélectionné après la séquence de notation.



1  
2  
3 Indépendamment de la présence ou de l'absence d'un cadre d'échantillonnage de la population, un ménage  
4 unifamilial à un étage sera directement contacté pour participer à l'étude. Cependant, un ménage  
5 seulement est inscrit dans une structure multifamiliale à un seul étage selon les procédures suivantes :  
6 l'enquêteur entre dans la structure et évalue le nombre total de ménage : le premier ménage du côté droit  
7 / gauche (selon la construction intérieure) de la structure est approché ; si le premier ménage ne participe  
8 pas, le second ménage du côté droit / gauche de la même structure est approché. L'enquêteur continue  
9 jusqu'à ce qu'un ménage par structure soit inscrit. De même, un ménage seulement est inscrit dans une  
10 structure multifamiliale à plusieurs étages. Après avoir évalué le nombre total de ménage présents,  
11 l'enquêteur se rapproche du premier ménage ne participe pas, le deuxième ménage le plus proche de  
12 l'entrée sur le même étage / suivant (en fonction de la construction intérieure) est approché ; l'enquêteur  
13 continue jusqu'à ce qu'un ménage par structure soit inscrit. L'enquêteur choisit un point spatial alternatif  
14 présélectionné après la séquence de notation au cas où aucun ménage ne peut être inscrit.  
15

### 16 **Fréquence de la collecte de données**

17 Les points résidentiels seront visités deux fois pour des entrevues au cours du programme SETA pour  
18 prendre en compte un possible impact lié à la saison, sur le comportement sanitaire (53-57). Les enquêtes  
19 auront lieu à différentes saisons - une à la fin de la saison sèche ou au moins un mois après son début et  
20 une vers la fin de la saison des pluies ou au moins un mois après son début (Tableau 3). Actuellement,  
21 l'étude HPAfrica est en cours au Burkina Faso, au Ghana et à Madagascar et devrait se poursuivre dans les  
22 autres pays au cours des prochains mois.  
23

### 24 **Critères d'inclusion et d'exclusion**

25 Les membres du ménage de tout âge et des deux sexes qui vivent dans la zone d'étude au jour de l'interview  
26 seront éligibles pour l'inclusion. Un ménage sera exclu si le répondant désigne refuse de participer ou n'est  
27 pas disponible après trois visites consécutives. Tous les visiteurs et individus dont le lieu de résidence n'est  
28 pas connu ou est en-dehors de la zone d'étude seront exclus.  
29

30 Pour raison de cette enquête, un ménage est défini comme une personne ou un groupe de personnes  
31 apparentées ou non apparentées vivant dans la même unité d'habitation, reconnaissant un individu adulte  
32 comme chef du ménage, partageant les mêmes installations domestiques, et subvenant indépendamment  
33 à leurs besoins en termes de nourriture et des autres éléments essentiels pour vivre (36).  
34

35 L'interview aura lieu exclusivement avec le répondant, qui est un membre adulte du ménage à l'âge de  
36 majorité légale spécifique au pays. Cette personne peut être identifiée comme décideur par les membres  
37 du même ménage et sert de substitut pour un ménage entier (15). D'autres définitions pertinentes sont  
38 expliquées subséquemment.  
39

### 40 **Collecte de données**

41 Les intervieweurs de site recevront une formation sur la localisation des points géographiques,  
42 l'identification des répondants, les procédures de consentement éclairé en mettant l'accent sur la  
43 participation volontaire, et sur le déploiement de formulaires d'étude standardisés et pré-testés avant le  
44 lancement de HPAfrica (58). Les formulaires de consentement éclairé et d'étude seront traduits dans la  
45 langue officielle du pays par deux traducteurs bilingue indépendants parlant couramment l'anglais et les  
46 locuteurs natifs de la langue cible qui connaissent le concept et la terminologie des formulaires. Les deux  
47 traductions seront comparées pour les divergences avec les traducteurs et un coordinateur, et un consensus  
48 sera recherché. La traduction avancée synthétisée sera traduite et traduite de la langue cible vers l'anglais  
49 par deux traducteurs indépendants, aveugles aux formes originales. Un consensus sur les écarts de  
50 traduction et les formulaires originaux seront recherchés avec les traducteurs et un coordinateur. Les  
51 formes traduites feront l'objet d'un test pilote parmi un échantillon de commodité des ménages de la  
52 population cible avant leur finalisation pour assurer la compréhensibilité interculturelle et l'équivalence  
53 sémantique, idiomatique, expérientielle et conceptuelle. Un rapport de traduction sera préparé (58-60).  
54

### 55 **Gestion de données**

1  
2  
3 La gestion des données dépendra du mode de collecte, qui sera principalement électronique plutôt que sur  
4 support papier. Les expériences passées ont montré les inconvénients suivants de la collecte de données  
5 sur papier: une forte probabilité d'erreurs lors du remplissage des formulaires d'étude, et le besoin de  
6 numérisation des données, qui est une étape supplémentaire, laborieuse, qui consomme du temps et  
7 sujette aux erreurs. La capture des données électroniques à l'aide d'une application pour un appareil mobile,  
8 comme un smartphone ou une tablette, réduit ces facteurs limitants à la qualité des données.  
9

10 Il peut y avoir une période pilote au cours de laquelle des données sur support papier et sans papier seront  
11 collectées avant la mise en œuvre complète de la collecte de données électroniques. Ce dernier utilise  
12 l'application Android « HPA Collect » (Google Android 5.0.1 9API 23, disponible à l'adresse  
13 <https://play.google.com/store/apps/details?id=anint.ivi.hpa>) et la plate-forme « HPA Web » (CSS,  
14 JavaScript et JSP, disponible sur <http://hpa.ivi.int/>), qui sont accompagnés d'un dictionnaire de variables  
15 contenant les codes, la signification et les propriétés des variables au moins en anglais et en français. Les  
16 deux, « HPA Collect » et « HPA Web », seront conçus spécifiquement pour les besoins de cette étude.  
17 L'expertise d'IVI en ingénierie informatique permet la construction fondamentale, la configuration et le  
18 développement des composants nécessaires. Différent de nombreux programmes de source ouverte, une  
19 fonction d'installation serveur permet le stockage de toutes les données originales collectées sur le serveur  
20 institutionnel en plus des fonctionnalités supplémentaires pour la vérification des erreurs profondes, les  
21 relations logiques entre variables et formulaires, les fonctions de recherche et l'analyse des données  
22 collectées. Une connectivité Internet sans fil stable utilisant des navigateurs par défaut est nécessaire pour  
23 assurer une synchronisation simultanée, attribuable, originale et précise des données entre « HPA Collect »  
24 et « HPA Web ». L'accès à « HPA Collect » et « HPA Web » est protégé par un mot de passe. L'annexe 5  
25 affiche le diagramme du système, qui a les caractéristiques suivantes:  
26

#### 27 **Structure ou fonctionnalités de « HPA Collect »**

- 28 • **Gestion des utilisateurs:** Une interface utilisateur simple fournit différents privilèges aux  
29 utilisateurs pour entrer, modifier (sauf pour les étiquettes d'étude) et exporter ou transférer  
30 des données. Il établit une piste d'audit qui enregistre lorsque les utilisateurs entrent des  
31 données dans le serveur.
- 32 • **Saisie de données:** Les données sont entrées directement dans le smartphone ou la tablette.  
33 Les champs de saisie limitent les réponses possibles à des réponses plausibles uniquement en  
34 offrant différentes méthodes de saisie:
  - 35 ▪ Modifier le texte: texte libre
  - 36 ▪ Groupe radio / bouton Multi-clic: choix unique (radio group/Multi click button)
  - 37 ▪ Case à cocher: choix multiple
  - 38 ▪ Sélecteur de date et d'heure: date et heure d'entrée
  - 39 ▪ Spinner: bouton déroulant

40 Des fonctionnalités supplémentaires permettent à l'enquêteur de gagner du temps en  
41 transférant les données collectées plus tôt aux champs de données requis à un stade ultérieur  
42 de l'interview en effectuant des vérifications de vraisemblance pour divers champs de saisie de  
43 données et en reconnaissant facilement les modèles de saut. Les vérifications d'erreurs, les  
44 notifications de données manquantes, les erreurs de code et les erreurs logiques sont  
45 également incluses.

- 46 • **Vue des données:** Les données brutes entrées à l'origine peuvent être vues dans le même  
47 format lisible par l'homme et la machine, à savoir le format JSON, étant donné qu'elles seront  
48 transférées vers un serveur de base de données (Windows, MySQL). Des fonctions  
49 supplémentaires telles que «effacer» pour effacer tous les enregistrements, «réinitialiser» pour  
50 revenir à la page de vue de données principale, et «rechercher» pour rechercher une étiquette  
51 d'étude sont disponibles.
- 52 • **Exporter :** Toutes les données entrées seront envoyées au serveur IVI via une connexion  
53 Internet sans fil. Chaque enregistrement de formulaire ayant une étiquette d'étude unique du  
54 ménage inscrit est transformé en une requête d'insertion SQL et inséré sur le serveur  
55

- uniquement s'il n'y a pas d'étiquette d'étude en double trouvée. L'insertion de données sera ignorée dans le cas d'étiquettes d'étude dupliquées.
- **Exporter ers local** : Tous les données entrées seront sauvegardées trois fois dans un dossier de stockage public de l'appareil mobile au format JSON et txt. Les fichiers txt contiennent des données de chaque formulaire individuel. Une version de fichiers JSON contient des données par chaque formulaire individuel et une deuxième version de fichiers JSON contient toutes les données d'un ménage inscrit. Les données au format JSON peuvent être extraites par USB ou connexion Internet sans fil.
  - **Rapport** : Cette fonctionnalité permet à un utilisateur de signaler toute requête à l'administrateur principal de « HPA Collect » à IVI par e-mail ou par une application tierce.
  - **Paramètres**: la possibilité de changer la langue du système entre l'anglais et le français est fournie.
  - **À propos de**: La version actuellement installée de «HPA Collect» est affichée.

#### Structure ou caractéristiques de « HPA Web »

- **Accueil**: une introduction à la plateforme est donnée et un tutoriel en français et en anglais sera accessible.
- **Aperçu du Formulaire**: Les formulaires d'étude sont affichés séparément montrant chaque question et les données d'entrée correspondantes en tant que variables définies.
- **Modifier le formulaire**: cette fonction permet la correction des données téléchargées. Il est uniquement accessible aux gestionnaires de données de chaque pays participant et à IVI.
- **Cherche**: Les étiquettes d'étude spécifiques données à chaque formulaire d'étude peuvent être filtrées.
- **Dictionnaire des variables**: Le dictionnaire variable peut être téléchargé.
- **Exporter**: Les données peuvent être converties à partir du serveur dans un fichier Excel transférable.
- **Contactez-nous**: Une correspondance rapide et facile entre les utilisateurs et le gestionnaire de données à IVI est donnée.

Les données seront examinées quotidiennement par le personnel clé de l'étude et vérifiées en termes de consistance et d'exactitude avant l'analyse des données. La qualité des données peut être vérifiée en sélectionnant un sous-ensemble de 5% pour la validation par rapport aux données originales sur support papier, si possible (58). Les noms des membres du ménage ne seront pas liés aux formulaires d'étude de HPAfrica et ne seront pas enregistrés dans la base de données afin d'assurer la confidentialité. L'accès à la base de données sera limité au personnel d'étude autorisé uniquement et les données seront conservées dans un endroit sécurisé et protégé. Des fichiers de sauvegarde provisoires périodiques et au moins trois fichiers de sauvegarde définitifs de la base de données stockés dans un endroit sécurisé et verrouillé éviteront la perte de données et garantiront la sécurité des données. Toutes les données seront conservées pendant au moins cinq ans.

#### L'analyse des données

Les poids d'échantillonnage combinés seront calculés pour tenir compte des différences possibles dans les probabilités de sélection et pour accroître la précision des estimations de l'étude (22, 61). Les poids sont générés dans une approche à plusieurs niveaux pour prendre en compte des probabilités de sélection de par exemple les ménages, les poids inverses au sein des ménages (c'est-à-dire la structure à plusieurs étages à plusieurs familles, la structure à plusieurs étages multifamiliale) et les poids inverses parmi les membres du ménage participant à l'étude HPAfrica (21, 43). Les outils de source ouverte, les données de recensement et les données générées par HPAfrica telles que la taille de la population, le nombre de ménages ou de structures, le nombre de ménages dans les structures multifamiliales / multi-étages et la taille des ménages par strate seront utilisés pour calculer poids (62, 63).

Des analyses descriptives telles que les fréquences absolues et relatives, les médianes ou les moyennes arithmétiques seront effectuées pour construire une description contemporaine de la population de base.

1  
2  
3 Les analyses de base comprendront le calcul des proportions stratifiées selon l'âge et le sexe, des  
4 comportements sanitaires *génériques* et *réels*, y compris l'utilisation des soins de santé, pour divers signes  
5 et symptômes ou combinaisons de signes et de symptômes. Ces analyses permettront une classification  
6 graduelle basée sur la sévérité de la maladie, incluant un intervalle de confiance de 95%. Le comportement  
7 de santé sera ajusté pour un effet de regroupement naturel présumé parmi les membres du ménage. Des  
8 données stratifiées les plus à jour sur la population par site et les données démographiques dérivées de  
9 HPAfrica seront utilisées pour générer les proportions pour l'ajustement des calculs d'incidence.

10  
11 Les informations socio-économiques collectées seront utilisées pour construire des indices de richesse des  
12 populations étudiées en appliquant des analyses factorielles basées sur la méthode des composantes  
13 principales (38). De plus, des analyses de régression bi et multivariée seront effectuées pour identifier les  
14 facteurs de confusion potentiels ou la modification des effets en utilisant les scores factoriels.

15  
16 Les analyses de régression bi et multivariée seront effectuées en utilisant les scores factoriels pour  
17 l'évaluation des variables suivantes:

- 18 • Données socioéconomiques telles que l'éducation, le revenu (64), l'assurance maladie, le  
19 logement et les biens des ménages
- 20 • Hygiène et assainissement tels que l'accès aux toilettes, les sources d'eau, la manipulation des  
21 aliments, l'élimination des déchets et les contacts avec les animaux
- 22 • Comportement sanitaire: *réel* (stratifié selon l'âge et le sexe, gravité, fréquence), *générique*  
23 (stratifié selon l'âge et le sexe, gravité, classement par choix)
- 24 • Modalités de déplacement vers les établissements de santé, stratifiées selon l'âge
- 25 • Saisonnalité liée à l'hygiène et à l'assainissement, comportement sanitaire, modalités de  
26 déplacement
- 27 • Facteurs culturels / religieux / ethnographiques, stratifiés selon l'âge
- 28 • Statut de vaccination parmi les enfants  $\leq 6$  ans (18, 19)
- 29 • Connaissance et perception des maladies courantes

### 30 31 **Considérations éthiques**

32 Il n'y a pas d'avantages directs pour les ménages inscrits et leurs membres. Les avantages indirects pour  
33 la population générale sur les sites seront les informations mises à jour sur le fardeau des maladies  
34 transmissibles, y compris les facteurs influençant la transmission de la maladie et l'infection. L'étude  
35 HPAfrica génère des évidences pour aider les décideurs à introduire des mesures appropriées pour la  
36 prévention et le contrôle des maladies.

37  
38 Ce protocole a fait l'objet d'examen par le Comité de Révision Institutionnelle d'IVI et des comités locaux  
39 spécifiques aux sites, comme indiqué dans la section «Références éthiques». Pendant et après l'étude  
40 HPAfrica, toutes les données des sujets inscrits seront gardées avec une stricte confidentialité et ne seront  
41 pas divulguées à une tierce partie par aucun membre de l'équipe de recherche. La protection par mot de  
42 passe des appareils et de la base de données est utilisée pour une stricte confidentialité. Toutes les données  
43 sur support papier (formulaires de consentement) seront conservées dans un endroit sécurisé et verrouillé.  
44 Les informations confidentielles stockées sur des ordinateurs et des sources de données sur support papier  
45 seront seulement mises à la disposition des co-chercheurs et du personnel d'IVI directement impliqués  
46 dans les activités d'étude de HPAfrica.

### 47 48 **Abbreviations**

49 JSON: JavaScript Objective Notation; CSS: Cascading Style Sheets; JSP: Java Server Page; SQL: Structured  
50 Query Language

## Définitions/Terminologie

| <b>A</b>                                         |                                                                                                                                                                                                                                                                                                                                                                                                                                                                                                                                                                                                                                                                                                 |
|--------------------------------------------------|-------------------------------------------------------------------------------------------------------------------------------------------------------------------------------------------------------------------------------------------------------------------------------------------------------------------------------------------------------------------------------------------------------------------------------------------------------------------------------------------------------------------------------------------------------------------------------------------------------------------------------------------------------------------------------------------------|
| Automédication                                   | Fait de se médicamenter soi-même ou de traiter sa propre maladie ou son état sans supervision médicale ou ordonnance.                                                                                                                                                                                                                                                                                                                                                                                                                                                                                                                                                                           |
| <b>B</b>                                         |                                                                                                                                                                                                                                                                                                                                                                                                                                                                                                                                                                                                                                                                                                 |
| <b>C</b>                                         |                                                                                                                                                                                                                                                                                                                                                                                                                                                                                                                                                                                                                                                                                                 |
| Choléra                                          | Maladie infectieuse de l'intestin grêle qui peut être mortelle causée par la bactérie <i>Vibrio cholerae</i> ; elle se propage par voie fécale-orale par l'ingestion d'eau et d'aliments contaminés et provoque fièvre, diarrhée aqueuse sévère, vomissements et déshydratation.                                                                                                                                                                                                                                                                                                                                                                                                                |
| Confusion/Vertiges/Perte de connaissance         | L'état de désorientation ou d'absence de clarté d'esprit ; l'état anormal de réponse aux stimuli dans l'environnement; faible, woosiness, faiblesse, instabilité ou tendance à tomber; l'interruption de la conscience de soi et de son environnement.                                                                                                                                                                                                                                                                                                                                                                                                                                          |
| Convulsion                                       | Mouvement soudain, violent et irrégulier d'un membre/d'une partie du corps ou de tout le corps causé par une contraction involontaire des muscles.                                                                                                                                                                                                                                                                                                                                                                                                                                                                                                                                              |
| Coqueluche (Pertussis)                           | La coqueluche est une maladie bactérienne très contagieuse. Les symptômes d'un froid commun comme nez qui coule, fièvre et toux sont suivis par des semaines de toux sévère et un son aigu de la coqueluche ou haletant quand une personne malade inspire; toux sévère peut être suivie de vomissements, rupture des côtes ou fatigue extrême. Les très jeunes et les personnes âgées infectées peuvent avoir peu ou pas de toux, ou peuvent avoir des périodes de respiration interrompue pendant lesquelles elles ne respirent pas. La coqueluche est transmise par la bactérie <i>Bordetella pertussis</i> par toux et éternuements d'une personne infectée.                                 |
| <b>D</b>                                         |                                                                                                                                                                                                                                                                                                                                                                                                                                                                                                                                                                                                                                                                                                 |
| Déshydratation                                   | Une condition de perte excessive d'eau/d'hydratation par le corps.                                                                                                                                                                                                                                                                                                                                                                                                                                                                                                                                                                                                                              |
| Diarrhée                                         | Une condition d'évacuer les matières fécales du corps très fréquemment et sous forme plutôt liquide que solide.                                                                                                                                                                                                                                                                                                                                                                                                                                                                                                                                                                                 |
| Difficultés respiratoires/<br>Respiration sévère | Une condition de la respiration anormale accompagnée d'une respiration sifflante, d'une douleur thoracique, d'un tirage thoracique, d'un stridor, d'un gonflement de la poitrine ou d'une toux par exemple.                                                                                                                                                                                                                                                                                                                                                                                                                                                                                     |
| Diphthérie                                       | Maladie hautement contagieuse, parfois mortelle, causée par la bactérie <i>Corynebacterium diphtheriae</i> . Elle se transmet de personne à personne, par l'air ou les objets contaminés et affecte les voies respiratoires supérieures. Les symptômes courants sont maux de gorge, gonflement des glandes/ ganglions lymphatiques, malaise, fièvre/frissons, substance membraneuse/matière grise et épaisse qui se forme dans la gorge/sur les amygdales et gêne/accélère la respiration (toux rauque) et gêne pour avaler. Une forme de diphthérie qui implique la peau, les yeux et les organes génitaux est également signalée et se caractérise par une peau douloureuse, rouge et enflée. |
| Douleur abdominale/<br>Douleur intestinale       | Douleur (aiguë/courte durée ou chronique/longue durée) qui survient entre la poitrine et l'aîne (souvent désignée comme la région de l'estomac/du ventre)                                                                                                                                                                                                                                                                                                                                                                                                                                                                                                                                       |
| Douleur intestinale/Douleur abdominale           | Douleur (aiguë/courte durée ou chronique/longue durée) qui survient entre la poitrine et l'aîne (souvent désignée comme la région de l'estomac/du ventre)                                                                                                                                                                                                                                                                                                                                                                                                                                                                                                                                       |

|                                      |                                                                                                                                                                                                                                                                                                                                                                                                                                                                          |
|--------------------------------------|--------------------------------------------------------------------------------------------------------------------------------------------------------------------------------------------------------------------------------------------------------------------------------------------------------------------------------------------------------------------------------------------------------------------------------------------------------------------------|
| Douleur/Maux                         | État caractérisé par une douleur sourde continue/prolongée dans une partie du corps ; la sensation/souffrance/inconfort physique causée par une maladie/une blessure/quelque chose qui fait mal au corps.                                                                                                                                                                                                                                                                |
| <b>E</b>                             |                                                                                                                                                                                                                                                                                                                                                                                                                                                                          |
| Éducation formelle                   | Modèle d'éducation systématique et organisée structuré et administré selon un ensemble de lois et de normes ; les institutions d'éducation formelle sont organisées de façon administrative, physique et pédagogique et exigent des étudiants une assiduité minimum ; il implique des évaluations intermédiaires et finales afin d'accéder au niveau d'apprentissage suivant ; il délivre des certificats et des diplômes conformément à un ensemble de règles strictes. |
| Essoufflement/<br>Respiration rapide | Fait de respirer anormalement rapidement et profondément ; à une fréquence de >20 respirations par minute pour les adultes, >30 respirations par minute pour les enfants et >45 respirations par minute par les bébés.                                                                                                                                                                                                                                                   |
| Établissement de santé               | Lieux ou institutions où des soins de santé sont prodigués ; dont les hôpitaux, les cliniques, les centres de santé, les postes de santé et les centres de soins spécialisés.                                                                                                                                                                                                                                                                                            |
| Éternuement                          | Fait d'expulser soudainement l'air par le nez et la bouche avec un bruit important caractéristique.                                                                                                                                                                                                                                                                                                                                                                      |
| <b>F</b>                             |                                                                                                                                                                                                                                                                                                                                                                                                                                                                          |
| Faiblesse/Malaise/Fatigue            | État de se sentir fatigué/épuisé/à bout de forces ; sentiment général d'inconfort/malaise/de ne pas être en bonne santé ou heureux.                                                                                                                                                                                                                                                                                                                                      |
| Fatigue/Malaise/<br>Faiblesse        | État de se sentir fatigué/épuisé/à bout de forces ; sentiment général d'inconfort/malaise/de ne pas être en bonne santé ou heureux.                                                                                                                                                                                                                                                                                                                                      |
| Fièvre                               | Température corporelle anormalement élevée (habituellement au-dessus de 38°C).                                                                                                                                                                                                                                                                                                                                                                                           |
| Fièvre <3 jours                      | Température corporelle anormalement élevée (habituellement au-dessus de 38°C) qui dure moins de 3 jours et apparaît en continu.                                                                                                                                                                                                                                                                                                                                          |
| Fièvre >3 jours                      | Température corporelle anormalement élevée (habituellement au-dessus de 38°C) qui dure plus de 3 jours et apparaît en continu.                                                                                                                                                                                                                                                                                                                                           |
| Fièvre jaune                         | Maladie infectieuse aiguë, pathogène pour l'homme et virale caractérisée par l'apparition soudaine de symptômes comme fièvre, frissons, perte d'appétit, nausée, douleurs musculaires et maux de tête qui disparaissent généralement en quelques jours ou sont suivis de symptômes plus graves comme jaunisse, fièvre forte et hémorragie. La maladie est causée par un virus du genre Flavivirus et est transmise par la piqûre d'un moustique infecté.                 |
| Fièvre typhoïde                      | Maladie infectieuse bactérienne potentiellement mortelle causée par <i>Salmonella typhi</i> ; elle se transmet par la voie fécale-orale par les aliments et l'eau contaminés ou de personne à personne. Les symptômes courants sont forte fièvre, maux de tête, douleur abdominale, constipation/diarrhée et éruption cutanée. Des complications graves (perforation de l'intestin) sont rapportées.                                                                     |
| Frissons                             | Sensation de froid qui peut être accompagnée de frissons/tremblements du corps et de pâleur de la peau                                                                                                                                                                                                                                                                                                                                                                   |
| <b>G</b>                             |                                                                                                                                                                                                                                                                                                                                                                                                                                                                          |
| Gonflement/Œdème                     | État d'accumulation excessive de liquide aqueux/gonflement des cavités ou des tissus du corps ; couramment constaté dans les mains/bras/pieds/jambes ; augmentation du volume de tissu.                                                                                                                                                                                                                                                                                  |
| Grippe                               | Maladie infectieuse hautement contagieuse des voies respiratoires causée par le virus de la grippe ; elle se propage de personne à personne                                                                                                                                                                                                                                                                                                                              |

|                                                |                                                                                                                                                                                                                                                                                                                                                                                                                                                                                                                                   |
|------------------------------------------------|-----------------------------------------------------------------------------------------------------------------------------------------------------------------------------------------------------------------------------------------------------------------------------------------------------------------------------------------------------------------------------------------------------------------------------------------------------------------------------------------------------------------------------------|
|                                                | par les particules expulsées par la toux/les éternuements/la parole et les objets contaminés. Les symptômes courants sont fièvre, douleurs dans les muscles/bras/jambes, frissons/sueur, maux de tête, fatigue/faiblesse, nez qui coule/congestion nasale, éternuements, maux de gorge et toux sèche et persistante.                                                                                                                                                                                                              |
| Guérisseur traditionnel                        | Personne qui cherche à maintenir la santé aussi bien qu'à prévenir, diagnostiquer et améliorer ou traiter les maladies en utilisant un ensemble de connaissances, compétences et pratiques basées sur des théories, des croyances et des expériences.                                                                                                                                                                                                                                                                             |
| <b>H</b>                                       |                                                                                                                                                                                                                                                                                                                                                                                                                                                                                                                                   |
| <i>Haemophilus influenzae</i> de type B        | Bactérie qui provoque une série de maladies et se propage par les particules expulsées par la toux ou les éternuements, et surviennent surtout chez l'enfant de moins de 5 ans ; les symptômes courants sont fièvre, maux de tête et raideur dans le cou jusqu'à l'état septique. Elle peut causer otites, cellulites (infection des tissus mous), arthrite, infections des voies respiratoires supérieures, pneumonies, méningites (avec dommages potentiels au cerveau) et épiglottites (avec obstruction des voies aériennes). |
| Hémorragie (interne/externe)/<br>Perte de sang | État caractérisé par une perte de sang du système vasculaire, soit de façon interne à l'intérieur du corps (hémorragie interne) soit de façon externe par un orifice naturel ou une lésion de la peau (hémorragie externe) ; sang qui s'échappe d'un vaisseau sanguin endommagé.                                                                                                                                                                                                                                                  |
| Hépatite B                                     | Maladie infectieuse causée par le virus de l'hépatite B (VHB) qui affecte le foie (infection hépatique aiguë/chronique ; peut entraîner une insuffisance hépatique/un cancer/une cirrhose). Le virus se transmet de personne à personne par le sang/le sperme/les autres fluides corporels. Les symptômes courants sont fièvre, malaise/faiblesse/fatigue, perte d'appétit, nausée/vomissements, gêne/douleur abdominale, urines foncées, douleurs articulaires et jaunisse.                                                      |
| Hépatite E                                     | Maladie infectieuse causée par le virus de l'hépatite E (VHE) qui affecte le foie (infection hépatique aiguë uniquement ; peut entraîner une insuffisance hépatique aiguë). Le virus se propage par les voies fécales-orales par l'ingestion d'eau ou d'aliments contaminés, les animaux contaminés (de façon zoonotique) et par le sang. Les symptômes courants sont fièvre, malaise, perte d'appétit, diarrhée, nausée, gêne abdominale, urines foncées, douleurs articulaires et jaunisse.                                     |
| <b>I</b>                                       |                                                                                                                                                                                                                                                                                                                                                                                                                                                                                                                                   |
| <b>J</b>                                       |                                                                                                                                                                                                                                                                                                                                                                                                                                                                                                                                   |
| Jaunisse                                       | Maladie qui fait jaunir la peau/le blanc des yeux.                                                                                                                                                                                                                                                                                                                                                                                                                                                                                |
| <b>K/L</b>                                     |                                                                                                                                                                                                                                                                                                                                                                                                                                                                                                                                   |
| <b>M</b>                                       |                                                                                                                                                                                                                                                                                                                                                                                                                                                                                                                                   |
| Malaise/Fatigue/<br>Faiblesse                  | État de se sentir fatigué/épuisé/à bout de forces ; sentiment général d'inconfort/malaise/de ne pas être en bonne santé ou heureux.                                                                                                                                                                                                                                                                                                                                                                                               |
| Maux de tête                                   | Douleur continue dans une région de la tête.                                                                                                                                                                                                                                                                                                                                                                                                                                                                                      |
| Maux/Douleur                                   | État caractérisé par une douleur sourde continue/prolongée dans une partie du corps ; la sensation/souffrance/inconfort physique causée par une maladie/une blessure/quelque chose qui fait mal au corps.                                                                                                                                                                                                                                                                                                                         |
| Médecin                                        | Une personne compétente/formée aux soins ; une personne éduquée, cliniquement expérimentée et autorisée à pratiquer la médecine.                                                                                                                                                                                                                                                                                                                                                                                                  |
| Ménage                                         | Personne ou groupe de personnes apparentées ou non qui vivent ensemble dans la même unité d'habitation, qui reconnaissent un adulte de sexe masculin ou féminin comme le chef du ménage, qui partagent                                                                                                                                                                                                                                                                                                                            |

|                                              |                                                                                                                                                                                                                                                                                                                                                                                                                                                                                                                                                                                               |
|----------------------------------------------|-----------------------------------------------------------------------------------------------------------------------------------------------------------------------------------------------------------------------------------------------------------------------------------------------------------------------------------------------------------------------------------------------------------------------------------------------------------------------------------------------------------------------------------------------------------------------------------------------|
|                                              | les mêmes installations domestiques, qu'on considère comme formant une unité, et qui subviennent à leurs besoins en termes de nourriture et des autres éléments essentiels pour vivre. Un ménage peut être situé dans une unité d'habitation unique (bâtiment à un seul étage) ou dans un ensemble de logements collectifs (bâtiment à plusieurs étages).                                                                                                                                                                                                                                     |
| Méningite                                    | Inflammation virale/bactérienne/fongique infectieuse parfois mortelle des membranes (méninges) qui entourent le cerveau et la moelle épinière ; elle se propage de personne à personne par les particules expulsées par la toux/les éternuements/la parole et les objets contaminés. Les symptômes courants sont forte fièvre, maux de tête sévères, nausée/vomissements, confusion, convulsions ; perte d'appétit et de la soif, fatigue, sensibilité à la lumière, éruption cutanée et raideur au cou.                                                                                      |
| <b>N</b>                                     |                                                                                                                                                                                                                                                                                                                                                                                                                                                                                                                                                                                               |
| Nausée/Vomissements                          | Sensation de malaise dans l'estomac avec tendance à vomir ; fait d'éjecter une partie/tout le contenu de l'estomac principalement par la bouche.                                                                                                                                                                                                                                                                                                                                                                                                                                              |
| Nez qui coule                                | État résultant de la production par le nez (tissus nasaux et adjacents et vaisseaux sanguins) de mucus/drainage excessif, qui coule du nez pour retirer quelque chose.                                                                                                                                                                                                                                                                                                                                                                                                                        |
| <b>O</b>                                     |                                                                                                                                                                                                                                                                                                                                                                                                                                                                                                                                                                                               |
| Œdème/Gonflement                             | État d'accumulation excessive de liquide aqueux/gonflement des cavités ou des tissus du corps ; couramment constaté dans les mains/bras/pieds/jambes ; augmentation du volume de tissu.                                                                                                                                                                                                                                                                                                                                                                                                       |
| Oreillons                                    | Maladie infectieuse virale causée par le virus des oreillons qui affecte principalement les glandes parotides qui sont situées sous et devant les oreilles ; elle se propage de personne à personne par la salive infectée/les particules de salive infectées expulsées par la toux/les éternuements/la parole et les objets contaminés. Les symptômes courants sont fièvre, gonflement d'une/des deux glandes parotides, maux de tête ; douleurs musculaires, faiblesse/fatigue, perte d'appétit et douleurs en mâchant/avalant ; une complication connue est une possible perte d'audition. |
| <b>P</b>                                     |                                                                                                                                                                                                                                                                                                                                                                                                                                                                                                                                                                                               |
| Paludisme                                    | Maladie infectieuse parfois mortelle causée par un parasite ( <i>Plasmodium</i> spp.) transmis principalement par la piqûre de moustiques infectés, en dehors de la transmission mère-enfant et par le sang. Les symptômes courants sont attaques récurrentes de frissons, sueurs, forte fièvre, maux de tête, vomissements et diarrhée.                                                                                                                                                                                                                                                      |
| Personne interrogée                          | Membre adulte (à l'âge légal de majorité du pays concerné) du ménage qui est un décideur en ce qui concerne les soins de santé/l'utilisation des soins de santé pour le ménage entier à l'intérieur du site d'étude ; cette personne adulte parle ainsi au nom de tous les membres du ménage. Cette personne peut être identifiée par les autres membres du même ménage comme la personne qui est principalement impliquée dans les soins quotidiens des membres du ménage.                                                                                                                   |
| Perte de connaissance/<br>Vertiges/Confusion | L'état de désorientation ou d'absence de clarté d'esprit ; l'état anormal de réponse aux stimuli dans l'environnement; faible, wooziness, faiblesse, instabilité ou tendance à tomber; l'interruption de la conscience de soi et de son environnement.                                                                                                                                                                                                                                                                                                                                        |
| Perte de poids                               | Baisse (volontaire/involontaire) du poids du corps.                                                                                                                                                                                                                                                                                                                                                                                                                                                                                                                                           |
| Perte de sang/<br>Hémorragie                 | État caractérisé par une perte de sang du système vasculaire, soit de façon interne à l'intérieur du corps (hémorragie interne) soit de façon                                                                                                                                                                                                                                                                                                                                                                                                                                                 |



|                                                  |                                                                                                                                                                                                                                                                                                                                                                                                                                                                                                                                                                                  |
|--------------------------------------------------|----------------------------------------------------------------------------------------------------------------------------------------------------------------------------------------------------------------------------------------------------------------------------------------------------------------------------------------------------------------------------------------------------------------------------------------------------------------------------------------------------------------------------------------------------------------------------------|
|                                                  | externe par un orifice naturel ou une lésion de la peau (hémorragie externe) ; sang qui s'échappe d'un vaisseau sanguin endommagé.                                                                                                                                                                                                                                                                                                                                                                                                                                               |
| Pharmacie                                        | Endroit où seuls des médicaments (ordonnance requise/non requise) sont préparés, conservés, composés et dispensés.                                                                                                                                                                                                                                                                                                                                                                                                                                                               |
| Pneumocoque                                      | Une inflammation infectieuse bactérienne des poumons parfois mortelle qui affecte souvent les personnes immunodéprimées et est causée par la bactérie <i>Streptococcus pneumoniae</i> ; elle se propage de personne à personne par les particules expulsées par la toux/les éternuements/la parole et les objets contaminés. Les symptômes courants sont fièvre, frissons, toux (avec mucosités/pus), douleurs thoraciques, difficulté à respirer/essoufflement, fatigue, nausée/vomissements et diarrhée ; des symptômes rares sont septicémie, épanchement pleural et empyème. |
| Polio                                            | Maladie virale infectieuse, très contagieuse, parfois mortelle, causée par le poliovirus qui cause dans sa forme la plus sévère paralysie et difficultés à respirer ; il se transmet par la voie fécale-orale par ingestion d'eau et d'aliments contaminés et de personne à personne. Les symptômes courants sont fièvre, maux de gorge, maux de tête, vomissements, fatigue, maux de dos, de cou/raideur au cou, faiblesse des muscles/muscles douloureux, méningite, perte de réflexes, membres lourds/pendants.                                                               |
| Occupation                                       | A job, or means of earning a wage/living; often requires the mastery of a complex set of knowledge, tasks, duties and skills acquired through formal education and/or practical experience.                                                                                                                                                                                                                                                                                                                                                                                      |
| <b>Q</b>                                         |                                                                                                                                                                                                                                                                                                                                                                                                                                                                                                                                                                                  |
| <b>R</b>                                         |                                                                                                                                                                                                                                                                                                                                                                                                                                                                                                                                                                                  |
| Respiration rapide/<br>Essoufflement             | Fait de respirer anormalement rapidement et profondément ; à une fréquence de >20 respirations par minute pour les adultes, >30 respirations par minute pour les enfants et >45 respirations par minute par les bébés.                                                                                                                                                                                                                                                                                                                                                           |
| Respiration sévère/<br>Difficultés respiratoires | Une condition de la respiration anormale accompagnée d'une respiration sifflante, d'une douleur thoracique, d'un tirage thoracique, d'un stridor, d'un gonflement de la poitrine ou d'une toux par exemple.                                                                                                                                                                                                                                                                                                                                                                      |
| Revenus/Salaire                                  | Argent ou autre forme de paiement que quelqu'un reçoit périodiquement/régulièrement en échange de biens ou de services. Provient généralement d'un emploi/d'une profession.                                                                                                                                                                                                                                                                                                                                                                                                      |
| Rotavirus                                        | Infection virale causée par le rotavirus qui cause principalement des diarrhées pour les enfants de moins de 5 ans ; elle se propage par la voie fécale-orale, de personne à personne et par les objets contaminés. Les symptômes courants sont diarrhée aqueuse, fièvre, vomissements, douleurs abdominales et déshydratation.                                                                                                                                                                                                                                                  |
| Rougeole                                         | Maladie infectieuse parfois mortelle des voies respiratoire (nez/gorge) causée par un virus qui affecte principalement les enfants de moins de 5 ans ; elle se propage de personne à personne par les particules expulsées par la toux/les éternuements/la parole et les objets contaminés. Les symptômes courants sont fièvre, toux sèche, nez qui coule, inflammation des yeux, maux de gorge, larges plaques sur la peau et points blancs dans la bouche et sur les joues.                                                                                                    |
| Rubéole                                          | Maladie infectieuse virale contagieuse connue pour son éruption cutanée rouge distinctive qui est causée par le virus de la rubéole ; elle se transmet de personne à personne (toux/éternuements/parole), de la mère à l'enfant par le sang et les objets contaminés. Les symptômes courants sont fièvre modérée, maux de tête, nez bouché/qui coule, yeux rouges/inflammation des yeux, ganglions lymphatiques gonflés et                                                                                                                                                       |

|                                          |                                                                                                                                                                                                                                                                                                                                                                                                                                                                                                                                                                                                                                                                                                                                                                                                                                                                                                                                                                      |
|------------------------------------------|----------------------------------------------------------------------------------------------------------------------------------------------------------------------------------------------------------------------------------------------------------------------------------------------------------------------------------------------------------------------------------------------------------------------------------------------------------------------------------------------------------------------------------------------------------------------------------------------------------------------------------------------------------------------------------------------------------------------------------------------------------------------------------------------------------------------------------------------------------------------------------------------------------------------------------------------------------------------|
|                                          | sensibles à la base du crâne/à l'arrière du cou/derrière les oreilles, douleurs articulaires et éruption cutanée rose qui se déplace du visage au torse, aux bras et aux jambes.                                                                                                                                                                                                                                                                                                                                                                                                                                                                                                                                                                                                                                                                                                                                                                                     |
| <b>S</b>                                 |                                                                                                                                                                                                                                                                                                                                                                                                                                                                                                                                                                                                                                                                                                                                                                                                                                                                                                                                                                      |
| Soins de santé - généraux                | Soins de santé pour les maladies qui n'ont aucun lien avec l'apparition de maladies associées aux signes et symptômes ou les dates de début de maladies.                                                                                                                                                                                                                                                                                                                                                                                                                                                                                                                                                                                                                                                                                                                                                                                                             |
| Soins de santé - réels                   | Soins de santé liés l'apparition de maladies associées aux signes et symptômes ou les dates de début de maladies.                                                                                                                                                                                                                                                                                                                                                                                                                                                                                                                                                                                                                                                                                                                                                                                                                                                    |
| <b>T</b>                                 |                                                                                                                                                                                                                                                                                                                                                                                                                                                                                                                                                                                                                                                                                                                                                                                                                                                                                                                                                                      |
| Témoin                                   | Personne adulte (à l'âge légal de majorité du pays concerné), qui est indépendante de l'étude, qui ne peut pas être indûment influencée par le personnel de l'étude, qui participe au processus de consentement éclairé si le sujet/le représentant légal du sujet est analphabète, et qui lit (lettré) le formulaire de consentement éclairé et toute autre information écrite présentée au sujet.                                                                                                                                                                                                                                                                                                                                                                                                                                                                                                                                                                  |
| Tétanos                                  | Une maladie infectieuse caractérisée par des spasmes musculaires qui commencent généralement dans la mâchoire et progresse vers le reste du corps. Les spasmes durent généralement quelques minutes et se produisent fréquemment pendant les 3-4 semaines au début de la maladie, ils peuvent être si graves qu'ils peuvent causer des fractures osseuses ou la mort lorsqu'ils affectent les muscles respiratoires. Elle peut être caractérisée par d'autres symptômes comme fièvre, sueurs, maux de tête, difficultés à avaler, pression artérielle élevée et augmentation du rythme cardiaque. La maladie est causée par une infection par la bactérie <i>Clostridium tetani</i> qui se trouve dans sol, saliva, poussière et fumier. La bactérie entre par une lésion cutanée (par exemple, coupure, blessure par ponction) par un objet contaminé. Il produit des toxines qui interfèrent avec les contractions musculaires qui résultent des spasmes typiques. |
| Toux                                     | Fait d'expulser de façon soudaine/rapide et bruyamment l'air des poumons ; souvent de façon involontaire afin de dégager les voies respiratoires des poumons de fluides/mucus/autres matières                                                                                                                                                                                                                                                                                                                                                                                                                                                                                                                                                                                                                                                                                                                                                                        |
| Troubles cardiaques                      | Tout trouble que affecte le cœur ; maladies qui impliquent des vaisseaux sanguins rétrécis/bloqués qui peuvent entraîner une attaque cardiaque/douleur thoracique/accident vasculaire cérébral ; maladie qui affecte le muscle/les valves/le rythme du cœur.                                                                                                                                                                                                                                                                                                                                                                                                                                                                                                                                                                                                                                                                                                         |
| Troubles de la pression artérielle       | Pression artérielle élevée/faible ou pression artérielle qui présente des fluctuations excessives.                                                                                                                                                                                                                                                                                                                                                                                                                                                                                                                                                                                                                                                                                                                                                                                                                                                                   |
| Tuberculose                              | Maladie infectieuse bactérienne ( <i>Mycobacterium tuberculosis</i> ), contagieuse, potentiellement grave qui affecte principalement les poumons en plus des reins et de la colonne vertébrale/du cerveau ; elle se transmet de personne à personne par les particules expulsées par la toux/les éternuements/la parole. Les symptômes courants d'une tuberculose active sont toux (avec/sans sang), douleur thoracique, perte de poids, fatigue, fièvre, sueurs nocturnes, frissons et perte d'appétit.                                                                                                                                                                                                                                                                                                                                                                                                                                                             |
| <b>U</b>                                 |                                                                                                                                                                                                                                                                                                                                                                                                                                                                                                                                                                                                                                                                                                                                                                                                                                                                                                                                                                      |
| <b>V</b>                                 |                                                                                                                                                                                                                                                                                                                                                                                                                                                                                                                                                                                                                                                                                                                                                                                                                                                                                                                                                                      |
| Vertiges/Confusion/Perte de connaissance | L'état de désorientation ou d'absence de clarté d'esprit ; l'état anormal de réponse aux stimuli dans l'environnement; faible, wooziness, faiblesse, instabilité ou tendance à tomber; l'interruption de la conscience de soi et de son environnement.                                                                                                                                                                                                                                                                                                                                                                                                                                                                                                                                                                                                                                                                                                               |

|                                                                         |                     |                                                                                                                                                                                                                                                                                                                                                                                                                                                                                                                                                                                                                                                                                                                                                                                                                                             |
|-------------------------------------------------------------------------|---------------------|---------------------------------------------------------------------------------------------------------------------------------------------------------------------------------------------------------------------------------------------------------------------------------------------------------------------------------------------------------------------------------------------------------------------------------------------------------------------------------------------------------------------------------------------------------------------------------------------------------------------------------------------------------------------------------------------------------------------------------------------------------------------------------------------------------------------------------------------|
| 1<br>2<br>3<br>4<br>5<br>6<br>7<br>8<br>9<br>10<br>11<br>12<br>13<br>14 | VIH/SIDA            | Maladie infectieuse causée par le virus de l'immunodéficience humaine (VIH) qui affecte/endommage le système immunitaire et entraîne le syndrome immunodéficitaire acquis (SIDA), une maladie chronique et potentiellement mortelle ; il se transmet par les liquides corporels infectieux comme le sang/le sperme/les autres fluides corporels. Les symptômes courants d'une infection aiguë/précoce sont fièvre, fatigue, maux de tête, douleurs articulaires, éruption cutanée, maux de gorge, ganglions lymphatiques enflés, diarrhée, perte de poids, candidose orale et zona. La maladie non traitée évolue en SIDA ; les symptômes causés par un système immunitaire gravement endommagé sont sueurs, fièvre récurrente, diarrhée chronique, lésions sur la langue et dans la bouche, fatigue, perte de poids et éruptions cutanées. |
| 15<br>16<br>17<br>18<br>19<br>20<br>21                                  | Visiteur            | Personne (apparentée ou non) qui rend visite à un ménage pour passer du temps avec les membres du ménage ; un visiteur ne vit pas avec les membres du ménage dans la même unité d'habitation, ne partage pas les mêmes installations domestiques, la même nourriture et autres éléments essentiels à la vie que les membres du ménage, et ne constitue pas une unité avec les membres du ménage.                                                                                                                                                                                                                                                                                                                                                                                                                                            |
| 22<br>23<br>24<br>25<br>26<br>27                                        | Voisin              | Personne (apparentée ou non) vivant dans l'habitation à côté de celle d'un ménage cible ; un voisin ne vit pas avec les membres d'un ménage (à côté) dans la même unité d'habitation, ne partage pas les mêmes installations domestiques, aliments ou autres éléments essentiels à la vie que les membres du ménage (à côté), et ne constitue pas une unité avec les membres du ménage (à côté).                                                                                                                                                                                                                                                                                                                                                                                                                                            |
| 28<br>29<br>30                                                          | Vomissements/Nausée | Sensation de malaise dans l'estomac avec tendance à vomir ; fait d'éjecter une partie/tout le contenu de l'estomac principalement par la bouche.                                                                                                                                                                                                                                                                                                                                                                                                                                                                                                                                                                                                                                                                                            |
| 31                                                                      | <b>W/X/Y/Z</b>      |                                                                                                                                                                                                                                                                                                                                                                                                                                                                                                                                                                                                                                                                                                                                                                                                                                             |

## Formulaires de l'étude

Site \_\_\_\_ Sous-zone \_\_\_\_ Numéro d'habitation \_\_\_\_ Identifiant de l'enquêteur \_\_\_\_

### FORMULAIRE 1 – COMPTE RENDU DES VISITES AUX MÉNAGES

#### Instructions pour l'enquêteur

- Compléter « Formulaire 1 – COMPTE RENDU DES VISITES AUX MÉNAGES » pour chaque ménage visité.
- Compléter « Foyer/Personne interrogée/Complété » une fois que toutes les parties de l'enquête ont été complétées ; si toutes les données n'ont pas été recueillies lors de la visite initiale et/ou d'une visite ultérieure (max. 3 visites), programmer une nouvelle visite.
- **Tentative 1:** Compléter le statut de la visite au ménage et utilisant les choix proposés ; pour « pas à la maison », « à la maison/ne répond pas » et « à la maison/répond/indisponible », programmer une nouvelle visite ; pour « à la maison/répond/refus » indiquez la raison de refus et visitez un ménage de remplacement au plus proche à droite ou à gauche de ce ménage; pour « inexistant/pas d'habitation », passer ce ménage et visiter un ménage de remplacement au plus proche à droite ou à gauche à la place de ce ménage.
- **Tentative 2:** Compléter le statut de la visite du ménage et utilisant les choix proposés ; pour « pas à la maison », « à la maison/ne répond pas » et « à la maison/répond/indisponible », programmer une nouvelle visite.
- **Tentative 3:** Compléter le statut de la visite au ménage et utilisant les choix proposés ; pour « pas à la maison », « à la maison/ne répond pas » et « à la maison/répond/indisponible », passer ce ménage et visiter un ménage de remplacement au plus proche à droite ou à gauche à la place de ce ménage.
- « Site » et « sous-zone » doivent être un numéro à trois chiffres, « numéro d'habitation » un numéro à quatre chiffres, et « identifiant de l'enquêteur » un numéro à deux chiffres (utiliser les listes préparées individuellement pour chaque site pour obtenir les codes) ; saisir « date » au format JJ/MM/AAAA et « heure » au format HH:MM et entourer MATIN ou APRÈS-MIDI. «Étiquette de l'étude» doit être une combinaison d'un code «site» à trois chiffres, d'un code «sous-zone» à trois chiffres et d'un code «numéro d'habitation» à quatre chiffres; le « identifiant de l'enquêteur » doit être un numéro à trois chiffres.

| <b>Tentative 1</b>                     | Date ____/____/____<br>(JJ/MM/AA) | Heure ____/____<br>MATIN/APRÈS-MIDI | Identifiant de l'enquêteur ____                                                                                                                                                                                                                                                                                                                                                                                                   |
|----------------------------------------|-----------------------------------|-------------------------------------|-----------------------------------------------------------------------------------------------------------------------------------------------------------------------------------------------------------------------------------------------------------------------------------------------------------------------------------------------------------------------------------------------------------------------------------|
| STATUT                                 |                                   | Cocher un                           |                                                                                                                                                                                                                                                                                                                                                                                                                                   |
| 1=Pas à la maison                      |                                   | <input type="radio"/>               | ➡ Planifier nouvelle visite (date/heure)                                                                                                                                                                                                                                                                                                                                                                                          |
| 2=À la maison/ Non-répondant           |                                   | <input type="radio"/>               | ➡ Planifier nouvelle visite (date/heure)                                                                                                                                                                                                                                                                                                                                                                                          |
| 3=À la maison/ répondant /Indisponible |                                   | <input type="radio"/>               | ➡ Planifier nouvelle visite (date/heure)                                                                                                                                                                                                                                                                                                                                                                                          |
| 4= À la maison/ Répondant /Complété    |                                   | <input type="radio"/>               |                                                                                                                                                                                                                                                                                                                                                                                                                                   |
| 5= À la maison/ répondant /Refus       |                                   | <input type="radio"/>               | Notez la/les raison(s) du refus; cochez tout ce que s'applique:<br><input type="radio"/> 1=Pas de temps pour répondre aux questions<br><input type="radio"/> 2=Ne veulent pas participer/répondre aux questions<br><input type="radio"/> 3=Autre _____<br><input type="radio"/> 99=Pas de réponse <input type="radio"/> 98=Ne sait pas<br>➡ Visitez un ménage de remplacement le plus proche de ce ménage du côté droit ou gauche |

|                                   |                                   |                                     |                                                                                                                                                                                                                                                                                                                                                                                                                                                                 |
|-----------------------------------|-----------------------------------|-------------------------------------|-----------------------------------------------------------------------------------------------------------------------------------------------------------------------------------------------------------------------------------------------------------------------------------------------------------------------------------------------------------------------------------------------------------------------------------------------------------------|
| 6=Inexistant/Pas une habitation   |                                   | <input type="radio"/>               | ➤ Visitez un ménage de remplacement le plus proche de ce ménage du côté droit ou gauche                                                                                                                                                                                                                                                                                                                                                                         |
| <b>Tentative 2</b>                | Date ____/____/____<br>(JJ/MM/AA) | Heure ____/____<br>MATIN/APRÈS-MIDI | Identifiant de l'enquêteur ____                                                                                                                                                                                                                                                                                                                                                                                                                                 |
| STATUT                            |                                   | Cocher un                           |                                                                                                                                                                                                                                                                                                                                                                                                                                                                 |
| 1=Pas à la maison                 |                                   | <input type="radio"/>               | ➤ Planifier nouvelle visite (date/heure)                                                                                                                                                                                                                                                                                                                                                                                                                        |
| 2=À la maison/Ne répond pas       |                                   | <input type="radio"/>               | ➤ Planifier nouvelle visite (date/heure)                                                                                                                                                                                                                                                                                                                                                                                                                        |
| 3=À la maison/Répond/Indisponible |                                   | <input type="radio"/>               | ➤ Planifier nouvelle visite (date/heure)                                                                                                                                                                                                                                                                                                                                                                                                                        |
| 4= À la maison/Répond/Complété    |                                   | <input type="radio"/>               |                                                                                                                                                                                                                                                                                                                                                                                                                                                                 |
| 5= À la maison/ répondant /Refus  |                                   | <input type="radio"/>               | <p>Notez la/les raison(s) du refus; cochez tout ce que s'applique:</p> <p><input type="radio"/> 1=Pas de temps pour répondre aux questions</p> <p><input type="radio"/> 2=Ne veulent pas participer/répondre aux questions</p> <p><input type="radio"/> 3=Autre _____</p> <p><input type="radio"/> 99=Pas de réponse    <input type="radio"/> 98=Ne sait pas</p> <p>➤ Visitez un ménage de remplacement le plus proche de ce ménage du côté droit ou gauche</p> |
| 6=Inexistant/Pas une habitation   |                                   | <input type="radio"/>               | ➤ Visitez un ménage de remplacement le plus proche de ce ménage du côté droit ou gauche                                                                                                                                                                                                                                                                                                                                                                         |
| <b>Tentative 3</b>                | Date ____/____/____<br>(JJ/MM/AA) | Heure ____/____<br>MATIN/APRÈS-MIDI | Identifiant de l'enquêteur ____                                                                                                                                                                                                                                                                                                                                                                                                                                 |
| STATUT                            |                                   | Cocher un                           |                                                                                                                                                                                                                                                                                                                                                                                                                                                                 |
| 1=Pas à la maison                 |                                   | <input type="radio"/>               | ➤ Visitez un ménage de remplacement le plus proche de ce ménage du côté droit ou gauche                                                                                                                                                                                                                                                                                                                                                                         |
| 2=À la maison/Ne répond pas       |                                   | <input type="radio"/>               | ➤ Visitez un ménage de remplacement le plus proche de ce ménage du côté droit ou gauche                                                                                                                                                                                                                                                                                                                                                                         |
| 3=À la maison/Répond/Indisponible |                                   | <input type="radio"/>               | ➤ Visitez un ménage de remplacement le plus proche de ce ménage du côté droit ou gauche                                                                                                                                                                                                                                                                                                                                                                         |
| 4= À la maison/Répond/Complété    |                                   | <input type="radio"/>               |                                                                                                                                                                                                                                                                                                                                                                                                                                                                 |
| 5= À la maison/ répondant /Refus  |                                   | <input type="radio"/>               | <p>Notez la/les raison(s) du refus; cochez tout ce que s'applique:</p> <p><input type="radio"/> 1=Pas de temps pour répondre aux questions</p> <p><input type="radio"/> 2=Ne veulent pas participer/répondre aux questions</p> <p><input type="radio"/> 3=Autre _____</p> <p><input type="radio"/> 99=Pas de réponse    <input type="radio"/> 98=Ne sait pas</p>                                                                                                |

|                                 |   |                                                                                         |
|---------------------------------|---|-----------------------------------------------------------------------------------------|
|                                 |   | ➡ Visitez un ménage de remplacement le plus proche de ce ménage du côté droit ou gauche |
| 6=Inexistant/Pas une habitation | ○ | ➡ Visitez un ménage de remplacement le plus proche de ce ménage du côté droit ou gauche |

For peer review only

Site \_\_\_\_ Sous-zone \_\_\_\_ Numéro d'habitation \_\_\_\_ Identifiant de l'enquêteur \_\_\_\_

## FORMULAIRE 2 – FORMULAIRE DE CONSENTEMENT

Evaluation des soins de santé à [site SETA and –pays]

### Instructions à l'enquêteur

- Lire le "Formulaire 2 – FORMULAIRE DE CONSENTEMENT" pour le répondant/demander au répondant de lire attentivement le "Formulaire 2 – FORMULAIRE DE CONSENTEMENT" s'il préfère.
- Le répondant tel que défini dans cette enquête est un adulte (ayant l'âge de la majorité spécifique au pays) membre du ménage et responsable des décisions journalières concernant la santé des membres du ménage; il ne doit pas par exemple être un voisin ou un visiteur.
- S'assurer que le répondant a pleinement compris l'objectif, les procédures, les risques et les bénéfices de cette étude avant d'obtenir son consentement à participer.
- Le répondant doit signer le "Formulaire 2 – FORMULAIRE DE CONSENTEMENT"; si le répondant est incapable de signer/analphabète, une empreinte digitale servira en lieu et place de la signature, et un adulte lettré indépendant de l'étude qui servira de témoin (un membre du même ménage ou un voisin par exemple) signera le "Formulaire 2 – FORMULAIRE DE CONSENTEMENT".
- Collecter les informations sur tous les membres du ménage indépendamment du fait qu'ils soient présents ou non au moment de l'entretien; Recueillir l'information sur seulement les individus présents au moment de l'entretien résultera en un biais dans les données.
- Remplir le "Formulaire 2 – FORMULAIRE DE CONSENTEMENT" pour chaque ménage consentant enrôlé dans l'étude.
- Expliquer au répondant qu'il est prévu de revisiter chaque ménage durant une période de 2 ans; à chaque visite, l'équipe de recherche obtiendra un nouveau consentement.
- «Site» et «sous-zone» doivent être un numéro à trois chiffres, «numéro d'habitation» un numéro à quatre chiffres, et «identifiant de l'enquêteur» un numéro à deux chiffres (utiliser les listes préparées individuellement pour chaque site pour obtenir les codes); saisir «date» au format JJ/MM/AAAA et «heure» au format HH:MM et entourer MATIN ou APRÈS-MIDI. «Étiquette de l'étude» doit être une combinaison d'un code «site» à trois chiffres, d'un code «sous-zone» à trois chiffres et d'un code «numéro d'habitation» à quatre chiffres; le «identifiant de l'enquêteur» doit être un numéro à trois chiffres.

### Investigateur principal et co-investigateur de l'étude

[Ajouter les noms de l'investigateur principal et des co-investigateurs de l'étude ainsi que leurs affiliations respectives]

### Introduction

L'Institut International des Vaccins (IVI) et [ajouter l'institution d'affiliation des investigateurs locaux] travaillent ensemble pour examiner les problèmes de santé et le comportement de santé dans votre communauté [ajouter le site SETA-pays], y compris le statu socio-économique, le comportement d'hygiène et d'assainissement et le statut vaccinal des enfants. Nous aimerions mieux comprendre où vous, votre famille et vos voisins cherchez des soins de santé en cas de maladies causant la fièvre/corps chaud et autres chate & symptômes. Cette information nous aidera à savoir à quelle fréquence vous souffrez de maladies causant de la fièvre et les autres liées à la fièvre, fournir une meilleure image des facteurs influençant la transmission de la maladie et l'infection, et à trouver des moyens pour les prévenir et traiter dans votre communauté. Vous, en tant que responsable principal pour le comportement de santé/l'utilisation des soins de santé quotidienne pour les membres de ce ménage, êtes invités à participer parce que vous vivez dans la localité où nous effectuons cette étude. Ce formulaire de consentement sera lu par vous ou pour vous et vous aurez le temps pour prendre votre décision d'accepter ou de refuser de participer à l'étude. S'il vous plaît, demandez aux membres de l'étude d'expliquer tout mot ou toute information que vous ne comprenez pas. On vous donnera en conséquence plus d'informations sur cette étude, y compris ses risques potentiels, les avantages et les inconvénients. Après vous avoir entièrement expliqué l'étude et si vous acceptez de participer, on vous demandera de signer ce formulaire de consentement au nom de tous les membres du ménage. Si vous ne pouvez pas signer le formulaire, nous vous demandons de fournir votre empreinte digitale, et une personne adulte indépendante de l'étude (membre de votre ménage/voisin) signera le formulaire en tant que témoin. Nous allons vous remettre une copie signée et datée du formulaire de consentement.

### Objectif

L'objectif de cette étude est d'examiner les problèmes de santé et l'utilisation des soins de santé dans votre communauté [ajouter le site SETA-pays], y compris le statu socio-économique et le comportement d'hygiène et d'assainissement. Notre objectif est de mieux comprendre où vous, votre famille et vos voisins cherchez les soins de santé pour des maladies causant de la fièvre/corps chaud et autres chate & symptômes. Cette information

1  
2  
3 permettra de mieux estimer le fardeau des maladies communes et d'identifier les moyens pour la mise en place  
4 de mesures de prévention et de traitement pour les maladies.

### 5 **Procédures**

6 Nous visiterons environ [ajouter le nombre pour site d'étude et pays] ménages au total à [ajouter le site et pays]  
7 et poserons les mêmes questions dans chaque ménage. Votre ménage a été choisi pour cette étude simplement  
8 par hasard. Si vous acceptez de participer, nous vous poserons, au nom de tous les membres du ménage,  
9 quelques questions au sujet de votre ménage tel que les initiales, le sexe et l'âge de chaque membre. Nous  
10 aimerions savoir certaines informations relatives à l'éducation et l'occupation du chef de ménage, au revenu, à  
11 la possession de biens, au logement lui-même ainsi qu'à l'hygiène et à l'assainissement dans le contexte de  
12 l'hygiène personnelle, de la préparation et de la manipulation des aliments, des sources d'eau et de la  
13 manipulation, de l'élimination des déchets, de la manipulation des animaux de ferme et domestiques ainsi que  
14 de l'élevage de ce ménage. Nous allons également demander où les membres de votre ménage obtiennent les  
15 soins si quelqu'un a une maladie causant de la fièvre ou toute autre maladie et les facteurs qui peuvent influencer  
16 sur l'utilisation des soins de santé des membres du ménage (c'est-à-dire les modalités de transport, la  
17 disponibilité d'assurance maladie, les facteurs culturels) en plus du statut vaccinal et de la perception de certaines  
18 maladies. Enfin, nous allons mesurer la position géographique de votre maison. Il n'y a pas de bonnes ou de  
19 mauvaises réponses. Vous êtes libre de choisir les questions à répondre. Somme toute, il devrait prendre environ  
20 30-45 minutes pour répondre à toutes les questions. L'entretien peut prendre un peu plus de temps s'il y a  
21 beaucoup de membres dans ce ménage. En outre, nous visiterons votre ménage deux fois en différentes saisons  
22 (une fois pendant la saison sèche et une fois vers la fin de la saison des pluies) pendant la période totale de  
23 l'étude qui est de deux ans environ pour recueillir des données comme décrit dans ce paragraphe du formulaire  
24 de consentement.

### 25 **Participation**

26 Vous, le décideur principal pour le comportement de santé quotidienne et l'utilisation des soins de santé dans ce  
27 ménage, ainsi que les membres de votre ménage, êtes libres de choisir d'accepter ou de refuser de participer à  
28 l'étude. Il n'y a aucun problème si vous ne voulez pas participer. Il n'y a non plus aucun problème si vous voulez  
29 arrêter votre participation à tout moment, et cela ne causera aucun tort à vous ou aux membres de votre ménage.  
30 Donc, la participation à cette étude est volontaire, et vous êtes libre de refuser de participer à l'étude ou vous  
31 pouvez retirer votre consentement à tout moment sans donner de raisons et ceci n'entraînera aucune pénalité.

### 32 **Risques et avantages**

33 La participation à cette étude n'entraîne pas de risque direct. Poser des questions au sujet de votre ménage peut  
34 mettre mal à l'aise vous ou les membres de votre ménage. Après avoir terminé les questions, l'équipe de  
35 recherche pourra fournir des informations sur les soins de santé communautaires pour les participants qui  
36 expriment de la détresse. Vous pouvez refuser de répondre à toute question à tout moment. Vous pouvez faire  
37 une pause ou arrêter de participer à cette étude à tout moment. Il n'y a pas d'avantages directs à être dans  
38 cette étude. Au cours des visites de votre ménage, notre équipe de recherche peut identifier les membres de  
39 votre ménage qui devraient chercher des soins de santé pour les maladies causant de la fièvre et autres. Par  
40 conséquent, elle peut aider à fournir de l'information sur l'offre de soins établie dans votre communauté. Les  
41 avantages indirects sont que toutes les informations collectées contribueront à fournir des données exactes sur  
42 les problèmes de santé, y compris le statu socio-économique, le comportement d'hygiène et d'assainissement et  
43 le statut vaccinal des enfants dans votre communauté. Cela aidera à donner une meilleure compréhension des  
44 facteurs influençant la transmission de la maladie et l'infection, et à estimer le fardeau des maladies courantes  
45 ainsi qu'à trouver des moyens de prévenir et de traiter les personnes dans votre communauté.

### 46 **Coûts et Compensations**

47 Il n'a pas de coûts pour les participants de cette étude. Ni vous ni aucune personne de votre ménage ne sera  
48 indemnisée d'avoir participé.

### 49 **Confidentialité**

50 Tous les fichiers de l'étude et de toutes les informations qui identifient vous et les membres de votre ménage  
51 seront gardées confidentielles. Tous les questionnaires sur papier seront gardés en toute sécurité et les fichiers  
52 informatisés seront protégés par un mot de passe; tous les fichiers de données (sur papier/informatisés) seront  
53 stockés pour un minimum de cinq ans; ces fichiers seront accessibles seulement à quelques personnes  
54 autorisées de l'étude. Ni votre nom ni aucun identifiant ne sera utilisé dans les publications ou les rapports de  
55 cette étude. Les informations que nous collectons à votre sujet et au sujet des membres de votre ménage seront  
56  
57



partagées uniquement avec le personnel de l'étude autorisé et des représentants du comité d'éthique.

### Personnes de contact pour des questions

Si vous ou des membres de votre ménage avez des questions, s'il vous plaît, demandez maintenant à l'équipe de recherche ou à tout moment plus tard en contactant [ajouter le nom de l'investigateur principal et/ou du co-investigateur, leurs affiliations respectives et les numéros de téléphone]. Si vous avez des questions sur vos droits ou ceux des membres du ménage en tant que participant à l'étude, vous pouvez contacter [ajouter le nom et les coordonnées du comité d'éthique local].

### Déclaration de consentement

Ce formulaire de consentement pour participer à l'évaluation des soins de santé et d'autres facteurs liés à la population à [ajouter le site et pays] a été bien lu par moi/pour moi. L'objectif, les procédures, les risques et les avantages ont m'ont été expliqués en détails. J'ai été autorisé à poser des questions à tout moment, et mes questions ont été répondues à ma satisfaction par l'équipe de recherche. On m'a dit la personne à contacter en cas de questions ou si je veux discuter de problèmes ou préoccupations. On m'a dit que je recevrai une copie signée et datée de ce formulaire de consentement. Je suis rassuré que toutes les informations obtenues par suite de cette étude seront gardées confidentielles et utilisées uniquement aux fins de cette étude, et seulement par les institutions participantes.

Moi, le répondant, consens, par la présente, volontairement à participer à cette étude. Je suivrai les instructions de l'équipe de recherche et donnerai mon entière collaboration. Je comprends que j'ai le droit de me retirer de l'étude à tout moment.

#### RÉPONDANT

Nom : \_\_\_\_\_  
(prénom + deuxième prénom (si disponible) + nom de famille)

Signature : \_\_\_\_\_  
(Représentation manuscrite du nom/ marque que la personne écrit sur un document comme une preuve d'identité)

Date \_\_\_\_/\_\_\_\_/\_\_\_\_ (YY/MM/AAAA)

Empreinte du  
pouce

Si le répondant ne peut pas signer/est analphabète, mais accepte de participer, enregistre l'empreinte du pouce dans la boîte ci-dessus, et demande à un témoin adulte, alphabétisé et indépendant de l'étude (par exemple membre du même ménage ou un voisin), de signer ci-dessous :

#### TÉMOIN

Nom : \_\_\_\_\_  
(prénom + deuxième prénom (si disponible) + nom de famille)

Signature : \_\_\_\_\_  
(Représentation manuscrite du nom/ marque que la personne écrit sur un document comme une preuve d'identité)

Date \_\_\_\_/\_\_\_\_/\_\_\_\_ (YY/MM/AAAA)

Moi, l'enquêteur, j'ai lu/expliqué l'étude au répondant nommé ci-dessus (témoin si le répondant est analphabète) dans une langue que le répondant comprend bien. Je suis certain que le répondant a compris l'information et accepte qu'on lui pose des questions.

#### INTERVIEWER

Nom : \_\_\_\_\_  
(prénom + deuxième prénom (si disponible) + nom de famille)

Signature : \_\_\_\_\_  
(Représentation manuscrite du nom/ marque que la personne écrit sur un document comme une preuve d'identité)

Date \_\_\_\_/\_\_\_\_/\_\_\_\_ (YY/MM/AAAA)

Site \_\_\_\_ Sous-zone \_\_\_\_ Numéro d'habitation \_\_\_\_ Identifiant de l'enquêteur \_\_\_\_

### FORMULAIRE 3: INFORMATIONS GÉNÉRALES SUR LE MÉNAGE

#### Instructions pour l'enquêteur

- Compléter ce formulaire uniquement si la personne interrogée a consenti à participer (voir « Formulaire 2 — FORMULAIRE DE CONSENTEMENT ») ; la personne interrogée ainsi que définie pour cette enquête est un adulte (selon l'âge légal de majorité du pays), un membre du ménage et un décideur en ce qui concerne les soins de santé quotidiens et l'utilisation de soins de santé pour le ménage entier et ses membre ; il ne doit pas être, par exemple, un voisin ou un visiteur.
- Recueillir les données de tous les membres du ménage que tous les membres du ménage soient présents ou non au moment de l'entretien ; ne recueillir et n'inscrire les données que des personnes présentes au moment de l'entretien fausserait les données.
- Un ménage est défini/les membres d'un ménage sont définis comme une personne ou un groupe de personnes avec ou sans lien de parenté qui vivent ensemble dans la même unité d'habitation, qui reconnaissent un adulte de sexe masculin ou féminin comme chef de ménage, qui partagent les mêmes installations domestiques, qui sont considérés comme constituant une unité, et qui subviennent à leurs besoins en termes de nourriture et des autres éléments essentiels pour vivre.
- « Site » et « sous-zone » doivent être un numéro à trois chiffres, « numéro d'habitation » un numéro à quatre chiffres, et « identifiant de l'enquêteur » un numéro à deux chiffres (utiliser les listes préparées individuellement pour chaque site pour obtenir les codes) ; saisir « date » au format JJ/MM/AAAA et « heure » au format HH:MM et entourer MATIN ou APRÈS-MIDI. «Étiquette de l'étude» doit être une combinaison d'un code «site» à trois chiffres, d'un code «sous-zone» à trois chiffres et d'un code «numéro d'habitation» à quatre chiffres; le « identifiant de l'enquêteur » doit être un numéro à trois chiffres.

### FORMULAIRE 3: INFORMATIONS GÉNÉRALES SUR LE MÉNAGE

#### PARTIE A – DONNÉES DÉMOGRAPHIQUES/ INFORMATIONS GÉNÉRALES SUR LE MÉNAGE

##### EMPLACEMENT DU DOMICILE

#### 1 Numéros de site, de sous-zone et d'habitation

*Instructions :* Site (=site d'étude) et sous-zone (=plus petite unité du site d'étude) doivent être tous les deux des numéros à trois chiffres, et numéro d'habitation doit être un code à quatre chiffres ; utiliser les listes préparées individuellement pour obtenir les codes respectifs.

Site: \_\_\_\_\_ Sous-zone: \_\_\_\_\_ Numéro d'habitation: \_\_\_\_\_

#### 2 Coordonnées GPS

*Instructions :* Prendre les coordonnées GPS approximativement au centre de la maison. Inscrire l'altitude par un nombre à quatre chiffres (unité : mètre), et la latitude/longitude par un numéro à huit chiffres (unités : degrés, minutes décimales).

1=Ménage d'origine       2=Ménage de remplacement (côte droit/gauche du ménage d'origine)

Altitude: \_\_\_\_\_

Latitude: \_\_\_\_\_° \_\_\_\_\_'      Longitude: \_\_\_\_\_° \_\_\_\_\_'

##### PERSONNE INTERROGÉE

#### 3 Inscrire le nom complet de la personne interrogée.

*Instructions :* Inscrire le prénom, le deuxième nom (le cas échéant) et le nom de famille de la personne interrogée.

#### 4 Inscrire l'âge de la personne interrogée.

*Instruction :* Utiliser un numéro à trois chiffres (unité: année). \_\_\_\_\_

#### 5 Inscrire le sexe de la personne interrogée.

1=Masculin       2=Féminin

#### 6 Quel est le lien de la personne interrogée avec le ménage ?

1=Chef de ménage       7=Conjoint du chef de ménage  
 2=Fils/fille du chef de ménage       8=Conjoint du fils/fille du chef de ménage

- 3=Frère/sœur du chef de ménage       9=Conjoint du frère/sœur du chef de ménage  
 4=Mère/père du chef de ménage       10=Belle-mère/beau-père du chef de ménage  
 5=Petite-fille/petit-fils du chef de ménage       11=Nièce/neveu du chef de ménage  
 6=Autre, préciser \_\_\_\_\_       98=Pas de réponse

### MEMBRES DU MÉNAGE

#### 7 Combien de membres du ménage vivent dans ce domicile au total (au moment de la visite) ?

*Instruction* : Utiliser un numéro à deux chiffres.

Nombre total de membres du ménage : \_\_\_\_

#### 8 Inscrire l'âge et le sexe de chaque membre du ménage.

*Instructions* : Inscrire les initiales, l'âge et le sexe de la personne interrogée en première position/ligne du tableau. Les initiales, l'âge et le sexe de tous les autres membres du ménage doivent être inscrits ensuite. Les initiales d'un membre du ménage consistent en les trois premières lettres du prénom et les trois premières lettres du nom de famille (un éventuel deuxième nom ne fait pas partie des initiales). Inscrire l'âge de chaque membre du ménage avec un numéro à trois chiffres (unité : années) ; si l'âge d'un des membres du ménage  $\leq 12$  mois, inscrire 1 an comme âge. Merci de compléter un formulaire supplémentaire si le ménage a plus de vingt membres.

| Membre du ménage<br>Identifiant | Initiales<br>[prénom/nom de famille] | Âge<br>[années] | Sexe                   |
|---------------------------------|--------------------------------------|-----------------|------------------------|
| 1/Personne interrogée           | ____/____                            | ____            | O1=Masculin O2=Féminin |
| 2                               | ____/____                            | ____            | O1=Masculin O2=Féminin |
| 3                               | ____/____                            | ____            | O1=Masculin O2=Féminin |
| 4                               | ____/____                            | ____            | O1=Masculin O2=Féminin |
| 5                               | ____/____                            | ____            | O1=Masculin O2=Féminin |
| 6                               | ____/____                            | ____            | O1=Masculin O2=Féminin |
| 7                               | ____/____                            | ____            | O1=Masculin O2=Féminin |
| 8                               | ____/____                            | ____            | O1=Masculin O2=Féminin |
| 9                               | ____/____                            | ____            | O1=Masculin O2=Féminin |
| 10                              | ____/____                            | ____            | O1=Masculin O2=Féminin |
| 11                              | ____/____                            | ____            | O1=Masculin O2=Féminin |
| 12                              | ____/____                            | ____            | O1=Masculin O2=Féminin |
| 13                              | ____/____                            | ____            | O1=Masculin O2=Féminin |
| 14                              | ____/____                            | ____            | O1=Masculin O2=Féminin |
| 15                              | ____/____                            | ____            | O1=Masculin O2=Féminin |
| 16                              | ____/____                            | ____            | O1=Masculin O2=Féminin |
| 17                              | ____/____                            | ____            | O1=Masculin O2=Féminin |
| 18                              | ____/____                            | ____            | O1=Masculin O2=Féminin |
| 19                              | ____/____                            | ____            | O1=Masculin O2=Féminin |
| 20                              | ____/____                            | ____            | O1=Masculin O2=Féminin |

**FORMULAIRE 3: INFORMATIONS GÉNÉRALES SUR LE MÉNAGE**  
**PARTIE B – DONNÉES SOCIO-ECONOMIQUES**

**ÉDUCATION**

- 1 Le chef de ménage sait-il lire en [inscrire la langue officielle du site d'étude/pays] ?**  
 1=Oui       2=Non       99=Ne sait pas       98=Pas de réponse
- 2 Le chef de ménage sait-il écrire en [inscrire la langue officielle du site d'étude/pays] ?**  
 1=Oui       2=Non       99=Ne sait pas       98=Pas de réponse
- 3 Quel est le niveau d'éducation scolaire le plus élevé atteint par le chef de ménage ?**  
 1=École primaire       4=Plus élevé que le lycée       99=Ne sait pas  
 2=Collège       5= PAS D'ÉDUCATION       98=Pas de réponse  
 3=Lycée       6=Autre, préciser \_\_\_\_\_

**PROFESSION/RESSOURCES FINANCIÈRES**

**4 Quelle est la profession principale du chef de ménage ?**

*Instructions : Inscrire le statut du jour de visite uniquement.*

- 1=Groupe 1 : Cadres  
 (directeurs généraux, hauts fonctionnaires, législateurs ; cadres administratifs et commerciaux ; responsables de production et de services spécialisés ; responsables dans l'hôtellerie, la vente et d'autres services)
- 2=Groupe 2 : Professionnels  
 (scientifiques ou ingénieurs ; professionnels de santé ; professionnels de l'enseignement ; professionnels de l'administration et des affaires ; professionnels de l'information et des technologies de communication ; professionnels du droit, du social ou de la culture)
- 3=Groupe 3 : Techniciens et professions intermédiaires  
 (Professions intermédiaires des sciences et techniques ; professions intermédiaires de la santé ; professions intermédiaires de l'administration et des affaires ; professions intermédiaires du droit, du social, de la culture et assimilés ; techniciens de l'information et des communications)
- 4=Groupe 4 : Employés de bureau  
 (secrétaires et dactylographes ; employé de service clientèle ; employé de conservation des données et de la documentation ; autres employés de bureau)
- 5=Groupe 5 : Travailleurs des services et de la vente  
 (travailleurs du service aux personnes ; travailleurs de la vente ; travailleurs des soins aux personnes ; travailleurs des services de protection)
- 6=Groupe 6 : Travailleurs qualifiés de l'agriculture, la sylviculture et la pêche  
 (travailleurs qualifiés de l'agriculture orientés marché ; éleveurs d'animaux ; travailleurs qualifiés de la sylviculture, la pêche et la chasse orientés marché ; agriculteurs, pêcheurs, chasseurs et cueilleurs de subsistance)
- 7=Groupe 7 : Travailleurs manuels et assimilés  
 (travailleurs de la construction et assimilés (à l'exception des électriciens) ; travailleurs de la métallurgie, sur machines et assimilés ; artisans et travailleurs de l'imprimerie ; travailleurs des métiers de l'électricité et de l'électronique ; travailleurs des métiers de la transformation des aliments, du bois, des vêtements et assimilés)
- 8=Groupe 8 : Opérateurs de machines et d'installations, et monteurs  
 (Opérateurs de machines et d'installations fixes ; monteurs ; conducteurs opérateurs d'installations mobiles)
- 9=Groupe 9 : Emplois non qualifiés  
 (agents d'entretien et assistants ; ouvriers de l'agriculture, la sylviculture et la pêche ; travailleurs des mines, de la construction, de l'industrie et des transports ; assistants à la préparation des aliments ; vendeurs et services de rue et assimilés ; travailleurs de la collecte des ordures et autres travailleurs non qualifiés)
- 10=Groupe 0 : Professions des forces armées  
 (officiers des forces armées ; sous-officiers des forces armées ; professions des forces armées, autres grades)
- 11=Autre, préciser \_\_\_\_\_
- 12=PAS DE PROFESSION       99=Ne sait pas       98=Pas de réponse

**5 Quel est le montant moyen des revenus mensuels du chef de ménage en lien avec à la profession indiquée en question 4 ainsi que celui des autres membres du ménage ?**

*Instruction* : Tick one answer per household head/enter one code per household member if applicable/if income available.

| Chef de ménage                    | Membre 1                                 | Membre 2                                                   | Membre 3                                |
|-----------------------------------|------------------------------------------|------------------------------------------------------------|-----------------------------------------|
| Code _____                        | Code _____                               | Code _____                                                 | Code _____                              |
| [1] <100USD<br>[2] ≥100 à <150USD | [3] ≥150 à <200USD<br>[4] ≥200 à <250USD | [5] ≥250USD<br>[6] PAS DE REVENU (chef de ménage; voir Q4) | [99] Ne sait pas<br>[98] Pas de réponse |

**6 Quels sont les autres sources ou les sources supplémentaires de revenus mensuels du ménage et quel en est le montant ?**

*Instruction* : Cocher plusieurs cases si nécessaire ; il peut y avoir plus d'une réponse.

| Autres sources/Sources supplémentaires                                                                                                                                                                                                                                                                                                                             | Revenus financiers mensuels globaux                                                                                                                                                                   |
|--------------------------------------------------------------------------------------------------------------------------------------------------------------------------------------------------------------------------------------------------------------------------------------------------------------------------------------------------------------------|-------------------------------------------------------------------------------------------------------------------------------------------------------------------------------------------------------|
| <input type="radio"/> 1=Aides sociales<br><input type="radio"/> 2=Assurances (publiques ou privées)<br><input type="radio"/> 3=Prêt (d'amis, de membres de la famille, d'une banque)<br><input type="radio"/> 4=Vente (bétail, récoltes, meubles, autres biens)<br><input type="radio"/> 5=Économies personnelles<br><input type="radio"/> 6=Autre, préciser _____ | <input type="radio"/> 1=<100 USD<br><input type="radio"/> 2=≥100 à <150 USD<br><input type="radio"/> 3=≥150 à <200 USD<br><input type="radio"/> 4=≥200 à <250 USD<br><input type="radio"/> 5=≥250 USD |
| <input type="radio"/> 7=PAS D'AUTRES SOURCES/DE SOURCES SUPPLÉMENTAIRES<br><input type="radio"/> 99=Ne sait pas<br><input type="radio"/> 98=Pas de réponse                                                                                                                                                                                                         |                                                                                                                                                                                                       |

**LOGEMENT/HABITATION**

**7 Les membres du ménage sont-ils propriétaires de l'habitation ?**

- 1=Oui       3=Non, logement fourni (par le gouvernement, un employeur)       99=Ne sait pas  
 2=Non, locataires       4=Non, autres, préciser \_\_\_\_\_       98=Pas de réponse

**8 Combien de pièces ou structures individuelles de l'habitation sont utilisées pour dormir, vivre, faire la cuisine ou se laver ?**

*Instruction* : N'indiquer qu'un code par catégorie.

| Chambre            | Salon                | Cuisine                                 | Salle de bain |
|--------------------|----------------------|-----------------------------------------|---------------|
| Code _____         | Code _____           | Code _____                              | Code _____    |
| [1] 1-2<br>[2] 3-4 | [2] >4<br>[2] Aucune | [99] Ne sait pas<br>[98] Pas de réponse |               |

**9 En quel matériau sont construits le sol, les murs et le toit des pièces/des structures individuelles de l'habitation ?**

*Instruction* : Indiquer tous les codes par catégorie ; plus d'une réponse par catégorie est possible.

| Sol                            | Murs                                                       | Toit                                                                                    |
|--------------------------------|------------------------------------------------------------|-----------------------------------------------------------------------------------------|
| Code _____                     | Code _____                                                 | Code _____                                                                              |
| [1] Brique<br>[2] Ciment/Béton | [3] Tuiles<br>[4] Terre<br>[5] Bois<br>[6] Paille/feuilles | [7] Métal/Étain<br>[8] Autre, préciser _____<br>[99] Ne sait pas<br>[98] Pas de réponse |

**10 Les membres de ce ménage ont-ils accès à/utilisent-ils l'électricité dans cette habitation ?**

- 1=Oui       2=Non       99=Ne sait pas       98=Pas de réponse

**11 À quelle source de lumière principale les membres de ce ménage ont-ils accès/Quelle source de lumière principale utilisent-ils ?**

- 1=Lumière/ampoule(s) électrique(s)       4=Lampe(s) à piles       7= Autre, préciser \_\_\_\_\_  
 2=Lumière du soleil/Lampe(s) solaire(s)       5=Bougie(s)       99=Ne sait pas  
 3=Lampe(s) à pétrole/à huile       6=PAS DE SOURCE DE LUMIÈRE       98=Pas de réponse

**BIENS DU MÉNAGE****12 Parmi les articles suivants, lesquels les membres du ménage possèdent-ils ?**

*Instructions* : Cocher plusieurs cases si nécessaire ; il peut y avoir plus d'une réponse ; indiquer la quantité d'articles fonctionnels si nécessaire

|                                             |               |                            |                                                                 |               |                            |
|---------------------------------------------|---------------|----------------------------|-----------------------------------------------------------------|---------------|----------------------------|
| <input type="radio"/> 1=Radio               | Quantité ____ | <input type="radio"/> Rien | <input type="radio"/> 11=Lecteur cassettes/CD                   | Quantité ____ | <input type="radio"/> Rien |
| <input type="radio"/> 2=Télévision          | Quantité ____ | <input type="radio"/> Rien | <input type="radio"/> 12=Ordinateur de bureau/portable/tablette | Quantité ____ | <input type="radio"/> Rien |
| <input type="radio"/> 3=Connexion internet  | Quantité ____ | <input type="radio"/> Rien | <input type="radio"/> 13=Téléphone portable                     | Quantité ____ | <input type="radio"/> Rien |
| <input type="radio"/> 4=Voiture             | Quantité ____ | <input type="radio"/> Rien | <input type="radio"/> 14=Camion/bus                             | Quantité ____ | <input type="radio"/> Rien |
| <input type="radio"/> 5=Moto                | Quantité ____ | <input type="radio"/> Rien | <input type="radio"/> 15=Vélo                                   | Quantité ____ | <input type="radio"/> Rien |
| <input type="radio"/> 6=Char à bœufs/ânes   | Quantité ____ | <input type="radio"/> Rien | <input type="radio"/> 16=Lit                                    | Quantité ____ | <input type="radio"/> Rien |
| <input type="radio"/> 7=Matelas             | Quantité ____ | <input type="radio"/> Rien | <input type="radio"/> 17=Moustiquaire                           | Quantité ____ | <input type="radio"/> Rien |
| <input type="radio"/> 8=Table               | Quantité ____ | <input type="radio"/> Rien | <input type="radio"/> 18=Chaise                                 | Quantité ____ | <input type="radio"/> Rien |
| <input type="radio"/> 9=Réfrigérateur (4°C) | Quantité ____ | <input type="radio"/> Rien | <input type="radio"/> 19=Congélateur (-20°C)                    | Quantité ____ | <input type="radio"/> Rien |
| <input type="radio"/> 10=Ventilateur        | Quantité ____ | <input type="radio"/> Rien | <input type="radio"/> 20=Machine à coudre                       | Quantité ____ | <input type="radio"/> Rien |



- 3=Oui, cuisine intérieure/dans une pièce/structure individuelle d'habitation ; sur la propriété d'un ménage voisin (privée, partagée)  
 4=Oui, cuisine extérieure/hors d'une pièce/structure individuelle d'habitation/ en plein air ; sur la propriété d'un ménage voisin (privée, partagée)  
 5=PAS DE CUISINE  
 6=Autre, préciser \_\_\_\_\_  99=Ne sait pas  98=Pas de réponse

**6 Quelle source d'énergie les membres de ce ménage utilisent-ils habituellement pour cuisiner/préparer la nourriture/les repas ?**

- 1=Électricité  3=Charbon de bois  5=Excréments d'animaux  99=Ne sait pas  
 2=Gaz/pétrole  4=Bois/paille/feuilles  6=Autre, préciser \_\_\_\_\_  98=Pas de réponse

**7 Quelle moyen de cuisson les membres de ce ménage utilisent-ils habituellement pour cuisiner/préparer la nourriture/les repas ?**

- 1=Foyer ouvert  3=Fourneau intérieur avec cheminée  99=Ne sait pas  
 2=Fourneau extérieur  4=Autre, préciser \_\_\_\_\_  98=Pas de réponse

**8 Où les membres de ce ménage conservent-ils habituellement les produits alimentaires frais/crus (comme les légumes, la salade, les fruits, les produits laitiers, les œufs, la viande et le poisson) et les restes/les aliments/repas préparés ?**

*Instruction :* Indiquer un code par catégorie uniquement. À l'intérieur signifie à l'intérieur d'une pièce/d'une habitation individuelle/d'un bâtiment ; à l'extérieur signifie à l'extérieur d'une pièce/d'une habitation individuelle/d'un bâtiment.

| Des produits alimentaires frais/crus (légumes, salade, fruits, produits laitiers, œufs, viande et poisson)                                                                                                                                                                                                                                                                                                                                                                                                                                                                                                                                                                                                                          | Des restes/aliments/repas préparés |
|-------------------------------------------------------------------------------------------------------------------------------------------------------------------------------------------------------------------------------------------------------------------------------------------------------------------------------------------------------------------------------------------------------------------------------------------------------------------------------------------------------------------------------------------------------------------------------------------------------------------------------------------------------------------------------------------------------------------------------------|------------------------------------|
| Code _____                                                                                                                                                                                                                                                                                                                                                                                                                                                                                                                                                                                                                                                                                                                          | Code _____                         |
| [1] À température ambiante (à l'intérieur, sur la propriété du ménage, privé)<br>[2] À température ambiante (à l'extérieur, sur la propriété du ménage, privé)<br>[3] À température ambiante (à l'intérieur, sur la propriété d'un ménage voisin, privé, partagé)<br>[4] À température ambiante (à l'extérieur, sur la propriété d'un ménage voisin, privé, partagé)<br>[5] Réfrigérateur (sur la propriété du ménage, privé)<br>[6] Réfrigérateur (sur la propriété d'un ménage voisin, privé, partagé)<br>[7] Congélateur (sur la propriété du ménage, privé)<br>[8] Congélateur (sur la propriété d'un ménage voisin, privé, partagé)<br>[9] Autre, préciser _____ [10] PAS DE CONSERVATION [99] Ne sait pas [98] Pas de réponse |                                    |

**9 Si la réponse à la question 8 au sujet des produits alimentaires frais/crus et/ou des restes/aliments/repas préparés est «température ambiante», combien de temps les membres de ce ménage les conservent-ils habituellement?**

*Instruction :* Indiquer un code par catégorie uniquement.

| Des produits alimentaires frais/crus (légumes, salade, fruits, produits laitiers, œufs, viande et poisson)      | Des restes/aliments/repas préparés |
|-----------------------------------------------------------------------------------------------------------------|------------------------------------|
| Code _____                                                                                                      | Code _____                         |
| [1] <1 jour [3] 3-4 jours [5] Pas applicable [99] Ne sait pas<br>[2] 1-2 jours [4] >4 jours [98] Pas de réponse |                                    |

**10 Les membres de ce ménage couvrent-ils habituellement les restes/aliments/repas préparés? Réchauffent-ils/recuisent-ils les restes/aliments/repas préparés avant de les consommer?**

*Instruction :* Indiquer un code par catégorie uniquement.

| Couvrent les restes/les aliments/repas préparés      | Réchauffent/Recuisent les restes/les aliments/repas préparés |
|------------------------------------------------------|--------------------------------------------------------------|
| Code _____                                           | Code _____                                                   |
| [1] Oui [2] Non [99] Ne sait pas [98] Pas de réponse |                                                              |



**11 Quel membre(s) de ce ménage cuisine(s)/prépare(s) la nourriture/les repas habituellement pour les autres membres de ce ménage ?**

*Instructions :* Se référer à la question 9 du « Formulaire 3 Partie A – Données démographiques/Informations générales sur le ménage » et indiquer les initiales/ Identifiant (s) du membre.

- Membre du ménage, indiquer les initiales/identificateur(s) \_\_\_\_\_  
 99=Ne sait pas     98=Pas de réponse

**12 Comment le(s) membre(s) de la famille qui cuisine(nt)/prépare(nt) la nourriture/les repas habituellement pour les autres membres de ce ménage comme indiqué à la question 11 se prépare(nt)-t-il(s)/elle(s) habituellement avant et après la préparation des repas?**

*Instruction :* Indiquer un code par catégorie uniquement.

| Avant la préparation des repas                                                                                                                                                                                                                                 | Après la préparation des repas                                                                                                                                 |
|----------------------------------------------------------------------------------------------------------------------------------------------------------------------------------------------------------------------------------------------------------------|----------------------------------------------------------------------------------------------------------------------------------------------------------------|
| Code _____                                                                                                                                                                                                                                                     | Code _____                                                                                                                                                     |
| [1] Lavent les mains avec du savon et de l'eau<br>[2] Lavent les mains avec de l'eau uniquement<br>[3] Frottent les mains avec des feuilles/de la paille/de l'herbe<br>[4] Frottent les mains avec du sable<br>[5] Frottent les mains avec un chiffon/du tissu | [6] Ne lavent pas, pas besoin/pas sale<br>[7] Ne lavent pas, rien pour laver les mains<br>[8] Autre, préciser _____<br>[99] Ne sait pas<br>[98] Pas de réponse |

**13 Comment les membres de ce ménage se préparent-ils habituellement avant et après avoir mangé de la nourriture/des repas, y compris le membre du ménage qui cuisine/prépare la nourriture/les repas habituellement comme indiqué à la question 11?**

*Instruction :* Indiquer un code par catégorie uniquement.

| Avant la préparation des repas                                                                                                                                                                                                                                 | Après la préparation des repas                                                                                                                                 |
|----------------------------------------------------------------------------------------------------------------------------------------------------------------------------------------------------------------------------------------------------------------|----------------------------------------------------------------------------------------------------------------------------------------------------------------|
| Code _____                                                                                                                                                                                                                                                     | Code _____                                                                                                                                                     |
| [1] Lavent les mains avec du savon et de l'eau<br>[2] Lavent les mains avec de l'eau uniquement<br>[3] Frottent les mains avec des feuilles/de la paille/de l'herbe<br>[4] Frottent les mains avec du sable<br>[5] Frottent les mains avec un chiffon/du tissu | [6] Ne lavent pas, pas besoin/pas sale<br>[7] Ne lavent pas, rien pour laver les mains<br>[8] Autre, préciser _____<br>[99] Ne sait pas<br>[98] Pas de réponse |

**14 Comment les membres de ce ménage mangent-ils habituellement leur nourriture/leurs repas, y compris le membre du ménage qui cuisine/prépare la nourriture/les repas habituellement comme indiqué à la question 11?**

- 1=Avec des couverts     3=Autre, préciser \_\_\_\_\_     99=Ne sait pas  
 2=Avec les doigts     98=Pas de réponse

**15 Les membres de ce ménage mangent-ils habituellement leur nourriture/leurs repas dans le même récipient, y compris le membre du ménage qui cuisine/prépare la nourriture/les repas habituellement comme indiqué à la question 11?**

- 1=Oui     2=Non     99=Ne sait pas     98=Pas de réponse

**16 Où les membres de ce ménage obtiennent-ils habituellement leurs produits alimentaires frais/crus principaux comme les légumes, les fruits, les grains/céréales, les produits laitiers, les œufs, la viande et le poisson?**

*Instruction :* Indiquer un code par catégorie uniquement.

| Légumes, fruits, grains/céréales                                                                                                        | Produits laitiers                                                                                                                | Œufs, viande, poisson |
|-----------------------------------------------------------------------------------------------------------------------------------------|----------------------------------------------------------------------------------------------------------------------------------|-----------------------|
| Code _____                                                                                                                              | Code _____                                                                                                                       | Code _____            |
| [1] Agriculture vivrière (cour/arrière-cour)<br>[2] Supermarché/Épicerie<br>[3] Amis/famille<br>[4] Marché ouvert<br>[5] Vendeur de rue | [6] Agriculture vivrière (terre agricole)<br>[7] Boucher<br>[8] Autre, préciser _____<br>[99] Ne sait pas<br>[98] Pas de réponse |                       |



*Instruction* : Indiquer un code par catégorie uniquement.

| Boisson                                                                                                                                                                                                                                                                                                                                                                                                                                                                                                                                                                                                                                                                                                                                                                                                                                                               | Cuisine    | Bain             | Nettoyage           |
|-----------------------------------------------------------------------------------------------------------------------------------------------------------------------------------------------------------------------------------------------------------------------------------------------------------------------------------------------------------------------------------------------------------------------------------------------------------------------------------------------------------------------------------------------------------------------------------------------------------------------------------------------------------------------------------------------------------------------------------------------------------------------------------------------------------------------------------------------------------------------|------------|------------------|---------------------|
| Code _____                                                                                                                                                                                                                                                                                                                                                                                                                                                                                                                                                                                                                                                                                                                                                                                                                                                            | Code _____ | Code _____       | Code _____          |
| [1] Eau du robinet (à l'intérieur de l'habitation ; privée)<br>[2] Eau du robinet (à l'extérieur de l'habitation : cour/arrière-cour ; privée)<br>[3] Eau du robinet (à l'extérieur de l'habitation ; publique/partagée)<br>[4] Borne-fontaine/eau courante (à l'intérieur de l'habitation ; privée)<br>[5] Borne-fontaine/eau courante (à l'extérieur de l'habitation : cour/arrière-cour ; privée)<br>[6] Borne-fontaine/eau courante (à l'extérieur de l'habitation ; publique/partagée)<br>[7] Camion-citerne (public ; partagé)<br>[8] Eaux de surface (canal, canal d'irrigation)<br>[9] Eaux de surface (lac, étang, rivière, ruisseau)<br>[10] Eau de source<br>[11] Eau de pluie<br>[12] Puits/Puits de forage (en plein air/non couvert/non protégé)<br>[13] Puits/Puits de forage (couvert/protégé)<br>[14] Eau en bouteille<br>[15] Autre, préciser _____ |            |                  |                     |
|                                                                                                                                                                                                                                                                                                                                                                                                                                                                                                                                                                                                                                                                                                                                                                                                                                                                       |            | [99] Ne sait pas | [98] Pas de réponse |

**21 Les membres de ce ménage traitent-ils habituellement l'eau pour la boisson, la cuisine/la préparation des aliments/des repas, le bain, et le nettoyage (de l'habitation/des/de la structure(s) individuelle(s) d'habitation(s), des vêtements/des outils de cuisine) avant la consommation ? Comment l'eau est-elle habituellement traitée ?**

*Instruction*: Indiquer tous les codes nécessaires par catégorie ; plus d'une réponse par catégorie est possible.

| Boisson                                                                                                                                                                                                                                    | Cuisine    | Bain                                                                                                                                                                                                                 | Nettoyage           |
|--------------------------------------------------------------------------------------------------------------------------------------------------------------------------------------------------------------------------------------------|------------|----------------------------------------------------------------------------------------------------------------------------------------------------------------------------------------------------------------------|---------------------|
| Code _____                                                                                                                                                                                                                                 | Code _____ | Code _____                                                                                                                                                                                                           | Code _____          |
| [1] Non, pas du tout<br>[2] Non, seulement pour les malades du ménage<br>[3] Non, seulement selon la saison (saison sèche)<br>[4] Oui, par filtration (tissu, céramique, sable)<br>[5] Oui, par sédimentation<br>[6] Autre, préciser _____ |            |                                                                                                                                                                                                                      |                     |
|                                                                                                                                                                                                                                            |            | [7] Non, seulement pour les enfants du ménage<br>[8] Non, seulement selon la saison (saison humide)<br>[9] Oui, par ébullition<br>[10] Oui, par désinfection solaire<br>[11] Oui, par chloration<br>[99] Ne sait pas | [98] Pas de réponse |

**22 Quel(s) membre(s) de ce ménage recueille(nt) habituellement l'eau potable comme indiqué à la question 20 pour les autres membres de ce ménage ?**

*Instructions* : Se référer à la question 9 du « Formulaire 3 Partie A – Données démographiques/Informations générales sur le ménage » et indiquer/identifiant les initiales du membre.

- Membre du ménage, indiquer les initiales/identifiant(s) \_\_\_\_\_  
 99=Ne sait pas     98=Pas de réponse

**23 Comment les membres de ce ménage conservent-ils habituellement l'eau potable indiquée à la question 20?**

- |                                                                                          |                                                                                                                                   |
|------------------------------------------------------------------------------------------|-----------------------------------------------------------------------------------------------------------------------------------|
| <input type="radio"/> 1=Réservoir d'eau (non couvert)                                    | <input type="radio"/> 10=Bol (couvert par chiffon/tissu, couvercle, feuilles)                                                     |
| <input type="radio"/> 2=Réservoir d'eau (couvert par chiffon/tissu, couvercle, feuilles) | <input type="radio"/> 11=Pot en bois (non couvert)                                                                                |
| <input type="radio"/> 3=Récipient (non couvert)                                          | <input type="radio"/> 12= Pot en bois (couvert par chiffon/ tissu, couvercle, feuilles)                                           |
| <input type="radio"/> 4=Récipient (couvert par chiffon/tissu, couvercle, feuilles)       | <input type="radio"/> 13= Récipient en peau (chèvre, mouton, bovins, non couvert)                                                 |
| <input type="radio"/> 5=Pot en terre (non couvert)                                       | <input type="radio"/> 14=Récipient en peau (chèvre, mouton, bovins ; couvert par un chiffon/du tissu, un couvercle, des feuilles) |
| <input type="radio"/> 6=Pot en terre (couvert par chiffon/tissu, couvercle, feuilles)    | <input type="radio"/> 15=NON CONSERVÉE                                                                                            |
| <input type="radio"/> 7=Seau (non couvert)                                               | <input type="radio"/> 16=Autre, préciser _____                                                                                    |
| <input type="radio"/> 8=Seau (couvert par chiffon/tissu, couvercle, feuilles)            | <input type="radio"/> 99=Ne sait pas                                                                                              |
| <input type="radio"/> 9=Bol (non couvert)                                                | <input type="radio"/> 98= Pas de réponse                                                                                          |

24 Si les membres de ce ménage utilisent une source d'approvisionnement en eau potable partagée comme indiqué à la question 20, par combien de personnes cette eau potable est-elle partagée ?

- 1=<10 personnes       3=25-49 personnes       5=NON PARTAGÉE       99=Ne sait pas  
 2=11-24 personnes       4=>50 personnes       98=Pas de réponse

#### TRAITEMENT DES DÉCHETS

25 Où les membres de ce ménage jettent-ils habituellement les eaux usées de, par exemple, la cuisine/la préparation des aliments/repas, le bain et/ou le ménage, et jettent-ils habituellement les déchets domestiques, les déchets humains/déjections ?

*Instruction:* Indiquer un code par catégorie uniquement.

| Eaux usées de par exemple cuisine/préparation des aliments/repas, bain et/ou ménage                                                                                                                                                                                                                                                                                                                                                                                                                                                                                                                                                                                                                                                                                                                                                                                                                                                                                                                                                                                   | Déchets domestiques | Déchets humains/déjections |
|-----------------------------------------------------------------------------------------------------------------------------------------------------------------------------------------------------------------------------------------------------------------------------------------------------------------------------------------------------------------------------------------------------------------------------------------------------------------------------------------------------------------------------------------------------------------------------------------------------------------------------------------------------------------------------------------------------------------------------------------------------------------------------------------------------------------------------------------------------------------------------------------------------------------------------------------------------------------------------------------------------------------------------------------------------------------------|---------------------|----------------------------|
| Code _____                                                                                                                                                                                                                                                                                                                                                                                                                                                                                                                                                                                                                                                                                                                                                                                                                                                                                                                                                                                                                                                            | Code _____          | Code _____                 |
| [1] Sur le sol/surface libre proche de l'habitation (cour/arrière-cour, privé)<br>[2] Sur le sol/surface libre loin de l'habitation dans la communauté (partagé, public)<br>[3] Dans un trou proche de la maison (cour/arrière-cour, privé)<br>[4] Dans un trou loin de la maison dans la communauté (partagé, public)<br>[5] Versement dans des eaux de surface dans la communauté (lac, étang, rivière, ruisseau, public, partagé)<br>[6] Versement dans des eaux de surface dans la communauté (canal, canal d'irrigation, public, partagé)<br>[7] Versement dans de l'eau de source dans la communauté (public, partagé)<br>[8] Versement dans une fosse septique proche de l'habitation (cour/arrière-cour, proche de toilettes si disponibles, privé)<br>[9] Versement dans une fosse septique dans la communauté (partagé, public)<br>[10] Versement dans les égouts proches de la maison (cour/arrière-cour, privé)<br>[11] Versement dans les égouts dans la communauté (partagé, public)<br>[12] Autre, préciser _____ [99] Ne sait pas [98] Pas de réponse |                     |                            |

26 Les membres de ce ménage traitent-ils habituellement les déchets domestiques de la maison au préalable avant de les jeter ?

- 1=Oui, incinération des déchets       3=NON  
 2=Oui, séparation/tri des déchets dégradables et non dégradables       4=Oui, Autre, préciser \_\_\_\_\_  
 99=Ne sait pas       98=Pas de réponse

27 À quelle distance de la source d'approvisionnement en eau de ce ménage comme indiqué à la question 20 se trouve l'emplacement de l'élimination des eaux usées, des déchets domestiques et humains/excréments de ce ménage comme indiqué à la question 25 ?

*Instructions :* Indiquer un code par catégorie uniquement. Indiquer la distance en mètres [m].

| Eaux usées de, par exemple, cuisine/préparation des aliments/repas, bain et/ou ménage                                                                                             | Déchets domestiques | Déchets humains/déjections |
|-----------------------------------------------------------------------------------------------------------------------------------------------------------------------------------|---------------------|----------------------------|
| Code _____                                                                                                                                                                        | Code _____          | Code _____                 |
| [1] <5 m      [3] ≥25 à <50 m      [5] ≥100 à <500 m      [7] ≥1,000 m<br>[2] ≥5 à <25 m      [4] ≥50 à <100 m      [6] ≥500 à <1,000 m      [99] Ne sait pas [98] Pas de réponse |                     |                            |

28 À quelle distance de la source d'approvisionnement en eau principale de ce ménage pour la cuisine/la préparation des aliments/des repas comme indiqué à la question 20 se trouve l'emplacement de l'élimination des eaux usées, des déchets domestiques et humains/excréments de ce ménage comme indiqué à la question 25 ?

*Instructions :* Indiquer un code par catégorie uniquement. Indiquer la distance en mètres [m].

| Eaux usées de par exemple cuisine/préparation des aliments/repas, bain et/ou ménage | Déchets domestiques | Déchets humains/excréments |
|-------------------------------------------------------------------------------------|---------------------|----------------------------|
| Code _____                                                                          | Code _____          | Code _____                 |

|                |                  |                     |                                      |
|----------------|------------------|---------------------|--------------------------------------|
| [1] <5 m       | [3] ≥25 à <50 m  | [5] ≥100 à <500 m   | [7] ≥1,000 m                         |
| [2] ≥5 à <25 m | [4] ≥50 à <100 m | [6] ≥500 à <1,000 m | [99] Ne sait pas [98] Pas de réponse |

### ANIMAUX DE FERME/DOMESTIQUES

#### 29 Quel genre d'animaux/de bétail et d'animaux domestiques/de compagnie les membres de ce ménage possèdent-ils ?

*Instruction* : Cocher plusieurs cases par catégorie si nécessaire ; il peut y avoir plus d'une réponse par catégorie.

| Animaux de ferme/bétail                                                                     |                                                           | Animaux domestiques/de compagnie                               |
|---------------------------------------------------------------------------------------------|-----------------------------------------------------------|----------------------------------------------------------------|
| <input type="radio"/> 1=Bovin                                                               | <input type="radio"/> 9=Chameau                           | <input type="radio"/> 1=Chien                                  |
| <input type="radio"/> 2=Mouton                                                              | <input type="radio"/> 10=Rongeurs (lapin), préciser _____ | <input type="radio"/> 2=Rongeurs (lapin), préciser _____       |
| <input type="radio"/> 3=Âne                                                                 | <input type="radio"/> 11=Chèvre                           | <input type="radio"/> 3=Chat                                   |
| <input type="radio"/> 4= Volaille (i.e. poulet, canard, pigeon, oie, dinde), préciser _____ | <input type="radio"/> 12=Cheval                           | <input type="radio"/> 4=PAS D'ANIMAUX DOMESTIQUES/DE COMPAGNIE |
| <input type="radio"/> 5=Zébu                                                                | <input type="radio"/> 13=PAS D'ANIMAUX DE FERME/DE BÉTAIL | <input type="radio"/> 5=Autre, préciser _____                  |
| <input type="radio"/> 6=Cochon                                                              | <input type="radio"/> 14=Autre, préciser _____            | <input type="radio"/> 99=Ne sait pas                           |
| <input type="radio"/> 7=Poisson                                                             | <input type="radio"/> 99=Ne sait pas                      | <input type="radio"/> 98=Pas de réponse                        |
| <input type="radio"/> 8=Buffle                                                              | <input type="radio"/> 98=Pas de réponse                   |                                                                |

#### 30 Où les membres de ce ménage gardent-ils habituellement les animaux de ferme/le bétail et les animaux domestiques/de compagnie de ce ménage comme indiqué à la question 29 ?

*Instruction* : Indiquer un code par catégorie uniquement.

| Animaux de ferme/bétail                                                                                                              | Animaux domestiques/de compagnie                                                                 |
|--------------------------------------------------------------------------------------------------------------------------------------|--------------------------------------------------------------------------------------------------|
| <input type="radio"/> 1=Étable/Cage/Bassin d'eau sur la propriété de l'habitation (arrière-cour/cour)                                | <input type="radio"/> 1=Cage/Chaîne proche de l'habitation (arrière-cour/cour)                   |
| <input type="radio"/> 2=Étable/Cage/Bassin d'eau à l'extérieur de l'habitation dans la communauté                                    | <input type="radio"/> 2= Cage/Chaîne à l'extérieur de l'habitation dans la communauté            |
| <input type="radio"/> 3=Étable/Cage/Bassin d'eau à l'extérieur de la communauté                                                      | <input type="radio"/> 3= Cage/Chaîne à l'extérieur de la communauté (public)                     |
| <input type="radio"/> 4=Surface libre/Eaux de surface/Eau de source sur la propriété de l'habitation (habitation, arrière-cour/cour) | <input type="radio"/> 4=Surface libre proche de l'habitation (dans la maison, arrière-cour/cour) |
| <input type="radio"/> 5=Surface libre/Eaux de surface/Eau de source à l'extérieur de l'habitation dans la communauté                 | <input type="radio"/> 5=Surface libre à l'extérieur de l'habitation dans la communauté           |
| <input type="radio"/> 6=Surface libre/Eaux de surface/Eau de source à l'extérieur de la communauté                                   | <input type="radio"/> 6=Surface libre à l'extérieur de la communauté                             |
| <input type="radio"/> 7=Pas applicable (nulle part /pas d'animaux de ferme/bétail)                                                   | <input type="radio"/> 7=Pas applicable (nulle part/pas d'animaux domestiques/de compagnie)       |
| <input type="radio"/> 8=Autre, préciser _____                                                                                        | <input type="radio"/> 8=Autre, préciser _____                                                    |
| <input type="radio"/> 99=Ne sait pas                                                                                                 | <input type="radio"/> 99=Ne sait pas                                                             |
| <input type="radio"/> 98=Pas de réponse                                                                                              | <input type="radio"/> 98=Pas de réponse                                                          |

#### 31 Quelle est l'importance de l'élevage que les membres de ce ménage pratiquent ?

- |                                                                               |                                               |
|-------------------------------------------------------------------------------|-----------------------------------------------|
| <input type="radio"/> 1=Pour leurs propres besoins («élevage d'arrière-cour») | <input type="radio"/> 4=Autre, préciser _____ |
| <input type="radio"/> 2=Pas applicable (pas d'élevage)                        | <input type="radio"/> 99=Ne sait pas          |
| <input type="radio"/> 3=3=Demande massive/industrielle («élevage intensif»)   | <input type="radio"/> 98=Pas de réponse       |

**32 Quel approvisionnement en eau les membres de ce ménage utilisent-ils pour fournir de l'eau aux animaux de ferme/au bétail et aux animaux domestiques/de compagnie de ce ménage comme indiqué à la question 29 ?**

*Instruction* : Indiquer un code par catégorie uniquement.

| Animaux de ferme/bétail                                                                                                                                                                                                                                                                                                                                                                                                                                                                                                                                                                                                                                                                                                                                                                                                                                                                                                                                                          | Animaux domestiques/de compagnie |
|----------------------------------------------------------------------------------------------------------------------------------------------------------------------------------------------------------------------------------------------------------------------------------------------------------------------------------------------------------------------------------------------------------------------------------------------------------------------------------------------------------------------------------------------------------------------------------------------------------------------------------------------------------------------------------------------------------------------------------------------------------------------------------------------------------------------------------------------------------------------------------------------------------------------------------------------------------------------------------|----------------------------------|
| Code _____                                                                                                                                                                                                                                                                                                                                                                                                                                                                                                                                                                                                                                                                                                                                                                                                                                                                                                                                                                       | Code _____                       |
| [1] Eau du robinet (à l'intérieur de l'habitation ; privée)<br>[2] Eau du robinet (à l'extérieur de l'habitation : cour/arrière-cour ; privée)<br>[3] Eau du robinet (à l'extérieur de l'habitation ; publique/partagée)<br>[4] Borne-fontaine/eau courante (à l'intérieur de l'habitation ; privée)<br>[5] Borne-fontaine/eau courante (à l'extérieur de l'habitation : cour/arrière-cour ; privée)<br>[6] Borne-fontaine/eau courante (à l'extérieur de l'habitation ; publique/partagée)<br>[7] Camion-citerne (public ; partagé)<br>[8] Eaux de surface (canal, canal d'irrigation)<br>[9] Eaux de surface (lac, étang, rivière, ruisseau)<br>[10] Eau de source<br>[11] Eau de pluie<br>[12] Puits/Puits de forage (en plein air/non couvert/non protégé)<br>[13] Puits/Puits de forage (couvert/protégé)<br>[14] Pas applicable (pas d'animaux de ferme/bétail; pas d'animaux domestiques/de compagnie)<br>[15] Autre, préciser _____ [99] Ne sait pas [98] Pas de réponse |                                  |

**33 Les membres de ce ménage se lavent-ils habituellement les mains après avoir nourri, donné de l'eau et nettoyé l'étable/la cage/le bassin d'eau des animaux de ferme/du bétail de ce ménage comme indiqué à la question 29 ?**

*Instruction* : Indiquer un code par catégorie uniquement.

| Animaux de ferme/bétail                                                                                                                                                                                                                                                                                                                                                                                                                                                                                                      | Animaux domestiques/de compagnie |
|------------------------------------------------------------------------------------------------------------------------------------------------------------------------------------------------------------------------------------------------------------------------------------------------------------------------------------------------------------------------------------------------------------------------------------------------------------------------------------------------------------------------------|----------------------------------|
| Code _____                                                                                                                                                                                                                                                                                                                                                                                                                                                                                                                   | Code _____                       |
| [1] Lavent les mains avec du savon et de l'eau<br>[2] Lavent les mains avec de l'eau uniquement<br>[3] Frottent les mains avec des feuilles/de la paille/de l'herbe<br>[4] Frottent les mains avec du sable<br>[5] Frottent les mains avec un chiffon/du tissu<br>[6] Ne lavent pas, pas besoin/pas sale<br>[7] Ne lavent pas, rien pour laver les mains<br>[8] Autre, préciser _____<br>[9] Pas applicable (pas d'animaux de ferme/bétail ; pas d'animaux domestiques/de compagnie)<br>[99] Ne sait pas [98] Pas de réponse |                                  |

**CULTURES AGRICOLES**

**34 Quel genre de cultures les membres de ce ménage font-ils pousser/cultivent-ils ?**

*Instruction* : Cocher plusieurs cases si nécessaire ; il peut y avoir plus d'une réponse.

- |                                                                      |                                                |
|----------------------------------------------------------------------|------------------------------------------------|
| <input type="radio"/> 1=Café                                         | <input type="radio"/> 10=Tabac                 |
| <input type="radio"/> 2=Riz                                          | <input type="radio"/> 11=Canne à Sucre         |
| <input type="radio"/> 3=Fruits (cultivés sur arbustes/arbre)         | <input type="radio"/> 12=Chad/Chat             |
| <input type="radio"/> 4=Fruits (cultivés au sol)                     | <input type="radio"/> 13=Bees/Honey            |
| <input type="radio"/> 5=Légumes/salade (cultivés sur arbustes/arbre) | <input type="radio"/> 14=Coton                 |
| <input type="radio"/> 6=Légumes/salade (cultivés au sol)             | <input type="radio"/> 15=PAS DE CULTURES       |
| <input type="radio"/> 7=Céréales (blé, orge, avoine, maïs)           | <input type="radio"/> 16=Autre, préciser _____ |
| <input type="radio"/> 8=Thé                                          | <input type="radio"/> 99=Ne sait pas           |
| <input type="radio"/> 9=Noix de cajou                                | <input type="radio"/> 98=Pas de réponse        |

**35 Où les champs/terres agricoles des membres de ce ménage se situent-ils/elles?**

- |                                                                             |                                                            |
|-----------------------------------------------------------------------------|------------------------------------------------------------|
| <input type="radio"/> 1=On the property of the house (i.e. back-/courtyard) | <input type="radio"/> 4=Outside the house in the community |
| <input type="radio"/> 2=Outside the community                               | <input type="radio"/> 5=Not applicable (no crop farming)   |
| <input type="radio"/> 3=Other, specify _____                                | <input type="radio"/> 99=Don't know                        |
|                                                                             | <input type="radio"/> 98=No response                       |

**36 Quelle est l'importance des cultures des membres de ce ménage?**

- 1=Leurs propres besoins (« agriculture d'arrière-cour »)       4=Autre, préciser \_\_\_\_\_  
 2=Pas applicable (pas de cultures)       99=Ne sait pas  
 3=Demande massive/industrielle (agriculture intensive)       98= Pas de réponse

**37 Les membres de ce ménage utilisent-ils habituellement des herbicides, pesticides et engrais pour les cultures indiquées à la question 34?**

*Instruction* : Indiquer un code par catégorie uniquement.

| Herbicides                                               | Pesticides                                               | Engrais                                                  |
|----------------------------------------------------------|----------------------------------------------------------|----------------------------------------------------------|
| <input type="radio"/> 1=Oui, préciser l'herbicide        | <input type="radio"/> 1=Oui, préciser le pesticide       | <input type="radio"/> 1=Oui, préciser l'engrais          |
| <input type="radio"/> 2=Pas applicable (pas de cultures) | <input type="radio"/> 2=Pas applicable (pas de cultures) | <input type="radio"/> 2=Pas applicable (pas de cultures) |
| <input type="radio"/> 3=Pas d'utilisation des herbicides | <input type="radio"/> 3=Pas d'utilisation des pesticides | <input type="radio"/> 3=Pas d'utilisation des engrais    |
| <input type="radio"/> 99=Ne sait pas                     | <input type="radio"/> 99=Ne sait pas                     | <input type="radio"/> 99=Ne sait pas                     |
| <input type="radio"/> 98=Pas de réponse                  | <input type="radio"/> 98=Pas de réponse                  | <input type="radio"/> 98=Pas de réponse                  |

**38 Les membres de ce ménage se lavent-ils les mains après avoir travaillé dans les terres agricoles pour les cultures indiquées à la question 34 ?**

- 1=Oui, se lavent les mains avec du savon et de l'eau       6=Oui, se frottent les mains avec du sable  
 2=Oui, se frottent les mains avec des feuilles/de la paille/de l'herbe       7=Non, ne se lavent pas les mains  
 3=Oui, se frottent les mains avec des chiffons/du tissu       8=Autre, préciser \_\_\_\_\_  
 4=Pas applicable (pas de cultures)       99=Ne sait pas  
 5=Oui, se lavent les mains avec de l'eau uniquement       98= Pas de réponse

Site \_\_\_\_ Sous-zone \_\_\_\_ Numéro d'habitation \_\_\_\_ Identifiant de l'enquêteur \_\_\_\_

**FORMULAIRE 4: ÉVALUATION DE L'UTILISATION GÉNÉRIQUE DES SOINS DE SANTÉ  
GLOBAUX, STRATIFIÉE SELON L'ÂGE ET LE SEXE  
Partie A –Évaluation de l'utilisation *générique* des soins de santé**

**Instructions pour l'enquêteur**

- Compléter ce formulaire uniquement si la personne interrogée a consenti à participer (voir « Formulaire 2 — FORMULAIRE DE CONSENTEMENT ») ; la personne interrogée ainsi que définie pour cette enquête est un adulte (selon l'âge légal de majorité du pays), un membre du ménage et un décideur en ce qui concerne les soins de santé quotidiens et l'utilisation de soins de santé pour le ménage entier et ses membres ; il ne doit pas être, par exemple, un voisin ou un visiteur.
- Se référer à « Formulaire 3 — Partie A — Informations générales sur le ménage » comme référence pour obtenir le nombre total de membres du ménage ainsi que l'âge et le sexe de chaque membre du ménage.
- Recueillir les données de tous les membres du ménage que tous les membres du ménage soient présents ou non au moment de l'entretien ; ne recueillir et n'inscrire les données que des personnes présentes au moment de l'entretien fausserait les données.
- Un ménage est défini/les membres d'un ménage sont définis comme une personne ou un groupe de personnes avec ou sans lien de parenté qui vivent ensemble dans la même unité d'habitation, qui reconnaissent un adulte de sexe masculin ou féminin comme chef de ménage, qui partagent les mêmes installations domestiques, qui sont considérés comme constituant une unité, et qui subviennent à leurs besoins en termes de nourriture et des autres éléments essentiels pour vivre.
- « Site » et « sous-zone » doivent être un numéro à trois chiffres, « numéro d'habitation » un numéro à quatre chiffres, et « identifiant de l'enquêteur » un numéro à deux chiffres (utiliser les listes préparées individuellement pour chaque site pour obtenir les codes) ; saisir « date » au format JJ/MM/AAAA et « heure » au format HH:MM et entourer MATIN ou APRÈS-MIDI. «Étiquette de l'étude» doit être une combinaison d'un code «site» à trois chiffres, d'un code «sous-zone» à trois chiffres et d'un code «numéro d'habitation» à quatre chiffres; le « identifiant de l'enquêteur » doit être un numéro à trois chiffres.
- Abréviation : EDS = Établissement de santé public/privé primaire/secondaire/tertiaire.

**MEMBRES DU MÉNAGE**

**1 Indiquer le nombre total de membres du ménage de cette habitation (au jour de la visite).**

*Instructions :* Le nombre total de membres du ménage doit être indiqué à l'aide d'un numéro à 2 chiffres ; voir également « Formulaire 3 — Partie A — INFORMATIONS GÉNÉRALES SUR LE MÉNAGE ».

Nombre total de membres du ménage : \_\_\_\_

**2 Indiquer le nombre de membres FÉMININS du ménage pour chacun des groupes d'âge suivants :**

*Instructions :* Le nombre total de membres féminins du ménage par groupe d'âge doit être indiqué à l'aide d'un numéro à 2 chiffres ; voir également « Formulaire 3 — Partie A — INFORMATIONS GÉNÉRALES SUR LE MÉNAGE ».

<2 ans : \_\_\_\_ ≥2 à <5 ans : \_\_\_\_ ≥5 à <15 ans : \_\_\_\_ ≥15 ans : \_\_\_\_

**3 Indiquer le nombre de membres MASCULINS du ménage pour chacun des groupes d'âge suivants :**

*Instructions :* Le nombre total de membres masculins du ménage par groupe d'âge doit être indiqué à l'aide d'un numéro à 2 chiffres ; voir également « Formulaire 3 — Partie A — INFORMATIONS GÉNÉRALES SUR LE MÉNAGE ».

<2 ans : \_\_\_\_ ≥2 à <5 ans : \_\_\_\_ ≥5 à <15 ans : \_\_\_\_ ≥15 ans : \_\_\_\_

**COMPORTEMENT DE RECHERCHE DE SOINS DE SANTÉ**

**4 Indiquer où les membres féminins/masculins du foyer d'âges <2 ans/≥2 à <5 ans/≥5 à <15 ans/≥15 ans recherchent habituellement des soins de santé pour les signes/symptômes suivants. Merci d'attribuer une note entre 1 et 4.**

*Instructions :*

- Compléter la question 4 séparément pour les membres du ménage féminins et masculins d'âge <2 ans, ≥2 à <5 ans, ≥5 à <15 ans et ≥15 ans et entoure le sexe et le groupe d'âge pour lequel Q4 a été complétée; passer la question 4 s'il n'y a aucun membre féminin/masculin du ménage d'âge <2 ans/ ≥2 à <5 ans/ ≥5 à <15 ans/ ≥15 ans.
- Indiquer une réponse pour chaque choix de soins de santé pour chaque signe/symptôme; attribuer une note de 1 à 4 (1=1<sup>er</sup> choix; 2=2<sup>ème</sup> choix; 3=3<sup>ème</sup> choix; 4=non choisi); indiquer un code s'il y a lieu en utilisant les listes préparées (utiliser listes préparées individuellement pour chaque site pour obtenir les codes); cocher «Ne sait pas» s'il y a lieu.



| Signe/Symptôme                                              | Choix de soins de santé  |      |                          |      |                          |                          |                          |                            |                          |                       |
|-------------------------------------------------------------|--------------------------|------|--------------------------|------|--------------------------|--------------------------|--------------------------|----------------------------|--------------------------|-----------------------|
|                                                             | EDS SETA                 |      | Autre EDS                |      | Médecin                  | Pharmacie                | Guérisseur traditionnel  | Nulle part Auto-médication | Nulle part Rien          | Ne sait pas           |
|                                                             | Note                     | Code | Note                     | Code | Note                     | Note                     | Note                     | Note                       | Note                     | Cocher                |
| <b>1 [A] Fièvre</b>                                         | O=1<br>O=2<br>O=3<br>O=4 |      | O=1<br>O=2<br>O=3<br>O=4 |      | O=1<br>O=2<br>O=3<br>O=4 | O=1<br>O=2<br>O=3<br>O=4 | O=1<br>O=2<br>O=3<br>O=4 | O=1<br>O=2<br>O=3<br>O=4   | O=1<br>O=2<br>O=3<br>O=4 | <input type="radio"/> |
| <b>2 Fièvre &lt;3 jours (continus)</b>                      | O=1<br>O=2<br>O=3<br>O=4 |      | O=1<br>O=2<br>O=3<br>O=4 |      | O=1<br>O=2<br>O=3<br>O=4 | O=1<br>O=2<br>O=3<br>O=4 | O=1<br>O=2<br>O=3<br>O=4 | O=1<br>O=2<br>O=3<br>O=4   | O=1<br>O=2<br>O=3<br>O=4 | <input type="radio"/> |
| <b>3 Fièvre ≥3 jours (continus)</b>                         | O=1<br>O=2<br>O=3<br>O=4 |      | O=1<br>O=2<br>O=3<br>O=4 |      | O=1<br>O=2<br>O=3<br>O=4 | O=1<br>O=2<br>O=3<br>O=4 | O=1<br>O=2<br>O=3<br>O=4 | O=1<br>O=2<br>O=3<br>O=4   | O=1<br>O=2<br>O=3<br>O=4 | <input type="radio"/> |
| <b>4 Frissons<br/>Tremblements</b>                          | O=1<br>O=2<br>O=3<br>O=4 |      | O=1<br>O=2<br>O=3<br>O=4 |      | O=1<br>O=2<br>O=3<br>O=4 | O=1<br>O=2<br>O=3<br>O=4 | O=1<br>O=2<br>O=3<br>O=4 | O=1<br>O=2<br>O=3<br>O=4   | O=1<br>O=2<br>O=3<br>O=4 | <input type="radio"/> |
| <b>5 Convulsion</b>                                         | O=1<br>O=2<br>O=3<br>O=4 |      | O=1<br>O=2<br>O=3<br>O=4 |      | O=1<br>O=2<br>O=3<br>O=4 | O=1<br>O=2<br>O=3<br>O=4 | O=1<br>O=2<br>O=3<br>O=4 | O=1<br>O=2<br>O=3<br>O=4   | O=1<br>O=2<br>O=3<br>O=4 | <input type="radio"/> |
| <b>6 Perte de poids</b>                                     | O=1<br>O=2<br>O=3<br>O=4 |      | O=1<br>O=2<br>O=3<br>O=4 |      | O=1<br>O=2<br>O=3<br>O=4 | O=1<br>O=2<br>O=3<br>O=4 | O=1<br>O=2<br>O=3<br>O=4 | O=1<br>O=2<br>O=3<br>O=4   | O=1<br>O=2<br>O=3<br>O=4 | <input type="radio"/> |
| <b>7 Déshydratation</b>                                     | O=1<br>O=2<br>O=3<br>O=4 |      | O=1<br>O=2<br>O=3<br>O=4 |      | O=1<br>O=2<br>O=3<br>O=4 | O=1<br>O=2<br>O=3<br>O=4 | O=1<br>O=2<br>O=3<br>O=4 | O=1<br>O=2<br>O=3<br>O=4   | O=1<br>O=2<br>O=3<br>O=4 | <input type="radio"/> |
| <b>8 Malaise<br/>Faiblesse/ Fatigue</b>                     | O=1<br>O=2<br>O=3<br>O=4 |      | O=1<br>O=2<br>O=3<br>O=4 |      | O=1<br>O=2<br>O=3<br>O=4 | O=1<br>O=2<br>O=3<br>O=4 | O=1<br>O=2<br>O=3<br>O=4 | O=1<br>O=2<br>O=3<br>O=4   | O=1<br>O=2<br>O=3<br>O=4 | <input type="radio"/> |
| <b>9 Douleurs (muscles/articulations /os)</b>               | O=1<br>O=2<br>O=3<br>O=4 |      | O=1<br>O=2<br>O=3<br>O=4 |      | O=1<br>O=2<br>O=3<br>O=4 | O=1<br>O=2<br>O=3<br>O=4 | O=1<br>O=2<br>O=3<br>O=4 | O=1<br>O=2<br>O=3<br>O=4   | O=1<br>O=2<br>O=3<br>O=4 | <input type="radio"/> |
| <b>10 Maux de tête</b>                                      | O=1<br>O=2<br>O=3<br>O=4 |      | O=1<br>O=2<br>O=3<br>O=4 |      | O=1<br>O=2<br>O=3<br>O=4 | O=1<br>O=2<br>O=3<br>O=4 | O=1<br>O=2<br>O=3<br>O=4 | O=1<br>O=2<br>O=3<br>O=4   | O=1<br>O=2<br>O=3<br>O=4 | <input type="radio"/> |
| <b>11 Vertiges/<br/>Confusion<br/>Perte de connaissance</b> | O=1<br>O=2<br>O=3<br>O=4 |      | O=1<br>O=2<br>O=3<br>O=4 |      | O=1<br>O=2<br>O=3<br>O=4 | O=1<br>O=2<br>O=3<br>O=4 | O=1<br>O=2<br>O=3<br>O=4 | O=1<br>O=2<br>O=3<br>O=4   | O=1<br>O=2<br>O=3<br>O=4 | <input type="radio"/> |
| <b>12 Troubles de la pression artérielle</b>                | O=1<br>O=2<br>O=3<br>O=4 |      | O=1<br>O=2<br>O=3<br>O=4 |      | O=1<br>O=2<br>O=3<br>O=4 | O=1<br>O=2<br>O=3<br>O=4 | O=1<br>O=2<br>O=3<br>O=4 | O=1<br>O=2<br>O=3<br>O=4   | O=1<br>O=2<br>O=3<br>O=4 | <input type="radio"/> |
| <b>13 Troubles cardiaques</b>                               | O=1<br>O=2<br>O=3<br>O=4 |      | O=1<br>O=2<br>O=3<br>O=4 |      | O=1<br>O=2<br>O=3<br>O=4 | O=1<br>O=2<br>O=3<br>O=4 | O=1<br>O=2<br>O=3<br>O=4 | O=1<br>O=2<br>O=3<br>O=4   | O=1<br>O=2<br>O=3<br>O=4 | <input type="radio"/> |

| Signe/Symptôme                                                                                  | Choix de soins de santé |      |           |      |         |           |                         |                            |                 |             |
|-------------------------------------------------------------------------------------------------|-------------------------|------|-----------|------|---------|-----------|-------------------------|----------------------------|-----------------|-------------|
|                                                                                                 | EDS SETA                |      | Autre EDS |      | Médecin | Pharmacie | Guérisseur traditionnel | Nulle part Auto-médication | Nulle part Rien | Ne sait pas |
|                                                                                                 | Note                    | Code | Note      | Code | Note    | Note      | Note                    | Note                       | Note            | Cocher      |
| <b>14</b> Nausée<br>Vomissements                                                                | O=1                     |      | O=1       |      | O=1     | O=1       | O=1                     | O=1                        | O=1             | ○           |
|                                                                                                 | O=2                     |      | O=2       |      | O=2     | O=2       | O=2                     | O=2                        | O=2             |             |
|                                                                                                 | O=3                     |      | O=3       |      | O=3     | O=3       | O=3                     | O=3                        | O=3             |             |
|                                                                                                 | O=4                     |      | O=4       |      | O=4     | O=4       | O=4                     | O=4                        | O=4             |             |
| <b>15</b> Diarrhée<br>(liquide/sanglante/<br>mucopurulente)                                     | O=1                     |      | O=1       |      | O=1     | O=1       | O=1                     | O=1                        | O=1             | ○           |
|                                                                                                 | O=2                     |      | O=2       |      | O=2     | O=2       | O=2                     | O=2                        | O=2             |             |
|                                                                                                 | O=3                     |      | O=3       |      | O=3     | O=3       | O=3                     | O=3                        | O=3             |             |
|                                                                                                 | O=4                     |      | O=4       |      | O=4     | O=4       | O=4                     | O=4                        | O=4             |             |
| <b>16</b> Douleur<br>abdominale<br>Douleur intestinale                                          | O=1                     |      | O=1       |      | O=1     | O=1       | O=1                     | O=1                        | O=1             | ○           |
|                                                                                                 | O=2                     |      | O=2       |      | O=2     | O=2       | O=2                     | O=2                        | O=2             |             |
|                                                                                                 | O=3                     |      | O=3       |      | O=3     | O=3       | O=3                     | O=3                        | O=3             |             |
|                                                                                                 | O=4                     |      | O=4       |      | O=4     | O=4       | O=4                     | O=4                        | O=4             |             |
| <b>17</b> Perte de sang/<br>Hémorragie<br>(interne)                                             | O=1                     |      | O=1       |      | O=1     | O=1       | O=1                     | O=1                        | O=1             | ○           |
|                                                                                                 | O=2                     |      | O=2       |      | O=2     | O=2       | O=2                     | O=2                        | O=2             |             |
|                                                                                                 | O=3                     |      | O=3       |      | O=3     | O=3       | O=3                     | O=3                        | O=3             |             |
|                                                                                                 | O=4                     |      | O=4       |      | O=4     | O=4       | O=4                     | O=4                        | O=4             |             |
| <b>18</b> Perte de sang/<br>Hémorragie<br>(externe)                                             | O=1                     |      | O=1       |      | O=1     | O=1       | O=1                     | O=1                        | O=1             | ○           |
|                                                                                                 | O=2                     |      | O=2       |      | O=2     | O=2       | O=2                     | O=2                        | O=2             |             |
|                                                                                                 | O=3                     |      | O=3       |      | O=3     | O=3       | O=3                     | O=3                        | O=3             |             |
|                                                                                                 | O=4                     |      | O=4       |      | O=4     | O=4       | O=4                     | O=4                        | O=4             |             |
| <b>19</b> Éternuements<br>Nez qui coule                                                         | O=1                     |      | O=1       |      | O=1     | O=1       | O=1                     | O=1                        | O=1             | ○           |
|                                                                                                 | O=2                     |      | O=2       |      | O=2     | O=2       | O=2                     | O=2                        | O=2             |             |
|                                                                                                 | O=3                     |      | O=3       |      | O=3     | O=3       | O=3                     | O=3                        | O=3             |             |
|                                                                                                 | O=4                     |      | O=4       |      | O=4     | O=4       | O=4                     | O=4                        | O=4             |             |
| <b>20</b> Toux                                                                                  | O=1                     |      | O=1       |      | O=1     | O=1       | O=1                     | O=1                        | O=1             | ○           |
|                                                                                                 | O=2                     |      | O=2       |      | O=2     | O=2       | O=2                     | O=2                        | O=2             |             |
|                                                                                                 | O=3                     |      | O=3       |      | O=3     | O=3       | O=3                     | O=3                        | O=3             |             |
|                                                                                                 | O=4                     |      | O=4       |      | O=4     | O=4       | O=4                     | O=4                        | O=4             |             |
| <b>21</b> Respiration<br>rapide/<br>essoufflement                                               | O=1                     |      | O=1       |      | O=1     | O=1       | O=1                     | O=1                        | O=1             | ○           |
|                                                                                                 | O=2                     |      | O=2       |      | O=2     | O=2       | O=2                     | O=2                        | O=2             |             |
|                                                                                                 | O=3                     |      | O=3       |      | O=3     | O=3       | O=3                     | O=3                        | O=3             |             |
|                                                                                                 | O=4                     |      | O=4       |      | O=4     | O=4       | O=4                     | O=4                        | O=4             |             |
| <b>22</b> Difficultés<br>respiratoires<br>graves                                                | O=1                     |      | O=1       |      | O=1     | O=1       | O=1                     | O=1                        | O=1             | ○           |
|                                                                                                 | O=2                     |      | O=2       |      | O=2     | O=2       | O=2                     | O=2                        | O=2             |             |
|                                                                                                 | O=3                     |      | O=3       |      | O=3     | O=3       | O=3                     | O=3                        | O=3             |             |
|                                                                                                 | O=4                     |      | O=4       |      | O=4     | O=4       | O=4                     | O=4                        | O=4             |             |
| <b>23</b> Inflammation<br>de la peau<br>(éruptions cutanées/<br>rougeurs/pus/<br>démangeaisons) | O=1                     |      | O=1       |      | O=1     | O=1       | O=1                     | O=1                        | O=1             | ○           |
|                                                                                                 | O=2                     |      | O=2       |      | O=2     | O=2       | O=2                     | O=2                        | O=2             |             |
|                                                                                                 | O=3                     |      | O=3       |      | O=3     | O=3       | O=3                     | O=3                        | O=3             |             |
|                                                                                                 | O=4                     |      | O=4       |      | O=4     | O=4       | O=4                     | O=4                        | O=4             |             |
| <b>24</b> Gonflement/<br>Œdème                                                                  | O=1                     |      | O=1       |      | O=1     | O=1       | O=1                     | O=1                        | O=1             | ○           |
|                                                                                                 | O=2                     |      | O=2       |      | O=2     | O=2       | O=2                     | O=2                        | O=2             |             |
|                                                                                                 | O=3                     |      | O=3       |      | O=3     | O=3       | O=3                     | O=3                        | O=3             |             |
|                                                                                                 | O=4                     |      | O=4       |      | O=4     | O=4       | O=4                     | O=4                        | O=4             |             |
| <b>25</b> Jaunisse                                                                              | O=1                     |      | O=1       |      | O=1     | O=1       | O=1                     | O=1                        | O=1             | ○           |
|                                                                                                 | O=2                     |      | O=2       |      | O=2     | O=2       | O=2                     | O=2                        | O=2             |             |
|                                                                                                 | O=3                     |      | O=3       |      | O=3     | O=3       | O=3                     | O=3                        | O=3             |             |
|                                                                                                 | O=4                     |      | O=4       |      | O=4     | O=4       | O=4                     | O=4                        | O=4             |             |

Site \_\_\_\_\_ Sous-zone \_\_\_\_\_ Numéro d'habitation \_\_\_\_\_ Identifiant de l'enquêteur \_\_\_\_\_

## FORMULAIRE 4: ÉVALUATION DE L'UTILISATION GÉNÉRIQUE DES SOINS DE SANTÉ GLOBAUX, STRATIFIÉE SELON L'ÂGE ET LE SEXE

### Partie B – Facteurs associés aux soins de santé/Vaccination/Percéption de la maladie

#### DÉPLACEMENT À L'ÉTABLISSEMENT DE SANTÉ

- 1 Au cas où un établissement de santé (EDS) a été noté comme 1<sup>er</sup> choix de soins à la question 4A (fièvre), quel est habituellement le moyen de transport principal, le temps de trajet (selon le moyen de transport), le coût du trajet (selon le moyen de transport) et la distance du trajet (selon le moyen de transport) pour s'y rendre ?**

*Instructions* : Indiquer uniquement un code par catégorie, sexe ainsi que groupe d'âge. Passer cette question s'il n'y a pas de membre féminin/masculin d'âge <2 ans/≥2 à <5 ans/≥5 à <15 ans/≥15 ans dans ce ménage (voir également questions 2 et 3 de ce formulaire Partie A). Passer cette question si aucun EDS n'a été noté comme 1<sup>er</sup> choix de soins à la question 4A pour les membres masculins/féminins d'âge <2 ans/≥2 à <5 ans/≥5 à <15 ans/≥15 ans. Indiquer le temps de trajet en minute(s) [min]/ heure(s) [h], le coût total en USD, y compris les cadeaux éventuels, les aides financières et les dons, et la distance totale en mètre(s) [m]/kilomètre(s) [km].

| Membre féminin                                        |             |                      |            | Membre masculin          |             |                     |            |
|-------------------------------------------------------|-------------|----------------------|------------|--------------------------|-------------|---------------------|------------|
| <2 ans                                                | ≥2 à <5 ans | ≥5 à <15 ans         | ≥15 ans    | <2 ans                   | ≥2 à <5 ans | ≥5 à <15 ans        | ≥15 ans    |
| <b>1.1 Moyen de transport</b>                         |             |                      |            |                          |             |                     |            |
| Code _____                                            | Code _____  | Code _____           | Code _____ | Code _____               | Code _____  | Code _____          | Code _____ |
| [1] Private transportation (i.e. motorbike, car, bus) |             | [3] Walking          |            | [5] Other, specify _____ |             |                     |            |
| [2] Public transportation (i.e. motorbike, car, bus)  |             | [4] Bicycle          |            | [99] Don't know          |             | [98] No response    |            |
| <b>1.2 Temps de trajet</b>                            |             |                      |            |                          |             |                     |            |
| Code _____                                            | Code _____  | Code _____           | Code _____ | Code _____               | Code _____  | Code _____          | Code _____ |
| [1] <30 min                                           |             | [3] ≥1.0 à <2.0 h    |            | [5] ≥3.0 à <4.0 h        |             | [99] Ne sait pas    |            |
| [2] ≥30 à <60 min                                     |             | [4] ≥2.0 à <3.0 h    |            | [6] ≥4.0h                |             | [98] Pas de réponse |            |
| <b>1.3 Coût du transport</b>                          |             |                      |            |                          |             |                     |            |
| Code _____                                            | Code _____  | Code _____           | Code _____ | Code _____               | Code _____  | Code _____          | Code _____ |
| [1] <1.0 USD                                          |             | [3] ≥3.0 à <5.0 USD  |            | [5] ≥10.0 USD            |             | [99] Ne sait pas    |            |
| [2] ≥1.0 à <3.0 USD                                   |             | [4] ≥5.0 à <10.0 USD |            | [98] Pas de réponse      |             |                     |            |
| <b>1.4 Distance du trajet</b>                         |             |                      |            |                          |             |                     |            |
| Code _____                                            | Code _____  | Code _____           | Code _____ | Code _____               | Code _____  | Code _____          | Code _____ |
| [1] <500 m                                            |             | [3] ≥1.0 à <2.0 km   |            | [5] ≥3.0 à <4.0 km       |             | [99] Ne sait pas    |            |
| [2] ≥500 m à <1.0 km                                  |             | [4] ≥2.0 à <3.0 km   |            | [6] ≥4.0 km              |             | [98] Pas de réponse |            |

#### **ASSURANCE**

- 2 Pour quels membres de ce ménage l'assurance couvre-t-elle les dépenses de santé ?**

*Instructions* : Indiquer un code par catégorie. Passer cette question s'il n'y a aucun membre d'âge <2 ans/≥2 à <5 ans/≥5 à <15 ans/≥15 ans dans ce ménage (voir questions 2 et 3 de ce formulaire partie A).

| <2 ans     | ≥2 à <5 ans | ≥5 à <15 ans     | ≥15 ans             |
|------------|-------------|------------------|---------------------|
| Code _____ | Code _____  | Code _____       | Code _____          |
| [1] Oui    | [2] Non     | [99] Ne sait pas | [98] Pas de réponse |

- 3 Quels types de dépenses de santé sont habituellement couverts par l'assurance pour les membres de ce ménage ?**

*Instructions* : Indiquer uniquement un code par catégorie et par groupe d'âge. Passer cette question s'il n'y a aucun membre d'âge <2 ans/≥2 à <5 ans/≥5 à <15 ans/≥15 ans dans ce ménage (voir également les questions 2 et 3 de ce formulaire partie

A). Passer cette question s'il n'y a aucune assurance qui couvre les dépenses de santé des membres d'âge <2 ans/≥2 à <5 ans/≥5 à <15 ans/≥15 ans.

|                                                                                           | <2 ans          | ≥2 à <5 ans | ≥5 à <15 ans     | ≥15 ans     |
|-------------------------------------------------------------------------------------------|-----------------|-------------|------------------|-------------|
|                                                                                           | [1] Oui réponse | [2] Non     | [99] Ne sait pas | [98] Pas de |
| <b>1</b> Inscription                                                                      | Code _____      | Code _____  | Code _____       | Code _____  |
| <b>2</b> Consultation/Visite chez le médecin                                              | Code _____      | Code _____  | Code _____       | Code _____  |
| <b>3</b> Examen physique - général                                                        | Code _____      | Code _____  | Code _____       | Code _____  |
| <b>4</b> Examen physique – spécifique, préciser _____                                     | Code _____      | Code _____  | Code _____       | Code _____  |
| <b>5</b> Diagnostics - diagnostics généraux de laboratoire                                | Code _____      | Code _____  | Code _____       | Code _____  |
| <b>6</b> Diagnostics – diagnostics spécifiques de laboratoire, préciser _____             | Code _____      | Code _____  | Code _____       | Code _____  |
| <b>7</b> Diagnostics Imagerie générale                                                    | Code _____      | Code _____  | Code _____       | Code _____  |
| <b>8</b> Diagnostics Imagerie spécifique, préciser _____                                  | Code _____      | Code _____  | Code _____       | Code _____  |
| <b>9</b> Diagnostics Autre, préciser _____                                                | Code _____      | Code _____  | Code _____       | Code _____  |
| <b>10</b> Traitement Médication générale                                                  | Code _____      | Code _____  | Code _____       | Code _____  |
| <b>11</b> Traitement Médication spécifique, préciser _____                                | Code _____      | Code _____  | Code _____       | Code _____  |
| <b>12</b> Traitement Autre médication, préciser _____                                     | Code _____      | Code _____  | Code _____       | Code _____  |
| <b>13</b> Traitement Interventions (autres que chirurgie), préciser _____                 | Code _____      | Code _____  | Code _____       | Code _____  |
| <b>14</b> Traitement Chirurgie                                                            | Code _____      | Code _____  | Code _____       | Code _____  |
| <b>15</b> Hospitalisation <7 jours                                                        | Code _____      | Code _____  | Code _____       | Code _____  |
| <b>16</b> Hospitalisation ≥7 jours                                                        | Code _____      | Code _____  | Code _____       | Code _____  |
| <b>17</b> Services d'urgence                                                              | Code _____      | Code _____  | Code _____       | Code _____  |
| <b>18</b> Soins prénatals                                                                 | Code _____      | Code _____  | Code _____       | Code _____  |
| <b>19</b> Soins postnatals                                                                | Code _____      | Code _____  | Code _____       | Code _____  |
| <b>20</b> Médecine préventive                                                             | Code _____      | Code _____  | Code _____       | Code _____  |
| <b>21</b> Vaccination                                                                     | Code _____      | Code _____  | Code _____       | Code _____  |
| <b>22</b> Soins à domicile (personnes âgées, handicapés, malades chroniques/à long terme) | Code _____      | Code _____  | Code _____       | Code _____  |

|                                                                              |            |            |            |            |
|------------------------------------------------------------------------------|------------|------------|------------|------------|
| <b>23</b> Thérapie de soutien (physiothérapie, ergothérapie, réhabilitation) | Code _____ | Code _____ | Code _____ | Code _____ |
|------------------------------------------------------------------------------|------------|------------|------------|------------|

### ETHNOGRAPHIE

#### 4 À quelle religion/groupe ethnique/tribu appartient les membres de ce ménage ?

*Instructions :* Donner une réponse par groupe d'âge uniquement. Passer cette question s'il n'y a aucun membre d'âge >2 ans/≥2 à <5 ans/≥5 à <15 ans/≥15 ans dans ce ménage (voir également questions 2 et 3 de ce formulaire Partie A).

|                                | <2 ans                                                                          | ≥2 to <5 ans                                                                    | ≥5 to <15 ans                                                                   | ≥15 ans                                                                         |
|--------------------------------|---------------------------------------------------------------------------------|---------------------------------------------------------------------------------|---------------------------------------------------------------------------------|---------------------------------------------------------------------------------|
| Religion/Groupe ethnique/Tribu | _____                                                                           | _____                                                                           | _____                                                                           | _____                                                                           |
|                                | <input type="radio"/> 99=Ne sait pas<br><input type="radio"/> 98=Pas de réponse | <input type="radio"/> 99=Ne sait pas<br><input type="radio"/> 98=Pas de réponse | <input type="radio"/> 99=Ne sait pas<br><input type="radio"/> 98=Pas de réponse | <input type="radio"/> 99=Ne sait pas<br><input type="radio"/> 98=Pas de réponse |

#### 5 La religion/le groupe ethnique/la tribu comme indiqué à la question 4 influence-t-elle/il les différents aspects de l'utilisation des soins de santé pour les membres de ce ménage ?

*Instructions :* Indiquer un code par catégorie et groupe d'âge uniquement. Passer cette question s'il y a un membre d'âge >2 ans/≥2 à <5 ans/≥5 à <15 ans/≥15 ans dans ce ménage (voir également questions 2 t 3 de ce formulaire Partie A).

|                                                                                                          | <2 ans     | ≥2 à <5 ans | ≥5 to <15 ans    | ≥15 ans          |
|----------------------------------------------------------------------------------------------------------|------------|-------------|------------------|------------------|
|                                                                                                          | [1] Oui    | [2] Non     | [99] Ne sait pas | [98] pas réponse |
| <b>1</b> Visite dans un établissement de santé (hôpital, centre de soins, poste de santé)                | Code _____ | Code _____  | Code _____       | Code _____       |
| <b>2</b> Visite chez un médecin                                                                          | Code _____ | Code _____  | Code _____       | Code _____       |
| <b>3</b> Visite dans une pharmacie                                                                       | Code _____ | Code _____  | Code _____       | Code _____       |
| <b>4</b> Visite chez un guérisseur traditionnel                                                          | Code _____ | Code _____  | Code _____       | Code _____       |
| <b>5</b> Décision d'automédication                                                                       | Code _____ | Code _____  | Code _____       | Code _____       |
| <b>6</b> Décision de non traitement                                                                      | Code _____ | Code _____  | Code _____       | Code _____       |
| <b>7</b> Examen physique - général                                                                       | Code _____ | Code _____  | Code _____       | Code _____       |
| <b>8</b> Examen physique – spécifique, préciser _____                                                    | Code _____ | Code _____  | Code _____       | Code _____       |
| <b>9</b> Prélèvements d'échantillons (sang, urine, selles, frottis, écouvillons, liquide cérebro-spinal) | Code _____ | Code _____  | Code _____       | Code _____       |
| <b>10</b> Diagnostics - diagnostics généraux de laboratoire                                              | Code _____ | Code _____  | Code _____       | Code _____       |
| <b>11</b> Diagnostics – diagnostics spécifiques de laboratoire, préciser _____                           | Code _____ | Code _____  | Code _____       | Code _____       |
| <b>12</b> Diagnostics Imagerie générale                                                                  | Code _____ | Code _____  | Code _____       | Code _____       |
| <b>13</b> Diagnostics Imagerie spécifique, préciser _____                                                | Code _____ | Code _____  | Code _____       | Code _____       |
| <b>14</b> Diagnostics Autre, préciser _____                                                              | Code _____ | Code _____  | Code _____       | Code _____       |
| <b>15</b> Traitement Médication générale                                                                 | Code _____ | Code _____  | Code _____       | Code _____       |
| <b>16</b> Traitement Médication spécifique, préciser _____                                               | Code _____ | Code _____  | Code _____       | Code _____       |

|                                                                                                 |            |            |            |            |
|-------------------------------------------------------------------------------------------------|------------|------------|------------|------------|
| <b>17</b> Traitement<br>Autre médication, préciser _____                                        | Code _____ | Code _____ | Code _____ | Code _____ |
| <b>18</b> Traitement<br>Interventions (autres que chirurgie),<br>préciser _____                 | Code _____ | Code _____ | Code _____ | Code _____ |
| <b>19</b> Traitement<br>Chirurgie                                                               | Code _____ | Code _____ | Code _____ | Code _____ |
| <b>20</b> Hospitalisation<br><7 jours                                                           | Code _____ | Code _____ | Code _____ | Code _____ |
| <b>21</b> Hospitalisation<br>≥7 jours                                                           | Code _____ | Code _____ | Code _____ | Code _____ |
| <b>22</b> Services d'urgence                                                                    | Code _____ | Code _____ | Code _____ | Code _____ |
| <b>23</b> Soins prénatals                                                                       | Code _____ | Code _____ | Code _____ | Code _____ |
| <b>24</b> Soins postnatals                                                                      | Code _____ | Code _____ | Code _____ | Code _____ |
| <b>25</b> Médecine préventive                                                                   | Code _____ | Code _____ | Code _____ | Code _____ |
| <b>26</b> Vaccination                                                                           | Code _____ | Code _____ | Code _____ | Code _____ |
| <b>27</b> Soins à domicile (personnes âgées,<br>handicapés, malades chroniques/à long<br>terme) | Code _____ | Code _____ | Code _____ | Code _____ |
| <b>28</b> Thérapie de soutien (physiothérapie,<br>ergothérapie, réhabilitation)                 | Code _____ | Code _____ | Code _____ | Code _____ |

### VACCINATION

#### 6 Comment les enfants de ce ménage ont-ils été nourris pendant les 6 premiers mois de leur vie ?

*Instructions :* Passer cette question s'il n'y a pas d'enfants de sexe masculin ou féminin dans ce ménage (voir également questions 2 et 3 de ce formulaire partie A).

- 1=Lait maternisé exclusivement  
 2=Lait maternisé et autres aliments, préciser \_\_\_\_\_  
 3=Allaitement et autres aliments, préciser \_\_\_\_\_  
 4=Lait maternisé et allaitement  
 5=Allaitement exclusivement  
 6=Autre, préciser \_\_\_\_\_  
 99=Ne sait pas  
 98=Pas de réponse

#### 7 Quelle source d'approvisionnement en eau était-elle habituellement utilisée pour préparer le lait maternisé ou le lait maternisé et d'autres aliments comme indiqué à la question 6 pour les enfants de ce ménage ?

*Instructions :* Passer cette question s'il n'y a pas d'enfants dans ce ménage (voir également les questions 2 et 3 de ce formulaire Partie A).

- 1=Eau du robinet (à l'intérieur de l'habitation, privé)  
 2=Eau du robinet (à l'extérieur de l'habitation, arrière- cour/cour, privé)  
 3=Eau du robinet (à l'extérieur de l'habitation, public, partagé)  
 4=Borne-fontaine/Eau courante (à l'intérieur de l'habitation, privé)  
 5=Borne-fontaine/Eau courante (à l'extérieur de l'habitation, arrière- cour/cour, privé)  
 6=Borne-fontaine/Eau courante (à l'extérieur de l'habitation, public, partagé)  
 7=Camion-citerne (public, partagé)  
 8=Eau en bouteille  
 9=Eaux de surface (lac, étang, rivière, ruisseau)  
 10=Eaux de surface (canal, canal d'irrigation)  
 11=Eau de source  
 12=Eau de pluie  
 13=Puits/Puits de forage (ouvert/non couvert/non protégé)  
 14=Puits/Puits de forage (couvert/protégé)  
 15=NO FORMULA/OTHER FEEDS PREPARED  
 16=Autre, préciser \_\_\_\_\_  
 99=Ne sait pas  
 98=Pas de réponse

## 8 Est-ce que les enfants de ce ménage ont été vaccinés depuis leur naissance, y compris les vaccins de naissance ?

*Instructions :* Indiquer un code par catégorie et par enfant uniquement. Passer cette question s'il n'y a aucun enfant dans ce ménage (voir également les questions 2 et 3 de ce formulaire Partie A). Se référer à la question 9 « Formulaire 3 Partie A – Données démographiques/Informations générales sur le ménage » et indiquer les initiales/identificateur du/des membre(s).

| Enfant 1<br>Initiales/Identifiant :                                                                                                                                 | Enfant 2<br>Initiales/Identifiant : | Enfant 3<br>Initiales/Identifiant :   | Enfant 4<br>Initiales/Identifiant :          |
|---------------------------------------------------------------------------------------------------------------------------------------------------------------------|-------------------------------------|---------------------------------------|----------------------------------------------|
| [1] OUI, vacciné                                                                                                                                                    | [5] Non, manque de vaccins          | [9] Non, EDS débordé                  | [10] Non, enfant malade                      |
| [2] Non, parent/tuteur débordé                                                                                                                                      | [6] Non, enfant trop jeune/vieux    | [11] Non, pas de carte de vaccination | [7] Non, parent/tuteur a refusé/trop inquiet |
| [3] Non, parent/tuteur a décidé que pas nécessaire                                                                                                                  | [8] Non, Autre, préciser _____      | [99] Don't know                       | [4] Non, ne sait pas où aller                |
| [4] Non, ne sait pas où aller                                                                                                                                       | [8] Non, Autre, préciser _____      | [99] Don't know                       | [98] No response                             |
| <b>8.1 Diphtérie et tétanos et coqueluche et <i>Haemophilus influenzae</i> et vaccin contre l'hépatite B / DTwPHibHepB</b> (par exemple 6/8, 10/12, 14/16 semaines) |                                     |                                       |                                              |
| Code _____                                                                                                                                                          | Code _____                          | Code _____                            | Code _____                                   |
| <b>8.2 Anatoxine tétanique (TT)</b> (par exemple, 1er contact, grossesse, 1, 6, 12/24 mois)                                                                         |                                     |                                       |                                              |
| Code _____                                                                                                                                                          | Code _____                          | Code _____                            | Code _____                                   |
| <b>8.3 Anatoxine tétanique et diphtérique (TD)</b> (par exemple, grossesse avec un premier contact, 1, 6, 12 mois)                                                  |                                     |                                       |                                              |
| Code _____                                                                                                                                                          | Code _____                          | Code _____                            | Code _____                                   |
| <b>8.4 Tuberculose / BCG</b> (à la naissance)                                                                                                                       |                                     |                                       |                                              |
| Code _____                                                                                                                                                          | Code _____                          | Code _____                            | Code _____                                   |
| <b>8.5 Rotavirus / RV</b> (par exemple 6/8, 10/12, 16 semaines)                                                                                                     |                                     |                                       |                                              |
| Code _____                                                                                                                                                          | Code _____                          | Code _____                            | Code _____                                   |
| <b>8.6 Rougeole / rougeole et rubéole (MR)</b> (par exemple 9, 15/18 mois)                                                                                          |                                     |                                       |                                              |
| Code _____                                                                                                                                                          | Code _____                          | Code _____                            | Code _____                                   |
| <b>8.7 Polio / VPO</b> (par exemple naissance, 6/8, 10/12, 14/16 semaines)                                                                                          |                                     |                                       |                                              |
| Code _____                                                                                                                                                          | Code _____                          | Code _____                            | Code _____                                   |
| <b>8.8 Pneumocoque / PCV</b> (par exemple 6/8, 10/12, 14/16 semaines)                                                                                               |                                     |                                       |                                              |
| Code _____                                                                                                                                                          | Code _____                          | Code _____                            | Code _____                                   |
| <b>8.9 Fièvre jaune (YF)</b> (par exemple 9 mois)                                                                                                                   |                                     |                                       |                                              |
| Code _____                                                                                                                                                          | Code _____                          | Code _____                            | Code _____                                   |
| <b>8.10 Autres vaccins</b>                                                                                                                                          |                                     |                                       |                                              |
| Préciser, _____                                                                                                                                                     | Préciser, _____                     | Préciser, _____                       | Préciser, _____                              |
| Préciser, _____                                                                                                                                                     | Préciser, _____                     | Préciser, _____                       | Préciser, _____                              |

|                 |                 |                 |                 |
|-----------------|-----------------|-----------------|-----------------|
| Préciser, _____ | Préciser, _____ | Préciser, _____ | Préciser, _____ |
| Préciser, _____ | Préciser, _____ | Préciser, _____ | Préciser, _____ |

For peer review only



**PERCEPTION DE LA MALADIE****9 Connaissance, perception, causes et prévention des maladies infectieuses communes**

| Maladie                   | <b>9.1 Maladie connue des membres du ménage ?</b><br>[1] Oui<br>[2] Non<br>[99] Ne sait pas<br>[98] Pas de réponse | <b>9.2 Perception de la maladie par les membres du ménage</b><br><i>Instruction</i> : Décrire brièvement si elle est connue. | <b>9.3 Causes de la maladie connue des membres du ménage ?</b><br><i>Instructions</i> : Indiquer tous les codes (liste A) qui s'appliquent; plus d'une réponse est possible | <b>9.4 Mesures pour prévenir la maladie connues des membres du ménage ?</b><br><i>Instructions</i> : Indiquer tous les codes (liste B) qui s'appliquent ; plus d'une réponse est possible. | <b>9.5 Mesures pour prévenir la maladie utilisées par les membres du foyer ?</b><br><i>Instructions</i> : Indiquer tous les codes (liste B) qui s'appliquent ; il peut y avoir plus d'une réponse. |
|---------------------------|--------------------------------------------------------------------------------------------------------------------|------------------------------------------------------------------------------------------------------------------------------|-----------------------------------------------------------------------------------------------------------------------------------------------------------------------------|--------------------------------------------------------------------------------------------------------------------------------------------------------------------------------------------|----------------------------------------------------------------------------------------------------------------------------------------------------------------------------------------------------|
| <b>A.</b> Fièvre typhoïde | Code _____                                                                                                         |                                                                                                                              | Code _____                                                                                                                                                                  | Code _____                                                                                                                                                                                 | Code _____                                                                                                                                                                                         |
| <b>B.</b> Choléra         | Code _____                                                                                                         |                                                                                                                              | Code _____                                                                                                                                                                  | Code _____                                                                                                                                                                                 | Code _____                                                                                                                                                                                         |
| <b>C.</b> Paludisme       | Code _____                                                                                                         |                                                                                                                              | Code _____                                                                                                                                                                  | Code _____                                                                                                                                                                                 | Code _____                                                                                                                                                                                         |
| <b>D.</b> Grippe          | Code _____                                                                                                         |                                                                                                                              | Code _____                                                                                                                                                                  | Code _____                                                                                                                                                                                 | Code _____                                                                                                                                                                                         |
| <b>E.</b> Méningite       | Code _____                                                                                                         |                                                                                                                              | Code _____                                                                                                                                                                  | Code _____                                                                                                                                                                                 | Code _____                                                                                                                                                                                         |
| <b>F.</b> Hépatite E      | Code _____                                                                                                         |                                                                                                                              | Code _____                                                                                                                                                                  | Code _____                                                                                                                                                                                 | Code _____                                                                                                                                                                                         |
| <b>G.</b> Tuberculose     | Code _____                                                                                                         |                                                                                                                              | Code _____                                                                                                                                                                  | Code _____                                                                                                                                                                                 | Code _____                                                                                                                                                                                         |
| <b>H.</b> VIH/SIDA        | Code _____                                                                                                         |                                                                                                                              | Code _____                                                                                                                                                                  | Code _____                                                                                                                                                                                 | Code _____                                                                                                                                                                                         |

|                           |                                        |
|---------------------------|----------------------------------------|
| Liste A: Causes possibles | Liste B: Mesures préventives possibles |
| [1] Consommation d'alcool | [1] Pas de consommation d'alcool       |

|                                                                                                                                                   |                                                                                                                                                               |
|---------------------------------------------------------------------------------------------------------------------------------------------------|---------------------------------------------------------------------------------------------------------------------------------------------------------------|
| [2] Temps/sorcellerie                                                                                                                             | [2] Dormir sous une moustiquaire                                                                                                                              |
| [3] Piqûre de moustique/d'insecte                                                                                                                 | [3] Utiliser des sprays insecticides/anti-moustiques                                                                                                          |
| [4] Morsure de chien                                                                                                                              | [4] Maintenir la maison et ses environs immédiats propres                                                                                                     |
| [5] Boire de l'eau non traitée de surface/de source (lac, étang, rivière, ruisseau, canal, canal d'irrigation)                                    | [5] Avoir une pratique correcte de l'élimination des déchets humains et domestiques                                                                           |
| [6] Contact physique étroit/baiser/embrassade                                                                                                     | [6] Éviter le contact rapproché avec des chiens                                                                                                               |
| [7] Manger des produits alimentaires crus comme des légumes/de la salade, des fruits, des produits laitiers, des œufs, de la viande ou du poisson | [7] Traiter l'eau (faire bouillir, filtration, désinfection solaire, sédimentation, chloration)                                                               |
| [8] Ne pas se laver les mains correctement en préparant la nourriture/les repas                                                                   | [8] Ne pas cuisiner/préparer la nourriture/les repas avec de l'eau non traitée                                                                                |
| [9] Ne pas se laver les mains correctement avant/après être allé aux toilettes                                                                    | [9] Ne pas laver les produits alimentaires à consommer crus avec de l'eau non traitée                                                                         |
| [10] Contact avec du sang humain (injection, transfusion, chirurgie)                                                                              | [10] Faire bouillir/chauffer à nouveau les restes/les aliments/repas préparés avant de les consommer                                                          |
| [11] Consommation de sang animal cru                                                                                                              | [11] Ne pas manger des produits alimentaires crus comme légumes/salade, fruits, produits laitiers, œufs, viande ou poisson                                    |
| [12] Autre, préciser _____                                                                                                                        | [12] Couvrir les produits alimentaires/repas                                                                                                                  |
| [99] Ne sait pas                                                                                                                                  | [13] Protéger les produits alimentaires/repas contre les mouches                                                                                              |
| [98] Pas de réponse                                                                                                                               | [14] Éviter la nourriture/les boissons des vendeurs de rue                                                                                                    |
|                                                                                                                                                   | [15] Éviter le contact rapproché avec les personnes malades                                                                                                   |
|                                                                                                                                                   | [16] Pas de contact physique étroit/baisers/embrassades                                                                                                       |
|                                                                                                                                                   | [17] Se couvrir le nez/la bouche en éternuant/toussant                                                                                                        |
|                                                                                                                                                   | [18] Pas de contact/consommation de sang humain/animal                                                                                                        |
|                                                                                                                                                   | [19] Avoir une bonne hygiène des mains en préparant la nourriture/les repas (se laver les mains avec du savon et de l'eau, se laver les mains par frottement) |
|                                                                                                                                                   | [20] Avoir une bonne hygiène des mains avant/après être allé aux toilettes (se laver les mains avec du savon et de l'eau, se laver les mains par frottement)  |
|                                                                                                                                                   | [21] Autre, préciser _____                                                                                                                                    |
|                                                                                                                                                   | [99] Ne sait pas                                                                                                                                              |
|                                                                                                                                                   | [98] Pas de réponse                                                                                                                                           |

**10 Pour quels membres de ce ménage les mesures préventives listées à la question 9.5 contre la fièvre typhoïde sont-elles utilisées ?**

*Instructions* : Cocher plusieurs cases si nécessaire ; il peut y avoir plus d'une réponse.

- 1=<2 ans                       3= $\geq$ 5 à <15 ans                       5=PAS UTILISÉ                       99=Ne sait pas  
 2= $\geq$ 2 à < 5 ans                       4= $\geq$ 15 ans                       98=Pas de réponse

**11 Nommer les membres du ménage pour lesquels une fièvre typhoïde a été diagnostiquée dans les 3 derniers mois. Quels éléments de diagnostic ont été utilisés pour confirmer la fièvre typhoïde?**

*Instructions* : Indiquer plusieurs codes si nécessaire pour chaque membre du ménage ; il peut y avoir plus d'une réponse.

| Membre 1<br>Initiales/Identifiant: ____ | Membre 2<br>Initiales/Identifiant: ____ | Membre 3<br>Initiales/Identifiant: ____                       | Membre 4<br>Initiales/Identifiant: ____ |
|-----------------------------------------|-----------------------------------------|---------------------------------------------------------------|-----------------------------------------|
| [1] Hémostoculture                      | [3] Test sanguin/de Widal               | [5] Pas applicable (pas diagnostiqué avec la fièvre typhoïde) |                                         |
| [2] Coproculture                        | [4] Autre test, préciser _____          | [99] Ne sait pas                                              | [98] Pas de réponse                     |
| Code _____                              | Code _____                              | Code _____                                                    | Code _____                              |

**12 (Où les membres de ce ménage indiqués à la question 11 ont-ils été diagnostiqués pour la fièvre typhoïde?) Où les membres de ce ménage ont-ils recherché des soins de santé?**

*Instructions* : Indiquer un code par membre du ménage uniquement.

| Membre 1<br>Initiales/Identifiant: ____    | Membre 2<br>Initiales/Identifiant: ____   | Membre 3<br>Initiales/Identifiant: ____ | Membre 4<br>Initiales/Identifiant: ____ |
|--------------------------------------------|-------------------------------------------|-----------------------------------------|-----------------------------------------|
| [1] Établissement de santé, préciser _____ | [6] Nulle part, pas de recherche de soins |                                         |                                         |
| [2] Médecin                                | [7] Autre, préciser _____                 |                                         |                                         |
| [3] Nulle part, automédication             | [8] Pas applicable                        |                                         |                                         |
| [4] Guérisseur traditionnel                | [99] Ne sait pas                          |                                         |                                         |
| [5] Pharmacien                             | [98] Pas de réponse                       |                                         |                                         |
| Code _____                                 | Code _____                                | Code _____                              | Code _____                              |

**13 (Les membres de ce ménage pour lesquels une fièvre typhoïde a été diagnostiquée comme indiqué à la question 11 ont-ils reçu un traitement?) Quel traitement ont-ils reçu?**

*Instructions* : Cocher une réponse par membre du ménage uniquement.

| Membre 1<br>Initiales/Identifiant: ____            | Membre 2<br>Initiales/Identifiant: ____            | Membre 3<br>Initiales/Identifiant: ____            | Membre 4<br>Initiales/Identifiant: ____            |
|----------------------------------------------------|----------------------------------------------------|----------------------------------------------------|----------------------------------------------------|
| <input type="radio"/> 1=Traitement, préciser _____ | <input type="radio"/> 1=Traitement, préciser _____ | <input type="radio"/> 1=Traitement, préciser _____ | <input type="radio"/> 1=Traitement, préciser _____ |
| <input type="radio"/> 2=Pas applicable             | <input type="radio"/> 2=Pas applicable             | <input type="radio"/> 2=Pas applicable             | <input type="radio"/> 2=Pas applicable             |
| <input type="radio"/> 99=Ne sait pas               | <input type="radio"/> 99=Ne sait pas               | <input type="radio"/> 99=Ne sait pas               | <input type="radio"/> 99=Ne sait pas               |
| <input type="radio"/> 98=Pas de réponse            | <input type="radio"/> 98=Pas de réponse            | <input type="radio"/> 98=Pas de réponse            | <input type="radio"/> 98=Pas de réponse            |

Site \_\_\_\_ Sous-zone \_\_\_\_ Numéro d'habitation \_\_\_\_ Identifiant de l'enquêteur \_\_\_\_

**FORMULAIRE 5: ÉVALUATION DE L'UTILISATION RÉELLE DES SOINS DE SANTÉ GLOBAUX, STRATIFIÉE SELON L'ÂGE ET LE SEXE**

**Partie A: Évaluation de l'utilisation *réelle* des soins de santé  
COMPOTEMENT DE RECHERCHE DE SOINS**

**1 Consigner ci-dessous l'apparition de signe(s) ou symptôme(s) (voir liste 1) et préciser où (voir liste 2) et comment le(s) membre(s) a/ont recherché les soins de santé durant les 3 derniers mois ?**

*Instructions* : voir « formulaire 3- partie A-INFORMATIONS GENERALES SUR LE MENAGE » pour obtenir les initiaux/identifiants de chacun des membres du ménage. Indiquer seulement un signe/symptôme par ligne. Commencer avec une nouvelle ligne pour tous nouveaux soins de santé sélectionnée pour chaque signe/symptôme recurrent. Indiquer le nombre des apparitions de chaque signe/symptômes durant les 3 derniers mois. Si une différente option de soins de santé a été sélectionnée pour un signe/symptôme recurrent, indiquer cela dans une nouvelle ligne. Completer s'il vous plaît, un formulaire supplémentaire s'il y a eu plus de 20 signes/symptômes apparus durant les 3 derniers mois.

| Liste 1:<br>Signe/Symptôme                    |                                                                              | Liste 2:<br>Option de soins de santé |
|-----------------------------------------------|------------------------------------------------------------------------------|--------------------------------------|
| [A] Fièvre                                    | [N] Nausée/Vomissements                                                      | [1] EDS-SETA,<br>Code _____          |
| [B] Fièvre <3 jours (continus)                | [O] Diarrhée (liquide/sanglante/mucopurulente)                               | [2] Autre EDS<br>Code _____          |
| [C] Fièvre ≥3 jours (continus)                | [P] Douleur abdominale/Douleur intestinale                                   | [3] Médecin                          |
| [D] Frissons/Tremblements                     | [Q] Perte de sang/Hémorragie (interne)                                       | [4] Pharmacie                        |
| [E] Convulsion                                | [R] Perte de sang/Hémorragie (externe)                                       | [5] Guérisseur traditionnel          |
| [F] Perte de poids                            | [S] Éternuements Nez qui coule                                               | [6] Nulle part Auto-médication       |
| [G] Déshydratation                            | [T] Toux                                                                     | [7] Nulle part Rien                  |
| [H] Malaise/Faibles/Fatigue                   | [U] Respiration rapide/Essoufflement                                         |                                      |
| [I] Douleurs (muscles/articulations/os)       | [V] Difficultés respiratoires graves                                         |                                      |
| [J] Maux de tête                              | [W] Inflammation de la peau (éruptions cutanées/ rougeurs/pus/démangeaisons) |                                      |
| [K] Vertiges/Confusion/ Perte de connaissance | [X] Gonflement/Œdème                                                         |                                      |
| [L] Troubles de la pression sanguine          | [Y] Jaunisse                                                                 |                                      |
| [M] Troubles cardiaques                       |                                                                              |                                      |

| No. | Membre du ménage<br>Enregistrer les initiaux/identifiants du membre du ménage ; voir formulaire 3 –partie A- INFORMATIONS GENERALES SUR LE MENAGE » | Signes/<br>Symptômes<br>Utiliser la Liste 1 pour sélectionner le code | Options de soins de santé                     |          | Fréquence<br>Indiquer le nombre d'incidences pour le signe/symptôme listé |
|-----|-----------------------------------------------------------------------------------------------------------------------------------------------------|-----------------------------------------------------------------------|-----------------------------------------------|----------|---------------------------------------------------------------------------|
|     |                                                                                                                                                     |                                                                       | Utiliser la Liste 2 pour sélectionner le code | EDS Code |                                                                           |
| 1   |                                                                                                                                                     |                                                                       |                                               |          |                                                                           |
| 2   |                                                                                                                                                     |                                                                       |                                               |          |                                                                           |
| 3   |                                                                                                                                                     |                                                                       |                                               |          |                                                                           |
| 4   |                                                                                                                                                     |                                                                       |                                               |          |                                                                           |
| 5   |                                                                                                                                                     |                                                                       |                                               |          |                                                                           |

1  
2  
3  
4  
5  
6  
7  
8  
9  
10  
11  
12  
13  
14  
15  
16  
17  
18  
19  
20  
21  
22  
23  
24  
25  
26  
27  
28  
29  
30  
31  
32  
33  
34  
35  
36  
37  
38  
39  
40  
41  
42  
43  
44  
45  
46  
47  
48  
49  
50  
51  
52  
53  
54  
55  
56  
57  
58  
59  
60

|    |  |  |  |  |
|----|--|--|--|--|
| 6  |  |  |  |  |
| 7  |  |  |  |  |
| 8  |  |  |  |  |
| 9  |  |  |  |  |
| 10 |  |  |  |  |
| 11 |  |  |  |  |
| 12 |  |  |  |  |
| 13 |  |  |  |  |
| 14 |  |  |  |  |
| 15 |  |  |  |  |
| 16 |  |  |  |  |
| 17 |  |  |  |  |
| 18 |  |  |  |  |
| 19 |  |  |  |  |
| 20 |  |  |  |  |

For peer review only

## Appendix 4/Supplementary file 4: Geospatial random selection with application of simple, weighted-stratified sampling (examples of Ghana and Madagascar)

**Figure 1** Geographic random points generated by ArcGIS for Asante Akim North and Central, Ghana



The study area of Asante Akim North (light red rectangle) and Asante Akim Central (light green rectangle) is highlighted in grey. The geographic random points are shown as red and green points for Asante Akim North and Asante Akim Central, respectively. The illustration at the bottom, right highlighted in light blue shows the enlarged area that is indicated as a small central light blue highlighted rectangle. The X- and Y-data of four geographic random points are given as examples; points are indicated as yellow highlighted rectangles. ArcGIS-generated geographic random points converted and visualized in Google Earth Pro<sup>®</sup> for Asante Akim North and Central, Ghana, can be shared on request.

**Figure 2 Geographic random points generated by ArcGIS for Renivohitra/Antananarivo, Madagascar**

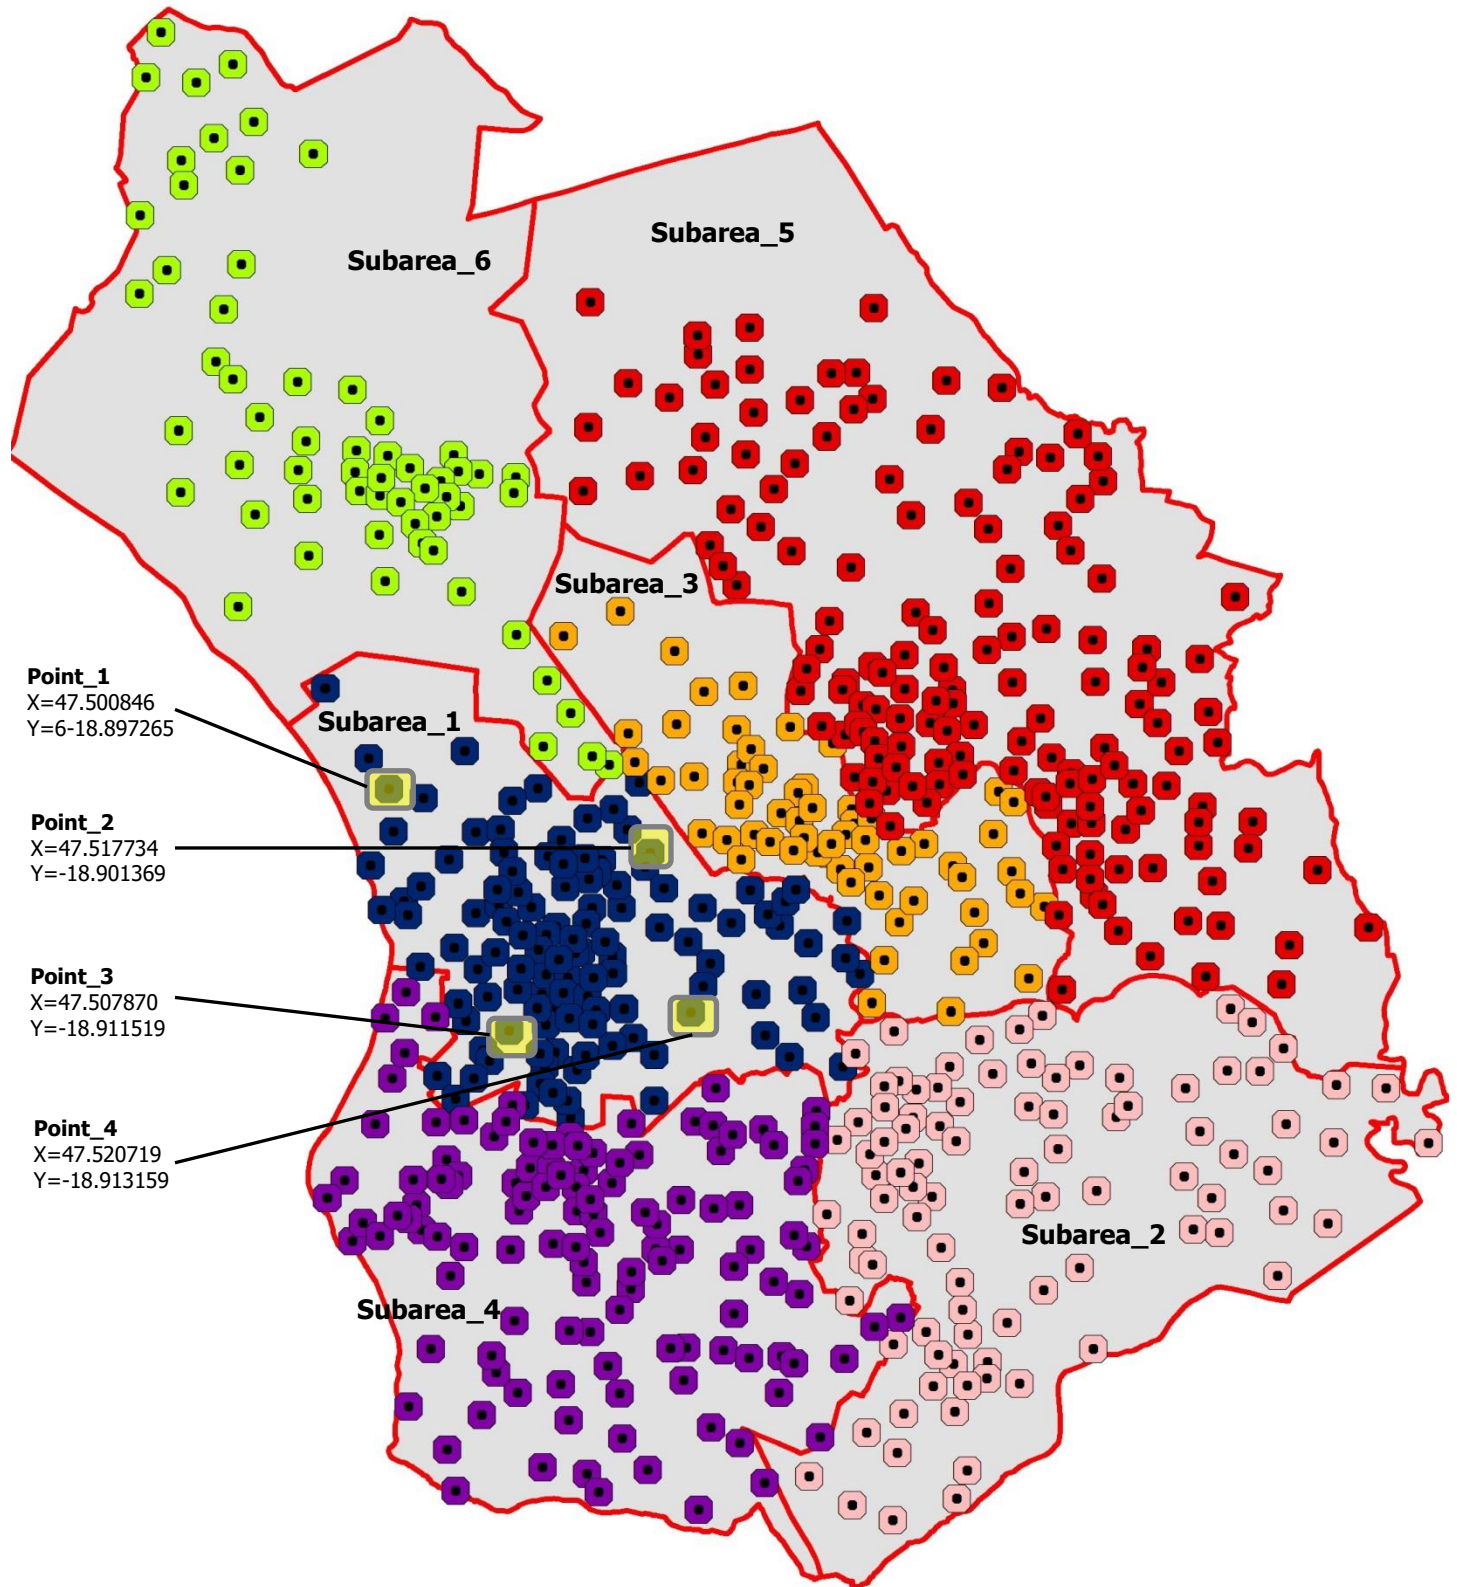

The study area of Renivohitra/Antananarivo, which is subdivided into six administrative subareas, is highlighted in grey. The geographic random points are shown as blue (subarea\_1), pink (subarea\_2), orange (subarea\_3), purple (subarea\_4), red (subarea\_5) and green (subarea\_6) points. The X- and Y-data of four geographic random points are given as examples; points are indicated as yellow highlighted rectangles. ArcGIS-generated geographic random points converted and visualized in Google Earth Pro® for Renivohitra/Antananarivo, Madagascar, can be shared on request.

**Appendix 5/Supplementary file 5: System diagram of the data collection and data management platform: the Android application “HPA Collect” and the platform “HPA Web”**

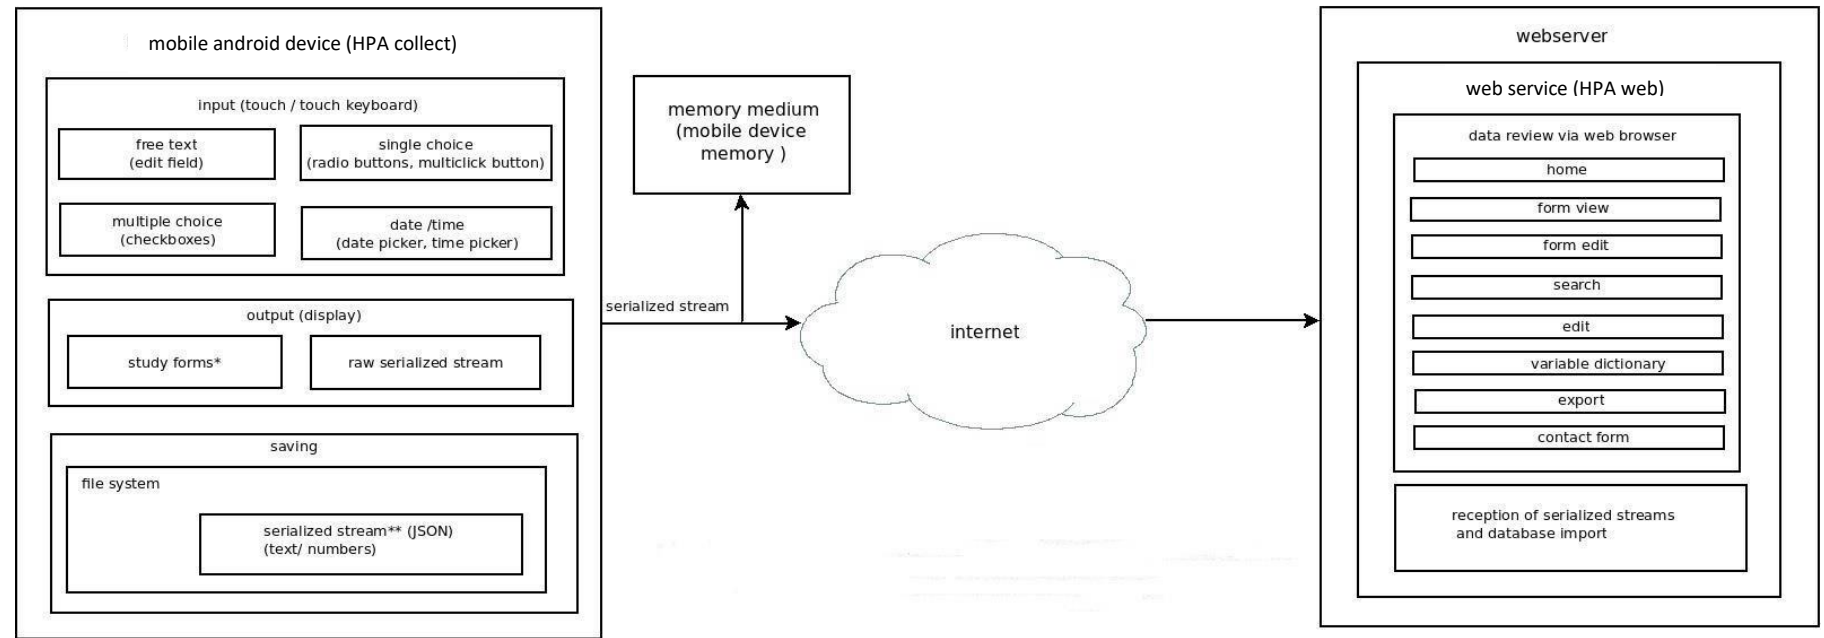

Note. \*study forms: Form 1, Form 3 Part A to C, Form 4 Part A to B, Form 5; \*\*serialized stream: two- or more-dimensional data (e.g. a table) is brought to a one-dimensional form; the application uses the JSON (Java Script Object Notation) format.
